# Supplementary material for: The long non-coding RNA Dali is an epigenetic regulator of neural differentiation
Source: eLife journal article supplement (doi:10.7554/elife.04530), 2014-11-21
Supplement: supp [file elife-04530-supp-v1.zip]

Archive with 13 entries (13 files):
- elife_poa_e04530_Figure_1_figure_supplement_1.pdf
- elife_poa_e04530_Figure_2_figure_supplement_1.pdf
- elife_poa_e04530_Figure_5_figure_supplement_1.pdf
- elife_poa_e04530_Figure_7_figure_supplement_1.pdf
- elife_poa_e04530_Supplementary_File_5.xlsx
- elife_poa_e04530_Figure_1_figure_supplement_2.pdf
- elife_poa_e04530_Supplementary_File_1.docx
- elife_poa_e04530_Supplementary_File_4.xlsx
- elife_poa_e04530_Supplementary_File_2.xlsx
- elife_poa_e04530_Supplementary_File_3.xlsx
- elife_poa_e04530_Supplementary_File_7.xlsx
- elife_poa_e04530_Supplementary_File_6.docx
- elife_poa_e04530_Figure_4_figure_supplement_1.pdf
