# Supplementary material for: The long non-coding RNA Dali is an epigenetic regulator of neural differentiation
Source: eLife journal article supplement (doi:10.7554/elife.04530), 2014-11-21
Supplement: supp [file elife-04530-supp-v1.zip › elife_poa_e04530_Supplementary_File_2.xlsx]

## Sheet: Transient DALI KD 0.1 FDR
ID	Symbol	Name	Ensembl	logFC	AveExpr	t	P.Value	adj.P.Val	B
10508651	Sdc3	syndecan 3	ENSMUSG00000025743	-1.35406	10.1511	-7.64047	6.22726e-09	4.44479e-05	9.99193
10544885	Fkbp14	FK506 binding protein 14	ENSMUSG00000038074	-1.53881	8.39797	-7.43993	1.114e-08	4.44479e-05	9.48033
10355500	Igfbp5	insulin-like growth factor binding protein 5	ENSMUSG00000026185	-1.1168	9.62109	-7.4387	1.118e-08	4.44479e-05	9.47718
10401673	Tgfb3	transforming growth factor, beta 3	ENSMUSG00000021253	-1.14094	9.04965	-6.9266	5.0274e-08	0.000148855	8.14685
10477920	Myl9	myosin, light polypeptide 9, regulatory	ENSMUSG00000067818	1.2543	8.72058	6.85364	6.24024e-08	0.000148855	7.95473
10544002	Creb3l2	cAMP responsive element binding protein 3-like 2	ENSMUSG00000038648	-1.01993	10.7256	-6.68863	1.01892e-07	0.000202543	7.51814
10483324	Scn9a	sodium channel, voltage-gated, type IX, alpha	ENSMUSG00000075316	-1.02237	9.58573	-6.16408	4.90223e-07	0.00083527	6.11292
10394978	Rrm2	ribonucleotide reductase M2	ENSMUSG00000020649	0.93105	11.2582	5.97409	8.6898e-07	0.00129554	5.59873
10505000	Nipsnap3b	nipsnap homolog 3B (C. elegans)	ENSMUSG00000015247	-0.899905	9.24445	-5.85712	1.23686e-06	0.00163912	5.28118
10364102	Chchd10	coiled-coil-helix-coiled-coil-helix domain containing 10	ENSMUSG00000049422	-0.864108	12.6083	-5.63719	2.40397e-06	0.00286721	4.6825
10586744	Anxa2	annexin A2	ENSMUSG00000032231	-0.903506	11.0532	-5.54662	3.16106e-06	0.00337043	4.43555
10607283	Maged2	melanoma antigen, family D, 2	ENSMUSG00000025268	-0.828231	9.78147	-5.52339	3.39105e-06	0.00337043	4.37218
10515337	Nasp	nuclear autoantigenic sperm protein (histone-binding)	ENSMUSG00000028693	0.88389	9.48093	5.43445	4.43687e-06	0.00379235	4.12953
10595664	Tmed3	transmembrane emp24 domain containing 3	ENSMUSG00000032353	-0.929282	9.78444	-5.42237	4.60177e-06	0.00379235	4.09658
10545644	Wbp1	WW domain binding protein 1	ENSMUSG00000030035	-0.849906	10.8221	-5.41053	4.76945e-06	0.00379235	4.06427
10425287	Kdelr3	KDEL (Lys-Asp-Glu-Leu) endoplasmic reticulum protein retention receptor 3	ENSMUSG00000010830	-0.88294	8.18122	-5.24085	7.96169e-06	0.00593494	3.60134
10398907	Pld4	phospholipase D family, member 4	ENSMUSG00000052160	-0.776803	7.99213	-5.19637	9.10515e-06	0.00635068	3.48004
10469312	Pter	phosphotriesterase related	ENSMUSG00000026730	-0.794825	8.57229	-5.16311	1.00657e-05	0.00635068	3.38937
10412267	Itga2	integrin alpha 2	ENSMUSG00000015533	-0.972959	10.1402	-5.16143	1.01168e-05	0.00635068	3.38479
10584549	Scn3b	sodium channel, voltage-gated, type III, beta	ENSMUSG00000049281	-0.782947	10.7135	-5.13699	1.08903e-05	0.00649445	3.31818
10461277	Ganab	alpha glucosidase 2 alpha neutral subunit	ENSMUSG00000071650	-0.778401	12.1238	-5.0746	1.31421e-05	0.00746407	3.14823
10391277	Ghdc	GH3 domain containing	ENSMUSG00000017747	-0.825608	9.96773	-5.02095	1.5445e-05	0.00803868	3.0022
10384539	Slc1a4	solute carrier family 1 (glutamate/neutral amino acid transporter), member 4	ENSMUSG00000020142	-0.784586	11.5034	-5.01973	1.55018e-05	0.00803868	2.99888
10484488	P2rx3	purinergic receptor P2X, ligand-gated ion channel, 3	ENSMUSG00000027071	-0.771975	11.7202	-4.99329	1.67846e-05	0.00834124	2.92696
10504730	Anp32b	acidic (leucine-rich) nuclear phosphoprotein 32 family, member B	ENSMUSG00000028333	0.767205	11.2801	4.96704	1.81628e-05	0.00836624	2.85558
10432492	Faim2	Fas apoptotic inhibitory molecule 2	ENSMUSG00000023011	-0.8459	10.9177	-4.96567	1.82378e-05	0.00836624	2.85186
10472501	Lass6	LAG1 homolog, ceramide synthase 6	ENSMUSG00000027035	-0.743856	10.6419	-4.94017	1.96896e-05	0.0086977	2.78257
10416037	Pbk	PDZ binding kinase	ENSMUSG00000022033	0.796466	10.1028	4.90681	2.17635e-05	0.00927047	2.69198
10381334	Cntd1	cyclin N-terminal domain containing 1	ENSMUSG00000078653	0.735352	8.00901	4.83595	2.69155e-05	0.0108836	2.49977
10596137	Srprb	signal recognition particle receptor, B subunit	c(\ENSMUSG00000090639\", \"ENSMUSG00000032553\")"	-0.783687	10.7176	-4.83029	2.73755e-05	0.0108836	2.48443
10404053	Hist1h2bc	histone cluster 1, H2bc	c(\ENSMUSG00000018102\", \"ENSMUSG00000047246\", \"ENSMUSG00000058385\")"	0.873636	11.3829	4.77827	3.19885e-05	0.0123036	2.34355
10382376	Ttyh2	tweety homolog 2 (Drosophila)	ENSMUSG00000034714	-0.735386	11.4907	-4.76775	3.30105e-05	0.0123036	2.3151
10366457	Ptprr	protein tyrosine phosphatase, receptor type, R	ENSMUSG00000020151	-0.771426	9.75055	-4.68427	4.23577e-05	0.0153091	2.08954
10462973	Hells	helicase, lymphoid specific	ENSMUSG00000025001	0.821616	10.178	4.64276	4.79361e-05	0.0163686	1.97763
10452030	Plin3	perilipin 3	ENSMUSG00000024197	-0.753605	10.3011	-4.64207	4.8034e-05	0.0163686	1.97578
10374083	Aebp1	AE binding protein 1	ENSMUSG00000020473	-0.798517	10.4272	-4.61172	5.25758e-05	0.0173869	1.89406
10353420	Mcm3	minichromosome maintenance deficient 3 (S. cerevisiae)	ENSMUSG00000041859	0.785713	10.612	4.60313	5.39378e-05	0.0173869	1.87093
10525591	Kntc1	kinetochore associated 1	ENSMUSG00000029414	0.724295	9.4554	4.59162	5.58152e-05	0.0175186	1.83998
10463476	Kazald1	Kazal-type serine peptidase inhibitor domain 1	ENSMUSG00000025213	-0.701209	8.95276	-4.56421	6.05511e-05	0.0185178	1.76632
10559820	Zfp954	zinc finger protein 954	ENSMUSG00000062116	-0.765255	9.72877	-4.54272	6.45411e-05	0.0190142	1.70861
10461012	Trmt112	tRNA methyltransferase 11-2 homolog (S. cerevisiae)	ENSMUSG00000038812	-0.704214	11.3404	-4.53378	6.62754e-05	0.0190142	1.68463
10544084	Zc3hav1l	zinc finger CCCH-type, antiviral 1-like	ENSMUSG00000047749	0.668936	9.95625	4.52297	6.84344e-05	0.0190142	1.65564
10371321	Slc41a2	solute carrier family 41, member 2	ENSMUSG00000034591	-0.726004	10.6498	-4.5224	6.85511e-05	0.0190142	1.6541
10582180	Fam92b	family with sequence similarity 92, member B	ENSMUSG00000042269	-0.861471	7.78562	-4.50897	7.13338e-05	0.0193363	1.61812
10537353	Ttc26	tetratricopeptide repeat domain 26	ENSMUSG00000056832	-0.6903	8.97736	-4.47993	7.77412e-05	0.020414	1.54035
10396896	Slc39a9	solute carrier family 39 (zinc transporter), member 9	ENSMUSG00000048833	-0.703432	10.2062	-4.47565	7.87327e-05	0.020414	1.52889
10540738	Fancd2	Fanconi anemia, complementation group D2	ENSMUSG00000034023	0.698268	9.99959	4.45969	8.25392e-05	0.0209456	1.4862
10495549	Dbt	dihydrolipoamide branched chain transacylase E2	ENSMUSG00000000340	-0.663253	9.56335	-4.44446	8.63418e-05	0.0214541	1.44548
10474902	Rad51	RAD51 homolog (S. cerevisiae)	ENSMUSG00000027323	0.794795	9.69822	4.4249	9.14764e-05	0.0222661	1.39326
10590494	Kif15	kinesin family member 15	ENSMUSG00000036768	0.707354	9.96199	4.395	9.99149e-05	0.0238337	1.3135
10509168	E2f2	E2F transcription factor 2	ENSMUSG00000018983	0.685026	9.61378	4.37068	0.000107341	0.0243747	1.24871
10368556	Hey2	hairy/enhancer-of-split related with YRPW motif 2	ENSMUSG00000019789	-0.689932	8.58284	-4.35041	0.000113944	0.0243747	1.19477
10406598	Serinc5	serine incorporator 5	ENSMUSG00000021703	-0.736526	10.8028	-4.3474	0.000114956	0.0243747	1.18678
10439218	Pdia5	protein disulfide isomerase associated 5	ENSMUSG00000022844	-0.679535	10.9938	-4.34669	0.000115197	0.0243747	1.18489
10389606	Prr11	proline rich 11	ENSMUSG00000020493	0.702053	11.0156	4.34665	0.000115209	0.0243747	1.1848
10486197	Rhov	ras homolog gene family, member V	ENSMUSG00000034226	-0.723368	8.24075	-4.3419	0.000116829	0.0243747	1.17217
10345423	Plekhb2	pleckstrin homology domain containing, family B (evectins) member 2	ENSMUSG00000026123	-0.684265	11.51	-4.3387	0.000117935	0.0243747	1.16366
10526559	Ache	acetylcholinesterase	ENSMUSG00000023328	-0.74576	10.8043	-4.33698	0.000118532	0.0243747	1.1591
10504817	Tgfbr1	transforming growth factor, beta receptor I	ENSMUSG00000007613	-0.673742	10.8814	-4.32344	0.000123349	0.0245499	1.12311
10462796	Kif11	kinesin family member 11	ENSMUSG00000012443	0.696404	11.6321	4.32302	0.000123501	0.0245499	1.122
10381934	Tanc2	tetratricopeptide repeat, ankyrin repeat and coiled-coil containing 2	ENSMUSG00000053580	-0.716591	10.6633	-4.31739	0.000125561	0.0245503	1.10705
10357858	Optc	opticin	ENSMUSG00000010311	-0.650438	9.17819	-4.30137	0.000131609	0.0253178	1.06455
10385271	Ccng1	cyclin G1	ENSMUSG00000020326	-0.642597	11.067	-4.28694	0.000137299	0.0259931	1.02632
10476989	Gins1	GINS complex subunit 1 (Psf1 homolog)	ENSMUSG00000027454	0.711368	9.46971	4.26332	0.000147145	0.0269946	0.963772
10522060	Fam114a1	family with sequence similarity 114, member A1	ENSMUSG00000029185	-0.824851	9.2948	-4.26237	0.000147556	0.0269946	0.961255
10603533	Ssxb3	synovial sarcoma, X member B, breakpoint 3	ENSMUSG00000079701	-0.757972	6.25959	-4.25379	0.000151308	0.0269946	0.938577
10495945	4930422G04Rik	RIKEN cDNA 4930422G04 gene	ENSMUSG00000051278	0.643462	8.62255	4.25304	0.000151642	0.0269946	0.936583
10390691	Nr1d1	nuclear receptor subfamily 1, group D, member 1	ENSMUSG00000020889	-0.694583	10.9719	-4.23422	0.000160231	0.028104	0.886837
10605674	Pola1	polymerase (DNA directed), alpha 1	ENSMUSG00000006678	0.719418	9.38175	4.21724	0.000168386	0.0291064	0.842017
10483865	Fkbp7	FK506 binding protein 7	ENSMUSG00000002732	-0.669545	9.75433	-4.21116	0.000171403	0.0292047	0.825984
10405587	Tgfbi	transforming growth factor, beta induced	ENSMUSG00000035493	-0.653365	10.7871	-4.19813	0.000178051	0.02991	0.791637
10384378	Ddc	dopa decarboxylase	ENSMUSG00000020182	0.679875	8.0538	4.18576	0.000184598	0.0305791	0.759044
10361110	Dtl	denticleless homolog (Drosophila)	ENSMUSG00000037474	0.677731	11.6798	4.17767	0.000189005	0.0308804	0.737746
10472916	Cdca7	cell division cycle associated 7	ENSMUSG00000055612	0.649603	10.0937	4.17147	0.000192451	0.0310185	0.72144
10462632	Kif20b	kinesin family member 20B	ENSMUSG00000024795	0.697877	9.87807	4.15067	0.000204472	0.0319816	0.666768
10515431	Kif2c	kinesin family member 2C	ENSMUSG00000028678	0.668942	10.526	4.14862	0.000205699	0.0319816	0.66137
10395702	Akap6	A kinase (PRKA) anchor protein 6	ENSMUSG00000061603	-0.626449	9.62011	-4.14733	0.000206471	0.0319816	0.657987
10461423	Fads3	fatty acid desaturase 3	ENSMUSG00000024664	-0.646471	11.5736	-4.13595	0.000213421	0.0326342	0.628121
10357436	Mcm6	minichromosome maintenance deficient 6 (MIS5 homolog, S. pombe) (S. cerevisiae)	ENSMUSG00000026355	0.666367	10.9505	4.12493	0.000220373	0.0332708	0.599201
10556266	Wee1	WEE 1 homolog 1 (S. pombe)	ENSMUSG00000031016	0.631587	10.5781	4.11927	0.000224022	0.0333988	0.584388
10452485	Rab31	RAB31, member RAS oncogene family	ENSMUSG00000056515	-0.605945	10.6899	-4.07574	0.000254189	0.0374286	0.470451
10345571	Cnga3	cyclic nucleotide gated channel alpha 3	ENSMUSG00000026114	-0.617032	9.04515	-4.06442	0.000262663	0.0382047	0.440883
10409866	Ctla2b	cytotoxic T lymphocyte-associated protein 2 beta	ENSMUSG00000074874	-0.667357	9.21767	-4.05253	0.000271859	0.0388562	0.40986
10569542	Mrgpre	MAS-related GPR, member E	ENSMUSG00000048965	-0.608288	8.60979	-4.05025	0.000273658	0.0388562	0.403915
10607259	Tro	trophinin	ENSMUSG00000025272	-0.603475	9.78947	-4.04588	0.000277141	0.0388878	0.392516
10597427	Trim71	tripartite motif-containing 71	ENSMUSG00000079259	0.618848	9.40159	4.03929	0.000282468	0.0391743	0.375356
10409876	Ctla2a	cytotoxic T lymphocyte-associated protein 2 alpha	ENSMUSG00000044258	-0.760363	10.1158	-4.03077	0.000289515	0.0396716	0.353145
10602688	Usp51	ubiquitin specific protease 51	ENSMUSG00000067215	0.647773	10.0728	4.02697	0.000292706	0.0396716	0.343268
10608655	H60a	histocompatibility 60a	NA	-0.678162	10.8244	-4.01047	0.000306992	0.0411403	0.300326
10454546	Map3k2	mitogen-activated protein kinase kinase kinase 2	ENSMUSG00000024383	-0.599735	9.79524	-4.00215	0.000314444	0.0416708	0.278716
10483326	Scn9a	sodium channel, voltage-gated, type IX, alpha	ENSMUSG00000075316	-0.603153	10.3753	-3.97581	0.000339236	0.0444623	0.210352
10442270	Zfp946	zinc finger protein 946	ENSMUSG00000071266	-0.59862	8.76692	-3.95816	0.000356905	0.0459026	0.164626
10404036	Hist1h2bg	histone cluster 1, H2bg	c(\ENSMUSG00000018102\", \"ENSMUSG00000047246\", \"ENSMUSG00000058385\")"	0.619788	8.78402	3.95375	0.000361459	0.0459026	0.153208
10402444	Dicer1	Dicer1, Dcr-1 homolog (Drosophila)	ENSMUSG00000041415	0.591395	11.487	3.95345	0.000361771	0.0459026	0.152431
10539773	Gfpt1	glutamine fructose-6-phosphate transaminase 1	ENSMUSG00000029992	-0.588265	10.5121	-3.947	0.000368537	0.0462688	0.135749
10401028	Sgpp1	sphingosine-1-phosphate phosphatase 1	ENSMUSG00000021054	-0.601898	11.3392	-3.9399	0.000376129	0.0467301	0.117389
10368289	Enpp1	ectonucleotide pyrophosphatase/phosphodiesterase 1	ENSMUSG00000037370	-0.640132	12.148	-3.9303	0.000386638	0.0470401	0.0925815
10483679	Gpr155	G protein-coupled receptor 155	ENSMUSG00000041762	-0.613092	9.43488	-3.92922	0.000387836	0.0470401	0.089797
10413012	Fut11	fucosyltransferase 11	ENSMUSG00000039357	-0.674484	7.49124	-3.92688	0.000390456	0.0470401	0.0837351
10442238	3110052M02Rik	RIKEN cDNA 3110052M02 gene	ENSMUSG00000035868	-0.659967	9.01739	-3.9178	0.00040075	0.0477974	0.0603139
10409602	Trpc7	transient receptor potential cation channel, subfamily C, member 7	ENSMUSG00000021541	-0.616122	9.32655	-3.9117	0.000407824	0.0481595	0.0445658
10404874	Mylip	myosin regulatory light chain interacting protein	ENSMUSG00000038175	-0.64868	9.767	-3.90629	0.000414187	0.0484314	0.0306323
10559509	Cdc42ep5	CDC42 effector protein (Rho GTPase binding) 5	ENSMUSG00000063838	-0.658711	8.6461	-3.89686	0.000425529	0.0491722	0.00632123
10352048	Exo1	exonuclease 1	ENSMUSG00000039748	0.738154	10.0038	3.89384	0.000429214	0.0491722	-0.00143592
10539143	Retsat	retinol saturase (all trans retinol 13,14 reductase)	ENSMUSG00000056666	-0.602265	9.56713	-3.89013	0.000433791	0.0491722	-0.0109808
10586448	2810417H13Rik	RIKEN cDNA 2810417H13 gene	ENSMUSG00000040204	0.68047	10.9707	3.88755	0.000437013	0.0491722	-0.0176366
10563753	Mrgprx2	MAS-related GPR, member X2	ENSMUSG00000074109	-0.618283	8.53298	-3.87075	0.000458507	0.050933	-0.0608287
10499545	Efna3	ephrin A3	ENSMUSG00000028039	-0.788831	8.60847	-3.8687	0.000461202	0.050933	-0.0661009
10361375	Fbxo5	F-box protein 5	ENSMUSG00000019773	0.616091	10.6667	3.85057	0.000485688	0.0525255	-0.112623
10515257	Rad54l	RAD54 like (S. cerevisiae)	ENSMUSG00000028702	0.660198	9.31084	3.84326	0.000495919	0.0525255	-0.131367
10475362	Wdr76	WD repeat domain 76	ENSMUSG00000027242	0.600175	9.78225	3.84239	0.000497154	0.0525255	-0.133603
10437945	Mcm4	minichromosome maintenance deficient 4 homolog (S. cerevisiae)	ENSMUSG00000022673	0.704996	10.7364	3.84211	0.000497544	0.0525255	-0.134308
10515399	Plk3	polo-like kinase 3 (Drosophila)	ENSMUSG00000028680	-0.592665	11.1036	-3.84204	0.000497642	0.0525255	-0.134486
10530059	Sel1l3	sel-1 suppressor of lin-12-like 3 (C. elegans)	ENSMUSG00000029189	-0.625912	11.46	-3.83274	0.000511015	0.0531683	-0.158326
10401737	Tmed8	transmembrane emp24 domain containing 8	ENSMUSG00000034111	-0.569693	10.3467	-3.83032	0.000514547	0.0531683	-0.164519
10563077	Rcn3	reticulocalbin 3, EF-hand calcium binding domain	ENSMUSG00000019539	-0.672708	12.0071	-3.82858	0.000517106	0.0531683	-0.168978
10467784	Pyroxd2	pyridine nucleotide-disulphide oxidoreductase domain 2	ENSMUSG00000060224	-0.611271	9.3994	-3.82497	0.000522434	0.053257	-0.178193
10350838	2810417H13Rik	RIKEN cDNA 2810417H13 gene	ENSMUSG00000040204	0.639663	11.3239	3.81451	0.000538227	0.054402	-0.204961
10416736	6720463M24Rik	RIKEN cDNA 6720463M24 gene	ENSMUSG00000022070	0.58531	9.46371	3.81011	0.000544994	0.0546231	-0.216191
10488982	Cpne1	copine I	ENSMUSG00000074643	0.613035	10.2135	3.80348	0.000555362	0.0551984	-0.233126
10488797	Pxmp4	peroxisomal membrane protein 4	ENSMUSG00000000876	-0.656614	10.5583	-3.78253	0.000589397	0.056514	-0.286565
10599187	Zcchc12	zinc finger, CCHC domain containing 12	ENSMUSG00000036699	-0.580896	10.748	-3.77913	0.000595104	0.056514	-0.29522
10432236	Rnd1	Rho family GTPase 1	ENSMUSG00000054855	-0.600228	8.75719	-3.77791	0.000597179	0.056514	-0.298348
10469138	4930412O13Rik	RIKEN cDNA 4930412O13 gene	NA	-0.668285	9.38829	-3.77587	0.000600643	0.056514	-0.303542
10540472	Bhlhe40	basic helix-loop-helix family, member e40	ENSMUSG00000030103	-0.577976	10.1362	-3.77194	0.00060736	0.056514	-0.313531
10500666	Ptgfrn	prostaglandin F2 receptor negative regulator	ENSMUSG00000027864	0.668928	9.35256	3.77031	0.000610178	0.056514	-0.317688
10349932	Etnk2	ethanolamine kinase 2	ENSMUSG00000070644	-0.760404	7.48423	-3.76826	0.000613722	0.056514	-0.32289
10497817	Anxa5	annexin A5	ENSMUSG00000027712	-0.562071	11.7202	-3.76685	0.000616191	0.056514	-0.326496
10435581	Polq	polymerase (DNA directed), theta	ENSMUSG00000034206	0.599437	8.99028	3.7658	0.000618019	0.056514	-0.329156
10374400	Fbxo48	F-box protein 48	ENSMUSG00000044966	0.627826	8.51827	3.76506	0.000619313	0.056514	-0.331035
10486255	Oip5	Opa interacting protein 5	ENSMUSG00000072980	0.583391	8.98083	3.76426	0.00062072	0.056514	-0.333073
10368883	Tdg	thymine DNA glycosylase	ENSMUSG00000034674	0.562128	11.3532	3.75864	0.000630682	0.0569581	-0.347371
10468795	Rab11fip2	RAB11 family interacting protein 2 (class I)	ENSMUSG00000040022	-0.591231	8.89985	-3.75436	0.000638357	0.0569581	-0.358232
10404033	Hist1h1d	histone cluster 1, H1d	ENSMUSG00000052565	0.598415	8.00086	3.7535	0.000639925	0.0569581	-0.360434
10500276	BC028528	cDNA sequence BC028528	ENSMUSG00000038543	-0.671721	8.68917	-3.75021	0.000645912	0.0570651	-0.368795
10479811	Mcm10	minichromosome maintenance deficient 10 (S. cerevisiae)	ENSMUSG00000026669	0.627767	10.5594	3.74567	0.000654258	0.0573774	-0.380322
10372497	Thap2	THAP domain containing, apoptosis associated protein 2	ENSMUSG00000020137	0.583048	8.96832	3.73607	0.000672239	0.0576458	-0.404661
10449712	Cbs	cystathionine beta-synthase	ENSMUSG00000024039	-0.580746	9.57807	-3.73415	0.000675899	0.0576458	-0.409534
10492682	Fam198b	family with sequence similarity 198, member B	ENSMUSG00000027955	-0.573331	8.61302	-3.7336	0.000676948	0.0576458	-0.410927
10460392	Pold4	polymerase (DNA-directed), delta 4	ENSMUSG00000024854	-0.613447	9.31065	-3.73229	0.000679472	0.0576458	-0.414266
10514818	BC055111	cDNA sequence BC055111	ENSMUSG00000054362	-0.57826	8.79065	-3.73124	0.000681484	0.0576458	-0.416921
10462390	Cd274	CD274 antigen	ENSMUSG00000016496	-0.559176	9.49781	-3.71921	0.000705029	0.0589802	-0.447404
10471154	Ass1	argininosuccinate synthetase 1	ENSMUSG00000076441	-0.555615	8.91716	-3.71573	0.000711979	0.0589802	-0.456207
10567589	Usp31	ubiquitin specific peptidase 31	ENSMUSG00000063317	0.568535	9.50401	3.71567	0.000712094	0.0589802	-0.456351
10400515	Sec23a	SEC23A (S. cerevisiae)	ENSMUSG00000020986	-0.591625	11.5641	-3.713	0.000717489	0.0590172	-0.463124
10592201	Chek1	checkpoint kinase 1 homolog (S. pombe)	ENSMUSG00000032113	0.644478	10.0868	3.7095	0.000724588	0.0591928	-0.471957
10549842	Zfp667	zinc finger protein 667	ENSMUSG00000054893	-0.605951	8.43068	-3.70623	0.000731305	0.0593352	-0.480237
10485562	Hipk3	homeodomain interacting protein kinase 3	ENSMUSG00000027177	0.551165	10.8542	3.70312	0.000737733	0.0594523	-0.488087
10430871	Tdg	thymine DNA glycosylase	ENSMUSG00000034674	0.551187	11.3596	3.69436	0.000756164	0.0605286	-0.510224
10398388	Mir380	microRNA 380	NA	-0.589268	4.99319	-3.69067	0.000764072	0.0607518	-0.519556
10384373	Fignl1	fidgetin-like 1	ENSMUSG00000035455	0.601147	10.2481	3.68832	0.000769139	0.0607518	-0.525484
10554240	Isg20	interferon-stimulated protein	ENSMUSG00000039236	-0.687746	9.71106	-3.68479	0.000776804	0.0609536	-0.534378
10587503	Sh3bgrl2	SH3 domain binding glutamic acid-rich protein like 2	ENSMUSG00000032261	-0.552763	9.17242	-3.67957	0.000788292	0.0614507	-0.547542
10578690	Neil3	nei like 3 (E. coli)	ENSMUSG00000039396	0.582687	10.4912	3.67717	0.000793632	0.0614653	-0.553597
10389795	Stxbp4	syntaxin binding protein 4	ENSMUSG00000020546	-0.576733	9.71954	-3.67202	0.000805206	0.061774	-0.566579
10396068	Lrr1	leucine rich repeat protein 1	ENSMUSG00000034883	0.604532	10.0121	3.67011	0.000809543	0.061774	-0.571396
10472181	Galnt5	UDP-N-acetyl-alpha-D-galactosamine:polypeptide N-acetylgalactosaminyltransferase 5	ENSMUSG00000026828	-0.562573	6.8938	-3.66852	0.000813156	0.061774	-0.575388
10458251	Sil1	endoplasmic reticulum chaperone SIL1 homolog (S. cerevisiae)	ENSMUSG00000024357	-0.747069	10.9803	-3.66314	0.000825543	0.0619731	-0.588943
10549402	Ergic2	ERGIC and golgi 2	ENSMUSG00000030304	-0.554884	11.1865	-3.66287	0.00082617	0.0619731	-0.589623
10495935	4930422G04Rik	RIKEN cDNA 4930422G04 gene	ENSMUSG00000051278	0.612	9.82553	3.65684	0.000840256	0.0625057	-0.604778
10555946	Smpd1	sphingomyelin phosphodiesterase 1, acid lysosomal	ENSMUSG00000037049	-0.596063	11.3414	-3.65536	0.000843751	0.0625057	-0.608499
10535732	Gpr12	G-protein coupled receptor 12	ENSMUSG00000041468	-0.582451	8.21547	-3.65104	0.000854034	0.0628769	-0.619356
10482030	Stom	stomatin	ENSMUSG00000026880	-0.552364	12.7911	-3.64659	0.000864752	0.062936	-0.630534
10577792	Plekha2	pleckstrin homology domain-containing, family A (phosphoinositide binding specific) member 2	ENSMUSG00000031557	-0.665841	10.9547	-3.64557	0.000867226	0.062936	-0.633094
10498885	Gria2	glutamate receptor, ionotropic, AMPA2 (alpha 2)	ENSMUSG00000033981	-0.579054	10.1006	-3.64416	0.000870667	0.062936	-0.636643
10432032	Vdr	vitamin D receptor	ENSMUSG00000022479	-0.739064	9.22968	-3.63965	0.000881753	0.0633084	-0.647981
10391963	Nsf	N-ethylmaleimide sensitive fusion protein	ENSMUSG00000034187	0.548783	10.9499	3.63776	0.000886434	0.0633084	-0.652726
10475199	Snap23	synaptosomal-associated protein 23	ENSMUSG00000027287	-0.569498	10.7269	-3.63259	0.00089934	0.0638478	-0.665677
10487021	Slc30a4	solute carrier family 30 (zinc transporter), member 4	ENSMUSG00000005802	-0.581798	10.02	-3.62742	0.000912464	0.0643962	-0.678657
10365230	Tdg	thymine DNA glycosylase	ENSMUSG00000034674	0.540059	11.0479	3.62041	0.000930518	0.0651418	-0.696208
10554281	Fanci	Fanconi anemia, complementation group I	ENSMUSG00000039187	0.58032	8.97619	3.6191	0.000933952	0.0651418	-0.699508
10363541	Ass1	argininosuccinate synthetase 1	ENSMUSG00000076441	-0.549347	8.96639	-3.61472	0.000945446	0.0655601	-0.710464
10572906	Mcm5	minichromosome maintenance deficient 5, cell division cycle 46 (S. cerevisiae)	ENSMUSG00000005410	0.623659	11.1206	3.61186	0.000953021	0.0657034	-0.717611
10541307	Usp18	ubiquitin specific peptidase 18	ENSMUSG00000030107	-0.615192	8.87544	-3.60578	0.000969355	0.0663012	-0.73283
10562192	Fxyd5	FXYD domain-containing ion transport regulator 5	ENSMUSG00000009687	-0.599596	9.73305	-3.60338	0.000975874	0.0663012	-0.738832
10381072	Cdc6	cell division cycle 6 homolog (S. cerevisiae)	ENSMUSG00000017499	0.601167	9.01562	3.60067	0.000983269	0.0663012	-0.745592
10564663	Tdg	thymine DNA glycosylase	ENSMUSG00000034674	0.537479	11.1491	3.60043	0.000983928	0.0663012	-0.746192
10344707	Pcmtd1	protein-L-isoaspartate (D-aspartate) O-methyltransferase domain containing 1	ENSMUSG00000051285	-0.544649	9.48418	-3.59293	0.00100474	0.0673231	-0.76493
10541877	Vamp1	vesicle-associated membrane protein 1	ENSMUSG00000030337	-0.596835	8.85317	-3.58813	0.00101829	0.06785	-0.776925
10602068	Mid2	midline 2	ENSMUSG00000000266	-0.633516	9.99812	-3.58003	0.00104152	0.0690126	-0.797119
10582403	Galns	galactosamine (N-acetyl)-6-sulfate sulfatase	ENSMUSG00000015027	-0.545866	10.8361	-3.57797	0.00104751	0.0690255	-0.802246
10389395	Brip1	BRCA1 interacting protein C-terminal helicase 1	ENSMUSG00000034329	0.567518	9.44857	3.57108	0.00106781	0.0695935	-0.819425
10588691	Hyal1	hyaluronoglucosaminidase 1	ENSMUSG00000010051	-0.572412	7.9196	-3.56829	0.00107612	0.0695935	-0.826362
10493421	Fam189b	family with sequence similarity 189, member B	ENSMUSG00000032657	-0.561092	9.53185	-3.56746	0.00107863	0.0695935	-0.828445
10534667	Serpine1	serine (or cysteine) peptidase inhibitor, clade E, member 1	ENSMUSG00000037411	-0.576651	9.93709	-3.56718	0.00107947	0.0695935	-0.829141
10576883	Shcbp1	Shc SH2-domain binding protein 1	ENSMUSG00000022322	0.58382	10.2085	3.56109	0.0010979	0.0704015	-0.844293
10420877	Esco2	establishment of cohesion 1 homolog 2 (S. cerevisiae)	ENSMUSG00000022034	0.583581	10.0199	3.55663	0.0011116	0.0706892	-0.855384
10385926	Cdc42se2	CDC42 small effector 2	ENSMUSG00000052298	-0.529253	10.8112	-3.55455	0.00111803	0.0706892	-0.860546
10538082	Atp6v0e2	ATPase, H+ transporting, lysosomal V0 subunit E2	ENSMUSG00000039347	-0.53503	11.3123	-3.55386	0.00112017	0.0706892	-0.862255
10545682	Tet3	tet oncogene family member 3	ENSMUSG00000034832	0.537898	10.6919	3.54824	0.00113781	0.0714246	-0.876234
10506118	Usp1	ubiquitin specific peptidase 1	ENSMUSG00000028560	0.547374	10.7187	3.54599	0.00114495	0.0714962	-0.881825
10502770	Lphn2	latrophilin 2	ENSMUSG00000028184	0.585395	9.40464	3.53496	0.0011805	0.0733325	-0.909173
10594426	Zwilch	Zwilch, kinetochore associated, homolog (Drosophila)	ENSMUSG00000032400	0.580427	9.9626	3.527	0.00120684	0.0743548	-0.928901
10492699	Ctso	cathepsin O	ENSMUSG00000028015	-0.549583	10.1611	-3.52623	0.00120943	0.0743548	-0.930818
10410560	Trip13	thyroid hormone receptor interactor 13	ENSMUSG00000021569	0.597702	10.4031	3.5229	0.00122063	0.0746586	-0.93906
10508759	Rpa2	replication protein A2	ENSMUSG00000028884	0.551551	10.6157	3.51771	0.0012383	0.0751512	-0.95191
10394093	BC017643	cDNA sequence BC017643	ENSMUSG00000039294	-0.539314	10.4135	-3.51516	0.00124707	0.0751512	-0.958217
10381939	Tanc2	tetratricopeptide repeat, ankyrin repeat and coiled-coil containing 2	ENSMUSG00000053580	-0.565604	9.35515	-3.51333	0.00125341	0.0751512	-0.962751
10397975	Ifi27l1	interferon, alpha-inducible protein 27 like 1	ENSMUSG00000064215	-0.584696	11.6024	-3.5106	0.00126292	0.0751512	-0.969504
10373634	Olfr803	olfactory receptor 803	ENSMUSG00000046041	0.545984	4.56697	3.50962	0.00126633	0.0751512	-0.971913
10506767	Echdc2	enoyl Coenzyme A hydratase domain containing 2	ENSMUSG00000028601	-0.56564	9.53316	-3.50958	0.00126649	0.0751512	-0.972024
10399391	Gen1	Gen homolog 1, endonuclease (Drosophila)	ENSMUSG00000051235	0.62978	9.64032	3.50562	0.00128041	0.075601	-0.981792
10401607	Pgf	placental growth factor	ENSMUSG00000004791	-0.536275	11.3951	-3.49404	0.00132207	0.0773249	-1.01041
10442236	3110052M02Rik	RIKEN cDNA 3110052M02 gene	ENSMUSG00000035868	-0.547476	9.5408	-3.4939	0.00132257	0.0773249	-1.01074
10493555	Kcnn3	potassium intermediate/small conductance calcium-activated channel, subfamily N, member 3	ENSMUSG00000000794	-0.593683	10.4349	-3.48793	0.00134455	0.0775803	-1.02547
10599174	Il13ra1	interleukin 13 receptor, alpha 1	ENSMUSG00000017057	-0.72293	9.10423	-3.48792	0.0013446	0.0775803	-1.0255
10379363	Atad5	ATPase family, AAA domain containing 5	ENSMUSG00000017550	0.591838	9.10834	3.48686	0.00134851	0.0775803	-1.02809
10510172	Hmgb2	high mobility group box 2	ENSMUSG00000054717	0.556577	11.1827	3.48567	0.00135296	0.0775803	-1.03103
10505270	Slc31a2	solute carrier family 31, member 2	ENSMUSG00000066152	-0.529304	10.1719	-3.48247	0.00136495	0.0776732	-1.03891
10427166	Espl1	extra spindle poles-like 1 (S. cerevisiae)	ENSMUSG00000058290	0.554372	10.3833	3.48177	0.0013676	0.0776732	-1.04065
10471721	Ptgs1	prostaglandin-endoperoxide synthase 1	ENSMUSG00000047250	-0.569766	11.8688	-3.47935	0.00137675	0.0778225	-1.04661
10551162	Atp5sl	ATP5S-like	ENSMUSG00000057229	-0.535517	8.93417	-3.4757	0.00139068	0.0782387	-1.05559
10404059	Hist1h1c	histone cluster 1, H1c	ENSMUSG00000036181	0.523867	10.8776	3.47189	0.00140536	0.0784383	-1.06497
10500808	Olfml3	olfactomedin-like 3	ENSMUSG00000027848	-0.58056	11.5747	-3.47104	0.00140863	0.0784383	-1.06705
10507112	Stil	Scl/Tal1 interrupting locus	ENSMUSG00000028718	0.553509	9.85032	3.46967	0.00141395	0.0784383	-1.07041
10586454	D030028M11Rik	RIKEN cDNA D030028M11 gene	NA	0.552441	8.0337	3.46656	0.00142613	0.0785293	-1.07807
10386604	Shmt1	serine hydroxymethyltransferase 1 (soluble)	ENSMUSG00000020534	0.569728	9.87828	3.46589	0.00142876	0.0785293	-1.07972
10393944	Rfng	RFNG O-fucosylpeptide 3-beta-N-acetylglucosaminyltransferase	ENSMUSG00000025158	-0.535197	8.66705	-3.46368	0.00143748	0.0786462	-1.08515
10346594	Cdk15	cyclin-dependent kinase 15	ENSMUSG00000026023	-0.541228	8.79778	-3.4608	0.00144894	0.0788223	-1.09224
10537712	Gstk1	glutathione S-transferase kappa 1	ENSMUSG00000029864	-0.516786	9.30912	-3.45928	0.00145498	0.0788223	-1.09595
10413803	Btd	biotinidase	ENSMUSG00000021900	-0.515449	8.54131	-3.45765	0.00146152	0.0788223	-1.09995
10550217	Crxos1	Crx opposite strand transcript 1	ENSMUSG00000074365	0.526219	5.63205	3.45626	0.00146714	0.0788223	-1.10338
10607116	Ammecr1	Alport syndrome, mental retardation, midface hypoplasia and elliptocytosis chromosomal region gene 1 homolog (human)	ENSMUSG00000042225	-0.58093	10.0984	-3.44671	0.00150619	0.0805573	-1.12682
10556133	Styx	serine/threonine/tyrosine interaction protein	c(\ENSMUSG00000053205\", \"ENSMUSG00000071748\")"	-0.518353	9.57024	-3.44493	0.00151354	0.0805893	-1.13117
10446074	Uhrf1	ubiquitin-like, containing PHD and RING finger domains, 1	ENSMUSG00000001228	0.54805	10.4438	3.44271	0.0015228	0.0807222	-1.13661
10504470	Melk	maternal embryonic leucine zipper kinase	ENSMUSG00000035683	0.55783	9.47758	3.44032	0.00153282	0.0808937	-1.14246
10504094	Galt	galactose-1-phosphate uridyl transferase	ENSMUSG00000036073	-0.60999	10.257	-3.43578	0.00155205	0.0815475	-1.15358
10575750	Bcmo1	beta-carotene 15,15'-monooxygenase	ENSMUSG00000031845	-0.594948	8.46489	-3.42869	0.00158256	0.0824467	-1.17095
10496204	Cenpe	centromere protein E	ENSMUSG00000045328	0.585611	10.0082	3.42859	0.00158299	0.0824467	-1.17119
10574985	Slc7a6	solute carrier family 7 (cationic amino acid transporter, y+ system), member 6	ENSMUSG00000031904	-0.523016	11.969	-3.42547	0.00159659	0.0825627	-1.17882
10405280	Arl10	ADP-ribosylation factor-like 10	ENSMUSG00000025870	-0.599103	9.08744	-3.42425	0.00160192	0.0825627	-1.1818
10539632	Alms1	Alstrom syndrome 1 homolog (human)	ENSMUSG00000063810	0.522102	7.87938	3.42333	0.00160598	0.0825627	-1.18406
10526181	Gatsl2	GATS protein-like 2	ENSMUSG00000015944	-0.608956	9.21893	-3.42088	0.00161679	0.0827614	-1.19004
10571680	Mlf1ip	myeloid leukemia factor 1 interacting protein	ENSMUSG00000031629	0.523237	9.93148	3.41168	0.00165802	0.0832099	-1.21249
10503617	Mms22l	MMS22-like, DNA repair protein	ENSMUSG00000045751	0.538804	8.71961	3.40958	0.00166762	0.0832099	-1.21764
10442231	3110052M02Rik	RIKEN cDNA 3110052M02 gene	ENSMUSG00000035868	-0.585197	8.66384	-3.40853	0.00167238	0.0832099	-1.22018
10363921	Pcdh15	protocadherin 15	ENSMUSG00000052613	-0.528204	8.35186	-3.40708	0.00167906	0.0832099	-1.22373
10499536	Efna1	ephrin A1	ENSMUSG00000027954	-0.574716	7.97469	-3.40608	0.00168367	0.0832099	-1.22618
10399540	Pqlc3	PQ loop repeat containing	ENSMUSG00000045679	-0.587354	9.61396	-3.40586	0.00168464	0.0832099	-1.2267
10492402	Kcnab1	potassium voltage-gated channel, shaker-related subfamily, beta member 1	ENSMUSG00000027827	0.507647	10.8169	3.40538	0.00168689	0.0832099	-1.22788
10571870	Hmgb2	high mobility group box 2	ENSMUSG00000054717	0.543267	11.4117	3.40537	0.00168694	0.0832099	-1.22791
10452980	Eif2ak2	eukaryotic translation initiation factor 2-alpha kinase 2	ENSMUSG00000024079	-0.561104	8.8099	-3.40506	0.00168834	0.0832099	-1.22865
10516007	Zmpste24	zinc metallopeptidase, STE24 homolog (S. cerevisiae)	ENSMUSG00000043207	-0.604096	10.8089	-3.39438	0.00173838	0.084908	-1.25469
10394488	Matn3	matrilin 3	ENSMUSG00000020583	0.503428	8.18252	3.39205	0.00174945	0.084908	-1.26034
10564978	Blm	Bloom syndrome, RecQ helicase-like	ENSMUSG00000030528	0.533025	10.4086	3.39155	0.00175188	0.084908	-1.26158
10357917	Tmem183a	transmembrane protein 183A	ENSMUSG00000042305	-0.510099	10.7499	-3.38638	0.00177677	0.084908	-1.27415
10448506	Ccnf	cyclin F	ENSMUSG00000072082	0.531763	10.5213	3.38608	0.00177822	0.084908	-1.27488
10583402	Zfp317	zinc finger protein 317	ENSMUSG00000057551	-0.513572	9.84252	-3.38459	0.00178545	0.084908	-1.27849
10366956	Stat6	signal transducer and activator of transcription 6	ENSMUSG00000002147	-0.517403	9.99444	-3.38357	0.00179043	0.084908	-1.28098
10366983	Tmem194	transmembrane protein 194	ENSMUSG00000040195	0.513128	10.517	3.38294	0.00179352	0.084908	-1.28251
10369704	Hnrnph3	heterogeneous nuclear ribonucleoprotein H3	ENSMUSG00000020069	0.511508	10.5187	3.38178	0.00179921	0.084908	-1.28533
10462912	Lgi1	leucine-rich repeat LGI family, member 1	ENSMUSG00000067242	-0.583987	11.1471	-3.38093	0.00180339	0.084908	-1.2874
10428763	Atad2	ATPase family, AAA domain containing 2	ENSMUSG00000022360	0.517907	10.9907	3.38021	0.00180691	0.084908	-1.28914
10505517	Tlr4	toll-like receptor 4	ENSMUSG00000039005	-0.52063	6.46517	-3.37881	0.00181387	0.084908	-1.29256
10534102	Gusb	glucuronidase, beta	ENSMUSG00000025534	-0.507912	10.5997	-3.37851	0.00181534	0.084908	-1.29328
10356240	Slc16a14	solute carrier family 16 (monocarboxylic acid transporters), member 14	ENSMUSG00000026220	0.629388	8.7971	3.36244	0.00189661	0.0882721	-1.33229
10518350	Hmgb2	high mobility group box 2	ENSMUSG00000054717	0.536069	11.5012	3.36138	0.00190207	0.0882721	-1.33485
10352767	Nek2	NIMA (never in mitosis gene a)-related expressed kinase 2	ENSMUSG00000026622	0.530102	10.9823	3.35235	0.00194938	0.0899811	-1.35673
10451004	Cd2ap	CD2-associated protein	ENSMUSG00000061665	-0.504896	11.5017	-3.35091	0.00195701	0.0899811	-1.3602
10409799	Isca1	iron-sulfur cluster assembly 1 homolog (S. cerevisiae)	ENSMUSG00000044792	-0.50141	9.89637	-3.34975	0.00196319	0.0899811	-1.36301
10502146	Gar1	GAR1 ribonucleoprotein homolog (yeast)	ENSMUSG00000028010	0.518435	11.6779	3.34667	0.00197969	0.0899811	-1.37046
10603135	Fancb	Fanconi anemia, complementation group B	ENSMUSG00000047757	0.541616	8.97308	3.34646	0.00198085	0.0899811	-1.37098
10415678	Cab39l	calcium binding protein 39-like	ENSMUSG00000021981	-0.499726	10.2093	-3.34441	0.00199188	0.0899811	-1.37592
10475211	Haus2	HAUS augmin-like complex, subunit 2	ENSMUSG00000027285	0.515264	9.77607	3.3443	0.00199248	0.0899811	-1.3762
10487945	Gpcpd1	glycerophosphocholine phosphodiesterase GDE1 homolog (S. cerevisiae)	ENSMUSG00000027346	0.513683	10.7704	3.34305	0.00199924	0.0899811	-1.37921
10497520	Ect2	ect2 oncogene	ENSMUSG00000027699	0.53015	11.5672	3.34148	0.00200779	0.0900259	-1.38301
10465912	Fen1	flap structure specific endonuclease 1	ENSMUSG00000024742	0.557115	9.57913	3.33972	0.00201743	0.0900684	-1.38727
10576173	Gm16378	predicted gene 16378	ENSMUSG00000074046	-0.532678	5.40143	-3.33855	0.00202384	0.0900684	-1.39009
10379564	Lig3	ligase III, DNA, ATP-dependent	ENSMUSG00000020697	-0.503846	9.93552	-3.3337	0.00205065	0.0907643	-1.4018
10596200	Tmem108	transmembrane protein 108	ENSMUSG00000042757	-0.526965	11.0429	-3.33275	0.00205597	0.0907643	-1.40411
10430974	Arfgap3	ADP-ribosylation factor GTPase activating protein 3	ENSMUSG00000054277	-0.49935	10.2489	-3.33161	0.00206231	0.0907643	-1.40685
10443764	Slc37a1	solute carrier family 37 (glycerol-3-phosphate transporter), member 1	ENSMUSG00000024036	-0.505207	9.86612	-3.32538	0.00209746	0.0919105	-1.42188
10539640	Alms1	Alstrom syndrome 1 homolog (human)	ENSMUSG00000063810	0.503857	7.7974	3.32427	0.00210376	0.0919105	-1.42455
10504450	Glipr2	GLI pathogenesis-related 2	ENSMUSG00000028480	-0.498301	10.5665	-3.31399	0.0021632	0.0941625	-1.44934
10465861	Incenp	inner centromere protein	ENSMUSG00000024660	0.526628	10.3403	3.30855	0.00219528	0.0944974	-1.46242
10474769	Bub1b	budding uninhibited by benzimidazoles 1 homolog, beta (S. cerevisiae)	ENSMUSG00000040084	0.532555	10.8827	3.30715	0.00220357	0.0944974	-1.46578
10518352	Hmgb2	high mobility group box 2	ENSMUSG00000054717	0.517555	11.3495	3.30576	0.0022119	0.0944974	-1.46913
10446027	Chaf1a	chromatin assembly factor 1, subunit A (p150)	ENSMUSG00000002835	0.516014	9.22698	3.30509	0.00221591	0.0944974	-1.47074
10546432	Adamts9	a disintegrin-like and metallopeptidase (reprolysin type) with thrombospondin type 1 motif, 9	ENSMUSG00000030022	0.511381	6.86278	3.30472	0.00221814	0.0944974	-1.47164
10593449	Layn	layilin	ENSMUSG00000060594	-0.6271	9.52613	-3.30467	0.00221843	0.0944974	-1.47175
10427235	Prr13	proline rich 13	ENSMUSG00000023048	-0.632599	10.8277	-3.29952	0.00224951	0.09548	-1.48412
10359255	Fam5b	family with sequence similarity 5, member B	ENSMUSG00000004031	-0.67169	9.4584	-3.28167	0.00236058	0.0997113	-1.52695
10364478	Hcn2	hyperpolarization-activated, cyclic nucleotide-gated K+ 2	ENSMUSG00000020331	0.514043	10.1766	3.28037	0.00236883	0.0997113	-1.53006
10607467	Sat1	spermidine/spermine N1-acetyl transferase 1	ENSMUSG00000025283	-0.534263	10.6554	-3.27952	0.00237428	0.0997113	-1.53209

## Sheet: GO analysis Transient DALI KD
GO_ID	LEVEL(S)	TERM	NB_IN_REF	FREQ_IN_REF	NB_IN_SET	FREQ_IN_SET	P_VALUE	ENRICHMENT/DEPLETION	GENES_IN_SET
GO:0006259	6,5	DNA metabolic process	388	0.0265	35	0.1733	4.55072e-19	E	Tdg,Chek1,Fen1,Cdc6,Neil3,Esco2,Nasp,Mcm3,Gins1,Rad54l,Pold4,Mcm5,Blm,Mcm10,Fancb,Fanci,Pola1,Hells,Fancd2,Usp1,Trip13,Chaf1a,Brip1,Rad51,Polq,Mcm6,Dtl,Exo1,Stat6,Uhrf1,Rpa2,Mcm4,Rrm2,Lig3,Gen1
GO:0006260	7,6	DNA replication	130	0.0089	18	0.0891	1.8343e-13	E	Fen1,Cdc6,Nasp,Mcm3,Gins1,Pold4,Mcm5,Blm,Mcm10,Pola1,Chaf1a,Polq,Mcm6,Dtl,Rpa2,Mcm4,Rrm2,Lig3
GO:0007049	3	cell cycle	640	0.0437	35	0.1733	1.74152e-12	E	Espl1,Chek1,Cdc6,Esco2,Nasp,Nek2,Mcm3,Incenp,Wee1,Ccnf,Cd2ap,Kif11,Zwilch,Bub1b,Kif20b,Fanci,Oip5,Hells,Anp32b,Fancd2,Haus2,Trip13,Chaf1a,Rad51,Cenpe,6720463M24Rik,E2f2,Plk3,Mcm6,Exo1,Kntc1,Uhrf1,Lig3,Ccng1,Fbxo5
GO:0022403	5,4	cell cycle phase	324	0.0221	25	0.1238	2.4045e-12	E	Espl1,Chek1,Cdc6,Nek2,Incenp,Wee1,Ccnf,Cd2ap,Kif11,Zwilch,Bub1b,Kif20b,Oip5,Hells,Anp32b,Fancd2,Haus2,Trip13,Rad51,Cenpe,6720463M24Rik,Exo1,Kntc1,Ccng1,Fbxo5
GO:0000279	6,5	M phase	284	0.0194	23	0.1139	7.13962e-12	E	Espl1,Cdc6,Nek2,Incenp,Wee1,Ccnf,Cd2ap,Kif11,Zwilch,Bub1b,Kif20b,Oip5,Hells,Fancd2,Haus2,Trip13,Rad51,Cenpe,6720463M24Rik,Exo1,Kntc1,Ccng1,Fbxo5
GO:0006281	7,6	DNA repair	213	0.0145	20	0.099	1.24262e-11	E	Tdg,Chek1,Fen1,Neil3,Esco2,Rad54l,Blm,Fancb,Fanci,Fancd2,Usp1,Trip13,Chaf1a,Brip1,Rad51,Polq,Exo1,Uhrf1,Lig3,Gen1
GO:0006974	4	response to DNA damage stimulus	273	0.0186	22	0.1089	2.30001e-11	E	Tdg,Chek1,Fen1,Neil3,Esco2,Rad54l,Blm,Fancb,Fanci,Fancd2,Usp1,Trip13,Chaf1a,Brip1,Rad51,Polq,Dtl,Exo1,Atad5,Uhrf1,Lig3,Gen1
GO:0033554	4	cellular response to stress	376	0.0256	25	0.1238	5.94812e-11	E	Tdg,Chek1,Fen1,Neil3,Esco2,Hipk3,Rad54l,Blm,Fancb,Fanci,Fancd2,Usp1,Trip13,Chaf1a,Brip1,Rad51,Cdc42ep5,Polq,Exo1,Uhrf1,Lig3,Tlr4,Eif2ak2,Cbs,Gen1
GO:0022402	4,3	cell cycle process	377	0.0257	25	0.1238	6.29162e-11	E	Espl1,Chek1,Cdc6,Nek2,Incenp,Wee1,Ccnf,Cd2ap,Kif11,Zwilch,Bub1b,Kif20b,Oip5,Hells,Anp32b,Fancd2,Haus2,Trip13,Rad51,Cenpe,6720463M24Rik,Exo1,Kntc1,Ccng1,Fbxo5
GO:0051301	3	cell division	267	0.0182	21	0.104	1.04699e-10	E	Cdc6,Nek2,Incenp,Wee1,Ccnf,Mcm5,Cd2ap,Kif11,Zwilch,Bub1b,Kif20b,Oip5,Hells,Cdca7,Haus2,Cenpe,6720463M24Rik,Kntc1,Lig3,Ccng1,Fbxo5
GO:0000280	5	nuclear division	191	0.013	18	0.0891	1.28664e-10	E	Cdc6,Nek2,Incenp,Wee1,Ccnf,Cd2ap,Kif11,Zwilch,Bub1b,Kif20b,Oip5,Hells,Haus2,Cenpe,6720463M24Rik,Kntc1,Ccng1,Fbxo5
GO:0007067	6,8,7,5	mitosis	191	0.013	18	0.0891	1.28664e-10	E	Cdc6,Nek2,Incenp,Wee1,Ccnf,Cd2ap,Kif11,Zwilch,Bub1b,Kif20b,Oip5,Hells,Haus2,Cenpe,6720463M24Rik,Kntc1,Ccng1,Fbxo5
GO:0034984	5	cellular response to DNA damage stimulus	243	0.0166	20	0.099	1.33129e-10	E	Tdg,Chek1,Fen1,Neil3,Esco2,Rad54l,Blm,Fancb,Fanci,Fancd2,Usp1,Trip13,Chaf1a,Brip1,Rad51,Polq,Exo1,Uhrf1,Lig3,Gen1
GO:0000087	7,5,6	M phase of mitotic cell cycle	192	0.0131	18	0.0891	1.40169e-10	E	Cdc6,Nek2,Incenp,Wee1,Ccnf,Cd2ap,Kif11,Zwilch,Bub1b,Kif20b,Oip5,Hells,Haus2,Cenpe,6720463M24Rik,Kntc1,Ccng1,Fbxo5
GO:0048285	4	organelle fission	195	0.0133	18	0.0891	1.80652e-10	E	Cdc6,Nek2,Incenp,Wee1,Ccnf,Cd2ap,Kif11,Zwilch,Bub1b,Kif20b,Oip5,Hells,Haus2,Cenpe,6720463M24Rik,Kntc1,Ccng1,Fbxo5
GO:0051716	3	cellular response to stimulus	468	0.0319	27	0.1337	2.33164e-10	E	Tdg,Chek1,Fen1,Neil3,Esco2,Hipk3,Rad54l,Blm,Stxbp4,Fancb,Fanci,Fancd2,Usp1,Trip13,Chaf1a,Brip1,Rad51,Cdc42ep5,Polq,Exo1,Uhrf1,Dicer1,Lig3,Tlr4,Eif2ak2,Cbs,Gen1
GO:0000278	4	mitotic cell cycle	255	0.0174	20	0.099	3.11586e-10	E	Chek1,Cdc6,Nek2,Incenp,Wee1,Ccnf,Cd2ap,Kif11,Zwilch,Bub1b,Kif20b,Oip5,Hells,Anp32b,Haus2,Cenpe,6720463M24Rik,Kntc1,Ccng1,Fbxo5
GO:0006950	3	response to stress	1086	0.0741	35	0.1733	1.23107e-06	E	Anxa5,Tdg,Chek1,Fen1,Neil3,Esco2,H60a,Hipk3,Rad54l,P2rx3,Scn9a,Blm,Fancb,Fanci,Fancd2,Usp1,Trip13,Chaf1a,Brip1,Creb3l2,Rad51,Cdc42ep5,Pdia5,Polq,Dtl,Exo1,Anxa2,Atad5,Uhrf1,Lig3,Tlr4,Eif2ak2,Cbs,Gen1,Ptgs1
GO:0006270	9,7,8,6	DNA replication initiation	12	0.0008	4	0.0198	1.55426e-05	E	Mcm3,Mcm5,Mcm6,Mcm4
GO:0006996	3	organelle organization	1002	0.0684	29	0.1436	6.78469e-05	E	Hist1h1d,Espl1,Cdc6,Hist1h2bc,Pcdh15,Nasp,Nek2,Incenp,Wee1,Ccnf,Rad54l,Cd2ap,Kif11,Blm,Zwilch,Bub1b,Kif20b,Oip5,Hells,Fancd2,Haus2,Cenpe,6720463M24Rik,Hist1h2bg,Zmpste24,Kntc1,Ccng1,Hist1h1c,Fbxo5
GO:0007127	9,7,6,8,5	meiosis I	35	0.0024	5	0.0248	0.0001023	E	Espl1,Fancd2,Trip13,Rad51,Fbxo5
GO:0006310	7,6	DNA recombination	86	0.0059	7	0.0347	0.0001581	E	Rad54l,Blm,Trip13,Rad51,Exo1,Stat6,Lig3
GO:0051491	7,8,6,5	positive regulation of filopodium assembly	2	0.0001	2	0.0099	0.000189	E	Tgfb3,Tgfbr1
GO:0051489	7,6,5	regulation of filopodium assembly	2	0.0001	2	0.0099	0.000189	E	Tgfb3,Tgfbr1
GO:0007126	8,6,7,5	meiosis	93	0.0063	7	0.0347	0.0002537	E	Espl1,Nek2,Fancd2,Trip13,Rad51,Exo1,Fbxo5
GO:0051327	7,5,6	M phase of meiotic cell cycle	93	0.0063	7	0.0347	0.0002537	E	Espl1,Nek2,Fancd2,Trip13,Rad51,Exo1,Fbxo5
GO:0051321	4	meiotic cell cycle	94	0.0064	7	0.0347	0.0002705	E	Espl1,Nek2,Fancd2,Trip13,Rad51,Exo1,Fbxo5
GO:0016043	2	cellular component organization	1801	0.1229	41	0.203	0.0003705	E	Hist1h1d,Espl1,Ache,Kazald1,Alms1,Cdc6,Hist1h2bc,Pcdh15,Nasp,Nek2,Incenp,Wee1,Ccnf,Rad54l,Cd2ap,Kif11,Blm,Zwilch,Bub1b,Efna1,Kif20b,Oip5,Hells,Fancd2,Haus2,Tgfb3,Ect2,Cdc42ep5,Cenpe,6720463M24Rik,Tgfbi,Cdc42se2,Tgfbr1,Hist1h2bg,Anxa2,Zmpste24,Kntc1,Rrm2,Ccng1,Hist1h1c,Fbxo5
GO:0016584	5,6,8,7	nucleosome positioning	3	0.0002	2	0.0099	0.0005591	E	Hist1h1d,Hist1h1c
GO:0006261	8,7	DNA-dependent DNA replication	30	0.002	4	0.0198	0.0006734	E	Mcm3,Mcm5,Mcm6,Mcm4
GO:0007144	10,8,5,9,7,4	female meiosis I	4	0.0003	2	0.0099	0.001103	E	Trip13,Fbxo5
GO:0042439	7	ethanolamine and derivative metabolic process	5	0.0003	2	0.0099	0.0018133	E	Ache,Etnk2
GO:0006563	7,8	L-serine metabolic process	6	0.0004	2	0.0099	0.0026828	E	Shmt1,Cbs
GO:0050896	2	response to stimulus	2216	0.1512	44	0.2178	0.002792	E	Anxa5,Tdg,Chek1,Fen1,Neil3,Esco2,Pcdh15,H60a,Hmgb2,Hipk3,Rad54l,P2rx3,Cnga3,Scn9a,Blm,Stxbp4,Fancb,Fanci,Fancd2,Usp1,Ddc,Trip13,Chaf1a,Brip1,Creb3l2,Rad51,Cdc42ep5,Pdia5,Polq,Tgfbr1,Dtl,Enpp1,Exo1,Anxa2,Atad5,Stat6,Uhrf1,Dicer1,Lig3,Tlr4,Eif2ak2,Cbs,Gen1,Ptgs1
GO:0006807	3	nitrogen compound metabolic process	317	0.0216	11	0.0545	0.0030515	E	Gfpt1,Ache,Shmt1,H60a,Ass1,Ddc,Btd,Sat1,Etnk2,Sgpp1,Cbs
GO:0006811	4,5	ion transport	682	0.0465	18	0.0891	0.00349	E	Hcn2,Slc39a9,Slc31a2,P2rx3,Vdr,Cnga3,Scn9a,Kcnab1,Slc41a2,Slc30a4,Trpc7,Atp6v0e2,Nsf,Kcnn3,Ttyh2,Gria2,Scn3b,Fxyd5
GO:0032508	8,7	DNA duplex unwinding	7	0.0005	2	0.0099	0.0037047	E	Mcm6,Mcm4
GO:0006268	9,8	DNA unwinding during replication	7	0.0005	2	0.0099	0.0037047	E	Mcm6,Mcm4
GO:0044237	3	cellular metabolic process	6119	0.4174	100	0.495	0.0046149	E	Fads3,Zfp667,Fkbp14,Gfpt1,Tdg,Lass6,Chek1,Bhlhe40,Fen1,Mylip,Ache,Shmt1,Usp18,Alms1,Cdc6,Isca1,Gar1,Neil3,Serinc5,Esco2,H60a,Nasp,Nek2,Hmgb2,Mcm3,Hipk3,Gins1,Wee1,Gstk1,Rad54l,Pold4,Echdc2,Vdr,Smpd1,Mcm5,Galt,Blm,Usp51,Mcm10,Bub1b,Fancb,Efna1,Map3k2,Zcchc12,Fanci,Fkbp7,Pola1,Hells,Cdca7,Fancd2,Hey2,Usp1,Zfp317,Mlf1ip,Ass1,Ddc,Tgfb3,Ptprr,Trip13,Pbk,Chaf1a,Pcmtd1,Atp6v0e2,Atad2,Brip1,Retsat,Aebp1,…
GO:0044238	3	primary metabolic process	6264	0.4273	102	0.505	0.0046605	E	Fads3,Zfp667,Espl1,Fkbp14,Gfpt1,Tdg,Lass6,Chek1,Bhlhe40,Fen1,Mylip,Ache,Shmt1,Usp18,Alms1,Cdc6,Ctso,Adamts9,Gar1,Neil3,Serinc5,Esco2,Nasp,Nek2,Hmgb2,Mcm3,Hipk3,Gins1,Wee1,Rad54l,Pold4,Echdc2,Vdr,Smpd1,Mcm5,Galt,Blm,Usp51,Mcm10,Bub1b,Fancb,Efna1,Map3k2,Zcchc12,Fanci,Fkbp7,Pola1,Hells,Cdca7,Fancd2,Hey2,Usp1,Zfp317,Mlf1ip,Ass1,Ddc,Tgfb3,Ptprr,Trip13,Pbk,Chaf1a,Pcmtd1,Atp6v0e2,Nsf,Atad2,Brip1,Retsat,…
GO:0032392	7,6	DNA geometric change	8	0.0005	2	0.0099	0.0048721	E	Mcm6,Mcm4
GO:0060491	5,6,4	regulation of cell projection assembly	8	0.0005	2	0.0099	0.0048721	E	Tgfb3,Tgfbr1
GO:0050819	6,4,5	negative regulation of coagulation	8	0.0005	2	0.0099	0.0048721	E	Anxa5,Anxa2
GO:0008152	2	metabolic process	7146	0.4875	114	0.5644	0.005034	E	Fads3,Bcmo1,Pyroxd2,Zfp667,Espl1,Fkbp14,Gfpt1,Tdg,Lass6,Chek1,Bhlhe40,Fen1,Mylip,Ache,Shmt1,Usp18,Alms1,Cdc6,Ctso,Isca1,Adamts9,Gar1,Neil3,Serinc5,Esco2,H60a,Nasp,Nek2,Hmgb2,Mcm3,Hipk3,Gins1,Wee1,Gstk1,Rad54l,Pold4,Echdc2,Vdr,Smpd1,Mcm5,Galt,Blm,Usp51,Mcm10,Bub1b,Fancb,Efna1,Kcnab1,Map3k2,Zcchc12,Fanci,Fkbp7,Pola1,Hells,Cdca7,Fancd2,Hey2,Usp1,Zfp317,Mlf1ip,Ass1,Ddc,Tgfb3,Ptprr,Trip13,Pbk,Chaf1a,P…
GO:0006302	8,7	double-strand break repair	27	0.0018	3	0.0149	0.0054309	E	Rad54l,Trip13,Rad51
GO:0006812	5,6	cation transport	499	0.034	14	0.0693	0.005462	E	Hcn2,Slc39a9,Slc31a2,P2rx3,Vdr,Scn9a,Kcnab1,Slc41a2,Slc30a4,Trpc7,Atp6v0e2,Nsf,Kcnn3,Scn3b
GO:0007018	4	microtubule-based movement	86	0.0059	5	0.0248	0.0054871	E	Kif15,Kif11,Kif20b,Cenpe,Kif2c
GO:0007254	9,8,7,6	JNK cascade	54	0.0037	4	0.0198	0.005602	E	Hipk3,Cdc42ep5,Tlr4,Cbs
GO:0034641	4	cellular nitrogen compound metabolic process	299	0.0204	10	0.0495	0.0056737	E	Gfpt1,Ache,Shmt1,H60a,Ass1,Ddc,Sat1,Etnk2,Sgpp1,Cbs
GO:0001556	6,7,8,5,9	oocyte maturation	9	0.0006	2	0.0099	0.0061787	E	Trip13,Fbxo5
GO:0048266	5,4,6	behavioral response to pain	9	0.0006	2	0.0099	0.0061787	E	P2rx3,Scn9a
GO:0008283	3	cell proliferation	622	0.0424	16	0.0792	0.0066956	E	Serpine1,Alms1,Nasp,Gins1,Cd274,Pold4,Blm,Hells,Cdca7,Hey2,Tgfb3,Sat1,Pgf,Stat6,Uhrf1,Ptgs1
GO:0031098	7,6,5	stress-activated protein kinase signaling pathway	58	0.004	4	0.0198	0.007116	E	Hipk3,Cdc42ep5,Tlr4,Cbs
GO:0044271	5	nitrogen compound biosynthetic process	92	0.0063	5	0.0248	0.0071405	E	H60a,Ass1,Ddc,Etnk2,Cbs
GO:0007017	3	microtubule-based process	174	0.0119	7	0.0347	0.0075986	E	Kif15,Espl1,Kif11,Kif20b,Cenpe,Kif2c,Fbxo5
GO:0034960	5	cellular biopolymer metabolic process	4682	0.3194	78	0.3861	0.0076017	E	Zfp667,Fkbp14,Tdg,Lass6,Chek1,Bhlhe40,Fen1,Mylip,Ache,Usp18,Cdc6,Gar1,Neil3,Esco2,Nasp,Nek2,Hmgb2,Mcm3,Hipk3,Gins1,Wee1,Rad54l,Pold4,Vdr,Mcm5,Blm,Usp51,Mcm10,Bub1b,Fancb,Efna1,Map3k2,Zcchc12,Fanci,Fkbp7,Pola1,Hells,Cdca7,Fancd2,Hey2,Usp1,Zfp317,Mlf1ip,Tgfb3,Ptprr,Trip13,Pbk,Chaf1a,Pcmtd1,Atad2,Brip1,Aebp1,Creb3l2,Rad51,Melk,Polq,E2f2,Plk3,Styx,Fut11,Mcm6,Tgfbr1,Dtl,Ganab,Exo1,Zmpste24,Stat6,Uhrf1…
GO:0007131	10,8,7,5,9,6,4	reciprocal meiotic recombination	10	0.0007	2	0.0099	0.0076179	E	Trip13,Rad51
GO:0006139	4	nucleobase, nucleoside, nucleotide and nucleic acid metabolic process	3112	0.2123	55	0.2723	0.0079783	E	Zfp667,Tdg,Lass6,Chek1,Bhlhe40,Fen1,Cdc6,Gar1,Neil3,Esco2,Nasp,Hmgb2,Mcm3,Hipk3,Gins1,Rad54l,Pold4,Vdr,Mcm5,Blm,Mcm10,Fancb,Zcchc12,Fanci,Pola1,Hells,Cdca7,Fancd2,Hey2,Usp1,Zfp317,Mlf1ip,Tgfb3,Trip13,Chaf1a,Atp6v0e2,Atad2,Brip1,Aebp1,Creb3l2,Rad51,Polq,E2f2,Mcm6,Dtl,Exo1,Stat6,Uhrf1,Rpa2,Nr1d1,Mcm4,Rrm2,Dicer1,Lig3,Gen1
GO:0031497	4,7	chromatin assembly	96	0.0065	5	0.0248	0.0084047	E	Hist1h1d,Hist1h2bc,Hells,Hist1h2bg,Hist1h1c
GO:0034728	5,6,4	nucleosome organization	96	0.0065	5	0.0248	0.0084047	E	Hist1h1d,Hist1h2bc,Nasp,Hist1h2bg,Hist1h1c
GO:0044260	4	cellular macromolecule metabolic process	4788	0.3266	79	0.3911	0.0088433	E	Zfp667,Fkbp14,Tdg,Lass6,Chek1,Bhlhe40,Fen1,Mylip,Ache,Usp18,Cdc6,Gar1,Neil3,Esco2,Nasp,Nek2,Hmgb2,Mcm3,Hipk3,Gins1,Wee1,Rad54l,Pold4,Vdr,Mcm5,Blm,Usp51,Mcm10,Bub1b,Fancb,Efna1,Map3k2,Zcchc12,Fanci,Fkbp7,Pola1,Hells,Cdca7,Fancd2,Hey2,Usp1,Zfp317,Mlf1ip,Tgfb3,Ptprr,Trip13,Pbk,Chaf1a,Pcmtd1,Atad2,Brip1,Aebp1,Creb3l2,Rad51,Melk,Polq,E2f2,Plk3,Styx,Fut11,Mcm6,Tgfbr1,Dtl,Ganab,Exo1,Zmpste24,Stat6,Uhrf1…
GO:0000041	7,8	transition metal ion transport	62	0.0042	4	0.0198	0.0088591	E	Slc39a9,Slc31a2,Slc30a4,Trpc7
GO:0000724	9,8	double-strand break repair via homologous recombination	11	0.0008	2	0.0099	0.0091836	E	Rad54l,Rad51
GO:0000725	8,7	recombinational repair	11	0.0008	2	0.0099	0.0091836	E	Rad54l,Rad51
GO:0009308	5	cellular amine metabolic process	279	0.019	9	0.0446	0.0100055	E	Gfpt1,Ache,Shmt1,Ass1,Ddc,Sat1,Etnk2,Sgpp1,Cbs
GO:0046847	6	filopodium assembly	12	0.0008	2	0.0099	0.0108699	E	Tgfb3,Tgfbr1
GO:0016049	5,3	cell growth	67	0.0046	4	0.0198	0.0113688	E	Kazald1,Igfbp5,Tgfb3,Tro
GO:0009309	6	amine biosynthetic process	68	0.0046	4	0.0198	0.0119155	E	Ass1,Ddc,Etnk2,Cbs
GO:0007143	9,7,8,6	female meiosis	13	0.0009	2	0.0099	0.0126708	E	Trip13,Fbxo5
GO:0051324	7,6,5	prophase	13	0.0009	2	0.0099	0.0126708	E	Trip13,Fbxo5
GO:0007128	10,8,7,9,6	meiotic prophase I	13	0.0009	2	0.0099	0.0126708	E	Trip13,Fbxo5
GO:0030035	5	microspike assembly	13	0.0009	2	0.0099	0.0126708	E	Tgfb3,Tgfbr1
GO:0065008	3	regulation of biological quality	1045	0.0713	22	0.1089	0.0134269	E	Anxa5,Ache,Hcn2,Kazald1,Alms1,Serinc5,Vdr,Blm,Slc30a4,Gpr12,Igfbp5,Tgfb3,Retsat,Kdelr3,Cdc42ep5,Pdia5,Cenpe,Tro,Cdc42se2,Anxa2,Dicer1,Ptgs1
GO:0007059	3	chromosome segregation	38	0.0026	3	0.0149	0.0134723	E	Espl1,Nek2,Cenpe
GO:0030031	4	cell projection assembly	71	0.0048	4	0.0198	0.0136453	E	Alms1,Pcdh15,Tgfb3,Tgfbr1
GO:0070430	9,13,14,7,12,8,15,11,10,5,6	positive regulation of nucleotide-binding oligomerization domain containing 1 signaling pathway	1	0.0001	1	0.005	0.0137799	E	Tlr4
GO:0007057	6,9,11,10,8,5	spindle assembly involved in female meiosis I	1	0.0001	1	0.005	0.0137799	E	Fbxo5
GO:0019343	9,10,8	cysteine biosynthetic process via cystathionine	1	0.0001	1	0.005	0.0137799	E	Cbs
GO:0006535	9,8,10	cysteine biosynthetic process from serine	1	0.0001	1	0.005	0.0137799	E	Cbs
GO:0051440	7,5,4	regulation of ubiquitin-protein ligase activity during meiotic cell cycle	1	0.0001	1	0.005	0.0137799	E	Fbxo5
GO:0045212	7,8,6	neurotransmitter receptor biosynthetic process	1	0.0001	1	0.005	0.0137799	E	Ache
GO:0006580	5,8	ethanolamine metabolic process	1	0.0001	1	0.005	0.0137799	E	Etnk2
GO:0006646	7,9,10,8,6	phosphatidylethanolamine biosynthetic process	1	0.0001	1	0.005	0.0137799	E	Etnk2
GO:0046337	6,7	phosphatidylethanolamine metabolic process	1	0.0001	1	0.005	0.0137799	E	Etnk2
GO:0007056	5,8,10,9,7	spindle assembly involved in female meiosis	1	0.0001	1	0.005	0.0137799	E	Fbxo5
GO:0030422	12,11,9,8,5,7,10,6	RNA interference, production of siRNA	1	0.0001	1	0.005	0.0137799	E	Dicer1
GO:0070432	13,8,12,6,14,7,11,9,5	regulation of nucleotide-binding oligomerization domain containing 2 signaling pathway	1	0.0001	1	0.005	0.0137799	E	Tlr4
GO:0070426	8,12,13,6,11,7,14,10,9,4,5	positive regulation of nucleotide-binding oligomerization domain containing signaling pathway	1	0.0001	1	0.005	0.0137799	E	Tlr4
GO:0060558	7	regulation of calcidiol 1-monooxygenase activity	1	0.0001	1	0.005	0.0137799	E	Vdr
GO:0070424	12,7,11,5,13,6,10,8,4	regulation of nucleotide-binding oligomerization domain containing signaling pathway	1	0.0001	1	0.005	0.0137799	E	Tlr4
GO:0051984	6,4,5	positive regulation of chromosome segregation	1	0.0001	1	0.005	0.0137799	E	Cenpe
GO:0051987	8,7,9,10,11,6,5	positive regulation of attachment of spindle microtubules to kinetochore	1	0.0001	1	0.005	0.0137799	E	Cenpe
GO:0070434	9,13,14,7,12,8,15,11,10,5,6	positive regulation of nucleotide-binding oligomerization domain containing 2 signaling pathway	1	0.0001	1	0.005	0.0137799	E	Tlr4
GO:0046335	6,8,9,7	ethanolamine biosynthetic process	1	0.0001	1	0.005	0.0137799	E	Etnk2
GO:0051442	8,6,5	negative regulation of ubiquitin-protein ligase activity during meiotic cell cycle	1	0.0001	1	0.005	0.0137799	E	Fbxo5
GO:0030327	10,8,9	prenylated protein catabolic process	1	0.0001	1	0.005	0.0137799	E	Zmpste24
GO:0043486	6,9,7,5	histone exchange	1	0.0001	1	0.005	0.0137799	E	Nasp
GO:0006581	7,9,10,8,6	acetylcholine catabolic process	1	0.0001	1	0.005	0.0137799	E	Ache
GO:0032800	5	receptor biosynthetic process	1	0.0001	1	0.005	0.0137799	E	Ache
GO:0070428	13,8,12,6,14,7,11,9,5	regulation of nucleotide-binding oligomerization domain containing 1 signaling pathway	1	0.0001	1	0.005	0.0137799	E	Tlr4
GO:0045842	9,8,7,10,11,6,5	positive regulation of mitotic metaphase/anaphase transition	1	0.0001	1	0.005	0.0137799	E	Cenpe
GO:0046328	9,8,7,10,6	regulation of JNK cascade	39	0.0027	3	0.0149	0.0143964	E	Hipk3,Tlr4,Cbs
GO:0006519	4	cellular amino acid and derivative metabolic process	249	0.017	8	0.0396	0.0145139	E	Gfpt1,Ache,Shmt1,Ass1,Ddc,Sat1,Etnk2,Cbs
GO:0018107	10,8,9	peptidyl-threonine phosphorylation	14	0.001	2	0.0099	0.0145807	E	Hipk3,Pbk
GO:0018210	9,8	peptidyl-threonine modification	14	0.001	2	0.0099	0.0145807	E	Hipk3,Pbk
GO:0043283	4	biopolymer metabolic process	5146	0.351	82	0.4059	0.0152645	E	Zfp667,Espl1,Fkbp14,Tdg,Lass6,Chek1,Bhlhe40,Fen1,Mylip,Ache,Usp18,Cdc6,Ctso,Adamts9,Gar1,Neil3,Esco2,Nasp,Nek2,Hmgb2,Mcm3,Hipk3,Gins1,Wee1,Rad54l,Pold4,Vdr,Mcm5,Blm,Usp51,Mcm10,Bub1b,Fancb,Efna1,Map3k2,Zcchc12,Fanci,Fkbp7,Pola1,Hells,Cdca7,Fancd2,Hey2,Usp1,Zfp317,Mlf1ip,Tgfb3,Ptprr,Trip13,Pbk,Chaf1a,Pcmtd1,Nsf,Atad2,Brip1,Aebp1,Creb3l2,Rad51,Melk,Polq,E2f2,Plk3,Styx,Fut11,Mcm6,Tgfbr1,Dtl,Ganab,Ex…
GO:0070302	7,6,8,5	regulation of stress-activated protein kinase signaling pathway	40	0.0027	3	0.0149	0.0153518	E	Hipk3,Tlr4,Cbs
GO:0022607	3	cellular component assembly	467	0.0319	12	0.0594	0.0157269	E	Hist1h1d,Ache,Alms1,Hist1h2bc,Pcdh15,Hells,Tgfb3,Tgfbr1,Hist1h2bg,Rrm2,Hist1h1c,Fbxo5
GO:0006323	3	DNA packaging	115	0.0078	5	0.0248	0.0162891	E	Hist1h1d,Hist1h2bc,Hells,Hist1h2bg,Hist1h1c
GO:0009994	5,7,6	oocyte differentiation	15	0.001	2	0.0099	0.0165942	E	Trip13,Fbxo5
GO:0048599	6,7,8,5	oocyte development	15	0.001	2	0.0099	0.0165942	E	Trip13,Fbxo5
GO:0045598	6,5	regulation of fat cell differentiation	15	0.001	2	0.0099	0.0165942	E	Alms1,Enpp1
GO:0051052	7,6,5	regulation of DNA metabolic process	42	0.0029	3	0.0149	0.0173556	E	Blm,Hells,Stat6
GO:0010926	2	anatomical structure formation	775	0.0529	17	0.0842	0.0182877	E	Serpine1,Hist1h1d,Ache,Alms1,Hist1h2bc,Pcdh15,Hells,Tgfb3,Stil,Pgf,Tgfbr1,Hist1h2bg,Anxa2,Rrm2,Dicer1,Hist1h1c,Fbxo5
GO:0007051	6,7,5	spindle organization	16	0.0011	2	0.0099	0.0187058	E	Espl1,Fbxo5
GO:0030001	6,7	metal ion transport	431	0.0294	11	0.0545	0.0202305	E	Hcn2,Slc39a9,Slc31a2,Vdr,Scn9a,Kcnab1,Slc30a4,Trpc7,Nsf,Kcnn3,Scn3b
GO:0006576	6	biogenic amine metabolic process	81	0.0055	4	0.0198	0.0203796	E	Ache,Ddc,Sat1,Etnk2
GO:0043170	3	macromolecule metabolic process	5310	0.3622	83	0.4109	0.0204573	E	Zfp667,Espl1,Fkbp14,Tdg,Lass6,Chek1,Bhlhe40,Fen1,Mylip,Ache,Usp18,Cdc6,Ctso,Adamts9,Gar1,Neil3,Esco2,Nasp,Nek2,Hmgb2,Mcm3,Hipk3,Gins1,Wee1,Rad54l,Pold4,Vdr,Mcm5,Blm,Usp51,Mcm10,Bub1b,Fancb,Efna1,Map3k2,Zcchc12,Fanci,Fkbp7,Pola1,Hells,Cdca7,Fancd2,Hey2,Usp1,Zfp317,Mlf1ip,Tgfb3,Ptprr,Trip13,Pbk,Chaf1a,Pcmtd1,Nsf,Atad2,Brip1,Aebp1,Creb3l2,Rad51,Melk,Polq,E2f2,Plk3,Styx,Fut11,Mcm6,Tgfbr1,Dtl,Ganab,Ex…
GO:0006333	6	chromatin assembly or disassembly	123	0.0084	5	0.0248	0.0205617	E	Hist1h1d,Hist1h2bc,Hells,Hist1h2bg,Hist1h1c
GO:0050818	5,4	regulation of coagulation	17	0.0012	2	0.0099	0.0209103	E	Anxa5,Anxa2
GO:0042402	7,6	biogenic amine catabolic process	17	0.0012	2	0.0099	0.0209103	E	Ache,Sat1
GO:0007091	7,9,5,8,6,4	mitotic metaphase/anaphase transition	17	0.0012	2	0.0099	0.0209103	E	Bub1b,Cenpe
GO:0032507	6,5,4	maintenance of protein location in cell	17	0.0012	2	0.0099	0.0209103	E	Kdelr3,Cenpe
GO:0008361	4	regulation of cell size	82	0.0056	4	0.0198	0.0211337	E	Kazald1,Igfbp5,Tgfb3,Tro
GO:0051276	4	chromosome organization	382	0.0261	10	0.0495	0.0221644	E	Hist1h1d,Hist1h2bc,Nasp,Nek2,Rad54l,Blm,Hells,Fancd2,Hist1h2bg,Hist1h1c
GO:0065004	6,5	protein-DNA complex assembly	126	0.0086	5	0.0248	0.0223084	E	Hist1h1d,Hist1h2bc,Hells,Hist1h2bg,Hist1h1c
GO:0048265	4,5	response to pain	18	0.0012	2	0.0099	0.0232028	E	P2rx3,Scn9a
GO:0043506	10,9,12,8,11,7	regulation of JUN kinase activity	18	0.0012	2	0.0099	0.0232028	E	Hipk3,Cbs
GO:0009058	3	biosynthetic process	3382	0.2307	55	0.2723	0.0243083	E	Fads3,Zfp667,Gfpt1,Lass6,Bhlhe40,Fen1,Ache,Cdc6,Isca1,Serinc5,H60a,Nasp,Hmgb2,Mcm3,Hipk3,Gins1,Pold4,Vdr,Mcm5,Blm,Mcm10,Zcchc12,Pola1,Hells,Cdca7,Hey2,Zfp317,Mlf1ip,Ass1,Ddc,Tgfb3,Chaf1a,Atad2,Brip1,Aebp1,Creb3l2,Polq,E2f2,Etnk2,Fut11,Mcm6,Dtl,Ganab,Stat6,Uhrf1,Rpa2,Nr1d1,Mcm4,Rrm2,Lig3,Dbt,Tlr4,Eif2ak2,Cbs,Ptgs1
GO:0000226	5,4	microtubule cytoskeleton organization	87	0.0059	4	0.0198	0.0251174	E	Espl1,Kif11,Cenpe,Fbxo5
GO:0001558	5,6,4	regulation of cell growth	49	0.0033	3	0.0149	0.0253046	E	Kazald1,Igfbp5,Tro
GO:0009069	6,7	serine family amino acid metabolic process	19	0.0013	2	0.0099	0.0255783	E	Shmt1,Cbs
GO:0022603	5,4	regulation of anatomical structure morphogenesis	180	0.0123	6	0.0297	0.026146	E	Serpine1,Vdr,Efna1,Cdc42ep5,Pgf,Cdc42se2
GO:0040007	2	growth	339	0.0231	9	0.0446	0.0262347	E	Kazald1,Alms1,Pcdh15,Gins1,Igfbp5,Tgfb3,Stil,Tro,Etnk2
GO:0044085	2	cellular component biogenesis	574	0.0392	13	0.0644	0.0266907	E	Hist1h1d,Ache,Alms1,Gar1,Hist1h2bc,Pcdh15,Hells,Tgfb3,Tgfbr1,Hist1h2bg,Rrm2,Hist1h1c,Fbxo5
GO:0046949	7,8,9,6	acyl-CoA biosynthetic process	2	0.0001	1	0.005	0.0271819	E	Dbt
GO:0008291	6,8,9,5	acetylcholine metabolic process	2	0.0001	1	0.005	0.0271819	E	Ache
GO:0000019	9,8,7	regulation of mitotic recombination	2	0.0001	1	0.005	0.0271819	E	Blm
GO:0070723	6	response to cholesterol	2	0.0001	1	0.005	0.0271819	E	Tgfbr1
GO:0051438	6	regulation of ubiquitin-protein ligase activity	2	0.0001	1	0.005	0.0271819	E	Fbxo5
GO:0046208	9,8	spermine catabolic process	2	0.0001	1	0.005	0.0271819	E	Sat1
GO:0051299	9,8,7,6,5	centrosome separation	2	0.0001	1	0.005	0.0271819	E	Kif11
GO:0050973	9,8,7,6	detection of mechanical stimulus involved in equilibrioception	2	0.0001	1	0.005	0.0271819	E	Pcdh15
GO:0031507	5,8	heterochromatin formation	2	0.0001	1	0.005	0.0271819	E	Hells
GO:0002537	8	production of nitric oxide during acute inflammatory response	2	0.0001	1	0.005	0.0271819	E	Tlr4
GO:0043508	11,10,13,9,12,8	negative regulation of JUN kinase activity	2	0.0001	1	0.005	0.0271819	E	Hipk3
GO:0033504	4,5,7,8	floor plate development	2	0.0001	1	0.005	0.0271819	E	Stil
GO:0051352	6	negative regulation of ligase activity	2	0.0001	1	0.005	0.0271819	E	Fbxo5
GO:0006667	8,9	sphinganine metabolic process	2	0.0001	1	0.005	0.0271819	E	Sgpp1
GO:0051988	8,6,7,10,9,5	regulation of attachment of spindle microtubules to kinetochore	2	0.0001	1	0.005	0.0271819	E	Cenpe
GO:0031055	8	chromatin remodeling at centromere	2	0.0001	1	0.005	0.0271819	E	Hells
GO:0016246	11,10,6,9	RNA interference	2	0.0001	1	0.005	0.0271819	E	Dicer1
GO:0019344	8,9,7	cysteine biosynthetic process	2	0.0001	1	0.005	0.0271819	E	Cbs
GO:0034508	7,5,6	centromere complex assembly	2	0.0001	1	0.005	0.0271819	E	Hells
GO:0007100	10,9,8,7,6	mitotic centrosome separation	2	0.0001	1	0.005	0.0271819	E	Kif11
GO:0006668	9,10	sphinganine-1-phosphate metabolic process	2	0.0001	1	0.005	0.0271819	E	Sgpp1
GO:0048295	11,10,7,12,13,9,14,15,6,8	positive regulation of isotype switching to IgE isotypes	2	0.0001	1	0.005	0.0271819	E	Stat6
GO:0045950	10,9,8,7	negative regulation of mitotic recombination	2	0.0001	1	0.005	0.0271819	E	Blm
GO:0051444	7	negative regulation of ubiquitin-protein ligase activity	2	0.0001	1	0.005	0.0271819	E	Fbxo5
GO:0031508	6,8,9,7	centromeric heterochromatin formation	2	0.0001	1	0.005	0.0271819	E	Hells
GO:0050793	4,3	regulation of developmental process	888	0.0606	18	0.0891	0.0272068	E	Serpine1,Alms1,Adamts9,H60a,Vdr,Efna1,Hells,Hey2,Tgfb3,Stil,Cdc42ep5,Cenpe,Pgf,Cdc42se2,Tgfbr1,Enpp1,Stat6,Dicer1
GO:0031344	5,4	regulation of cell projection organization	51	0.0035	3	0.0149	0.0278284	E	Efna1,Tgfb3,Tgfbr1
GO:0031346	6,4,5	positive regulation of cell projection organization	20	0.0014	2	0.0099	0.0280321	E	Tgfb3,Tgfbr1
GO:0051651	5,4,3	maintenance of location in cell	20	0.0014	2	0.0099	0.0280321	E	Kdelr3,Cenpe
GO:0042219	6,5	cellular amino acid derivative catabolic process	20	0.0014	2	0.0099	0.0280321	E	Ache,Sat1
GO:0001824	4,7,8	blastocyst development	52	0.0035	3	0.0149	0.0291299	E	Nasp,Gins1,Tgfbr1
GO:0030199	5	collagen fibril organization	21	0.0014	2	0.0099	0.0305595	E	Tgfbr1,Anxa2
GO:0006334	5,7,6,8	nucleosome assembly	94	0.0064	4	0.0198	0.031268	E	Hist1h1d,Hist1h2bc,Hist1h2bg,Hist1h1c
GO:0044249	4	cellular biosynthetic process	3325	0.2268	53	0.2624	0.0314498	E	Fads3,Zfp667,Lass6,Bhlhe40,Fen1,Cdc6,Isca1,Serinc5,H60a,Nasp,Hmgb2,Mcm3,Hipk3,Gins1,Pold4,Vdr,Mcm5,Blm,Mcm10,Zcchc12,Pola1,Hells,Cdca7,Hey2,Zfp317,Mlf1ip,Ass1,Ddc,Tgfb3,Chaf1a,Atad2,Brip1,Aebp1,Creb3l2,Polq,E2f2,Etnk2,Fut11,Mcm6,Dtl,Ganab,Stat6,Uhrf1,Rpa2,Nr1d1,Mcm4,Rrm2,Lig3,Dbt,Tlr4,Eif2ak2,Cbs,Ptgs1
GO:0080135	5,6,4	regulation of cellular response to stress	54	0.0037	3	0.0149	0.0318092	E	Hipk3,Tlr4,Cbs
GO:0006829	8,9	zinc ion transport	22	0.0015	2	0.0099	0.0331562	E	Slc39a9,Slc30a4
GO:0000018	8,7,6	regulation of DNA recombination	22	0.0015	2	0.0099	0.0331562	E	Blm,Stat6
GO:0042384	5	cilium assembly	22	0.0015	2	0.0099	0.0331562	E	Alms1,Pcdh15
GO:0006665	6,7	sphingolipid metabolic process	55	0.0038	3	0.0149	0.0331859	E	Lass6,Smpd1,Sgpp1
GO:0030198	4	extracellular matrix organization	97	0.0066	4	0.0198	0.0340973	E	Kazald1,Tgfbi,Tgfbr1,Anxa2
GO:0080134	5,4	regulation of response to stress	144	0.0098	5	0.0248	0.0343623	E	H60a,Hipk3,Anxa2,Tlr4,Cbs
GO:0043933	3	macromolecular complex subunit organization	364	0.0248	9	0.0446	0.0357075	E	Hist1h1d,Ache,Hist1h2bc,Nasp,Hells,Hist1h2bg,Rrm2,Hist1h1c,Fbxo5
GO:0006643	5,6	membrane lipid metabolic process	57	0.0039	3	0.0149	0.0360105	E	Lass6,Smpd1,Sgpp1
GO:0000165	8,7	MAPKKK cascade	148	0.0101	5	0.0248	0.0373826	E	Hipk3,Efna1,Cdc42ep5,Tlr4,Cbs
GO:0045185	5,4	maintenance of protein location	24	0.0016	2	0.0099	0.0385399	E	Kdelr3,Cenpe
GO:0006575	5	cellular amino acid derivative metabolic process	102	0.007	4	0.0198	0.0390526	E	Ache,Ddc,Sat1,Etnk2
GO:0009059	4	macromolecule biosynthetic process	2768	0.1888	44	0.2178	0.0397774	E	Zfp667,Lass6,Bhlhe40,Fen1,Ache,Cdc6,Nasp,Hmgb2,Mcm3,Hipk3,Gins1,Pold4,Vdr,Mcm5,Blm,Mcm10,Zcchc12,Pola1,Hells,Cdca7,Hey2,Zfp317,Mlf1ip,Tgfb3,Chaf1a,Atad2,Brip1,Aebp1,Creb3l2,Polq,E2f2,Fut11,Mcm6,Dtl,Ganab,Stat6,Uhrf1,Rpa2,Nr1d1,Mcm4,Rrm2,Lig3,Tlr4,Eif2ak2
GO:0006621	7,6,5	protein retention in ER lumen	3	0.0002	1	0.005	0.0402138	E	Kdelr3
GO:0035196	12,11,9,8,5,7,10,6	gene silencing by miRNA, production of miRNAs	3	0.0002	1	0.005	0.0402138	E	Dicer1
GO:0008608	9,8,5,7	attachment of spindle microtubules to kinetochore	3	0.0002	1	0.005	0.0402138	E	Cenpe
GO:0043032	8,7,6,5	positive regulation of macrophage activation	3	0.0002	1	0.005	0.0402138	E	H60a
GO:0033993	5	response to lipid	3	0.0002	1	0.005	0.0402138	E	Tgfbr1
GO:0000212	7,8,5,4,6	meiotic spindle organization	3	0.0002	1	0.005	0.0402138	E	Espl1
GO:0000320	5,4	re-entry into mitotic cell cycle	3	0.0002	1	0.005	0.0402138	E	Ccnf
GO:0070427	12,11,13,10,8	nucleotide-binding oligomerization domain containing 1 signaling pathway	3	0.0002	1	0.005	0.0402138	E	Tlr4
GO:0043044	8	ATP-dependent chromatin remodeling	3	0.0002	1	0.005	0.0402138	E	Nasp
GO:0044030	8,7,9,10,6	regulation of DNA methylation	3	0.0002	1	0.005	0.0402138	E	Hells
GO:0001919	7,8,6	regulation of receptor recycling	3	0.0002	1	0.005	0.0402138	E	Ache
GO:0050957	7	equilibrioception	3	0.0002	1	0.005	0.0402138	E	Pcdh15
GO:0045746	8,9,7,6	negative regulation of Notch signaling pathway	3	0.0002	1	0.005	0.0402138	E	Hey2
GO:0031050	8,7,4,6,5	dsRNA fragmentation	3	0.0002	1	0.005	0.0402138	E	Dicer1
GO:0032768	6	regulation of monooxygenase activity	3	0.0002	1	0.005	0.0402138	E	Vdr
GO:0051340	5	regulation of ligase activity	3	0.0002	1	0.005	0.0402138	E	Fbxo5
GO:0051313	8,7,4,6	attachment of spindle microtubules to chromosome	3	0.0002	1	0.005	0.0402138	E	Cenpe
GO:0006670	5,8,6,9	sphingosine metabolic process	3	0.0002	1	0.005	0.0402138	E	Sgpp1
GO:0006491	9,7,10,8	N-glycan processing	3	0.0002	1	0.005	0.0402138	E	Ganab
GO:0010216	9,8,10,11,7,6	maintenance of DNA methylation	3	0.0002	1	0.005	0.0402138	E	Hells
GO:0051983	5,4	regulation of chromosome segregation	3	0.0002	1	0.005	0.0402138	E	Cenpe
GO:0006926	6	virus-infected cell apoptosis	3	0.0002	1	0.005	0.0402138	E	Eif2ak2
GO:0070431	12,11,13,10,8	nucleotide-binding oligomerization domain containing 2 signaling pathway	3	0.0002	1	0.005	0.0402138	E	Tlr4
GO:0006312	8,7	mitotic recombination	3	0.0002	1	0.005	0.0402138	E	Blm
GO:0006828	8,9	manganese ion transport	3	0.0002	1	0.005	0.0402138	E	Trpc7
GO:0045359	9,8,10,7,6	positive regulation of interferon-beta biosynthetic process	3	0.0002	1	0.005	0.0402138	E	Tlr4
GO:0035195	11,10,6,9	gene silencing by miRNA	3	0.0002	1	0.005	0.0402138	E	Dicer1
GO:0045143	10,8,7,5,9,6,4	homologous chromosome segregation	3	0.0002	1	0.005	0.0402138	E	Espl1
GO:0070423	11,10,12,9,7	nucleotide-binding oligomerization domain containing signaling pathway	3	0.0002	1	0.005	0.0402138	E	Tlr4
GO:0045190	7,12,11,10,9,8,6	isotype switching	25	0.0017	2	0.0099	0.0413187	E	Exo1,Stat6
GO:0002204	11,10,9,8,7,6	somatic recombination of immunoglobulin genes during immune response	25	0.0017	2	0.0099	0.0413187	E	Exo1,Stat6
GO:0002208	8,9,7,10,6,5	somatic diversification of immunoglobulins during immune response	25	0.0017	2	0.0099	0.0413187	E	Exo1,Stat6
GO:0048514	6,7,8,5	blood vessel morphogenesis	206	0.0141	6	0.0297	0.0416484	E	Serpine1,Hey2,Pgf,Tgfbr1,Anxa2,Dicer1
GO:0042127	5,4	regulation of cell proliferation	442	0.0302	10	0.0495	0.0429296	E	Serpine1,Cd274,Pold4,Blm,Cdca7,Hey2,Tgfb3,Sat1,Stat6,Ptgs1
GO:0065003	4	macromolecular complex assembly	327	0.0223	8	0.0396	0.0457131	E	Hist1h1d,Ache,Hist1h2bc,Hells,Hist1h2bg,Rrm2,Hist1h1c,Fbxo5
GO:0034645	5	cellular macromolecule biosynthetic process	2761	0.1883	43	0.2129	0.0466655	E	Zfp667,Lass6,Bhlhe40,Fen1,Cdc6,Nasp,Hmgb2,Mcm3,Hipk3,Gins1,Pold4,Vdr,Mcm5,Blm,Mcm10,Zcchc12,Pola1,Hells,Cdca7,Hey2,Zfp317,Mlf1ip,Tgfb3,Chaf1a,Atad2,Brip1,Aebp1,Creb3l2,Polq,E2f2,Fut11,Mcm6,Dtl,Ganab,Stat6,Uhrf1,Rpa2,Nr1d1,Mcm4,Rrm2,Lig3,Tlr4,Eif2ak2
GO:0002381	8,6,9,7	immunoglobulin production during immune response	27	0.0018	2	0.0099	0.0470305	E	Exo1,Stat6
GO:0051234	2,3	establishment of localization	2276	0.1553	36	0.1782	0.0496152	E	Fads3,Tmed3,Ache,Rab31,Ergic2,Hcn2,Slc39a9,Slc31a2,Nasp,Arfgap3,P2rx3,Vdr,Cnga3,Scn9a,Snap23,Stxbp4,Kcnab1,Slc41a2,Slc30a4,Trpc7,Atp6v0e2,Nsf,Slc16a14,Kdelr3,Slc1a4,Cenpe,Kcnn3,Cdc42se2,Slc7a6,Sil1,Ttyh2,Sec23a,Gria2,Vamp1,Scn3b,Fxyd5
GO:0045089	7,8,5,6	positive regulation of innate immune response	28	0.0019	2	0.0099	0.0499559	E	H60a,Tlr4
GO:0006338	7	chromatin remodeling	28	0.0019	2	0.0099	0.0499559	E	Nasp,Hells
GO:0018105	10,8,9	peptidyl-serine phosphorylation	28	0.0019	2	0.0099	0.0499559	E	Hipk3,Pbk
GO:0034961	6	cellular biopolymer biosynthetic process	2575	0.1757	40	0.198	0.0502738	E	Zfp667,Lass6,Bhlhe40,Fen1,Cdc6,Nasp,Hmgb2,Mcm3,Hipk3,Gins1,Pold4,Vdr,Mcm5,Blm,Mcm10,Zcchc12,Pola1,Hells,Cdca7,Hey2,Zfp317,Mlf1ip,Tgfb3,Chaf1a,Atad2,Brip1,Aebp1,Creb3l2,Polq,E2f2,Mcm6,Dtl,Stat6,Uhrf1,Rpa2,Nr1d1,Mcm4,Rrm2,Lig3,Eif2ak2
GO:0043284	5	biopolymer biosynthetic process	2576	0.1757	40	0.198	0.0503821	E	Zfp667,Lass6,Bhlhe40,Fen1,Cdc6,Nasp,Hmgb2,Mcm3,Hipk3,Gins1,Pold4,Vdr,Mcm5,Blm,Mcm10,Zcchc12,Pola1,Hells,Cdca7,Hey2,Zfp317,Mlf1ip,Tgfb3,Chaf1a,Atad2,Brip1,Aebp1,Creb3l2,Polq,E2f2,Mcm6,Dtl,Stat6,Uhrf1,Rpa2,Nr1d1,Mcm4,Rrm2,Lig3,Eif2ak2
GO:0070374	10,11,9,8	positive regulation of ERK1 and ERK2 cascade	4	0.0003	1	0.005	0.052883	E	Tlr4
GO:0042730	8,9,6,7	fibrinolysis	4	0.0003	1	0.005	0.052883	E	Anxa2
GO:0045636	8,7,6	positive regulation of melanocyte differentiation	4	0.0003	1	0.005	0.052883	E	Adamts9
GO:0006598	8,7	polyamine catabolic process	4	0.0003	1	0.005	0.052883	E	Sat1
GO:0006526	8,9	arginine biosynthetic process	4	0.0003	1	0.005	0.052883	E	Ass1
GO:0031623	7,5,6,8	receptor internalization	4	0.0003	1	0.005	0.052883	E	Ache
GO:0070371	9,8	ERK1 and ERK2 cascade	4	0.0003	1	0.005	0.052883	E	Tlr4
GO:0045357	8,7,9,6	regulation of interferon-beta biosynthetic process	4	0.0003	1	0.005	0.052883	E	Tlr4
GO:0045350	8,6	interferon-beta biosynthetic process	4	0.0003	1	0.005	0.052883	E	Tlr4
GO:0034453	7,6,5	microtubule anchoring	4	0.0003	1	0.005	0.052883	E	Cenpe
GO:0060561	6,7,5,4	apoptosis involved in morphogenesis	4	0.0003	1	0.005	0.052883	E	Vdr
GO:0032648	7,6	regulation of interferon-beta production	4	0.0003	1	0.005	0.052883	E	Tlr4
GO:0032020	9,8	ISG15-protein conjugation	4	0.0003	1	0.005	0.052883	E	Usp18
GO:0009186	9	deoxyribonucleoside diphosphate metabolic process	4	0.0003	1	0.005	0.052883	E	Rrm2
GO:0016441	9,8,4,7	posttranscriptional gene silencing	4	0.0003	1	0.005	0.052883	E	Dicer1
GO:0070372	9,10,8	regulation of ERK1 and ERK2 cascade	4	0.0003	1	0.005	0.052883	E	Tlr4
GO:0002829	9,7,8	negative regulation of T-helper 2 type immune response	4	0.0003	1	0.005	0.052883	E	Stat6
GO:0042271	8,12,13,9,11,10,6,7	susceptibility to natural killer cell mediated cytotoxicity	4	0.0003	1	0.005	0.052883	E	H60a
GO:0060057	7,8,6,9,10,5	apoptosis involved in mammary gland involution	4	0.0003	1	0.005	0.052883	E	Vdr
GO:0000089	7,9,8,6	mitotic metaphase	4	0.0003	1	0.005	0.052883	E	Fbxo5
GO:0050942	7,6,5	positive regulation of pigment cell differentiation	4	0.0003	1	0.005	0.052883	E	Adamts9
GO:0032608	5	interferon-beta production	4	0.0003	1	0.005	0.052883	E	Tlr4
GO:0060058	9,7,6,8,10,11,5	positive regulation of apoptosis involved in mammary gland involution	4	0.0003	1	0.005	0.052883	E	Vdr
GO:0035194	10,9,5,8	posttranscriptional gene silencing by RNA	4	0.0003	1	0.005	0.052883	E	Dicer1
GO:0046519	7,8	sphingoid metabolic process	29	0.002	2	0.0099	0.0529229	E	Lass6,Sgpp1
GO:0042401	7,6	biogenic amine biosynthetic process	29	0.002	2	0.0099	0.0529229	E	Ddc,Etnk2
GO:0006793	4	phosphorus metabolic process	938	0.064	17	0.0842	0.0536635	E	Chek1,Nek2,Hipk3,Wee1,Bub1b,Efna1,Map3k2,Ptprr,Pbk,Atp6v0e2,Melk,Cenpe,Plk3,Styx,Tgfbr1,Eif2ak2,Cbs
GO:0006796	5	phosphate metabolic process	938	0.064	17	0.0842	0.0536635	E	Chek1,Nek2,Hipk3,Wee1,Bub1b,Efna1,Map3k2,Ptprr,Pbk,Atp6v0e2,Melk,Cenpe,Plk3,Styx,Tgfbr1,Eif2ak2,Cbs
GO:0032609	4	interferon-gamma production	30	0.002	2	0.0099	0.055928	E	H60a,Tlr4
GO:0000075	6,5	cell cycle checkpoint	30	0.002	2	0.0099	0.055928	E	Chek1,Cenpe
GO:0043405	11,8,10	regulation of MAP kinase activity	70	0.0048	3	0.0149	0.0563581	E	Hipk3,Efna1,Cbs
GO:0006468	9,7,8	protein amino acid phosphorylation	674	0.046	13	0.0644	0.0566461	E	Chek1,Nek2,Hipk3,Wee1,Bub1b,Efna1,Map3k2,Pbk,Melk,Plk3,Tgfbr1,Eif2ak2,Cbs
GO:0006810	3,4	transport	2263	0.1544	35	0.1733	0.0568343	E	Fads3,Tmed3,Ache,Rab31,Ergic2,Hcn2,Slc39a9,Slc31a2,Nasp,Arfgap3,P2rx3,Vdr,Cnga3,Scn9a,Snap23,Stxbp4,Kcnab1,Slc41a2,Slc30a4,Trpc7,Atp6v0e2,Nsf,Slc16a14,Kdelr3,Slc1a4,Kcnn3,Cdc42se2,Slc7a6,Sil1,Ttyh2,Sec23a,Gria2,Vamp1,Scn3b,Fxyd5
GO:0016310	6	phosphorylation	816	0.0557	15	0.0743	0.0581671	E	Chek1,Nek2,Hipk3,Wee1,Bub1b,Efna1,Map3k2,Pbk,Atp6v0e2,Melk,Cenpe,Plk3,Tgfbr1,Eif2ak2,Cbs
GO:0016447	10,9,8,7,6,5	somatic recombination of immunoglobulin gene segments	31	0.0021	2	0.0099	0.0589677	E	Exo1,Stat6
GO:0010033	4	response to organic substance	73	0.005	3	0.0149	0.0614495	E	Anxa5,P2rx3,Tgfbr1
GO:0043408	8,9,7	regulation of MAPKKK cascade	73	0.005	3	0.0149	0.0614495	E	Hipk3,Tlr4,Cbs
GO:0009987	2	cellular process	11167	0.7618	156	0.7723	0.0631636	E	Serpine1,Kif15,Fads3,Zfp667,Hist1h1d,Espl1,Fkbp14,Gfpt1,Tdg,Lass6,Chek1,Bhlhe40,Fen1,Mylip,Ache,Rab31,Ergic2,Mrgprx2,Hcn2,Rhov,Shmt1,Usp18,Kazald1,Alms1,Cdc6,Isca1,Adamts9,Gar1,Hist1h2bc,Neil3,Serinc5,Esco2,Pcdh15,H60a,Nasp,Nek2,Hmgb2,Mcm3,Hipk3,Gins1,Incenp,Wee1,Arfgap3,Gstk1,Ccnf,Cd274,Rad54l,Pold4,P2rx3,Echdc2,Vdr,Smpd1,Mcm5,Cd2ap,Kif11,Galt,Blm,Zwilch,Mrgpre,Usp51,Mcm10,Stxbp4,Bub1b,Fancb,Efn…
GO:0015672	6,7	monovalent inorganic cation transport	297	0.0203	7	0.0347	0.0632746	E	Hcn2,Scn9a,Kcnab1,Atp6v0e2,Nsf,Kcnn3,Scn3b
GO:0051240	5,3,4	positive regulation of multicellular organismal process	125	0.0085	4	0.0198	0.0649813	E	H60a,Vdr,Hey2,Tlr4
GO:0016445	7,6,5,4	somatic diversification of immunoglobulins	33	0.0023	2	0.0099	0.0651384	E	Exo1,Stat6
GO:0042398	6,5	cellular amino acid derivative biosynthetic process	33	0.0023	2	0.0099	0.0651384	E	Ddc,Etnk2
GO:0006986	4,5	response to unfolded protein	33	0.0023	2	0.0099	0.0651384	E	Creb3l2,Eif2ak2
GO:0045213	6,7,5	neurotransmitter receptor metabolic process	5	0.0003	1	0.005	0.0651971	E	Ache
GO:0001881	6,5	receptor recycling	5	0.0003	1	0.005	0.0651971	E	Ache
GO:0032479	6,5	regulation of type I interferon production	5	0.0003	1	0.005	0.0651971	E	Tlr4
GO:0002834	6,5	regulation of response to tumor cell	5	0.0003	1	0.005	0.0651971	E	H60a
GO:0048289	8,13,12,11,10,9,7	isotype switching to IgE isotypes	5	0.0003	1	0.005	0.0651971	E	Stat6
GO:0002836	7,5,6	positive regulation of response to tumor cell	5	0.0003	1	0.005	0.0651971	E	H60a
GO:0002418	4,5	immune response to tumor cell	5	0.0003	1	0.005	0.0651971	E	H60a
GO:0006346	11,10,8,12,9,5	methylation-dependent chromatin silencing	5	0.0003	1	0.005	0.0651971	E	Hells
GO:0051341	5	regulation of oxidoreductase activity	5	0.0003	1	0.005	0.0651971	E	Vdr
GO:0014832	8	urinary bladder smooth muscle contraction	5	0.0003	1	0.005	0.0651971	E	P2rx3
GO:0046548	11,8,12,9,10	retinal rod cell development	5	0.0003	1	0.005	0.0651971	E	Alms1
GO:0046785	8,7,6	microtubule polymerization	5	0.0003	1	0.005	0.0651971	E	Fbxo5
GO:0002837	6,7,5	regulation of immune response to tumor cell	5	0.0003	1	0.005	0.0651971	E	H60a
GO:0006685	8,7,9	sphingomyelin catabolic process	5	0.0003	1	0.005	0.0651971	E	Smpd1
GO:0048293	10,6,11,12,9,14,13,5,8	regulation of isotype switching to IgE isotypes	5	0.0003	1	0.005	0.0651971	E	Stat6
GO:0060045	7,6,8,5,9,4	positive regulation of cardiac muscle cell proliferation	5	0.0003	1	0.005	0.0651971	E	Hey2
GO:0000086	8,5,6,7,4	G2/M transition of mitotic cell cycle	5	0.0003	1	0.005	0.0651971	E	Chek1
GO:0006012	7,8	galactose metabolic process	5	0.0003	1	0.005	0.0651971	E	Galt
GO:0043030	7,6,5	regulation of macrophage activation	5	0.0003	1	0.005	0.0651971	E	H60a
GO:0048087	6,4,5	positive regulation of pigmentation during development	5	0.0003	1	0.005	0.0651971	E	Adamts9
GO:0030195	7,8,5,6	negative regulation of blood coagulation	5	0.0003	1	0.005	0.0651971	E	Anxa2
GO:0001938	7,5,6	positive regulation of endothelial cell proliferation	5	0.0003	1	0.005	0.0651971	E	Pold4
GO:0002839	7,8,5,6	positive regulation of immune response to tumor cell	5	0.0003	1	0.005	0.0651971	E	H60a
GO:0002833	6,4,5	positive regulation of response to biotic stimulus	5	0.0003	1	0.005	0.0651971	E	H60a
GO:0014848	7	urinary tract smooth muscle contraction	5	0.0003	1	0.005	0.0651971	E	P2rx3
GO:0032874	10,9,7,8,11,5,6	positive regulation of stress-activated MAPK cascade	5	0.0003	1	0.005	0.0651971	E	Tlr4
GO:0044255	4,5	cellular lipid metabolic process	564	0.0385	11	0.0545	0.0660338	E	Fads3,Lass6,Alms1,Serinc5,Echdc2,Smpd1,Retsat,Etnk2,Sgpp1,Dbt,Ptgs1
GO:0034621	4,3	cellular macromolecular complex subunit organization	308	0.021	7	0.0347	0.0703999	E	Hist1h1d,Hist1h2bc,Nasp,Hells,Hist1h2bg,Hist1h1c,Fbxo5
GO:0007276	4,3	gamete generation	309	0.0211	7	0.0347	0.0710529	E	Alms1,Hmgb2,Fancd2,Trip13,Styx,Tgfbr1,Fbxo5
GO:0045088	6,7,5	regulation of innate immune response	35	0.0024	2	0.0099	0.0714103	E	H60a,Tlr4
GO:0033555	3,4	multicellular organismal response to stress	35	0.0024	2	0.0099	0.0714103	E	P2rx3,Scn9a
GO:0016444	8,7	somatic cell DNA recombination	35	0.0024	2	0.0099	0.0714103	E	Exo1,Stat6
GO:0002562	9,8,7,5,4	somatic diversification of immune receptors via germline recombination within a single locus	35	0.0024	2	0.0099	0.0714103	E	Exo1,Stat6
GO:0019752	5	carboxylic acid metabolic process	441	0.0301	9	0.0446	0.071551	E	Fads3,Gfpt1,Shmt1,Echdc2,Ass1,Ddc,Dbt,Cbs,Ptgs1
GO:0051130	5,3,4	positive regulation of cellular component organization	79	0.0054	3	0.0149	0.0719474	E	Tgfb3,Cenpe,Tgfbr1
GO:0006082	4	organic acid metabolic process	442	0.0302	9	0.0446	0.0720468	E	Fads3,Gfpt1,Shmt1,Echdc2,Ass1,Ddc,Dbt,Cbs,Ptgs1
GO:0043412	5	biopolymer modification	1238	0.0845	20	0.099	0.0722071	E	Chek1,Usp18,Nek2,Hipk3,Wee1,Bub1b,Efna1,Map3k2,Hells,Ptprr,Pbk,Pcmtd1,Melk,Plk3,Styx,Fut11,Tgfbr1,Ganab,Eif2ak2,Cbs
GO:0051179	2	localization	2671	0.1822	37	0.1832	0.0728577	E	Fads3,Tmed3,Ache,Rab31,Ergic2,Hcn2,Slc39a9,Slc31a2,Nasp,Arfgap3,P2rx3,Vdr,Cnga3,Scn9a,Snap23,Stxbp4,Kcnab1,Slc41a2,Slc30a4,Trpc7,Atp6v0e2,Nsf,Slc16a14,Kdelr3,Slc1a4,Cenpe,Kcnn3,Cdc42se2,Tgfbr1,Slc7a6,Sil1,Ttyh2,Sec23a,Gria2,Vamp1,Scn3b,Fxyd5
GO:0051249	7,6,5	regulation of lymphocyte activation	132	0.009	4	0.0198	0.0735972	E	H60a,Cd274,Blm,Stat6
GO:0001568	6,7	blood vessel development	250	0.0171	6	0.0297	0.0738564	E	Serpine1,Hey2,Pgf,Tgfbr1,Anxa2,Dicer1
GO:0048477	6,5	oogenesis	36	0.0025	2	0.0099	0.0745768	E	Trip13,Fbxo5
GO:0001701	6,7	in utero embryonic development	252	0.0172	6	0.0297	0.0754162	E	Nasp,Gins1,Tgfb3,Stil,Etnk2,Tgfbr1
GO:0006915	5	apoptosis	731	0.0499	13	0.0644	0.0755046	E	Alms1,H60a,Hipk3,Vdr,Bub1b,Hells,Tgfb3,Stil,E2f2,Tgfbr1,Sgpp1,Faim2,Eif2ak2
GO:0051225	4,7,8,6	spindle assembly	6	0.0004	1	0.005	0.0771634	E	Fbxo5
GO:0035058	6	sensory cilium assembly	6	0.0004	1	0.005	0.0771634	E	Pcdh15
GO:0008215	8	spermine metabolic process	6	0.0004	1	0.005	0.0771634	E	Sat1
GO:0031163	6	metallo-sulfur cluster assembly	6	0.0004	1	0.005	0.0771634	E	Isca1
GO:0060017	6,7	parathyroid gland development	6	0.0004	1	0.005	0.0771634	E	Tgfbr1
GO:0000819	5,4	sister chromatid segregation	6	0.0004	1	0.005	0.0771634	E	Nek2
GO:0031577	7,6	spindle checkpoint	6	0.0004	1	0.005	0.0771634	E	Cenpe
GO:0000239	11,9,8,6,10,7,5	pachytene	6	0.0004	1	0.005	0.0771634	E	Trip13
GO:0016226	7	iron-sulfur cluster assembly	6	0.0004	1	0.005	0.0771634	E	Isca1
GO:0006534	7,8,6	cysteine metabolic process	6	0.0004	1	0.005	0.0771634	E	Cbs
GO:0007094	10,9,8,11,12,7,6	mitotic cell cycle spindle assembly checkpoint	6	0.0004	1	0.005	0.0771634	E	Cenpe
GO:0045634	7,6	regulation of melanocyte differentiation	6	0.0004	1	0.005	0.0771634	E	Adamts9
GO:0032872	9,8,7,10,6	regulation of stress-activated MAPK cascade	6	0.0004	1	0.005	0.0771634	E	Tlr4
GO:0045841	9,8,7,10,11,6,5	negative regulation of mitotic metaphase/anaphase transition	6	0.0004	1	0.005	0.0771634	E	Cenpe
GO:0001678	7,8,5	cellular glucose homeostasis	6	0.0004	1	0.005	0.0771634	E	Alms1
GO:0050932	6,5	regulation of pigment cell differentiation	6	0.0004	1	0.005	0.0771634	E	Adamts9
GO:0060745	9,8,10,11,12,7,5,6	mammary gland branching involved in pregnancy	6	0.0004	1	0.005	0.0771634	E	Vdr
GO:0048013	9,8	ephrin receptor signaling pathway	6	0.0004	1	0.005	0.0771634	E	Efna1
GO:0000070	6,7,9,8,5	mitotic sister chromatid segregation	6	0.0004	1	0.005	0.0771634	E	Nek2
GO:0060013	5	righting reflex	6	0.0004	1	0.005	0.0771634	E	Pcdh15
GO:0006629	4	lipid metabolic process	664	0.0453	12	0.0594	0.0772839	E	Fads3,Lass6,Alms1,Serinc5,Echdc2,Smpd1,Retsat,Etnk2,Sgpp1,Pld4,Dbt,Ptgs1
GO:0009791	4,3	post-embryonic development	82	0.0056	3	0.0149	0.0773188	E	Scn9a,Etnk2,Tgfbr1
GO:0002200	6,4,3	somatic diversification of immune receptors	37	0.0025	2	0.0099	0.0777601	E	Exo1,Stat6
GO:0018209	9,8	peptidyl-serine modification	37	0.0025	2	0.0099	0.0777601	E	Hipk3,Pbk
GO:0001944	5,6	vasculature development	255	0.0174	6	0.0297	0.0777612	E	Serpine1,Hey2,Pgf,Tgfbr1,Anxa2,Dicer1
GO:0051239	4,3	regulation of multicellular organismal process	666	0.0454	12	0.0594	0.0779867	E	Serpine1,Anxa5,H60a,P2rx3,Vdr,Efna1,Hey2,Pgf,Enpp1,Anxa2,Stat6,Tlr4
GO:0048856	3	anatomical structure development	2121	0.1447	30	0.1485	0.0783214	E	Serpine1,Ache,Kazald1,Alms1,Serinc5,Pcdh15,Nasp,Hmgb2,Gins1,Ccnf,Vdr,Blm,Efna1,Hells,Hey2,Igfbp5,Tgfb3,Ect2,Stil,Cdc42ep5,Rfng,Pgf,Etnk2,Cdc42se2,Tgfbr1,Enpp1,Exo1,Anxa2,Stat6,Dicer1
GO:0006464	7,6	protein modification process	1195	0.0815	19	0.0941	0.0785403	E	Chek1,Usp18,Nek2,Hipk3,Wee1,Bub1b,Efna1,Map3k2,Ptprr,Pbk,Pcmtd1,Melk,Plk3,Styx,Fut11,Tgfbr1,Ganab,Eif2ak2,Cbs
GO:0051128	4,3	regulation of cellular component organization	256	0.0175	6	0.0297	0.078544	E	Efna1,Tgfb3,Cdc42ep5,Cenpe,Cdc42se2,Tgfbr1
GO:0012501	4	programmed cell death	742	0.0506	13	0.0644	0.0790131	E	Alms1,H60a,Hipk3,Vdr,Bub1b,Hells,Tgfb3,Stil,E2f2,Tgfbr1,Sgpp1,Faim2,Eif2ak2
GO:0051241	5,3,4	negative regulation of multicellular organismal process	85	0.0058	3	0.0149	0.0827489	E	Anxa5,Enpp1,Anxa2
GO:0002694	6,5,4	regulation of leukocyte activation	140	0.0096	4	0.0198	0.0836631	E	H60a,Cd274,Blm,Stat6
GO:0008652	6,7	cellular amino acid biosynthetic process	39	0.0027	2	0.0099	0.0841662	E	Ass1,Cbs
GO:0009064	6,7	glutamine family amino acid metabolic process	39	0.0027	2	0.0099	0.0841662	E	Gfpt1,Ass1
GO:0006633	7,6,8,5	fatty acid biosynthetic process	86	0.0059	3	0.0149	0.0845691	E	Fads3,Dbt,Ptgs1
GO:0006355	8,7,9,6	regulation of transcription, DNA-dependent	1766	0.1205	25	0.1238	0.0846703	E	Zfp667,Lass6,Bhlhe40,Hmgb2,Mcm3,Hipk3,Vdr,Mcm5,Zcchc12,Hells,Cdca7,Hey2,Mlf1ip,Tgfb3,Chaf1a,Atad2,Brip1,Aebp1,Creb3l2,E2f2,Mcm6,Stat6,Uhrf1,Nr1d1,Mcm4
GO:0046649	5,4	lymphocyte activation	264	0.018	6	0.0297	0.084813	E	H60a,Cd274,Blm,Hells,Exo1,Stat6
GO:0045859	10,7,9	regulation of protein kinase activity	141	0.0096	4	0.0198	0.0849315	E	Hipk3,Efna1,Cenpe,Cbs
GO:0006351	8,6,7	transcription, DNA-dependent	1781	0.1215	25	0.1238	0.0851309	E	Zfp667,Lass6,Bhlhe40,Hmgb2,Mcm3,Hipk3,Vdr,Mcm5,Zcchc12,Hells,Cdca7,Hey2,Mlf1ip,Tgfb3,Chaf1a,Atad2,Brip1,Aebp1,Creb3l2,E2f2,Mcm6,Stat6,Uhrf1,Nr1d1,Mcm4
GO:0051252	7,6,5	regulation of RNA metabolic process	1782	0.1216	25	0.1238	0.0851555	E	Zfp667,Lass6,Bhlhe40,Hmgb2,Mcm3,Hipk3,Vdr,Mcm5,Zcchc12,Hells,Cdca7,Hey2,Mlf1ip,Tgfb3,Chaf1a,Atad2,Brip1,Aebp1,Creb3l2,E2f2,Mcm6,Stat6,Uhrf1,Nr1d1,Mcm4
GO:0032774	5,7,6	RNA biosynthetic process	1785	0.1218	25	0.1238	0.0852247	E	Zfp667,Lass6,Bhlhe40,Hmgb2,Mcm3,Hipk3,Vdr,Mcm5,Zcchc12,Hells,Cdca7,Hey2,Mlf1ip,Tgfb3,Chaf1a,Atad2,Brip1,Aebp1,Creb3l2,E2f2,Mcm6,Stat6,Uhrf1,Nr1d1,Mcm4
GO:0050865	5,4	regulation of cell activation	142	0.0097	4	0.0198	0.0862014	E	H60a,Cd274,Blm,Stat6
GO:0043687	8,7	post-translational protein modification	1006	0.0686	16	0.0792	0.0877866	E	Chek1,Usp18,Nek2,Hipk3,Wee1,Bub1b,Efna1,Map3k2,Ptprr,Pbk,Melk,Plk3,Styx,Tgfbr1,Eif2ak2,Cbs
GO:0042221	3	response to chemical stimulus	695	0.0474	12	0.0594	0.0878228	E	Anxa5,Hmgb2,Rad54l,P2rx3,Stxbp4,Ddc,Creb3l2,Tgfbr1,Dicer1,Tlr4,Eif2ak2,Ptgs1
GO:0051251	8,7,6,5	positive regulation of lymphocyte activation	88	0.006	3	0.0149	0.088221	E	H60a,Blm,Stat6
GO:0008219	3	cell death	773	0.0527	13	0.0644	0.088378	E	Alms1,H60a,Hipk3,Vdr,Bub1b,Hells,Tgfb3,Stil,E2f2,Tgfbr1,Sgpp1,Faim2,Eif2ak2
GO:0051403	9,8,7,6	stress-activated MAPK cascade	7	0.0005	1	0.005	0.0887891	E	Tlr4
GO:0055069	9	zinc ion homeostasis	7	0.0005	1	0.005	0.0887891	E	Slc30a4
GO:0060056	7,8,9,6,4	mammary gland involution	7	0.0005	1	0.005	0.0887891	E	Vdr
GO:0060088	5,6,13,12,11,9,8,14,10,7	auditory receptor cell stereocilium organization	7	0.0005	1	0.005	0.0887891	E	Pcdh15
GO:0060037	5,6,7	pharyngeal system development	7	0.0005	1	0.005	0.0887891	E	Tgfbr1
GO:0006998	4,5	nuclear envelope organization	7	0.0005	1	0.005	0.0887891	E	Zmpste24
GO:0051785	7,6,5	positive regulation of nuclear division	7	0.0005	1	0.005	0.0887891	E	Cenpe
GO:0051323	7,6,5	metaphase	7	0.0005	1	0.005	0.0887891	E	Fbxo5
GO:0046513	8,9,10	ceramide biosynthetic process	7	0.0005	1	0.005	0.0887891	E	Lass6
GO:0045840	8,7,6,9,10,5	positive regulation of mitosis	7	0.0005	1	0.005	0.0887891	E	Cenpe
GO:0014821	7	phasic smooth muscle contraction	7	0.0005	1	0.005	0.0887891	E	P2rx3
GO:0045839	8,7,6,9,10,5	negative regulation of mitosis	7	0.0005	1	0.005	0.0887891	E	Cenpe
GO:0051784	7,5,6	negative regulation of nuclear division	7	0.0005	1	0.005	0.0887891	E	Cenpe
GO:0009070	7,8	serine family amino acid biosynthetic process	7	0.0005	1	0.005	0.0887891	E	Cbs
GO:0030432	8	peristalsis	7	0.0005	1	0.005	0.0887891	E	P2rx3
GO:0002093	5,12,11,8,13,9,10,6,7	auditory receptor cell morphogenesis	7	0.0005	1	0.005	0.0887891	E	Pcdh15
GO:0045599	7,6,5	negative regulation of fat cell differentiation	7	0.0005	1	0.005	0.0887891	E	Enpp1
GO:0051726	5,4	regulation of cell cycle	145	0.0099	4	0.0198	0.0900171	E	Chek1,Cenpe,E2f2,Fbxo5
GO:0043062	3	extracellular structure organization	145	0.0099	4	0.0198	0.0900171	E	Kazald1,Tgfbi,Tgfbr1,Anxa2
GO:0016265	2	death	782	0.0533	13	0.0644	0.0909133	E	Alms1,H60a,Hipk3,Vdr,Bub1b,Hells,Tgfb3,Stil,E2f2,Tgfbr1,Sgpp1,Faim2,Eif2ak2
GO:0043549	9,6,8	regulation of kinase activity	146	0.01	4	0.0198	0.0912902	E	Hipk3,Efna1,Cenpe,Cbs
GO:0048519	4,2,3	negative regulation of biological process	1118	0.0763	17	0.0842	0.0928504	E	Anxa5,Bhlhe40,Hipk3,Cd274,Vdr,Blm,Hells,Hey2,Tgfb3,Stil,Cenpe,Tro,Tgfbr1,Enpp1,Anxa2,Stat6,Dicer1
GO:0048754	6,5	branching morphogenesis of a tube	91	0.0062	3	0.0149	0.0937191	E	Vdr,Pgf,Dicer1
GO:0001525	4,6,7,8,9,5	angiogenesis	148	0.0101	4	0.0198	0.0938367	E	Serpine1,Pgf,Anxa2,Dicer1
GO:0051235	4,3	maintenance of location	42	0.0029	2	0.0099	0.0938372	E	Kdelr3,Cenpe
GO:0008610	4,5	lipid biosynthetic process	276	0.0188	6	0.0297	0.0941687	E	Fads3,Lass6,Serinc5,Etnk2,Dbt,Ptgs1
GO:0034622	5,4	cellular macromolecular complex assembly	276	0.0188	6	0.0297	0.0941687	E	Hist1h1d,Hist1h2bc,Hells,Hist1h2bg,Hist1h1c,Fbxo5
GO:0051338	5	regulation of transferase activity	149	0.0102	4	0.0198	0.0951096	E	Hipk3,Efna1,Cenpe,Cbs
GO:0022604	5,6,4,7	regulation of cell morphogenesis	92	0.0063	3	0.0149	0.0955548	E	Efna1,Cdc42ep5,Cdc42se2
GO:0051329	7,5,6	interphase of mitotic cell cycle	43	0.0029	2	0.0099	0.097068	E	Chek1,Anp32b
GO:0016458	8,3,6,7	gene silencing	43	0.0029	2	0.0099	0.097068	E	Hells,Dicer1
GO:0051325	6,5	interphase	43	0.0029	2	0.0099	0.097068	E	Chek1,Anp32b
GO:0065009	3	regulation of molecular function	421	0.0287	8	0.0396	0.0973056	E	Hipk3,Arfgap3,Vdr,Blm,Efna1,Cenpe,Cbs,Fbxo5
GO:0046394	6	carboxylic acid biosynthetic process	93	0.0063	3	0.0149	0.0973911	E	Fads3,Dbt,Ptgs1
GO:0002696	7,6,5,4	positive regulation of leukocyte activation	93	0.0063	3	0.0149	0.0973911	E	H60a,Blm,Stat6
GO:0016053	5	organic acid biosynthetic process	93	0.0063	3	0.0149	0.0973911	E	Fads3,Dbt,Ptgs1
GO:0006813	7,8	potassium ion transport	151	0.0103	4	0.0198	0.0976535	E	Hcn2,Kcnab1,Nsf,Kcnn3
GO:0048583	4,3	regulation of response to stimulus	282	0.0192	6	0.0297	0.0987861	E	H60a,Hipk3,Anxa2,Stat6,Tlr4,Cbs
GO:0002347	4	response to tumor cell	8	0.0005	1	0.005	0.100081	E	H60a
GO:0060043	6,5,7,8,4	regulation of cardiac muscle cell proliferation	8	0.0005	1	0.005	0.100081	E	Hey2
GO:0002532	7	production of molecular mediator of acute inflammatory response	8	0.0005	1	0.005	0.100081	E	Tlr4
GO:0045910	9,8,7,6	negative regulation of DNA recombination	8	0.0005	1	0.005	0.100081	E	Blm
GO:0051320	7,6,5	S phase	8	0.0005	1	0.005	0.100081	E	Anp32b
GO:0000578	5,6	embryonic axis specification	8	0.0005	1	0.005	0.100081	E	Stil
GO:0009263	9	deoxyribonucleotide biosynthetic process	8	0.0005	1	0.005	0.100081	E	Rrm2
GO:0000084	8,7,6	S phase of mitotic cell cycle	8	0.0005	1	0.005	0.100081	E	Anp32b
GO:0015991	7,9,8,10	ATP hydrolysis coupled proton transport	8	0.0005	1	0.005	0.100081	E	Atp6v0e2
GO:0042572	7,5,9,10	retinol metabolic process	8	0.0005	1	0.005	0.100081	E	Retsat
GO:0050829	6,7	defense response to Gram-negative bacterium	8	0.0005	1	0.005	0.100081	E	Tlr4
GO:0046520	7,8,9	sphingoid biosynthetic process	8	0.0005	1	0.005	0.100081	E	Lass6
GO:0008593	7,8,6	regulation of Notch signaling pathway	8	0.0005	1	0.005	0.100081	E	Hey2
GO:0015988	6,8,7,9	energy coupled proton transport, against electrochemical gradient	8	0.0005	1	0.005	0.100081	E	Atp6v0e2
GO:0002831	5,4	regulation of response to biotic stimulus	8	0.0005	1	0.005	0.100081	E	H60a
GO:0033198	5	response to ATP	8	0.0005	1	0.005	0.100081	E	P2rx3
GO:0051259	6,5	protein oligomerization	44	0.003	2	0.0099	0.100299	E	Ache,Rrm2
GO:0001819	6,4,5	positive regulation of cytokine production	44	0.003	2	0.0099	0.100299	E	H60a,Tlr4
GO:0045184	3,4,5	establishment of protein localization	658	0.0449	11	0.0545	0.100801	E	Tmed3,Rab31,Nasp,Arfgap3,Snap23,Stxbp4,Nsf,Kdelr3,Cenpe,Sil1,Sec23a
GO:0007281	5,6,4	germ cell development	95	0.0065	3	0.0149	0.101063	E	Alms1,Trip13,Fbxo5
GO:0050867	6,4,5	positive regulation of cell activation	95	0.0065	3	0.0149	0.101063	E	H60a,Blm,Stat6
GO:0050790	4	regulation of catalytic activity	360	0.0246	7	0.0347	0.103908	E	Hipk3,Arfgap3,Vdr,Efna1,Cenpe,Cbs,Fbxo5
GO:0019953	3	sexual reproduction	360	0.0246	7	0.0347	0.103908	E	Alms1,Hmgb2,Fancd2,Trip13,Styx,Tgfbr1,Fbxo5
GO:0045321	4,3	leukocyte activation	290	0.0198	6	0.0297	0.104841	E	H60a,Cd274,Blm,Hells,Exo1,Stat6
GO:0008360	6,7,4,5,8	regulation of cell shape	46	0.0031	2	0.0099	0.106752	E	Cdc42ep5,Cdc42se2
GO:0031349	6,7,4,5	positive regulation of defense response	46	0.0031	2	0.0099	0.106752	E	H60a,Tlr4
GO:0019725	5,3	cellular homeostasis	293	0.02	6	0.0297	0.107075	E	Hcn2,Alms1,Serinc5,Vdr,Gpr12,Pdia5
GO:0055082	6,4	cellular chemical homeostasis	225	0.0153	5	0.0248	0.108188	E	Hcn2,Alms1,Serinc5,Vdr,Gpr12
GO:0040029	7,6	regulation of gene expression, epigenetic	47	0.0032	2	0.0099	0.109971	E	Hells,Dicer1
GO:0010564	6,5,4	regulation of cell cycle process	47	0.0032	2	0.0099	0.109971	E	Cenpe,Fbxo5
GO:0048523	5,3,4	negative regulation of cellular process	1007	0.0687	14	0.0693	0.110566	E	Bhlhe40,Hipk3,Cd274,Vdr,Blm,Hells,Hey2,Tgfb3,Stil,Cenpe,Tro,Tgfbr1,Enpp1,Dicer1
GO:0046641	11,10,9,8	positive regulation of alpha-beta T cell proliferation	9	0.0006	1	0.005	0.111047	E	Blm
GO:0002566	7,5,4	somatic diversification of immune receptors via somatic mutation	9	0.0006	1	0.005	0.111047	E	Exo1
GO:0060117	11,10,7,12,8,9	auditory receptor cell development	9	0.0006	1	0.005	0.111047	E	Pcdh15
GO:0016446	8,7,6,5	somatic hypermutation of immunoglobulin genes	9	0.0006	1	0.005	0.111047	E	Exo1
GO:0042135	6,8,9,5	neurotransmitter catabolic process	9	0.0006	1	0.005	0.111047	E	Ache
GO:0000050	7	urea cycle	9	0.0006	1	0.005	0.111047	E	Ass1
GO:0050910	9,7,6	detection of mechanical stimulus involved in sensory perception of sound	9	0.0006	1	0.005	0.111047	E	Pcdh15
GO:0045429	8,7,6,5	positive regulation of nitric oxide biosynthetic process	9	0.0006	1	0.005	0.111047	E	H60a
GO:0046457	9,8,10,7	prostanoid biosynthetic process	9	0.0006	1	0.005	0.111047	E	Ptgs1
GO:0030903	6,7,5	notochord development	9	0.0006	1	0.005	0.111047	E	Stil
GO:0001516	10,9,11,8	prostaglandin biosynthetic process	9	0.0006	1	0.005	0.111047	E	Ptgs1
GO:0060122	4,11,10,7,12,8,9	inner ear receptor stereocilium organization	9	0.0006	1	0.005	0.111047	E	Pcdh15
GO:0040020	7,9,6,8,5	regulation of meiosis	9	0.0006	1	0.005	0.111047	E	Fbxo5
GO:0002828	8,7	regulation of T-helper 2 type immune response	9	0.0006	1	0.005	0.111047	E	Stat6
GO:0001936	6,5	regulation of endothelial cell proliferation	9	0.0006	1	0.005	0.111047	E	Pold4
GO:0006525	7,8	arginine metabolic process	9	0.0006	1	0.005	0.111047	E	Ass1
GO:0019627	6	urea metabolic process	9	0.0006	1	0.005	0.111047	E	Ass1
GO:0045351	7,5	type I interferon biosynthetic process	9	0.0006	1	0.005	0.111047	E	Tlr4
GO:0006684	7,6,8	sphingomyelin metabolic process	9	0.0006	1	0.005	0.111047	E	Smpd1
GO:0043603	5	cellular amide metabolic process	9	0.0006	1	0.005	0.111047	E	Ass1
GO:0007141	10,6,8,9,5,7	male meiosis I	9	0.0006	1	0.005	0.111047	E	Trip13
GO:0035239	5,4	tube morphogenesis	163	0.0111	4	0.0198	0.112766	E	Vdr,Stil,Pgf,Dicer1
GO:0006508	7,6	proteolysis	901	0.0615	13	0.0644	0.112817	E	Espl1,Mylip,Usp18,Ctso,Adamts9,Usp51,Usp1,Nsf,Aebp1,Dtl,Zmpste24,Uhrf1,Fbxo5
GO:0030163	6,5	protein catabolic process	930	0.0634	13	0.0644	0.114293	E	Espl1,Mylip,Usp18,Ctso,Adamts9,Usp51,Usp1,Nsf,Aebp1,Dtl,Zmpste24,Uhrf1,Fbxo5
GO:0001775	3	cell activation	308	0.021	6	0.0297	0.117855	E	H60a,Cd274,Blm,Hells,Exo1,Stat6
GO:0006325	5	establishment or maintenance of chromatin architecture	310	0.0211	6	0.0297	0.119236	E	Hist1h1d,Hist1h2bc,Nasp,Hells,Hist1h2bg,Hist1h1c
GO:0035264	3	multicellular organism growth	105	0.0072	3	0.0149	0.119275	E	Pcdh15,Stil,Etnk2
GO:0008104	4	protein localization	756	0.0516	11	0.0545	0.121567	E	Tmed3,Rab31,Nasp,Arfgap3,Snap23,Stxbp4,Nsf,Kdelr3,Cenpe,Sil1,Sec23a
GO:0030279	6,8,7,9,4,5	negative regulation of ossification	10	0.0007	1	0.005	0.121692	E	Enpp1
GO:0032814	8,7,6	regulation of natural killer cell activation	10	0.0007	1	0.005	0.121692	E	H60a
GO:0002221	10,9,11,8,6	pattern recognition receptor signaling pathway	10	0.0007	1	0.005	0.121692	E	Tlr4
GO:0045830	10,9,6,11,12,8,13,14,5,7	positive regulation of isotype switching	10	0.0007	1	0.005	0.121692	E	Stat6
GO:0007098	8,6,5,4,7	centrosome cycle	10	0.0007	1	0.005	0.121692	E	Kif11
GO:0042092	6	T-helper 2 type immune response	10	0.0007	1	0.005	0.121692	E	Stat6
GO:0051445	6,5	regulation of meiotic cell cycle	10	0.0007	1	0.005	0.121692	E	Fbxo5
GO:0006544	7,8	glycine metabolic process	10	0.0007	1	0.005	0.121692	E	Shmt1
GO:0032816	9,8,7,6	positive regulation of natural killer cell activation	10	0.0007	1	0.005	0.121692	E	H60a
GO:0006835	6,7	dicarboxylic acid transport	10	0.0007	1	0.005	0.121692	E	Slc1a4
GO:0001833	4,6,5,9,10	inner cell mass cell proliferation	10	0.0007	1	0.005	0.121692	E	Gins1
GO:0051173	6,4,5	positive regulation of nitrogen compound metabolic process	10	0.0007	1	0.005	0.121692	E	H60a
GO:0032606	4	type I interferon production	10	0.0007	1	0.005	0.121692	E	Tlr4
GO:0015031	4,5,6	protein transport	651	0.0444	10	0.0495	0.121722	E	Tmed3,Rab31,Nasp,Arfgap3,Snap23,Stxbp4,Nsf,Kdelr3,Sil1,Sec23a
GO:0048878	5	chemical homeostasis	315	0.0215	6	0.0297	0.122622	E	Hcn2,Alms1,Serinc5,Vdr,Slc30a4,Gpr12
GO:0002377	5,6	immunoglobulin production	51	0.0035	2	0.0099	0.122749	E	Exo1,Stat6
GO:0032943	5	mononuclear cell proliferation	107	0.0073	3	0.0149	0.12286	E	Cd274,Blm,Hells
GO:0046651	6,5	lymphocyte proliferation	107	0.0073	3	0.0149	0.12286	E	Cd274,Blm,Hells
GO:0009887	5,6,4	organ morphogenesis	785	0.0536	11	0.0545	0.12343	E	Serpine1,Alms1,Pcdh15,Vdr,Hey2,Tgfb3,Stil,Pgf,Tgfbr1,Anxa2,Dicer1
GO:0033036	3	macromolecule localization	791	0.054	11	0.0545	0.123566	E	Tmed3,Rab31,Nasp,Arfgap3,Snap23,Stxbp4,Nsf,Kdelr3,Cenpe,Sil1,Sec23a
GO:0006520	5,6	cellular amino acid metabolic process	172	0.0117	4	0.0198	0.123771	E	Gfpt1,Shmt1,Ass1,Cbs
GO:0042592	4	homeostatic process	568	0.0387	9	0.0446	0.124341	E	Hcn2,Alms1,Serinc5,Vdr,Blm,Slc30a4,Gpr12,Pdia5,Dicer1
GO:0019941	9,7,8	modification-dependent protein catabolic process	483	0.0329	8	0.0396	0.125604	E	Mylip,Usp18,Usp51,Usp1,Dtl,Zmpste24,Uhrf1,Fbxo5
GO:0043632	6	modification-dependent macromolecule catabolic process	483	0.0329	8	0.0396	0.125604	E	Mylip,Usp18,Usp51,Usp1,Dtl,Zmpste24,Uhrf1,Fbxo5
GO:0007292	5,4	female gamete generation	52	0.0035	2	0.0099	0.125911	E	Trip13,Fbxo5
GO:0070661	4	leukocyte proliferation	109	0.0074	3	0.0149	0.126416	E	Cd274,Blm,Hells
GO:0050801	6	ion homeostasis	248	0.0169	5	0.0248	0.128815	E	Hcn2,Serinc5,Vdr,Slc30a4,Gpr12
GO:0051603	8,7	proteolysis involved in cellular protein catabolic process	497	0.0339	8	0.0396	0.130368	E	Mylip,Usp18,Usp51,Usp1,Dtl,Zmpste24,Uhrf1,Fbxo5
GO:0044257	7,6	cellular protein catabolic process	499	0.034	8	0.0396	0.130992	E	Mylip,Usp18,Usp51,Usp1,Dtl,Zmpste24,Uhrf1,Fbxo5
GO:0060004	4	reflex	11	0.0008	1	0.005	0.132025	E	Pcdh15
GO:0042423	7,8	catecholamine biosynthetic process	11	0.0008	1	0.005	0.132025	E	Ddc
GO:0060119	10,9,6,11,7,8	inner ear receptor cell development	11	0.0008	1	0.005	0.132025	E	Pcdh15
GO:0001935	4	endothelial cell proliferation	11	0.0008	1	0.005	0.132025	E	Pold4
GO:0042116	6,5	macrophage activation	11	0.0008	1	0.005	0.132025	E	H60a
GO:0051297	7,5,6	centrosome organization	11	0.0008	1	0.005	0.132025	E	Kif11
GO:0045911	9,8,7,6	positive regulation of DNA recombination	11	0.0008	1	0.005	0.132025	E	Stat6
GO:0030193	6,7,5	regulation of blood coagulation	11	0.0008	1	0.005	0.132025	E	Anxa2
GO:0045132	9,7,8,6,4	meiotic chromosome segregation	11	0.0008	1	0.005	0.132025	E	Espl1
GO:0045428	7,6,5	regulation of nitric oxide biosynthetic process	11	0.0008	1	0.005	0.132025	E	H60a
GO:0006298	8,7	mismatch repair	11	0.0008	1	0.005	0.132025	E	Tdg
GO:0000097	7,8,6	sulfur amino acid biosynthetic process	11	0.0008	1	0.005	0.132025	E	Cbs
GO:0048070	5,4	regulation of pigmentation during development	11	0.0008	1	0.005	0.132025	E	Adamts9
GO:0008354	6,7,5,4	germ cell migration	11	0.0008	1	0.005	0.132025	E	Tgfbr1
GO:0010627	7,8,6	regulation of protein kinase cascade	113	0.0077	3	0.0149	0.133433	E	Hipk3,Tlr4,Cbs
GO:0016192	3,4,5	vesicle-mediated transport	419	0.0286	7	0.0347	0.134611	E	Ache,Ergic2,Arfgap3,Kdelr3,Cdc42se2,Sec23a,Vamp1
GO:0045595	5,4	regulation of cell differentiation	335	0.0229	6	0.0297	0.135094	E	Alms1,Adamts9,Vdr,Efna1,Enpp1,Dicer1
GO:0002440	4,5	production of molecular mediator of immune response	55	0.0038	2	0.0099	0.135295	E	Exo1,Stat6
GO:0007286	6,7,8,5	spermatid development	55	0.0038	2	0.0099	0.135295	E	Alms1,Trip13
GO:0042129	9,8,7	regulation of T cell proliferation	56	0.0038	2	0.0099	0.138385	E	Cd274,Blm
GO:0034103	5,4	regulation of tissue remodeling	56	0.0038	2	0.0099	0.138385	E	Vdr,Enpp1
GO:0007243	7,6	protein kinase cascade	263	0.0179	5	0.0248	0.140859	E	Hipk3,Efna1,Cdc42ep5,Tlr4,Cbs
GO:0022414	3,2	reproductive process	543	0.037	8	0.0396	0.140869	E	Alms1,Hmgb2,Vdr,Fancd2,Trip13,Styx,Tgfbr1,Fbxo5
GO:0000003	2	reproduction	546	0.0372	8	0.0396	0.14127	E	Alms1,Hmgb2,Vdr,Fancd2,Trip13,Styx,Tgfbr1,Fbxo5
GO:0034962	6	cellular biopolymer catabolic process	551	0.0376	8	0.0396	0.141861	E	Mylip,Usp18,Usp51,Usp1,Dtl,Zmpste24,Uhrf1,Fbxo5
GO:0060135	4,5	maternal process involved in female pregnancy	12	0.0008	1	0.005	0.142051	E	Vdr
GO:0009132	8	nucleoside diphosphate metabolic process	12	0.0008	1	0.005	0.142051	E	Rrm2
GO:0031023	6,4,5	microtubule organizing center organization	12	0.0008	1	0.005	0.142051	E	Kif11
GO:0002820	7,5,6	negative regulation of adaptive immune response	12	0.0008	1	0.005	0.142051	E	Stat6
GO:0009409	5,4	response to cold	12	0.0008	1	0.005	0.142051	E	P2rx3
GO:0050892	5	intestinal absorption	12	0.0008	1	0.005	0.142051	E	Vdr
GO:0002823	8,6,7	negative regulation of adaptive immune response based on somatic recombination of immune receptors built from immunoglobulin superfamily domains	12	0.0008	1	0.005	0.142051	E	Stat6
GO:0002758	9,8,10,7,5	innate immune response-activating signal transduction	12	0.0008	1	0.005	0.142051	E	Tlr4
GO:0006631	5,7,6	fatty acid metabolic process	188	0.0128	4	0.0198	0.142156	E	Fads3,Echdc2,Dbt,Ptgs1
GO:0060562	8,7,6,9,5	epithelial tube morphogenesis	119	0.0081	3	0.0149	0.143667	E	Vdr,Stil,Pgf
GO:0002684	5,3,4	positive regulation of immune system process	192	0.0131	4	0.0198	0.146453	E	H60a,Blm,Stat6,Tlr4
GO:0048515	5,7,6	spermatid differentiation	59	0.004	2	0.0099	0.147519	E	Alms1,Trip13
GO:0055066	8	di-, tri-valent inorganic cation homeostasis	123	0.0084	3	0.0149	0.150263	E	Vdr,Slc30a4,Gpr12
GO:0044270	5	nitrogen compound catabolic process	60	0.0041	2	0.0099	0.150516	E	Ache,Sat1
GO:0009310	6	amine catabolic process	60	0.0041	2	0.0099	0.150516	E	Ache,Sat1
GO:0007346	6,5	regulation of mitotic cell cycle	60	0.0041	2	0.0099	0.150516	E	Cenpe,Fbxo5
GO:0060038	6,7	cardiac muscle cell proliferation	13	0.0009	1	0.005	0.151777	E	Hey2
GO:0006825	8,9	copper ion transport	13	0.0009	1	0.005	0.151777	E	Slc31a2
GO:0051262	7,6	protein tetramerization	13	0.0009	1	0.005	0.151777	E	Ache
GO:0046466	6,7	membrane lipid catabolic process	13	0.0009	1	0.005	0.151777	E	Smpd1
GO:0030149	7,8	sphingolipid catabolic process	13	0.0009	1	0.005	0.151777	E	Smpd1
GO:0034620	5,6	cellular response to unfolded protein	13	0.0009	1	0.005	0.151777	E	Eif2ak2
GO:0006693	8,10,9	prostaglandin metabolic process	13	0.0009	1	0.005	0.151777	E	Ptgs1
GO:0010948	6,7,5,4	negative regulation of cell cycle process	13	0.0009	1	0.005	0.151777	E	Cenpe
GO:0034105	6,4,5	positive regulation of tissue remodeling	13	0.0009	1	0.005	0.151777	E	Vdr
GO:0002218	8,9,4,6,7	activation of innate immune response	13	0.0009	1	0.005	0.151777	E	Tlr4
GO:0030968	8,7,6	endoplasmic reticulum unfolded protein response	13	0.0009	1	0.005	0.151777	E	Eif2ak2
GO:0006692	7,9,8	prostanoid metabolic process	13	0.0009	1	0.005	0.151777	E	Ptgs1
GO:0046640	10,9,8	regulation of alpha-beta T cell proliferation	13	0.0009	1	0.005	0.151777	E	Blm
GO:0002449	5,6	lymphocyte mediated immunity	124	0.0085	3	0.0149	0.15188	E	H60a,Exo1,Stat6
GO:0009966	6,5	regulation of signal transduction	501	0.0342	7	0.0347	0.152614	E	Ache,Hipk3,Arfgap3,Hey2,Ect2,Tlr4,Cbs
GO:0051094	5,3,4	positive regulation of developmental process	377	0.0257	6	0.0297	0.154501	E	Adamts9,H60a,Vdr,Hey2,Tgfb3,Tgfbr1
GO:0007264	7,6	small GTPase mediated signal transduction	381	0.026	6	0.0297	0.155814	E	Rab31,Rhov,Arfgap3,Ect2,Cdc42ep5,Rnd1
GO:0002682	4,3	regulation of immune system process	287	0.0196	5	0.0248	0.157065	E	H60a,Cd274,Blm,Stat6,Tlr4
GO:0051093	5,3,4	negative regulation of developmental process	392	0.0267	6	0.0297	0.158929	E	Hells,Tgfb3,Stil,Tgfbr1,Enpp1,Dicer1
GO:0001501	5	skeletal system development	294	0.0201	5	0.0248	0.160991	E	Kazald1,Vdr,Igfbp5,Tgfbr1,Enpp1
GO:0005975	4	carbohydrate metabolic process	402	0.0274	6	0.0297	0.161125	E	Gfpt1,Galt,Hyal1,Fut11,Ganab,Gusb
GO:0045191	9,5,10,11,8,13,12,4,7	regulation of isotype switching	14	0.001	1	0.005	0.161209	E	Stat6
GO:0032760	7,5,6	positive regulation of tumor necrosis factor production	14	0.001	1	0.005	0.161209	E	Tlr4
GO:0010623	5,6,4	developmental programmed cell death	14	0.001	1	0.005	0.161209	E	Vdr
GO:0046851	7,5,6	negative regulation of bone remodeling	14	0.001	1	0.005	0.161209	E	Enpp1
GO:0002717	9,8,10,7,6	positive regulation of natural killer cell mediated immunity	14	0.001	1	0.005	0.161209	E	H60a
GO:0070304	8,6,7,9,4,5	positive regulation of stress-activated protein kinase signaling pathway	14	0.001	1	0.005	0.161209	E	Tlr4
GO:0014855	5	striated muscle cell proliferation	14	0.001	1	0.005	0.161209	E	Hey2
GO:0048844	7,8,9,6	artery morphogenesis	14	0.001	1	0.005	0.161209	E	Tgfbr1
GO:0030071	8,7,10,6,9,5	regulation of mitotic metaphase/anaphase transition	14	0.001	1	0.005	0.161209	E	Cenpe
GO:0045954	7,11,12,8,10,9,5,6	positive regulation of natural killer cell mediated cytotoxicity	14	0.001	1	0.005	0.161209	E	H60a
GO:0046330	10,9,7,8,11,5,6	positive regulation of JNK cascade	14	0.001	1	0.005	0.161209	E	Tlr4
GO:0001763	5,4	morphogenesis of a branching structure	130	0.0089	3	0.0149	0.161298	E	Vdr,Pgf,Dicer1
GO:0001503	5,7,3	ossification	130	0.0089	3	0.0149	0.161298	E	Kazald1,Igfbp5,Enpp1
GO:0045444	5	fat cell differentiation	64	0.0044	2	0.0099	0.162231	E	Alms1,Enpp1
GO:0002706	8,6,7	regulation of lymphocyte mediated immunity	64	0.0044	2	0.0099	0.162231	E	H60a,Stat6
GO:0051098	4	regulation of binding	64	0.0044	2	0.0099	0.162231	E	Hipk3,Blm
GO:0043066	8,7,6,5	negative regulation of apoptosis	209	0.0143	4	0.0198	0.163077	E	Hells,Tgfb3,Stil,Tgfbr1
GO:0043009	5,6	chordate embryonic development	418	0.0285	6	0.0297	0.163399	E	Nasp,Gins1,Tgfb3,Stil,Etnk2,Tgfbr1
GO:0009792	4,5	embryonic development ending in birth or egg hatching	421	0.0287	6	0.0297	0.163658	E	Nasp,Gins1,Tgfb3,Stil,Etnk2,Tgfbr1
GO:0006814	7,8	sodium ion transport	132	0.009	3	0.0149	0.164322	E	Hcn2,Scn9a,Scn3b
GO:0007010	4	cytoskeleton organization	305	0.0208	5	0.0248	0.166384	E	Espl1,Pcdh15,Kif11,Cenpe,Fbxo5
GO:0043065	8,6,7	positive regulation of apoptosis	213	0.0145	4	0.0198	0.166568	E	H60a,Vdr,Tgfb3,Tgfbr1
GO:0043069	7,6,5,4	negative regulation of programmed cell death	214	0.0146	4	0.0198	0.167415	E	Hells,Tgfb3,Stil,Tgfbr1
GO:0043068	7,5,6	positive regulation of programmed cell death	215	0.0147	4	0.0198	0.16825	E	H60a,Vdr,Tgfb3,Tgfbr1
GO:0060548	6,4,5	negative regulation of cell death	215	0.0147	4	0.0198	0.16825	E	Hells,Tgfb3,Stil,Tgfbr1
GO:0010942	6,4,5	positive regulation of cell death	216	0.0147	4	0.0198	0.169075	E	H60a,Vdr,Tgfb3,Tgfbr1
GO:0043331	4	response to dsRNA	15	0.001	1	0.005	0.170353	E	Dicer1
GO:0009743	5	response to carbohydrate stimulus	15	0.001	1	0.005	0.170353	E	P2rx3
GO:0034104	6,4,5	negative regulation of tissue remodeling	15	0.001	1	0.005	0.170353	E	Enpp1
GO:0009084	7,8	glutamine family amino acid biosynthetic process	15	0.001	1	0.005	0.170353	E	Ass1
GO:0009395	6,7	phospholipid catabolic process	15	0.001	1	0.005	0.170353	E	Smpd1
GO:0001832	5,4,8,9	blastocyst growth	15	0.001	1	0.005	0.170353	E	Gins1
GO:0032729	7,5,6	positive regulation of interferon-gamma production	15	0.001	1	0.005	0.170353	E	H60a
GO:0007274	6,7	neuromuscular synaptic transmission	15	0.001	1	0.005	0.170353	E	P2rx3
GO:0006873	7,5	cellular ion homeostasis	218	0.0149	4	0.0198	0.170691	E	Hcn2,Serinc5,Vdr,Gpr12
GO:0051789	4	response to protein stimulus	67	0.0046	2	0.0099	0.170708	E	Creb3l2,Eif2ak2
GO:0060429	6,7,5	epithelium development	219	0.0149	4	0.0198	0.171483	E	Pcdh15,Vdr,Stil,Pgf
GO:0002009	7,6,8,5	morphogenesis of an epithelium	219	0.0149	4	0.0198	0.171483	E	Pcdh15,Vdr,Stil,Pgf
GO:0002443	4,5	leukocyte mediated immunity	137	0.0093	3	0.0149	0.17161	E	H60a,Exo1,Stat6
GO:0060348	4,6	bone development	138	0.0094	3	0.0149	0.17302	E	Kazald1,Igfbp5,Enpp1
GO:0002683	5,3,4	negative regulation of immune system process	68	0.0046	2	0.0099	0.17347	E	Cd274,Stat6
GO:0002703	7,5,6	regulation of leukocyte mediated immunity	68	0.0046	2	0.0099	0.17347	E	H60a,Stat6
GO:0001655	5	urogenital system development	139	0.0095	3	0.0149	0.174413	E	Hells,Pgf,Tgfbr1
GO:0030030	3	cell projection organization	331	0.0226	5	0.0248	0.175267	E	Alms1,Pcdh15,Efna1,Tgfb3,Tgfbr1
GO:0045934	7,5,6	negative regulation of nucleobase, nucleoside, nucleotide and nucleic acid metabolic process	333	0.0227	5	0.0248	0.175726	E	Bhlhe40,Hipk3,Vdr,Blm,Hells
GO:0002520	5,3	immune system development	334	0.0228	5	0.0248	0.175943	E	Blm,Hells,Tgfbr1,Exo1,Stat6
GO:0007596	6,4,5	blood coagulation	69	0.0047	2	0.0099	0.176199	E	Anxa5,Anxa2
GO:0010629	7,5,6	negative regulation of gene expression	339	0.0231	5	0.0248	0.176912	E	Bhlhe40,Hipk3,Vdr,Hells,Dicer1
GO:0000902	4,5,6	cell morphogenesis	346	0.0236	5	0.0248	0.177943	E	Pcdh15,Efna1,Ect2,Cdc42ep5,Cdc42se2
GO:0048646	3,5,4	anatomical structure formation involved in morphogenesis	354	0.0241	5	0.0248	0.178664	E	Serpine1,Stil,Pgf,Anxa2,Dicer1
GO:0044087	4,3	regulation of cellular component biogenesis	70	0.0048	2	0.0099	0.178895	E	Tgfb3,Tgfbr1
GO:0007599	5,4	hemostasis	70	0.0048	2	0.0099	0.178895	E	Anxa5,Anxa2
GO:0007093	7,6	mitotic cell cycle checkpoint	16	0.0011	1	0.005	0.179215	E	Cenpe
GO:0016101	7,8,5	diterpenoid metabolic process	16	0.0011	1	0.005	0.179215	E	Retsat
GO:0032755	7,5,6	positive regulation of interleukin-6 production	16	0.0011	1	0.005	0.179215	E	Tlr4
GO:0001964	6,4	startle response	16	0.0011	1	0.005	0.179215	E	Pcdh15
GO:0046633	8,7	alpha-beta T cell proliferation	16	0.0011	1	0.005	0.179215	E	Blm
GO:0006342	10,9,11,8,4,7	chromatin silencing	16	0.0011	1	0.005	0.179215	E	Hells
GO:0001523	8,9,6	retinoid metabolic process	16	0.0011	1	0.005	0.179215	E	Retsat
GO:0043123	9,10,8,7	positive regulation of I-kappaB kinase/NF-kappaB cascade	16	0.0011	1	0.005	0.179215	E	Tlr4
GO:0050974	8,6,5	detection of mechanical stimulus involved in sensory perception	16	0.0011	1	0.005	0.179215	E	Pcdh15
GO:0042325	8,7	regulation of phosphorylation	231	0.0158	4	0.0198	0.180109	E	Hipk3,Efna1,Cenpe,Cbs
GO:0006644	5,6	phospholipid metabolic process	144	0.0098	3	0.0149	0.181126	E	Serinc5,Smpd1,Etnk2
GO:0019226	5	transmission of nerve impulse	233	0.0159	4	0.0198	0.181387	E	Ache,Serinc5,P2rx3,Gria2
GO:0046942	5,6	carboxylic acid transport	71	0.0048	2	0.0099	0.181557	E	Slc1a4,Slc7a6
GO:0035295	4	tube development	235	0.016	4	0.0198	0.182619	E	Vdr,Stil,Pgf,Dicer1
GO:0019220	7,6	regulation of phosphate metabolic process	237	0.0162	4	0.0198	0.183804	E	Hipk3,Efna1,Cenpe,Cbs
GO:0051174	6,5	regulation of phosphorus metabolic process	237	0.0162	4	0.0198	0.183804	E	Hipk3,Efna1,Cenpe,Cbs
GO:0006874	10,8	cellular calcium ion homeostasis	72	0.0049	2	0.0099	0.184184	E	Vdr,Gpr12
GO:0006790	4	sulfur metabolic process	72	0.0049	2	0.0099	0.184184	E	Gstk1,Cbs
GO:0070662	5	mast cell proliferation	72	0.0049	2	0.0099	0.184184	E	Cd274,Blm
GO:0032944	7,6	regulation of mononuclear cell proliferation	72	0.0049	2	0.0099	0.184184	E	Cd274,Blm
GO:0015849	4,5	organic acid transport	72	0.0049	2	0.0099	0.184184	E	Slc1a4,Slc7a6
GO:0050670	8,7,6	regulation of lymphocyte proliferation	72	0.0049	2	0.0099	0.184184	E	Cd274,Blm
GO:0050817	3	coagulation	72	0.0049	2	0.0099	0.184184	E	Anxa5,Anxa2
GO:0070666	7,6	regulation of mast cell proliferation	72	0.0049	2	0.0099	0.184184	E	Cd274,Blm
GO:0007283	6,5	spermatogenesis	238	0.0162	4	0.0198	0.184379	E	Alms1,Hmgb2,Trip13,Styx
GO:0048232	5,4	male gamete generation	238	0.0162	4	0.0198	0.184379	E	Alms1,Hmgb2,Trip13,Styx
GO:0048469	5,6,4	cell maturation	73	0.005	2	0.0099	0.186776	E	Trip13,Fbxo5
GO:0006898	6,5,7	receptor-mediated endocytosis	17	0.0012	1	0.005	0.187803	E	Ache
GO:0006888	7,5,6	ER to Golgi vesicle-mediated transport	17	0.0012	1	0.005	0.187803	E	Sec23a
GO:0010552	11,10,12,9,8	positive regulation of specific transcription from RNA polymerase II promoter	17	0.0012	1	0.005	0.187803	E	Hmgb2
GO:0051495	7,5,6	positive regulation of cytoskeleton organization	17	0.0012	1	0.005	0.187803	E	Cenpe
GO:0006721	6,7,4	terpenoid metabolic process	17	0.0012	1	0.005	0.187803	E	Retsat
GO:0007129	6,10,8,7,9,5	synapsis	17	0.0012	1	0.005	0.187803	E	Fancd2
GO:0006305	8,7	DNA alkylation	17	0.0012	1	0.005	0.187803	E	Hells
GO:0006284	8,7	base-excision repair	17	0.0012	1	0.005	0.187803	E	Neil3
GO:0031109	6,5	microtubule polymerization or depolymerization	17	0.0012	1	0.005	0.187803	E	Fbxo5
GO:0051054	8,7,6,5	positive regulation of DNA metabolic process	17	0.0012	1	0.005	0.187803	E	Stat6
GO:0006595	7	polyamine metabolic process	17	0.0012	1	0.005	0.187803	E	Sat1
GO:0009262	8	deoxyribonucleotide metabolic process	17	0.0012	1	0.005	0.187803	E	Rrm2
GO:0051053	8,7,6,5	negative regulation of DNA metabolic process	17	0.0012	1	0.005	0.187803	E	Blm
GO:0006306	8,7,9	DNA methylation	17	0.0012	1	0.005	0.187803	E	Hells
GO:0070192	5,9,7,8,6,4	chromosome organization involved in meiosis	17	0.0012	1	0.005	0.187803	E	Fancd2
GO:0070663	6,5	regulation of leukocyte proliferation	74	0.005	2	0.0099	0.189332	E	Cd274,Blm
GO:0032787	6	monocarboxylic acid metabolic process	248	0.0169	4	0.0198	0.189495	E	Fads3,Echdc2,Dbt,Ptgs1
GO:0055080	7	cation homeostasis	152	0.0104	3	0.0149	0.190955	E	Vdr,Slc30a4,Gpr12
GO:0055074	9	calcium ion homeostasis	76	0.0052	2	0.0099	0.194335	E	Vdr,Gpr12
GO:0006541	7,8	glutamine metabolic process	18	0.0012	1	0.005	0.19612	E	Gfpt1
GO:0006809	6,5	nitric oxide biosynthetic process	18	0.0012	1	0.005	0.19612	E	H60a
GO:0045814	8,6,7	negative regulation of gene expression, epigenetic	18	0.0012	1	0.005	0.19612	E	Hells
GO:0030148	6,7,8	sphingolipid biosynthetic process	18	0.0012	1	0.005	0.19612	E	Lass6
GO:0000077	8,7	DNA damage checkpoint	18	0.0012	1	0.005	0.19612	E	Chek1
GO:0000096	6,7,5	sulfur amino acid metabolic process	18	0.0012	1	0.005	0.19612	E	Cbs
GO:0006637	6,8,7	acyl-CoA metabolic process	18	0.0012	1	0.005	0.19612	E	Dbt
GO:0022600	4	digestive system process	18	0.0012	1	0.005	0.19612	E	Vdr
GO:0050982	5	detection of mechanical stimulus	18	0.0012	1	0.005	0.19612	E	Pcdh15
GO:0042133	5,7,8,4	neurotransmitter metabolic process	18	0.0012	1	0.005	0.19612	E	Ache
GO:0006304	7,6	DNA modification	18	0.0012	1	0.005	0.19612	E	Hells
GO:0030308	6,7,4,5	negative regulation of cell growth	18	0.0012	1	0.005	0.19612	E	Tro
GO:0046209	4	nitric oxide metabolic process	18	0.0012	1	0.005	0.19612	E	H60a
GO:0006917	9,7,8	induction of apoptosis	157	0.0107	3	0.0149	0.196507	E	H60a,Tgfb3,Tgfbr1
GO:0012502	8,6,7	induction of programmed cell death	157	0.0107	3	0.0149	0.196507	E	H60a,Tgfb3,Tgfbr1
GO:0009607	3	response to biotic stimulus	270	0.0184	4	0.0198	0.196711	E	H60a,Creb3l2,Tlr4,Eif2ak2
GO:0043086	5	negative regulation of catalytic activity	77	0.0053	2	0.0099	0.196781	E	Hipk3,Fbxo5
GO:0030879	6,7	mammary gland development	77	0.0053	2	0.0099	0.196781	E	Vdr,Tgfb3
GO:0006066	4	cellular alcohol metabolic process	283	0.0193	4	0.0198	0.198474	E	Galt,Ddc,Etnk2,Sgpp1
GO:0008654	5,6,7	phospholipid biosynthetic process	78	0.0053	2	0.0099	0.199189	E	Serinc5,Etnk2
GO:0042098	7,6	T cell proliferation	78	0.0053	2	0.0099	0.199189	E	Cd274,Blm
GO:0016064	7,8	immunoglobulin mediated immune response	80	0.0055	2	0.0099	0.203893	E	Exo1,Stat6
GO:0031347	6,5	regulation of defense response	80	0.0055	2	0.0099	0.203893	E	H60a,Tlr4
GO:0006875	9,7	cellular metal ion homeostasis	80	0.0055	2	0.0099	0.203893	E	Vdr,Gpr12
GO:0048701	7,8,9,6	embryonic cranial skeleton morphogenesis	19	0.0013	1	0.005	0.204174	E	Tgfbr1
GO:0007140	9,7,8,6	male meiosis	19	0.0013	1	0.005	0.204174	E	Trip13
GO:0043407	12,9,11	negative regulation of MAP kinase activity	19	0.0013	1	0.005	0.204174	E	Hipk3
GO:0002715	9,7,8,6	regulation of natural killer cell mediated immunity	19	0.0013	1	0.005	0.204174	E	H60a
GO:0035116	8,7	embryonic hindlimb morphogenesis	19	0.0013	1	0.005	0.204174	E	Dicer1
GO:0048545	5	response to steroid hormone stimulus	19	0.0013	1	0.005	0.204174	E	Hmgb2
GO:0042269	11,6,8,10,9,5,7	regulation of natural killer cell mediated cytotoxicity	19	0.0013	1	0.005	0.204174	E	H60a
GO:0051186	4	cofactor metabolic process	166	0.0113	3	0.0149	0.205322	E	Isca1,Gstk1,Dbt
GO:0001890	5,6	placenta development	81	0.0055	2	0.0099	0.206186	E	Ccnf,Etnk2
GO:0002697	6,4,5	regulation of immune effector process	82	0.0056	2	0.0099	0.208442	E	H60a,Stat6
GO:0019724	6,7	B cell mediated immunity	82	0.0056	2	0.0099	0.208442	E	Exo1,Stat6
GO:0048589	3	developmental growth	83	0.0057	2	0.0099	0.210658	E	Alms1,Gins1
GO:0046467	5,6,7	membrane lipid biosynthetic process	20	0.0014	1	0.005	0.211969	E	Lass6
GO:0060444	8,7,9,10,11,6	branching involved in mammary gland duct morphogenesis	20	0.0014	1	0.005	0.211969	E	Vdr
GO:0000723	6,7	telomere maintenance	20	0.0014	1	0.005	0.211969	E	Blm
GO:0033002	4	muscle cell proliferation	20	0.0014	1	0.005	0.211969	E	Hey2
GO:0030101	6,5	natural killer cell activation	20	0.0014	1	0.005	0.211969	E	H60a
GO:0032200	5	telomere organization	20	0.0014	1	0.005	0.211969	E	Blm
GO:0002252	3,4	immune effector process	175	0.0119	3	0.0149	0.212607	E	H60a,Exo1,Stat6
GO:0051188	5	cofactor biosynthetic process	84	0.0057	2	0.0099	0.212835	E	Isca1,Dbt
GO:0050776	5,4	regulation of immune response	177	0.0121	3	0.0149	0.214019	E	H60a,Stat6,Tlr4
GO:0006461	5,4	protein complex assembly	178	0.0121	3	0.0149	0.214696	E	Ache,Rrm2,Fbxo5
GO:0070271	3	protein complex biogenesis	178	0.0121	3	0.0149	0.214696	E	Ache,Rrm2,Fbxo5
GO:0070085	5	glycosylation	85	0.0058	2	0.0099	0.214973	E	Fut11,Ganab
GO:0043413	6	biopolymer glycosylation	85	0.0058	2	0.0099	0.214973	E	Fut11,Ganab
GO:0006486	7,5,8,6	protein amino acid glycosylation	85	0.0058	2	0.0099	0.214973	E	Fut11,Ganab
GO:0055065	8	metal ion homeostasis	86	0.0059	2	0.0099	0.217071	E	Vdr,Gpr12
GO:0048732	5,6	gland development	182	0.0124	3	0.0149	0.21722	E	Vdr,Tgfb3,Tgfbr1
GO:0051171	5,4	regulation of nitrogen compound metabolic process	21	0.0014	1	0.005	0.219511	E	H60a
GO:0019827	7,6,5,3	stem cell maintenance	21	0.0014	1	0.005	0.219511	E	Dicer1
GO:0034976	5	response to endoplasmic reticulum stress	21	0.0014	1	0.005	0.219511	E	Eif2ak2
GO:0042462	10,7,11,8,9	eye photoreceptor cell development	21	0.0014	1	0.005	0.219511	E	Alms1
GO:0045787	6,4,5	positive regulation of cell cycle	21	0.0014	1	0.005	0.219511	E	Cenpe
GO:0032312	10,11,8,9	regulation of ARF GTPase activity	21	0.0014	1	0.005	0.219511	E	Arfgap3
GO:0031570	7,6	DNA integrity checkpoint	21	0.0014	1	0.005	0.219511	E	Chek1
GO:0006984	7,6	ER-nuclear signaling pathway	21	0.0014	1	0.005	0.219511	E	Eif2ak2
GO:0070507	7,6,5	regulation of microtubule cytoskeleton organization	21	0.0014	1	0.005	0.219511	E	Cenpe
GO:0030318	6,5	melanocyte differentiation	21	0.0014	1	0.005	0.219511	E	Adamts9
GO:0050878	4,3	regulation of body fluid levels	88	0.006	2	0.0099	0.221148	E	Anxa5,Anxa2
GO:0007268	5,6	synaptic transmission	194	0.0132	3	0.0149	0.223037	E	Ache,P2rx3,Gria2
GO:0040008	4,3	regulation of growth	196	0.0134	3	0.0149	0.223756	E	Kazald1,Igfbp5,Tro
GO:0007265	8,7	Ras protein signal transduction	197	0.0134	3	0.0149	0.22409	E	Arfgap3,Ect2,Cdc42ep5
GO:0009628	3	response to abiotic stimulus	200	0.0136	3	0.0149	0.224989	E	Pcdh15,Rad54l,P2rx3
GO:0048771	3	tissue remodeling	90	0.0061	2	0.0099	0.225065	E	Vdr,Enpp1
GO:0043122	8,9,7	regulation of I-kappaB kinase/NF-kappaB cascade	22	0.0015	1	0.005	0.226807	E	Tlr4
GO:0006749	6,5	glutathione metabolic process	22	0.0015	1	0.005	0.226807	E	Gstk1
GO:0050931	5,4	pigment cell differentiation	22	0.0015	1	0.005	0.226807	E	Adamts9
GO:0048864	5,6	stem cell development	22	0.0015	1	0.005	0.226807	E	Dicer1
GO:0031047	9,4,7,8	gene silencing by RNA	22	0.0015	1	0.005	0.226807	E	Dicer1
GO:0006776	6	vitamin A metabolic process	22	0.0015	1	0.005	0.226807	E	Retsat
GO:0006487	8,6,9,7	protein amino acid N-linked glycosylation	22	0.0015	1	0.005	0.226807	E	Ganab
GO:0007507	5,6	heart development	211	0.0144	3	0.0149	0.227003	E	Hey2,Stil,Tgfbr1
GO:0007605	8	sensory perception of sound	92	0.0063	2	0.0099	0.228822	E	Alms1,Pcdh15
GO:0009101	6	glycoprotein biosynthetic process	94	0.0064	2	0.0099	0.232419	E	Fut11,Ganab
GO:0045860	11,8,10	positive regulation of protein kinase activity	94	0.0064	2	0.0099	0.232419	E	Efna1,Cenpe
GO:0032640	4	tumor necrosis factor production	23	0.0016	1	0.005	0.23386	E	Tlr4
GO:0007595	7,8,5,4	lactation	23	0.0016	1	0.005	0.23386	E	Vdr
GO:0006289	8,7	nucleotide-excision repair	23	0.0016	1	0.005	0.23386	E	Neil3
GO:0055092	7	sterol homeostasis	23	0.0016	1	0.005	0.23386	E	Alms1
GO:0050777	6,4,5	negative regulation of immune response	23	0.0016	1	0.005	0.23386	E	Stat6
GO:0031343	5,3,4	positive regulation of cell killing	23	0.0016	1	0.005	0.23386	E	H60a
GO:0032680	6,5	regulation of tumor necrosis factor production	23	0.0016	1	0.005	0.23386	E	Tlr4
GO:0001912	6,7,8,4,5	positive regulation of leukocyte mediated cytotoxicity	23	0.0016	1	0.005	0.23386	E	H60a
GO:0001754	9,10,7,8,6	eye photoreceptor cell differentiation	23	0.0016	1	0.005	0.23386	E	Alms1
GO:0042491	10,11,8,6,9	auditory receptor cell differentiation	23	0.0016	1	0.005	0.23386	E	Pcdh15
GO:0060688	6,5,4	regulation of morphogenesis of a branching structure	23	0.0016	1	0.005	0.23386	E	Pgf
GO:0048538	6,7,5	thymus development	23	0.0016	1	0.005	0.23386	E	Tgfbr1
GO:0042632	8	cholesterol homeostasis	23	0.0016	1	0.005	0.23386	E	Alms1
GO:0045786	6,4,5	negative regulation of cell cycle	23	0.0016	1	0.005	0.23386	E	Cenpe
GO:0007266	9,8	Rho protein signal transduction	95	0.0065	2	0.0099	0.234157	E	Ect2,Cdc42ep5
GO:0044092	4	negative regulation of molecular function	95	0.0065	2	0.0099	0.234157	E	Hipk3,Fbxo5
GO:0006730	4	one-carbon compound metabolic process	97	0.0066	2	0.0099	0.237513	E	Shmt1,Hells
GO:0021700	3	developmental maturation	98	0.0067	2	0.0099	0.239131	E	Trip13,Fbxo5
GO:0042060	5	wound healing	98	0.0067	2	0.0099	0.239131	E	Anxa5,Anxa2
GO:0042267	10,4,8,9,5,7,6	natural killer cell mediated cytotoxicity	24	0.0016	1	0.005	0.240676	E	H60a
GO:0045792	5	negative regulation of cell size	24	0.0016	1	0.005	0.240676	E	Tro
GO:0001947	7,8,6	heart looping	24	0.0016	1	0.005	0.240676	E	Stil
GO:0019722	8,7	calcium-mediated signaling	24	0.0016	1	0.005	0.240676	E	Alms1
GO:0002228	6,7,5	natural killer cell mediated immunity	24	0.0016	1	0.005	0.240676	E	H60a
GO:0043193	10,9,11,8,7	positive regulation of gene-specific transcription	24	0.0016	1	0.005	0.240676	E	Hmgb2
GO:0043112	4	receptor metabolic process	24	0.0016	1	0.005	0.240676	E	Ache
GO:0033674	10,7,9	positive regulation of kinase activity	99	0.0068	2	0.0099	0.240709	E	Efna1,Cenpe
GO:0051347	6	positive regulation of transferase activity	100	0.0068	2	0.0099	0.242248	E	Efna1,Cenpe
GO:0050954	7	sensory perception of mechanical stimulus	101	0.0069	2	0.0099	0.243747	E	Alms1,Pcdh15
GO:0050863	8,7,6	regulation of T cell activation	102	0.007	2	0.0099	0.245206	E	Cd274,Blm
GO:0009725	4	response to hormone stimulus	103	0.007	2	0.0099	0.246626	E	Hmgb2,Stxbp4
GO:0006470	9,7,8	protein amino acid dephosphorylation	103	0.007	2	0.0099	0.246626	E	Ptprr,Styx
GO:0051783	6,5	regulation of nuclear division	25	0.0017	1	0.005	0.247261	E	Cenpe
GO:0046456	8,7,9,6	icosanoid biosynthetic process	25	0.0017	1	0.005	0.247261	E	Ptgs1
GO:0007088	7,6,9,8,5	regulation of mitosis	25	0.0017	1	0.005	0.247261	E	Cenpe
GO:0002637	8,6,7	regulation of immunoglobulin production	25	0.0017	1	0.005	0.247261	E	Stat6
GO:0009798	5,4	axis specification	25	0.0017	1	0.005	0.247261	E	Stil
GO:0042391	8,6	regulation of membrane potential	105	0.0072	2	0.0099	0.249348	E	Hcn2,Serinc5
GO:0001822	5,6	kidney development	105	0.0072	2	0.0099	0.249348	E	Pgf,Tgfbr1
GO:0009100	5	glycoprotein metabolic process	106	0.0072	2	0.0099	0.250651	E	Fut11,Ganab
GO:0007601	8	visual perception	107	0.0073	2	0.0099	0.251915	E	Pcdh15,Cnga3
GO:0050953	7	sensory perception of light stimulus	108	0.0074	2	0.0099	0.25314	E	Pcdh15,Cnga3
GO:0032649	6,5	regulation of interferon-gamma production	26	0.0018	1	0.005	0.25362	E	H60a
GO:0042461	9,6,10,7	photoreceptor cell development	26	0.0018	1	0.005	0.25362	E	Alms1
GO:0042130	10,9,8,7	negative regulation of T cell proliferation	26	0.0018	1	0.005	0.25362	E	Cd274
GO:0046635	10,9,8,7	positive regulation of alpha-beta T cell activation	26	0.0018	1	0.005	0.25362	E	Blm
GO:0060603	7,9,8,10,6	mammary gland duct morphogenesis	26	0.0018	1	0.005	0.25362	E	Vdr
GO:0001932	8,9,10,7	regulation of protein amino acid phosphorylation	109	0.0074	2	0.0099	0.254328	E	Hipk3,Cbs
GO:0030005	9,7	cellular di-, tri-valent inorganic cation homeostasis	111	0.0076	2	0.0099	0.256588	E	Vdr,Gpr12
GO:0001817	5,4	regulation of cytokine production	114	0.0078	2	0.0099	0.259697	E	H60a,Tlr4
GO:0042113	6,5	B cell activation	114	0.0078	2	0.0099	0.259697	E	Exo1,Stat6
GO:0060249	5	anatomical structure homeostasis	114	0.0078	2	0.0099	0.259697	E	Blm,Dicer1
GO:0032675	6,5	regulation of interleukin-6 production	27	0.0018	1	0.005	0.259757	E	Tlr4
GO:0007628	5,6	adult walking behavior	27	0.0018	1	0.005	0.259757	E	Pcdh15
GO:0009612	4	response to mechanical stimulus	27	0.0018	1	0.005	0.259757	E	Pcdh15
GO:0006672	8,9	ceramide metabolic process	27	0.0018	1	0.005	0.259757	E	Lass6
GO:0006457	7,6	protein folding	115	0.0078	2	0.0099	0.260659	E	Fkbp14,Fkbp7
GO:0006511	10,8,9	ubiquitin-dependent protein catabolic process	116	0.0079	2	0.0099	0.261585	E	Usp18,Usp1
GO:0002460	5	adaptive immune response based on somatic recombination of immune receptors built from immunoglobulin superfamily domains	120	0.0082	2	0.0099	0.264927	E	Exo1,Stat6
GO:0002250	4	adaptive immune response	120	0.0082	2	0.0099	0.264927	E	Exo1,Stat6
GO:0009719	3	response to endogenous stimulus	121	0.0083	2	0.0099	0.265674	E	Hmgb2,Stxbp4
GO:0001658	7,9,8,6,10,5	branching involved in ureteric bud morphogenesis	28	0.0019	1	0.005	0.265677	E	Pgf
GO:0007586	3	digestion	28	0.0019	1	0.005	0.265677	E	Vdr
GO:0009408	5,4	response to heat	28	0.0019	1	0.005	0.265677	E	P2rx3
GO:0060675	5,8,9,4	ureteric bud morphogenesis	28	0.0019	1	0.005	0.265677	E	Pgf
GO:0030003	8,6	cellular cation homeostasis	122	0.0083	2	0.0099	0.266386	E	Vdr,Gpr12
GO:0045087	4,5	innate immune response	122	0.0083	2	0.0099	0.266386	E	H60a,Tlr4
GO:0055085	3,4,5	transmembrane transport	123	0.0084	2	0.0099	0.267064	E	Atp6v0e2,Sil1
GO:0016042	4,5	lipid catabolic process	125	0.0085	2	0.0099	0.268317	E	Smpd1,Pld4
GO:0016311	6	dephosphorylation	127	0.0087	2	0.0099	0.269435	E	Ptprr,Styx
GO:0050778	6,4,5	positive regulation of immune response	129	0.0088	2	0.0099	0.270422	E	H60a,Tlr4
GO:0006816	7,8	calcium ion transport	129	0.0088	2	0.0099	0.270422	E	Vdr,Trpc7
GO:0031399	7,8,6	regulation of protein modification process	129	0.0088	2	0.0099	0.270422	E	Hipk3,Cbs
GO:0002700	7,5,6	regulation of production of molecular mediator of immune response	29	0.002	1	0.005	0.271385	E	Stat6
GO:0006775	5	fat-soluble vitamin metabolic process	29	0.002	1	0.005	0.271385	E	Retsat
GO:0007623	3	circadian rhythm	29	0.002	1	0.005	0.271385	E	Nr1d1
GO:0001666	5,4	response to hypoxia	29	0.002	1	0.005	0.271385	E	P2rx3
GO:0032635	4	interleukin-6 production	29	0.002	1	0.005	0.271385	E	Tlr4
GO:0006732	5	coenzyme metabolic process	133	0.0091	2	0.0099	0.272012	E	Gstk1,Dbt
GO:0030098	6,8,9,7,5	lymphocyte differentiation	135	0.0092	2	0.0099	0.27262	E	Blm,Hells
GO:0060284	6,5	regulation of cell development	135	0.0092	2	0.0099	0.27262	E	Vdr,Efna1
GO:0001816	3	cytokine production	144	0.0098	2	0.0099	0.273909	E	H60a,Tlr4
GO:0070667	8,6,7	negative regulation of mast cell proliferation	30	0.002	1	0.005	0.276886	E	Cd274
GO:0002712	8,9,7	regulation of B cell mediated immunity	30	0.002	1	0.005	0.276886	E	Stat6
GO:0070482	4	response to oxygen levels	30	0.002	1	0.005	0.276886	E	P2rx3
GO:0043388	6	positive regulation of DNA binding	30	0.002	1	0.005	0.276886	E	Hipk3
GO:0048863	5	stem cell differentiation	30	0.002	1	0.005	0.276886	E	Dicer1
GO:0060113	9,10,7,5,8	inner ear receptor cell differentiation	30	0.002	1	0.005	0.276886	E	Pcdh15
GO:0032886	5,4	regulation of microtubule-based process	30	0.002	1	0.005	0.276886	E	Cenpe
GO:0055088	6	lipid homeostasis	30	0.002	1	0.005	0.276886	E	Alms1
GO:0031341	4,3	regulation of cell killing	30	0.002	1	0.005	0.276886	E	H60a
GO:0018958	5	phenol metabolic process	30	0.002	1	0.005	0.276886	E	Ddc
GO:0010638	6,4,5	positive regulation of organelle organization	30	0.002	1	0.005	0.276886	E	Cenpe
GO:0010212	5	response to ionizing radiation	30	0.002	1	0.005	0.276886	E	Rad54l
GO:0044272	5	sulfur compound biosynthetic process	30	0.002	1	0.005	0.276886	E	Cbs
GO:0046530	8,9,6	photoreceptor cell differentiation	30	0.002	1	0.005	0.276886	E	Alms1
GO:0006584	6,7	catecholamine metabolic process	30	0.002	1	0.005	0.276886	E	Ddc
GO:0002889	9,10,8	regulation of immunoglobulin mediated immune response	30	0.002	1	0.005	0.276886	E	Stat6
GO:0001910	5,7,4,6	regulation of leukocyte mediated cytotoxicity	30	0.002	1	0.005	0.276886	E	H60a
GO:0006690	6,8,7	icosanoid metabolic process	30	0.002	1	0.005	0.276886	E	Ptgs1
GO:0008286	9,8,6,7	insulin receptor signaling pathway	30	0.002	1	0.005	0.276886	E	Stxbp4
GO:0042552	13,9,11,5,8	myelination	31	0.0021	1	0.005	0.282185	E	Serinc5
GO:0050672	9,8,7,6	negative regulation of lymphocyte proliferation	31	0.0021	1	0.005	0.282185	E	Cd274
GO:0070664	7,5,6	negative regulation of leukocyte proliferation	31	0.0021	1	0.005	0.282185	E	Cd274
GO:0032945	8,6,7	negative regulation of mononuclear cell proliferation	31	0.0021	1	0.005	0.282185	E	Cd274
GO:0060041	8,4,9	retina development in camera-type eye	31	0.0021	1	0.005	0.282185	E	Ache
GO:0006997	4	nucleus organization	32	0.0022	1	0.005	0.287285	E	Zmpste24
GO:0009636	4	response to toxin	32	0.0022	1	0.005	0.287285	E	Ddc
GO:0006641	7,6,8	triglyceride metabolic process	32	0.0022	1	0.005	0.287285	E	Alms1
GO:0051099	5	positive regulation of binding	32	0.0022	1	0.005	0.287285	E	Hipk3
GO:0035137	7,6	hindlimb morphogenesis	32	0.0022	1	0.005	0.287285	E	Dicer1
GO:0019748	3	secondary metabolic process	32	0.0022	1	0.005	0.287285	E	Retsat
GO:0042102	10,9,8,7	positive regulation of T cell proliferation	33	0.0023	1	0.005	0.292191	E	Blm
GO:0032496	6,5,7	response to lipopolysaccharide	33	0.0023	1	0.005	0.292191	E	Tlr4
GO:0006720	5,6	isoprenoid metabolic process	33	0.0023	1	0.005	0.292191	E	Retsat
GO:0048193	6,4,5	Golgi vesicle transport	33	0.0023	1	0.005	0.292191	E	Sec23a
GO:0008366	12,8,10,4,7	axon ensheathment	33	0.0023	1	0.005	0.292191	E	Serinc5
GO:0007272	11,7,9,3,6	ensheathment of neurons	33	0.0023	1	0.005	0.292191	E	Serinc5
GO:0050871	9,8,7,6	positive regulation of B cell activation	33	0.0023	1	0.005	0.292191	E	Stat6
GO:0060021	4	palate development	34	0.0023	1	0.005	0.296908	E	Tgfbr1
GO:0046634	9,8,7	regulation of alpha-beta T cell activation	34	0.0023	1	0.005	0.296908	E	Blm
GO:0045765	5,6,7,8,9,10,4	regulation of angiogenesis	34	0.0023	1	0.005	0.296908	E	Serpine1
GO:0032011	9,8	ARF protein signal transduction	34	0.0023	1	0.005	0.296908	E	Arfgap3
GO:0032012	9,10,8	regulation of ARF protein signal transduction	34	0.0023	1	0.005	0.296908	E	Arfgap3
GO:0006939	6	smooth muscle contraction	35	0.0024	1	0.005	0.30144	E	P2rx3
GO:0016050	4	vesicle organization	35	0.0024	1	0.005	0.30144	E	Fbxo5
GO:0008584	6,7,8	male gonad development	35	0.0024	1	0.005	0.30144	E	Hmgb2
GO:0045926	5,3,4	negative regulation of growth	35	0.0024	1	0.005	0.30144	E	Tro
GO:0046632	8,10,11,9,7	alpha-beta T cell differentiation	35	0.0024	1	0.005	0.30144	E	Blm
GO:0043410	9,10,8,7	positive regulation of MAPKKK cascade	35	0.0024	1	0.005	0.30144	E	Tlr4
GO:0015985	5,6,8,7,9	energy coupled proton transport, down electrochemical gradient	35	0.0024	1	0.005	0.30144	E	Atp6v0e2
GO:0048167	8,9,7	regulation of synaptic plasticity	35	0.0024	1	0.005	0.30144	E	P2rx3
GO:0015986	6,13,8,7,9,10	ATP synthesis coupled proton transport	35	0.0024	1	0.005	0.30144	E	Atp6v0e2
GO:0015758	7,8	glucose transport	36	0.0025	1	0.005	0.305791	E	Stxbp4
GO:0050770	7,8,10,9,6,12,11,13	regulation of axonogenesis	36	0.0025	1	0.005	0.305791	E	Efna1
GO:0042108	8,7,6,5	positive regulation of cytokine biosynthetic process	36	0.0025	1	0.005	0.305791	E	Tlr4
GO:0042490	8,9,6	mechanoreceptor differentiation	36	0.0025	1	0.005	0.305791	E	Pcdh15
GO:0048066	3	pigmentation during development	36	0.0025	1	0.005	0.305791	E	Adamts9
GO:0060443	6,7,8,5	mammary gland morphogenesis	36	0.0025	1	0.005	0.305791	E	Vdr
GO:0019228	10,6,8	regulation of action potential in neuron	37	0.0025	1	0.005	0.309966	E	Serinc5
GO:0008645	6,7	hexose transport	37	0.0025	1	0.005	0.309966	E	Stxbp4
GO:0006639	6,5,7	acylglycerol metabolic process	37	0.0025	1	0.005	0.309966	E	Alms1
GO:0015749	5,6	monosaccharide transport	37	0.0025	1	0.005	0.309966	E	Stxbp4
GO:0034220	4,5,6	ion transmembrane transport	38	0.0026	1	0.005	0.313967	E	Atp6v0e2
GO:0042593	7	glucose homeostasis	38	0.0026	1	0.005	0.313967	E	Alms1
GO:0033500	6	carbohydrate homeostasis	38	0.0026	1	0.005	0.313967	E	Alms1
GO:0046486	5,6	glycerolipid metabolic process	38	0.0026	1	0.005	0.313967	E	Alms1
GO:0032569	10,8,9	specific transcription from RNA polymerase II promoter	39	0.0027	1	0.005	0.3178	E	Hmgb2
GO:0050885	6	neuromuscular process controlling balance	39	0.0027	1	0.005	0.3178	E	Pcdh15
GO:0006638	5,6	neutral lipid metabolic process	39	0.0027	1	0.005	0.3178	E	Alms1
GO:0002708	8,9,6,7	positive regulation of lymphocyte mediated immunity	39	0.0027	1	0.005	0.3178	E	H60a
GO:0002705	7,8,5,6	positive regulation of leukocyte mediated immunity	39	0.0027	1	0.005	0.3178	E	H60a
GO:0050868	9,8,7,6	negative regulation of T cell activation	39	0.0027	1	0.005	0.3178	E	Cd274
GO:0006662	4	glycerol ether metabolic process	39	0.0027	1	0.005	0.3178	E	Alms1
GO:0010551	10,9,11,8	regulation of specific transcription from RNA polymerase II promoter	39	0.0027	1	0.005	0.3178	E	Hmgb2
GO:0042770	7,6	DNA damage response, signal transduction	40	0.0027	1	0.005	0.321467	E	Chek1
GO:0001906	2	cell killing	40	0.0027	1	0.005	0.321467	E	H60a
GO:0033673	10,7,9	negative regulation of kinase activity	40	0.0027	1	0.005	0.321467	E	Hipk3
GO:0006469	11,8,10	negative regulation of protein kinase activity	40	0.0027	1	0.005	0.321467	E	Hipk3
GO:0002237	5,4,6	response to molecule of bacterial origin	40	0.0027	1	0.005	0.321467	E	Tlr4
GO:0001909	3,4,5	leukocyte mediated cytotoxicity	40	0.0027	1	0.005	0.321467	E	H60a
GO:0002455	8,5,9	humoral immune response mediated by circulating immunoglobulin	41	0.0028	1	0.005	0.324973	E	Exo1
GO:0002274	5,4	myeloid leukocyte activation	41	0.0028	1	0.005	0.324973	E	H60a
GO:0001657	7,8,4	ureteric bud development	41	0.0028	1	0.005	0.324973	E	Pgf
GO:0001570	5,7,8,9,6	vasculogenesis	41	0.0028	1	0.005	0.324973	E	Hey2
GO:0000187	13,9,10,8,12	activation of MAPK activity	41	0.0028	1	0.005	0.324973	E	Efna1
GO:0007249	8,7	I-kappaB kinase/NF-kappaB cascade	42	0.0029	1	0.005	0.328322	E	Tlr4
GO:0010975	6,9,8,5,10,7,11	regulation of neuron projection development	42	0.0029	1	0.005	0.328322	E	Efna1
GO:0051348	6	negative regulation of transferase activity	42	0.0029	1	0.005	0.328322	E	Hipk3
GO:0043524	9,8,7,6	negative regulation of neuron apoptosis	43	0.0029	1	0.005	0.331517	E	Tgfb3
GO:0032869	5,6,7	cellular response to insulin stimulus	43	0.0029	1	0.005	0.331517	E	Stxbp4
GO:0001649	5,6,8,4	osteoblast differentiation	44	0.003	1	0.005	0.334562	E	Igfbp5
GO:0007368	7,6	determination of left/right symmetry	44	0.003	1	0.005	0.334562	E	Stil
GO:0050671	9,8,7,6	positive regulation of lymphocyte proliferation	45	0.0031	1	0.005	0.337459	E	Blm
GO:0002699	6,7,4,5	positive regulation of immune effector process	45	0.0031	1	0.005	0.337459	E	H60a
GO:0001508	9,7	regulation of action potential	45	0.0031	1	0.005	0.337459	E	Serinc5
GO:0032946	8,6,7	positive regulation of mononuclear cell proliferation	45	0.0031	1	0.005	0.337459	E	Blm
GO:0009799	5,4	determination of symmetry	45	0.0031	1	0.005	0.337459	E	Stil
GO:0009855	6,5	determination of bilateral symmetry	45	0.0031	1	0.005	0.337459	E	Stil
GO:0009266	4	response to temperature stimulus	45	0.0031	1	0.005	0.337459	E	P2rx3
GO:0010769	6,7,5,8	regulation of cell morphogenesis involved in differentiation	46	0.0031	1	0.005	0.340214	E	Efna1
GO:0048663	8,9,6,5	neuron fate commitment	46	0.0031	1	0.005	0.340214	E	Tgfbr1
GO:0007224	7,6	smoothened signaling pathway	46	0.0031	1	0.005	0.340214	E	Stil
GO:0030278	5,7,6,8,4	regulation of ossification	46	0.0031	1	0.005	0.340214	E	Enpp1
GO:0051250	8,7,6,5	negative regulation of lymphocyte activation	47	0.0032	1	0.005	0.342828	E	Cd274
GO:0046546	5,6,7	development of primary male sexual characteristics	47	0.0032	1	0.005	0.342828	E	Hmgb2
GO:0046777	10,8,9	protein amino acid autophosphorylation	47	0.0032	1	0.005	0.342828	E	Eif2ak2
GO:0002695	7,6,5,4	negative regulation of leukocyte activation	47	0.0032	1	0.005	0.342828	E	Cd274
GO:0070665	7,5,6	positive regulation of leukocyte proliferation	47	0.0032	1	0.005	0.342828	E	Blm
GO:0070668	8,6,7	positive regulation of mast cell proliferation	47	0.0032	1	0.005	0.342828	E	Blm
GO:0050866	6,4,5	negative regulation of cell activation	47	0.0032	1	0.005	0.342828	E	Cd274
GO:0006909	6,5,7	phagocytosis	47	0.0032	1	0.005	0.342828	E	Cdc42se2
GO:0060606	5,7,6	tube closure	48	0.0033	1	0.005	0.345307	E	Stil
GO:0001843	7,6,9,8,10,12,11,13	neural tube closure	48	0.0033	1	0.005	0.345307	E	Stil
GO:0050909	8	sensory perception of taste	48	0.0033	1	0.005	0.345307	E	P2rx3
GO:0032583	9,8,10,7	regulation of gene-specific transcription	49	0.0033	1	0.005	0.347651	E	Hmgb2
GO:0043406	12,9,11	positive regulation of MAP kinase activity	49	0.0033	1	0.005	0.347651	E	Efna1
GO:0050864	8,7,6	regulation of B cell activation	50	0.0034	1	0.005	0.349866	E	Stat6
GO:0046631	7,6	alpha-beta T cell activation	50	0.0034	1	0.005	0.349866	E	Blm
GO:0008217	4,6	regulation of blood pressure	51	0.0035	1	0.005	0.351953	E	Ptgs1
GO:0015992	5,7,6,8	proton transport	51	0.0035	1	0.005	0.351953	E	Atp6v0e2
GO:0014020	6,5,8,7,9,11,10,12	primary neural tube formation	51	0.0035	1	0.005	0.351953	E	Stil
GO:0046661	4,5,6	male sex differentiation	51	0.0035	1	0.005	0.351953	E	Hmgb2
GO:0042493	4	response to drug	51	0.0035	1	0.005	0.351953	E	Rad54l
GO:0006818	4,5	hydrogen transport	51	0.0035	1	0.005	0.351953	E	Atp6v0e2
GO:0046850	6,5	regulation of bone remodeling	51	0.0035	1	0.005	0.351953	E	Enpp1
GO:0002757	8,7,6,4	immune response-activating signal transduction	51	0.0035	1	0.005	0.351953	E	Tlr4
GO:0032868	6	response to insulin stimulus	52	0.0035	1	0.005	0.353916	E	Stxbp4
GO:0051101	5	regulation of DNA binding	52	0.0035	1	0.005	0.353916	E	Hipk3
GO:0006119	5,7	oxidative phosphorylation	53	0.0036	1	0.005	0.355759	E	Atp6v0e2
GO:0009582	4	detection of abiotic stimulus	53	0.0036	1	0.005	0.355759	E	Pcdh15
GO:0009880	4,5	embryonic pattern specification	53	0.0036	1	0.005	0.355759	E	Stil
GO:0044242	5,6	cellular lipid catabolic process	54	0.0037	1	0.005	0.357483	E	Smpd1
GO:0010639	6,4,5	negative regulation of organelle organization	54	0.0037	1	0.005	0.357483	E	Cenpe
GO:0006979	4	response to oxidative stress	54	0.0037	1	0.005	0.357483	E	Ptgs1
GO:0035148	4,6,5	tube lumen formation	54	0.0037	1	0.005	0.357483	E	Stil
GO:0032870	4,5	cellular response to hormone stimulus	55	0.0038	1	0.005	0.359092	E	Stxbp4
GO:0002764	6,5	immune response-regulating signal transduction	55	0.0038	1	0.005	0.359092	E	Tlr4
GO:0002819	6,5	regulation of adaptive immune response	55	0.0038	1	0.005	0.359092	E	Stat6
GO:0002822	7,6	regulation of adaptive immune response based on somatic recombination of immune receptors built from immunoglobulin superfamily domains	55	0.0038	1	0.005	0.359092	E	Stat6
GO:0001656	6,7	metanephros development	55	0.0038	1	0.005	0.359092	E	Pgf
GO:0042035	7,6,5	regulation of cytokine biosynthetic process	56	0.0038	1	0.005	0.360589	E	Tlr4
GO:0007565	3,4	female pregnancy	56	0.0038	1	0.005	0.360589	E	Vdr
GO:0009581	4	detection of external stimulus	56	0.0038	1	0.005	0.360589	E	Pcdh15
GO:0045454	5,6,4	cell redox homeostasis	57	0.0039	1	0.005	0.361976	E	Pdia5
GO:0048585	5,3,4	negative regulation of response to stimulus	57	0.0039	1	0.005	0.361976	E	Stat6
GO:0016569	7	covalent chromatin modification	57	0.0039	1	0.005	0.361976	E	Hells
GO:0007219	7,6	Notch signaling pathway	57	0.0039	1	0.005	0.361976	E	Hey2
GO:0010740	8,9,7,6	positive regulation of protein kinase cascade	58	0.004	1	0.005	0.363256	E	Tlr4
GO:0043414	6	biopolymer methylation	58	0.004	1	0.005	0.363256	E	Hells
GO:0048568	5,6,4	embryonic organ development	58	0.004	1	0.005	0.363256	E	Stil
GO:0006865	5,6,7	amino acid transport	58	0.004	1	0.005	0.363256	E	Slc7a6
GO:0048704	6,7,8,5	embryonic skeletal system morphogenesis	59	0.004	1	0.005	0.364433	E	Tgfbr1
GO:0001841	5,7,8,10,9,11,6	neural tube formation	59	0.004	1	0.005	0.364433	E	Stil
GO:0006959	4	humoral immune response	59	0.004	1	0.005	0.364433	E	Exo1
GO:0043473	2	pigmentation	61	0.0042	1	0.005	0.366483	E	Adamts9
GO:0009108	6	coenzyme biosynthetic process	61	0.0042	1	0.005	0.366483	E	Dbt
GO:0046849	4	bone remodeling	61	0.0042	1	0.005	0.366483	E	Enpp1
GO:0001838	4,6,7,9,8,10,5	embryonic epithelial tube formation	62	0.0042	1	0.005	0.367362	E	Stil
GO:0043523	8,7	regulation of neuron apoptosis	62	0.0042	1	0.005	0.367362	E	Tgfb3
GO:0065002	7,4,6,5,8	intracellular protein transmembrane transport	62	0.0042	1	0.005	0.367362	E	Sil1
GO:0032880	5,4	regulation of protein localization	63	0.0043	1	0.005	0.368147	E	Cenpe
GO:0009615	4,5	response to virus	63	0.0043	1	0.005	0.368147	E	Eif2ak2
GO:0008344	4,5	adult locomotory behavior	63	0.0043	1	0.005	0.368147	E	Pcdh15
GO:0050906	7,4	detection of stimulus involved in sensory perception	64	0.0044	1	0.005	0.36884	E	Pcdh15
GO:0050870	9,8,7,6	positive regulation of T cell activation	64	0.0044	1	0.005	0.36884	E	Blm
GO:0050905	5	neuromuscular process	64	0.0044	1	0.005	0.36884	E	Pcdh15
GO:0007156	5	homophilic cell adhesion	64	0.0044	1	0.005	0.36884	E	Pcdh15
GO:0035270	5	endocrine system development	65	0.0044	1	0.005	0.369445	E	Tgfbr1
GO:0032259	5	methylation	65	0.0044	1	0.005	0.369445	E	Hells
GO:0042472	7,5,8,9,6,4	inner ear morphogenesis	66	0.0045	1	0.005	0.369962	E	Pcdh15
GO:0008643	4,5	carbohydrate transport	66	0.0045	1	0.005	0.369962	E	Stxbp4
GO:0032318	9,10,7,8	regulation of Ras GTPase activity	66	0.0045	1	0.005	0.369962	E	Arfgap3
GO:0001505	4,6,7	regulation of neurotransmitter levels	67	0.0046	1	0.005	0.370394	E	Ache
GO:0042089	6,4	cytokine biosynthetic process	67	0.0046	1	0.005	0.370394	E	Tlr4
GO:0050804	7,8,6	regulation of synaptic transmission	68	0.0046	1	0.005	0.370744	E	P2rx3
GO:0050673	4	epithelial cell proliferation	68	0.0046	1	0.005	0.370744	E	Alms1
GO:0003007	6,7,5	heart morphogenesis	68	0.0046	1	0.005	0.370744	E	Stil
GO:0016072	8,7	rRNA metabolic process	68	0.0046	1	0.005	0.370744	E	Gar1
GO:0006364	5,9,8,7	rRNA processing	68	0.0046	1	0.005	0.370744	E	Gar1
GO:0042107	5	cytokine metabolic process	68	0.0046	1	0.005	0.370744	E	Tlr4
GO:0034754	6,4	cellular hormone metabolic process	70	0.0048	1	0.005	0.371206	E	Retsat
GO:0051402	6	neuron apoptosis	70	0.0048	1	0.005	0.371206	E	Tgfb3
GO:0051969	6,7,5	regulation of transmission of nerve impulse	71	0.0048	1	0.005	0.371321	E	P2rx3
GO:0007179	9,8	transforming growth factor beta receptor signaling pathway	72	0.0049	1	0.005	0.371363	E	Tgfbr1
GO:0043434	5	response to peptide hormone stimulus	72	0.0049	1	0.005	0.371363	E	Stxbp4
GO:0008150	1	biological_process	14659	1	202	1	1	D	Serpine1,Anxa5,Wbp1,Kif15,Fads3,Bcmo1,Tmed3,Pyroxd2,Zfp667,Hist1h1d,Espl1,Fkbp14,Gfpt1,Tdg,Lass6,Chek1,Bhlhe40,Fen1,Mylip,Ache,Rab31,Ergic2,Mrgprx2,Hcn2,Rhov,Shmt1,Slc39a9,Usp18,Kazald1,Slc31a2,Alms1,Cdc6,Akap6,Ctso,Isca1,Adamts9,Gar1,Hist1h2bc,Neil3,Serinc5,Esco2,Pcdh15,H60a,Nasp,Nek2,Hmgb2,Mcm3,Hipk3,Gins1,Incenp,Wee1,Arfgap3,Gstk1,Ccnf,Cd274,Tmem108,Rad54l,Pold4,P2rx3,Echdc2,Vdr,Smpd1,Mcm5,Gat…
GO:0006754	12	ATP biosynthetic process	73	0.005	1	0.005	0.371333	D	Atp6v0e2
GO:0035023	9,10,8	regulation of Rho protein signal transduction	73	0.005	1	0.005	0.371333	D	Ect2
GO:0006766	4	vitamin metabolic process	74	0.005	1	0.005	0.371232	D	Retsat
GO:0008406	5,6,7	gonad development	74	0.005	1	0.005	0.371232	D	Hmgb2
GO:0031644	6,5	regulation of neurological system process	75	0.0051	1	0.005	0.371063	D	P2rx3
GO:0007218	8,7	neuropeptide signaling pathway	75	0.0051	1	0.005	0.371063	D	Lphn2
GO:0006916	9,8,7,6	anti-apoptosis	75	0.0051	1	0.005	0.371063	D	Hells
GO:0007229	7,6	integrin-mediated signaling pathway	75	0.0051	1	0.005	0.371063	D	Itga2
GO:0042471	6,7,8,5	ear morphogenesis	76	0.0052	1	0.005	0.370829	D	Pcdh15
GO:0048592	6,7,8,5	eye morphogenesis	77	0.0053	1	0.005	0.37053	D	Alms1
GO:0043087	6	regulation of GTPase activity	77	0.0053	1	0.005	0.37053	D	Arfgap3
GO:0051493	6,5	regulation of cytoskeleton organization	78	0.0053	1	0.005	0.370168	D	Cenpe
GO:0051258	7,6	protein polymerization	78	0.0053	1	0.005	0.370168	D	Fbxo5
GO:0048706	6,7	embryonic skeletal system development	78	0.0053	1	0.005	0.370168	D	Tgfbr1
GO:0046034	11	ATP metabolic process	78	0.0053	1	0.005	0.370168	D	Atp6v0e2
GO:0048511	2	rhythmic process	79	0.0054	1	0.005	0.369745	D	Nr1d1
GO:0051129	5,3,4	negative regulation of cellular component organization	79	0.0054	1	0.005	0.369745	D	Cenpe
GO:0016051	4,5	carbohydrate biosynthetic process	80	0.0055	1	0.005	0.369264	D	Gfpt1
GO:0051606	3	detection of stimulus	80	0.0055	1	0.005	0.369264	D	Pcdh15
GO:0009206	11	purine ribonucleoside triphosphate biosynthetic process	82	0.0056	1	0.005	0.368131	D	Atp6v0e2
GO:0009201	10	ribonucleoside triphosphate biosynthetic process	82	0.0056	1	0.005	0.368131	D	Atp6v0e2
GO:0009145	10	purine nucleoside triphosphate biosynthetic process	83	0.0057	1	0.005	0.367482	D	Atp6v0e2
GO:0002526	6	acute inflammatory response	83	0.0057	1	0.005	0.367482	D	Tlr4
GO:0009142	9	nucleoside triphosphate biosynthetic process	84	0.0057	1	0.005	0.366781	D	Atp6v0e2
GO:0032101	5,4	regulation of response to external stimulus	85	0.0058	1	0.005	0.366029	D	Anxa2
GO:0060341	5,4	regulation of cellular localization	85	0.0058	1	0.005	0.366029	D	Cenpe
GO:0048839	4,7,8	inner ear development	86	0.0059	1	0.005	0.365228	D	Pcdh15
GO:0009205	10	purine ribonucleoside triphosphate metabolic process	87	0.0059	1	0.005	0.364378	D	Atp6v0e2
GO:0022612	5,6,7,4	gland morphogenesis	87	0.0059	1	0.005	0.364378	D	Vdr
GO:0009199	9	ribonucleoside triphosphate metabolic process	88	0.006	1	0.005	0.363483	D	Atp6v0e2
GO:0045137	4,5,6	development of primary sexual characteristics	88	0.006	1	0.005	0.363483	D	Hmgb2
GO:0045664	8,7,9,6	regulation of neuron differentiation	89	0.0061	1	0.005	0.362542	D	Efna1
GO:0002253	7,3,5,6	activation of immune response	89	0.0061	1	0.005	0.362542	D	Tlr4
GO:0007015	6,5	actin filament organization	89	0.0061	1	0.005	0.362542	D	Pcdh15
GO:0016331	6,8,7,9,5	morphogenesis of embryonic epithelium	90	0.0061	1	0.005	0.361558	D	Stil
GO:0021915	4,6,7	neural tube development	91	0.0062	1	0.005	0.360532	D	Stil
GO:0015837	4,5	amine transport	91	0.0062	1	0.005	0.360532	D	Slc7a6
GO:0030534	3,4	adult behavior	91	0.0062	1	0.005	0.360532	D	Pcdh15
GO:0006936	5	muscle contraction	91	0.0062	1	0.005	0.360532	D	P2rx3
GO:0009144	9	purine nucleoside triphosphate metabolic process	92	0.0063	1	0.005	0.359465	D	Atp6v0e2
GO:0030326	7,6	embryonic limb morphogenesis	92	0.0063	1	0.005	0.359465	D	Dicer1
GO:0030324	5,6,7	lung development	92	0.0063	1	0.005	0.359465	D	Dicer1
GO:0035113	6,5	embryonic appendage morphogenesis	92	0.0063	1	0.005	0.359465	D	Dicer1
GO:0030323	5,6	respiratory tube development	94	0.0064	1	0.005	0.357213	D	Dicer1
GO:0003012	4	muscle system process	94	0.0064	1	0.005	0.357213	D	P2rx3
GO:0007178	8,7	transmembrane receptor protein serine/threonine kinase signaling pathway	95	0.0065	1	0.005	0.356031	D	Tgfbr1
GO:0032504	3	multicellular organism reproduction	95	0.0065	1	0.005	0.356031	D	Vdr
GO:0048609	4,3	reproductive process in a multicellular organism	95	0.0065	1	0.005	0.356031	D	Vdr
GO:0009152	10	purine ribonucleotide biosynthetic process	96	0.0065	1	0.005	0.354813	D	Atp6v0e2
GO:0009141	8	nucleoside triphosphate metabolic process	96	0.0065	1	0.005	0.354813	D	Atp6v0e2
GO:0042445	5,3	hormone metabolic process	97	0.0066	1	0.005	0.353561	D	Retsat
GO:0006164	9	purine nucleotide biosynthetic process	99	0.0068	1	0.005	0.350958	D	Atp6v0e2
GO:0009260	9	ribonucleotide biosynthetic process	100	0.0068	1	0.005	0.349609	D	Atp6v0e2
GO:0030217	7,9,10,8,6	T cell differentiation	100	0.0068	1	0.005	0.349609	D	Blm
GO:0042254	4	ribosome biogenesis	101	0.0069	1	0.005	0.34823	D	Gar1
GO:0006725	4	cellular aromatic compound metabolic process	103	0.007	1	0.005	0.345387	D	Ddc
GO:0060541	5	respiratory system development	103	0.007	1	0.005	0.345387	D	Dicer1
GO:0043583	6,7	ear development	103	0.007	1	0.005	0.345387	D	Pcdh15
GO:0009150	9	purine ribonucleotide metabolic process	105	0.0072	1	0.005	0.342436	D	Atp6v0e2
GO:0019932	7,6	second-messenger-mediated signaling	106	0.0072	1	0.005	0.340923	D	Alms1
GO:0007548	4,5	sex differentiation	110	0.0075	1	0.005	0.334642	D	Hmgb2
GO:0042742	5,6	defense response to bacterium	111	0.0076	1	0.005	0.333019	D	Tlr4
GO:0009259	8	ribonucleotide metabolic process	111	0.0076	1	0.005	0.333019	D	Atp6v0e2
GO:0022900	5,4	electron transport chain	112	0.0076	1	0.005	0.331377	D	Fads3
GO:0033043	5,4	regulation of organelle organization	112	0.0076	1	0.005	0.331377	D	Cenpe
GO:0035108	6,5	limb morphogenesis	113	0.0077	1	0.005	0.329716	D	Dicer1
GO:0035107	5,4	appendage morphogenesis	113	0.0077	1	0.005	0.329716	D	Dicer1
GO:0006163	8	purine nucleotide metabolic process	113	0.0077	1	0.005	0.329716	D	Atp6v0e2
GO:0048608	4,5	reproductive structure development	114	0.0078	1	0.005	0.328037	D	Hmgb2
GO:0050767	7,6,8,5	regulation of neurogenesis	114	0.0078	1	0.005	0.328037	D	Efna1
GO:0009314	4	response to radiation	116	0.0079	1	0.005	0.32463	D	Rad54l
GO:0060173	5	limb development	117	0.008	1	0.005	0.322903	D	Dicer1
GO:0022613	3	ribonucleoprotein complex biogenesis	117	0.008	1	0.005	0.322903	D	Gar1
GO:0048736	4	appendage development	117	0.008	1	0.005	0.322903	D	Dicer1
GO:0008015	5	blood circulation	119	0.0081	1	0.005	0.319406	D	Ptgs1
GO:0003013	4	circulatory system process	119	0.0081	1	0.005	0.319406	D	Ptgs1
GO:0048705	6,7,5	skeletal system morphogenesis	123	0.0084	1	0.005	0.312261	D	Tgfbr1
GO:0009967	7,6,5	positive regulation of signal transduction	124	0.0085	1	0.005	0.310446	D	Tlr4
GO:0010608	7,6	posttranscriptional regulation of gene expression	124	0.0085	1	0.005	0.310446	D	Dicer1
GO:0043010	7,8	camera-type eye development	126	0.0086	1	0.005	0.306789	D	Ache
GO:0051960	5,6,4	regulation of nervous system development	128	0.0087	1	0.005	0.303097	D	Efna1
GO:0043623	6,5	cellular protein complex assembly	129	0.0088	1	0.005	0.30124	D	Fbxo5
GO:0019318	6,7	hexose metabolic process	129	0.0088	1	0.005	0.30124	D	Galt
GO:0006605	7,6,8	protein targeting	129	0.0088	1	0.005	0.30124	D	Stxbp4
GO:0034470	8,7,6	ncRNA processing	133	0.0091	1	0.005	0.293747	D	Gar1
GO:0005996	5,6	monosaccharide metabolic process	133	0.0091	1	0.005	0.293747	D	Galt
GO:0010647	6,4,5	positive regulation of cell communication	137	0.0093	1	0.005	0.286176	D	Tlr4
GO:0009968	7,6,5	negative regulation of signal transduction	138	0.0094	1	0.005	0.284275	D	Hey2
GO:0046578	8,9,7	regulation of Ras protein signal transduction	151	0.0103	2	0.0099	0.273393	D	Arfgap3,Ect2
GO:0045165	5,4	cell fate commitment	144	0.0098	1	0.005	0.272832	D	Tgfbr1
GO:0018193	8,7	peptidyl-amino acid modification	155	0.0106	2	0.0099	0.272555	D	Hipk3,Pbk
GO:0001654	6,7	eye development	157	0.0107	2	0.0099	0.271998	D	Ache,Alms1
GO:0048584	5,3,4	positive regulation of response to stimulus	159	0.0108	2	0.0099	0.271352	D	H60a,Tlr4
GO:0015674	6,7	di-, tri-valent inorganic cation transport	159	0.0108	2	0.0099	0.271352	D	Vdr,Trpc7
GO:0045596	6,5,4	negative regulation of cell differentiation	162	0.0111	2	0.0099	0.270223	D	Enpp1,Dicer1
GO:0009952	6,5	anterior/posterior pattern formation	147	0.01	1	0.005	0.267104	D	Tgfbr1
GO:0010648	6,4,5	negative regulation of cell communication	147	0.01	1	0.005	0.267104	D	Hey2
GO:0008285	6,4,5	negative regulation of cell proliferation	173	0.0118	2	0.0099	0.264586	D	Cd274,Tgfb3
GO:0045597	6,5,4	positive regulation of cell differentiation	150	0.0102	1	0.005	0.261385	D	Adamts9
GO:0042110	6,5	T cell activation	178	0.0121	2	0.0099	0.261332	D	Cd274,Blm
GO:0002521	5,7,8,6	leukocyte differentiation	179	0.0122	2	0.0099	0.260635	D	Blm,Hells
GO:0051056	7,8,6	regulation of small GTPase mediated signal transduction	183	0.0125	2	0.0099	0.257702	D	Arfgap3,Ect2
GO:0010817	4	regulation of hormone levels	152	0.0104	1	0.005	0.257582	D	Retsat
GO:0051336	5	regulation of hydrolase activity	152	0.0104	1	0.005	0.257582	D	Arfgap3
GO:0006897	5,4,6	endocytosis	184	0.0126	2	0.0099	0.256934	D	Ache,Cdc42se2
GO:0007169	8,7	transmembrane receptor protein tyrosine kinase signaling pathway	184	0.0126	2	0.0099	0.256934	D	Stxbp4,Efna1
GO:0010324	4	membrane invagination	184	0.0126	2	0.0099	0.256934	D	Ache,Cdc42se2
GO:0003006	3,4	reproductive developmental process	153	0.0104	1	0.005	0.255685	D	Hmgb2
GO:0044057	5,4	regulation of system process	154	0.0105	1	0.005	0.25379	D	P2rx3
GO:0009617	4,5	response to bacterium	154	0.0105	1	0.005	0.25379	D	Tlr4
GO:0016337	4	cell-cell adhesion	154	0.0105	1	0.005	0.25379	D	Pcdh15
GO:0043085	5	positive regulation of catalytic activity	194	0.0132	2	0.0099	0.248581	D	Efna1,Cenpe
GO:0030900	4,6,7,8	forebrain development	158	0.0108	1	0.005	0.246245	D	Stil
GO:0009165	8	nucleotide biosynthetic process	207	0.0141	2	0.0099	0.236215	D	Atp6v0e2,Rrm2
GO:0016568	6	chromatin modification	215	0.0147	2	0.0099	0.227978	D	Nasp,Hells
GO:0044093	4	positive regulation of molecular function	226	0.0154	3	0.0149	0.22674	D	Hipk3,Efna1,Cenpe
GO:0008284	6,4,5	positive regulation of cell proliferation	231	0.0158	3	0.0149	0.22595	D	Pold4,Blm,Hey2
GO:0051707	3,4	response to other organism	220	0.015	2	0.0099	0.222652	D	Tlr4,Eif2ak2
GO:0007423	5,6	sensory organ development	255	0.0174	3	0.0149	0.217998	D	Ache,Alms1,Pcdh15
GO:0030036	5,4	actin cytoskeleton organization	174	0.0119	1	0.005	0.216879	D	Pcdh15
GO:0016044	3	membrane organization	261	0.0178	3	0.0149	0.215087	D	Ache,Cdc42se2,Zmpste24
GO:0045892	9,8,10,7,6	negative regulation of transcription, DNA-dependent	264	0.018	3	0.0149	0.213514	D	Bhlhe40,Hipk3,Hells
GO:0034660	7,6	ncRNA metabolic process	176	0.012	1	0.005	0.213326	D	Gar1
GO:0051253	8,7,6,5	negative regulation of RNA metabolic process	266	0.0181	3	0.0149	0.212425	D	Bhlhe40,Hipk3,Hells
GO:0006954	5	inflammatory response	233	0.0159	2	0.0099	0.208363	D	Scn9a,Tlr4
GO:0007389	4,3	pattern specification process	280	0.0191	3	0.0149	0.203982	D	Stil,Rfng,Tgfbr1
GO:0007167	7,6	enzyme linked receptor protein signaling pathway	283	0.0193	3	0.0149	0.202008	D	Stxbp4,Efna1,Tgfbr1
GO:0048729	6,5,7,4	tissue morphogenesis	311	0.0212	4	0.0198	0.196621	D	Pcdh15,Vdr,Stil,Pgf
GO:0032268	6,7,5	regulation of cellular protein metabolic process	291	0.0199	3	0.0149	0.196505	D	Ache,Hipk3,Cbs
GO:0016481	8,9,6,7	negative regulation of transcription	312	0.0213	4	0.0198	0.196426	D	Bhlhe40,Hipk3,Vdr,Hells
GO:0030029	3	actin filament-based process	187	0.0128	1	0.005	0.19435	D	Pcdh15
GO:0007409	6,8,7,11,9,12,10	axonogenesis	187	0.0128	1	0.005	0.19435	D	Efna1
GO:0048666	8,5,9,6	neuron development	303	0.0207	3	0.0149	0.18771	D	Alms1,Pcdh15,Efna1
GO:0009611	4	response to wounding	341	0.0233	4	0.0198	0.187549	D	Anxa5,Scn9a,Anxa2,Tlr4
GO:0006886	6,5,7	intracellular protein transport	305	0.0208	3	0.0149	0.186192	D	Stxbp4,Sil1,Sec23a
GO:0010558	7,5,6	negative regulation of macromolecule biosynthetic process	345	0.0235	4	0.0198	0.185896	D	Bhlhe40,Hipk3,Vdr,Hells
GO:0044262	4,5	cellular carbohydrate metabolic process	308	0.021	3	0.0149	0.183893	D	Galt,Fut11,Ganab
GO:0007267	4	cell-cell signaling	353	0.0241	4	0.0198	0.18233	D	Ache,Serinc5,P2rx3,Gria2
GO:0031327	7,5,6	negative regulation of cellular biosynthetic process	354	0.0241	4	0.0198	0.181861	D	Bhlhe40,Hipk3,Vdr,Hells
GO:0009890	6,4,5	negative regulation of biosynthetic process	357	0.0244	4	0.0198	0.180427	D	Bhlhe40,Hipk3,Vdr,Hells
GO:0048598	5,4	embryonic morphogenesis	358	0.0244	4	0.0198	0.17994	D	Pcdh15,Stil,Tgfbr1,Dicer1
GO:0048534	5,6,4	hemopoietic or lymphoid organ development	315	0.0215	3	0.0149	0.178435	D	Blm,Hells,Tgfbr1
GO:0032989	3,4,5	cellular component morphogenesis	377	0.0257	5	0.0248	0.178181	D	Pcdh15,Efna1,Ect2,Cdc42ep5,Cdc42se2
GO:0006091	4	generation of precursor metabolites and energy	261	0.0178	2	0.0099	0.176874	D	Fads3,Atp6v0e2
GO:0048812	5,7,6,10,8,11,9	neuron projection morphogenesis	198	0.0135	1	0.005	0.176429	D	Efna1
GO:0006753	6	nucleoside phosphate metabolic process	264	0.018	2	0.0099	0.173533	D	Atp6v0e2,Rrm2
GO:0009117	7	nucleotide metabolic process	264	0.018	2	0.0099	0.173533	D	Atp6v0e2,Rrm2
GO:0051704	2	multi-organism process	323	0.022	3	0.0149	0.172071	D	Vdr,Tlr4,Eif2ak2
GO:0048667	6,9,7,10,8	cell morphogenesis involved in neuron differentiation	201	0.0137	1	0.005	0.171736	D	Efna1
GO:0034613	5	cellular protein localization	324	0.0221	3	0.0149	0.171269	D	Stxbp4,Sil1,Sec23a
GO:0045944	10,9,11,8,7	positive regulation of transcription from RNA polymerase II promoter	324	0.0221	3	0.0149	0.171269	D	Hmgb2,Tgfb3,Stat6
GO:0070727	4	cellular macromolecule localization	326	0.0222	3	0.0149	0.169659	D	Stxbp4,Sil1,Sec23a
GO:0048858	4,5,6,7	cell projection morphogenesis	205	0.014	1	0.005	0.165614	D	Efna1
GO:0010605	6,4,5	negative regulation of macromolecule metabolic process	457	0.0312	6	0.0297	0.162923	D	Bhlhe40,Hipk3,Vdr,Blm,Hells,Dicer1
GO:0000122	10,9,11,8,7	negative regulation of transcription from RNA polymerase II promoter	208	0.0142	1	0.005	0.161124	D	Hipk3
GO:0042981	7,6	regulation of apoptosis	475	0.0324	6	0.0297	0.160136	D	H60a,Vdr,Hells,Tgfb3,Stil,Tgfbr1
GO:0031324	6,4,5	negative regulation of cellular metabolic process	443	0.0302	5	0.0248	0.159905	D	Bhlhe40,Hipk3,Vdr,Blm,Hells
GO:0009892	5,3,4	negative regulation of metabolic process	478	0.0326	6	0.0297	0.159533	D	Bhlhe40,Hipk3,Vdr,Blm,Hells,Dicer1
GO:0043067	6,5	regulation of programmed cell death	482	0.0329	6	0.0297	0.158671	D	H60a,Vdr,Hells,Tgfb3,Stil,Tgfbr1
GO:0055086	5	nucleobase, nucleoside and nucleotide metabolic process	278	0.019	2	0.0099	0.158213	D	Atp6v0e2,Rrm2
GO:0010941	5,4	regulation of cell death	485	0.0331	6	0.0297	0.157983	D	H60a,Vdr,Hells,Tgfb3,Stil,Tgfbr1
GO:0003002	5,4	regionalization	212	0.0145	1	0.005	0.155274	D	Tgfbr1
GO:0032990	4,5,6	cell part morphogenesis	213	0.0145	1	0.005	0.153836	D	Efna1
GO:0051246	6,5	regulation of protein metabolic process	349	0.0238	3	0.0149	0.150974	D	Ache,Hipk3,Cbs
GO:0031328	7,5,6	positive regulation of cellular biosynthetic process	466	0.0318	5	0.0248	0.149542	D	H60a,Hmgb2,Tgfb3,Stat6,Tlr4
GO:0009891	6,4,5	positive regulation of biosynthetic process	468	0.0319	5	0.0248	0.148581	D	H60a,Hmgb2,Tgfb3,Stat6,Tlr4
GO:0030182	7,8,5	neuron differentiation	414	0.0282	4	0.0198	0.147521	D	Alms1,Pcdh15,Efna1,Tgfbr1
GO:0030097	6,7,5	hemopoiesis	289	0.0197	2	0.0099	0.146582	D	Blm,Hells
GO:0006955	3	immune response	474	0.0323	5	0.0248	0.14565	D	H60a,Enpp1,Exo1,Stat6,Tlr4
GO:0010646	5,4	regulation of cell communication	585	0.0399	8	0.0396	0.143382	D	Ache,Hipk3,Arfgap3,P2rx3,Hey2,Ect2,Tlr4,Cbs
GO:0044265	5	cellular macromolecule catabolic process	608	0.0415	8	0.0396	0.142074	D	Mylip,Usp18,Usp51,Usp1,Dtl,Zmpste24,Uhrf1,Fbxo5
GO:0045893	9,8,10,7,6	positive regulation of transcription, DNA-dependent	361	0.0246	3	0.0149	0.141274	D	Hmgb2,Tgfb3,Stat6
GO:0051254	8,7,6,5	positive regulation of RNA metabolic process	362	0.0247	3	0.0149	0.140472	D	Hmgb2,Tgfb3,Stat6
GO:0006357	9,8,10,7	regulation of transcription from RNA polymerase II promoter	552	0.0377	6	0.0297	0.135304	D	Hmgb2,Hipk3,Hey2,Tgfb3,Brip1,Stat6
GO:0031175	4,9,6,10,7	neuron projection development	230	0.0157	1	0.005	0.130888	D	Efna1
GO:0000904	5,6,7	cell morphogenesis involved in differentiation	231	0.0158	1	0.005	0.129626	D	Efna1
GO:0009790	3,4	embryonic development	676	0.0461	8	0.0396	0.129215	D	Pcdh15,Nasp,Gins1,Tgfb3,Stil,Etnk2,Tgfbr1,Dicer1
GO:0010557	7,5,6	positive regulation of macromolecule biosynthetic process	448	0.0306	4	0.0198	0.125754	D	Hmgb2,Tgfb3,Stat6,Tlr4
GO:0055114	3	oxidation reduction	635	0.0433	7	0.0347	0.125047	D	Fads3,Bcmo1,Pyroxd2,Kcnab1,Retsat,Rrm2,Ptgs1
GO:0007610	3	behavior	384	0.0262	3	0.0149	0.123209	D	Pcdh15,P2rx3,Scn9a
GO:0044248	4	cellular catabolic process	828	0.0565	11	0.0545	0.122606	D	Mylip,Ache,Usp18,Smpd1,Usp51,Usp1,Sat1,Dtl,Zmpste24,Uhrf1,Fbxo5
GO:0007626	4	locomotory behavior	237	0.0162	1	0.005	0.122255	D	Pcdh15
GO:0006366	9,7,8	transcription from RNA polymerase II promoter	586	0.04	6	0.0297	0.120479	D	Hmgb2,Hipk3,Hey2,Tgfb3,Brip1,Stat6
GO:0048699	6,7	generation of neurons	458	0.0312	4	0.0198	0.119411	D	Alms1,Pcdh15,Efna1,Tgfbr1
GO:0007242	6,5	intracellular signaling cascade	967	0.066	13	0.0644	0.113932	D	Chek1,Rab31,Rhov,Alms1,Hipk3,Arfgap3,Efna1,Ect2,Cdc42ep5,Tlr4,Eif2ak2,Cbs,Rnd1
GO:0043285	5	biopolymer catabolic process	982	0.067	13	0.0644	0.113109	D	Espl1,Mylip,Usp18,Ctso,Adamts9,Usp51,Usp1,Nsf,Aebp1,Dtl,Zmpste24,Uhrf1,Fbxo5
GO:0031325	6,4,5	positive regulation of cellular metabolic process	537	0.0366	5	0.0248	0.112689	D	H60a,Hmgb2,Tgfb3,Stat6,Tlr4
GO:0002376	2	immune system process	794	0.0542	9	0.0446	0.111464	D	H60a,Cd274,Blm,Hells,Tgfbr1,Enpp1,Exo1,Stat6,Tlr4
GO:0045941	8,9,6,7	positive regulation of transcription	404	0.0276	3	0.0149	0.108378	D	Hmgb2,Tgfb3,Stat6
GO:0009057	4	macromolecule catabolic process	1039	0.0709	13	0.0644	0.106851	D	Espl1,Mylip,Usp18,Ctso,Adamts9,Usp51,Usp1,Nsf,Aebp1,Dtl,Zmpste24,Uhrf1,Fbxo5
GO:0007420	5,6,7	brain development	253	0.0173	1	0.005	0.104246	D	Stil
GO:0010628	7,5,6	positive regulation of gene expression	413	0.0282	3	0.0149	0.102036	D	Hmgb2,Tgfb3,Stat6
GO:0009653	4,3	anatomical structure morphogenesis	1186	0.0809	15	0.0743	0.100661	D	Serpine1,Alms1,Pcdh15,Vdr,Efna1,Hey2,Tgfb3,Ect2,Stil,Cdc42ep5,Pgf,Cdc42se2,Tgfbr1,Anxa2,Dicer1
GO:0009893	5,3,4	positive regulation of metabolic process	560	0.0382	5	0.0248	0.100659	D	H60a,Hmgb2,Tgfb3,Stat6,Tlr4
GO:0022008	5,6	neurogenesis	489	0.0334	4	0.0198	0.100449	D	Alms1,Pcdh15,Efna1,Tgfbr1
GO:0048468	4,5	cell development	765	0.0522	8	0.0396	0.100324	D	Alms1,Pcdh15,Vdr,Efna1,Trip13,Tgfbr1,Dicer1,Fbxo5
GO:0009605	3	response to external stimulus	565	0.0385	5	0.0248	0.0980985	D	Anxa5,Pcdh15,Scn9a,Anxa2,Tlr4
GO:0009056	3	catabolic process	1352	0.0922	18	0.0891	0.0975451	D	Espl1,Mylip,Ache,Usp18,Ctso,Adamts9,Smpd1,Usp51,Usp1,Nsf,Aebp1,Sat1,Pter,Dtl,Zmpste24,Uhrf1,Pld4,Fbxo5
GO:0046907	5,4	intracellular transport	423	0.0289	3	0.0149	0.0952546	D	Stxbp4,Sil1,Sec23a
GO:0045935	7,5,6	positive regulation of nucleobase, nucleoside, nucleotide and nucleic acid metabolic process	424	0.0289	3	0.0149	0.0945924	D	Hmgb2,Tgfb3,Stat6
GO:0007155	3	cell adhesion	582	0.0397	5	0.0248	0.0895936	D	Pcdh15,Aebp1,Tro,Tgfbi,Itga2
GO:0022610	2	biological adhesion	582	0.0397	5	0.0248	0.0895936	D	Pcdh15,Aebp1,Tro,Tgfbi,Itga2
GO:0048522	5,3,4	positive regulation of cellular process	1069	0.0729	12	0.0594	0.0883895	D	Adamts9,H60a,Hmgb2,Pold4,Vdr,Blm,Hey2,Tgfb3,Cenpe,Tgfbr1,Stat6,Tlr4
GO:0016477	5,6,4	cell migration	271	0.0185	1	0.005	0.0866972	D	Tgfbr1
GO:0045449	7,8,6	regulation of transcription	1847	0.126	25	0.1238	0.0851324	D	Zfp667,Lass6,Bhlhe40,Hmgb2,Mcm3,Hipk3,Vdr,Mcm5,Zcchc12,Hells,Cdca7,Hey2,Mlf1ip,Tgfb3,Chaf1a,Atad2,Brip1,Aebp1,Creb3l2,E2f2,Mcm6,Stat6,Uhrf1,Nr1d1,Mcm4
GO:0048869	3	cellular developmental process	1611	0.1099	20	0.099	0.082876	D	Kazald1,Alms1,Adamts9,Pcdh15,Vdr,Blm,Efna1,Hells,Hey2,Igfbp5,Trip13,Ect2,Cdc42ep5,Rfng,Pgf,Cdc42se2,Tgfbr1,Enpp1,Dicer1,Fbxo5
GO:0019219	6,5	regulation of nucleobase, nucleoside, nucleotide and nucleic acid metabolic process	1948	0.1329	26	0.1287	0.0828075	D	Zfp667,Lass6,Bhlhe40,Hmgb2,Mcm3,Hipk3,Vdr,Mcm5,Blm,Zcchc12,Hells,Cdca7,Hey2,Mlf1ip,Tgfb3,Chaf1a,Atad2,Brip1,Aebp1,Creb3l2,E2f2,Mcm6,Stat6,Uhrf1,Nr1d1,Mcm4
GO:0010468	6,5	regulation of gene expression	2019	0.1377	27	0.1337	0.0816031	D	Zfp667,Lass6,Bhlhe40,Hmgb2,Mcm3,Hipk3,Vdr,Mcm5,Zcchc12,Hells,Cdca7,Hey2,Mlf1ip,Tgfb3,Chaf1a,Atad2,Brip1,Aebp1,Creb3l2,E2f2,Mcm6,Tgfbr1,Stat6,Uhrf1,Nr1d1,Mcm4,Dicer1
GO:0010556	6,5	regulation of macromolecule biosynthetic process	1979	0.135	26	0.1287	0.0811993	D	Zfp667,Lass6,Bhlhe40,Hmgb2,Mcm3,Hipk3,Vdr,Mcm5,Zcchc12,Hells,Cdca7,Hey2,Mlf1ip,Tgfb3,Chaf1a,Atad2,Brip1,Aebp1,Creb3l2,E2f2,Mcm6,Stat6,Uhrf1,Nr1d1,Mcm4,Tlr4
GO:0006952	4	defense response	446	0.0304	3	0.0149	0.0807802	D	H60a,Scn9a,Tlr4
GO:0044267	6,5	cellular protein metabolic process	2121	0.1447	29	0.1436	0.0802829	D	Fkbp14,Chek1,Mylip,Ache,Usp18,Nek2,Hipk3,Wee1,Usp51,Bub1b,Efna1,Map3k2,Fkbp7,Usp1,Ptprr,Pbk,Pcmtd1,Melk,Plk3,Styx,Fut11,Tgfbr1,Dtl,Ganab,Zmpste24,Uhrf1,Eif2ak2,Cbs,Fbxo5
GO:0031326	6,5	regulation of cellular biosynthetic process	2058	0.1404	27	0.1337	0.0796158	D	Zfp667,Lass6,Bhlhe40,H60a,Hmgb2,Mcm3,Hipk3,Vdr,Mcm5,Zcchc12,Hells,Cdca7,Hey2,Mlf1ip,Tgfb3,Chaf1a,Atad2,Brip1,Aebp1,Creb3l2,E2f2,Mcm6,Stat6,Uhrf1,Nr1d1,Mcm4,Tlr4
GO:0009889	5,4	regulation of biosynthetic process	2062	0.1407	27	0.1337	0.0793625	D	Zfp667,Lass6,Bhlhe40,H60a,Hmgb2,Mcm3,Hipk3,Vdr,Mcm5,Zcchc12,Hells,Cdca7,Hey2,Mlf1ip,Tgfb3,Chaf1a,Atad2,Brip1,Aebp1,Creb3l2,E2f2,Mcm6,Stat6,Uhrf1,Nr1d1,Mcm4,Tlr4
GO:0010604	6,4,5	positive regulation of macromolecule metabolic process	529	0.0361	4	0.0198	0.0783697	D	Hmgb2,Tgfb3,Stat6,Tlr4
GO:0060255	5,4	regulation of macromolecule metabolic process	2289	0.1561	31	0.1535	0.0777559	D	Zfp667,Lass6,Bhlhe40,Ache,Hmgb2,Mcm3,Hipk3,Vdr,Mcm5,Blm,Zcchc12,Hells,Cdca7,Hey2,Mlf1ip,Tgfb3,Chaf1a,Atad2,Brip1,Aebp1,Creb3l2,E2f2,Mcm6,Tgfbr1,Stat6,Uhrf1,Nr1d1,Mcm4,Dicer1,Tlr4,Cbs
GO:0031323	5,4	regulation of cellular metabolic process	2363	0.1612	32	0.1584	0.0767422	D	Zfp667,Lass6,Bhlhe40,Ache,H60a,Hmgb2,Mcm3,Hipk3,Vdr,Mcm5,Blm,Efna1,Zcchc12,Hells,Cdca7,Hey2,Mlf1ip,Tgfb3,Chaf1a,Atad2,Brip1,Aebp1,Creb3l2,Cenpe,E2f2,Mcm6,Stat6,Uhrf1,Nr1d1,Mcm4,Tlr4,Cbs
GO:0048731	4	system development	1989	0.1357	25	0.1238	0.0752771	D	Serpine1,Ache,Kazald1,Alms1,Serinc5,Pcdh15,Hmgb2,Ccnf,Vdr,Blm,Efna1,Hells,Hey2,Igfbp5,Tgfb3,Stil,Rfng,Pgf,Etnk2,Tgfbr1,Enpp1,Exo1,Anxa2,Stat6,Dicer1
GO:0019222	4,3	regulation of metabolic process	2493	0.1701	34	0.1683	0.0751817	D	Zfp667,Lass6,Bhlhe40,Ache,H60a,Hmgb2,Mcm3,Hipk3,Vdr,Mcm5,Blm,Efna1,Zcchc12,Hells,Cdca7,Hey2,Mlf1ip,Tgfb3,Chaf1a,Atad2,Brip1,Aebp1,Creb3l2,Cenpe,E2f2,Mcm6,Tgfbr1,Stat6,Uhrf1,Nr1d1,Mcm4,Dicer1,Tlr4,Cbs
GO:0007275	3	multicellular organismal development	2476	0.1689	33	0.1634	0.074538	D	Serpine1,Ache,Kazald1,Alms1,Serinc5,Pcdh15,Nasp,Hmgb2,Gins1,Ccnf,Vdr,Scn9a,Blm,Efna1,Hells,Fancd2,Hey2,Igfbp5,Tgfb3,Stil,Rfng,Cenpe,Pgf,Etnk2,Tgfbr1,Enpp1,Exo1,Anxa2,Stat6,Uhrf1,Dicer1,Trim71,Olfml3
GO:0019538	5,4	protein metabolic process	2592	0.1768	34	0.1683	0.071551	D	Espl1,Fkbp14,Chek1,Mylip,Ache,Usp18,Ctso,Adamts9,Nek2,Hipk3,Wee1,Usp51,Bub1b,Efna1,Map3k2,Fkbp7,Usp1,Ptprr,Pbk,Pcmtd1,Nsf,Aebp1,Melk,Plk3,Styx,Fut11,Tgfbr1,Dtl,Ganab,Zmpste24,Uhrf1,Eif2ak2,Cbs,Fbxo5
GO:0032502	2	developmental process	2915	0.1989	40	0.198	0.0707389	D	Serpine1,Ache,Kazald1,Alms1,Adamts9,Serinc5,Pcdh15,H60a,Nasp,Hmgb2,Gins1,Ccnf,Vdr,Scn9a,Blm,Efna1,Hells,Fancd2,Hey2,Igfbp5,Tgfb3,Trip13,Ect2,Stil,Cdc42ep5,Rfng,Cenpe,Pgf,Etnk2,Cdc42se2,Tgfbr1,Enpp1,Exo1,Anxa2,Stat6,Uhrf1,Dicer1,Trim71,Olfml3,Fbxo5
GO:0006350	7,5	transcription	2108	0.1438	26	0.1287	0.069171	D	Zfp667,Lass6,Bhlhe40,Hmgb2,Mcm3,Hipk3,Vdr,Mcm5,Zcchc12,Hells,Cdca7,Hey2,Zfp317,Mlf1ip,Tgfb3,Chaf1a,Atad2,Brip1,Aebp1,Creb3l2,E2f2,Mcm6,Stat6,Uhrf1,Nr1d1,Mcm4
GO:0006396	7,6,5	RNA processing	389	0.0265	2	0.0099	0.0651264	D	Gar1,Dicer1
GO:0080090	5,4	regulation of primary metabolic process	2278	0.1554	28	0.1386	0.064975	D	Zfp667,Lass6,Bhlhe40,Ache,Hmgb2,Mcm3,Hipk3,Vdr,Mcm5,Blm,Zcchc12,Hells,Cdca7,Hey2,Mlf1ip,Tgfb3,Chaf1a,Atad2,Brip1,Aebp1,Creb3l2,E2f2,Mcm6,Stat6,Uhrf1,Nr1d1,Mcm4,Cbs
GO:0016070	6,5	RNA metabolic process	2221	0.1515	27	0.1337	0.0636495	D	Zfp667,Lass6,Bhlhe40,Gar1,Hmgb2,Mcm3,Hipk3,Vdr,Mcm5,Zcchc12,Hells,Cdca7,Hey2,Mlf1ip,Tgfb3,Chaf1a,Atad2,Brip1,Aebp1,Creb3l2,E2f2,Mcm6,Stat6,Uhrf1,Nr1d1,Mcm4,Dicer1
GO:0007399	5	nervous system development	797	0.0544	7	0.0347	0.063084	D	Alms1,Serinc5,Pcdh15,Efna1,Stil,Rfng,Tgfbr1
GO:0030154	4	cell differentiation	1535	0.1047	17	0.0842	0.0619368	D	Kazald1,Alms1,Adamts9,Pcdh15,Vdr,Blm,Efna1,Hells,Hey2,Igfbp5,Trip13,Rfng,Pgf,Tgfbr1,Enpp1,Dicer1,Fbxo5
GO:0032879	4,3	regulation of localization	307	0.0209	1	0.005	0.0591492	D	Cenpe
GO:0048870	4,5,3	cell motility	313	0.0214	1	0.005	0.0554111	D	Tgfbr1
GO:0051641	3	cellular localization	666	0.0454	5	0.0248	0.0537418	D	Stxbp4,Kdelr3,Cenpe,Sil1,Sec23a
GO:0048518	4,2,3	positive regulation of biological process	1212	0.0827	12	0.0594	0.0530708	D	Adamts9,H60a,Hmgb2,Pold4,Vdr,Blm,Hey2,Tgfb3,Cenpe,Tgfbr1,Stat6,Tlr4
GO:0007417	5,6	central nervous system development	327	0.0223	1	0.005	0.0475085	D	Stil
GO:0048513	4,5	organ development	1641	0.1119	17	0.0842	0.0427823	D	Serpine1,Ache,Alms1,Pcdh15,Hmgb2,Ccnf,Vdr,Blm,Hells,Hey2,Tgfb3,Stil,Pgf,Etnk2,Tgfbr1,Anxa2,Dicer1
GO:0009888	5,6,4	tissue development	637	0.0435	4	0.0198	0.0357508	D	Pcdh15,Vdr,Stil,Pgf
GO:0006412	7,5,6	translation	362	0.0247	1	0.005	0.0320618	D	Eif2ak2
GO:0040011	2	locomotion	400	0.0273	1	0.005	0.0206715	D	Tgfbr1
GO:0051674	3	localization of cell	403	0.0275	1	0.005	0.0199581	D	Tgfbr1
GO:0006928	3,4	cell motion	403	0.0275	1	0.005	0.0199581	D	Tgfbr1
GO:0051649	4,3	establishment of localization in cell	626	0.0427	3	0.0149	0.0174004	D	Stxbp4,Sil1,Sec23a
GO:0010467	4	gene expression	2959	0.2019	30	0.1485	0.011306	D	Zfp667,Lass6,Bhlhe40,Gar1,Hmgb2,Mcm3,Hipk3,Vdr,Mcm5,Zcchc12,Hells,Cdca7,Hey2,Zfp317,Mlf1ip,Tgfb3,Chaf1a,Atad2,Brip1,Aebp1,Creb3l2,E2f2,Mcm6,Tgfbr1,Stat6,Uhrf1,Nr1d1,Mcm4,Dicer1,Eif2ak2
GO:0065007	2	biological regulation	6588	0.4494	73	0.3614	0.0022472	D	Serpine1,Anxa5,Zfp667,Lass6,Chek1,Bhlhe40,Ache,Rab31,Mrgprx2,Hcn2,Rhov,Kazald1,Alms1,Adamts9,Serinc5,H60a,Hmgb2,Mcm3,Hipk3,Arfgap3,Cd274,Pold4,P2rx3,Vdr,Mcm5,Blm,Mrgpre,Stxbp4,Efna1,Zcchc12,Slc30a4,Hells,Cdca7,Hey2,Mlf1ip,Lphn2,Gpr12,Igfbp5,Tgfb3,Chaf1a,Atad2,Brip1,Olfr803,Retsat,Aebp1,Ect2,Kdelr3,Creb3l2,Stil,Cdc42ep5,Sat1,Pdia5,Cenpe,Pgf,Tro,E2f2,Mcm6,Cdc42se2,Tgfbr1,Enpp1,Anxa2,Itga2,Stat6,Uhr…
GO:0050794	4,3	regulation of cellular process	6001	0.4094	65	0.3218	0.0021382	D	Serpine1,Zfp667,Lass6,Chek1,Bhlhe40,Ache,Rab31,Mrgprx2,Rhov,Kazald1,Alms1,Adamts9,H60a,Hmgb2,Mcm3,Hipk3,Arfgap3,Cd274,Pold4,P2rx3,Vdr,Mcm5,Blm,Mrgpre,Stxbp4,Efna1,Zcchc12,Hells,Cdca7,Hey2,Mlf1ip,Lphn2,Gpr12,Igfbp5,Tgfb3,Chaf1a,Atad2,Brip1,Olfr803,Aebp1,Ect2,Creb3l2,Stil,Cdc42ep5,Sat1,Pdia5,Cenpe,Tro,E2f2,Mcm6,Cdc42se2,Tgfbr1,Enpp1,Itga2,Stat6,Uhrf1,Nr1d1,Mcm4,Dicer1,Tlr4,Eif2ak2,Cbs,Rnd1,Ptgs1,Fb…
GO:0050789	3,2	regulation of biological process	6253	0.4266	68	0.3366	0.001862	D	Serpine1,Anxa5,Zfp667,Lass6,Chek1,Bhlhe40,Ache,Rab31,Mrgprx2,Rhov,Kazald1,Alms1,Adamts9,H60a,Hmgb2,Mcm3,Hipk3,Arfgap3,Cd274,Pold4,P2rx3,Vdr,Mcm5,Blm,Mrgpre,Stxbp4,Efna1,Zcchc12,Hells,Cdca7,Hey2,Mlf1ip,Lphn2,Gpr12,Igfbp5,Tgfb3,Chaf1a,Atad2,Brip1,Olfr803,Aebp1,Ect2,Creb3l2,Stil,Cdc42ep5,Sat1,Pdia5,Cenpe,Pgf,Tro,E2f2,Mcm6,Cdc42se2,Tgfbr1,Enpp1,Anxa2,Itga2,Stat6,Uhrf1,Nr1d1,Mcm4,Dicer1,Tlr4,Eif2ak2,C…
GO:0032501	2	multicellular organismal process	4300	0.2933	41	0.203	0.0009212	D	Serpine1,Anxa5,Ache,Kazald1,Alms1,Serinc5,Pcdh15,H60a,Nasp,Hmgb2,Gins1,Ccnf,P2rx3,Vdr,Cnga3,Scn9a,Blm,Efna1,Hells,Fancd2,Hey2,Igfbp5,Tgfb3,Olfr803,Stil,Rfng,Cenpe,Pgf,Etnk2,Tgfbr1,Enpp1,Exo1,Anxa2,Gria2,Stat6,Uhrf1,Dicer1,Tlr4,Trim71,Olfml3,Ptgs1
GO:0003008	3	system process	1900	0.1296	10	0.0495	8.19121e-05	D	Ache,Alms1,Serinc5,Pcdh15,P2rx3,Vdr,Cnga3,Olfr803,Gria2,Ptgs1
GO:0050877	4	neurological system process	1741	0.1188	8	0.0396	4.85515e-05	D	Ache,Alms1,Serinc5,Pcdh15,P2rx3,Cnga3,Olfr803,Gria2
GO:0007600	6	sensory perception	1469	0.1002	5	0.0248	2.2834e-05	D	Alms1,Pcdh15,P2rx3,Cnga3,Olfr803
GO:0007165	5,4	signal transduction	3499	0.2387	25	0.1238	1.62174e-05	D	Chek1,Ache,Rab31,Mrgprx2,Rhov,Alms1,Hipk3,Arfgap3,Mrgpre,Stxbp4,Efna1,Hey2,Lphn2,Gpr12,Olfr803,Ect2,Stil,Cdc42ep5,Tgfbr1,Itga2,Stat6,Tlr4,Eif2ak2,Cbs,Rnd1
GO:0007154	3	cell communication	3785	0.2582	28	0.1386	1.36241e-05	D	Chek1,Ache,Rab31,Mrgprx2,Rhov,Alms1,Serinc5,Hipk3,Arfgap3,P2rx3,Mrgpre,Stxbp4,Efna1,Hey2,Lphn2,Gpr12,Olfr803,Ect2,Stil,Cdc42ep5,Tgfbr1,Gria2,Itga2,Stat6,Tlr4,Eif2ak2,Cbs,Rnd1
GO:0050890	5	cognition	1539	0.105	5	0.0248	1.00257e-05	D	Alms1,Pcdh15,P2rx3,Cnga3,Olfr803
GO:0007606	7	sensory perception of chemical stimulus	1248	0.0851	2	0.0099	2.48499e-06	D	P2rx3,Olfr803
GO:0007608	8	sensory perception of smell	1173	0.08	1	0.005	7.61708e-07	D	Olfr803
GO:0007166	6,5	cell surface receptor linked signal transduction	2452	0.1673	11	0.0545	7.19186e-07	D	Mrgprx2,Mrgpre,Stxbp4,Efna1,Hey2,Lphn2,Gpr12,Olfr803,Stil,Tgfbr1,Itga2
GO:0007186	7,6	G-protein coupled receptor protein signaling pathway	1776	0.1212	5	0.0248	5.50838e-07	D	Mrgprx2,Mrgpre,Lphn2,Gpr12,Olfr803
