# Supplementary material for: The long non-coding RNA Dali is an epigenetic regulator of neural differentiation
Source: eLife journal article supplement (doi:10.7554/elife.04530), 2014-11-21
Supplement: supp [file elife-04530-supp-v1.zip › elife_poa_e04530_Supplementary_File_3.xlsx]

## Sheet: Transient Pou3f3 KD - 0.1 FDR
ID	Symbol	Name	Ensembl	logFC	AveExpr	t	P.Value	adj.P.Val	B
10568553	Chst15	carbohydrate (N-acetylgalactosamine 4-sulfate 6-O) sulfotransferase 15	ENSMUSG00000030930	-1.03685	8.2587	-11.4133	1.23685e-08	9.3948e-05	9.66068
10472181	Galnt5	UDP-N-acetyl-alpha-D-galactosamine:polypeptide N-acetylgalactosaminyltransferase 5	ENSMUSG00000026828	-1.17936	8.14993	-11.3627	1.31106e-08	9.3948e-05	9.61303
10577315	Angpt2	angiopoietin 2	ENSMUSG00000031465	-1.02156	10.1532	-11.2599	1.47686e-08	9.3948e-05	9.51539
10409602	Trpc7	transient receptor potential cation channel, subfamily C, member 7	ENSMUSG00000021541	-0.888002	9.30512	-10.3345	4.49551e-08	0.000179626	8.58623
10470412	Dbh	dopamine beta hydroxylase	ENSMUSG00000000889	-1.16647	11.8068	-10.226	5.14854e-08	0.000179626	8.47107
10469138	4930412O13Rik	RIKEN cDNA 4930412O13 gene	NA	-1.00746	9.20149	-10.1525	5.64743e-08	0.000179626	8.39231
10595614	Snhg5	small nucleolar RNA host gene 5	NA	0.866076	11.3262	9.89008	7.89033e-08	0.000191011	8.10598
10366457	Ptprr	protein tyrosine phosphatase, receptor type, R	ENSMUSG00000020151	-0.935054	10.4146	-9.87867	8.00719e-08	0.000191011	8.09334
10371296	Glt8d2	glycosyltransferase 8 domain containing 2	ENSMUSG00000020251	-0.91134	8.25672	-9.64595	1.08362e-07	0.000229171	7.83219
10508651	Sdc3	syndecan 3	ENSMUSG00000025743	-0.775936	9.81585	-9.56788	1.20085e-07	0.000229171	7.74309
10487987	Lrrn4	leucine rich repeat neuronal 4	ENSMUSG00000043110	-0.997149	10.2867	-9.33724	1.63262e-07	0.000283245	7.47544
10582180	Fam92b	family with sequence similarity 92, member B	ENSMUSG00000042269	-0.848708	7.97779	-8.68965	3.98756e-07	0.000602839	6.6871
10571114	Erlin2	ER lipid raft associated 2	ENSMUSG00000031483	-0.714143	11.4644	-8.66889	4.10653e-07	0.000602839	6.6609
10564713	Mfge8	milk fat globule-EGF factor 8 protein	ENSMUSG00000030605	1.08601	9.55594	8.61019	4.46367e-07	0.000608462	6.5865
10401673	Tgfb3	transforming growth factor, beta 3	ENSMUSG00000021253	-0.766592	9.72521	-8.30597	6.92111e-07	0.000789244	6.19325
10549420	Tmtc1	transmembrane and tetratricopeptide repeat containing 1	ENSMUSG00000030306	-0.691421	11.5544	-8.30154	6.96608e-07	0.000789244	6.18742
10375956	Fstl4	follistatin-like 4	ENSMUSG00000036264	-0.816183	10.7538	-8.29523	7.03057e-07	0.000789244	6.17912
10488982	Cpne1	copine I	ENSMUSG00000074643	0.731401	10.7091	8.17625	8.37238e-07	0.000887659	6.02159
10502830	Nexn	nexilin	ENSMUSG00000039103	0.831571	6.98846	7.97863	1.12327e-06	0.00112824	5.75544
10491191	Rpl22l1	ribosomal protein L22 like 1	ENSMUSG00000039221	0.700552	8.50626	7.93745	1.19493e-06	0.0011402	5.69927
10493555	Kcnn3	potassium intermediate/small conductance calcium-activated channel, subfamily N, member 3	ENSMUSG00000000794	-0.657956	10.5105	-7.88375	1.2957e-06	0.00117748	5.62564
10562192	Fxyd5	FXYD domain-containing ion transport regulator 5	ENSMUSG00000009687	-0.701721	11.256	-7.71043	1.68679e-06	0.00146321	5.38509
10498647	B3galnt1	UDP-GalNAc:betaGlcNAc beta 1,3-galactosaminyltransferase, polypeptide 1	ENSMUSG00000043300	-0.620626	10.3765	-7.6757	1.77915e-06	0.00147623	5.33635
10365833	Usp44	ubiquitin specific peptidase 44	ENSMUSG00000020020	0.832044	9.42967	7.59962	2.00058e-06	0.0015908	5.22896
10531415	Cxcl10	chemokine (C-X-C motif) ligand 10	ENSMUSG00000034855	0.927691	8.33325	7.52315	2.25264e-06	0.00171296	5.12013
10541683	C1rb	complement component 1, r subcomponent B	ENSMUSG00000092005	0.689399	9.00233	7.50046	2.33373e-06	0.00171296	5.08766
10593270	Ttc12	tetratricopeptide repeat domain 12	ENSMUSG00000040219	0.645085	9.57927	7.43826	2.57206e-06	0.00174879	4.99829
10472350	Gca	grancalcin	ENSMUSG00000026893	0.815033	8.17481	7.43767	2.57445e-06	0.00174879	4.99743
10528474	Rpl22l1	ribosomal protein L22 like 1	ENSMUSG00000039221	0.689578	8.33698	7.40053	2.72906e-06	0.00174879	4.94377
10574427	Impdh2	inosine 5'-phosphate dehydrogenase 2	ENSMUSG00000062867	0.758243	8.10606	7.39588	2.74909e-06	0.00174879	4.93704
10599174	Il13ra1	interleukin 13 receptor, alpha 1	ENSMUSG00000017057	-0.914902	9.93708	-7.33817	3.01099e-06	0.00185361	4.85321
10382838	1810032O08Rik	RIKEN cDNA 1810032O08 gene	NA	0.66725	9.95641	7.30821	3.15715e-06	0.00188285	4.8095
10485695	Gm13939	predicted gene 13939	NA	0.639586	6.03687	7.23162	3.56594e-06	0.00201245	4.69708
10359161	Soat1	sterol O-acyltransferase 1	ENSMUSG00000026600	0.693058	8.83945	7.22821	3.58538e-06	0.00201245	4.69206
10458195	Cdc25c	cell division cycle 25 homolog C (S. pombe)	ENSMUSG00000044201	0.623333	9.17897	7.14891	4.0705e-06	0.0021627	4.57469
10397606	Tshr	thyroid stimulating hormone receptor	ENSMUSG00000020963	-0.82622	7.39057	-7.1475	4.0797e-06	0.0021627	4.5726
10482434	Gtdc1	glycosyltransferase-like domain containing 1	ENSMUSG00000036890	0.651843	10.0474	7.08273	4.52809e-06	0.00233551	4.476
10538247	Npy	neuropeptide Y	ENSMUSG00000029819	-0.72232	9.78694	-6.89525	6.14297e-06	0.00308507	4.1927
10561008	Ceacam1	carcinoembryonic antigen-related cell adhesion molecule 1	ENSMUSG00000074272	-0.627158	7.20354	-6.84108	6.71481e-06	0.00328578	4.10982
10484488	P2rx3	purinergic receptor P2X, ligand-gated ion channel, 3	ENSMUSG00000027071	-0.677628	11.8771	-6.79782	7.21153e-06	0.00344062	4.04331
10488387	Napb	N-ethylmaleimide sensitive fusion protein attachment protein beta	ENSMUSG00000027438	0.658941	11.8163	6.7628	7.64177e-06	0.00352417	3.98925
10500808	Olfml3	olfactomedin-like 3	ENSMUSG00000027848	-0.717914	12.118	-6.75386	7.75598e-06	0.00352417	3.97541
10547869	Leprel2	leprecan-like 2	ENSMUSG00000023191	-0.592224	10.2958	-6.72949	8.07615e-06	0.00358431	3.93765
10499873	Prr9	proline rich 9	ENSMUSG00000056270	-0.779204	6.87967	-6.71259	8.30634e-06	0.00360269	3.91141
10504470	Melk	maternal embryonic leucine zipper kinase	ENSMUSG00000035683	0.623326	9.71132	6.63361	9.47718e-06	0.00401917	3.78815
10477061	Srxn1	sulfiredoxin 1 homolog (S. cerevisiae)	ENSMUSG00000032802	0.637733	10.3181	6.61027	9.8554e-06	0.00408871	3.75153
10588855	Mst1	macrophage stimulating 1 (hepatocyte growth factor-like)	ENSMUSG00000032591	-0.619768	10.2001	-6.59619	1.00912e-05	0.00409744	3.72941
10504730	Anp32b	acidic (leucine-rich) nuclear phosphoprotein 32 family, member B	ENSMUSG00000028333	0.692833	11.6714	6.50406	1.17875e-05	0.00466689	3.58384
10399973	Hdac9	histone deacetylase 9	ENSMUSG00000004698	0.534517	10.72	6.48556	1.21627e-05	0.00466689	3.55445
10526968	Elfn1	leucine rich repeat and fibronectin type III, extracellular 1	ENSMUSG00000048988	-0.577994	8.40556	-6.46732	1.25449e-05	0.00466689	3.52542
10578123	Rbpms	RNA binding protein gene with multiple splicing	ENSMUSG00000031586	0.527224	10.7891	6.46464	1.2602e-05	0.00466689	3.52116
10494428	Txnip	thioredoxin interacting protein	ENSMUSG00000038393	0.772074	10.4373	6.44967	1.29268e-05	0.00466689	3.49728
10523161	Mthfd2l	methylenetetrahydrofolate dehydrogenase (NADP+ dependent) 2-like	ENSMUSG00000029376	0.646194	9.56146	6.44812	1.29609e-05	0.00466689	3.49481
10578690	Neil3	nei like 3 (E. coli)	ENSMUSG00000039396	0.585394	10.8038	6.41232	1.37757e-05	0.00486843	3.43756
10381934	Tanc2	tetratricopeptide repeat, ankyrin repeat and coiled-coil containing 2	ENSMUSG00000053580	-0.561201	10.6715	-6.35535	1.51846e-05	0.00516515	3.34606
10361790	Fuca2	fucosidase, alpha-L- 2, plasma	ENSMUSG00000019810	-0.53845	11.1847	-6.34431	1.54746e-05	0.00516515	3.32827
10407081	Depdc1b	DEP domain containing 1B	ENSMUSG00000021697	0.526651	10.0126	6.34265	1.55187e-05	0.00516515	3.32559
10433656	Mkl2	MKL/myocardin-like 2	ENSMUSG00000009569	-0.549773	10.2091	-6.31631	1.62367e-05	0.00516515	3.28305
10593449	Layn	layilin	ENSMUSG00000060594	-0.567508	9.2543	-6.31439	1.62903e-05	0.00516515	3.27995
10415640	Snora65	small nucleolar RNA, H/ACA box 65	NA	0.561636	10.7387	6.31037	1.64032e-05	0.00516515	3.27345
10439532	Qtrtd1	queuine tRNA-ribosyltransferase domain containing 1	ENSMUSG00000022704	0.563711	9.81901	6.3066	1.65099e-05	0.00516515	3.26736
10483324	Scn9a	sodium channel, voltage-gated, type IX, alpha	ENSMUSG00000075316	-0.668308	10.5663	-6.28673	1.70842e-05	0.00525863	3.23517
10399087	Ncapg2	non-SMC condensin II complex, subunit G2	ENSMUSG00000042029	0.649247	9.71867	6.25823	1.79452e-05	0.00543596	3.18888
10371321	Slc41a2	solute carrier family 41, member 2	ENSMUSG00000034591	-0.606914	11.5714	-6.24646	1.83138e-05	0.00546094	3.16973
10388784	Snord42b	small nucleolar RNA, C/D box 42B	NA	0.547628	10.101	6.2205	1.91551e-05	0.0055835	3.12742
10602977	Scml2	sex comb on midleg-like 2 (Drosophila)	ENSMUSG00000000037	0.721786	8.80482	6.20891	1.95436e-05	0.0055835	3.10849
10461930	D030056L22Rik	RIKEN cDNA D030056L22 gene	ENSMUSG00000047044	0.864419	9.61259	6.20511	1.96726e-05	0.0055835	3.10229
10591123	Fat3	FAT tumor suppressor homolog 3 (Drosophila)	ENSMUSG00000074505	-0.879122	5.86164	-6.19639	1.99725e-05	0.0055835	3.08803
10389775	Pctp	phosphatidylcholine transfer protein	ENSMUSG00000020553	0.564219	9.38291	6.1825	2.046e-05	0.0055835	3.06529
10531737	Hpse	heparanase	ENSMUSG00000035273	0.548852	8.52444	6.18193	2.04802e-05	0.0055835	3.06436
10481772	Garnl3	GTPase activating RANGAP domain-like 3	ENSMUSG00000038860	-0.515764	11.4671	-6.13481	2.22307e-05	0.00593943	2.987
10349319	Sctr	secretin receptor	ENSMUSG00000026387	-0.621975	11.1591	-6.12325	2.26833e-05	0.00593943	2.96798
10522712	Rest	RE1-silencing transcription factor	ENSMUSG00000029249	0.590322	9.1085	6.12234	2.27195e-05	0.00593943	2.96648
10595298	Filip1	filamin A interacting protein 1	ENSMUSG00000034898	0.527702	8.963	6.1015	2.35619e-05	0.006047	2.93211
10593245	Htr3b	5-hydroxytryptamine (serotonin) receptor 3B	ENSMUSG00000008590	-0.539529	8.02432	-6.09539	2.38148e-05	0.006047	2.92203
10368881	Armc2	armadillo repeat containing 2	ENSMUSG00000071324	0.667312	7.56079	6.08903	2.40815e-05	0.006047	2.91151
10416950	Mir18	microRNA 18	NA	0.664402	7.20367	6.06294	2.52077e-05	0.00620395	2.86835
10396849	Rad51l1	RAD51-like 1 (S. cerevisiae)	ENSMUSG00000059060	0.556422	8.55836	6.05958	2.53567e-05	0.00620395	2.86277
10381939	Tanc2	tetratricopeptide repeat, ankyrin repeat and coiled-coil containing 2	ENSMUSG00000053580	-0.627971	9.65382	-6.04049	2.62206e-05	0.0063341	2.83112
10401997	Ptpn21	protein tyrosine phosphatase, non-receptor type 21	ENSMUSG00000021009	0.526473	8.27817	6.01715	2.73193e-05	0.0064393	2.79232
10452633	Tgif1	TGFB-induced factor homeobox 1	ENSMUSG00000047407	0.490965	10.8671	6.01691	2.73309e-05	0.0064393	2.79192
10601583	Mthfd2l	methylenetetrahydrofolate dehydrogenase (NADP+ dependent) 2-like	ENSMUSG00000029376	0.606616	8.38486	6.00884	2.77215e-05	0.00645168	2.7785
10395457	Etv1	ets variant gene 1	ENSMUSG00000004151	-0.618008	10.7105	-5.98709	2.88053e-05	0.00662314	2.74224
10512847	Alg2	asparagine-linked glycosylation 2 homolog (yeast, alpha-1,3-mannosyltransferase)	ENSMUSG00000039740	-0.498356	11.5013	-5.97269	2.95467e-05	0.00671273	2.7182
10462912	Lgi1	leucine-rich repeat LGI family, member 1	ENSMUSG00000067242	-0.574132	12.0527	-5.92575	3.21051e-05	0.00713069	2.63961
10455084	Pcdhb10	protocadherin beta 10	ENSMUSG00000045657	0.492817	7.01463	5.91896	3.24944e-05	0.00713069	2.6282
10601360	Atp7a	ATPase, Cu++ transporting, alpha polypeptide	ENSMUSG00000033792	-0.541163	10.8749	-5.91873	3.25073e-05	0.00713069	2.62783
10498599	Ift80	intraflagellar transport 80 homolog (Chlamydomonas)	ENSMUSG00000027778	0.583655	9.70641	5.91081	3.29674e-05	0.00714944	2.61452
10442069	Lix1	limb expression 1 homolog (chicken)	ENSMUSG00000047786	-0.634023	9.62599	-5.89545	3.3879e-05	0.00726457	2.58869
10365482	Timp3	tissue inhibitor of metalloproteinase 3	ENSMUSG00000020044	0.533772	7.69961	5.87235	3.53e-05	0.00727368	2.54977
10428081	Hrsp12	heat-responsive protein 12	ENSMUSG00000022323	0.53203	7.89004	5.86732	3.56173e-05	0.00727368	2.54129
10469129	4930412O13Rik	RIKEN cDNA 4930412O13 gene	NA	-0.560267	9.27132	-5.86621	3.56877e-05	0.00727368	2.53942
10478847	1500012F01Rik	RIKEN cDNA 1500012F01 gene	ENSMUSG00000074578	0.511156	13.1774	5.86522	3.57505e-05	0.00727368	2.53776
10432492	Faim2	Fas apoptotic inhibitory molecule 2	ENSMUSG00000023011	-0.579412	11.5807	-5.86402	3.58272e-05	0.00727368	2.53573
10565852	Rnf169	ring finger protein 169	ENSMUSG00000058761	0.490994	10.3412	5.85043	3.67057e-05	0.00734119	2.51277
10355500	Igfbp5	insulin-like growth factor binding protein 5	ENSMUSG00000026185	-0.504766	9.49516	-5.8469	3.69369e-05	0.00734119	2.50682
10361799	Adat2	adenosine deaminase, tRNA-specific 2, TAD2 homolog (S. cerevisiae)	ENSMUSG00000019808	0.50478	10.8975	5.84121	3.73137e-05	0.00734119	2.4972
10399005	Crip1	cysteine-rich protein 1 (intestinal)	ENSMUSG00000006360	-0.570549	12.7622	-5.82119	3.8672e-05	0.00753078	2.46331
10421648	Slc25a30	solute carrier family 25, member 30	ENSMUSG00000022003	0.515226	10.7941	5.79354	4.0633e-05	0.00783274	2.4164
10595924	Pik3cb	phosphatidylinositol 3-kinase, catalytic, beta polypeptide	ENSMUSG00000032462	0.551258	9.80702	5.77334	4.21309e-05	0.00801029	2.38206
10567851	Nfatc2ip	nuclear factor of activated T-cells, cytoplasmic, calcineurin-dependent 2 interacting protein	ENSMUSG00000030722	0.529034	8.71579	5.76988	4.23936e-05	0.00801029	2.37617
10380751	Mrpl45	mitochondrial ribosomal protein L45	ENSMUSG00000018882	0.520399	10.271	5.72056	4.63225e-05	0.00866684	2.29205
10599498	Utp14a	UTP14, U3 small nucleolar ribonucleoprotein, homolog A (yeast)	ENSMUSG00000063785	0.539636	9.24482	5.70277	4.7832e-05	0.0088624	2.2616
10559385	Mrgprf	MAS-related GPR, member F	ENSMUSG00000031070	-0.479839	8.67189	-5.691	4.88582e-05	0.00891055	2.24145
10576639	Nrp1	neuropilin 1	ENSMUSG00000025810	-0.51359	11.78	-5.67956	4.98778e-05	0.00891055	2.22183
10406733	Zbed3	zinc finger, BED domain containing 3	ENSMUSG00000041995	0.506469	11.4305	5.67557	5.02388e-05	0.00891055	2.21498
10361995	Fam54a	family with sequence similarity 54, member A	ENSMUSG00000019992	0.526743	9.37744	5.67453	5.03335e-05	0.00891055	2.21319
10514956	Scp2	sterol carrier protein 2, liver	ENSMUSG00000028603	0.533295	8.31096	5.67351	5.04265e-05	0.00891055	2.21144
10495147	Dennd2d	DENN/MADD domain containing 2D	ENSMUSG00000027901	0.482787	9.0685	5.66057	5.16203e-05	0.00896567	2.18921
10466932	Insl6	insulin-like 6	ENSMUSG00000050957	0.590582	8.20294	5.65995	5.1678e-05	0.00896567	2.18815
10584309	BC024479	cDNA sequence BC024479	ENSMUSG00000042138	0.646795	9.06056	5.64089	5.34923e-05	0.00919681	2.15536
10410576	Cep72	centrosomal protein 72	ENSMUSG00000021572	0.468315	9.17691	5.6271	5.48461e-05	0.00934538	2.13161
10462683	Pcgf5	polycomb group ring finger 5	ENSMUSG00000024805	0.487963	9.60504	5.60984	5.65907e-05	0.00949315	2.10184
10429218	Fam135b	family with sequence similarity 135, member B	ENSMUSG00000036800	-0.49957	5.7348	-5.6087	5.67082e-05	0.00949315	2.09987
10513320	Ptgr1	prostaglandin reductase 1	ENSMUSG00000028378	0.649691	8.575	5.59503	5.81344e-05	0.00960022	2.07625
10527559	Polr1d	polymerase (RNA) I polypeptide D	ENSMUSG00000029642	0.590389	9.6236	5.59296	5.83539e-05	0.00960022	2.07267
10372028	Plxnc1	plexin C1	ENSMUSG00000074785	-0.471022	11.9532	-5.58062	5.96785e-05	0.00963907	2.05132
10416952	Mir19a	microRNA 19a	NA	0.548584	5.51871	5.57844	5.99155e-05	0.00963907	2.04755
10526943	Gpr146	G protein-coupled receptor 146	ENSMUSG00000044197	-0.499196	8.69949	-5.57651	6.0126e-05	0.00963907	2.04422
10578222	Dlc1	deleted in liver cancer 1	ENSMUSG00000031523	-0.449733	9.64075	-5.5681	6.10545e-05	0.00963907	2.02964
10355246	Acadl	acyl-Coenzyme A dehydrogenase, long-chain	ENSMUSG00000026003	0.640546	10.1154	5.56755	6.11154e-05	0.00963907	2.02869
10374083	Aebp1	AE binding protein 1	ENSMUSG00000020473	-0.464832	10.7428	-5.5472	6.3426e-05	0.00992149	1.99339
10362294	Arhgap18	Rho GTPase activating protein 18	ENSMUSG00000039031	0.539168	8.42418	5.53646	6.46805e-05	0.0100355	1.97475
10424213	Zhx2	zinc fingers and homeoboxes 2	ENSMUSG00000071757	0.485446	10.441	5.52786	6.57049e-05	0.0101122	1.9598
10591127	Fat3	FAT tumor suppressor homolog 3 (Drosophila)	ENSMUSG00000074505	-0.450161	6.22761	-5.5115	6.77001e-05	0.0103359	1.93133
10526559	Ache	acetylcholinesterase	ENSMUSG00000023328	-0.490885	11.3884	-5.50465	6.85538e-05	0.0103745	1.9194
10518835	Camta1	calmodulin binding transcription activator 1	ENSMUSG00000014592	0.610221	7.87138	5.50032	6.90986e-05	0.0103745	1.91187
10540233	Fam19a1	family with sequence similarity 19, member A1	ENSMUSG00000059187	-0.457637	7.9011	-5.4927	7.007e-05	0.0103745	1.89858
10470392	Adamtsl2	ADAMTS-like 2	ENSMUSG00000036040	-0.462533	8.31297	-5.49225	7.01272e-05	0.0103745	1.8978
10352709	Nsl1	NSL1, MIND kinetochore complex component, homolog (S. cerevisiae)	ENSMUSG00000062510	0.480485	10.1565	5.48078	7.16174e-05	0.0105134	1.87778
10435581	Polq	polymerase (DNA directed), theta	ENSMUSG00000034206	0.481903	9.14625	5.46648	7.35204e-05	0.0107104	1.85281
10569163	Cend1	cell cycle exit and neuronal differentiation 1	ENSMUSG00000060240	-0.469104	10.4415	-5.42803	7.89043e-05	0.0114076	1.78549
10357858	Optc	opticin	ENSMUSG00000010311	-0.460706	9.17746	-5.41546	8.07515e-05	0.0115797	1.76345
10473965	Arhgap1	Rho GTPase activating protein 1	ENSMUSG00000027247	-0.495561	10.7614	-5.41173	8.1308e-05	0.0115797	1.7569
10381962	Ace	angiotensin I converting enzyme (peptidyl-dipeptidase A) 1	ENSMUSG00000020681	-0.566953	10.5729	-5.40742	8.19559e-05	0.0115855	1.74934
10518751	Car6	carbonic anhydrase 6	ENSMUSG00000028972	0.470769	9.99848	5.37911	8.63514e-05	0.0121171	1.69955
10523923	Ccdc18	coiled-coil domain containing 18	ENSMUSG00000056531	0.585756	8.51229	5.36647	8.83908e-05	0.0122027	1.6773
10524909	Nos1	nitric oxide synthase 1, neuronal	ENSMUSG00000029361	-0.466815	9.1599	-5.36562	8.85305e-05	0.0122027	1.67579
10519988	Fam185a	family with sequence similarity 185, member A	ENSMUSG00000047221	0.496216	9.64671	5.36349	8.88794e-05	0.0122027	1.67204
10480035	Pfkfb3	6-phosphofructo-2-kinase/fructose-2,6-biphosphatase 3	ENSMUSG00000026773	0.464327	9.80896	5.35139	9.08908e-05	0.012389	1.65071
10357222	Gm101	predicted gene 101	ENSMUSG00000036962	-0.516637	7.64316	-5.34313	9.22907e-05	0.012389	1.63613
10587508	Ttk	Ttk protein kinase	ENSMUSG00000038379	0.475418	10.2669	5.34079	9.26922e-05	0.012389	1.63199
10345571	Cnga3	cyclic nucleotide gated channel alpha 3	ENSMUSG00000026114	-0.511871	8.78643	-5.338	9.31717e-05	0.012389	1.62707
10371616	Chpt1	choline phosphotransferase 1	ENSMUSG00000060002	0.48167	8.68598	5.33621	9.34819e-05	0.012389	1.6239
10558274	Fam175b	family with sequence similarity 175, member B	ENSMUSG00000030965	0.489075	10.2667	5.32814	9.48912e-05	0.012489	1.60963
10421029	Cdca2	cell division cycle associated 2	ENSMUSG00000048922	0.472424	9.88082	5.31776	9.67336e-05	0.0125678	1.59129
10604447	Gpr119	G-protein coupled receptor 119	ENSMUSG00000051209	-0.600173	7.39511	-5.31735	9.68074e-05	0.0125678	1.59056
10587315	Gsta4	glutathione S-transferase, alpha 4	ENSMUSG00000032348	0.551546	7.73431	5.31149	9.78672e-05	0.0125886	1.58018
10405253	Cplx2	complexin 2	ENSMUSG00000025867	-0.448208	8.9511	-5.30918	9.82866e-05	0.0125886	1.5761
10453811	Greb1l	growth regulation by estrogen in breast cancer-like	ENSMUSG00000042942	-0.513915	9.49969	-5.30449	9.91459e-05	0.012614	1.5678
10516520	Zfp362	zinc finger protein 362	ENSMUSG00000028799	0.435993	10.83	5.28654	0.000102509	0.0129555	1.53597
10545958	Anxa4	annexin A4	ENSMUSG00000029994	0.470479	8.82888	5.2735	0.000105025	0.0130965	1.51284
10540248	Mitf	microphthalmia-associated transcription factor	ENSMUSG00000035158	-0.452331	9.51363	-5.27284	0.000105155	0.0130965	1.51166
10544885	Fkbp14	FK506 binding protein 14	ENSMUSG00000038074	-0.457283	9.0093	-5.27014	0.000105684	0.0130965	1.50687
10501402	Gpsm2	G-protein signalling modulator 2 (AGS3-like, C. elegans)	ENSMUSG00000027883	0.482688	9.41304	5.25577	0.000108551	0.0133651	1.48133
10471608	Cep110	centrosomal protein 110	ENSMUSG00000057110	0.546235	8.87591	5.24528	0.000110694	0.0135415	1.46267
10408656	Eci2	enoyl-Coenzyme A delta isomerase 2	ENSMUSG00000021417	0.428425	9.75094	5.23799	0.000112209	0.0136395	1.44969
10499035	Mnd1	meiotic nuclear divisions 1 homolog (S. cerevisiae)	ENSMUSG00000033752	0.544342	8.52401	5.22862	0.000114188	0.0137922	1.433
10559681	Shisa7	shisa homolog 7 (Xenopus laevis)	ENSMUSG00000053550	-0.433945	9.73475	-5.2201	0.000116018	0.0139251	1.41783
10435841	Spice1	spindle and centriole associated protein 1	ENSMUSG00000043065	0.525212	9.28215	5.21179	0.000117834	0.0140546	1.403
10406423	Mblac2	metallo-beta-lactamase domain containing 2	ENSMUSG00000051098	-0.433199	11.4573	-5.20188	0.000120037	0.0142285	1.38531
10518833	Camta1	calmodulin binding transcription activator 1	ENSMUSG00000014592	0.473762	7.50278	5.18284	0.000124391	0.014601	1.35129
10384145	H2afv	H2A histone family, member V	ENSMUSG00000041126	0.434022	11.6645	5.1795	0.000125172	0.014601	1.34531
10415662	Rcbtb1	regulator of chromosome condensation (RCC1) and BTB (POZ) domain containing protein 1	ENSMUSG00000035469	0.428515	10.6162	5.17821	0.000125475	0.014601	1.343
10455061	Pcdhb4	protocadherin beta 4	ENSMUSG00000045689	0.478783	8.92926	5.17199	0.000126945	0.0146825	1.33188
10593756	Chrna3	cholinergic receptor, nicotinic, alpha polypeptide 3	ENSMUSG00000032303	-0.435431	13.153	-5.16821	0.000127848	0.0146979	1.32511
10577164	Gas6	growth arrest specific 6	ENSMUSG00000031451	-0.432898	9.01558	-5.13688	0.00013559	0.0154947	1.26894
10556413	Micalcl	MICAL C-terminal like	ENSMUSG00000030771	-0.464633	7.76959	-5.13315	0.000136544	0.0155107	1.26225
10547492	Ccdc77	coiled-coil domain containing 77	ENSMUSG00000030177	0.450061	9.36063	5.1252	0.000138599	0.0155206	1.24797
10544487	Tpk1	thiamine pyrophosphokinase	ENSMUSG00000029735	0.420209	8.76644	5.12442	0.000138802	0.0155206	1.24658
10497971	Sclt1	sodium channel and clathrin linker 1	ENSMUSG00000059834	0.525525	7.75783	5.12339	0.000139071	0.0155206	1.24473
10559741	Vmn1r58	vomeronasal 1 receptor 58	ENSMUSG00000078808	-0.493503	4.82114	-5.1156	0.000141123	0.0156581	1.23074
10398907	Pld4	phospholipase D family, member 4	ENSMUSG00000052160	-0.541266	8.47216	-5.10083	0.000145102	0.0160065	1.20416
10516393	Eif2c4	eukaryotic translation initiation factor 2C, 4	ENSMUSG00000042500	0.432877	8.14817	5.08582	0.000149263	0.0163709	1.17715
10500666	Ptgfrn	prostaglandin F2 receptor negative regulator	ENSMUSG00000027864	0.454372	9.07422	5.07759	0.000151597	0.0165318	1.16232
10372781	Irak3	interleukin-1 receptor-associated kinase 3	ENSMUSG00000020227	0.466444	8.57227	5.06349	0.000155686	0.0168332	1.13687
10366293	Csrp2	cysteine and glycine-rich protein 2	ENSMUSG00000020186	0.459226	10.9232	5.062	0.000156124	0.0168332	1.13419
10478474	Rbpjl	recombination signal binding protein for immunoglobulin kappa J region-like	ENSMUSG00000017007	-0.418597	8.77766	-5.05342	0.000158674	0.0170119	1.1187
10513592	Wdr31	WD repeat domain 31	ENSMUSG00000028391	0.492059	9.73893	5.03975	0.000162827	0.0173404	1.094
10498871	Tmem144	transmembrane protein 144	ENSMUSG00000027956	0.471052	8.58024	5.03413	0.000164566	0.0173404	1.08384
10352320	Tmem63a	transmembrane protein 63a	ENSMUSG00000026519	0.467567	9.35824	5.03242	0.000165101	0.0173404	1.08074
10601850	Bex4	brain expressed gene 4	ENSMUSG00000047844	0.486432	7.05191	5.03155	0.000165372	0.0173404	1.07917
10549733	A430110N23Rik	RIKEN cDNA A430110N23 gene	ENSMUSG00000035279	-0.478256	9.83595	-5.01779	0.000169735	0.0177007	1.05427
10406934	Etv1	ets variant gene 1	ENSMUSG00000004151	-0.444767	11.4717	-5.01322	0.00017121	0.0177574	1.046
10495316	Psrc1	proline/serine-rich coiled-coil 1	ENSMUSG00000068744	0.464989	10.0288	4.99165	0.000178355	0.0183574	1.0069
10369704	Hnrnph3	heterogeneous nuclear ribonucleoprotein H3	ENSMUSG00000020069	0.448492	10.9503	4.98999	0.000178918	0.0183574	1.00388
10436865	Ifngr2	interferon gamma receptor 2	ENSMUSG00000022965	-0.425353	12.4633	-4.98527	0.000180528	0.01839	0.995314
10563583	Saal1	serum amyloid A-like 1	ENSMUSG00000006763	0.465576	10.4025	4.98342	0.000181163	0.01839	0.991956
10364593	Cnn2	calponin 2	ENSMUSG00000004665	0.511345	11.6431	4.97697	0.000183392	0.0185178	0.980258
10515431	Kif2c	kinesin family member 2C	ENSMUSG00000028678	0.459647	10.453	4.96787	0.000186591	0.0187264	0.963718
10571415	Vps37a	vacuolar protein sorting 37A (yeast)	ENSMUSG00000031600	-0.438404	11.4281	-4.96553	0.000187421	0.0187264	0.959474
10562211	Fxyd1	FXYD domain-containing ion transport regulator 1	ENSMUSG00000036570	0.421176	8.49845	4.96251	0.0001885	0.0187361	0.953984
10429203	Fam135b	family with sequence similarity 135, member B	ENSMUSG00000036800	-0.421732	7.07276	-4.95852	0.000189935	0.0187809	0.946729
10405781	Mir27b	microRNA 27b	NA	0.551075	7.04492	4.94938	0.000193264	0.0190116	0.930108
10379779	Ddx52	DEAD (Asp-Glu-Ala-Asp) box polypeptide 52	ENSMUSG00000020677	0.431549	10.6635	4.93146	0.00019997	0.0194629	0.897472
10362073	Sgk1	serum/glucocorticoid regulated kinase 1	ENSMUSG00000019970	0.476287	10.2545	4.93061	0.000200294	0.0194629	0.895924
10359689	Atp1b1	ATPase, Na+/K+ transporting, beta 1 polypeptide	ENSMUSG00000026576	-0.460097	11.6563	-4.92899	0.000200912	0.0194629	0.892976
10435329	Ccdc14	coiled-coil domain containing 14	ENSMUSG00000022833	0.509713	8.74997	4.9226	0.000203371	0.0196017	0.881334
10592289	Ccdc15	coiled-coil domain containing 15	ENSMUSG00000034303	0.507249	8.71138	4.91935	0.000204635	0.0196244	0.875408
10465861	Incenp	inner centromere protein	ENSMUSG00000024660	0.430479	10.5812	4.91589	0.000205989	0.0196554	0.869098
10511333	Plag1	pleiomorphic adenoma gene 1	ENSMUSG00000003282	0.430086	7.43569	4.90729	0.000209394	0.0198658	0.853407
10390746	Top2a	topoisomerase (DNA) II alpha	ENSMUSG00000020914	-0.551536	5.69342	-4.90509	0.000210275	0.0198658	0.849392
10541877	Vamp1	vesicle-associated membrane protein 1	ENSMUSG00000030337	-0.400111	8.75151	-4.90118	0.000211851	0.0199161	0.842245
10569542	Mrgpre	MAS-related GPR, member E	ENSMUSG00000048965	-0.495357	9.32948	-4.89852	0.000212929	0.0199193	0.83739
10571680	Mlf1ip	myeloid leukemia factor 1 interacting protein	ENSMUSG00000031629	0.498461	10.5492	4.88497	0.000218506	0.0203413	0.812644
10430871	Tdg	thymine DNA glycosylase	ENSMUSG00000034674	0.435375	11.717	4.88117	0.0002201	0.0203902	0.805688
10466745	Tjp2	tight junction protein 2	ENSMUSG00000024812	0.40821	9.54667	4.87378	0.000223228	0.0204141	0.792184
10429222	Fam135b	family with sequence similarity 135, member B	ENSMUSG00000036800	-0.442684	7.28743	-4.87151	0.0002242	0.0204141	0.788024
10588357	Acad11	acyl-Coenzyme A dehydrogenase family, member 11	ENSMUSG00000090150	-0.419422	9.53611	-4.87081	0.0002245	0.0204141	0.786743
10350800	Tor1aip2	torsin A interacting protein 2	c(\ENSMUSG00000050565\", \"ENSMUSG00000079252\")"	-0.445538	9.89727	-4.87008	0.000224815	0.0204141	0.785403
10554704	Mesdc2	mesoderm development candidate 2	ENSMUSG00000038503	-0.419786	11.3778	-4.8678	0.000225795	0.0204141	0.781239
10581957	0610007P22Rik	RIKEN cDNA 0610007P22 gene	ENSMUSG00000015126	0.412289	9.99398	4.86553	0.000226775	0.0204141	0.777093
10409261	Diras2	DIRAS family, GTP-binding RAS-like 2	ENSMUSG00000047842	-0.456285	10.8384	-4.86007	0.000229157	0.0205006	0.767093
10356780	Pask	PAS domain containing serine/threonine kinase	ENSMUSG00000026274	0.440248	9.53318	4.85841	0.000229885	0.0205006	0.764059
10358457	Bex4	brain expressed gene 4	ENSMUSG00000047844	0.602145	6.55499	4.85174	0.000232841	0.0206676	0.751827
10462454	Uhrf2	ubiquitin-like, containing PHD and RING finger domains 2	ENSMUSG00000024817	0.509562	11.2834	4.84196	0.000237238	0.0208944	0.73392
10362581	Tube1	epsilon-tubulin 1	ENSMUSG00000019845	0.480501	10.0573	4.8412	0.000237586	0.0208944	0.732518
10577219	AF366264	cDNA sequence AF366264	ENSMUSG00000057116	-0.476133	6.11706	-4.83721	0.000239407	0.020958	0.725208
10445308	Cyp39a1	cytochrome P450, family 39, subfamily a, polypeptide 1	ENSMUSG00000023963	0.412672	9.25306	4.83326	0.000241224	0.0210206	0.717969
10350297	Kif14	kinesin family member 14	ENSMUSG00000041498	0.47564	9.77582	4.81899	0.000247917	0.0214483	0.691768
10492558	Smc4	structural maintenance of chromosomes 4	ENSMUSG00000034349	0.431459	11.9383	4.81802	0.000248379	0.0214483	0.689986
10455050	Pcdhb2	protocadherin beta 2	ENSMUSG00000051599	0.450357	7.47297	4.80719	0.000253592	0.0217997	0.670102
10594426	Zwilch	Zwilch, kinetochore associated, homolog (Drosophila)	ENSMUSG00000032400	0.472188	10.671	4.79807	0.00025807	0.0220853	0.65334
10535732	Gpr12	G-protein coupled receptor 12	ENSMUSG00000041468	-0.410236	8.79086	-4.78327	0.000265511	0.0226206	0.626124
10585180	Ncam1	neural cell adhesion molecule 1	ENSMUSG00000039542	-0.423024	7.93462	-4.77941	0.000267492	0.0226881	0.619005
10433721	Nde1	nuclear distribution gene E homolog 1 (A nidulans)	ENSMUSG00000022678	0.417033	9.94968	4.77605	0.000269221	0.0227328	0.612834
10435617	Rabl3	RAB, member of RAS oncogene family-like 3	ENSMUSG00000022827	0.424069	11.3526	4.77378	0.000270402	0.0227328	0.608645
10432362	Rhebl1	Ras homolog enriched in brain like 1	ENSMUSG00000023755	0.459266	8.81053	4.76792	0.000273465	0.0228895	0.597859
10375313	Ccnjl	cyclin J-like	ENSMUSG00000044707	0.458673	9.80541	4.75626	0.000279672	0.0232073	0.576366
10601011	Kif4	kinesin family member 4	ENSMUSG00000034311	0.44695	10.2252	4.75522	0.000280233	0.0232073	0.574446
10499545	Efna3	ephrin A3	ENSMUSG00000028039	-0.526031	9.20613	-4.75396	0.00028091	0.0232073	0.572137
10483326	Scn9a	sodium channel, voltage-gated, type IX, alpha	ENSMUSG00000075316	-0.462508	11.3182	-4.74205	0.00028743	0.0236436	0.550162
10601705	Cenpi	centromere protein I	ENSMUSG00000031262	0.528544	9.34429	4.72723	0.000295761	0.0242245	0.522796
10368883	Tdg	thymine DNA glycosylase	ENSMUSG00000034674	0.420733	11.7216	4.7146	0.000303051	0.0247155	0.499476
10362426	Trdn	triadin	ENSMUSG00000019787	0.790149	6.07279	4.71147	0.000304889	0.0247596	0.493684
10459827	Rnf165	ring finger protein 165	ENSMUSG00000025427	0.396937	10.8094	4.70473	0.000308884	0.02485	0.481216
10529656	Nsg1	neuron specific gene family member 1	ENSMUSG00000029126	-0.40264	10.4099	-4.70413	0.000309241	0.02485	0.480107
10455054	Pcdhb3	protocadherin beta 3	ENSMUSG00000045498	0.467907	7.72177	4.7012	0.000310994	0.02485	0.474695
10508697	Srsf4	serine/arginine-rich splicing factor 4	ENSMUSG00000028911	0.391175	11.6462	4.70084	0.000311211	0.02485	0.474026
10594251	Kif23	kinesin family member 23	ENSMUSG00000032254	0.403673	11.3922	4.69529	0.000314567	0.0248601	0.463752
10450614	2310061I04Rik	RIKEN cDNA 2310061I04 gene	ENSMUSG00000050705	0.396357	10.4715	4.69422	0.000315215	0.0248601	0.46178
10453399	Srbd1	S1 RNA binding domain 1	ENSMUSG00000024135	0.407043	9.80098	4.69333	0.000315761	0.0248601	0.460122
10498775	Golim4	golgi integral membrane protein 4	ENSMUSG00000034109	0.456449	10.1259	4.69204	0.000316548	0.0248601	0.45774
10453797	Greb1l	growth regulation by estrogen in breast cancer-like	ENSMUSG00000042942	-0.455787	10.0448	-4.68559	0.00032052	0.0249337	0.445793
10365003	Snord37	small nucleolar RNA, C/D box 37	NA	0.659358	8.21356	4.68498	0.000320897	0.0249337	0.444666
10487937	Prokr2	prokineticin receptor 2	ENSMUSG00000050558	-0.390984	8.04186	-4.68416	0.000321405	0.0249337	0.443152
10426689	Spats2	spermatogenesis associated, serine-rich 2	ENSMUSG00000051934	0.398182	11.3507	4.67711	0.00032582	0.0250813	0.430085
10498053	4930583H14Rik	RIKEN cDNA 4930583H14 gene	ENSMUSG00000037161	0.447221	10.3801	4.67692	0.000325936	0.0250813	0.429741
10354868	Fam126b	family with sequence similarity 126, member B	ENSMUSG00000038174	0.419608	9.23258	4.67003	0.000330308	0.025119	0.416978
10476252	Cdc25b	cell division cycle 25 homolog B (S. pombe)	ENSMUSG00000027330	0.377159	10.687	4.66954	0.000330622	0.025119	0.416067
10407211	Ppap2a	phosphatidic acid phosphatase type 2A	ENSMUSG00000021759	-0.409012	12.2102	-4.66914	0.000330878	0.025119	0.415325
10472916	Cdca7	cell division cycle associated 7	ENSMUSG00000055612	0.607027	10.4621	4.66787	0.000331691	0.025119	0.412977
10428089	Nipal2	NIPA-like domain containing 2	ENSMUSG00000038879	-0.516044	8.63916	-4.65994	0.000336824	0.0254069	0.398263
10412562	Flnb	filamin, beta	ENSMUSG00000025278	-0.400967	10.982	-4.65247	0.000341729	0.0256754	0.384414
10375175	Slit3	slit homolog 3 (Drosophila)	ENSMUSG00000056427	-0.429814	11.116	-4.64585	0.000346144	0.0257776	0.372117
10535883	Katnal1	katanin p60 subunit A-like 1	ENSMUSG00000041298	0.430239	10.1576	4.64559	0.000346317	0.0257776	0.371636
10352294	BC031781	cDNA sequence BC031781	ENSMUSG00000038806	0.38943	10.879	4.64436	0.000347142	0.0257776	0.369359
10375214	Mir218-2	microRNA 218-2	NA	-0.429114	7.57303	-4.64122	0.000349265	0.0258348	0.363517
10380699	Copz2	coatomer protein complex, subunit zeta 2	ENSMUSG00000018672	0.457935	9.85745	4.63297	0.000354889	0.0261494	0.348213
10367041	Rdh9	retinol dehydrogenase 9	ENSMUSG00000056148	0.567387	7.38154	4.62734	0.000358785	0.0263348	0.337753
10507040	Spata6	spermatogenesis associated 6	ENSMUSG00000034401	0.522522	9.4976	4.61785	0.000365454	0.0266349	0.320107
10578964	1810029B16Rik	RIKEN cDNA 1810029B16 gene	ENSMUSG00000025591	0.4373	10.0657	4.61756	0.000365664	0.0266349	0.319556
10368289	Enpp1	ectonucleotide pyrophosphatase/phosphodiesterase 1	ENSMUSG00000037370	-0.406244	12.2828	-4.61367	0.000368431	0.0267343	0.312335
10528546	Gabarapl2	gamma-aminobutyric acid (GABA) A receptor-associated protein-like 2	ENSMUSG00000031950	-0.404308	13.0515	-4.60914	0.000371687	0.0268684	0.303904
10356329	Snora75	small nucleolar RNA, H/ACA box 75	NA	0.501653	7.33978	4.60575	0.000374143	0.026944	0.297593
10594221	Lrrc49	leucine rich repeat containing 49	ENSMUSG00000047766	0.379179	10.7387	4.60282	0.000376274	0.0269955	0.292152
10391963	Nsf	N-ethylmaleimide sensitive fusion protein	ENSMUSG00000034187	0.383714	11.1617	4.6	0.00037834	0.0270283	0.286905
10429114	Tmem71	transmembrane protein 71	ENSMUSG00000036944	0.467146	7.57617	4.59687	0.000380653	0.0270283	0.281065
10599187	Zcchc12	zinc finger, CCHC domain containing 12	ENSMUSG00000036699	-0.39498	10.6791	-4.59642	0.00038098	0.0270283	0.280243
10416736	6720463M24Rik	RIKEN cDNA 6720463M24 gene	ENSMUSG00000022070	0.421546	9.63898	4.58895	0.000386555	0.0271506	0.266323
10554938	Rab30	RAB30, member RAS oncogene family	ENSMUSG00000030643	0.570766	8.98581	4.58657	0.000388349	0.0271506	0.261887
10457054	Zadh2	zinc binding alcohol dehydrogenase, domain containing 2	ENSMUSG00000049090	0.430379	10.1604	4.58623	0.0003886	0.0271506	0.261267
10526838	Got2	glutamate oxaloacetate transaminase 2, mitochondrial	ENSMUSG00000031672	-0.397962	11.2706	-4.5861	0.000388701	0.0271506	0.26102
10510254	Fv1	Friend virus susceptibility 1	ENSMUSG00000070583	0.392251	8.31378	4.58163	0.000392094	0.0271506	0.252691
10520521	Cenpa	centromere protein A	ENSMUSG00000029177	0.419269	11.1145	4.57929	0.000393884	0.0271506	0.248326
10367822	Rab32	RAB32, member RAS oncogene family	ENSMUSG00000019832	0.389752	9.10449	4.57909	0.000394035	0.0271506	0.24796
10366983	Tmem194	transmembrane protein 194	ENSMUSG00000040195	0.497252	10.8275	4.57903	0.000394085	0.0271506	0.247838
10394245	Dnajc27	DnaJ (Hsp40) homolog, subfamily C, member 27	ENSMUSG00000020657	0.414515	9.32919	4.57548	0.00039681	0.0271905	0.241236
10411728	Cenph	centromere protein H	ENSMUSG00000045273	0.584708	9.44757	4.57457	0.000397514	0.0271905	0.239536
10592201	Chek1	checkpoint kinase 1 homolog (S. pombe)	ENSMUSG00000032113	0.43831	10.8104	4.56831	0.000402391	0.0274179	0.227851
10453436	Mcfd2	multiple coagulation factor deficiency 2	ENSMUSG00000024150	-0.444291	9.30173	-4.56662	0.000403711	0.0274179	0.224713
10507804	Trit1	tRNA isopentenyltransferase 1	ENSMUSG00000028653	0.497059	9.9613	4.56282	0.000406708	0.0275235	0.217626
10471721	Ptgs1	prostaglandin-endoperoxide synthase 1	ENSMUSG00000047250	-0.414441	11.8944	-4.55822	0.000410372	0.0275802	0.209034
10412267	Itga2	integrin alpha 2	ENSMUSG00000015533	-0.428439	10.2323	-4.55814	0.000410436	0.0275802	0.208883
10488029	Zfand1	zinc finger, AN1-type domain 1	ENSMUSG00000039795	0.397016	10.0472	4.55066	0.000416455	0.0278864	0.194934
10410877	Polr3g	polymerase (RNA) III (DNA directed) polypeptide G	ENSMUSG00000035834	-0.436538	11.2003	-4.54873	0.000418023	0.0278935	0.191333
10524310	Ttc28	tetratricopeptide repeat domain 28	NA	-0.448739	10.5769	-4.54586	0.000420368	0.0279523	0.185972
10511679	Decr1	2,4-dienoyl CoA reductase 1, mitochondrial	ENSMUSG00000028223	0.408388	8.8374	4.53867	0.000426302	0.0280812	0.172539
10475800	Adra2b	adrenergic receptor, alpha 2b	ENSMUSG00000058620	-0.404913	9.24769	-4.53854	0.000426411	0.0280812	0.172294
10360105	Usp21	ubiquitin specific peptidase 21	ENSMUSG00000053483	0.3721	11.5171	4.53816	0.000426722	0.0280812	0.171596
10497300	Zfand1	zinc finger, AN1-type domain 1	ENSMUSG00000039795	0.394038	10.1255	4.52404	0.000438637	0.0286694	0.145206
10382844	Snord1c	small nucleolar RNA, C/D box 1C	NA	0.480358	5.82926	4.52051	0.000441669	0.0286694	0.138604
10386093	Snord1c	small nucleolar RNA, C/D box 1C	NA	0.480358	5.82926	4.52051	0.000441669	0.0286694	0.138604
10583264	Mre11a	meiotic recombination 11 homolog A (S. cerevisiae)	ENSMUSG00000031928	0.418348	10.2502	4.51908	0.000442898	0.0286694	0.135942
10590892	Cep57	centrosomal protein 57	ENSMUSG00000031922	0.438389	10.4499	4.51877	0.000443171	0.0286694	0.135351
10386844	Zswim7	zinc finger, SWIM-type containing 7	ENSMUSG00000014243	0.511537	8.39042	4.51475	0.000446659	0.0287974	0.127838
10365230	Tdg	thymine DNA glycosylase	ENSMUSG00000034674	0.406897	11.461	4.51247	0.000448655	0.0288287	0.123566
10385616	Rufy1	RUN and FYVE domain containing 1	ENSMUSG00000020375	0.413453	9.70017	4.50658	0.000453844	0.029033	0.112546
10584236	Pate2	prostate and testis expressed 2	ENSMUSG00000074452	0.440488	7.86286	4.50311	0.000456921	0.029033	0.10607
10454015	Ttc39c	tetratricopeptide repeat domain 39C	ENSMUSG00000024424	0.420978	8.74152	4.50205	0.000457876	0.029033	0.10407
10420080	Mdp1	magnesium-dependent phosphatase 1	ENSMUSG00000002329	0.391596	9.66315	4.502	0.00045792	0.029033	0.103979
10582649	Pgbd5	piggyBac transposable element derived 5	ENSMUSG00000050751	0.42119	9.14805	4.49283	0.000466195	0.0291923	0.0868155
10416843	Cln5	ceroid-lipofuscinosis, neuronal 5	ENSMUSG00000022125	-0.380044	9.48497	-4.49279	0.000466229	0.0291923	0.0867449
10507334	Ccdc163	coiled-coil domain containing 163	ENSMUSG00000028689	0.388288	8.63711	4.49113	0.000467748	0.0291923	0.0836271
10413803	Btd	biotinidase	ENSMUSG00000021900	-0.440464	8.48288	-4.49039	0.000468421	0.0291923	0.0822506
10372324	Syt1	synaptotagmin I	ENSMUSG00000035864	-0.398851	13.2169	-4.48861	0.000470054	0.0291923	0.0789152
10565813	Snord15a	small nucleolar RNA, C/D box 15A	NA	0.485684	8.25027	4.48639	0.000472095	0.0291923	0.0747633
10590182	Exog	endo/exonuclease (5'-3'), endonuclease G-like	ENSMUSG00000042787	0.427403	8.92214	4.48483	0.000473539	0.0291923	0.0718358
10440794	2610039C10Rik	RIKEN cDNA 2610039C10 gene	ENSMUSG00000022978	0.411354	9.61269	4.48445	0.000473891	0.0291923	0.0711233
10459183	Slc26a2	solute carrier family 26 (sulfate transporter), member 2	ENSMUSG00000034320	-0.415269	8.97492	-4.48412	0.000474199	0.0291923	0.0705024
10354432	Myo1b	myosin IB	ENSMUSG00000018417	0.430545	10.8736	4.4819	0.000476262	0.029225	0.0663425
10445796	AI314976	expressed sequence AI314976	ENSMUSG00000040771	0.431775	8.37223	4.46943	0.000488021	0.029603	0.042968
10564663	Tdg	thymine DNA glycosylase	ENSMUSG00000034674	0.394657	11.7063	4.4679	0.000489485	0.029603	0.0400979
10455080	Pcdhb9	protocadherin beta 9	ENSMUSG00000051242	0.468022	6.36415	4.46618	0.000491129	0.029603	0.0368843
10406845	Foxd1	forkhead box D1	ENSMUSG00000078302	0.647051	11.1668	4.46596	0.000491344	0.029603	0.0364648
10485597	Depdc7	DEP domain containing 7	ENSMUSG00000027173	0.539435	7.7716	4.46449	0.000492763	0.029603	0.0337004
10556463	Arntl	aryl hydrocarbon receptor nuclear translocator-like	ENSMUSG00000055116	0.407554	9.5779	4.46434	0.000492905	0.029603	0.0334238
10434233	Ufd1l	ubiquitin fusion degradation 1 like	ENSMUSG00000005262	0.381181	10.9689	4.46395	0.00049328	0.029603	0.0326965
10457357	Mpp7	membrane protein, palmitoylated 7 (MAGUK p55 subfamily member 7)	ENSMUSG00000057440	0.503339	7.00619	4.46016	0.00049695	0.029633	0.0255915
10535979	Rfc3	replication factor C (activator 1) 3	ENSMUSG00000033970	0.525831	10.9247	4.45983	0.000497272	0.029633	0.0249715
10378013	Rpain	RPA interacting protein	ENSMUSG00000018449	0.396088	8.97538	4.45864	0.000498437	0.029633	0.0227284
10457546	Osbpl1a	oxysterol binding protein-like 1A	ENSMUSG00000044252	0.420439	8.62218	4.45225	0.00050471	0.0299127	0.0107428
10580191	Nfix	nuclear factor I/X	ENSMUSG00000001911	0.373039	9.75632	4.44756	0.000509361	0.0300949	0.00195316
10591118	Fat3	FAT tumor suppressor homolog 3 (Drosophila)	ENSMUSG00000074505	-0.422163	6.7236	-4.44368	0.000513253	0.0302312	-0.00534226
10371907	Nedd1	neural precursor cell expressed, developmentally down-regulated gene 1	ENSMUSG00000019988	0.418994	9.93109	4.44155	0.000515401	0.0302644	-0.00934525
10422009	Dppa2	developmental pluripotency associated 2	ENSMUSG00000072419	-0.426288	10.3815	-4.43629	0.00052074	0.0304547	-0.0192219
10373192	Inhbe	inhibin beta E	ENSMUSG00000047492	-0.463384	7.89636	-4.43521	0.000521835	0.0304547	-0.0212343
10381118	Gast	gastrin	ENSMUSG00000017165	-0.372141	8.65007	-4.43098	0.000526179	0.0305734	-0.0291795
10460738	Cdca5	cell division cycle associated 5	ENSMUSG00000024791	0.393525	10.0305	4.43012	0.000527072	0.0305734	-0.0308034
10603425	Glod5	glyoxalase domain containing 5	ENSMUSG00000031163	0.521153	7.85082	4.42567	0.000531689	0.0305958	-0.0391611
10555323	P4ha3	procollagen-proline, 2-oxoglutarate 4-dioxygenase (proline 4-hydroxylase), alpha polypeptide III	ENSMUSG00000051048	-0.487093	8.4578	-4.42481	0.000532585	0.0305958	-0.040776
10489569	Pltp	phospholipid transfer protein	ENSMUSG00000017754	0.462333	11.0306	4.42459	0.000532816	0.0305958	-0.0411913
10450920	AY036118	cDNA sequence AY036118	NA	-0.393005	10.8581	-4.42358	0.000533871	0.0305958	-0.0430877
10547386	Adipor2	adiponectin receptor 2	ENSMUSG00000030168	0.385617	11.0337	4.41756	0.000540215	0.0308666	-0.0544074
10369867	Tfam	transcription factor A, mitochondrial	ENSMUSG00000003923	0.394752	9.88721	4.40851	0.000549893	0.0313259	-0.0714253
10402783	Ahnak2	AHNAK nucleoprotein 2	ENSMUSG00000072812	-0.440167	7.44004	-4.40441	0.000554336	0.0314849	-0.0791357
10471715	Mrrf	mitochondrial ribosome recycling factor	ENSMUSG00000026887	0.399012	12.0211	4.40121	0.000557824	0.031589	-0.0851473
10427015	Acvr1b	activin A receptor, type 1B	ENSMUSG00000000532	0.442376	10.0609	4.39496	0.000564716	0.0318847	-0.0969151
10448182	Mir703	microRNA 703	NA	0.403667	12.2927	4.38716	0.000573431	0.032052	-0.111592
10482500	Rnd3	Rho family GTPase 3	ENSMUSG00000017144	0.425386	9.64673	4.38673	0.000573919	0.032052	-0.112407
10495416	Vav3	vav 3 oncogene	ENSMUSG00000033721	0.427713	8.34616	4.38515	0.000575706	0.032052	-0.115387
10487392	Kcnip3	Kv channel interacting protein 3, calsenilin	ENSMUSG00000079056	-0.42345	10.9554	-4.38463	0.000576291	0.032052	-0.11636
10423821	Baalc	brain and acute leukemia, cytoplasmic	ENSMUSG00000022296	-0.397382	7.73521	-4.38309	0.000578036	0.032052	-0.119257
10500445	Chd1l	chromodomain helicase DNA binding protein 1-like	ENSMUSG00000028089	0.414969	8.91667	4.38206	0.000579209	0.032052	-0.121201
10436830	Ifnar2	interferon (alpha and beta) receptor 2	ENSMUSG00000022971	0.36971	11.813	4.38186	0.000579435	0.032052	-0.121573
10357875	Btg2	B-cell translocation gene 2, anti-proliferative	ENSMUSG00000020423	-0.392822	8.82262	-4.37995	0.000581612	0.0320794	-0.125168
10475648	Dtwd1	DTW domain containing 1	ENSMUSG00000023330	0.376403	10.2639	4.37749	0.000584435	0.0321423	-0.129809
10351047	Cenpl	centromere protein L	ENSMUSG00000026708	0.417128	7.75132	4.37122	0.000591689	0.0322612	-0.14163
10475532	Sqrdl	sulfide quinone reductase-like (yeast)	ENSMUSG00000005803	0.397984	7.1049	4.37103	0.000591905	0.0322612	-0.141979
10593293	Ncam1	neural cell adhesion molecule 1	ENSMUSG00000039542	-0.375401	13.1304	-4.37025	0.000592811	0.0322612	-0.143444
10567663	Palb2	partner and localizer of BRCA2	ENSMUSG00000044702	0.407906	8.40746	4.36746	0.000596081	0.0322612	-0.148717
10517287	Man1c1	mannosidase, alpha, class 1C, member 1	ENSMUSG00000037306	-0.41864	12.0815	-4.36648	0.000597221	0.0322612	-0.150547
10538482	Adcyap1r1	adenylate cyclase activating polypeptide 1 receptor 1	ENSMUSG00000029778	-0.38941	12.8465	-4.3658	0.000598018	0.0322612	-0.151826
10392259	Smurf2	SMAD specific E3 ubiquitin protein ligase 2	ENSMUSG00000018363	0.3809	9.3049	4.36545	0.000598432	0.0322612	-0.152488
10351026	Gas5	growth arrest specific 5	NA	0.416326	11.8787	4.36382	0.000600354	0.0322737	-0.155561
10547100	Plxnd1	plexin D1	ENSMUSG00000030123	-0.415682	10.1785	-4.34971	0.000617254	0.0329703	-0.182165
10582669	Ttc13	tetratricopeptide repeat domain 13	ENSMUSG00000037300	-0.377439	10.6914	-4.34871	0.000618474	0.0329703	-0.184058
10401684	Angel1	angel homolog 1 (Drosophila)	ENSMUSG00000021257	0.392026	9.69944	4.34869	0.000618495	0.0329703	-0.18409
10449236	Nme4	non-metastatic cells 4, protein expressed in	ENSMUSG00000024177	0.462331	9.33505	4.33733	0.00063249	0.0336224	-0.205533
10400321	1110002B05Rik	RIKEN cDNA 1110002B05 gene	ENSMUSG00000044408	0.438876	8.3646	4.33475	0.000635714	0.0336999	-0.210405
10587299	Ick	intestinal cell kinase	ENSMUSG00000009828	0.381054	10.1954	4.33233	0.000638744	0.0337667	-0.214961
10387723	2810408A11Rik	RIKEN cDNA 2810408A11 gene	ENSMUSG00000018570	0.43058	8.84276	4.33082	0.000640645	0.0337737	-0.217809
10461158	Snhg1	small nucleolar RNA host gene (non-protein coding) 1	NA	0.503843	9.35235	4.3261	0.00064663	0.0338195	-0.22672
10490986	4632415L05Rik	RRS1 ribosome biogenesis regulator homolog pseudogene	NA	0.467058	8.48664	4.32554	0.000647356	0.0338195	-0.227795
10443007	Neurl1b	neuralized homolog 1b (Drosophila)	ENSMUSG00000034413	0.391025	9.93279	4.32474	0.000648369	0.0338195	-0.229294
10556082	Ppfibp2	PTPRF interacting protein, binding protein 2 (liprin beta 2)	ENSMUSG00000036528	0.389417	11.8989	4.32456	0.000648603	0.0338195	-0.22964
10528702	Prkag2	protein kinase, AMP-activated, gamma 2 non-catalytic subunit	ENSMUSG00000028944	0.370616	10.0796	4.32213	0.000651721	0.0338895	-0.234234
10467637	Arhgap19	Rho GTPase activating protein 19	ENSMUSG00000025154	0.355183	11.3171	4.31807	0.000656951	0.0340686	-0.241894
10420426	F630043A04Rik	RIKEN cDNA F630043A04 gene	ENSMUSG00000021965	0.465736	10.591	4.31343	0.000662984	0.0342883	-0.250654
10436561	Usp25	ubiquitin specific peptidase 25	ENSMUSG00000022867	0.417284	10.274	4.31174	0.000665205	0.0343102	-0.253859
10569733	Arhgef18	rho/rac guanine nucleotide exchange factor (GEF) 18	ENSMUSG00000004568	0.37765	10.3788	4.30847	0.000669505	0.0344389	-0.260033
10467139	Lipa	lysosomal acid lipase A	ENSMUSG00000024781	0.490886	9.43789	4.30281	0.000677019	0.0347318	-0.270728
10397551	BB287469	expressed sequence BB287469	c(\ENSMUSG00000079031\", \"ENSMUSG00000092019\")"	-0.492075	4.07083	-4.29808	0.000683361	0.0349095	-0.279663
10581538	Nqo1	NAD(P)H dehydrogenase, quinone 1	ENSMUSG00000003849	0.428523	8.94046	4.29727	0.000684463	0.0349095	-0.281206
10515257	Rad54l	RAD54 like (S. cerevisiae)	ENSMUSG00000028702	0.486655	9.20546	4.29615	0.000685971	0.0349095	-0.283314
10554445	Prc1	protein regulator of cytokinesis 1	ENSMUSG00000038943	0.371589	10.9555	4.29193	0.000691714	0.0350698	-0.291305
10564011	Snord115	Small nucleolar RNA, C/D Box 115 cluster	NA	0.796536	7.048	4.29102	0.000692951	0.0350698	-0.293016
10417273	Esd	esterase D/formylglutathione hydrolase	ENSMUSG00000021996	0.404547	10.7176	4.28861	0.000696265	0.0350698	-0.297587
10581729	Ddx19a	DEAD (Asp-Glu-Ala-Asp) box polypeptide 19a	ENSMUSG00000015023	0.405943	11.0366	4.28646	0.000699222	0.0350698	-0.301649
10420097	Tinf2	Terf1 (TRF1)-interacting nuclear factor 2	ENSMUSG00000007589	0.449946	10.018	4.28593	0.000699958	0.0350698	-0.302657
10396079	Klhdc1	kelch domain containing 1	ENSMUSG00000051890	0.382999	8.91377	4.28579	0.000700146	0.0350698	-0.302914
10414950	Gm5770	predicted gene 5770	NA	-0.373303	5.62694	-4.27531	0.000714787	0.0357094	-0.322744
10433639	Mkl2	MKL/myocardin-like 2	ENSMUSG00000009569	-0.347524	10.3073	-4.27147	0.000720227	0.0358873	-0.33001
10480258	Nsun6	NOL1/NOP2/Sun domain family member 6	ENSMUSG00000026707	0.443157	9.17415	4.26434	0.00073045	0.0362111	-0.343514
10481135	Surf1	surfeit gene 1	ENSMUSG00000015790	0.398234	11.0518	4.26429	0.000730521	0.0362111	-0.343608
10476355	Chgb	chromogranin B	ENSMUSG00000027350	-0.377776	13.613	-4.25802	0.00073962	0.0365671	-0.355467
10409265	Auh	AU RNA binding protein/enoyl-coenzyme A hydratase	ENSMUSG00000021460	0.509056	10.4808	4.25081	0.000750249	0.0369968	-0.369139
10462866	Cep55	centrosomal protein 55	ENSMUSG00000024989	0.481724	10.5892	4.24869	0.000753403	0.0369971	-0.373158
10378482	Mettl16	methyltransferase like 16	ENSMUSG00000010554	0.453611	9.1883	4.2482	0.000754133	0.0369971	-0.374086
10588731	Mst1r	macrophage stimulating 1 receptor (c-met-related tyrosine kinase)	ENSMUSG00000032584	-0.348845	8.43856	-4.24	0.000766455	0.0375052	-0.389614
10566609	Olfr706	olfactory receptor 706	ENSMUSG00000043599	-0.359434	5.89714	-4.238	0.000769492	0.0375401	-0.393404
10557535	Sez6l2	seizure related 6 homolog like 2	ENSMUSG00000030683	-0.362296	11.2978	-4.23695	0.000771103	0.0375401	-0.395408
10549760	Zfp580	zinc finger protein 580	ENSMUSG00000055633	0.508488	10.3336	4.23458	0.000774719	0.0376202	-0.39989
10521090	Tacc3	transforming, acidic coiled-coil containing protein 3	ENSMUSG00000037313	0.369676	9.87906	4.22615	0.00078776	0.0381564	-0.415883
10457640	S100a11	S100 calcium binding protein A11 (calgizzarin)	ENSMUSG00000027907	0.390024	8.86012	4.22382	0.000791404	0.0382358	-0.420304
10533345	Aldh2	aldehyde dehydrogenase 2, mitochondrial	ENSMUSG00000029455	0.444829	10.0988	4.22136	0.000795265	0.0382867	-0.424967
10389879	Wfikkn2	WAP, follistatin/kazal, immunoglobulin, kunitz and netrin domain containing 2	ENSMUSG00000044177	-0.406906	9.80034	-4.22059	0.00079647	0.0382867	-0.426418
10543802	Plxna4	plexin A4	ENSMUSG00000029765	-0.376591	11.3614	-4.21927	0.000798559	0.0382907	-0.428927
10514255	Mllt3	myeloid/lymphoid or mixed-lineage leukemia (trithorax homolog, Drosophila); translocated to, 3	ENSMUSG00000028496	0.436701	10.3911	4.20933	0.000814432	0.0388667	-0.447783
10364856	Dot1l	DOT1-like, histone H3 methyltransferase (S. cerevisiae)	ENSMUSG00000061589	0.343061	11.1968	4.20893	0.000815078	0.0388667	-0.448543
10460666	Ltbp3	latent transforming growth factor beta binding protein 3	ENSMUSG00000024940	-0.367626	10.0116	-4.20794	0.000816681	0.0388667	-0.450425
10552608	Klk1b3	kallikrein 1-related peptidase b3	ENSMUSG00000066515	-0.36889	5.03916	-4.20273	0.000825159	0.0389644	-0.460319
10578709	Wdr17	WD repeat domain 17	ENSMUSG00000039375	0.361482	7.51271	4.20161	0.000826981	0.0389644	-0.462432
10409190	Cenpp	centromere protein P	ENSMUSG00000021391	0.436781	8.58593	4.19668	0.000835099	0.0389644	-0.47179
10458293	Dnajc18	DnaJ (Hsp40) homolog, subfamily C, member 18	ENSMUSG00000024350	0.370043	9.63157	4.196	0.00083623	0.0389644	-0.473087
10438103	Ccdc116	coiled-coil domain containing 116	ENSMUSG00000022768	-0.363875	8.51935	-4.19467	0.000838444	0.0389644	-0.47562
10526564	Ufsp1	UFM1-specific peptidase 1	ENSMUSG00000051502	-0.387586	10.3787	-4.19448	0.000838759	0.0389644	-0.475979
10443690	Glp1r	glucagon-like peptide 1 receptor	ENSMUSG00000024027	-0.422831	12.5692	-4.18815	0.000849354	0.0389644	-0.488004
10409278	Nfil3	nuclear factor, interleukin 3, regulated	ENSMUSG00000056749	0.368843	10.5076	4.18408	0.000856226	0.0389644	-0.495724
10490203	Gnas	GNAS (guanine nucleotide binding protein, alpha stimulating) complex locus	ENSMUSG00000027523	-0.404221	11.4958	-4.18361	0.000857035	0.0389644	-0.496628
10399360	Rhob	ras homolog gene family, member B	ENSMUSG00000054364	0.493323	10.2163	4.17858	0.000865619	0.0389644	-0.506175
10385153	Ccdc99	coiled-coil domain containing 99	ENSMUSG00000069910	0.385199	8.01068	4.17853	0.000865715	0.0389644	-0.506281
10517731	Igsf21	immunoglobin superfamily, member 21	ENSMUSG00000040972	-0.432097	8.21708	-4.17744	0.000867582	0.0389644	-0.508345
10502071	5730508B09Rik	RIKEN cDNA 5730508B09 gene	ENSMUSG00000050549	0.346044	9.07511	4.17528	0.000871314	0.0389644	-0.512456
10527880	C030048B08Rik	RIKEN cDNA C030048B08 gene	ENSMUSG00000040302	0.390594	9.21367	4.17374	0.000873982	0.0389644	-0.515385
10563937	Snord115	Small nucleolar RNA, C/D Box 115 cluster	NA	0.772241	7.06172	4.17263	0.000875902	0.0389644	-0.517488
10563947	Snord115	Small nucleolar RNA, C/D Box 115 cluster	NA	0.772241	7.06172	4.17263	0.000875902	0.0389644	-0.517488
10563951	Snord115	Small nucleolar RNA, C/D Box 115 cluster	NA	0.772241	7.06172	4.17263	0.000875902	0.0389644	-0.517488
10563953	Snord115	Small nucleolar RNA, C/D Box 115 cluster	NA	0.772241	7.06172	4.17263	0.000875902	0.0389644	-0.517488
10563957	Snord115	Small nucleolar RNA, C/D Box 115 cluster	NA	0.772241	7.06172	4.17263	0.000875902	0.0389644	-0.517488
10563995	Snord115	Small nucleolar RNA, C/D Box 115 cluster	NA	0.772241	7.06172	4.17263	0.000875902	0.0389644	-0.517488
10563997	Snord115	Small nucleolar RNA, C/D Box 115 cluster	NA	0.772241	7.06172	4.17263	0.000875902	0.0389644	-0.517488
10563999	Snord115	Small nucleolar RNA, C/D Box 115 cluster	NA	0.772241	7.06172	4.17263	0.000875902	0.0389644	-0.517488
10564001	Snord115	Small nucleolar RNA, C/D Box 115 cluster	NA	0.772241	7.06172	4.17263	0.000875902	0.0389644	-0.517488
10564003	Snord115	Small nucleolar RNA, C/D Box 115 cluster	NA	0.772241	7.06172	4.17263	0.000875902	0.0389644	-0.517488
10564007	Snord115	Small nucleolar RNA, C/D Box 115 cluster	NA	0.772241	7.06172	4.17263	0.000875902	0.0389644	-0.517488
10564029	Snord115	Small nucleolar RNA, C/D Box 115 cluster	NA	0.772241	7.06172	4.17263	0.000875902	0.0389644	-0.517488
10564031	Snord115	Small nucleolar RNA, C/D Box 115 cluster	NA	0.772241	7.06172	4.17263	0.000875902	0.0389644	-0.517488
10564065	Gm3079	predicted gene 3079	NA	0.772241	7.06172	4.17263	0.000875902	0.0389644	-0.517488
10551347	Blvrb	biliverdin reductase B (flavin reductase (NADPH))	ENSMUSG00000040466	0.374812	11.5781	4.16947	0.000881418	0.0391185	-0.5235
10379127	Spag5	sperm associated antigen 5	ENSMUSG00000002055	0.384439	10.5199	4.16627	0.000887028	0.0391481	-0.529578
10352092	Zfp238	zinc finger protein 238	ENSMUSG00000063659	0.388565	10.3463	4.1657	0.00088803	0.0391481	-0.530659
10584941	Bace1	beta-site APP cleaving enzyme 1	ENSMUSG00000032086	-0.409647	10.3047	-4.16491	0.00088943	0.0391481	-0.532168
10416371	Lpar6	lysophosphatidic acid receptor 6	ENSMUSG00000033446	0.381039	9.51104	4.16442	0.000890289	0.0391481	-0.533093
10386548	Pabpc4	poly(A) binding protein, cytoplasmic 4	ENSMUSG00000011257	0.361072	10.8449	4.15859	0.000900644	0.0395124	-0.544169
10512574	Gba2	glucosidase beta 2	ENSMUSG00000028467	0.399316	9.3702	4.1558	0.00090565	0.0396113	-0.549478
10526754	Ap4m1	adaptor-related protein complex AP-4, mu 1	ENSMUSG00000019518	0.391803	9.88333	4.15502	0.000907051	0.0396113	-0.550958
10520734	Nrbp1	nuclear receptor binding protein 1	ENSMUSG00000029148	0.37929	12.2654	4.15217	0.000912205	0.0397335	-0.556386
10542842	Ccdc91	coiled-coil domain containing 91	ENSMUSG00000030301	0.342295	9.36352	4.15117	0.000914011	0.0397335	-0.55828
10365471	Fbxo7	F-box protein 7	ENSMUSG00000001786	0.33813	9.7982	4.14868	0.000918554	0.0397418	-0.563029
10495574	Sass6	spindle assembly 6 homolog (C. elegans)	ENSMUSG00000027959	0.418742	10.7576	4.1477	0.000920332	0.0397418	-0.564882
10375402	Adam19	a disintegrin and metallopeptidase domain 19 (meltrin beta)	ENSMUSG00000011256	-0.366127	11.3543	-4.14764	0.000920449	0.0397418	-0.565004
10427148	Zfp740	zinc finger protein 740	ENSMUSG00000046897	0.415417	9.92338	4.14284	0.000929265	0.0399307	-0.574133
10592585	Sc5d	sterol-C5-desaturase (fungal ERG3, delta-5-desaturase) homolog (S. cerevisae)	ENSMUSG00000032018	-0.342904	11.8705	-4.14265	0.000929611	0.0399307	-0.574489
10502257	Gstcd	glutathione S-transferase, C-terminal domain containing	ENSMUSG00000028018	0.357874	10.0443	4.14185	0.000931103	0.0399307	-0.576026
10544906	Ggct	gamma-glutamyl cyclotransferase	ENSMUSG00000002797	0.37538	8.23926	4.13874	0.000936863	0.0400876	-0.581932
10603896	Klhl13	kelch-like 13 (Drosophila)	ENSMUSG00000036782	-0.370832	6.98193	-4.13612	0.000941751	0.0401525	-0.586917
10424221	Wdr67	WD repeat domain 67	ENSMUSG00000022364	0.390313	12.4326	4.1334	0.000946868	0.0401525	-0.592106
10524266	Chek2	CHK2 checkpoint homolog (S. pombe)	ENSMUSG00000029521	0.482481	9.48819	4.13337	0.000946924	0.0401525	-0.592163
10373756	Pla2g3	phospholipase A2, group III	ENSMUSG00000034579	-0.358697	9.54619	-4.13296	0.000947696	0.0401525	-0.592943
10558134	Plekha1	pleckstrin homology domain containing, family A (phosphoinositide binding specific) member 1	ENSMUSG00000040268	0.347401	8.41856	4.13232	0.000948898	0.0401525	-0.594157
10401149	Plek2	pleckstrin 2	ENSMUSG00000021118	0.34947	7.36336	4.1301	0.000953091	0.0401917	-0.598379
10355916	Pax3	paired box gene 3	ENSMUSG00000004872	0.416351	9.6265	4.12925	0.000954702	0.0401917	-0.599997
10545534	Rnf26	ring finger protein 26	ENSMUSG00000053128	0.40408	10.3005	4.12849	0.000956144	0.0401917	-0.601442
10357391	Zranb3	zinc finger, RAN-binding domain containing 3	ENSMUSG00000036086	0.424781	9.29775	4.12487	0.000963051	0.0403093	-0.608336
10523802	Cdc7	cell division cycle 7 (S. cerevisiae)	ENSMUSG00000029283	0.367228	9.53485	4.12481	0.000963164	0.0403093	-0.608449
10460221	Chka	choline kinase alpha	ENSMUSG00000024843	0.416486	9.80141	4.11922	0.00097392	0.0405266	-0.619085
10566034	Folr1	folate receptor 1 (adult)	ENSMUSG00000001827	-0.400531	10.4867	-4.11835	0.000975619	0.0405266	-0.620754
10563338	Ppp1r15a	protein phosphatase 1, regulatory (inhibitor) subunit 15A	ENSMUSG00000040435	0.383509	10.2237	4.11627	0.000979663	0.0405266	-0.624715
10386543	Pabpc4	poly(A) binding protein, cytoplasmic 4	ENSMUSG00000011257	0.358493	10.8744	4.11612	0.000979948	0.0405266	-0.624994
10473224	Dusp19	dual specificity phosphatase 19	ENSMUSG00000027001	0.365373	11.061	4.11519	0.00098176	0.0405266	-0.626762
10375864	Agxt2l2	alanine-glyoxylate aminotransferase 2-like 2	ENSMUSG00000020359	-0.360085	10.463	-4.11472	0.00098269	0.0405266	-0.627669
10490794	Pkia	protein kinase inhibitor, alpha	ENSMUSG00000027499	0.442256	9.68284	4.11438	0.000983354	0.0405266	-0.628316
10493103	Isg20l2	interferon stimulated exonuclease gene 20-like 2	ENSMUSG00000048039	0.397215	9.87936	4.11336	0.000985347	0.0405266	-0.630255
10591139	Naalad2	N-acetylated alpha-linked acidic dipeptidase 2	ENSMUSG00000043943	0.401365	7.11449	4.10397	0.00100393	0.0412022	-0.648147
10411927	Cwc27	CWC27 spliceosome-associated protein homolog (S. cerevisiae)	ENSMUSG00000021715	0.378551	10.0997	4.10092	0.00101003	0.041298	-0.653949
10415413	Nynrin	NYN domain and retroviral integrase containing	ENSMUSG00000075592	-0.34861	9.65216	-4.10036	0.00101115	0.041298	-0.655011
10591116	Fat3	FAT tumor suppressor homolog 3 (Drosophila)	ENSMUSG00000074505	-0.361075	7.50538	-4.09957	0.00101276	0.041298	-0.65653
10357579	Mapkapk2	MAP kinase-activated protein kinase 2	ENSMUSG00000016528	0.453155	10.401	4.09607	0.00101984	0.0414124	-0.663201
10514398	5830433M19Rik	RIKEN cDNA 5830433M19 gene	ENSMUSG00000028578	0.415949	8.64036	4.09603	0.0010199	0.0414124	-0.663263
10492402	Kcnab1	potassium voltage-gated channel, shaker-related subfamily, beta member 1	ENSMUSG00000027827	0.39126	10.833	4.09177	0.00102859	0.0415526	-0.671383
10370334	Lrrc3	leucine rich repeat containing 3	ENSMUSG00000051652	-0.369995	10.3405	-4.09157	0.00102901	0.0415526	-0.671775
10507851	Pabpc4	poly(A) binding protein, cytoplasmic 4	ENSMUSG00000011257	0.348729	10.8437	4.09095	0.00103029	0.0415526	-0.672961
10414093	Glud1	glutamate dehydrogenase 1	c(\ENSMUSG00000091316\", \"ENSMUSG00000021794\")"	0.358891	11.026	4.09008	0.00103206	0.0415526	-0.674613
10588007	Tfdp2	transcription factor Dp 2	ENSMUSG00000032411	0.40276	10.2184	4.08759	0.00103719	0.0415607	-0.679358
10574378	Gins3	GINS complex subunit 3 (Psf3 homolog)	ENSMUSG00000031669	0.360776	9.74956	4.08738	0.00103762	0.0415607	-0.679755
10457359	Mpp7	membrane protein, palmitoylated 7 (MAGUK p55 subfamily member 7)	ENSMUSG00000057440	0.463609	8.87101	4.08681	0.0010388	0.0415607	-0.680841
10425370	Cacna1i	calcium channel, voltage-dependent, alpha 1I subunit	ENSMUSG00000022416	-0.341894	8.6389	-4.07742	0.00105842	0.0421756	-0.698753
10591129	Fat3	FAT tumor suppressor homolog 3 (Drosophila)	ENSMUSG00000074505	-0.374899	8.27083	-4.07704	0.00105921	0.0421756	-0.699467
10583242	Sesn3	sestrin 3	ENSMUSG00000032009	0.395456	10.3697	4.07613	0.00106114	0.0421756	-0.701212
10554969	Odz4	odd Oz/ten-m homolog 4 (Drosophila)	ENSMUSG00000048078	-0.345752	9.70822	-4.07422	0.00106518	0.0421756	-0.70485
10423293	Myo10	myosin X	ENSMUSG00000022272	0.358542	9.38987	4.07372	0.00106623	0.0421756	-0.705799
10427199	Pfdn5	prefoldin 5	ENSMUSG00000001289	0.43045	11.0196	4.07316	0.00106743	0.0421756	-0.706872
10402648	Brp44l	brain protein 44-like	ENSMUSG00000023861	-0.375837	12.3829	-4.06694	0.00108074	0.0426133	-0.718739
10360848	Mosc2	MOCO sulphurase C-terminal domain containing 2	ENSMUSG00000073481	0.359574	8.76981	4.06508	0.00108475	0.0426807	-0.722284
10350646	Edem3	ER degradation enhancer, mannosidase alpha-like 3	ENSMUSG00000043019	-0.350877	10.8205	-4.06408	0.00108692	0.0426807	-0.724199
10569017	Ifitm3	interferon induced transmembrane protein 3	ENSMUSG00000025492	0.436047	11.0817	4.0614	0.00109273	0.0427364	-0.729305
10578493	Tlr3	toll-like receptor 3	ENSMUSG00000031639	0.418243	6.85497	4.06136	0.00109282	0.0427364	-0.72938
10516246	Cdca8	cell division cycle associated 8	ENSMUSG00000028873	0.362423	10.8137	4.0551	0.00110653	0.0430755	-0.741319
10367076	Prim1	DNA primase, p49 subunit	ENSMUSG00000025395	0.430877	11.1457	4.0547	0.00110742	0.0430755	-0.742084
10538590	Herc6	hect domain and RLD 6	ENSMUSG00000029798	0.386827	8.65229	4.05432	0.00110826	0.0430755	-0.742812
10361375	Fbxo5	F-box protein 5	ENSMUSG00000019773	0.425781	11.2305	4.05146	0.00111459	0.0432334	-0.748263
10404063	Hist1h2ab	histone cluster 1, H2ab	c(\ENSMUSG00000061615\", \"ENSMUSG00000069270\", \"ENSMUSG00000071478\", \"ENSMUSG00000069272\", \"ENSMUSG00000069301\", \"ENSMUSG00000069304\", \"ENSMUSG00000060262\", \"ENSMUSG00000069309\", \"ENSMUSG00000071516\")"	0.759788	9.09533	4.04433	0.00113056	0.0437638	-0.761879
10591853	Tbx20	T-box 20	ENSMUSG00000031965	-0.33456	10.5606	-4.04267	0.0011343	0.0438199	-0.765047
10470050	Abca2	ATP-binding cassette, sub-family A (ABC1), member 2	ENSMUSG00000026944	-0.350085	10.5515	-4.03786	0.00114525	0.0441533	-0.774238
10459071	2010002N04Rik	RIKEN cDNA 2010002N04 gene	ENSMUSG00000038059	0.350174	10.2142	4.03586	0.00114982	0.0442404	-0.778056
10351179	2810422O20Rik	RIKEN cDNA 2810422O20 gene	ENSMUSG00000041396	0.517574	8.35344	4.03451	0.00115293	0.0442705	-0.780635
10378436	Olfr59	olfactory receptor 59	ENSMUSG00000070374	-0.408673	6.0075	-4.03297	0.00115647	0.0443176	-0.783576
10477187	Tpx2	TPX2, microtubule-associated protein homolog (Xenopus laevis)	ENSMUSG00000027469	0.350342	11.2098	4.03013	0.00116304	0.044409	-0.788995
10424349	Sqle	squalene epoxidase	ENSMUSG00000022351	-0.329566	12.5423	-4.02879	0.00116616	0.044409	-0.79156
10506274	Dnajc6	DnaJ (Hsp40) homolog, subfamily C, member 6	ENSMUSG00000028528	0.355313	8.89562	4.028	0.001168	0.044409	-0.793069
10446441	Ddx11	DEAD/H (Asp-Glu-Ala-Asp/His) box polypeptide 11 (CHL1-like helicase homolog, S. cerevisiae)	ENSMUSG00000035842	0.336855	9.61344	4.02792	0.00116817	0.044409	-0.793207
10408600	Serpinb6a	serine (or cysteine) peptidase inhibitor, clade B, member 6a	ENSMUSG00000060147	0.359918	9.84943	4.02135	0.00118358	0.0448993	-0.805755
10536746	Arf5	ADP-ribosylation factor 5	ENSMUSG00000020440	0.352224	10.8777	4.02	0.00118679	0.0448993	-0.808346
10556790	2610020H08Rik	RIKEN cDNA 2610020H08 gene	ENSMUSG00000030924	0.372479	8.16296	4.01944	0.00118812	0.0448993	-0.80942
10571142	Gpr124	G protein-coupled receptor 124	ENSMUSG00000031486	0.380569	9.22772	4.01701	0.00119389	0.045028	-0.814053
10437195	Igsf5	immunoglobulin superfamily, member 5	ENSMUSG00000000159	-0.335099	8.39232	-4.01495	0.0011988	0.0451242	-0.817985
10524889	Ksr2	kinase suppressor of ras 2	ENSMUSG00000061578	-0.329006	8.60864	-4.01028	0.00121003	0.0453272	-0.826906
10405263	4732471D19Rik	RIKEN cDNA 4732471D19 gene	ENSMUSG00000043183	0.363898	10.5813	4.0098	0.0012112	0.0453272	-0.827833
10404675	Snrnp48	small nuclear ribonucleoprotein 48 (U11/U12)	ENSMUSG00000021431	0.44563	9.27661	4.00975	0.00121132	0.0453272	-0.827927
10606914	Esx1	extraembryonic, spermatogenesis, homeobox 1	ENSMUSG00000023443	0.345959	8.78868	4.00617	0.00122001	0.0454613	-0.83477
10581800	Rfwd3	ring finger and WD repeat domain 3	ENSMUSG00000033596	0.348623	11.5144	4.00564	0.0012213	0.0454613	-0.835776
10357954	Ppp1r12b	protein phosphatase 1, regulatory (inhibitor) subunit 12B	ENSMUSG00000073557	0.362878	8.51966	4.00533	0.00122205	0.0454613	-0.836368
10461028	Trpt1	tRNA phosphotransferase 1	ENSMUSG00000047656	0.362691	8.76535	4.00343	0.00122671	0.0455456	-0.840005
10503315	Rad54b	RAD54 homolog B (S. cerevisiae)	ENSMUSG00000078773	0.428606	9.26757	3.99751	0.00124129	0.0459977	-0.851318
10350024	Klhl12	kelch-like 12 (Drosophila)	ENSMUSG00000026455	0.365074	8.93915	3.99623	0.00124448	0.0460239	-0.853774
10541091	Gemin6	gem (nuclear organelle) associated protein 6	ENSMUSG00000055760	0.475417	8.42298	3.99504	0.00124743	0.0460239	-0.856035
10406865	Mrps27	mitochondrial ribosomal protein S27	ENSMUSG00000041632	0.400615	10.3016	3.99387	0.00125035	0.0460239	-0.858278
10395893	Sip1	survival of motor neuron protein interacting protein 1	ENSMUSG00000060121	0.418386	9.63849	3.99335	0.00125165	0.0460239	-0.859268
10359826	Uqcr11	ubiquinol-cytochrome c reductase, complex III subunit XI	ENSMUSG00000020163	-0.390437	10.3274	-3.98946	0.00126141	0.046214	-0.866703
10443817	Pknox1	Pbx/knotted 1 homeobox	ENSMUSG00000006705	0.372612	9.01821	3.98936	0.00126166	0.046214	-0.866892
10520782	Zfp512	zinc finger protein 512	ENSMUSG00000062761	0.384663	10.0351	3.98359	0.00127629	0.0466603	-0.877924
10560719	2210010C17Rik	RIKEN cDNA 2210010C17 gene	ENSMUSG00000040498	-0.368055	10.4102	-3.97738	0.00129224	0.0471533	-0.889812
10499160	Cd1d1	CD1d1 antigen	ENSMUSG00000028076	0.39095	7.97202	3.97447	0.00129978	0.0473377	-0.895374
10506680	Tmem48	transmembrane protein 48	ENSMUSG00000028614	0.437272	10.455	3.97245	0.00130502	0.0474383	-0.899229
10384824	Prorsd1	prolyl-tRNA synthetase domain containing 1	ENSMUSG00000032673	0.34886	9.32517	3.9665	0.00132066	0.0478835	-0.910628
10474381	Kif18a	kinesin family member 18A	ENSMUSG00000027115	0.357483	10.3314	3.96521	0.00132408	0.0478835	-0.913096
10421917	Pabpc4	poly(A) binding protein, cytoplasmic 4	ENSMUSG00000011257	0.335099	11.1686	3.96493	0.0013248	0.0478835	-0.91362
10394488	Matn3	matrilin 3	ENSMUSG00000020583	0.370878	9.08858	3.96311	0.00132965	0.0479113	-0.917116
10370833	Uqcr11	ubiquinol-cytochrome c reductase, complex III subunit XI	ENSMUSG00000020163	-0.442668	11.2893	-3.96275	0.00133059	0.0479113	-0.917791
10411454	Sec61b	Sec61 beta subunit	ENSMUSG00000053317	-0.444027	10.3333	-3.96125	0.00133461	0.0479273	-0.920675
10362418	Trdn	triadin	ENSMUSG00000019787	0.43755	4.76288	3.9607	0.00133606	0.0479273	-0.921716
10394532	Ube2f	ubiquitin-conjugating enzyme E2F (putative)	ENSMUSG00000034343	0.347907	10.7234	3.95932	0.00133974	0.0479693	-0.924351
10536429	Tmem106b	transmembrane protein 106B	ENSMUSG00000029571	-0.360938	11.5155	-3.9583	0.00134249	0.0479776	-0.926308
10593767	Chrnb4	cholinergic receptor, nicotinic, beta polypeptide 4	ENSMUSG00000035200	-0.346919	8.08094	-3.95716	0.00134556	0.0479942	-0.928495
10412298	Itga1	integrin alpha 1	ENSMUSG00000042284	-0.363807	11.1523	-3.95626	0.00134798	0.0479942	-0.930216
10467013	Prkg1	protein kinase, cGMP-dependent, type I	ENSMUSG00000052920	0.433722	9.21412	3.95392	0.00135432	0.0481044	-0.9347
10517791	Padi4	peptidyl arginine deiminase, type IV	ENSMUSG00000025330	-0.384919	7.3233	-3.95325	0.00135612	0.0481044	-0.935973
10564211	Snrpn	small nuclear ribonucleoprotein N	ENSMUSG00000000948	0.346844	10.8614	3.94658	0.00137435	0.0486607	-0.94875
10568131	2900092E17Rik	RIKEN cDNA 2900092E17 gene	ENSMUSG00000030680	0.364681	11.9977	3.94312	0.00138387	0.0489071	-0.955355
10362097	H60b	histocompatibility 60b	ENSMUSG00000075297	-0.334032	7.89286	-3.94174	0.00138773	0.0489526	-0.958014
10550098	Wdr12	WD repeat domain 12	ENSMUSG00000026019	0.334813	10.8337	3.93999	0.00139259	0.0490336	-0.961362
10474064	Trp53i11	transformation related protein 53 inducible protein 11	ENSMUSG00000068735	-0.352136	13.2782	-3.93883	0.00139583	0.049057	-0.963582
10532630	Adrbk2	adrenergic receptor kinase, beta 2	ENSMUSG00000042249	-0.360068	10.5767	-3.93692	0.00140117	0.0491543	-0.967237
10522192	Nsun7	NOL1/NOP2/Sun domain family, member 7	ENSMUSG00000029206	0.494441	6.96499	3.93288	0.00141253	0.0494618	-0.97496
10485198	Tspan18	tetraspanin 18	ENSMUSG00000027217	-0.402758	12.213	-3.92897	0.00142365	0.0497599	-0.982461
10427816	Pdzd2	PDZ domain containing 2	ENSMUSG00000022197	-0.366738	9.27645	-3.92395	0.00143803	0.0501217	-0.992077
10419966	Zfhx2	zinc finger homeobox 2	ENSMUSG00000040721	-0.352781	10.2278	-3.92352	0.00143925	0.0501217	-0.992887
10514240	Slc24a2	solute carrier family 24 (sodium/potassium/calcium exchanger), member 2	ENSMUSG00000037996	-0.341426	10.1868	-3.91816	0.00145478	0.0505702	-1.00315
10381744	Arf2	ADP-ribosylation factor 2	ENSMUSG00000062421	0.341135	10.8928	3.9157	0.00146199	0.0506393	-1.00788
10489051	5730471H19Rik	RIKEN cDNA 5730471H19 gene	NA	0.369767	8.83562	3.91486	0.00146443	0.0506393	-1.00948
10575120	Sntb2	syntrophin, basic 2	ENSMUSG00000041308	0.3296	10.0662	3.91476	0.00146473	0.0506393	-1.00967
10474769	Bub1b	budding uninhibited by benzimidazoles 1 homolog, beta (S. cerevisiae)	ENSMUSG00000040084	0.333678	11.0806	3.91276	0.00147061	0.0507506	-1.0135
10515974	Nfyc	nuclear transcription factor-Y gamma	ENSMUSG00000032897	0.394783	8.05761	3.90797	0.00148478	0.0511416	-1.02267
10349932	Etnk2	ethanolamine kinase 2	ENSMUSG00000070644	-0.354422	7.62919	-3.90713	0.0014873	0.0511416	-1.02429
10576883	Shcbp1	Shc SH2-domain binding protein 1	ENSMUSG00000022322	0.37585	10.7261	3.90523	0.00149296	0.0512439	-1.02792
10405785	0610007P08Rik	RIKEN cDNA 0610007P08 gene	ENSMUSG00000021470	0.335405	9.43374	3.90315	0.00149921	0.0513062	-1.03192
10428012	Ropn1l	ropporin 1-like	ENSMUSG00000022236	-0.389239	9.40677	-3.90104	0.00150555	0.0513062	-1.03596
10531286	Vdac2	voltage-dependent anion channel 2	ENSMUSG00000021771	0.351726	12.7478	3.90044	0.00150736	0.0513062	-1.0371
10564013	Snord115	Small nucleolar RNA, C/D Box 115 cluster	NA	0.737738	7.08113	3.90016	0.00150821	0.0513062	-1.03765
10564017	Snord115	Small nucleolar RNA, C/D Box 115 cluster	NA	0.737738	7.08113	3.90016	0.00150821	0.0513062	-1.03765
10391755	Ccdc43	coiled-coil domain containing 43	ENSMUSG00000020925	0.335918	9.94581	3.89839	0.00151356	0.0513439	-1.04103
10568461	Rfwd3	ring finger and WD repeat domain 3	ENSMUSG00000033596	0.342006	11.5125	3.89801	0.0015147	0.0513439	-1.04175
10585984	Myo9a	myosin IXa	ENSMUSG00000039585	-0.337868	8.24136	-3.89456	0.00152522	0.0514557	-1.04837
10349081	Phlpp1	PH domain and leucine rich repeat protein phosphatase 1	ENSMUSG00000044340	0.325232	9.71305	3.8939	0.00152726	0.0514557	-1.04965
10442270	Zfp946	zinc finger protein 946	ENSMUSG00000071266	0.450199	11.0965	3.89347	0.00152857	0.0514557	-1.05047
10590648	Top2a	topoisomerase (DNA) II alpha	ENSMUSG00000020914	0.350677	6.59969	3.8934	0.00152879	0.0514557	-1.0506
10347583	Des	desmin	ENSMUSG00000026208	0.390526	8.63177	3.88917	0.00154181	0.0518026	-1.05871
10479981	Gata3	GATA binding protein 3	ENSMUSG00000015619	-0.325918	10.66	-3.88612	0.00155125	0.0519861	-1.06455
10426889	Sec61b	Sec61 beta subunit	ENSMUSG00000053317	-0.422262	8.86463	-3.88565	0.00155272	0.0519861	-1.06545
10397882	Chga	chromogranin A	ENSMUSG00000021194	-0.349951	13.2966	-3.88389	0.00155821	0.0520785	-1.06883
10452709	Ndc80	NDC80 homolog, kinetochore complex component (S. cerevisiae)	ENSMUSG00000024056	0.423904	9.90203	3.88238	0.00156291	0.0521444	-1.07171
10490872	Lrrcc1	leucine rich repeat and coiled-coil domain containing 1	ENSMUSG00000027550	0.363782	9.03087	3.8804	0.00156914	0.0522607	-1.07551
10412100	Map3k1	mitogen-activated protein kinase kinase kinase 1	ENSMUSG00000021754	0.35064	9.54929	3.87169	0.00159679	0.053089	-1.09221
10500204	Ecm1	extracellular matrix protein 1	ENSMUSG00000028108	-0.381951	9.12263	-3.86922	0.00160472	0.0531395	-1.09695
10402650	Cinp	cyclin-dependent kinase 2 interacting protein	ENSMUSG00000021276	0.328375	10.397	3.86912	0.00160502	0.0531395	-1.09713
10508996	2610002D18Rik	RIKEN cDNA 2610002D18 gene	ENSMUSG00000078521	0.366245	10.4365	3.86862	0.00160666	0.0531395	-1.0981
10570432	Snora3	small nucleolar RNA, H/ACA box 3	NA	-0.376769	10.9503	-3.86564	0.00161627	0.053365	-1.10381
10515983	Dem1	defects in morphology 1 homolog (S. cerevisiae)	ENSMUSG00000028629	0.332242	9.23935	3.86137	0.00163018	0.0536691	-1.112
10395142	Sh3yl1	Sh3 domain YSC-like 1	ENSMUSG00000020669	0.521966	7.63636	3.86109	0.00163111	0.0536691	-1.11254
10565609	Thrsp	thyroid hormone responsive SPOT14 homolog (Rattus)	ENSMUSG00000035686	-0.333269	7.92878	-3.85727	0.00164364	0.0538677	-1.11986
10499854	S100a1	S100 calcium binding protein A1	ENSMUSG00000044080	-0.334949	10.3537	-3.85714	0.00164407	0.0538677	-1.12011
10504831	Sec61b	Sec61 beta subunit	ENSMUSG00000053317	-0.419569	9.70405	-3.85667	0.00164561	0.0538677	-1.121
10509122	Cnr2	cannabinoid receptor 2 (macrophage)	ENSMUSG00000062585	-0.316359	6.67002	-3.85132	0.00166338	0.054356	-1.13127
10510413	Gm572	predicted gene 572	ENSMUSG00000070577	-0.336621	8.23311	-3.84891	0.00167144	0.0544598	-1.13589
10602166	Nxt2	nuclear transport factor 2-like export factor 2	ENSMUSG00000042271	0.368544	10.5142	3.84841	0.00167314	0.0544598	-1.13686
10429220	Fam135b	family with sequence similarity 135, member B	ENSMUSG00000036800	-0.371837	7.68583	-3.84701	0.00167784	0.0544598	-1.13954
10499560	Adam15	a disintegrin and metallopeptidase domain 15 (metargidin)	ENSMUSG00000028041	-0.344617	11.5188	-3.84697	0.00167797	0.0544598	-1.13962
10416887	Slain1	SLAIN motif family, member 1	ENSMUSG00000055717	0.332755	10.209	3.84409	0.00168769	0.0546529	-1.14514
10511180	Mxra8	matrix-remodelling associated 8	ENSMUSG00000029070	-0.35756	11.1541	-3.84351	0.00168965	0.0546529	-1.14624
10502686	Dnase2b	deoxyribonuclease II beta	ENSMUSG00000028185	-0.31365	9.16281	-3.84105	0.00169801	0.0548307	-1.15097
10512739	Xpa	xeroderma pigmentosum, complementation group A	ENSMUSG00000028329	0.402787	9.3305	3.83302	0.00172561	0.0555775	-1.16637
10550365	Prkd2	protein kinase D2	ENSMUSG00000041187	0.356206	8.71909	3.83221	0.00172843	0.0555775	-1.16793
10362428	Trdn	triadin	ENSMUSG00000019787	0.549305	6.93631	3.83106	0.00173242	0.0555775	-1.17014
10474814	Disp2	dispatched homolog 2 (Drosophila)	ENSMUSG00000040035	-0.359022	12.4998	-3.83095	0.00173279	0.0555775	-1.17034
10480057	Rbm17	RNA binding motif protein 17	ENSMUSG00000037197	0.449808	10.8465	3.8259	0.00175048	0.0560506	-1.18005
10593233	Htr3a	5-hydroxytryptamine (serotonin) receptor 3A	ENSMUSG00000032269	-0.506992	11.441	-3.82496	0.00175377	0.0560618	-1.18184
10497001	Cryz	crystallin, zeta	ENSMUSG00000028199	0.35881	10.4416	3.82407	0.00175692	0.0560687	-1.18356
10517616	Vwa5b1	von Willebrand factor A domain containing 5B1	ENSMUSG00000028753	-0.315743	11.0423	-3.82123	0.00176696	0.0562429	-1.189
10604687	Mmgt1	membrane magnesium transporter 1	ENSMUSG00000061273	-0.408699	11.2498	-3.82086	0.00176827	0.0562429	-1.18971
10521759	Slit2	slit homolog 2 (Drosophila)	ENSMUSG00000031558	-0.354882	12.2922	-3.81979	0.00177209	0.0562704	-1.19177
10399178	Cdca7l	cell division cycle associated 7 like	ENSMUSG00000021175	0.353822	10.1284	3.81786	0.00177896	0.0563413	-1.19547
10584901	Dscaml1	Down syndrome cell adhesion molecule-like 1	ENSMUSG00000032087	-0.325323	9.92423	-3.81751	0.00178022	0.0563413	-1.19615
10579165	Ncan	neurocan	ENSMUSG00000002341	-0.329022	10.269	-3.81662	0.00178341	0.0563486	-1.19785
10542040	Parp11	poly (ADP-ribose) polymerase family, member 11	ENSMUSG00000037997	0.401295	8.06978	3.8148	0.00178992	0.0564609	-1.20134
10380712	Prr15l	proline rich 15-like	ENSMUSG00000047040	-0.334016	7.71601	-3.81322	0.0017956	0.0565221	-1.20436
10578916	Sc4mol	sterol-C4-methyl oxidase-like	ENSMUSG00000031604	-0.355168	13.1419	-3.81262	0.00179778	0.0565221	-1.20553
10487040	Fbn1	fibrillin 1	ENSMUSG00000027204	-0.407958	9.32059	-3.81121	0.00180288	0.056589	-1.20823
10418275	Ccdc66	coiled-coil domain containing 66	ENSMUSG00000046753	0.370135	9.39782	3.80843	0.00181296	0.056812	-1.21356
10502934	Rabggtb	RAB geranylgeranyl transferase, b subunit	ENSMUSG00000038975	0.348521	11.0298	3.80442	0.00182765	0.0571784	-1.22127
10487340	Ncaph	non-SMC condensin I complex, subunit H	ENSMUSG00000034906	0.335498	12.0229	3.80229	0.00183548	0.0573296	-1.22535
10500960	Ddx20	DEAD (Asp-Glu-Ala-Asp) box polypeptide 20	ENSMUSG00000027905	0.348265	9.82175	3.79931	0.00184652	0.0575799	-1.23108
10512489	E130306D19Rik	RIKEN cDNA E130306D19 gene	ENSMUSG00000051517	0.362312	9.26444	3.79653	0.00185686	0.0577882	-1.23642
10564646	Sv2b	synaptic vesicle glycoprotein 2 b	ENSMUSG00000053025	-0.381655	7.58041	-3.79589	0.00185925	0.0577882	-1.23765
10579550	Unc13a	unc-13 homolog A (C. elegans)	ENSMUSG00000034799	-0.364507	9.63156	-3.7944	0.00186483	0.0578674	-1.24051
10548565	Magohb	mago-nashi homolog B (Drosophila)	ENSMUSG00000030188	0.396672	8.022	3.79265	0.0018714	0.0579769	-1.24386
10514275	Ptplad2	protein tyrosine phosphatase-like A domain containing 2	ENSMUSG00000028497	-0.330714	9.02385	-3.79129	0.0018765	0.0580407	-1.24647
10461152	Snhg1	small nucleolar RNA host gene (non-protein coding) 1	NA	0.390739	8.77105	3.78989	0.00188178	0.0581097	-1.24915
10480347	Pip4k2a	phosphatidylinositol-5-phosphate 4-kinase, type II, alpha	ENSMUSG00000026737	0.315836	11.1761	3.78729	0.00189166	0.0583207	-1.25415
10442258	Zfp943	zinc finger prtoein 943	ENSMUSG00000053347	0.394453	8.24871	3.78611	0.00189613	0.058326	-1.25641
10346678	Carf	calcium response factor	ENSMUSG00000026017	0.393256	9.02519	3.78564	0.00189795	0.058326	-1.25732
10379889	Appbp2	amyloid beta precursor protein (cytoplasmic tail) binding protein 2	ENSMUSG00000018481	0.334541	7.79976	3.78465	0.00190173	0.0583484	-1.25923
10556206	Snora3	small nucleolar RNA, H/ACA box 3	NA	-0.36579	10.9262	-3.78151	0.00191374	0.0586225	-1.26524
10372583	Rab3ip	RAB3A interacting protein	ENSMUSG00000064181	0.326758	11.2695	3.77761	0.00192883	0.0589494	-1.27274
10508608	Pef1	penta-EF hand domain containing 1	ENSMUSG00000028779	0.357124	10.2693	3.77669	0.0019324	0.0589494	-1.2745
10511368	Impad1	inositol monophosphatase domain containing 1	ENSMUSG00000066324	-0.382519	11.3936	-3.77519	0.00193824	0.0589494	-1.27739
10531428	Nup54	nucleoporin 54	ENSMUSG00000034826	0.358155	11.5784	3.77506	0.00193874	0.0589494	-1.27763
10389395	Brip1	BRCA1 interacting protein C-terminal helicase 1	ENSMUSG00000034329	0.396683	9.66609	3.77389	0.00194332	0.0589494	-1.27989
10368508	Cenpw	centromere protein W	ENSMUSG00000075266	0.440345	8.63423	3.77343	0.00194511	0.0589494	-1.28077
10413222	Ppif	peptidylprolyl isomerase F (cyclophilin F)	ENSMUSG00000021868	0.406207	11.1407	3.77257	0.00194847	0.0589494	-1.28241
10603087	Pir	pirin	ENSMUSG00000031379	0.348515	11.9186	3.7724	0.00194912	0.0589494	-1.28273
10476725	Gm561	predicted gene 561	ENSMUSG00000074754	0.405779	8.35215	3.77025	0.00195756	0.059111	-1.28686
10415293	Rnf31	ring finger protein 31	ENSMUSG00000047098	0.334877	10.4059	3.76855	0.00196428	0.0592202	-1.29013
10445022	H2-M10.5	histocompatibility 2, M region locus 10.5	ENSMUSG00000037246	-0.342003	5.90126	-3.76731	0.00196919	0.0592498	-1.29252
10379998	Trim37	tripartite motif-containing 37	ENSMUSG00000018548	0.324364	11.2195	3.76673	0.00197147	0.0592498	-1.29362
10558535	Gpr123	G protein-coupled receptor 123	ENSMUSG00000025475	-0.334993	9.8426	-3.76387	0.00198285	0.0594094	-1.29911
10529156	Ift172	intraflagellar transport 172 homolog (Chlamydomonas)	ENSMUSG00000038564	0.323885	9.20782	3.76296	0.00198651	0.0594094	-1.30088
10373902	Gatsl3	GATS protein-like 3	ENSMUSG00000020424	0.362694	8.74291	3.76278	0.00198722	0.0594094	-1.30122
10393453	Dnahc17	dynein, axonemal, heavy chain 17	ENSMUSG00000033987	-0.333905	7.94711	-3.76227	0.00198924	0.0594094	-1.30219
10583834	Anln	anillin, actin binding protein	ENSMUSG00000036777	0.322059	8.44538	3.76021	0.00199752	0.0595635	-1.30616
10385118	Dock2	dedicator of cyto-kinesis 2	ENSMUSG00000020143	-0.346058	10.403	-3.75838	0.00200488	0.0596897	-1.30967
10426782	Accn2	amiloride-sensitive cation channel 2, neuronal	ENSMUSG00000023017	-0.34147	10.9766	-3.75627	0.0020134	0.0598499	-1.31372
10523001	Mobkl1a	MOB1, Mps One Binder kinase activator-like 1A (yeast)	ENSMUSG00000006262	-0.36492	10.76	-3.7546	0.00202018	0.0599581	-1.31693
10428955	Gsdmc2	gasdermin C2	ENSMUSG00000056293	-0.32886	6.3733	-3.75117	0.00203414	0.0602788	-1.3235
10432601	Tcfcp2	transcription factor CP2	ENSMUSG00000009733	0.314382	9.74673	3.74994	0.0020392	0.0602994	-1.32588
10470322	Surf2	surfeit gene 2	ENSMUSG00000014873	0.36622	11.0229	3.7491	0.00204267	0.0602994	-1.3275
10366796	Mettl1	methyltransferase like 1	ENSMUSG00000006732	0.417211	10.8727	3.74829	0.00204596	0.0602994	-1.32904
10365290	Chst11	carbohydrate sulfotransferase 11	ENSMUSG00000034612	-0.321941	11.6017	-3.74719	0.00205051	0.0602994	-1.33115
10564222	A230006K03Rik	RIKEN cDNA A230006K03 gene	ENSMUSG00000078690	-0.355235	7.37422	-3.74716	0.00205063	0.0602994	-1.33121
10604735	Rbmx	RNA binding motif protein, X chromosome	ENSMUSG00000031134	0.335062	9.79963	3.74501	0.00205954	0.060468	-1.33535
10580056	Lphn1	latrophilin 1	ENSMUSG00000013033	-0.342142	9.82528	-3.74295	0.00206809	0.0606258	-1.33931
10570634	4930467E23Rik	RIKEN cDNA 4930467E23 gene	ENSMUSG00000074456	-0.338781	5.81673	-3.73871	0.00208581	0.0609789	-1.34745
10605181	Renbp	renin binding protein	ENSMUSG00000031387	0.477142	10.4704	3.73854	0.00208652	0.0609789	-1.34778
10582403	Galns	galactosamine (N-acetyl)-6-sulfate sulfatase	ENSMUSG00000015027	-0.364713	11.3185	-3.73747	0.00209101	0.0610166	-1.34983
10357833	Atp2b4	ATPase, Ca++ transporting, plasma membrane 4	ENSMUSG00000026463	-0.354499	9.61863	-3.73082	0.00211917	0.061744	-1.3626
10530059	Sel1l3	sel-1 suppressor of lin-12-like 3 (C. elegans)	ENSMUSG00000029189	-0.306867	11.7143	-3.72478	0.00214509	0.0624038	-1.3742
10406953	Trim23	tripartite motif-containing 23	ENSMUSG00000021712	0.409525	10.6901	3.72203	0.00215702	0.0626248	-1.3795
10359890	Nuf2	NUF2, NDC80 kinetochore complex component, homolog (S. cerevisiae)	ENSMUSG00000026683	0.351866	10.7789	3.72151	0.00215925	0.0626248	-1.38048
10595013	Tmod2	tropomodulin 2	ENSMUSG00000032186	-0.318881	11.0752	-3.72016	0.00216514	0.0626622	-1.38308
10511803	2610029I01Rik	RIKEN cDNA 2610029I01 gene	ENSMUSG00000028251	0.318956	9.64512	3.71971	0.0021671	0.0626622	-1.38395
10492757	Plrg1	pleiotropic regulator 1, PRL1 homolog (Arabidopsis)	ENSMUSG00000027998	0.345126	11.6442	3.71513	0.00218719	0.0631474	-1.39275
10419594	Rnase13	ribonuclease, RNase A family, 13 (non-active)	ENSMUSG00000068392	-0.360885	6.20198	-3.71331	0.00219521	0.0632043	-1.39624
10493094	Mrpl24	mitochondrial ribosomal protein L24	ENSMUSG00000019710	0.343048	11.0913	3.71254	0.00219861	0.0632043	-1.39772
10575706	Wwox	WW domain-containing oxidoreductase	ENSMUSG00000004637	0.344045	9.88085	3.7121	0.00220055	0.0632043	-1.39857
10600235	Abcd1	ATP-binding cassette, sub-family D (ALD), member 1	ENSMUSG00000031378	-0.333871	9.05553	-3.71066	0.00220694	0.0632043	-1.40133
10432032	Vdr	vitamin D receptor	ENSMUSG00000022479	-0.314503	9.79849	-3.71024	0.00220884	0.0632043	-1.40215
10600180	Atp2b3	ATPase, Ca++ transporting, plasma membrane 3	ENSMUSG00000031376	-0.312637	9.59262	-3.70948	0.00221222	0.0632043	-1.40361
10468059	Fbxw4	F-box and WD-40 domain protein 4	ENSMUSG00000040913	0.401849	9.3498	3.70909	0.00221394	0.0632043	-1.40436
10542662	Abcc9	ATP-binding cassette, sub-family C (CFTR/MRP), member 9	ENSMUSG00000030249	-0.325945	6.78659	-3.70773	0.00222001	0.0632043	-1.40697
10550906	Plaur	plasminogen activator, urokinase receptor	ENSMUSG00000046223	-0.447295	10.7446	-3.70699	0.0022233	0.0632043	-1.40838
10563570	Tph1	tryptophan hydroxylase 1	ENSMUSG00000040046	0.332451	8.73254	3.70676	0.00222433	0.0632043	-1.40882
10479902	Dhtkd1	dehydrogenase E1 and transketolase domain containing 1	ENSMUSG00000025815	0.326982	9.42287	3.70643	0.00222585	0.0632043	-1.40947
10607467	Sat1	spermidine/spermine N1-acetyl transferase 1	ENSMUSG00000025283	0.322249	11.1859	3.70574	0.00222891	0.0632043	-1.41078
10467599	Slit1	slit homolog 1 (Drosophila)	ENSMUSG00000025020	-0.336287	9.64097	-3.70461	0.00223399	0.0632544	-1.41296
10473367	Slc43a1	solute carrier family 43, member 1	ENSMUSG00000027075	0.338686	7.68426	3.70302	0.00224118	0.063364	-1.41602
10506170	Efcab7	EF-hand calcium binding domain 7	ENSMUSG00000073791	0.56158	8.10071	3.70023	0.0022538	0.0636266	-1.42138
10515943	Ctps	cytidine 5'-triphosphate synthase	ENSMUSG00000028633	0.319749	10.4288	3.69896	0.00225956	0.0636556	-1.42382
10430384	Elfn2	leucine rich repeat and fibronectin type III, extracellular 2	ENSMUSG00000043460	-0.34106	9.82221	-3.69854	0.0022615	0.0636556	-1.42464
10560304	Calm3	calmodulin 3	c(\ENSMUSG00000019370\", \"ENSMUSG00000036438\", \"ENSMUSG00000001175\")"	0.33293	12.7711	3.69726	0.00226732	0.0637255	-1.42709
10545760	Paip2b	poly(A) binding protein interacting protein 2B	ENSMUSG00000045896	0.325076	10.4518	3.69572	0.00227435	0.0638291	-1.43004
10483299	Scn1a	sodium channel, voltage-gated, type I, alpha	ENSMUSG00000064329	0.308913	6.6974	3.69285	0.00228754	0.0640395	-1.43556
10444674	Ly6g6c	lymphocyte antigen 6 complex, locus G6C	ENSMUSG00000007044	-0.317397	8.37329	-3.69263	0.00228856	0.0640395	-1.43599
10461148	Snhg1	small nucleolar RNA host gene (non-protein coding) 1	NA	0.718746	6.31999	3.68922	0.00230434	0.0643865	-1.44254
10578241	Dlc1	deleted in liver cancer 1	ENSMUSG00000031523	-0.325519	9.15928	-3.68776	0.00231114	0.06441	-1.44535
10525733	Setd8	SET domain containing (lysine methyltransferase) 8	ENSMUSG00000049327	0.317297	11.557	3.68758	0.00231194	0.06441	-1.44568
10472994	Mtx2	metaxin 2	ENSMUSG00000027099	-0.344097	12.8295	-3.68686	0.00231531	0.06441	-1.44707
10583586	Slc44a2	solute carrier family 44, member 2	ENSMUSG00000057193	-0.352242	10.884	-3.68522	0.00232297	0.0645293	-1.45022
10525387	Gpn3	GPN-loop GTPase 3	ENSMUSG00000029464	0.340788	9.25363	3.6842	0.00232777	0.0645313	-1.45219
10489018	Rbm39	RNA binding motif protein 39	ENSMUSG00000027620	0.320786	11.4228	3.68376	0.00232981	0.0645313	-1.45303
10551724	Yif1b	Yip1 interacting factor homolog B (S. cerevisiae)	ENSMUSG00000030588	0.389408	12.3314	3.68124	0.00234168	0.0647662	-1.45788
10514896	2210012G02Rik	RIKEN cDNA 2210012G02 gene	ENSMUSG00000028619	0.332968	8.88913	3.68001	0.00234748	0.0648325	-1.46023
10356968	Pam	peptidylglycine alpha-amidating monooxygenase	ENSMUSG00000026335	-0.330237	11.8011	-3.67921	0.00235125	0.0648429	-1.46177
10591270	Olfm2	olfactomedin 2	ENSMUSG00000032172	-0.366849	10.2663	-3.67689	0.00236231	0.0650333	-1.46624
10435791	Mir568	microRNA 568	NA	-0.486968	7.83887	-3.67633	0.00236497	0.0650333	-1.46732
10411739	Ccnb1	cyclin B1	ENSMUSG00000041431	0.302577	12.7179	3.67528	0.00236995	0.0650766	-1.46932
10455088	Pcdhb11	protocadherin beta 11	ENSMUSG00000051486	0.404552	8.31003	3.67001	0.00239526	0.065677	-1.47946
10512279	Cntfr	ciliary neurotrophic factor receptor	ENSMUSG00000028444	-0.339382	12.6568	-3.66716	0.00240906	0.0659605	-1.48493
10558410	Ptpre	protein tyrosine phosphatase, receptor type, E	ENSMUSG00000041836	-0.314421	9.29103	-3.66568	0.00241628	0.0660634	-1.48779
10386058	Sparc	secreted acidic cysteine rich glycoprotein	ENSMUSG00000018593	-0.320602	12.8723	-3.66431	0.00242296	0.0661016	-1.49042
10432190	Adcy6	adenylate cyclase 6	ENSMUSG00000022994	-0.300077	11.2659	-3.66397	0.0024246	0.0661016	-1.49107
10368654	Nt5dc1	5'-nucleotidase domain containing 1	ENSMUSG00000039480	0.333816	9.66945	3.66208	0.00243383	0.0662586	-1.49469
10596200	Tmem108	transmembrane protein 108	ENSMUSG00000042757	-0.303011	11.4457	-3.66129	0.00243773	0.0662702	-1.49622
10411722	Mrps36	mitochondrial ribosomal protein S36	ENSMUSG00000061474	0.355786	10.4262	3.65666	0.00246057	0.0667959	-1.50511
10499924	Lce1e	late cornified envelope 1E	ENSMUSG00000068889	-0.301673	6.67008	-3.65542	0.00246672	0.0668676	-1.50749
10417798	Kcnk5	potassium channel, subfamily K, member 5	ENSMUSG00000023243	0.436731	8.0941	3.65337	0.00247694	0.0670494	-1.51143
10562416	Cebpg	CCAAT/enhancer binding protein (C/EBP), gamma	ENSMUSG00000056216	0.425066	10.9601	3.65149	0.00248638	0.0672098	-1.51506
10364712	Cirbp	cold inducible RNA binding protein	ENSMUSG00000045193	0.34063	10.4602	3.64627	0.00251266	0.0678241	-1.52509
10556426	Parva	parvin, alpha	ENSMUSG00000030770	-0.326379	12.4105	-3.64318	0.00252838	0.0680744	-1.53104
10455065	Pcdhb5	protocadherin beta 5	ENSMUSG00000063687	0.333274	7.02423	3.64304	0.00252907	0.0680744	-1.53129
10390175	Ngfr	nerve growth factor receptor (TNFR superfamily, member 16)	ENSMUSG00000000120	-0.355543	12.355	-3.64208	0.00253396	0.0681101	-1.53314
10425749	Fam109b	family with sequence similarity 109, member B	ENSMUSG00000049687	0.364098	8.02968	3.64035	0.00254284	0.0681489	-1.53647
10525718	Arl6ip4	ADP-ribosylation factor-like 6 interacting protein 4	ENSMUSG00000029404	0.306385	10.3866	3.63992	0.00254501	0.0681489	-1.53728
10500011	Tuft1	tuftelin 1	ENSMUSG00000005968	0.370734	8.47457	3.63971	0.00254612	0.0681489	-1.5377
10386824	Akap10	A kinase (PRKA) anchor protein 10	ENSMUSG00000047804	0.414512	9.70057	3.63655	0.00256239	0.0684145	-1.54377
10368845	Cep57l1	centrosomal protein 57-like 1	ENSMUSG00000019813	0.331832	10.8303	3.63576	0.00256646	0.0684145	-1.54529
10365601	Gnptab	N-acetylglucosamine-1-phosphate transferase, alpha and beta subunits	ENSMUSG00000035311	-0.326786	10.9588	-3.6357	0.0025668	0.0684145	-1.54541
10389929	Cacna1g	calcium channel, voltage-dependent, T type, alpha 1G subunit	ENSMUSG00000020866	-0.340446	9.50721	-3.63481	0.00257139	0.0684223	-1.54712
10388042	6330403K07Rik	RIKEN cDNA 6330403K07 gene	ENSMUSG00000089738	0.332389	8.99268	3.63426	0.00257426	0.0684223	-1.54818
10377405	Aurkb	aurora kinase B	ENSMUSG00000020897	0.321278	11.878	3.6312	0.00259019	0.0686716	-1.55406
10372417	Atxn7l3b	ataxin 7-like 3B	ENSMUSG00000074748	0.316507	11.0162	3.63107	0.00259084	0.0686716	-1.5543
10582162	Cotl1	coactosin-like 1 (Dictyostelium)	ENSMUSG00000031827	-0.29763	11.1698	-3.62987	0.00259713	0.0687429	-1.55661
10424363	Nsmce2	non-SMC element 2 homolog (MMS21, S. cerevisiae)	ENSMUSG00000059586	0.402799	11.4707	3.62804	0.00260675	0.068902	-1.56014
10463945	Dusp5	dual specificity phosphatase 5	ENSMUSG00000034765	-0.337064	10.1203	-3.62734	0.00261043	0.0689038	-1.56148
10585484	Chrna5	cholinergic receptor, nicotinic, alpha polypeptide 5	ENSMUSG00000035594	-0.312363	7.37085	-3.62371	0.00262958	0.0691135	-1.56845
10527012	Lfng	LFNG O-fucosylpeptide 3-beta-N-acetylglucosaminyltransferase	ENSMUSG00000029570	0.370684	10.3097	3.62362	0.00263005	0.0691135	-1.56862
10546567	A130022J15Rik	RIKEN cDNA A130022J15 gene	ENSMUSG00000035245	-0.328568	10.2382	-3.62332	0.00263166	0.0691135	-1.5692
10575074	Tmco7	transmembrane and coiled-coil domains 7	ENSMUSG00000041949	0.333675	9.90862	3.6227	0.00263495	0.0691135	-1.57039
10471550	Rpl12	ribosomal protein L12	c(\ENSMUSG00000038900\", \"ENSMUSG00000063328\")"	0.330808	10.9549	3.62241	0.00263648	0.0691135	-1.57095
10462796	Kif11	kinesin family member 11	ENSMUSG00000012443	0.337211	12.058	3.62126	0.00264262	0.0691795	-1.57316
10526055	Gbas	glioblastoma amplified sequence	ENSMUSG00000029432	0.30779	10.6459	3.62039	0.00264723	0.0692052	-1.57482
10355474	2004-03-01	membrane-associated ring finger (C3HC4) 4	ENSMUSG00000039372	-0.296468	10.5288	-3.61675	0.00266678	0.0695307	-1.58184
10374998	Gpr75	G protein-coupled receptor 75	ENSMUSG00000043999	0.310905	9.06871	3.61671	0.00266697	0.0695307	-1.58191
10379989	Fam33a	family with sequence similarity 33, member A	ENSMUSG00000020492	0.331501	11.1128	3.61535	0.00267429	0.0696264	-1.58452
10350473	B3galt2	UDP-Gal:betaGlcNAc beta 1,3-galactosyltransferase, polypeptide 2	ENSMUSG00000033849	-0.315819	5.59371	-3.61398	0.00268169	0.0697238	-1.58715
10498284	Wwtr1	WW domain containing transcription regulator 1	ENSMUSG00000027803	0.311312	8.83481	3.60969	0.00270499	0.0700568	-1.5954
10355813	Ptprn	protein tyrosine phosphatase, receptor type, N	ENSMUSG00000026204	-0.319256	12.3699	-3.60919	0.00270773	0.0700568	-1.59636
10522160	N4bp2	NEDD4 binding protein 2	ENSMUSG00000037795	-0.337986	10.4915	-3.60919	0.00270773	0.0700568	-1.59636
10558057	Wdr11	WD repeat domain 11	ENSMUSG00000042055	0.337258	10.8556	3.60828	0.00271273	0.0700568	-1.59812
10368893	Lace1	lactation elevated 1	ENSMUSG00000038302	0.303217	9.48649	3.60826	0.00271285	0.0700568	-1.59816
10448094	Lnpep	leucyl/cystinyl aminopeptidase	ENSMUSG00000023845	-0.416584	11.5807	-3.60564	0.00272721	0.0703327	-1.60319
10502766	Lphn2	latrophilin 2	ENSMUSG00000028184	0.333734	8.98693	3.60155	0.00274977	0.0707367	-1.61104
10365260	Txnrd1	thioredoxin reductase 1	ENSMUSG00000020250	0.315438	11.8183	3.60146	0.00275029	0.0707367	-1.61122
10410328	Zfp874b	zinc finger protein 874b	ENSMUSG00000059839	0.38191	7.56064	3.59969	0.00276013	0.070894	-1.61462
10406881	Smn1	survival motor neuron 1	ENSMUSG00000021645	0.316196	10.5552	3.59605	0.00278047	0.0712507	-1.62162
10436978	Cbr3	carbonyl reductase 3	ENSMUSG00000022947	0.381256	8.87576	3.59587	0.00278148	0.0712507	-1.62197
10364194	Lss	lanosterol synthase	ENSMUSG00000033105	-0.326195	12.9569	-3.59488	0.00278705	0.0712976	-1.62387
10469289	Il15ra	interleukin 15 receptor, alpha chain	ENSMUSG00000023206	0.339258	8.69539	3.59205	0.00280298	0.0715262	-1.6293
10506360	Sgip1	SH3-domain GRB2-like (endophilin) interacting protein 1	ENSMUSG00000028524	-0.297863	10.9673	-3.59197	0.00280348	0.0715262	-1.62947
10579468	Haus8	4HAUS augmin-like complex, subunit 8	ENSMUSG00000035439	0.354401	9.51176	3.58897	0.00282045	0.0717843	-1.63522
10352767	Nek2	NIMA (never in mitosis gene a)-related expressed kinase 2	ENSMUSG00000026622	0.313572	10.9331	3.58886	0.00282112	0.0717843	-1.63545
10529344	Haus3	HAUS augmin-like complex, subunit 3	ENSMUSG00000079555	0.307423	7.45178	3.58788	0.00282669	0.0718303	-1.63733
10415144	Ngdn	neuroguidin, EIF4E binding protein	ENSMUSG00000022204	0.293709	9.6321	3.58667	0.0028336	0.0718516	-1.63965
10577096	Pcid2	PCI domain containing 2	ENSMUSG00000038542	0.332515	11.4301	3.58608	0.00283695	0.0718516	-1.64078
10419323	Dlgap5	discs, large (Drosophila) homolog-associated protein 5	ENSMUSG00000037544	0.32313	10.2812	3.58576	0.00283882	0.0718516	-1.64141
10449971	Zfp763	zinc finger protein 763	ENSMUSG00000067430	0.395866	8.91734	3.5846	0.00284546	0.0719242	-1.64363
10385883	Slc22a21	solute carrier family 22 (organic cation transporter), member 21	ENSMUSG00000063652	0.315065	7.09604	3.58344	0.00285212	0.0719971	-1.64586
10567171	Snord14a	small nucleolar RNA, C/D box 14A	NA	0.386838	8.7747	3.58122	0.00286492	0.0722122	-1.65012
10359648	Scyl3	SCY1-like 3 (S. cerevisiae)	ENSMUSG00000026584	0.316774	10.4193	3.58065	0.00286821	0.0722122	-1.65122
10407307	Mocs2	molybdenum cofactor synthesis 2	ENSMUSG00000015536	0.333666	10.2042	3.57918	0.00287677	0.0723324	-1.65406
10496475	Adh5	alcohol dehydrogenase 5 (class III), chi polypeptide	ENSMUSG00000028138	0.350483	11.6365	3.57746	0.00288673	0.0724873	-1.65735
10497188	Il7	interleukin 7	ENSMUSG00000040329	0.307765	6.40755	3.57621	0.00289404	0.0725754	-1.65976
10346634	Nop58	NOP58 ribonucleoprotein homolog (yeast)	ENSMUSG00000026020	0.353719	11.3085	3.57444	0.00290439	0.0726498	-1.66315
10419779	Haus4	HAUS augmin-like complex, subunit 4	ENSMUSG00000022177	-0.291013	10.2915	-3.57388	0.0029077	0.0726498	-1.66424
10571233	Fut10	fucosyltransferase 10	ENSMUSG00000046152	0.31745	9.27241	3.57322	0.00291153	0.0726498	-1.6655
10503431	Nbn	nibrin	ENSMUSG00000028224	0.347852	9.11067	3.5731	0.00291224	0.0726498	-1.66573
10568392	Rgs10	regulator of G-protein signalling 10	ENSMUSG00000030844	0.523679	11.0682	3.57203	0.00291856	0.0727126	-1.66779
10541729	Cdca3	cell division cycle associated 3	ENSMUSG00000023505	0.355929	10.6329	3.5693	0.0029347	0.0728456	-1.67304
10483401	Spc25	SPC25, NDC80 kinetochore complex component, homolog (S. cerevisiae)	ENSMUSG00000005233	0.345508	10.2814	3.56878	0.00293776	0.0728456	-1.67404
10391828	C1ql1	complement component 1, q subcomponent-like 1	ENSMUSG00000045532	-0.407656	11.9818	-3.56851	0.00293936	0.0728456	-1.67456
10395252	2010109K11Rik	RIKEN cDNA 2010109K11 gene	ENSMUSG00000090946	0.375923	8.7209	3.56709	0.00294782	0.0728456	-1.67729
10430825	Cenpm	centromere protein M	ENSMUSG00000068101	0.436045	10.7509	3.56614	0.00295345	0.0728456	-1.67911
10457118	Rttn	rotatin	ENSMUSG00000023066	0.333665	8.84255	3.56568	0.0029562	0.0728456	-1.68
10361169	Hhat	hedgehog acyltransferase	ENSMUSG00000037375	0.365111	9.28198	3.5651	0.00295965	0.0728456	-1.68111
10480492	Cacna1b	calcium channel, voltage-dependent, N type, alpha 1B subunit	ENSMUSG00000004113	-0.299133	11.4656	-3.56328	0.00297057	0.0728456	-1.68461
10344966	Ly96	lymphocyte antigen 96	ENSMUSG00000025779	-0.388272	9.82141	-3.56297	0.00297243	0.0728456	-1.68521
10455813	Lmnb1	lamin B1	ENSMUSG00000024590	0.401295	10.3363	3.56272	0.00297391	0.0728456	-1.68568
10579607	Cnot8	CCR4-NOT transcription complex, subunit 8	ENSMUSG00000020515	0.358526	9.22855	3.56267	0.00297423	0.0728456	-1.68579
10361358	Rgs17	regulator of G-protein signaling 17	ENSMUSG00000019775	0.334651	10.0221	3.56265	0.00297432	0.0728456	-1.68581
10454709	Kif20a	kinesin family member 20A	ENSMUSG00000003779	0.328931	11.4554	3.56185	0.00297914	0.0728456	-1.68736
10461459	Syt7	synaptotagmin VII	ENSMUSG00000024743	-0.357492	9.42636	-3.56143	0.00298167	0.0728456	-1.68817
10537712	Gstk1	glutathione S-transferase kappa 1	ENSMUSG00000029864	0.365988	10.5197	3.56114	0.00298339	0.0728456	-1.68871
10391143	Klhl11	kelch-like 11 (Drosophila)	ENSMUSG00000048732	0.327141	9.57791	3.56088	0.00298497	0.0728456	-1.68922
10488608	Trib3	tribbles homolog 3 (Drosophila)	ENSMUSG00000032715	0.355956	11.3882	3.55832	0.00300046	0.073093	-1.69415
10544841	Cpvl	carboxypeptidase, vitellogenic-like	ENSMUSG00000052955	-0.322599	7.60806	-3.55734	0.00300639	0.073093	-1.69603
10408335	Aldh5a1	aldhehyde dehydrogenase family 5, subfamily A1	ENSMUSG00000035936	0.351144	8.47848	3.55684	0.00300941	0.073093	-1.69698
10541678	C1ra	complement component 1, r subcomponent A	ENSMUSG00000055172	0.405254	8.3211	3.55667	0.00301043	0.073093	-1.69731
10470959	Phyhd1	phytanoyl-CoA dioxygenase domain containing 1	ENSMUSG00000079484	0.329097	8.79737	3.55552	0.00301742	0.0731695	-1.69951
10561306	Pld3	phospholipase D family, member 3	ENSMUSG00000003363	-0.321069	11.4916	-3.55448	0.0030238	0.0732313	-1.70153
10427849	6030458C11Rik	RIKEN cDNA 6030458C11 gene	ENSMUSG00000022195	-0.339981	10.8084	-3.55337	0.00303057	0.0733021	-1.70365
10444957	Ppp1r10	protein phosphatase 1, regulatory subunit 10	ENSMUSG00000039220	-0.317506	11.6885	-3.5509	0.00304569	0.0735746	-1.70839
10494551	Acp6	acid phosphatase 6, lysophosphatidic	ENSMUSG00000028093	0.306404	10.7877	3.55024	0.00304975	0.0735796	-1.70966
10399892	Gpr22	G protein-coupled receptor 22	ENSMUSG00000044067	-0.301507	9.4939	-3.54852	0.00306039	0.0737431	-1.71298
10416510	Nufip1	nuclear fragile X mental retardation protein interacting protein 1	ENSMUSG00000022009	0.330197	10.9957	3.54686	0.00307067	0.0738974	-1.71617
10605081	Bcap31	B-cell receptor-associated protein 31	ENSMUSG00000002015	-0.331638	12.367	-3.54164	0.00310321	0.0744948	-1.7262
10402318	Prima1	proline rich membrane anchor 1	ENSMUSG00000041669	-0.326183	9.65889	-3.54162	0.0031033	0.0744948	-1.72623
10577948	Brf2	BRF2, subunit of RNA polymerase III transcription initiation factor, BRF1-like	ENSMUSG00000031487	0.33981	9.90463	3.53935	0.00311759	0.0746466	-1.7306
10348829	Farp2	FERM, RhoGEF and pleckstrin domain protein 2	ENSMUSG00000034066	-0.291982	8.14528	-3.53837	0.00312374	0.0746466	-1.73248
10521337	Rgs12	regulator of G-protein signaling 12	ENSMUSG00000029101	0.296182	9.40368	3.53836	0.00312383	0.0746466	-1.73251
10541034	Anubl1	AN1, ubiquitin-like, homolog (Xenopus laevis)	ENSMUSG00000042213	0.353456	8.22798	3.53813	0.00312527	0.0746466	-1.73295
10598933	Usp11	ubiquitin specific peptidase 11	ENSMUSG00000031066	0.355739	10.889	3.53643	0.003136	0.0747857	-1.73621
10376887	Snord49a	small nucleolar RNA, C/D box 49A	NA	0.438408	9.03605	3.53597	0.00313893	0.0747857	-1.7371
10345492	Cnnm3	cyclin M3	ENSMUSG00000001138	0.353901	9.6845	3.5343	0.00314951	0.0749442	-1.7403
10447224	Dync2li1	dynein cytoplasmic 2 light intermediate chain 1	ENSMUSG00000024253	0.327879	9.3758	3.52691	0.00319688	0.0759767	-1.75451
10455656	Hsd17b4	hydroxysteroid (17-beta) dehydrogenase 4	ENSMUSG00000024507	0.341415	10.1612	3.52583	0.00320385	0.0759912	-1.75658
10598538	Ssxb1	synovial sarcoma, X member B, breakpoint 1	ENSMUSG00000079705	-0.350492	7.21072	-3.52371	0.0032176	0.0759912	-1.76066
10440037	Nit2	nitrilase family, member 2	ENSMUSG00000022751	0.328267	10.4262	3.52295	0.00322249	0.0759912	-1.7621
10460102	1700034H14Rik	RIKEN cDNA 1700034H14 gene	ENSMUSG00000024645	0.313264	10.2929	3.52277	0.0032237	0.0759912	-1.76246
10511382	Nsmaf	neutral sphingomyelinase (N-SMase) activation associated factor	ENSMUSG00000028245	0.296252	10.0387	3.52225	0.00322708	0.0759912	-1.76346
10565479	l7Rn6	lethal, Chr 7, Rinchik 6	ENSMUSG00000062797	0.325885	11.5997	3.52208	0.0032282	0.0759912	-1.76379
10600082	Nsdhl	NAD(P) dependent steroid dehydrogenase-like	ENSMUSG00000031349	-0.335258	12.3819	-3.52142	0.00323248	0.0759912	-1.76505
10495945	4930422G04Rik	RIKEN cDNA 4930422G04 gene	ENSMUSG00000051278	0.334003	8.60088	3.52125	0.0032336	0.0759912	-1.76538
10384838	Eml6	echinoderm microtubule associated protein like 6	ENSMUSG00000044072	-0.294124	9.56503	-3.52086	0.00323613	0.0759912	-1.76612
10553967	Pcsk6	proprotein convertase subtilisin/kexin type 6	ENSMUSG00000030513	-0.306596	11.4961	-3.52068	0.00323731	0.0759912	-1.76647
10410452	Srd5a1	steroid 5 alpha-reductase 1	ENSMUSG00000021594	0.416728	10.6554	3.51876	0.0032499	0.0760809	-1.77016
10377927	Rnf167	ring finger protein 167	ENSMUSG00000040746	0.332231	10.3374	3.51863	0.00325076	0.0760809	-1.77042
10605104	Pdzd4	PDZ domain containing 4	ENSMUSG00000002006	0.319908	8.50605	3.51795	0.0032552	0.0760809	-1.77171
10469312	Pter	phosphotriesterase related	ENSMUSG00000026730	0.337785	9.2871	3.51767	0.00325708	0.0760809	-1.77226
10541191	Rad52	RAD52 homolog (S. cerevisiae)	ENSMUSG00000030166	0.308366	10.3689	3.51398	0.00328142	0.0765557	-1.77935
10525591	Kntc1	kinetochore associated 1	ENSMUSG00000029414	0.321586	9.66623	3.51331	0.00328582	0.0765649	-1.78062
10370950	Ap3d1	adaptor-related protein complex 3, delta 1 subunit	ENSMUSG00000020198	-0.34646	12.2514	-3.5113	0.0032992	0.0767278	-1.78449
10346564	Casp8	caspase 8	ENSMUSG00000026029	0.345281	10.9952	3.51106	0.00330085	0.0767278	-1.78496
10568266	Phkg2	phosphorylase kinase, gamma 2 (testis)	ENSMUSG00000030815	0.351824	7.69119	3.50858	0.00331737	0.076868	-1.78971
10399725	Sox11	SRY-box containing gene 11	ENSMUSG00000063632	0.410305	9.85303	3.50772	0.00332313	0.076868	-1.79136
10470816	Gle1	GLE1 RNA export mediator (yeast)	ENSMUSG00000019715	0.312176	10.8223	3.5075	0.00332464	0.076868	-1.7918
10355037	Wdr12	WD repeat domain 12	ENSMUSG00000026019	0.327677	9.74517	3.50719	0.0033267	0.076868	-1.79238
10364478	Hcn2	hyperpolarization-activated, cyclic nucleotide-gated K+ 2	ENSMUSG00000020331	0.370512	10.8395	3.50714	0.00332703	0.076868	-1.79248
10580183	Ier2	immediate early response 2	ENSMUSG00000053560	0.359737	8.72791	3.50452	0.00334468	0.07707	-1.79751
10477649	Acss2	acyl-CoA synthetase short-chain family member 2	ENSMUSG00000027605	-0.314032	12.4849	-3.50439	0.00334558	0.07707	-1.79777
10547943	Ncapd2	non-SMC condensin I complex, subunit D2	ENSMUSG00000038252	0.322942	10.0903	3.50405	0.00334788	0.07707	-1.79842
10562500	Dpy19l3	dpy-19-like 3 (C. elegans)	ENSMUSG00000043671	0.313881	9.75066	3.5034	0.00335225	0.0770776	-1.79967
10352267	Lin9	lin-9 homolog (C. elegans)	ENSMUSG00000058729	0.343193	9.81208	3.50277	0.00335656	0.0770838	-1.80089
10369779	Ado	2-aminoethanethiol (cysteamine) dioxygenase	ENSMUSG00000057134	0.301768	10.8161	3.49909	0.0033816	0.0775654	-1.80796
10449926	Zfp799	zinc finger protein 799	ENSMUSG00000059000	0.327779	8.2131	3.49815	0.00338799	0.0776188	-1.80975
10402757	A730018C14Rik	RIKEN cDNA A730018C14 gene	ENSMUSG00000047828	-0.351027	6.91386	-3.4975	0.00339248	0.0776284	-1.81101
10390050	Eme1	essential meiotic endonuclease 1 homolog 1 (S. pombe)	ENSMUSG00000039055	0.430603	9.75283	3.49627	0.00340092	0.0777284	-1.81338
10478633	Mmp9	matrix metallopeptidase 9	ENSMUSG00000017737	0.302078	8.42124	3.49486	0.00341063	0.0778569	-1.81609
10558220	Pstk	phosphoseryl-tRNA kinase	ENSMUSG00000063179	0.334734	9.17622	3.49222	0.00342886	0.0781796	-1.82116
10529953	Gm10048	predicted gene 10048	NA	-0.357496	6.44235	-3.48789	0.00345894	0.0786961	-1.82946
10366476	Ptprb	protein tyrosine phosphatase, receptor type, B	ENSMUSG00000020154	-0.289706	7.61955	-3.48777	0.00345976	0.0786961	-1.82969
10445688	Ccnd3	cyclin D3	ENSMUSG00000034165	-0.358367	10.7979	-3.47971	0.00351654	0.0797634	-1.84517
10484708	Olfr1160	olfactory receptor 1160	ENSMUSG00000075141	0.317111	4.08099	3.47947	0.00351827	0.0797634	-1.84564
10437934	Rpsa	ribosomal protein SA	ENSMUSG00000032518	0.332085	11.6869	3.47934	0.00351922	0.0797634	-1.84589
10587266	Gclc	glutamate-cysteine ligase, catalytic subunit	ENSMUSG00000032350	0.318688	11.9433	3.47547	0.00354681	0.0802933	-1.85332
10515242	Nsun4	NOL1/NOP2/Sun domain family, member 4	ENSMUSG00000028706	0.31009	9.36423	3.47488	0.00355106	0.0802944	-1.85446
10458044	Osgep	O-sialoglycoprotein endopeptidase	ENSMUSG00000006289	0.365585	11.335	3.47235	0.00356925	0.0804285	-1.85932
10485361	B230118H07Rik	RIKEN cDNA B230118H07 gene	ENSMUSG00000027165	0.400453	7.99385	3.47228	0.00356974	0.0804285	-1.85945
10372618	Frs2	fibroblast growth factor receptor substrate 2	ENSMUSG00000020170	0.320493	10.8794	3.47224	0.00357002	0.0804285	-1.85952
10564520	Snora21	small nucleolar RNA, H/ACA box 21	NA	0.399794	9.39586	3.47106	0.00357859	0.0804285	-1.8618
10574812	Ctcf	CCCTC-binding factor	ENSMUSG00000005698	0.309267	10.846	3.47098	0.00357914	0.0804285	-1.86195
10354588	Stk17b	serine/threonine kinase 17b (apoptosis-inducing)	ENSMUSG00000026094	0.357194	9.87127	3.47051	0.00358255	0.0804285	-1.86285
10360454	Opn3	opsin 3	ENSMUSG00000026525	0.354817	9.79175	3.46996	0.0035865	0.0804285	-1.8639
10608672	LOC639910	hypothetical protein LOC639910	NA	-0.298124	6.67263	-3.4679	0.00360144	0.0806688	-1.86785
10408531	Gmds	GDP-mannose 4, 6-dehydratase	ENSMUSG00000038372	0.291973	9.8672	3.4664	0.00361237	0.0808189	-1.87073
10587495	Irak1bp1	interleukin-1 receptor-associated kinase 1 binding protein 1	ENSMUSG00000032251	0.327372	10.6432	3.46565	0.00361784	0.0808465	-1.87217
10562637	Ccnb1	cyclin B1	ENSMUSG00000041431	0.2853	12.8964	3.46474	0.00362452	0.080901	-1.87392
10573115	Rnf150	ring finger protein 150	ENSMUSG00000047747	-0.293626	9.86897	-3.46271	0.00363944	0.0810984	-1.87783
10442986	Luc7l	Luc7 homolog (S. cerevisiae)-like	ENSMUSG00000024188	0.358368	10.4615	3.46238	0.00364186	0.0810984	-1.87846
10351039	Gas5	growth arrest specific 5	NA	0.427557	7.96955	3.45997	0.00365965	0.0813995	-1.88309
10512514	Tln1	talin 1	ENSMUSG00000028465	-0.280843	10.764	-3.45821	0.00367263	0.0815274	-1.88646
10346224	Tmem194b	transmembrane protein 194B	ENSMUSG00000043015	0.315249	9.5725	3.45804	0.00367394	0.0815274	-1.8868
10512098	Aptx	aprataxin	ENSMUSG00000028411	0.304911	8.50334	3.45708	0.00368107	0.0815906	-1.88864
10563112	Snord33	small nucleolar RNA, C/D box 33	NA	0.492239	8.90401	3.4561	0.00368836	0.0816471	-1.89052
10391555	Ppy	pancreatic polypeptide	ENSMUSG00000017316	0.408686	8.88846	3.45517	0.00369527	0.0816471	-1.8923
10545974	Antxr1	anthrax toxin receptor 1	ENSMUSG00000033420	0.30214	9.57474	3.45501	0.00369645	0.0816471	-1.8926
10501754	D3Bwg0562e	DNA segment, Chr 3, Brigham & Women's Genetics 0562 expressed	ENSMUSG00000044667	-0.285736	8.09809	-3.45299	0.00371161	0.0818872	-1.89649
10361065	Mfsd7b	major facilitator superfamily domain containing 7B	ENSMUSG00000066595	-0.31317	11.4631	-3.45086	0.00372759	0.0820343	-1.90058
10408666	Rpp40	ribonuclease P 40 subunit (human)	ENSMUSG00000021418	0.381354	9.35632	3.44967	0.00373657	0.0820343	-1.90286
10500103	Gabpb2	GA repeat binding protein, beta 2	ENSMUSG00000038766	0.328389	9.39199	3.44966	0.00373666	0.0820343	-1.90289
10607602	Ppef1	protein phosphatase with EF hand calcium-binding domain 1	ENSMUSG00000062168	0.341655	6.32303	3.44924	0.00373984	0.0820343	-1.90369
10592988	Ube4a	ubiquitination factor E4A, UFD2 homolog (S. cerevisiae)	ENSMUSG00000059890	-0.286671	11.2533	-3.44893	0.00374216	0.0820343	-1.90428
10515095	Elavl4	ELAV (embryonic lethal, abnormal vision, Drosophila)-like 4 (Hu antigen D)	ENSMUSG00000028546	0.285322	11.047	3.44868	0.00374407	0.0820343	-1.90477
10389606	Prr11	proline rich 11	ENSMUSG00000020493	0.322059	11.4544	3.44547	0.00376843	0.0824714	-1.91093
10545233	Igk	immunoglobulin kappa chain complex	NA	0.537699	5.05019	3.44491	0.00377267	0.0824714	-1.912
10494445	Lix1l	Lix1-like	ENSMUSG00000049288	0.405748	10.9951	3.44418	0.00377827	0.0824995	-1.91341
10594631	Aph1b	anterior pharynx defective 1b homolog (C. elegans)	ENSMUSG00000032375	-0.300343	10.0811	-3.44329	0.00378505	0.0825108	-1.91511
10363773	Rhobtb1	Rho-related BTB domain containing 1	ENSMUSG00000019944	0.304577	9.70249	3.44268	0.00378972	0.0825108	-1.91628
10528790	Xrcc2	X-ray repair complementing defective repair in Chinese hamster cells 2	ENSMUSG00000028933	0.332907	8.49951	3.44241	0.00379176	0.0825108	-1.9168
10560443	Gipr	gastric inhibitory polypeptide receptor	ENSMUSG00000030406	-0.333514	8.52793	-3.44162	0.00379787	0.0825495	-1.91833
10509228	Hnrnpr	heterogeneous nuclear ribonucleoprotein R	ENSMUSG00000066037	0.354927	10.9139	3.43705	0.00383306	0.0832196	-1.92709
10594613	Usp3	ubiquitin specific peptidase 3	ENSMUSG00000032376	0.288973	11.149	3.43649	0.00383742	0.0832196	-1.92817
10590494	Kif15	kinesin family member 15	ENSMUSG00000036768	0.479382	9.95711	3.43465	0.00385166	0.0833079	-1.93169
10521543	Stx18	syntaxin 18	ENSMUSG00000029125	0.308377	10.1327	3.43456	0.0038524	0.0833079	-1.93187
10541144	Cacna2d4	calcium channel, voltage-dependent, alpha 2/delta subunit 4	ENSMUSG00000041460	-0.281091	7.9312	-3.43428	0.00385458	0.0833079	-1.93241
10495935	4930422G04Rik	RIKEN cDNA 4930422G04 gene	ENSMUSG00000051278	0.325892	9.88765	3.43115	0.003879	0.0836812	-1.93841
10368683	1700025K23Rik	RIKEN cDNA 1700025K23 gene	ENSMUSG00000051736	0.292981	8.65835	3.43095	0.00388062	0.0836812	-1.93881
10455967	2610318N02Rik	RIKEN cDNA 2610318N02 gene	ENSMUSG00000049916	0.299684	12.7325	3.42899	0.00389597	0.0837636	-1.94256
10444665	Ddah2	dimethylarginine dimethylaminohydrolase 2	ENSMUSG00000007039	0.34991	11.2457	3.42879	0.00389755	0.0837636	-1.94294
10531707	Lin54	lin-54 homolog (C. elegans)	ENSMUSG00000035310	0.364849	11.2421	3.42855	0.00389944	0.0837636	-1.9434
10508770	Gm13033	prostaglandin-endoperoxide synthase 2 pseudogene	NA	0.344903	8.95848	3.42823	0.003902	0.0837636	-1.94402
10517573	Cela3b	chymotrypsin-like elastase family, member 3B	ENSMUSG00000023433	-0.296266	7.4102	-3.42658	0.00391502	0.0837916	-1.94719
10586017	Uaca	uveal autoantigen with coiled-coil domains and ankyrin repeats	ENSMUSG00000034485	0.315405	9.27764	3.42613	0.00391857	0.0837916	-1.94805
10537787	Tas2r135	taste receptor, type 2, member 135	ENSMUSG00000056203	-0.454582	7.01122	-3.42595	0.00392002	0.0837916	-1.9484
10405811	Habp4	hyaluronic acid binding protein 4	ENSMUSG00000021476	0.29092	10.303	3.42573	0.00392173	0.0837916	-1.94882
10453216	Thumpd2	THUMP domain containing 2	ENSMUSG00000024246	0.297081	8.22353	3.42461	0.00393064	0.0837916	-1.95097
10530130	Rell1	RELT-like 1	ENSMUSG00000047881	0.290886	10.9946	3.42455	0.00393112	0.0837916	-1.95109
10583785	2310047B19Rik	RIKEN cDNA 2310047B19 gene	ENSMUSG00000051238	0.390555	9.38505	3.42324	0.00394154	0.0837916	-1.9536
10476989	Gins1	GINS complex subunit 1 (Psf1 homolog)	ENSMUSG00000027454	0.527897	9.78277	3.42308	0.00394277	0.0837916	-1.9539
10517687	Gm16287	predicted gene 16287	NA	-0.299695	7.93158	-3.42308	0.00394282	0.0837916	-1.95391
10498168	Exosc8	exosome component 8	ENSMUSG00000027752	0.291337	11.9399	3.41971	0.00396972	0.0842693	-1.96037
10588137	Dzip1l	DAZ interacting protein 1-like	ENSMUSG00000037784	0.35636	9.19169	3.41753	0.00398726	0.0843389	-1.96455
10586880	Zfp280d	zinc finger protein 280D	ENSMUSG00000038535	0.362962	7.48285	3.4175	0.00398752	0.0843389	-1.96462
10572616	Dda1	DET1 and DDB1 associated 1	ENSMUSG00000074247	0.3153	12.2172	3.41735	0.00398873	0.0843389	-1.96491
10386951	Hs3st3b1	heparan sulfate (glucosamine) 3-O-sulfotransferase 3B1	ENSMUSG00000070407	0.318628	10.1767	3.41711	0.00399067	0.0843389	-1.96537
10438621	Tra2b	transformer 2 beta homolog (Drosophila)	ENSMUSG00000022858	0.556208	12.1975	3.41619	0.00399804	0.0844011	-1.96712
10388194	Spns2	spinster homolog 2 (Drosophila)	ENSMUSG00000040447	-0.286124	8.13318	-3.41447	0.00401201	0.0845846	-1.97043
10459590	Ptpn2	protein tyrosine phosphatase, non-receptor type 2	ENSMUSG00000024539	0.345983	10.2908	3.41402	0.0040156	0.0845846	-1.97128
10447361	Ttc7	tetratricopeptide repeat domain 7	ENSMUSG00000036918	0.309014	8.96908	3.41136	0.00403727	0.0849474	-1.97639
10532180	Cplx1	complexin 1	ENSMUSG00000033615	0.369049	11.527	3.40951	0.00405236	0.0849924	-1.97993
10594911	Tex9	testis expressed gene 9	ENSMUSG00000090626	0.342736	8.21859	3.40889	0.00405748	0.0849924	-1.98113
10438456	Map6d1	MAP6 domain containing 1	ENSMUSG00000041205	-0.362068	10.1533	-3.40793	0.00406533	0.0849924	-1.98297
10514561	E130114P18Rik	RIKEN cDNA E130114P18 gene	NA	-0.303566	5.76124	-3.4077	0.00406723	0.0849924	-1.98341
10457895	Celf4	CUGBP, Elav-like family member 4	ENSMUSG00000024268	0.288733	10.7592	3.40729	0.00407057	0.0849924	-1.98419
10514054	Nfib	nuclear factor I/B	ENSMUSG00000008575	-0.382937	11.7888	-3.40656	0.00407662	0.0849924	-1.9856
10525989	Gpr133	G protein-coupled receptor 133	ENSMUSG00000044017	-0.28548	8.34553	-3.40652	0.00407692	0.0849924	-1.98567
10458597	Grxcr2	glutaredoxin, cysteine rich 2	ENSMUSG00000073574	-0.295216	8.09554	-3.40597	0.0040815	0.0849924	-1.98674
10383799	Tcn2	transcobalamin 2	ENSMUSG00000020432	0.341083	10.8301	3.40594	0.00408174	0.0849924	-1.98679
10575227	Pmfbp1	polyamine modulated factor 1 binding protein 1	ENSMUSG00000031727	-0.291635	7.7186	-3.40508	0.0040888	0.0849924	-1.98843
10556280	Swap70	SWA-70 protein	ENSMUSG00000031015	0.317074	9.24668	3.40446	0.00409397	0.0849924	-1.98963
10409876	Ctla2a	cytotoxic T lymphocyte-associated protein 2 alpha	ENSMUSG00000044258	-0.344334	10.4048	-3.40377	0.00409962	0.0849924	-1.99094
10376854	Pigl	phosphatidylinositol glycan anchor biosynthesis, class L	ENSMUSG00000014245	0.338288	9.65003	3.40353	0.00410161	0.0849924	-1.99141
10448593	Traf7	TNF receptor-associated factor 7	ENSMUSG00000052752	0.346277	10.9338	3.40352	0.00410176	0.0849924	-1.99144
10447100	Morn2	MORN repeat containing 2	ENSMUSG00000045257	-0.333413	9.93277	-3.40046	0.00412715	0.0853839	-1.9973
10382516	Kctd2	potassium channel tetramerisation domain containing 2	ENSMUSG00000016940	0.302062	10.4912	3.39974	0.00413314	0.0853839	-1.99868
10573128	Tbc1d9	TBC1 domain family, member 9	ENSMUSG00000031709	-0.309192	7.96954	-3.39944	0.00413569	0.0853839	-1.99926
10496204	Cenpe	centromere protein E	ENSMUSG00000045328	0.541308	10.4017	3.39878	0.00414119	0.0853839	-2.00052
10605986	Slc7a3	solute carrier family 7 (cationic amino acid transporter, y+ system), member 3	ENSMUSG00000031297	-0.323326	12.9508	-3.39856	0.00414303	0.0853839	-2.00094
10502898	Ube2l3	ubiquitin-conjugating enzyme E2L 3	ENSMUSG00000038965	-0.275723	12.7783	-3.3975	0.00415193	0.0853945	-2.00298
10438690	Rfc4	replication factor C (activator 1) 4	ENSMUSG00000022881	0.365329	12.1691	3.39622	0.00416267	0.0853945	-2.00543
10578649	Odz3	odd Oz/ten-m homolog 3 (Drosophila)	ENSMUSG00000031561	-0.285635	12.5693	-3.39614	0.00416337	0.0853945	-2.00559
10489629	Cdh22	cadherin 22	ENSMUSG00000053166	-0.318422	9.12582	-3.3961	0.00416366	0.0853945	-2.00566
10397651	Spata7	spermatogenesis associated 7	ENSMUSG00000021007	0.371259	9.31335	3.39583	0.00416591	0.0853945	-2.00617
10440246	Arl13b	ADP-ribosylation factor-like 13B	ENSMUSG00000022911	0.312102	9.78457	3.3948	0.00417467	0.0854627	-2.00817
10416411	Esd	esterase D/formylglutathione hydrolase	ENSMUSG00000021996	0.283013	10.1141	3.39438	0.00417819	0.0854627	-2.00897
10497199	Gm6194	transmembrane protein 189 pseudogene	NA	-0.325936	11.04	-3.39368	0.00418408	0.0854914	-2.0103
10445702	Usp49	ubiquitin specific peptidase 49	c(\ENSMUSG00000090115\", \"ENSMUSG00000023984\")"	0.279451	9.12924	3.39294	0.00419031	0.085497	-2.01172
10354792	1110034B05Rik	RIKEN cDNA 1110034B05 gene	ENSMUSG00000048495	0.322623	9.76173	3.392	0.00419836	0.085497	-2.01354
10585982	Myo9a	myosin IXa	ENSMUSG00000039585	-0.320722	10.6969	-3.39182	0.00419982	0.085497	-2.01387
10544089	Zc3hav1	zinc finger CCCH type, antiviral 1	ENSMUSG00000029826	0.305098	10.561	3.39153	0.00420228	0.085497	-2.01442
10349401	Gpr39	G protein-coupled receptor 39	ENSMUSG00000026343	-0.298856	6.50355	-3.38992	0.00421596	0.0856842	-2.01751
10540141	C130022K22Rik	RIKEN cDNA C130022K22 gene	ENSMUSG00000034083	0.289135	10.3791	3.38928	0.00422142	0.0857038	-2.01874
10381666	Dcakd	dephospho-CoA kinase domain containing	ENSMUSG00000020935	-0.339364	8.26172	-3.38806	0.00423188	0.0858249	-2.02109
10366344	Gm5176	predicted gene 5176	NA	0.311424	7.61843	3.38727	0.00423867	0.0858324	-2.02261
10450746	Rpp21	ribonuclease P 21 subunit (human)	ENSMUSG00000024446	0.333189	8.70471	3.38636	0.00424648	0.0858324	-2.02435
10603768	Efhc2	EF-hand domain (C-terminal) containing 2	ENSMUSG00000025038	0.433454	9.72125	3.38582	0.00425104	0.0858324	-2.02537
10407467	Akr1e1	aldo-keto reductase family 1, member E1	ENSMUSG00000045410	0.290902	9.59111	3.38546	0.00425415	0.0858324	-2.02607
10486112	Bmf	BCL2 modifying factor	ENSMUSG00000040093	-0.296428	9.60042	-3.38539	0.00425474	0.0858324	-2.0262
10450796	Armcx5	armadillo repeat containing, X-linked 5	ENSMUSG00000072969	0.56976	6.87497	3.38359	0.00427031	0.0860555	-2.02967
10525419	P2rx7	purinergic receptor P2X, ligand-gated ion channel, 7	ENSMUSG00000029468	-0.320637	10.5046	-3.3828	0.00427711	0.0861016	-2.03118
10371591	4930547N16Rik	RIKEN cDNA 4930547N16 gene	ENSMUSG00000035365	0.310416	9.79635	3.38195	0.00428441	0.0861577	-2.03279
10569370	Th	tyrosine hydroxylase	ENSMUSG00000000214	-0.381023	9.71493	-3.37931	0.00430732	0.0865273	-2.03786
10529801	Fbxl5	F-box and leucine-rich repeat protein 5	ENSMUSG00000039753	0.312781	10.426	3.37832	0.00431601	0.0866107	-2.03977
10463599	Nfkb2	nuclear factor of kappa light polypeptide gene enhancer in B-cells 2, p49/p100	ENSMUSG00000025225	0.303874	9.48236	3.37562	0.00433958	0.0869623	-2.04494
10492102	Spg20	spastic paraplegia 20, spartin (Troyer syndrome) homolog (human)	ENSMUSG00000036580	0.286272	9.65347	3.37463	0.00434825	0.0869623	-2.04683
10390919	Krtap4-1	keratin associated protein 4-1	ENSMUSG00000063251	-0.285992	7.38519	-3.3743	0.0043512	0.0869623	-2.04747
10460541	Cd248	CD248 antigen, endosialin	ENSMUSG00000056481	-0.29996	9.61126	-3.37423	0.00435176	0.0869623	-2.0476
10585980	Myo9a	myosin IXa	ENSMUSG00000039585	-0.325537	9.12619	-3.37353	0.00435795	0.0869948	-2.04894
10490843	Myef2	myelin basic protein expression factor 2, repressor	ENSMUSG00000027201	-0.383493	4.61167	-3.37083	0.00438178	0.0872957	-2.05412
10456184	Apcdd1	adenomatosis polyposis coli down-regulated 1	ENSMUSG00000071847	-0.294109	9.91451	-3.37056	0.00438415	0.0872957	-2.05463
10446907	Ttc27	tetratricopeptide repeat domain 27	ENSMUSG00000024078	0.311545	9.70409	3.36991	0.00438992	0.0872957	-2.05588
10410959	Atg10	autophagy-related 10 (yeast)	ENSMUSG00000021619	0.275496	11.5751	3.36966	0.00439213	0.0872957	-2.05636
10350102	Ptpn7	protein tyrosine phosphatase, non-receptor type 7	ENSMUSG00000031506	-0.273452	8.82061	-3.36924	0.00439589	0.0872957	-2.05717
10363743	Rtkn2	rhotekin 2	ENSMUSG00000037846	0.283334	9.60935	3.36842	0.00440317	0.0873065	-2.05874
10412943	Nudt13	nudix (nucleoside diphosphate linked moiety X)-type motif 13	ENSMUSG00000021809	0.294192	9.15859	3.36815	0.00440558	0.0873065	-2.05926
10402073	2610021K21Rik	RIKEN cDNA 2610021K21 gene	ENSMUSG00000021176	0.330854	9.24875	3.36633	0.00442185	0.0875379	-2.06275
10560868	Zfp575	zinc finger protein 575	ENSMUSG00000066721	0.346357	10.2334	3.36471	0.0044363	0.0877329	-2.06585
10497773	Mccc1	methylcrotonoyl-Coenzyme A carboxylase 1 (alpha)	ENSMUSG00000027709	0.293952	9.30385	3.36295	0.00445211	0.0879544	-2.06922
10443808	Ndufv3	NADH dehydrogenase (ubiquinone) flavoprotein 3	ENSMUSG00000024038	-0.296388	10.685	-3.36242	0.00445689	0.0879579	-2.07024
10384717	Pex13	peroxisomal biogenesis factor 13	ENSMUSG00000020283	0.281735	10.952	3.36134	0.00446662	0.0880048	-2.07231
10360957	Kctd3	potassium channel tetramerisation domain containing 3	ENSMUSG00000026608	0.283743	11.1562	3.36074	0.00447204	0.0880048	-2.07346
10499187	Ube2l3	ubiquitin-conjugating enzyme E2L 3	ENSMUSG00000038965	-0.271825	12.8768	-3.36062	0.0044731	0.0880048	-2.07369
10598474	Slc35a2	solute carrier family 35 (UDP-galactose transporter), member A2	ENSMUSG00000031156	-0.330597	10.3488	-3.3589	0.00448868	0.0882204	-2.07699
10408455	Cdkal1	CDK5 regulatory subunit associated protein 1-like 1	ENSMUSG00000006191	0.29244	10.8597	3.35598	0.00451526	0.0886164	-2.08259
10346651	Bmpr2	bone morphogenic protein receptor, type II (serine/threonine kinase)	ENSMUSG00000067336	-0.331841	12.4137	-3.35567	0.00451812	0.0886164	-2.08319
10520553	Tmem214	transmembrane protein 214	ENSMUSG00000038828	-0.379685	11.3524	-3.35463	0.00452763	0.0887119	-2.08518
10366196	Ppfia2	protein tyrosine phosphatase, receptor type, f polypeptide (PTPRF), interacting protein (liprin), alpha 2	ENSMUSG00000053825	-0.3414	10.4172	-3.3541	0.00453246	0.0887154	-2.08619
10443786	Pde9a	phosphodiesterase 9A	ENSMUSG00000041119	-0.28765	9.29735	-3.34963	0.00457355	0.0894278	-2.09475
10514292	Ifna14	interferon, alpha 14	ENSMUSG00000089770	-0.312227	7.37236	-3.34648	0.00460275	0.0899068	-2.10079
10489912	Tmem189	transmembrane protein 189	ENSMUSG00000090213	-0.349145	12.0844	-3.34511	0.00461549	0.0899521	-2.10341
10385034	Rpsa	ribosomal protein SA	ENSMUSG00000032518	0.3188	11.8495	3.34484	0.00461807	0.0899521	-2.10394
10438527	Camk2n2	calcium/calmodulin-dependent protein kinase II inhibitor 2	ENSMUSG00000051146	0.338144	10.6897	3.34405	0.00462544	0.0899521	-2.10545
10512728	Tstd2	thiosulfate sulfurtransferase (rhodanese)-like domain containing 2	ENSMUSG00000035495	0.280193	10.0912	3.34358	0.00462978	0.0899521	-2.10634
10387659	Nlgn2	neuroligin 2	ENSMUSG00000051790	-0.284001	10.0546	-3.34349	0.00463064	0.0899521	-2.10651
10394978	Rrm2	ribonucleotide reductase M2	ENSMUSG00000020649	0.32066	11.3012	3.3432	0.00463336	0.0899521	-2.10707
10573234	Lphn1	latrophilin 1	ENSMUSG00000013033	-0.270656	11.882	-3.34195	0.00464504	0.0900152	-2.10946
10468046	Lbx1	ladybird homeobox homolog 1 (Drosophila)	ENSMUSG00000025216	-0.282231	9.28395	-3.34185	0.00464604	0.0900152	-2.10966
10597878	C85492	expressed sequence C85492	ENSMUSG00000066235	-0.348545	10.0076	-3.33971	0.00466616	0.0903134	-2.11376
10578746	BC088983	cDNA sequence BC088983	ENSMUSG00000038215	0.380841	9.20407	3.33919	0.00467101	0.0903157	-2.11474
10507112	Stil	Scl/Tal1 interrupting locus	ENSMUSG00000028718	0.324887	10.2375	3.33795	0.00468274	0.090431	-2.11712
10354542	Pms1	postmeiotic segregation increased 1 (S. cerevisiae)	ENSMUSG00000026098	0.401943	9.35357	3.33756	0.00468645	0.090431	-2.11787
10421436	Fgf17	fibroblast growth factor 17	ENSMUSG00000022101	-0.30289	7.92119	-3.33695	0.00469223	0.090451	-2.11904
10450199	Btnl7	butyrophilin-like 7	ENSMUSG00000061728	-0.29564	6.71983	-3.33607	0.00470056	0.0905202	-2.12072
10539220	AW146020	expressed sequence AW146020	ENSMUSG00000035125	0.42817	8.82469	3.33531	0.00470777	0.0905677	-2.12218
10496417	Rg9mtd2	RNA (guanine-9-) methyltransferase domain containing 2	ENSMUSG00000004127	0.286979	11.07	3.33325	0.00472747	0.0906447	-2.12614
10475435	Rps12	ribosomal protein S12	c(\ENSMUSG00000078087\", \"ENSMUSG00000067038\", \"ENSMUSG00000061983\")"	0.293135	12.7389	3.33119	0.00474716	0.0906447	-2.13007
10372629	Yeats4	YEATS domain containing 4	ENSMUSG00000020171	0.372367	11.4272	3.32993	0.0047593	0.0906447	-2.1325
10422321	Dzip1	DAZ interacting protein 1	ENSMUSG00000042156	0.378105	9.33395	3.32984	0.00476015	0.0906447	-2.13266
10505064	Tmem38b	transmembrane protein 38B	ENSMUSG00000028420	0.290942	9.04459	3.32515	0.00480545	0.0906447	-2.14164
10504106	Il11ra1	interleukin 11 receptor, alpha chain 1	ENSMUSG00000073889	-0.295281	9.43452	-3.32511	0.00480588	0.0906447	-2.14173
10420846	Fzd3	frizzled homolog 3 (Drosophila)	ENSMUSG00000007989	-0.274264	9.96208	-3.32504	0.00480653	0.0906447	-2.14186
10469197	Mir669a-2	microRNA 669a-2	NA	0.321356	5.02141	3.32501	0.00480677	0.0906447	-2.1419
10469201	Mir669a-2	microRNA 669a-2	NA	0.321356	5.02141	3.32501	0.00480677	0.0906447	-2.1419
10469205	Mir669a-2	microRNA 669a-2	NA	0.321356	5.02141	3.32501	0.00480677	0.0906447	-2.1419
10469209	Mir669a-2	microRNA 669a-2	NA	0.321356	5.02141	3.32501	0.00480677	0.0906447	-2.1419
10469211	Mir669a-2	microRNA 669a-2	NA	0.321356	5.02141	3.32501	0.00480677	0.0906447	-2.1419
10469215	Mir669a-2	microRNA 669a-2	NA	0.321356	5.02141	3.32501	0.00480677	0.0906447	-2.1419
10469219	Mir669a-2	microRNA 669a-2	NA	0.321356	5.02141	3.32501	0.00480677	0.0906447	-2.1419
10469223	Mir669a-2	microRNA 669a-2	NA	0.321356	5.02141	3.32501	0.00480677	0.0906447	-2.1419
10469229	Mir669a-2	microRNA 669a-2	NA	0.321356	5.02141	3.32501	0.00480677	0.0906447	-2.1419
10469233	Mir669a-2	microRNA 669a-2	NA	0.321356	5.02141	3.32501	0.00480677	0.0906447	-2.1419
10469235	Mir669a-2	microRNA 669a-2	NA	0.321356	5.02141	3.32501	0.00480677	0.0906447	-2.1419
10469241	Mir669a-2	microRNA 669a-2	NA	0.321356	5.02141	3.32501	0.00480677	0.0906447	-2.1419
10469245	Mir669a-2	microRNA 669a-2	NA	0.321356	5.02141	3.32501	0.00480677	0.0906447	-2.1419
10608655	H60a	histocompatibility 60a	NA	-0.277486	11.9846	-3.32408	0.00481581	0.0906521	-2.14368
10394060	Sectm1b	secreted and transmembrane 1B	ENSMUSG00000039364	-0.288333	6.27653	-3.324	0.00481666	0.0906521	-2.14385
10577190	Rasa3	RAS p21 protein activator 3	ENSMUSG00000031453	0.2842	11.4075	3.32245	0.00483171	0.0907772	-2.14681
10381860	Mettl2	methyltransferase like 2	ENSMUSG00000020691	0.275825	11.521	3.32203	0.00483587	0.0907772	-2.14762
10482802	Cytip	cytohesin 1 interacting protein	ENSMUSG00000026832	-0.289489	6.04683	-3.32179	0.00483822	0.0907772	-2.14808
10607143	Capn6	calpain 6	ENSMUSG00000067276	0.397692	11.6463	3.32136	0.00484234	0.0907772	-2.14889
10600419	Plxna3	plexin A3	ENSMUSG00000031398	-0.277324	10.7617	-3.31805	0.00487489	0.0912978	-2.15524
10472240	Tanc1	tetratricopeptide repeat, ankyrin repeat and coiled-coil containing 1	ENSMUSG00000035168	0.27294	11.2415	3.31496	0.00490542	0.0914787	-2.16116
10523758	Lrrc8b	leucine rich repeat containing 8 family, member B	ENSMUSG00000070639	-0.27818	12.198	-3.31447	0.00491024	0.0914787	-2.16209
10604982	Pnma5	paraneoplastic antigen family 5	ENSMUSG00000050424	0.315943	10.0646	3.31374	0.00491749	0.0914787	-2.16349
10580160	Mri1	methylthioribose-1-phosphate isomerase homolog (S. cerevisiae)	ENSMUSG00000004996	0.355713	9.53422	3.31366	0.00491834	0.0914787	-2.16365
10497149	Wls	wntless homolog (Drosophila)	ENSMUSG00000028173	0.374383	7.45993	3.31301	0.00492472	0.0914787	-2.16488
10400072	Scin	scinderin	ENSMUSG00000002565	-0.300108	6.60215	-3.31297	0.00492519	0.0914787	-2.16497
10356082	Plscr1	phospholipid scramblase 1	ENSMUSG00000032369	0.327988	10.6097	3.31274	0.00492744	0.0914787	-2.1654
10494945	Syt6	synaptotagmin VI	ENSMUSG00000027849	-0.270017	10.5724	-3.31269	0.00492799	0.0914787	-2.16551
10412616	Rpp14	ribonuclease P 14 subunit (human)	ENSMUSG00000023156	0.299459	9.69129	3.3125	0.00492986	0.0914787	-2.16587
10529142	Ppm1g	protein phosphatase 1G (formerly 2C), magnesium-dependent, gamma isoform	ENSMUSG00000029147	0.382079	10.7133	3.31169	0.00493792	0.0914787	-2.16741
10437376	Srl	sarcalumenin	ENSMUSG00000022519	0.320372	9.03158	3.31148	0.00493999	0.0914787	-2.16781
10361651	Nup43	nucleoporin 43	ENSMUSG00000040034	0.293716	11.6008	3.31108	0.00494401	0.0914787	-2.16858
10413640	Nek4	NIMA (never in mitosis gene a)-related expressed kinase 4	ENSMUSG00000021918	0.292357	9.32738	3.31079	0.00494687	0.0914787	-2.16913
10519951	Pion	pigeon homolog (Drosophila)	ENSMUSG00000039934	0.329528	7.71245	3.30835	0.00497133	0.091842	-2.1738
10603538	Ssxb1	synovial sarcoma, X member B, breakpoint 1	ENSMUSG00000079705	-0.391486	6.96851	-3.30747	0.00498017	0.0918493	-2.17549
10501143	Ahcyl1	S-adenosylhomocysteine hydrolase-like 1	ENSMUSG00000027893	0.285005	12.2578	3.30717	0.00498317	0.0918493	-2.17606
10389099	Rad51l3	RAD51-like 3 (S. cerevisiae)	ENSMUSG00000018841	0.279492	9.28011	3.30688	0.00498616	0.0918493	-2.17662
10549473	Caprin2	caprin family member 2	ENSMUSG00000030309	0.291219	9.87985	3.30576	0.00499747	0.0919531	-2.17877
10462702	Hectd2	HECT domain containing 2	ENSMUSG00000041180	0.369429	10.2101	3.30536	0.00500143	0.0919531	-2.17952
10419803	4931414P19Rik	RIKEN cDNA 4931414P19 gene	ENSMUSG00000022179	0.321164	8.23598	3.30435	0.00501167	0.0920222	-2.18146
10504056	Ubap1	ubiquitin-associated protein 1	ENSMUSG00000028437	0.291529	11.1438	3.30392	0.005016	0.0920222	-2.18228
10475517	AA467197	expressed sequence AA467197	ENSMUSG00000033213	0.28797	6.78816	3.30356	0.00501966	0.0920222	-2.18297
10488237	Snx5	sorting nexin 5	ENSMUSG00000027423	0.329491	11.9062	3.30281	0.0050273	0.0920739	-2.18441
10576439	Cog2	component of oligomeric golgi complex 2	ENSMUSG00000031979	0.320076	9.52402	3.30115	0.0050442	0.0922948	-2.18759
10399036	Uevld	UEV and lactate/malate dehyrogenase domains	ENSMUSG00000043262	0.348613	10.0052	3.30049	0.00505094	0.0923297	-2.18885
10565486	Eed	embryonic ectoderm development	ENSMUSG00000030619	0.29175	10.1368	3.29948	0.00506125	0.0924296	-2.19079
10406736	F2rl2	coagulation factor II (thrombin) receptor-like 2	ENSMUSG00000021675	-0.283663	12.3636	-3.29828	0.00507346	0.0924324	-2.19307
10449999	Zfp101	zinc finger protein 101	ENSMUSG00000055240	0.354358	8.45779	3.29814	0.00507497	0.0924324	-2.19335
10468853	Sfxn4	sideroflexin 4	ENSMUSG00000063698	0.317243	8.47577	3.29804	0.00507594	0.0924324	-2.19353
10558590	Prap1	proline-rich acidic protein 1	ENSMUSG00000025467	-0.271082	7.37507	-3.29445	0.00511292	0.0930172	-2.20041
10520025	Psmc2	proteasome (prosome, macropain) 26S subunit, ATPase 2	ENSMUSG00000028932	0.283	10.8719	3.29376	0.00512002	0.0930244	-2.20172
10590801	Birc3	baculoviral IAP repeat-containing 3	ENSMUSG00000032000	0.285413	8.31997	3.29334	0.00512439	0.0930244	-2.20253
10375951	9530068E07Rik	RIKEN cDNA 9530068E07 gene	ENSMUSG00000036275	-0.270507	12.8393	-3.293	0.00512794	0.0930244	-2.20318
10517899	C630004L07Rik	RIKEN cDNA C630004L07 gene	NA	-0.287026	6.29506	-3.29251	0.00513294	0.0930266	-2.20411
10345616	Lipt1	lipoyltransferase 1	ENSMUSG00000037216	0.317586	8.81684	3.29198	0.00513848	0.0930386	-2.20513
10566514	Mrps36	mitochondrial ribosomal protein S36	ENSMUSG00000061474	0.315295	10.3649	3.29059	0.00515297	0.0932027	-2.2078
10400326	Eapp	E2F-associated phosphoprotein	ENSMUSG00000054302	0.33922	9.66949	3.29017	0.00515731	0.0932027	-2.20859
10348096	Dis3l2	DIS3 mitotic control homolog (S. cerevisiae)-like 2	ENSMUSG00000053333	0.290546	10.293	3.28963	0.00516298	0.0932169	-2.20963
10387855	Alox15	arachidonate 15-lipoxygenase	ENSMUSG00000018924	-0.271642	7.15031	-3.2863	0.0051978	0.0937569	-2.216
10440513	Cyyr1	cysteine and tyrosine-rich protein 1	ENSMUSG00000041134	-0.286147	9.78026	-3.28439	0.00521785	0.0940298	-2.21964
10476526	2210009G21Rik	RIKEN cDNA 2210009G21 gene	ENSMUSG00000027281	0.363928	9.49236	3.28267	0.00523606	0.0942309	-2.22294
10359837	Fmo9	flavin containing monooxygenase 9	ENSMUSG00000026560	-0.286257	6.38156	-3.2824	0.00523889	0.0942309	-2.22346
10387516	Shbg	sex hormone binding globulin	ENSMUSG00000005202	-0.299318	8.7551	-3.28099	0.00525384	0.0944109	-2.22615
10485667	Dnajc24	DnaJ (Hsp40) homolog, subfamily C, member 24	ENSMUSG00000027166	0.341995	10.0046	3.28004	0.00526387	0.0945021	-2.22796
10393662	Nptx1	neuronal pentraxin 1	ENSMUSG00000025582	-0.270162	7.99076	-3.27868	0.00527844	0.0946745	-2.23058
10487577	Ckap2l	cytoskeleton associated protein 2-like	ENSMUSG00000048327	0.300556	10.6462	3.27766	0.00528925	0.0947018	-2.23251
10461154	Snhg1	small nucleolar RNA host gene (non-protein coding) 1	NA	0.426223	7.4289	3.27696	0.00529677	0.0947018	-2.23386
10423068	Rad1	RAD1 homolog (S. pombe)	ENSMUSG00000022248	0.338164	9.89173	3.2768	0.00529844	0.0947018	-2.23416
10518763	Slc45a1	solute carrier family 45, member 1	ENSMUSG00000039838	-0.300098	8.44687	-3.27597	0.00530731	0.0947018	-2.23574
10441244	Fam3b	family with sequence similarity 3, member B	ENSMUSG00000022938	-0.289302	6.93949	-3.27583	0.00530887	0.0947018	-2.23602
10599925	Styx	serine/threonine/tyrosine interaction protein	c(\ENSMUSG00000053205\", \"ENSMUSG00000071748\")"	0.281912	10.1002	3.27575	0.00530973	0.0947018	-2.23617
10394690	E2f6	E2F transcription factor 6	ENSMUSG00000057469	0.522798	10.1635	3.27411	0.00532733	0.094927	-2.2393
10597648	Myd88	myeloid differentiation primary response gene 88	ENSMUSG00000032508	0.294474	9.19096	3.27244	0.00534533	0.0951113	-2.2425
10434845	Il1rap	interleukin 1 receptor accessory protein	ENSMUSG00000022514	0.329098	8.4594	3.2722	0.00534792	0.0951113	-2.24296
10503251	2610301B20Rik	RIKEN cDNA 2610301B20 gene	ENSMUSG00000059482	0.296549	10.9375	3.27176	0.00535263	0.0951113	-2.24379
10420668	Mir15a	microRNA 15a	NA	0.676722	8.83311	3.27118	0.00535895	0.0951351	-2.24491
10525158	Oas1b	2'-5' oligoadenylate synthetase 1B	ENSMUSG00000029605	0.335569	8.71259	3.26942	0.00537805	0.0953854	-2.24827
10352829	A130010J15Rik	RIKEN cDNA A130010J15 gene	ENSMUSG00000079144	0.296049	9.42535	3.26615	0.00541366	0.0959278	-2.25452
10451363	Srf	serum response factor	ENSMUSG00000015605	0.356433	10.2236	3.26339	0.0054439	0.0963743	-2.25979
10443494	Pi16	peptidase inhibitor 16	ENSMUSG00000024011	-0.359312	9.87566	-3.26268	0.00545177	0.0964241	-2.26116
10492136	Dclk1	doublecortin-like kinase 1	ENSMUSG00000027797	-0.301556	10.6105	-3.26185	0.00546092	0.0964965	-2.26275
10408693	F13a1	coagulation factor XIII, A1 subunit	ENSMUSG00000039109	-0.300988	8.19091	-3.26107	0.00546944	0.0965576	-2.26422
10408755	Muted	muted	ENSMUSG00000038982	0.296562	9.46902	3.26062	0.0054745	0.0965577	-2.2651
10371356	Appl2	adaptor protein, phosphotyrosine interaction, PH domain and leucine zipper containing 2	ENSMUSG00000020263	0.285959	9.67417	3.2586	0.00549683	0.096862	-2.26895
10382376	Ttyh2	tweety homolog 2 (Drosophila)	ENSMUSG00000034714	-0.308357	12.1514	-3.25769	0.00550697	0.0968855	-2.27069
10503198	Chd7	chromodomain helicase DNA binding protein 7	ENSMUSG00000041235	0.344583	9.33578	3.25757	0.00550832	0.0968855	-2.27092
10355329	Bard1	BRCA1 associated RING domain 1	ENSMUSG00000026196	0.395699	9.86085	3.25636	0.00552171	0.0970317	-2.27322
10564233	Mir344	microRNA 344	NA	-0.374431	7.86888	-3.25531	0.00553345	0.0971119	-2.27523
10463282	Entpd7	ectonucleoside triphosphate diphosphohydrolase 7	ENSMUSG00000025192	-0.331476	10.3084	-3.25504	0.00553646	0.0971119	-2.27575
10352703	Mfsd7b	major facilitator superfamily domain containing 7B	ENSMUSG00000066595	-0.354079	9.28789	-3.25244	0.00556561	0.0973505	-2.28072
10479765	Suv39h2	suppressor of variegation 3-9 homolog 2 (Drosophila)	ENSMUSG00000026646	0.392265	10.3713	3.2514	0.0055773	0.0973505	-2.2827
10588482	Poc1a	POC1 centriolar protein homolog A (Chlamydomonas)	ENSMUSG00000023345	0.369561	9.08177	3.25128	0.00557869	0.0973505	-2.28294
10373223	Lrp1	low density lipoprotein receptor-related protein 1	ENSMUSG00000040249	-0.348311	10.344	-3.25085	0.00558355	0.0973505	-2.28376
10435752	Lsamp	limbic system-associated membrane protein	ENSMUSG00000061080	-0.27333	8.52951	-3.25071	0.00558517	0.0973505	-2.28403
10493380	Gm6835	predicted gene 6835	NA	-0.319801	8.0307	-3.25012	0.00559177	0.0973505	-2.28515
10434733	Eif4a2	eukaryotic translation initiation factor 4A2	ENSMUSG00000022884	0.655061	11.4322	3.25011	0.00559185	0.0973505	-2.28516
10546066	Isy1	ISY1 splicing factor homolog (S. cerevisiae)	ENSMUSG00000030056	0.309694	10.275	3.24962	0.00559738	0.0973505	-2.2861
10601447	Fam46d	family with sequence similarity 46, member D	ENSMUSG00000073007	0.343154	6.87549	3.24943	0.00559962	0.0973505	-2.28648
10547282	Zfp9	zinc finger protein 9	ENSMUSG00000072623	-0.271571	10.9035	-3.2493	0.00560107	0.0973505	-2.28672
10401852	4930534B04Rik	RIKEN cDNA 4930534B04 gene	ENSMUSG00000061533	0.325547	8.58305	3.24787	0.0056172	0.097542	-2.28944
10537146	Akr1b8	aldo-keto reductase family 1, member B8	ENSMUSG00000029762	0.28017	10.393	3.24693	0.00562795	0.0976197	-2.29125
10363786	Ank3	ankyrin 3, epithelial	ENSMUSG00000069601	-0.291539	11.4417	-3.24658	0.00563191	0.0976197	-2.29192
10512334	Il11ra2	interleukin 11 receptor, alpha chain 2	c(\ENSMUSG00000073876\", \"ENSMUSG00000066201\", \"ENSMUSG00000078735\")"	-0.285565	9.40851	-3.24545	0.00564481	0.097666	-2.29408
10512356	Il11ra2	interleukin 11 receptor, alpha chain 2	c(\ENSMUSG00000073876\", \"ENSMUSG00000066201\", \"ENSMUSG00000078735\")"	-0.285565	9.40851	-3.24545	0.00564481	0.097666	-2.29408
10447097	Gemin6	gem (nuclear organelle) associated protein 6	ENSMUSG00000055760	0.418188	9.45346	3.24481	0.00565201	0.097702	-2.29529
10585988	Myo9a	myosin IXa	ENSMUSG00000039585	-0.299904	10.2014	-3.24282	0.00567477	0.0980066	-2.29909
10478825	Ddx27	DEAD (Asp-Glu-Ala-Asp) box polypeptide 27	ENSMUSG00000017999	0.280119	10.6187	3.2417	0.00568762	0.0980703	-2.30123
10427166	Espl1	extra spindle poles-like 1 (S. cerevisiae)	ENSMUSG00000058290	0.347321	10.6261	3.2415	0.00568999	0.0980703	-2.30162
10473531	Olfr1121	olfactory receptor 1121	ENSMUSG00000070852	-0.294241	5.66255	-3.24116	0.00569387	0.0980703	-2.30227
10477467	Bpifa3	BPI fold containing family A, member 3	ENSMUSG00000027482	-0.264194	5.56658	-3.23993	0.00570797	0.0982244	-2.30461
10352971	Rb1cc1	RB1-inducible coiled-coil 1	ENSMUSG00000025907	-0.293113	9.48416	-3.23907	0.00571794	0.0982899	-2.30626
10386934	Wsb2	WD repeat and SOCS box-containing 2	ENSMUSG00000029364	-0.282516	11.9067	-3.23871	0.00572208	0.0982899	-2.30694
10372410	Glipr1	GLI pathogenesis-related 1 (glioma)	ENSMUSG00000056888	0.388752	8.00131	3.23629	0.00575008	0.0986822	-2.31156
10576010	Gse1	genetic suppressor element 1	ENSMUSG00000031822	-0.276524	10.8155	-3.23466	0.00576909	0.0989195	-2.31468
10425721	Mir33	microRNA 33	NA	-0.277856	4.6561	-3.23357	0.00578173	0.0990472	-2.31675
10515836	Ccnb1	cyclin B1	ENSMUSG00000041431	0.29308	12.6298	3.23287	0.00579	0.0990998	-2.3181
10344939	Terf1	telomeric repeat binding factor 1	ENSMUSG00000025925	0.406653	10.5099	3.23102	0.00581163	0.0992147	-2.32163
10457733	B4galt6	UDP-Gal:betaGlcNAc beta 1,4-galactosyltransferase, polypeptide 6	ENSMUSG00000056124	-0.276105	11.6682	-3.23085	0.00581359	0.0992147	-2.32195
10386624	Tmem11	transmembrane protein 11	ENSMUSG00000043284	0.296062	10.1074	3.23057	0.00581696	0.0992147	-2.3225
10590640	4930433N12Rik	RIKEN cDNA 4930433N12 gene	NA	0.29316	4.62623	3.22999	0.00582376	0.0992147	-2.3236
10584271	Tmem218	transmembrane protein 218	ENSMUSG00000032121	0.278444	8.27844	3.22984	0.00582547	0.0992147	-2.32388
10363173	Gja1	gap junction protein, alpha 1	ENSMUSG00000050953	-0.304144	6.81217	-3.22964	0.0058279	0.0992147	-2.32427
10494351	Mtmr11	myotubularin related protein 11	ENSMUSG00000045934	0.315714	8.41188	3.2281	0.005846	0.0994194	-2.3272
10350777	Acbd6	acyl-Coenzyme A binding domain containing 6	ENSMUSG00000033701	0.316776	10.9213	3.22773	0.00585034	0.0994194	-2.32791
10453867	Rbbp8	retinoblastoma binding protein 8	ENSMUSG00000041238	0.319916	10.8334	3.22571	0.00587425	0.0997369	-2.33176

## Sheet: GO - Transient Pou3f3 KD
GO_ID	LEVEL(S)	TERM	NB_IN_REF	FREQ_IN_REF	NB_IN_SET	FREQ_IN_SET	P_VALUE	ENRICHMENT/DEPLETION	GENES_IN_SET
GO:0007067	6,8,7,5	mitosis	191	0.013	40	0.058	7.13459e-16	E	Cdca3,Ncapg2,Cdc25c,Nde1,Cenph,Aurkb,Cenpe,Haus8,Cdca5,Ncapd2,Ccnb1,6720463M24Rik,Cep55,Haus4,Cdca8,F630043A04Rik,Fbxo5,Smc4,Cdc25b,Haus3,Nek2,Kif11,Ncaph,2610039C10Rik,Zwilch,Bub1b,Setd8,Cdca2,Lrrcc1,Nedd1,Terf1,Spc25,Anln,Incenp,Spag5,Ndc80,Nuf2,Nsl1,Nek4,Kntc1
GO:0000280	5	nuclear division	191	0.013	40	0.058	7.13459e-16	E	Cdca3,Ncapg2,Cdc25c,Nde1,Cenph,Aurkb,Cenpe,Haus8,Cdca5,Ncapd2,Ccnb1,6720463M24Rik,Cep55,Haus4,Cdca8,F630043A04Rik,Fbxo5,Smc4,Cdc25b,Haus3,Nek2,Kif11,Ncaph,2610039C10Rik,Zwilch,Bub1b,Setd8,Cdca2,Lrrcc1,Nedd1,Terf1,Spc25,Anln,Incenp,Spag5,Ndc80,Nuf2,Nsl1,Nek4,Kntc1
GO:0000087	7,5,6	M phase of mitotic cell cycle	192	0.0131	40	0.058	8.60723e-16	E	Cdca3,Ncapg2,Cdc25c,Nde1,Cenph,Aurkb,Cenpe,Haus8,Cdca5,Ncapd2,Ccnb1,6720463M24Rik,Cep55,Haus4,Cdca8,F630043A04Rik,Fbxo5,Smc4,Cdc25b,Haus3,Nek2,Kif11,Ncaph,2610039C10Rik,Zwilch,Bub1b,Setd8,Cdca2,Lrrcc1,Nedd1,Terf1,Spc25,Anln,Incenp,Spag5,Ndc80,Nuf2,Nsl1,Nek4,Kntc1
GO:0022403	5,4	cell cycle phase	324	0.0221	53	0.0768	9.54683e-16	E	Cdca3,Ncapg2,Cdc25c,Pkia,Nde1,Cenph,Tpx2,Aurkb,Cenpe,Haus8,Mre11a,Rbbp8,Espl1,Chek1,Cdca5,Ncapd2,Tacc3,E2f6,Ccnb1,6720463M24Rik,Cep55,Lfng,Haus4,Cdca8,Suv39h2,F630043A04Rik,Fbxo5,Smc4,Cdc25b,Haus3,Nek2,Kif11,Ncaph,2610039C10Rik,Zwilch,Bub1b,Anp32b,Setd8,Cdca2,Lrrcc1,Nedd1,Terf1,Spc25,Mnd1,Anln,Incenp,Spag5,Nbn,Ndc80,Nuf2,Nsl1,Nek4,Kntc1
GO:0048285	4	organelle fission	195	0.0133	40	0.058	1.49905e-15	E	Cdca3,Ncapg2,Cdc25c,Nde1,Cenph,Aurkb,Cenpe,Haus8,Cdca5,Ncapd2,Ccnb1,6720463M24Rik,Cep55,Haus4,Cdca8,F630043A04Rik,Fbxo5,Smc4,Cdc25b,Haus3,Nek2,Kif11,Ncaph,2610039C10Rik,Zwilch,Bub1b,Setd8,Cdca2,Lrrcc1,Nedd1,Terf1,Spc25,Anln,Incenp,Spag5,Ndc80,Nuf2,Nsl1,Nek4,Kntc1
GO:0051301	3	cell division	267	0.0182	47	0.0681	2.42558e-15	E	Cdca3,Ncapg2,Cdc25c,Nde1,Cenph,Aurkb,Top2a,Cenpe,Cep110,Haus8,Cdca5,Ncapd2,Prc1,Ccnb1,6720463M24Rik,Cep55,Haus4,Cdc7,Cdca8,F630043A04Rik,Fbxo5,Pik3cb,Smc4,Cdc25b,Haus3,Nek2,Kif11,Ncaph,2610039C10Rik,Zwilch,Bub1b,Cdca7,Setd8,Cdca2,Lrrcc1,Nedd1,Terf1,Spc25,Ccnd3,Anln,Incenp,Spag5,Ndc80,Nuf2,Nsl1,Nek4,Kntc1
GO:0000279	6,5	M phase	284	0.0194	48	0.0696	6.16459e-15	E	Cdca3,Ncapg2,Cdc25c,Nde1,Cenph,Tpx2,Aurkb,Cenpe,Haus8,Mre11a,Espl1,Cdca5,Ncapd2,Tacc3,Ccnb1,6720463M24Rik,Cep55,Lfng,Haus4,Cdca8,Suv39h2,F630043A04Rik,Fbxo5,Smc4,Cdc25b,Haus3,Nek2,Kif11,Ncaph,2610039C10Rik,Zwilch,Bub1b,Setd8,Cdca2,Lrrcc1,Nedd1,Terf1,Spc25,Mnd1,Anln,Incenp,Spag5,Nbn,Ndc80,Nuf2,Nsl1,Nek4,Kntc1
GO:0000278	4	mitotic cell cycle	255	0.0174	45	0.0652	8.73908e-15	E	Cdca3,Ncapg2,Cdc25c,Pkia,Nde1,Cenph,Aurkb,Cenpe,Haus8,Rbbp8,Chek1,Cdca5,Ncapd2,E2f6,Ccnb1,6720463M24Rik,Cep55,Haus4,Cdca8,F630043A04Rik,Fbxo5,Smc4,Cdc25b,Haus3,Nek2,Kif11,Ncaph,2610039C10Rik,Zwilch,Bub1b,Anp32b,Setd8,Cdca2,Lrrcc1,Nedd1,Terf1,Spc25,Anln,Incenp,Spag5,Ndc80,Nuf2,Nsl1,Nek4,Kntc1
GO:0022402	4,3	cell cycle process	377	0.0257	55	0.0797	3.91315e-14	E	Cdca3,Ncapg2,Cdc25c,Pkia,Nde1,Cenph,Tpx2,Aurkb,Cenpe,Haus8,Mre11a,Rbbp8,Espl1,Chek1,Cdca5,Ncapd2,Tacc3,E2f6,Ccnb1,6720463M24Rik,Cep55,Lfng,Haus4,Cdca8,Suv39h2,F630043A04Rik,Fbxo5,Smc4,Cdc25b,Haus3,Nek2,Kif11,Ncaph,2610039C10Rik,Zwilch,Bub1b,Anp32b,Sesn3,Setd8,Cdca2,Lrrcc1,Nedd1,Terf1,Spc25,Mnd1,Anln,Incenp,Spag5,Nbn,Ppm1g,Ndc80,Nuf2,Nsl1,Nek4,Kntc1
GO:0007049	3	cell cycle	640	0.0437	72	0.1043	2.53756e-12	E	Cdca3,Ncapg2,Cdc25c,Pkia,Nde1,Cenph,Tpx2,Psrc1,Aurkb,Dlgap5,Chek2,Cenpe,Cep110,Haus8,Mre11a,Rbbp8,Espl1,Chek1,Cdca5,Ncapd2,Prc1,Tacc3,E2f6,Ccnb1,6720463M24Rik,Cep55,Lfng,Haus4,Cdc7,Cdca8,Suv39h2,Txnip,F630043A04Rik,Fbxo5,Sass6,Smc4,Uhrf2,Cdc25b,Haus3,Nek2,Kif11,Ncaph,2610039C10Rik,Zwilch,Bub1b,Anp32b,Sesn3,Setd8,Cdca2,Rcbtb1,Lrrcc1,Nedd1,Terf1,Spc25,Rb1cc1,Mnd1,Ccnd3,Anln,Calm3,Incenp,Spag5,Nbn,P…
GO:0006259	6,5	DNA metabolic process	388	0.0265	41	0.0594	6.58362e-07	E	Rad1,Rad54l,Xrcc2,Top2a,Ppfibp2,Xpa,Mre11a,Nfib,Rpain,Gins3,Chek1,Pms1,Ctcf,Nsmce2,Tinf2,Swap70,0610007P08Rik,Rfc4,Rad52,Eme1,Rad51l1,Nfix,Cebpg,Rad51l3,Terf1,Prim1,Aptx,Rrm2,Mnd1,Dnase2b,Tdg,Rfc3,Neil3,Gins1,Bard1,Nbn,Brip1,Polq,Zswim7,Lin9,Rad54b
GO:0006996	3	organelle organization	1002	0.0684	78	0.113	3.06775e-06	E	Cdca3,Cnn2,Ncapg2,Cdc25c,Scin,Nde1,Cenph,Tpx2,Cln5,Psrc1,Rad54l,Hdac9,H2afv,Aurkb,Top2a,l7Rn6,Cenpe,Map3k1,Haus8,Unc13a,Espl1,Scp2,Vav3,Eed,Mtx2,Cdca5,Ncapd2,Tinf2,Tacc3,Yeats4,Ccnb1,6720463M24Rik,Cep55,Dlc1,Haus4,Cdca8,Suv39h2,F630043A04Rik,Fbxo5,P2rx7,Atp7a,Smc4,Hist1h2ab,Cdc25b,Haus3,Nek2,Chd7,Cebpg,Kif11,Ncaph,2610039C10Rik,Zwilch,Bub1b,Padi4,Pex13,Setd8,Map6d1,Cdca2,Dock2,Rcbtb1,Lrrcc1,Nedd1…
GO:0006281	7,6	DNA repair	213	0.0145	24	0.0348	4.30259e-05	E	Rad1,Rad54l,Xrcc2,Xpa,Mre11a,Rpain,Chek1,Pms1,Nsmce2,0610007P08Rik,Rad52,Eme1,Rad51l1,Cebpg,Rad51l3,Aptx,Tdg,Neil3,Bard1,Nbn,Brip1,Polq,Zswim7,Rad54b
GO:0034984	5	cellular response to DNA damage stimulus	243	0.0166	26	0.0377	5.03321e-05	E	Rad1,Rad54l,Xrcc2,Chek2,Xpa,Mre11a,Rpain,Chek1,Pms1,Nsmce2,0610007P08Rik,Rad52,Eme1,Rad51l1,Uaca,Cebpg,Rad51l3,Aptx,Tdg,Neil3,Bard1,Nbn,Brip1,Polq,Zswim7,Rad54b
GO:0006974	4	response to DNA damage stimulus	273	0.0186	28	0.0406	5.54067e-05	E	Rad1,Rad54l,Xrcc2,Sgk1,Chek2,Xpa,Mre11a,Rpain,Btg2,Chek1,Pms1,Nsmce2,0610007P08Rik,Rad52,Eme1,Rad51l1,Uaca,Cebpg,Rad51l3,Aptx,Tdg,Neil3,Bard1,Nbn,Brip1,Polq,Zswim7,Rad54b
GO:0042421	8,9	norepinephrine biosynthetic process	3	0.0002	3	0.0043	0.0001039	E	Dbh,Atp7a,Gata3
GO:0001505	4,6,7	regulation of neurotransmitter levels	67	0.0046	11	0.0159	0.0002086	E	Aldh5a1,Sv2b,Th,Naalad2,Syt1,Cacna1b,P2rx7,Ache,Prima1,Cplx1,Chrna3
GO:0033554	4	cellular response to stress	376	0.0256	33	0.0478	0.0002308	E	Rad1,Rad54l,Xrcc2,Nrbp1,Chek2,Xpa,Map3k1,Mre11a,Rpain,Chek1,Dusp19,Pms1,Nsmce2,0610007P08Rik,Tlr3,Rad52,Eme1,Ppp1r15a,Rad51l1,Uaca,Myd88,Cebpg,Rad51l3,Aptx,Rb1cc1,Tdg,Neil3,Bard1,Nbn,Brip1,Polq,Zswim7,Rad54b
GO:0016043	2	cellular component organization	1801	0.1229	112	0.1623	0.0003368	E	Cdca3,Cnn2,Ncapg2,Etv1,Cdc25c,Foxd1,Scin,Nde1,Cenph,Tpx2,Cln5,Psrc1,Dclk1,Rad54l,Hdac9,H2afv,Aurkb,Lipa,Lrp1,Nrp1,Cep57,Top2a,l7Rn6,Cenpe,Map3k1,Haus8,Slit2,Unc13a,Slit1,Espl1,Scp2,Vav3,Eed,Mtx2,Cdca5,Ncapd2,Tinf2,Tacc3,Tgfb3,Yeats4,Smn1,Rufy1,Ccnb1,6720463M24Rik,Cep55,Dlc1,Haus4,Cdca8,Gemin6,Suv39h2,F630043A04Rik,Fbxo5,P2rx7,Slit3,Atp7a,Smc4,Ache,Ift172,Hist1h2ab,Cdc25b,Haus3,Nek2,Chd7,Cebpg,Dyn…
GO:0007017	3	microtubule-based process	174	0.0119	19	0.0275	0.0003514	E	Kif18a,Nde1,Tpx2,Psrc1,Dnahc17,Cenpe,Kif20a,Kif2c,Espl1,Tacc3,Fbxo5,Kif15,Kif11,Pex13,Map6d1,Nedd1,Tube1,Kif4,Nuf2
GO:0051716	3	cellular response to stimulus	468	0.0319	38	0.0551	0.0003674	E	Rad1,Rad54l,Xrcc2,Nrbp1,Sgk1,Chek2,Xpa,Map3k1,Mre11a,Rpain,Chek1,Dusp19,Pms1,Nsmce2,0610007P08Rik,Tlr3,Rad52,Eme1,Ppp1r15a,Rad51l1,Uaca,P2rx7,Myd88,Cebpg,Rad51l3,Adipor2,Aptx,Rb1cc1,Tdg,Neil3,Itga1,Bard1,Nbn,Brip1,Ptpn2,Polq,Zswim7,Rad54b
GO:0030261	4,5	chromosome condensation	15	0.001	5	0.0072	0.0004239	E	Ncapg2,Top2a,Ncapd2,Smc4,Ncaph
GO:0042135	6,8,9,5	neurotransmitter catabolic process	9	0.0006	4	0.0058	0.0004826	E	Aldh5a1,Naalad2,Ache,Prima1
GO:0006310	7,6	DNA recombination	86	0.0059	12	0.0174	0.0004903	E	Rad54l,Xrcc2,Rpain,Nsmce2,Swap70,Rad52,Eme1,Rad51l1,Rad51l3,Mnd1,Zswim7,Rad54b
GO:0045184	3,4,5	establishment of protein localization	658	0.0449	48	0.0696	0.0007097	E	Kif18a,Pkia,Ap4m1,Rhob,Sv2b,Bcap31,Arf2,Cep57,Nup43,Cenpe,Rab32,1700034H14Rik,Gabarapl2,Kif20a,Napb,Rpain,Gle1,Uevld,Mtx2,Ap3d1,Tacc3,Ccdc91,Nsf,Rufy1,Sec61b,Mcfd2,Arf5,Uaca,P2rx7,Arntl,Snx5,Tmem48,Stx18,Nup54,Pex13,Atg10,Nedd1,Gnptab,Rab3ip,Nxt2,Cog2,Mrpl45,Folr1,Rab30,Copz2,Ddx19a,Vps37a,Appbp2
GO:0008152	2	metabolic process	7146	0.4875	370	0.5362	0.0009965	E	Man1c1,Aldh5a1,Cyp39a1,Cdca3,Rbm39,Ube2l3,Klhl13,Srd5a1,Etv1,Cdc25c,Pkia,Foxd1,Nfatc2ip,Fkbp14,Akr1e1,Ptgr1,Scin,Blvrb,Tgif1,Tbx20,Gba2,Rdh9,Hsd17b4,Lin54,Adh5,2210012G02Rik,Zadh2,Osgep,Cryz,Psrc1,Usp11,Rps12,Hectd2,Cpvl,Fuca2,Dhtkd1,Ctps,Txnrd1,Rad1,Sv2b,Dclk1,Casp8,Rad54l,Nufip1,Hdac9,Fbxo7,Eif2c4,Aurkb,Lipa,Xrcc2,Impdh2,A130010J15Rik,Pctp,Srxn1,Nrbp1,Zcchc12,Pip4k2a,Tph1,Mkl2,Prkag2,Bmpr2,Renb…
GO:0042133	5,7,8,4	neurotransmitter metabolic process	18	0.0012	5	0.0072	0.0010476	E	Aldh5a1,Th,Naalad2,Ache,Prima1
GO:0000724	9,8	double-strand break repair via homologous recombination	11	0.0008	4	0.0058	0.0011485	E	Rad54l,Xrcc2,Rad52,Rad54b
GO:0042423	7,8	catecholamine biosynthetic process	11	0.0008	4	0.0058	0.0011485	E	Dbh,Th,Atp7a,Gata3
GO:0000725	8,7	recombinational repair	11	0.0008	4	0.0058	0.0011485	E	Rad54l,Xrcc2,Rad52,Rad54b
GO:0007059	3	chromosome segregation	38	0.0026	7	0.0101	0.0014266	E	Cenph,Top2a,Cenpe,Espl1,Nek2,Nuf2,Nsl1
GO:0008104	4	protein localization	756	0.0516	52	0.0754	0.0014476	E	Kif18a,Pkia,Ap4m1,Rhob,Sv2b,Bcap31,Arf2,Cep57,Sgk1,Nup43,Cenpe,Rab32,1700034H14Rik,Gabarapl2,Kif20a,Napb,Rpain,Gle1,Uevld,Mtx2,Ap3d1,Akap10,Tacc3,Ccdc91,Nsf,Rufy1,Sec61b,Mcfd2,Arf5,Uaca,P2rx7,Arntl,Snx5,Tmem48,Stx18,Nup54,Pex13,Atg10,Nedd1,Gnptab,Rab3ip,Nxt2,Cog2,Tln1,Nuf2,Mrpl45,Folr1,Rab30,Copz2,Ddx19a,Vps37a,Appbp2
GO:0015031	4,5,6	protein transport	651	0.0444	46	0.0667	0.0015409	E	Kif18a,Pkia,Ap4m1,Rhob,Sv2b,Bcap31,Arf2,Cep57,Nup43,Rab32,1700034H14Rik,Gabarapl2,Kif20a,Napb,Rpain,Gle1,Uevld,Mtx2,Ap3d1,Tacc3,Ccdc91,Nsf,Rufy1,Sec61b,Mcfd2,Arf5,Uaca,P2rx7,Arntl,Snx5,Tmem48,Stx18,Nup54,Pex13,Atg10,Gnptab,Rab3ip,Nxt2,Cog2,Mrpl45,Folr1,Rab30,Copz2,Ddx19a,Vps37a,Appbp2
GO:0042401	7,6	biogenic amine biosynthetic process	29	0.002	6	0.0087	0.0016838	E	Tph1,Etnk2,Dbh,Th,Atp7a,Gata3
GO:0000226	5,4	microtubule cytoskeleton organization	87	0.0059	11	0.0159	0.0017521	E	Nde1,Tpx2,Psrc1,Cenpe,Espl1,Tacc3,Fbxo5,Kif11,Map6d1,Nedd1,Nuf2
GO:0018198	9,8	peptidyl-cysteine modification	6	0.0004	3	0.0043	0.0017985	E	Adh5,Nos1,Map6d1
GO:0042308	8,7,9,10,11,6,5	negative regulation of protein import into nucleus	6	0.0004	3	0.0043	0.0017985	E	Pkia,Tacc3,Uaca
GO:0009615	4,5	response to virus	63	0.0043	9	0.013	0.0019444	E	Abcc9,Tlr3,Myd88,Zc3hav1,Oas1b,Plscr1,Irak3,Ifna14,Fv1
GO:0033036	3	macromolecule localization	791	0.054	53	0.0768	0.0021411	E	Kif18a,Pkia,Ap4m1,Rhob,Sv2b,Bcap31,Arf2,Cep57,Sgk1,Nup43,Cenpe,Rab32,1700034H14Rik,Gabarapl2,Kif20a,Napb,Rpain,Gle1,Uevld,Mtx2,Ap3d1,Akap10,Tacc3,Ccdc91,Nsf,Chst11,Rufy1,Sec61b,Mcfd2,Arf5,Uaca,P2rx7,Arntl,Snx5,Tmem48,Stx18,Nup54,Pex13,Atg10,Nedd1,Gnptab,Rab3ip,Nxt2,Cog2,Tln1,Nuf2,Mrpl45,Folr1,Rab30,Copz2,Ddx19a,Vps37a,Appbp2
GO:0006470	9,7,8	protein amino acid dephosphorylation	103	0.007	12	0.0174	0.0021805	E	Cdc25c,Ptprr,Dusp19,Ppap2a,Ptpn21,Cdc25b,Ptprn,Ptpn7,Ppm1g,Ptpn2,Styx,Ptpre
GO:0007185	8,7	transmembrane receptor protein tyrosine phosphatase signaling pathway	2	0.0001	2	0.0029	0.0022125	E	Ptprn,Ptpre
GO:0006678	8,10,9,11	glucosylceramide metabolic process	2	0.0001	2	0.0029	0.0022125	E	Aldh5a1,Gba2
GO:0018119	10,9	peptidyl-cysteine S-nitrosylation	2	0.0001	2	0.0029	0.0022125	E	Adh5,Nos1
GO:0044271	5	nitrogen compound biosynthetic process	92	0.0063	11	0.0159	0.002649	E	Tph1,Nos1,Etnk2,Dbh,Th,Atp7a,Got2,Padi4,Mri1,H60a,Gata3
GO:0044237	3	cellular metabolic process	6119	0.4174	316	0.458	0.002752	E	Man1c1,Aldh5a1,Cyp39a1,Cdca3,Rbm39,Ube2l3,Klhl13,Srd5a1,Etv1,Cdc25c,Pkia,Foxd1,Nfatc2ip,Fkbp14,Scin,Blvrb,Tgif1,Tbx20,Gba2,Rdh9,Hsd17b4,Lin54,Adh5,2210012G02Rik,Psrc1,Usp11,Rps12,Hectd2,Fuca2,Dhtkd1,Ctps,Rad1,Dclk1,Rad54l,Nufip1,Hdac9,Fbxo7,Eif2c4,Aurkb,Xrcc2,Impdh2,A130010J15Rik,Pctp,Nrbp1,Zcchc12,Pip4k2a,Tph1,Mkl2,Prkag2,Bmpr2,Renbp,Ptprr,Zfp280d,Nos1,Kcnip3,Ufd1l,Acadl,Sgk1,Zfp512,Top2a,Polr1d…
GO:0006950	3	response to stress	1086	0.0741	68	0.0986	0.002897	E	Adh5,Rad1,Rad54l,P2rx3,Hdac9,Lipa,Xrcc2,F2rl2,Srxn1,Nrbp1,Prkag2,Kcnip3,Sgk1,Chek2,Glp1r,Xpa,Dbh,Mst1,Cirbp,Map3k1,Mre11a,Cnr2,Ly96,Ptgs1,Rpain,Btg2,Chek1,Il1rap,Dusp19,Pms1,Nsmce2,Tacc3,0610007P08Rik,Gja1,Abcc9,Tlr3,F13a1,Rad52,Eme1,Ppp1r15a,Rad51l1,Uaca,Txnip,P2rx7,Pik3cb,Nqo1,Edem3,Myd88,Cebpg,Scn9a,Saal1,Rad51l3,Syt7,Aptx,Rb1cc1,Tdg,Neil3,H60a,Cd1d1,Bard1,Irak3,Nbn,Brip1,Polq,Zswim7,Cxcl10,Co…
GO:0046823	7,8,9,6,5	negative regulation of nucleocytoplasmic transport	7	0.0005	3	0.0043	0.0029998	E	Pkia,Tacc3,Uaca
GO:0042415	7,8	norepinephrine metabolic process	7	0.0005	3	0.0043	0.0029998	E	Dbh,Atp7a,Gata3
GO:0032387	6,7,5,4	negative regulation of intracellular transport	7	0.0005	3	0.0043	0.0029998	E	Pkia,Tacc3,Uaca
GO:0035094	6	response to nicotine	7	0.0005	3	0.0043	0.0029998	E	Chrna3,Chrnb4,Chrna5
GO:0042398	6,5	cellular amino acid derivative biosynthetic process	33	0.0023	6	0.0087	0.0032416	E	Tph1,Etnk2,Dbh,Th,Atp7a,Gata3
GO:0007368	7,6	determination of left/right symmetry	44	0.003	7	0.0101	0.0032507	E	Tgif1,Rttn,Stil,Ift172,Dync2li1,Arl13b,Pcsk6
GO:0009799	5,4	determination of symmetry	45	0.0031	7	0.0101	0.0036696	E	Tgif1,Rttn,Stil,Ift172,Dync2li1,Arl13b,Pcsk6
GO:0009855	6,5	determination of bilateral symmetry	45	0.0031	7	0.0101	0.0036696	E	Tgif1,Rttn,Stil,Ift172,Dync2li1,Arl13b,Pcsk6
GO:0001947	7,8,6	heart looping	24	0.0016	5	0.0072	0.0038982	E	Tbx20,Gja1,Stil,Srf,Lbx1
GO:0055114	3	oxidation reduction	635	0.0433	43	0.0623	0.0039124	E	Aldh5a1,Cyp39a1,Srd5a1,Akr1e1,Ptgr1,Blvrb,Rdh9,Hsd17b4,Adh5,Zadh2,Cryz,Dhtkd1,Txnrd1,Impdh2,Srxn1,Tph1,Nos1,Acadl,Cbr3,Dbh,Sqle,Sqrdl,Ptgs1,Th,P4ha3,Ado,Glud1,Pam,Sc5d,Mosc2,Nqo1,Akr1b8,Sc4mol,Kcnab1,Rrm2,Nsdhl,Phyhd1,Wwox,Leprel2,Alox15,Ndufv3,Aldh2,Decr1
GO:0043412	5	biopolymer modification	1238	0.0845	75	0.1087	0.0039129	E	Ube2l3,Cdc25c,Adh5,Hectd2,Dclk1,Aurkb,Nrbp1,Bmpr2,Ptprr,Nos1,Sgk1,Chek2,Melk,Mst1r,Map3k1,Btg2,Ttk,Uevld,Chek1,Dusp19,Eed,Hhat,Ksr2,Ppap2a,Gclc,Ptpn21,Ctcf,Nsmce2,Lipt1,B3galnt1,Ube4a,Ccnb1,F13a1,Qtrtd1,Cdc7,Suv39h2,Stk17b,Prkd2,P2rx7,Opn3,Fut10,Atp7a,Uhrf2,Cdc25b,Pask,Nek2,Adrbk2,Scyl3,Ptprn,Bub1b,Mettl1,Frs2,Ptpn7,Padi4,Ick,Map6d1,B3galt2,Atg10,Rb1cc1,Pigl,Smurf2,Mapkapk2,Irak3,Ube2f,Ppm1g,Usp2…
GO:0016311	6	dephosphorylation	127	0.0087	13	0.0188	0.0042208	E	Cdc25c,Ptprr,Mtmr11,Dusp19,Ppap2a,Ptpn21,Cdc25b,Ptprn,Ptpn7,Ppm1g,Ptpn2,Styx,Ptpre
GO:0000578	5,6	embryonic axis specification	8	0.0005	3	0.0043	0.0045746	E	Stil,Frs2,Pcsk6
GO:0007018	4	microtubule-based movement	86	0.0059	10	0.0145	0.0047476	E	Kif18a,Nde1,Dnahc17,Cenpe,Kif20a,Kif2c,Kif15,Kif11,Tube1,Kif4
GO:0034960	5	cellular biopolymer metabolic process	4682	0.3194	244	0.3536	0.004782	E	Man1c1,Cdca3,Rbm39,Ube2l3,Klhl13,Etv1,Cdc25c,Pkia,Foxd1,Nfatc2ip,Fkbp14,Scin,Tgif1,Tbx20,Lin54,Adh5,2210012G02Rik,Psrc1,Usp11,Rps12,Hectd2,Rad1,Dclk1,Rad54l,Nufip1,Hdac9,Fbxo7,Eif2c4,Aurkb,Xrcc2,A130010J15Rik,Nrbp1,Zcchc12,Mkl2,Bmpr2,Ptprr,Zfp280d,Nos1,Kcnip3,Ufd1l,Sgk1,Zfp512,Top2a,Polr1d,Ppp1r10,Usp49,Chek2,Melk,Ppfibp2,Dda1,Xpa,Mst1r,Map3k1,Gabpb2,Mre11a,Rest,Nfib,Usp3,Rpp14,Zfp9,Rpain,Btg2,Tt…
GO:0006464	7,6	protein modification process	1195	0.0815	72	0.1043	0.0049239	E	Ube2l3,Cdc25c,Adh5,Hectd2,Dclk1,Aurkb,Nrbp1,Bmpr2,Ptprr,Nos1,Sgk1,Chek2,Melk,Mst1r,Map3k1,Btg2,Ttk,Uevld,Chek1,Dusp19,Eed,Hhat,Ksr2,Ppap2a,Gclc,Ptpn21,Nsmce2,Lipt1,B3galnt1,Ube4a,Ccnb1,F13a1,Cdc7,Suv39h2,Stk17b,Prkd2,P2rx7,Opn3,Fut10,Atp7a,Uhrf2,Cdc25b,Pask,Nek2,Adrbk2,Scyl3,Ptprn,Bub1b,Frs2,Ptpn7,Padi4,Ick,Map6d1,B3galt2,Atg10,Rb1cc1,Pigl,Smurf2,Mapkapk2,Irak3,Ube2f,Ppm1g,Usp21,Hs3st3b1,Prkg1,Pt…
GO:0008543	9,8	fibroblast growth factor receptor signaling pathway	16	0.0011	4	0.0058	0.0049831	E	Cep57,Fgf17,Frs2,Ngfr
GO:0007051	6,7,5	spindle organization	16	0.0011	4	0.0058	0.0049831	E	Tpx2,Espl1,Tacc3,Fbxo5
GO:0051641	3	cellular localization	666	0.0454	44	0.0638	0.0051591	E	Pkia,Ap4m1,Nde1,Sv2b,Bcap31,Cep57,Nup43,Cenpe,1700034H14Rik,Gabarapl2,Napb,Unc13a,Rpain,Gle1,Slit1,Cplx2,Mtx2,Ap3d1,Tacc3,Syt1,Sec61b,Glud1,Gpr119,Cacna1b,Uaca,P2rx7,Prima1,Arntl,Tmem48,Stx18,Cplx1,Fam3b,Nup54,Pex13,Dock2,Chrna3,Gnptab,Tln1,Nuf2,Mrpl45,Folr1,Copz2,Ddx19a,Appbp2
GO:0009987	2	cellular process	11167	0.7618	547	0.7928	0.0053273	E	Man1c1,Aldh5a1,Cyp39a1,Cdca3,Rbm39,Ube2l3,Klhl13,Srd5a1,Fat3,Lphn1,Cnn2,Ncapg2,Kif18a,Etv1,Cdc25c,Pkia,Foxd1,Nfatc2ip,Fkbp14,Npy,Scin,Blvrb,Ap4m1,Tgif1,Tbx20,Gba2,Rdh9,Nde1,Hsd17b4,Lin54,Cenph,Adh5,2210012G02Rik,Tpx2,Nsg1,Rhob,Cln5,Psrc1,Usp11,Rps12,Angpt2,Hectd2,Fuca2,Dhtkd1,Ctps,Txnrd1,Rhebl1,Rad1,Sv2b,Micalcl,Dclk1,Casp8,Rad54l,Nufip1,P2rx3,Hdac9,H2afv,Fbxo7,Bcap31,Eif2c4,Gpr124,Aurkb,Lipa,Xrc…
GO:0007268	5,6	synaptic transmission	194	0.0132	17	0.0246	0.005534	E	Aldh5a1,Sv2b,P2rx3,Tmod2,Th,Naalad2,Syt1,Cacna1b,P2rx7,Ache,Prima1,Cplx1,Chrna3,Slc24a2,Nlgn2,Chrnb4,Ncan
GO:0044260	4	cellular macromolecule metabolic process	4788	0.3266	248	0.3594	0.0056767	E	Man1c1,Cdca3,Rbm39,Ube2l3,Klhl13,Etv1,Cdc25c,Pkia,Foxd1,Nfatc2ip,Fkbp14,Scin,Tgif1,Tbx20,Lin54,Adh5,2210012G02Rik,Psrc1,Usp11,Rps12,Hectd2,Dhtkd1,Rad1,Dclk1,Rad54l,Nufip1,Hdac9,Fbxo7,Eif2c4,Aurkb,Xrcc2,A130010J15Rik,Nrbp1,Zcchc12,Mkl2,Bmpr2,Ptprr,Zfp280d,Nos1,Kcnip3,Ufd1l,Sgk1,Zfp512,Top2a,Polr1d,Ppp1r10,Usp49,Chek2,Melk,Ppfibp2,Dda1,Xpa,Mst1r,Map3k1,Gabpb2,Mre11a,Rest,Nfib,Usp3,Rpp14,Unc13a,Zfp9…
GO:0031109	6,5	microtubule polymerization or depolymerization	17	0.0012	4	0.0058	0.0062111	E	Psrc1,Fbxo5,Map6d1,Nedd1
GO:0032507	6,5,4	maintenance of protein location in cell	17	0.0012	4	0.0058	0.0062111	E	Cenpe,Tacc3,Tln1,Nuf2
GO:0003013	4	circulatory system process	119	0.0081	12	0.0174	0.0063052	E	Npy,Tbx20,Adh5,Glp1r,Dbh,Ptgs1,Th,Gja1,Cacna1b,Chd7,Ace,Cacna1g
GO:0008015	5	blood circulation	119	0.0081	12	0.0174	0.0063052	E	Npy,Tbx20,Adh5,Glp1r,Dbh,Ptgs1,Th,Gja1,Cacna1b,Chd7,Ace,Cacna1g
GO:0008608	9,8,5,7	attachment of spindle microtubules to kinetochore	3	0.0002	2	0.0029	0.006326	E	Cenpe,Nuf2
GO:0051900	5,11,6,9,4	regulation of mitochondrial depolarization	3	0.0002	2	0.0029	0.006326	E	Gclc,P2rx7
GO:0021860	10,11,9,8,12,7	pyramidal neuron development	3	0.0002	2	0.0029	0.006326	E	Atp7a,Plxna3
GO:0048007	5,6	antigen processing and presentation, exogenous lipid antigen via MHC class Ib	3	0.0002	2	0.0029	0.006326	E	Ap3d1,Cd1d1
GO:0048003	5	antigen processing and presentation of lipid antigen via MHC class Ib	3	0.0002	2	0.0029	0.006326	E	Ap3d1,Cd1d1
GO:0021859	8,9,6	pyramidal neuron differentiation	3	0.0002	2	0.0029	0.006326	E	Atp7a,Plxna3
GO:0051313	8,7,4,6	attachment of spindle microtubules to chromosome	3	0.0002	2	0.0029	0.006326	E	Cenpe,Nuf2
GO:0017014	9,8	protein amino acid nitrosylation	3	0.0002	2	0.0029	0.006326	E	Adh5,Nos1
GO:0051882	10,8	mitochondrial depolarization	3	0.0002	2	0.0029	0.006326	E	Gclc,P2rx7
GO:0060084	7,8,6	synaptic transmission involved in micturition	3	0.0002	2	0.0029	0.006326	E	Chrna3,Chrnb4
GO:0006302	8,7	double-strand break repair	27	0.0018	5	0.0072	0.0064123	E	Rad54l,Xrcc2,Mre11a,Rad52,Rad54b
GO:0043086	5	negative regulation of catalytic activity	77	0.0053	9	0.013	0.0067872	E	Pkia,Nos1,Dusp19,Fbxo5,Atp7a,Nqo1,Irak3,Il7,Trib3
GO:0043687	8,7	post-translational protein modification	1006	0.0686	61	0.0884	0.0070802	E	Ube2l3,Cdc25c,Adh5,Dclk1,Aurkb,Nrbp1,Bmpr2,Ptprr,Nos1,Sgk1,Chek2,Melk,Mst1r,Map3k1,Btg2,Ttk,Uevld,Chek1,Dusp19,Eed,Ksr2,Ppap2a,Gclc,Ptpn21,Nsmce2,Lipt1,Ube4a,Ccnb1,F13a1,Cdc7,Suv39h2,Stk17b,Prkd2,P2rx7,Opn3,Uhrf2,Cdc25b,Pask,Nek2,Adrbk2,Scyl3,Ptprn,Bub1b,Frs2,Ptpn7,Ick,Rb1cc1,Mapkapk2,Irak3,Ube2f,Ppm1g,Usp21,Hs3st3b1,Prkg1,Ptpn2,Phkg2,Styx,Nek4,Acvr1b,Trib3,Ptpre
GO:0006811	4,5	ion transport	682	0.0465	44	0.0638	0.0071242	E	Tmem38b,P2rx3,Trpc7,Nos1,Kcnip3,Sgk1,Accn2,Slc26a2,Hcn2,Htr3b,Kcnk5,Cacna2d4,Nsf,Abcc9,Htr3a,Cnnm3,Atp1b1,Scn1a,Cacna1b,Ttyh2,P2rx7,Atp7a,Vdr,Cnga3,Scn9a,Kcnab1,Fxyd1,Atp2b4,Kcnn3,Chrna3,Vdac2,Slc24a2,Fxyd5,Cacna1g,Kctd3,Mmgt1,Tcn2,Slc41a2,Chrnb4,Sfxn4,Slc22a21,Chrna5,Kctd2,Cacna1i
GO:0051179	2	localization	2671	0.1822	144	0.2087	0.0073845	E	Kif18a,Etv1,Pkia,Foxd1,Ap4m1,Tmem38b,Nde1,Rhob,Sv2b,Dclk1,P2rx3,Bcap31,Pctp,Lrp1,Arf2,Nrp1,Trpc7,Nos1,Kcnip3,Cep57,Sgk1,Accn2,Abca2,Nup43,Cenpe,Rab32,Slc35a2,1700034H14Rik,Slc26a2,Dbh,Gabarapl2,Kif20a,Map3k1,Napb,Pltp,Slit2,Unc13a,Rpain,Gle1,Uevld,Slit1,Cplx2,Scp2,Vav3,Mtx2,Hcn2,Htr3b,Kcnk5,Golim4,Ap3d1,Akap10,Cacna2d4,Tacc3,Ccdc91,Nsf,Slc45a1,Chst11,Gja1,Abcc9,Rufy1,Slc7a3,Htr3a,Syt1,Cnnm3,Sec61…
GO:0048265	4,5	response to pain	18	0.0012	4	0.0058	0.0076116	E	P2rx3,Kcnip3,Dbh,Scn9a
GO:0043283	4	biopolymer metabolic process	5146	0.351	263	0.3812	0.0077148	E	Man1c1,Cdca3,Rbm39,Ube2l3,Klhl13,Etv1,Cdc25c,Pkia,Foxd1,Nfatc2ip,Fkbp14,Scin,Tgif1,Tbx20,Lin54,Adh5,2210012G02Rik,Osgep,Psrc1,Usp11,Rps12,Hectd2,Cpvl,Rad1,Sv2b,Dclk1,Casp8,Rad54l,Nufip1,Hdac9,Fbxo7,Eif2c4,Aurkb,Xrcc2,A130010J15Rik,Nrbp1,Zcchc12,Mkl2,Bmpr2,Ptprr,Lnpep,Zfp280d,Nos1,Kcnip3,Ufd1l,Sgk1,Zfp512,Top2a,Polr1d,Ppp1r10,Usp49,Chek2,Melk,Ppfibp2,Dda1,Xpa,Psmc2,Mst1,Mst1r,Map3k1,Gabpb2,Mre11a,…
GO:0044238	3	primary metabolic process	6264	0.4273	316	0.458	0.0078307	E	Man1c1,Aldh5a1,Cyp39a1,Cdca3,Rbm39,Ube2l3,Klhl13,Srd5a1,Etv1,Cdc25c,Pkia,Foxd1,Nfatc2ip,Fkbp14,Scin,Tgif1,Tbx20,Gba2,Hsd17b4,Lin54,Adh5,2210012G02Rik,Osgep,Psrc1,Usp11,Rps12,Hectd2,Cpvl,Fuca2,Dhtkd1,Ctps,Rad1,Sv2b,Dclk1,Casp8,Rad54l,Nufip1,Hdac9,Fbxo7,Eif2c4,Aurkb,Lipa,Xrcc2,Impdh2,A130010J15Rik,Pctp,Nrbp1,Zcchc12,Pip4k2a,Tph1,Mkl2,Prkag2,Bmpr2,Renbp,Ptprr,Lnpep,Zfp280d,Nos1,Kcnip3,Ufd1l,Acadl,Sg…
GO:0006886	6,5,7	intracellular protein transport	305	0.0208	23	0.0333	0.008076	E	Pkia,Ap4m1,Bcap31,Cep57,Nup43,1700034H14Rik,Napb,Rpain,Gle1,Mtx2,Ap3d1,Tacc3,Sec61b,Uaca,Arntl,Tmem48,Stx18,Nup54,Pex13,Mrpl45,Folr1,Copz2,Ddx19a
GO:0051234	2,3	establishment of localization	2276	0.1553	124	0.1797	0.0083035	E	Kif18a,Pkia,Ap4m1,Tmem38b,Nde1,Rhob,Sv2b,P2rx3,Bcap31,Pctp,Lrp1,Arf2,Trpc7,Nos1,Kcnip3,Cep57,Sgk1,Accn2,Abca2,Nup43,Cenpe,Rab32,Slc35a2,1700034H14Rik,Slc26a2,Gabarapl2,Kif20a,Napb,Pltp,Unc13a,Rpain,Gle1,Uevld,Slit1,Cplx2,Scp2,Vav3,Mtx2,Hcn2,Htr3b,Kcnk5,Golim4,Ap3d1,Cacna2d4,Tacc3,Ccdc91,Nsf,Slc45a1,Abcc9,Rufy1,Slc7a3,Htr3a,Syt1,Cnnm3,Sec61b,Mcfd2,Atp1b1,Scn1a,Glud1,Gpr119,Abcd1,Cacna1b,Ttyh2,Arf5…
GO:0008033	9,8,7	tRNA processing	66	0.0045	8	0.0116	0.0083401	E	Rpp14,Qtrtd1,Adat2,Trpt1,Rpp40,Mettl1,Trit1,Rpp21
GO:0009880	4,5	embryonic pattern specification	53	0.0036	7	0.0101	0.0084985	E	Tbx20,Nrp1,Stil,Frs2,Plxnd1,Mllt3,Pcsk6
GO:0050790	4	regulation of catalytic activity	360	0.0246	26	0.0377	0.0086024	E	Pkia,Nos1,Cenpe,Map3k1,Vav3,Dusp19,Wdr67,Ceacam1,Arhgap1,Gnas,Uaca,Tshr,Adcy6,Fbxo5,P2rx7,Atp7a,Nqo1,Cdc25b,Aph1b,Vdr,Frs2,Chrna3,Tbc1d9,Irak3,Il7,Trib3
GO:0044092	4	negative regulation of molecular function	95	0.0065	10	0.0145	0.0088117	E	Pkia,Nos1,Dusp19,Fbxo5,Atp7a,Nqo1,Cebpg,Irak3,Il7,Trib3
GO:0006013	7,8	mannose metabolic process	10	0.0007	3	0.0043	0.008905	E	Man1c1,Renbp,Gmds
GO:0008283	3	cell proliferation	622	0.0424	40	0.058	0.0095424	E	Ncapg2,Tgif1,Tbx20,Nde1,Txnrd1,Lipa,Impdh2,AY036118,Dbh,Nfib,Rtkn2,Ptgs1,Tacc3,Fbxw4,Tgfb3,Fgf17,Ifitm3,Chst11,Il11ra1,Pax3,P2rx7,Uhrf2,Myd88,Cdca7l,Mitf,Cdca7,Frs2,Sat1,Dock2,Ngfr,Lbx1,Ccnd3,Gins1,Ifnar2,Nbn,Il7,Sparc,Cntfr,Appl2,Gata3
GO:0009309	6	amine biosynthetic process	68	0.0046	8	0.0116	0.0097539	E	Tph1,Etnk2,Dbh,Th,Atp7a,Got2,Mri1,Gata3
GO:0003007	6,7,5	heart morphogenesis	68	0.0046	8	0.0116	0.0097539	E	Tbx20,Mkl2,Gja1,Stil,Dlc1,Srf,Chd7,Lbx1
GO:0043170	3	macromolecule metabolic process	5310	0.3622	269	0.3899	0.0097685	E	Man1c1,Cdca3,Rbm39,Ube2l3,Klhl13,Etv1,Cdc25c,Pkia,Foxd1,Nfatc2ip,Fkbp14,Scin,Tgif1,Tbx20,Lin54,Adh5,2210012G02Rik,Osgep,Psrc1,Usp11,Rps12,Hectd2,Cpvl,Dhtkd1,Rad1,Sv2b,Dclk1,Casp8,Rad54l,Nufip1,Hdac9,Fbxo7,Eif2c4,Aurkb,Xrcc2,A130010J15Rik,Nrbp1,Zcchc12,Mkl2,Bmpr2,Ptprr,Lnpep,Zfp280d,Nos1,Kcnip3,Ufd1l,Sgk1,Zfp512,Top2a,Polr1d,Ppp1r10,Usp49,Chek2,Melk,Ppfibp2,Dda1,Xpa,Psmc2,Mst1,Mst1r,Map3k1,Gabpb2,…
GO:0015674	6,7	di-, tri-valent inorganic cation transport	159	0.0108	14	0.0203	0.0099001	E	Trpc7,Nos1,Accn2,Cacna2d4,Cacna1b,P2rx7,Vdr,Atp2b4,Slc24a2,Cacna1g,Mmgt1,Tcn2,Sfxn4,Cacna1i
GO:0007269	5,6,7,8,4	neurotransmitter secretion	42	0.0029	6	0.0087	0.0099756	E	Sv2b,Syt1,Cacna1b,P2rx7,Cplx1,Chrna3
GO:0065009	3	regulation of molecular function	421	0.0287	29	0.042	0.0102544	E	Pkia,Nos1,Cenpe,Map3k1,Vav3,Dusp19,Wdr67,Ceacam1,Arhgap1,Gnas,Tlr3,Uaca,Tshr,Adcy6,Fbxo5,P2rx7,Atp7a,Nqo1,Myd88,Cdc25b,Cebpg,Aph1b,Vdr,Frs2,Chrna3,Tbc1d9,Irak3,Il7,Trib3
GO:0051649	4,3	establishment of localization in cell	626	0.0427	40	0.058	0.0102867	E	Pkia,Ap4m1,Nde1,Sv2b,Bcap31,Cep57,Nup43,1700034H14Rik,Gabarapl2,Napb,Unc13a,Rpain,Gle1,Slit1,Cplx2,Mtx2,Ap3d1,Tacc3,Syt1,Sec61b,Glud1,Gpr119,Cacna1b,Uaca,P2rx7,Prima1,Arntl,Tmem48,Stx18,Cplx1,Fam3b,Nup54,Pex13,Chrna3,Gnptab,Mrpl45,Folr1,Copz2,Ddx19a,Appbp2
GO:0051651	5,4,3	maintenance of location in cell	20	0.0014	4	0.0058	0.0109488	E	Cenpe,Tacc3,Tln1,Nuf2
GO:0042219	6,5	cellular amino acid derivative catabolic process	20	0.0014	4	0.0058	0.0109488	E	Aldh5a1,Dbh,Ache,Sat1
GO:0006260	7,6	DNA replication	130	0.0089	12	0.0174	0.0113236	E	Nfib,Rpain,Gins3,Rfc4,Nfix,Terf1,Prim1,Rrm2,Rfc3,Gins1,Polq,Lin9
GO:0006807	3	nitrogen compound metabolic process	317	0.0216	23	0.0333	0.0114531	E	Aldh5a1,Ctps,Tph1,Nos1,Etnk2,Dbh,Nit2,Ppap2a,Auh,Th,Chst11,Btd,Ddah2,Glud1,Atp7a,Ache,Got2,Padi4,Sat1,Habp4,Mri1,H60a,Gata3
GO:0051224	6,8,7,5,4	negative regulation of protein transport	11	0.0008	3	0.0043	0.0116701	E	Pkia,Tacc3,Uaca
GO:0006066	4	cellular alcohol metabolic process	283	0.0193	21	0.0304	0.0119426	E	Man1c1,Aldh5a1,Cyp39a1,Adh5,Fuca2,Dhtkd1,Pctp,Renbp,Abca2,Etnk2,Dbh,Uevld,Ppap2a,Th,Sc5d,Atp7a,Sc4mol,Gmds,Nsdhl,Soat1,Gata3
GO:0042992	9,8,10,11,12,7,6	negative regulation of transcription factor import into nucleus	4	0.0003	2	0.0029	0.0120581	E	Tacc3,Uaca
GO:0034453	7,6,5	microtubule anchoring	4	0.0003	2	0.0029	0.0120581	E	Cenpe,Nuf2
GO:0000089	7,9,8,6	mitotic metaphase	4	0.0003	2	0.0029	0.0120581	E	Fbxo5,Ndc80
GO:0006509	9,8	membrane protein ectodomain proteolysis	4	0.0003	2	0.0029	0.0120581	E	P2rx7,Adam19
GO:0048846	8,10,9,5,13,11,14,12,6	axon extension involved in axon guidance	4	0.0003	2	0.0029	0.0120581	E	Nrp1,Plxna3
GO:0048841	9,10,12,6,11,8,5,14,13,15,7	regulation of axon extension involved in axon guidance	4	0.0003	2	0.0029	0.0120581	E	Nrp1,Plxna3
GO:0033619	8,7	membrane protein proteolysis	4	0.0003	2	0.0029	0.0120581	E	P2rx7,Adam19
GO:0048843	9,11,10,13,7,12,8,6,14,15,16	negative regulation of axon extension involved in axon guidance	4	0.0003	2	0.0029	0.0120581	E	Nrp1,Plxna3
GO:0007144	10,8,5,9,7,4	female meiosis I	4	0.0003	2	0.0029	0.0120581	E	Fbxo5,Cdc25b
GO:0019226	5	transmission of nerve impulse	233	0.0159	18	0.0261	0.0128811	E	Aldh5a1,Sv2b,P2rx3,Tmod2,Th,Naalad2,Syt1,Scn1a,Cacna1b,P2rx7,Ache,Prima1,Cplx1,Chrna3,Slc24a2,Nlgn2,Chrnb4,Ncan
GO:0034613	5	cellular protein localization	324	0.0221	23	0.0333	0.0138085	E	Pkia,Ap4m1,Bcap31,Cep57,Nup43,1700034H14Rik,Napb,Rpain,Gle1,Mtx2,Ap3d1,Tacc3,Sec61b,Uaca,Arntl,Tmem48,Stx18,Nup54,Pex13,Mrpl45,Folr1,Copz2,Ddx19a
GO:0001841	5,7,8,10,9,11,6	neural tube formation	59	0.004	7	0.0101	0.0141108	E	Tgif1,Casp8,Fzd3,Stil,Dlc1,Pax3,Ift172
GO:0070727	4	cellular macromolecule localization	326	0.0222	23	0.0333	0.0145348	E	Pkia,Ap4m1,Bcap31,Cep57,Nup43,1700034H14Rik,Napb,Rpain,Gle1,Mtx2,Ap3d1,Tacc3,Sec61b,Uaca,Arntl,Tmem48,Stx18,Nup54,Pex13,Mrpl45,Folr1,Copz2,Ddx19a
GO:0006810	3,4	transport	2263	0.1544	120	0.1739	0.01474	E	Kif18a,Pkia,Ap4m1,Tmem38b,Nde1,Rhob,Sv2b,P2rx3,Bcap31,Pctp,Lrp1,Arf2,Trpc7,Nos1,Kcnip3,Cep57,Sgk1,Accn2,Abca2,Nup43,Rab32,Slc35a2,1700034H14Rik,Slc26a2,Gabarapl2,Kif20a,Napb,Pltp,Unc13a,Rpain,Gle1,Uevld,Cplx2,Scp2,Vav3,Mtx2,Hcn2,Htr3b,Kcnk5,Golim4,Ap3d1,Cacna2d4,Tacc3,Ccdc91,Nsf,Slc45a1,Abcc9,Rufy1,Slc7a3,Htr3a,Syt1,Cnnm3,Sec61b,Mcfd2,Atp1b1,Scn1a,Glud1,Gpr119,Abcd1,Cacna1b,Ttyh2,Arf5,Uaca,P2rx7,…
GO:0000245	7,5,6,10,12,9,11,8	spliceosome assembly	12	0.0008	3	0.0043	0.0148304	E	Smn1,Gemin6,Sip1
GO:0046395	6	carboxylic acid catabolic process	22	0.0015	4	0.0058	0.0150175	E	Aldh5a1,Cyp39a1,Hsd17b4,Pex13
GO:0016054	5	organic acid catabolic process	22	0.0015	4	0.0058	0.0150175	E	Aldh5a1,Cyp39a1,Hsd17b4,Pex13
GO:0048771	3	tissue remodeling	90	0.0061	9	0.013	0.0159522	E	Lipa,Dbh,Gnas,P2rx7,Atp7a,Vdr,Mitf,Enpp1,Il7
GO:0044267	6,5	cellular protein metabolic process	2121	0.1447	112	0.1623	0.0174995	E	Man1c1,Cdca3,Ube2l3,Klhl13,Cdc25c,Fkbp14,Scin,Adh5,Psrc1,Usp11,Rps12,Hectd2,Dclk1,Fbxo7,Eif2c4,Aurkb,Nrbp1,Bmpr2,Ptprr,Nos1,Ufd1l,Sgk1,Usp49,Chek2,Melk,Dda1,Mst1r,Map3k1,Usp3,Btg2,Ttk,Uevld,Ufsp1,Chek1,Rpsa,Dusp19,Eed,Mrrf,Hhat,Ksr2,Ppap2a,Gclc,Ptpn21,Nsmce2,Lipt1,B3galnt1,Fbxw4,Klhl12,Chst11,Rnf167,Ube4a,Ccnb1,F13a1,Cdc7,Ppp1r15a,Suv39h2,Pfdn5,Stk17b,Prkd2,Fbxo5,P2rx7,Eif4a2,Opn3,Fut10,Atp7a,Uhr…
GO:0001838	4,6,7,9,8,10,5	embryonic epithelial tube formation	62	0.0042	7	0.0101	0.0176184	E	Tgif1,Casp8,Fzd3,Stil,Dlc1,Pax3,Ift172
GO:0065002	7,4,6,5,8	intracellular protein transmembrane transport	62	0.0042	7	0.0101	0.0176184	E	Nup43,1700034H14Rik,Gle1,Sec61b,Tmem48,Nup54,Ddx19a
GO:0007267	4	cell-cell signaling	353	0.0241	24	0.0348	0.0178861	E	Aldh5a1,Sv2b,P2rx3,Dlgap5,Tmod2,Th,Naalad2,Gja1,Syt1,Scn1a,Glud1,Gpr119,Cacna1b,P2rx7,Ache,Prima1,Cplx1,Frs2,Fam3b,Chrna3,Slc24a2,Nlgn2,Chrnb4,Ncan
GO:0007143	9,7,8,6	female meiosis	13	0.0009	3	0.0043	0.0183752	E	Lfng,Fbxo5,Cdc25b
GO:0034641	4	cellular nitrogen compound metabolic process	299	0.0204	21	0.0304	0.0184278	E	Aldh5a1,Ctps,Tph1,Nos1,Etnk2,Dbh,Ppap2a,Auh,Th,Chst11,Ddah2,Glud1,Atp7a,Ache,Got2,Padi4,Sat1,Habp4,Mri1,H60a,Gata3
GO:0007126	8,6,7,5	meiosis	93	0.0063	9	0.013	0.0188186	E	Mre11a,Espl1,Lfng,Suv39h2,Fbxo5,Cdc25b,Nek2,Mnd1,Nbn
GO:0051327	7,5,6	M phase of meiotic cell cycle	93	0.0063	9	0.013	0.0188186	E	Mre11a,Espl1,Lfng,Suv39h2,Fbxo5,Cdc25b,Nek2,Mnd1,Nbn
GO:0032880	5,4	regulation of protein localization	63	0.0043	7	0.0101	0.0188933	E	Pkia,Sgk1,Cenpe,Tacc3,Uaca,P2rx7,Nedd1
GO:0030001	6,7	metal ion transport	431	0.0294	28	0.0406	0.0190083	E	Tmem38b,Trpc7,Nos1,Kcnip3,Sgk1,Accn2,Hcn2,Cacna2d4,Nsf,Abcc9,Atp1b1,Scn1a,Cacna1b,P2rx7,Atp7a,Vdr,Scn9a,Kcnab1,Atp2b4,Kcnn3,Slc24a2,Cacna1g,Kctd3,Mmgt1,Tcn2,Sfxn4,Kctd2,Cacna1i
GO:0006677	7,9,8,10	glycosylceramide metabolic process	5	0.0003	2	0.0029	0.0191534	E	Aldh5a1,Gba2
GO:0051136	11,9,10,8,12,13,7	regulation of NK T cell differentiation	5	0.0003	2	0.0029	0.0191534	E	Ap3d1,Cd1d1
GO:0060666	8,7,9,10,6	dichotomous subdivision of terminal units involved in salivary gland branching	5	0.0003	2	0.0029	0.0191534	E	Nrp1,Plxnd1
GO:0007030	4	Golgi organization	5	0.0003	2	0.0029	0.0191534	E	l7Rn6,Cog2
GO:0035095	4,5,7	behavioral response to nicotine	5	0.0003	2	0.0029	0.0191534	E	Chrna3,Chrnb4
GO:0046785	8,7,6	microtubule polymerization	5	0.0003	2	0.0029	0.0191534	E	Psrc1,Fbxo5
GO:0045078	9,8,7,6	positive regulation of interferon-gamma biosynthetic process	5	0.0003	2	0.0029	0.0191534	E	Cebpg,Cd1d1
GO:0045080	9,8,7,6	positive regulation of chemokine biosynthetic process	5	0.0003	2	0.0029	0.0191534	E	Tlr3,Myd88
GO:0042439	7	ethanolamine and derivative metabolic process	5	0.0003	2	0.0029	0.0191534	E	Etnk2,Ache
GO:0008595	7,6,8,9	determination of anterior/posterior axis, embryo	5	0.0003	2	0.0029	0.0191534	E	Frs2,Pcsk6
GO:0007351	6,7,8,5	tripartite regional subdivision	5	0.0003	2	0.0029	0.0191534	E	Frs2,Pcsk6
GO:0051138	12,10,11,9,8,13,14	positive regulation of NK T cell differentiation	5	0.0003	2	0.0029	0.0191534	E	Ap3d1,Cd1d1
GO:0001865	9,11,12,10,8	NK T cell differentiation	5	0.0003	2	0.0029	0.0191534	E	Ap3d1,Cd1d1
GO:0000086	8,5,6,7,4	G2/M transition of mitotic cell cycle	5	0.0003	2	0.0029	0.0191534	E	Pkia,Chek1
GO:0045185	5,4	maintenance of protein location	24	0.0016	4	0.0058	0.0198179	E	Cenpe,Tacc3,Tln1,Nuf2
GO:0051321	4	meiotic cell cycle	94	0.0064	9	0.013	0.0198381	E	Mre11a,Espl1,Lfng,Suv39h2,Fbxo5,Cdc25b,Nek2,Mnd1,Nbn
GO:0007242	6,5	intracellular signaling cascade	967	0.066	55	0.0797	0.0202041	E	Tgif1,Rhob,Rhebl1,Dclk1,Farp2,Nrbp1,Arf2,Rabl3,Chek2,Xpa,Rab32,Map3k1,Depdc1b,Unc13a,Myo9a,Vav3,Chek1,Dusp19,Wdr67,Rhobtb1,Ksr2,E130306D19Rik,Diras2,Irak1bp1,Arhgap1,Gnas,Tlr3,Ppp1r15a,Dnajc27,Ncam1,Arf5,Uaca,Tshr,Adcy6,Prkd2,P2rx7,Pik3cb,Myd88,Wsb2,Plek2,Garnl3,Frs2,Dock2,Adipor2,Rasa3,Rb1cc1,Traf7,Depdc7,Tbc1d9,Rnd3,Nbn,Trim23,Arhgef18,Rab30,Adra2b
GO:0048522	5,3,4	positive regulation of cellular process	1069	0.0729	60	0.087	0.0203664	E	Etv1,Foxd1,Tgif1,Tbx20,Psrc1,Nufip1,Xrcc2,Mkl2,Bmpr2,AY036118,Top2a,Cenpe,Xpa,Map3k1,Nfib,Rtkn2,Tmod2,Vav3,Gclc,Ap3d1,Fbxw4,Tgfb3,Fgf17,Gnas,Sox11,Tlr3,Glud1,Il11ra1,Ncam1,Pax3,Srf,Uaca,Nfix,P2rx7,Myd88,Arntl,Cebpg,Cdca7l,Vdr,Mitf,Mfge8,Atg10,Dock2,Rbpjl,Ngfr,Pknox1,Slc24a2,Nfyc,Rb1cc1,Ddx20,Traf7,H60a,Cd1d1,Mmp9,Il7,Wwox,Usp21,Wwtr1,Cntfr,Gata3
GO:0006139	4	nucleobase, nucleoside, nucleotide and nucleic acid metabolic process	3112	0.2123	158	0.229	0.0204864	E	Rbm39,Etv1,Pkia,Foxd1,Nfatc2ip,Tgif1,Tbx20,Lin54,2210012G02Rik,Psrc1,Ctps,Rad1,Rad54l,Nufip1,Hdac9,Xrcc2,Impdh2,A130010J15Rik,Zcchc12,Mkl2,Zfp280d,Kcnip3,Zfp512,Top2a,Polr1d,Ppp1r10,Ppfibp2,Xpa,Gabpb2,Mre11a,Rest,Nfib,Rpp14,Zfp9,Rpain,Btg2,Tcfcp2,Gins3,Pcgf5,Chek1,Eed,Pms1,Auh,Zfp238,Ctcf,Nsmce2,Tinf2,Swap70,0610007P08Rik,Rfc4,E2f6,Zfp101,Irak1bp1,Tgfb3,Yeats4,Smn1,Gnas,Sox11,Tlr3,Qtrtd1,Rad52,Em…
GO:0001816	3	cytokine production	144	0.0098	12	0.0174	0.0208466	E	Nfatc2ip,Lipa,Dbh,Il1rap,Tlr3,P2rx7,Myd88,Cebpg,H60a,Cd1d1,Irak3,Gata3
GO:0019538	5,4	protein metabolic process	2592	0.1768	133	0.1928	0.0212832	E	Man1c1,Cdca3,Ube2l3,Klhl13,Cdc25c,Fkbp14,Scin,Adh5,Osgep,Psrc1,Usp11,Rps12,Hectd2,Cpvl,Sv2b,Dclk1,Casp8,Fbxo7,Eif2c4,Aurkb,Nrbp1,Bmpr2,Ptprr,Lnpep,Nos1,Ufd1l,Sgk1,Usp49,Chek2,Melk,Dda1,Psmc2,Mst1,Mst1r,Map3k1,Usp3,Btg2,Ttk,Uevld,Ufsp1,Espl1,Chek1,Rpsa,Dusp19,Eed,Mrrf,Hhat,Ksr2,Ppap2a,Gclc,Ptpn21,Klk1b3,Nsmce2,Lipt1,B3galnt1,Fbxw4,Klhl12,Nsf,Naalad2,Chst11,Rnf167,Ube4a,Ccnb1,F13a1,Cdc7,Ppp1r15a,Su…
GO:0017038	5,6,7	protein import	80	0.0055	8	0.0116	0.0215308	E	Pkia,Cep57,Rpain,Mtx2,Tacc3,Uaca,Arntl,Pex13
GO:0016079	6,7,8,9,5	synaptic vesicle exocytosis	14	0.001	3	0.0043	0.0222896	E	Sv2b,P2rx7,Cplx1
GO:0006816	7,8	calcium ion transport	129	0.0088	11	0.0159	0.0223675	E	Trpc7,Nos1,Accn2,Cacna2d4,Cacna1b,P2rx7,Vdr,Atp2b4,Slc24a2,Cacna1g,Cacna1i
GO:0043549	9,6,8	regulation of kinase activity	146	0.01	12	0.0174	0.0225034	E	Pkia,Cenpe,Map3k1,Vav3,Dusp19,Ceacam1,P2rx7,Cdc25b,Frs2,Chrna3,Irak3,Trib3
GO:0043933	3	macromolecular complex subunit organization	364	0.0248	24	0.0348	0.0226602	E	Scin,Cenph,Psrc1,H2afv,Cep57,Map3k1,Smn1,Gemin6,Fbxo5,P2rx7,Ache,Hist1h2ab,Cebpg,Pex13,Sip1,Map6d1,Nedd1,Chrna3,Rrm2,Irak3,Cenpa,Tube1,Tfam,Brf2
GO:0006576	6	biogenic amine metabolic process	81	0.0055	8	0.0116	0.0227727	E	Tph1,Etnk2,Dbh,Th,Atp7a,Ache,Sat1,Gata3
GO:0006812	5,6	cation transport	499	0.034	31	0.0449	0.0228562	E	Tmem38b,P2rx3,Trpc7,Nos1,Kcnip3,Sgk1,Accn2,Hcn2,Cacna2d4,Nsf,Abcc9,Atp1b1,Scn1a,Cacna1b,P2rx7,Atp7a,Vdr,Scn9a,Kcnab1,Atp2b4,Kcnn3,Slc24a2,Cacna1g,Kctd3,Mmgt1,Tcn2,Slc41a2,Sfxn4,Slc22a21,Kctd2,Cacna1i
GO:0006796	5	phosphate metabolic process	938	0.064	53	0.0768	0.0228799	E	Cdc25c,Pkia,Dclk1,Aurkb,Nrbp1,Bmpr2,Ptprr,Sgk1,Chek2,Melk,Cenpe,Mtmr11,Mst1r,Map3k1,Ttk,Vav3,Chek1,Dusp19,Ksr2,Ppap2a,Ptpn21,Ceacam1,Ccnb1,Cdc7,Stk17b,Prkd2,P2rx7,Pik3cb,Atp7a,Cdc25b,Pask,Nek2,Adrbk2,Scyl3,Ptprn,Bub1b,Frs2,Ptpn7,Ick,Chrna3,Gnptab,Rb1cc1,Mapkapk2,Irak3,Ppm1g,Prkg1,Ptpn2,Phkg2,Styx,Nek4,Acvr1b,Trib3,Ptpre
GO:0006793	4	phosphorus metabolic process	938	0.064	53	0.0768	0.0228799	E	Cdc25c,Pkia,Dclk1,Aurkb,Nrbp1,Bmpr2,Ptprr,Sgk1,Chek2,Melk,Cenpe,Mtmr11,Mst1r,Map3k1,Ttk,Vav3,Chek1,Dusp19,Ksr2,Ppap2a,Ptpn21,Ceacam1,Ccnb1,Cdc7,Stk17b,Prkd2,P2rx7,Pik3cb,Atp7a,Cdc25b,Pask,Nek2,Adrbk2,Scyl3,Ptprn,Bub1b,Frs2,Ptpn7,Ick,Chrna3,Gnptab,Rb1cc1,Mapkapk2,Irak3,Ppm1g,Prkg1,Ptpn2,Phkg2,Styx,Nek4,Acvr1b,Trib3,Ptpre
GO:0035295	4	tube development	235	0.016	17	0.0246	0.0231769	E	Foxd1,Tgif1,Tbx20,Casp8,Lipa,Nrp1,Fzd3,l7Rn6,Nfib,Gja1,Stil,Dlc1,Pax3,Atp7a,Ift172,Vdr,Plxnd1
GO:0051028	5,7,6,8	mRNA transport	52	0.0035	6	0.0087	0.0239702	E	Nup43,Gle1,Tmem48,Nup54,Nxt2,Ddx19a
GO:0048518	4,2,3	positive regulation of biological process	1212	0.0827	66	0.0957	0.0245572	E	Etv1,Foxd1,Tgif1,Tbx20,Psrc1,Nufip1,Xrcc2,Mkl2,Bmpr2,AY036118,Sgk1,Top2a,Cenpe,Xpa,Dbh,Map3k1,Nfib,Rtkn2,Tmod2,Vav3,Gclc,Ap3d1,Fbxw4,Tgfb3,Fgf17,Gnas,Gja1,Sox11,Tlr3,Glud1,Il11ra1,Ncam1,Pax3,Srf,Uaca,Tshr,Nfix,P2rx7,Myd88,Chd7,Arntl,Cebpg,Cdca7l,Vdr,Mitf,Mfge8,Atg10,Dock2,Rbpjl,Ngfr,Pknox1,Slc24a2,Nfyc,Rb1cc1,Ddx20,Traf7,H60a,Cd1d1,Mmp9,Irak3,Il7,Wwox,Usp21,Wwtr1,Cntfr,Gata3
GO:0051338	5	regulation of transferase activity	149	0.0102	12	0.0174	0.0251236	E	Pkia,Cenpe,Map3k1,Vav3,Dusp19,Ceacam1,P2rx7,Cdc25b,Frs2,Chrna3,Irak3,Trib3
GO:0048489	4,5,6	synaptic vesicle transport	26	0.0018	4	0.0058	0.0253295	E	Sv2b,Unc13a,P2rx7,Cplx1
GO:0044248	4	cellular catabolic process	828	0.0565	47	0.0681	0.0260022	E	Aldh5a1,Cyp39a1,Cdca3,Ube2l3,Klhl13,Gba2,Hsd17b4,Adh5,Usp11,Hectd2,Dhtkd1,Fbxo7,Nos1,Ufd1l,Usp49,Dda1,Dbh,Usp3,Uevld,Ufsp1,Gclc,Auh,Nsmce2,Fbxw4,Klhl12,Naalad2,Rnf167,Ddah2,Fbxo5,Uhrf2,Edem3,Ache,Wsb2,Got2,Prima1,Pex13,Sat1,Atg10,Traf7,Smurf2,Entpd7,Bard1,Ube2f,Usp21,Usp25,Zhx2,Fbxl5
GO:0034470	8,7,6	ncRNA processing	133	0.0091	11	0.0159	0.0261961	E	Rpp14,Qtrtd1,Adat2,Utp14a,Trpt1,Exosc8,Rpp40,Mettl1,Trit1,Rpp21,Wdr12
GO:0007274	6,7	neuromuscular synaptic transmission	15	0.001	3	0.0043	0.026555	E	P2rx3,Chrna3,Chrnb4
GO:0042306	8,9,10,7	regulation of protein import into nucleus	15	0.001	3	0.0043	0.026555	E	Pkia,Tacc3,Uaca
GO:0007411	7,9,8,4,12,10,13,11,5	axon guidance	100	0.0068	9	0.013	0.0266169	E	Etv1,Foxd1,Nrp1,Slit2,Slit1,Slit3,Ank3,Ngfr,Plxna3
GO:0006813	7,8	potassium ion transport	151	0.0103	12	0.0174	0.0269582	E	Tmem38b,Nos1,Kcnip3,Hcn2,Nsf,Abcc9,Atp1b1,Scn1a,Kcnab1,Kcnn3,Kctd3,Kctd2
GO:0009312	5,6	oligosaccharide biosynthetic process	6	0.0004	2	0.0029	0.0273812	E	B3galnt1,B3galt2
GO:0051225	4,7,8,6	spindle assembly	6	0.0004	2	0.0029	0.0273812	E	Tpx2,Fbxo5
GO:0060073	6,7,5	micturition	6	0.0004	2	0.0029	0.0273812	E	Chrna3,Chrnb4
GO:0007350	5,6,7	blastoderm segmentation	6	0.0004	2	0.0029	0.0273812	E	Frs2,Pcsk6
GO:0060600	6,8,7,9,5	dichotomous subdivision of an epithelial terminal unit	6	0.0004	2	0.0029	0.0273812	E	Nrp1,Plxnd1
GO:0021527	8,9,6,5	spinal cord association neuron differentiation	6	0.0004	2	0.0029	0.0273812	E	Pax3,Lbx1
GO:0040016	4,5	embryonic cleavage	6	0.0004	2	0.0029	0.0273812	E	Top2a,Pik3cb
GO:0006824	7,8,9	cobalt ion transport	6	0.0004	2	0.0029	0.0273812	E	Mmgt1,Tcn2
GO:0042428	8	serotonin metabolic process	6	0.0004	2	0.0029	0.0273812	E	Tph1,Atp7a
GO:0007254	9,8,7,6	JNK cascade	54	0.0037	6	0.0087	0.0276276	E	Nrbp1,Map3k1,Dusp19,Tlr3,Myd88,Rb1cc1
GO:0009308	5	cellular amine metabolic process	279	0.019	19	0.0275	0.0276356	E	Aldh5a1,Ctps,Tph1,Etnk2,Dbh,Ppap2a,Auh,Th,Chst11,Ddah2,Glud1,Atp7a,Ache,Got2,Padi4,Sat1,Habp4,Mri1,Gata3
GO:0042770	7,6	DNA damage response, signal transduction	40	0.0027	5	0.0072	0.0280154	E	Chek2,Xpa,Chek1,Uaca,Nbn
GO:0014070	5	response to organic cyclic substance	27	0.0018	4	0.0058	0.0283407	E	P2rx7,Chrna3,Chrnb4,Chrna5
GO:0007613	7,5	memory	27	0.0018	4	0.0058	0.0283407	E	Accn2,Dbh,Th,Slc24a2
GO:0006672	8,9	ceramide metabolic process	27	0.0018	4	0.0058	0.0283407	E	Aldh5a1,Gba2,Ppap2a,P2rx7
GO:0010926	2	anatomical structure formation	775	0.0529	44	0.0638	0.0283842	E	Scin,Tgif1,Tbx20,Tpx2,Rhob,Psrc1,Angpt2,Txnrd1,Casp8,H2afv,Nrp1,Bmpr2,Fzd3,Cep57,Map3k1,Vav3,Tgfb3,Smn1,Stil,Dlc1,Gemin6,Pax3,Srf,Fbxo5,P2rx7,Atp7a,Ache,Ift172,Hist1h2ab,Dync2li1,Frs2,Pex13,Plxnd1,Sip1,Chrna3,Pknox1,Rrm2,Tln1,Cenpa,Tube1,Tfam,Brf2,Adra2b,Gata3
GO:0065008	3	regulation of biological quality	1045	0.0713	57	0.0826	0.0289604	E	Aldh5a1,Srd5a1,Npy,Scin,Rdh9,Adh5,Psrc1,Txnrd1,Sv2b,Lipa,F2rl2,Mfsd7b,Cenpe,Dbh,Mst1,Map3k1,Ptgs1,Hcn2,Gclc,Tinf2,Th,Tacc3,Igfbp5,Tgfb3,Naalad2,F13a1,Syt1,Scn1a,Glud1,Gpr119,Cacna1b,Ttc7,Srf,P2rx7,Pik3cb,Atp7a,Ache,Prima1,Cebpg,Vdr,Cplx1,Fam3b,Gpr12,Chrna3,Pknox1,Terf1,Slc24a2,Rb1cc1,Ace,Cacna1g,Tln1,Il7,Chrnb4,Arhgef18,Nuf2,Ncan,Cacna1i
GO:0006575	5	cellular amino acid derivative metabolic process	102	0.007	9	0.013	0.0291204	E	Aldh5a1,Tph1,Etnk2,Dbh,Th,Atp7a,Ache,Sat1,Gata3
GO:0050658	4,6,5,7	RNA transport	55	0.0038	6	0.0087	0.0295583	E	Nup43,Gle1,Tmem48,Nup54,Nxt2,Ddx19a
GO:0050657	5,6	nucleic acid transport	55	0.0038	6	0.0087	0.0295583	E	Nup43,Gle1,Tmem48,Nup54,Nxt2,Ddx19a
GO:0051236	3,4,5	establishment of RNA localization	55	0.0038	6	0.0087	0.0295583	E	Nup43,Gle1,Tmem48,Nup54,Nxt2,Ddx19a
GO:0044093	4	positive regulation of molecular function	226	0.0154	16	0.0232	0.0295881	E	Cenpe,Map3k1,Vav3,Ceacam1,Gnas,Tlr3,Uaca,Tshr,Adcy6,P2rx7,Atp7a,Myd88,Cdc25b,Aph1b,Frs2,Chrna3
GO:0031325	6,4,5	positive regulation of cellular metabolic process	537	0.0366	32	0.0464	0.0300653	E	Etv1,Foxd1,Tbx20,Psrc1,Nufip1,Mkl2,Bmpr2,Top2a,Map3k1,Nfib,Gclc,Tgfb3,Sox11,Tlr3,Pax3,Srf,Nfix,P2rx7,Myd88,Arntl,Cebpg,Mitf,Atg10,Rbpjl,Pknox1,Nfyc,Rb1cc1,H60a,Cd1d1,Usp21,Wwtr1,Gata3
GO:0010035	4	response to inorganic substance	28	0.0019	4	0.0058	0.031514	E	Gclc,P2rx7,Atp7a,Cacna1g
GO:0006403	4	RNA localization	56	0.0038	6	0.0087	0.0315547	E	Nup43,Gle1,Tmem48,Nup54,Nxt2,Ddx19a
GO:0007507	5,6	heart development	211	0.0144	15	0.0217	0.0323353	E	Tbx20,Casp8,Hdac9,Mkl2,Nrp1,Th,Gja1,Stil,Dlc1,Pax3,Srf,Chd7,Adam19,Rb1cc1,Lbx1
GO:0046907	5,4	intracellular transport	423	0.0289	26	0.0377	0.0325688	E	Pkia,Ap4m1,Nde1,Bcap31,Cep57,Nup43,1700034H14Rik,Gabarapl2,Napb,Rpain,Gle1,Mtx2,Ap3d1,Tacc3,Sec61b,Uaca,Arntl,Tmem48,Stx18,Nup54,Pex13,Mrpl45,Folr1,Copz2,Ddx19a,Appbp2
GO:0050896	2	response to stimulus	2216	0.1512	111	0.1609	0.0326298	E	Etv1,Adh5,Rad1,Rad54l,P2rx3,Hdac9,Bcap31,Lipa,Xrcc2,F2rl2,Srxn1,Nrbp1,Prkag2,Nos1,Kcnip3,Sgk1,Accn2,Chek2,Glp1r,Xpa,Dbh,Mst1,Cirbp,Map3k1,Mre11a,Cnr2,Slit2,Tmod2,Ly96,Ptgs1,Rpain,Btg2,Cplx2,Chek1,Il1rap,Dusp19,Pms1,Gclc,Nsmce2,Th,Swap70,Cacna2d4,Tacc3,0610007P08Rik,Gnas,Gja1,Abcc9,Tlr3,F13a1,Rad52,Eme1,Scn1a,Ppp1r15a,Cacna1b,Rad51l1,Uaca,Tshr,Txnip,P2rx7,Eif4a2,Opn3,Pik3cb,Ppef1,Atp7a,Nqo1,Edem3,…
GO:0006790	4	sulfur metabolic process	72	0.0049	7	0.0101	0.0326764	E	Aldh5a1,Mocs2,Gclc,Gstk1,Chst11,Mri1,Hs3st3b1
GO:0019941	9,7,8	modification-dependent protein catabolic process	483	0.0329	29	0.042	0.0326982	E	Cdca3,Ube2l3,Klhl13,Usp11,Hectd2,Fbxo7,Ufd1l,Usp49,Dda1,Usp3,Uevld,Ufsp1,Gclc,Nsmce2,Fbxw4,Klhl12,Rnf167,Fbxo5,Uhrf2,Edem3,Wsb2,Atg10,Traf7,Smurf2,Bard1,Ube2f,Usp21,Usp25,Fbxl5
GO:0043632	6	modification-dependent macromolecule catabolic process	483	0.0329	29	0.042	0.0326982	E	Cdca3,Ube2l3,Klhl13,Usp11,Hectd2,Fbxo7,Ufd1l,Usp49,Dda1,Usp3,Uevld,Ufsp1,Gclc,Nsmce2,Fbxw4,Klhl12,Rnf167,Fbxo5,Uhrf2,Edem3,Wsb2,Atg10,Traf7,Smurf2,Bard1,Ube2f,Usp21,Usp25,Fbxl5
GO:0051235	4,3	maintenance of location	42	0.0029	5	0.0072	0.0329034	E	Cenpe,Tacc3,P2rx7,Tln1,Nuf2
GO:0009058	3	biosynthetic process	3382	0.2307	164	0.2377	0.0331229	E	Man1c1,Cyp39a1,Rbm39,Srd5a1,Etv1,Pkia,Foxd1,Nfatc2ip,Tgif1,Tbx20,Rdh9,Lin54,2210012G02Rik,Psrc1,Rps12,Nufip1,Hdac9,Eif2c4,A130010J15Rik,Pctp,Zcchc12,Tph1,Mkl2,Prkag2,Zfp280d,Nos1,Kcnip3,Zfp512,Top2a,Polr1d,Ppp1r10,Abca2,Lss,Mocs2,Etnk2,Dbh,Gabpb2,Rest,Nfib,Zfp9,Ptgs1,Rpain,Btg2,Tcfcp2,Gins3,Chka,Pcgf5,Rpsa,Il1rap,Eed,Mrrf,Hhat,Gtdc1,Ppap2a,Gclc,Acss2,Zfp238,Ctcf,Th,Rfc4,E2f6,Zfp101,B3galnt1,Irak1…
GO:0043085	5	positive regulation of catalytic activity	194	0.0132	14	0.0203	0.0335759	E	Cenpe,Map3k1,Vav3,Ceacam1,Gnas,Uaca,Tshr,Adcy6,P2rx7,Atp7a,Cdc25b,Aph1b,Frs2,Chrna3
GO:0044249	4	cellular biosynthetic process	3325	0.2268	161	0.2333	0.0337195	E	Man1c1,Cyp39a1,Rbm39,Srd5a1,Etv1,Pkia,Foxd1,Nfatc2ip,Tgif1,Tbx20,Rdh9,Lin54,2210012G02Rik,Psrc1,Rps12,Nufip1,Hdac9,Eif2c4,A130010J15Rik,Pctp,Zcchc12,Tph1,Mkl2,Prkag2,Zfp280d,Nos1,Kcnip3,Zfp512,Top2a,Polr1d,Ppp1r10,Abca2,Lss,Mocs2,Etnk2,Dbh,Gabpb2,Rest,Nfib,Zfp9,Ptgs1,Rpain,Btg2,Tcfcp2,Gins3,Chka,Pcgf5,Rpsa,Il1rap,Eed,Mrrf,Hhat,Ppap2a,Gclc,Acss2,Zfp238,Ctcf,Th,Rfc4,E2f6,Zfp101,B3galnt1,Irak1bp1,Tg…
GO:0030097	6,7,5	hemopoiesis	289	0.0197	19	0.0275	0.0342043	E	Casp8,Hdac9,Mfsd7b,AY036118,Rtkn2,Ap3d1,Tacc3,Gnas,Il11ra1,Ttc7,Tshr,Atp7a,Cebpg,Mitf,Dock2,Pknox1,Plscr1,Cd1d1,Il7
GO:0007275	3	multicellular organismal development	2476	0.1689	122	0.1768	0.034782	E	Aldh5a1,Fat3,Ncapg2,Etv1,Foxd1,Tgif1,Tbx20,Nde1,Hsd17b4,Rhob,Angpt2,Txnrd1,Micalcl,Dclk1,Casp8,Hdac9,Lipa,Xrcc2,Farp2,Lrp1,Tph1,Mkl2,Nrp1,Bmpr2,Fzd3,Mfsd7b,AY036118,Plekha1,Top2a,l7Rn6,Cenpe,Etnk2,Dbh,Mst1,Map3k1,Nfib,Slit2,Rtkn2,Olfml3,Btg2,Slit1,Rbbp8,Hhat,Adcyap1r1,Ap3d1,Th,Swap70,Tacc3,Flnb,Plxna4,Rttn,Fbxw4,Igfbp5,Tgfb3,Gnas,Chst11,Gja1,Stil,Sox11,Ccnb1,Dlc1,Lfng,Csrp2,Il11ra1,Ttc7,Pax3,Srf,…
GO:0045859	10,7,9	regulation of protein kinase activity	141	0.0096	11	0.0159	0.0348063	E	Pkia,Cenpe,Map3k1,Dusp19,Ceacam1,P2rx7,Cdc25b,Frs2,Chrna3,Irak3,Trib3
GO:0046519	7,8	sphingoid metabolic process	29	0.002	4	0.0058	0.0348422	E	Aldh5a1,Gba2,Ppap2a,P2rx7
GO:0010604	6,4,5	positive regulation of macromolecule metabolic process	529	0.0361	31	0.0449	0.0352649	E	Etv1,Foxd1,Tbx20,Psrc1,Nufip1,Mkl2,Bmpr2,Top2a,Map3k1,Nfib,Gclc,Tgfb3,Sox11,Tlr3,Pax3,Srf,Nfix,P2rx7,Myd88,Arntl,Cebpg,Mitf,Atg10,Rbpjl,Pknox1,Nfyc,Rb1cc1,Cd1d1,Usp21,Wwtr1,Gata3
GO:0051329	7,5,6	interphase of mitotic cell cycle	43	0.0029	5	0.0072	0.0354879	E	Pkia,Rbbp8,Chek1,E2f6,Anp32b
GO:0008016	6,5,7	regulation of heart contraction	43	0.0029	5	0.0072	0.0354879	E	Glp1r,Th,Gja1,Cacna1b,Cacna1g
GO:0051325	6,5	interphase	43	0.0029	5	0.0072	0.0354879	E	Pkia,Rbbp8,Chek1,E2f6,Anp32b
GO:0016358	5,10,7,11,8,4	dendrite development	43	0.0029	5	0.0072	0.0354879	E	Dclk1,Nrp1,Atp7a,Chrna3,Prkg1
GO:0031098	7,6,5	stress-activated protein kinase signaling pathway	58	0.004	6	0.0087	0.0357375	E	Nrbp1,Map3k1,Dusp19,Tlr3,Myd88,Rb1cc1
GO:0051495	7,5,6	positive regulation of cytoskeleton organization	17	0.0012	3	0.0043	0.0360501	E	Psrc1,Cenpe,Map3k1
GO:0042402	7,6	biogenic amine catabolic process	17	0.0012	3	0.0043	0.0360501	E	Dbh,Ache,Sat1
GO:0009056	3	catabolic process	1352	0.0922	70	0.1014	0.036075	E	Aldh5a1,Cyp39a1,Cdca3,Ube2l3,Klhl13,Gba2,Hsd17b4,Adh5,Osgep,Usp11,Hectd2,Cpvl,Dhtkd1,Casp8,Fbxo7,Lipa,Lnpep,Nos1,Ufd1l,Usp49,Dda1,Psmc2,Dbh,Mst1,Usp3,Uevld,Ufsp1,Espl1,Gclc,Auh,Klk1b3,Nsmce2,Fbxw4,Klhl12,Nsf,Naalad2,Rnf167,Ddah2,Adam15,Fbxo5,P2rx7,Uhrf2,Edem3,Ache,Wsb2,Got2,Prima1,Arntl,Adam19,Pld3,Aebp1,Pex13,Sat1,Atg10,Pld4,Ace,Capn6,Traf7,Smurf2,Entpd7,Mmp9,Bard1,Irak3,Ube2f,Usp21,Usp25,Pter,Z…
GO:0045599	7,6,5	negative regulation of fat cell differentiation	7	0.0005	2	0.0029	0.0365338	E	Enpp1,Wwtr1
GO:0045072	8,7,6	regulation of interferon-gamma biosynthetic process	7	0.0005	2	0.0029	0.0365338	E	Cebpg,Cd1d1
GO:0051881	9,7	regulation of mitochondrial membrane potential	7	0.0005	2	0.0029	0.0365338	E	Gclc,P2rx7
GO:0051323	7,6,5	metaphase	7	0.0005	2	0.0029	0.0365338	E	Fbxo5,Ndc80
GO:0002475	4	antigen processing and presentation via MHC class Ib	7	0.0005	2	0.0029	0.0365338	E	Ap3d1,Cd1d1
GO:0050755	6	chemokine metabolic process	7	0.0005	2	0.0029	0.0365338	E	Tlr3,Myd88
GO:0045073	8,7,6	regulation of chemokine biosynthetic process	7	0.0005	2	0.0029	0.0365338	E	Tlr3,Myd88
GO:0042033	7,5	chemokine biosynthetic process	7	0.0005	2	0.0029	0.0365338	E	Tlr3,Myd88
GO:0021884	9,10,7,11,8	forebrain neuron development	7	0.0005	2	0.0029	0.0365338	E	Atp7a,Plxna3
GO:0009790	3,4	embryonic development	676	0.0461	38	0.0551	0.0365894	E	Ncapg2,Tgif1,Tbx20,Txnrd1,Casp8,Xrcc2,Mkl2,Nrp1,Bmpr2,Fzd3,Mfsd7b,Top2a,Etnk2,Rbbp8,Th,Fbxw4,Tgfb3,Gnas,Chst11,Gja1,Stil,Ccnb1,Dlc1,Pax3,Srf,Odz4,Pik3cb,Ift172,Chd7,Frs2,Plxnd1,Esx1,Nsdhl,Gins1,Muted,Mllt3,Acvr1b,Pcsk6
GO:0051240	5,3,4	positive regulation of multicellular organismal process	125	0.0085	10	0.0145	0.0367945	E	Dbh,Tlr3,Tshr,P2rx7,Myd88,Chd7,Vdr,Slc24a2,H60a,Gata3
GO:0002521	5,7,8,6	leukocyte differentiation	179	0.0122	13	0.0188	0.0368	E	Casp8,Hdac9,Ap3d1,Gnas,Il11ra1,Tshr,Atp7a,Cebpg,Mitf,Dock2,Pknox1,Cd1d1,Il7
GO:0032502	2	developmental process	2915	0.1989	140	0.2029	0.037272	E	Aldh5a1,Srd5a1,Fat3,Ncapg2,Etv1,Foxd1,Tgif1,Tbx20,Nde1,Hsd17b4,Rhob,Angpt2,Txnrd1,Micalcl,Dclk1,Casp8,Hdac9,Lipa,Xrcc2,Farp2,Lrp1,Tph1,Mkl2,Nrp1,Bmpr2,Fzd3,Mfsd7b,Kcnip3,Cep57,AY036118,Plekha1,Top2a,l7Rn6,Cenpe,Xpa,Etnk2,Dbh,Mst1,Map3k1,Nfib,Slit2,Rtkn2,Unc13a,Olfml3,Btg2,Slit1,Rbbp8,Hhat,Gclc,Adcyap1r1,Ap3d1,Th,Swap70,Tacc3,Flnb,Plxna4,Rttn,Fbxw4,Igfbp5,Tgfb3,Gnas,Chst11,Gja1,Stil,Sox11,Ccnb1,Dl…
GO:0007218	8,7	neuropeptide signaling pathway	75	0.0051	7	0.0101	0.0381276	E	Lphn1,Npy,Gpr124,Glp1r,Lphn2,Gpr133,Gipr
GO:0070201	6,4,5	regulation of establishment of protein localization	44	0.003	5	0.0072	0.0381612	E	Pkia,Tacc3,Uaca,P2rx7,Nedd1
GO:0001819	6,4,5	positive regulation of cytokine production	44	0.003	5	0.0072	0.0381612	E	Tlr3,P2rx7,Myd88,H60a,Gata3
GO:0002520	5,3	immune system development	334	0.0228	21	0.0304	0.0382312	E	Casp8,Hdac9,Mfsd7b,AY036118,Rtkn2,Ap3d1,Swap70,Tacc3,Gnas,Il11ra1,Ttc7,Tshr,Atp7a,Cebpg,Mitf,Dock2,Pknox1,Plscr1,Nfkb2,Cd1d1,Il7
GO:0018958	5	phenol metabolic process	30	0.002	4	0.0058	0.0383175	E	Dbh,Th,Atp7a,Gata3
GO:0032886	5,4	regulation of microtubule-based process	30	0.002	4	0.0058	0.0383175	E	Psrc1,Cenpe,Tacc3,Map6d1
GO:0006584	6,7	catecholamine metabolic process	30	0.002	4	0.0058	0.0383175	E	Dbh,Th,Atp7a,Gata3
GO:0010212	5	response to ionizing radiation	30	0.002	4	0.0058	0.0383175	E	Rad54l,Xrcc2,Chek2,Rad54b
GO:0048534	5,6,4	hemopoietic or lymphoid organ development	315	0.0215	20	0.029	0.0386976	E	Casp8,Hdac9,Mfsd7b,AY036118,Rtkn2,Ap3d1,Tacc3,Gnas,Il11ra1,Ttc7,Tshr,Atp7a,Cebpg,Mitf,Dock2,Pknox1,Plscr1,Nfkb2,Cd1d1,Il7
GO:0035239	5,4	tube morphogenesis	163	0.0111	12	0.0174	0.0393002	E	Foxd1,Tgif1,Tbx20,Casp8,Nrp1,Fzd3,Stil,Dlc1,Pax3,Ift172,Vdr,Plxnd1
GO:0051603	8,7	proteolysis involved in cellular protein catabolic process	497	0.0339	29	0.042	0.0393214	E	Cdca3,Ube2l3,Klhl13,Usp11,Hectd2,Fbxo7,Ufd1l,Usp49,Dda1,Usp3,Uevld,Ufsp1,Gclc,Nsmce2,Fbxw4,Klhl12,Rnf167,Fbxo5,Uhrf2,Edem3,Wsb2,Atg10,Traf7,Smurf2,Bard1,Ube2f,Usp21,Usp25,Fbxl5
GO:0009893	5,3,4	positive regulation of metabolic process	560	0.0382	32	0.0464	0.0399071	E	Etv1,Foxd1,Tbx20,Psrc1,Nufip1,Mkl2,Bmpr2,Top2a,Map3k1,Nfib,Gclc,Tgfb3,Sox11,Tlr3,Pax3,Srf,Nfix,P2rx7,Myd88,Arntl,Cebpg,Mitf,Atg10,Rbpjl,Pknox1,Nfyc,Rb1cc1,H60a,Cd1d1,Usp21,Wwtr1,Gata3
GO:0044270	5	nitrogen compound catabolic process	60	0.0041	6	0.0087	0.040159	E	Dbh,Auh,Ddah2,Ache,Got2,Sat1
GO:0015931	4,5	nucleobase, nucleoside, nucleotide and nucleic acid transport	60	0.0041	6	0.0087	0.040159	E	Nup43,Gle1,Tmem48,Nup54,Nxt2,Ddx19a
GO:0009310	6	amine catabolic process	60	0.0041	6	0.0087	0.040159	E	Dbh,Auh,Ddah2,Ache,Got2,Sat1
GO:0044257	7,6	cellular protein catabolic process	499	0.034	29	0.042	0.0402875	E	Cdca3,Ube2l3,Klhl13,Usp11,Hectd2,Fbxo7,Ufd1l,Usp49,Dda1,Usp3,Uevld,Ufsp1,Gclc,Nsmce2,Fbxw4,Klhl12,Rnf167,Fbxo5,Uhrf2,Edem3,Wsb2,Atg10,Traf7,Smurf2,Bard1,Ube2f,Usp21,Usp25,Fbxl5
GO:0048513	4,5	organ development	1641	0.1119	82	0.1188	0.0405613	E	Etv1,Foxd1,Tgif1,Tbx20,Nde1,Hsd17b4,Rhob,Angpt2,Txnrd1,Dclk1,Casp8,Hdac9,Lipa,Tph1,Mkl2,Nrp1,Bmpr2,Fzd3,Mfsd7b,AY036118,Plekha1,l7Rn6,Etnk2,Dbh,Map3k1,Nfib,Slit2,Rtkn2,Ap3d1,Th,Tacc3,Flnb,Fbxw4,Tgfb3,Gnas,Chst11,Gja1,Stil,Dlc1,Lfng,Il11ra1,Ttc7,Pax3,Srf,Tshr,P2rx7,Slit3,Atp7a,Ache,Ift172,Chd7,Adam19,Cebpg,Anxa4,Vdr,Mitf,Frs2,Mesdc2,Pex13,Plxnd1,Dock2,Ngfr,Plxna3,Pknox1,Esx1,Rb1cc1,Nsdhl,Lbx1,Plsc…
GO:0019222	4,3	regulation of metabolic process	2493	0.1701	118	0.171	0.0411997	E	Rbm39,Ube2l3,Etv1,Pkia,Foxd1,Nfatc2ip,Scin,Tgif1,Tbx20,Lin54,2210012G02Rik,Psrc1,Sv2b,Nufip1,Hdac9,Eif2c4,A130010J15Rik,Zcchc12,Mkl2,Bmpr2,Zfp280d,Kcnip3,Zfp512,Top2a,Cenpe,Map3k1,Gabpb2,Rest,Nfib,Btg2,Uevld,Tcfcp2,Pcgf5,Vav3,Dusp19,Eed,Gclc,Zfp238,Ctcf,E2f6,Ceacam1,Irak1bp1,Tgfb3,Yeats4,Gnas,Sox11,Tlr3,Ppp1r15a,Suv39h2,Pax3,Srf,Tshr,Plag1,Txnip,Adcy6,Nfix,P2rx7,Atp7a,Pstk,Ache,Myd88,Cdc25b,Pask,…
GO:0009062	6,7,8	fatty acid catabolic process	18	0.0012	3	0.0043	0.0412304	E	Aldh5a1,Hsd17b4,Pex13
GO:0048813	6,8,7,11,9,12,10,5	dendrite morphogenesis	18	0.0012	3	0.0043	0.0412304	E	Dclk1,Atp7a,Chrna3
GO:0003001	5,3	generation of a signal involved in cell-cell signaling	111	0.0076	9	0.013	0.0417363	E	Sv2b,Syt1,Glud1,Gpr119,Cacna1b,P2rx7,Cplx1,Fam3b,Chrna3
GO:0031323	5,4	regulation of cellular metabolic process	2363	0.1612	112	0.1623	0.0420241	E	Rbm39,Etv1,Pkia,Foxd1,Nfatc2ip,Scin,Tgif1,Tbx20,Lin54,2210012G02Rik,Psrc1,Nufip1,Hdac9,Eif2c4,A130010J15Rik,Zcchc12,Mkl2,Bmpr2,Zfp280d,Kcnip3,Zfp512,Top2a,Cenpe,Map3k1,Gabpb2,Rest,Nfib,Btg2,Tcfcp2,Pcgf5,Vav3,Dusp19,Eed,Gclc,Zfp238,Ctcf,E2f6,Ceacam1,Irak1bp1,Tgfb3,Yeats4,Gnas,Sox11,Tlr3,Ppp1r15a,Suv39h2,Pax3,Srf,Tshr,Plag1,Txnip,Adcy6,Nfix,P2rx7,Atp7a,Pstk,Ache,Myd88,Cdc25b,Pask,Chd7,Arntl,Cebpg,C…
GO:0019752	5	carboxylic acid metabolic process	441	0.0301	26	0.0377	0.0420643	E	Aldh5a1,Cyp39a1,Hsd17b4,Ctps,Tph1,Prkag2,Acadl,Dbh,Ptgs1,Scp2,Gclc,Auh,Th,Ddah2,Mcfd2,Glud1,Sc5d,Atp7a,Got2,Sc4mol,Padi4,Pex13,Adipor2,Mri1,Alox15,Folr1
GO:0006082	4	organic acid metabolic process	442	0.0302	26	0.0377	0.0426061	E	Aldh5a1,Cyp39a1,Hsd17b4,Ctps,Tph1,Prkag2,Acadl,Dbh,Ptgs1,Scp2,Gclc,Auh,Th,Ddah2,Mcfd2,Glud1,Sc5d,Atp7a,Got2,Sc4mol,Padi4,Pex13,Adipor2,Mri1,Alox15,Folr1
GO:0030163	6,5	protein catabolic process	930	0.0634	49	0.071	0.0432561	E	Cdca3,Ube2l3,Klhl13,Osgep,Usp11,Hectd2,Cpvl,Casp8,Fbxo7,Lnpep,Ufd1l,Usp49,Dda1,Psmc2,Mst1,Usp3,Uevld,Ufsp1,Espl1,Gclc,Klk1b3,Nsmce2,Fbxw4,Klhl12,Nsf,Naalad2,Rnf167,Adam15,Fbxo5,P2rx7,Uhrf2,Edem3,Wsb2,Arntl,Adam19,Aebp1,Atg10,Ace,Capn6,Traf7,Smurf2,Mmp9,Bard1,Irak3,Ube2f,Usp21,Usp25,Fbxl5,Bace1
GO:0051276	4	chromosome organization	382	0.0261	23	0.0333	0.0432757	E	Ncapg2,Cenph,Rad54l,Hdac9,H2afv,Top2a,Eed,Ncapd2,Tinf2,Yeats4,Suv39h2,Smc4,Hist1h2ab,Nek2,Chd7,Cebpg,Ncaph,Padi4,Setd8,Rcbtb1,Terf1,Cenpa,Usp21
GO:0048731	4	system development	1989	0.1357	96	0.1391	0.0433317	E	Etv1,Foxd1,Tgif1,Tbx20,Nde1,Hsd17b4,Rhob,Angpt2,Txnrd1,Dclk1,Casp8,Hdac9,Lipa,Xrcc2,Farp2,Tph1,Mkl2,Nrp1,Bmpr2,Fzd3,Mfsd7b,AY036118,Plekha1,l7Rn6,Etnk2,Dbh,Map3k1,Nfib,Slit2,Rtkn2,Btg2,Slit1,Ap3d1,Th,Swap70,Tacc3,Flnb,Plxna4,Fbxw4,Igfbp5,Tgfb3,Gnas,Chst11,Gja1,Stil,Sox11,Dlc1,Lfng,Il11ra1,Ttc7,Pax3,Srf,Tshr,P2rx7,Slit3,Atp7a,Ache,Ift172,Chd7,Adam19,Cebpg,Anxa4,Vdr,Mitf,Frs2,Mesdc2,Pex13,Plxnd1,An…
GO:0048856	3	anatomical structure development	2121	0.1447	101	0.1464	0.0436229	E	Ncapg2,Etv1,Foxd1,Tgif1,Tbx20,Nde1,Hsd17b4,Rhob,Angpt2,Txnrd1,Dclk1,Casp8,Hdac9,Lipa,Xrcc2,Farp2,Tph1,Mkl2,Nrp1,Bmpr2,Fzd3,Mfsd7b,AY036118,Plekha1,l7Rn6,Etnk2,Dbh,Map3k1,Nfib,Slit2,Rtkn2,Btg2,Slit1,Rbbp8,Ap3d1,Th,Swap70,Tacc3,Flnb,Plxna4,Fbxw4,Igfbp5,Tgfb3,Gnas,Chst11,Gja1,Stil,Sox11,Dlc1,Lfng,Il11ra1,Ttc7,Pax3,Srf,Tshr,P2rx7,Odz4,Slit3,Atp7a,Ache,Ift172,Chd7,Adam19,Cebpg,Anxa4,Vdr,Mitf,Frs2,Mesd…
GO:0016125	5,6,7	sterol metabolic process	78	0.0053	7	0.0101	0.0439477	E	Cyp39a1,Pctp,Abca2,Sc5d,Sc4mol,Nsdhl,Soat1
GO:0007167	7,6	enzyme linked receptor protein signaling pathway	283	0.0193	18	0.0261	0.0441431	E	Angpt2,Nrp1,Bmpr2,Cep57,Plekha1,Map3k1,Fgf17,Chst11,Txnip,Myd88,Wfikkn2,Ptprn,Frs2,Ngfr,Chrna3,Ptpn2,Ltbp3,Ptpre
GO:0007610	3	behavior	384	0.0262	23	0.0333	0.0445046	E	Etv1,P2rx3,Kcnip3,Accn2,Glp1r,Dbh,Slit2,Tmod2,Th,Scn1a,Cacna1b,Tshr,Atp7a,Chd7,Scn9a,Pex13,Dock2,Chrna3,Plxna3,Slc24a2,Itga1,Chrnb4,Cxcl10
GO:0022607	3	cellular component assembly	467	0.0319	27	0.0391	0.0449479	E	Scin,Tpx2,Psrc1,H2afv,Cep57,Map3k1,Vav3,Tgfb3,Smn1,Dlc1,Gemin6,Fbxo5,P2rx7,Atp7a,Ache,Ift172,Hist1h2ab,Dync2li1,Pex13,Sip1,Chrna3,Rrm2,Tln1,Cenpa,Tube1,Tfam,Brf2
GO:0034962	6	cellular biopolymer catabolic process	551	0.0376	31	0.0449	0.0451939	E	Cdca3,Ube2l3,Klhl13,Usp11,Hectd2,Fbxo7,Ufd1l,Usp49,Dda1,Usp3,Uevld,Ufsp1,Gclc,Auh,Nsmce2,Fbxw4,Klhl12,Rnf167,Fbxo5,Uhrf2,Edem3,Wsb2,Atg10,Traf7,Smurf2,Bard1,Ube2f,Usp21,Usp25,Zhx2,Fbxl5
GO:0043285	5	biopolymer catabolic process	982	0.067	51	0.0739	0.0454448	E	Cdca3,Ube2l3,Klhl13,Osgep,Usp11,Hectd2,Cpvl,Casp8,Fbxo7,Lnpep,Ufd1l,Usp49,Dda1,Psmc2,Mst1,Usp3,Uevld,Ufsp1,Espl1,Gclc,Auh,Klk1b3,Nsmce2,Fbxw4,Klhl12,Nsf,Naalad2,Rnf167,Adam15,Fbxo5,P2rx7,Uhrf2,Edem3,Wsb2,Arntl,Adam19,Aebp1,Atg10,Ace,Capn6,Traf7,Smurf2,Mmp9,Bard1,Irak3,Ube2f,Usp21,Usp25,Zhx2,Fbxl5,Bace1
GO:0044085	2	cellular component biogenesis	574	0.0392	32	0.0464	0.0460497	E	Scin,Tpx2,Psrc1,H2afv,Cep57,Map3k1,Isg20l2,Vav3,Tgfb3,Smn1,Dlc1,Gemin6,Utp14a,Fbxo5,P2rx7,Atp7a,Ache,Exosc8,Ift172,Hist1h2ab,Dync2li1,Pex13,Sip1,Chrna3,Nop58,Rrm2,Wdr12,Tln1,Cenpa,Tube1,Tfam,Brf2
GO:0045843	7,8,9,10,5,6	negative regulation of striated muscle development	8	0.0005	2	0.0029	0.0464244	E	Hdac9,Luc7l
GO:0045059	10,12,13,11,9,5	positive thymic T cell selection	8	0.0005	2	0.0029	0.0464244	E	Dock2,Cd1d1
GO:0042991	9,10,8,7	transcription factor import into nucleus	8	0.0005	2	0.0029	0.0464244	E	Tacc3,Uaca
GO:0033198	5	response to ATP	8	0.0005	2	0.0029	0.0464244	E	P2rx3,P2rx7
GO:0048635	6,7,8,4,5	negative regulation of muscle development	8	0.0005	2	0.0029	0.0464244	E	Hdac9,Luc7l
GO:0006568	8,7,6	tryptophan metabolic process	8	0.0005	2	0.0029	0.0464244	E	Tph1,Atp7a
GO:0042990	9,10,11,8	regulation of transcription factor import into nucleus	8	0.0005	2	0.0029	0.0464244	E	Tacc3,Uaca
GO:0030517	8,10,9,12,11,6,7,13,14,15	negative regulation of axon extension	8	0.0005	2	0.0029	0.0464244	E	Nrp1,Plxna3
GO:0002224	11,10,12,9,7	toll-like receptor signaling pathway	8	0.0005	2	0.0029	0.0464244	E	Myd88,Irak3
GO:0033157	7,8,6	regulation of intracellular protein transport	19	0.0013	3	0.0043	0.0466637	E	Pkia,Tacc3,Uaca
GO:0033108	7,6,5	mitochondrial respiratory chain complex assembly	1	0.0001	1	0.0014	0.0470701	E	Tfam
GO:0032474	8,6,5,9,10,7,4	otolith morphogenesis	1	0.0001	1	0.0014	0.0470701	E	Muted
GO:0007056	5,8,10,9,7	spindle assembly involved in female meiosis	1	0.0001	1	0.0014	0.0470701	E	Fbxo5
GO:0010932	6,5	regulation of macrophage tolerance induction	1	0.0001	1	0.0014	0.0470701	E	Irak3
GO:0042737	5	drug catabolic process	1	0.0001	1	0.0014	0.0470701	E	Nos1
GO:0009450	7,6,9,10,11	gamma-aminobutyric acid catabolic process	1	0.0001	1	0.0014	0.0470701	E	Aldh5a1
GO:0048553	6	negative regulation of metalloenzyme activity	1	0.0001	1	0.0014	0.0470701	E	Atp7a
GO:0009229	7,8	thiamin diphosphate biosynthetic process	1	0.0001	1	0.0014	0.0470701	E	Tpk1
GO:0042309	6,4	homoiothermy	1	0.0001	1	0.0014	0.0470701	E	Dbh
GO:0014049	6,7,8,5,4,9	positive regulation of glutamate secretion	1	0.0001	1	0.0014	0.0470701	E	P2rx7
GO:0051440	7,5,4	regulation of ubiquitin-protein ligase activity during meiotic cell cycle	1	0.0001	1	0.0014	0.0470701	E	Fbxo5
GO:0042724	7	thiamin and derivative biosynthetic process	1	0.0001	1	0.0014	0.0470701	E	Tpk1
GO:0006580	5,8	ethanolamine metabolic process	1	0.0001	1	0.0014	0.0470701	E	Etnk2
GO:0051665	5	membrane raft localization	1	0.0001	1	0.0014	0.0470701	E	Dock2
GO:0006646	7,9,10,8,6	phosphatidylethanolamine biosynthetic process	1	0.0001	1	0.0014	0.0470701	E	Etnk2
GO:0021920	11,10,12,8,9,7	regulation of transcription from RNA polymerase II promoter involved in spinal cord association neuron specification	1	0.0001	1	0.0014	0.0470701	E	Lbx1
GO:0046931	3	pore complex biogenesis	1	0.0001	1	0.0014	0.0470701	E	P2rx7
GO:0060371	5,8,9,10,6,4,7	regulation of atrial cardiomyocyte membrane depolarization	1	0.0001	1	0.0014	0.0470701	E	Cacna1g
GO:0048387	8,9,10,7,6	negative regulation of retinoic acid receptor signaling pathway	1	0.0001	1	0.0014	0.0470701	E	Tgif1
GO:0032731	8,6,7	positive regulation of interleukin-1 beta production	1	0.0001	1	0.0014	0.0470701	E	P2rx7
GO:0046292	5	formaldehyde metabolic process	1	0.0001	1	0.0014	0.0470701	E	Adh5
GO:0044254	7,6,5	multicellular organismal protein catabolic process	1	0.0001	1	0.0014	0.0470701	E	P2rx7
GO:0042738	6,5	exogenous drug catabolic process	1	0.0001	1	0.0014	0.0470701	E	Nos1
GO:0046655	6,8	folic acid metabolic process	1	0.0001	1	0.0014	0.0470701	E	Folr1
GO:0019673	8,6,9	GDP-mannose metabolic process	1	0.0001	1	0.0014	0.0470701	E	Gmds
GO:0045842	9,8,7,10,11,6,5	positive regulation of mitotic metaphase/anaphase transition	1	0.0001	1	0.0014	0.0470701	E	Cenpe
GO:0032306	7,8,9,6,10	regulation of prostaglandin secretion	1	0.0001	1	0.0014	0.0470701	E	P2rx7
GO:0051541	6	elastin metabolic process	1	0.0001	1	0.0014	0.0470701	E	Atp7a
GO:0032303	7,6	regulation of icosanoid secretion	1	0.0001	1	0.0014	0.0470701	E	P2rx7
GO:0051823	6,5,8,9	regulation of synapse structural plasticity	1	0.0001	1	0.0014	0.0470701	E	Ncan
GO:0060003	5,9,6,10,7	copper ion export	1	0.0001	1	0.0014	0.0470701	E	Atp7a
GO:0042357	6,7	thiamin diphosphate metabolic process	1	0.0001	1	0.0014	0.0470701	E	Tpk1
GO:0006069	7	ethanol oxidation	1	0.0001	1	0.0014	0.0470701	E	Adh5
GO:0046335	6,8,9,7	ethanolamine biosynthetic process	1	0.0001	1	0.0014	0.0470701	E	Etnk2
GO:0010933	7,5,6	positive regulation of macrophage tolerance induction	1	0.0001	1	0.0014	0.0470701	E	Irak3
GO:0046359	8,9,10	butyrate catabolic process	1	0.0001	1	0.0014	0.0470701	E	Aldh5a1
GO:0043132	5,6	NAD transport	1	0.0001	1	0.0014	0.0470701	E	P2rx7
GO:0010936	7,5,6	negative regulation of macrophage cytokine production	1	0.0001	1	0.0014	0.0470701	E	Irak3
GO:0046294	6	formaldehyde catabolic process	1	0.0001	1	0.0014	0.0470701	E	Adh5
GO:0018009	10,11,13,12,9	N-terminal peptidyl-L-cysteine N-palmitoylation	1	0.0001	1	0.0014	0.0470701	E	Map6d1
GO:0031580	5,6	membrane raft distribution	1	0.0001	1	0.0014	0.0470701	E	Dock2
GO:0032308	7,8,9,10,6,11,5	positive regulation of prostaglandin secretion	1	0.0001	1	0.0014	0.0470701	E	P2rx7
GO:0031498	4,7	chromatin disassembly	1	0.0001	1	0.0014	0.0470701	E	Cebpg
GO:0051987	8,7,9,10,11,6,5	positive regulation of attachment of spindle microtubules to kinetochore	1	0.0001	1	0.0014	0.0470701	E	Cenpe
GO:0021519	10,9,11,7,8,6	spinal cord association neuron specification	1	0.0001	1	0.0014	0.0470701	E	Lbx1
GO:0032305	7,8,6,5	positive regulation of icosanoid secretion	1	0.0001	1	0.0014	0.0470701	E	P2rx7
GO:0010935	6,5	regulation of macrophage cytokine production	1	0.0001	1	0.0014	0.0470701	E	Irak3
GO:0016578	9,10,11	histone deubiquitination	1	0.0001	1	0.0014	0.0470701	E	Usp21
GO:0032800	5	receptor biosynthetic process	1	0.0001	1	0.0014	0.0470701	E	Ache
GO:0040032	6,5	post-embryonic body morphogenesis	1	0.0001	1	0.0014	0.0470701	E	Gnas
GO:0010934	4	macrophage cytokine production	1	0.0001	1	0.0014	0.0470701	E	Irak3
GO:0032986	6,5	protein-DNA complex disassembly	1	0.0001	1	0.0014	0.0470701	E	Cebpg
GO:0046337	6,7	phosphatidylethanolamine metabolic process	1	0.0001	1	0.0014	0.0470701	E	Etnk2
GO:0060558	7	regulation of calcidiol 1-monooxygenase activity	1	0.0001	1	0.0014	0.0470701	E	Vdr
GO:0051901	6,11,12,7,9,10,4,5	positive regulation of mitochondrial depolarization	1	0.0001	1	0.0014	0.0470701	E	P2rx7
GO:0042347	10,9,11,12,13,8,7	negative regulation of NF-kappaB import into nucleus	1	0.0001	1	0.0014	0.0470701	E	Uaca
GO:0002082	7,9,6,8	regulation of oxidative phosphorylation	1	0.0001	1	0.0014	0.0470701	E	Atp7a
GO:0034405	4	response to fluid shear stress	1	0.0001	1	0.0014	0.0470701	E	P2rx7
GO:0006680	9,11,10,12	glucosylceramide catabolic process	1	0.0001	1	0.0014	0.0470701	E	Gba2
GO:0051383	5,4	kinetochore organization	1	0.0001	1	0.0014	0.0470701	E	Cenph
GO:0006585	9,10,8,7	dopamine biosynthetic process from tyrosine	1	0.0001	1	0.0014	0.0470701	E	Th
GO:0019626	7,8,9	short-chain fatty acid catabolic process	1	0.0001	1	0.0014	0.0470701	E	Aldh5a1
GO:0051865	10,11,9	protein autoubiquitination	1	0.0001	1	0.0014	0.0470701	E	Uhrf2
GO:0015677	5,9,6,10,7	copper ion import	1	0.0001	1	0.0014	0.0470701	E	Atp7a
GO:0010045	6	response to nickel ion	1	0.0001	1	0.0014	0.0470701	E	Cacna1g
GO:0044266	5	multicellular organismal macromolecule catabolic process	1	0.0001	1	0.0014	0.0470701	E	P2rx7
GO:0032310	8,6,9,7	prostaglandin secretion	1	0.0001	1	0.0014	0.0470701	E	P2rx7
GO:0018065	9,8	protein-cofactor linkage	1	0.0001	1	0.0014	0.0470701	E	Lipt1
GO:0033037	4	polysaccharide localization	1	0.0001	1	0.0014	0.0470701	E	Chst11
GO:0009249	10,9	protein lipoylation	1	0.0001	1	0.0014	0.0470701	E	Lipt1
GO:0006337	5,7,6,8	nucleosome disassembly	1	0.0001	1	0.0014	0.0470701	E	Cebpg
GO:0032309	5,6	icosanoid secretion	1	0.0001	1	0.0014	0.0470701	E	P2rx7
GO:0006581	7,9,10,8,6	acetylcholine catabolic process	1	0.0001	1	0.0014	0.0470701	E	Ache
GO:0042414	7,8	epinephrine metabolic process	1	0.0001	1	0.0014	0.0470701	E	Atp7a
GO:0010931	4	macrophage tolerance induction	1	0.0001	1	0.0014	0.0470701	E	Irak3
GO:0032732	7,5,6	positive regulation of interleukin-1 production	1	0.0001	1	0.0014	0.0470701	E	P2rx7
GO:0051409	4	response to nitrosative stress	1	0.0001	1	0.0014	0.0470701	E	Adh5
GO:0007057	6,9,11,10,8,5	spindle assembly involved in female meiosis I	1	0.0001	1	0.0014	0.0470701	E	Fbxo5
GO:0016560	7,6,10,9,8,11	protein import into peroxisome matrix, docking	1	0.0001	1	0.0014	0.0470701	E	Pex13
GO:0044256	4	protein digestion	1	0.0001	1	0.0014	0.0470701	E	P2rx7
GO:0001766	6,7	membrane raft polarization	1	0.0001	1	0.0014	0.0470701	E	Dock2
GO:0045212	7,8,6	neurotransmitter receptor biosynthetic process	1	0.0001	1	0.0014	0.0470701	E	Ache
GO:0051984	6,4,5	positive regulation of chromosome segregation	1	0.0001	1	0.0014	0.0470701	E	Cenpe
GO:0051442	8,6,5	negative regulation of ubiquitin-protein ligase activity during meiotic cell cycle	1	0.0001	1	0.0014	0.0470701	E	Fbxo5
GO:0051542	7	elastin biosynthetic process	1	0.0001	1	0.0014	0.0470701	E	Atp7a
GO:0006606	8,9,7,6	protein import into nucleus	63	0.0043	6	0.0087	0.0471949	E	Pkia,Cep57,Rpain,Tacc3,Uaca,Arntl
GO:0016310	6	phosphorylation	816	0.0557	43	0.0623	0.0479763	E	Pkia,Dclk1,Aurkb,Nrbp1,Bmpr2,Sgk1,Chek2,Melk,Cenpe,Mst1r,Map3k1,Ttk,Vav3,Chek1,Dusp19,Ksr2,Ceacam1,Ccnb1,Cdc7,Stk17b,Prkd2,P2rx7,Pik3cb,Atp7a,Cdc25b,Pask,Nek2,Adrbk2,Scyl3,Bub1b,Frs2,Ick,Chrna3,Gnptab,Rb1cc1,Mapkapk2,Irak3,Prkg1,Phkg2,Nek4,Acvr1b,Trib3,Ptpre
GO:0001775	3	cell activation	308	0.021	19	0.0275	0.0479934	E	Hdac9,Impdh2,Cplx2,Ap3d1,Swap70,Il11ra1,Tshr,P2rx7,Pik3cb,Atp7a,Cebpg,H60b,Dock2,Pknox1,Ccnd3,Nfkb2,H60a,Cd1d1,Il7
GO:0034621	4,3	cellular macromolecular complex subunit organization	308	0.021	19	0.0275	0.0479934	E	Scin,Cenph,Psrc1,H2afv,Map3k1,Smn1,Gemin6,Fbxo5,Hist1h2ab,Cebpg,Pex13,Sip1,Map6d1,Nedd1,Chrna3,Cenpa,Tube1,Tfam,Brf2
GO:0051246	6,5	regulation of protein metabolic process	349	0.0238	21	0.0304	0.0482593	E	Ube2l3,Scin,Psrc1,Sv2b,Eif2c4,Bmpr2,Map3k1,Uevld,Gclc,Ppp1r15a,P2rx7,Pstk,Ache,Arntl,Paip2b,Map6d1,Atg10,Ngdn,Rb1cc1,Irak3,Ube2f
GO:0051239	4,3	regulation of multicellular organismal process	666	0.0454	36	0.0522	0.0486964	E	Tgif1,Angpt2,P2rx3,Hdac9,Xrcc2,Nrp1,Glp1r,Dbh,Ap3d1,Th,Gnas,Gja1,Tlr3,Cacna1b,Tshr,P2rx7,Myd88,Chd7,Cebpg,Vdr,Mitf,Ngfr,Chrna3,Plxna3,Enpp1,Slc24a2,Lbx1,Cacna1g,Nlgn2,H60a,Cd1d1,Luc7l,Irak3,Il7,Chrnb4,Gata3
GO:0006519	4	cellular amino acid and derivative metabolic process	249	0.017	16	0.0232	0.0488395	E	Aldh5a1,Ctps,Tph1,Etnk2,Dbh,Auh,Th,Ddah2,Glud1,Atp7a,Ache,Got2,Padi4,Sat1,Mri1,Gata3
GO:0042981	7,6	regulation of apoptosis	475	0.0324	27	0.0391	0.0491279	E	Casp8,Xrcc2,Kcnip3,Xpa,Dbh,Btg2,Gclc,Tgfb3,Chst11,Stil,Uaca,P2rx7,Atp7a,Cebpg,Vdr,Birc3,Mitf,Ngfr,Rb1cc1,Ddx20,H60a,Cd1d1,Mmp9,Irak3,Il7,Wwox,Bmf
GO:0051899	9,7	membrane depolarization	33	0.0023	4	0.0058	0.0495363	E	Gclc,P2rx7,Chrna3,Cacna1g
GO:0032496	6,5,7	response to lipopolysaccharide	33	0.0023	4	0.0058	0.0495363	E	Adh5,P2rx7,Myd88,Irak3
GO:0006511	10,8,9	ubiquitin-dependent protein catabolic process	116	0.0079	9	0.013	0.0495454	E	Usp11,Ufd1l,Usp49,Usp3,Gclc,Uhrf2,Edem3,Usp21,Usp25
GO:0009314	4	response to radiation	116	0.0079	9	0.013	0.0495454	E	Rad54l,Xrcc2,Chek2,Xpa,Dbh,Rpain,Uaca,Opn3,Rad54b
GO:0051170	8,7	nuclear import	64	0.0044	6	0.0087	0.0496367	E	Pkia,Cep57,Rpain,Tacc3,Uaca,Arntl
GO:0060606	5,7,6	tube closure	48	0.0033	5	0.0072	0.0496559	E	Tgif1,Fzd3,Stil,Dlc1,Pax3
GO:0001843	7,6,9,8,10,12,11,13	neural tube closure	48	0.0033	5	0.0072	0.0496559	E	Tgif1,Fzd3,Stil,Dlc1,Pax3
GO:0006520	5,6	cellular amino acid metabolic process	172	0.0117	12	0.0174	0.0497566	E	Aldh5a1,Ctps,Tph1,Dbh,Auh,Th,Ddah2,Glud1,Atp7a,Got2,Padi4,Mri1
GO:0042325	8,7	regulation of phosphorylation	231	0.0158	15	0.0217	0.0505046	E	Pkia,Bmpr2,Cenpe,Map3k1,Vav3,Dusp19,Ceacam1,P2rx7,Atp7a,Cdc25b,Frs2,Chrna3,Rb1cc1,Irak3,Trib3
GO:0030098	6,8,9,7,5	lymphocyte differentiation	135	0.0092	10	0.0145	0.0505864	E	Hdac9,Ap3d1,Il11ra1,Tshr,Atp7a,Cebpg,Dock2,Pknox1,Cd1d1,Il7
GO:0044057	5,4	regulation of system process	154	0.0105	11	0.0159	0.0509863	E	P2rx3,Glp1r,Dbh,Th,Gja1,Cacna1b,Chrna3,Slc24a2,Cacna1g,Nlgn2,Chrnb4
GO:0033674	10,7,9	positive regulation of kinase activity	99	0.0068	8	0.0116	0.0511419	E	Cenpe,Map3k1,Vav3,Ceacam1,P2rx7,Cdc25b,Frs2,Chrna3
GO:0001701	6,7	in utero embryonic development	252	0.0172	16	0.0232	0.0515435	E	Ncapg2,Xrcc2,Mkl2,Mfsd7b,Etnk2,Rbbp8,Tgfb3,Gja1,Stil,Ccnb1,Srf,Chd7,Esx1,Nsdhl,Gins1,Acvr1b
GO:0030101	6,5	natural killer cell activation	20	0.0014	3	0.0043	0.0523223	E	Il11ra1,H60b,H60a
GO:0010171	5,4	body morphogenesis	20	0.0014	3	0.0043	0.0523223	E	Mfsd7b,Plekha1,Gnas
GO:0042417	7,8	dopamine metabolic process	20	0.0014	3	0.0043	0.0523223	E	Dbh,Th,Atp7a
GO:0043009	5,6	chordate embryonic development	418	0.0285	24	0.0348	0.0525265	E	Ncapg2,Tgif1,Casp8,Xrcc2,Mkl2,Fzd3,Mfsd7b,Etnk2,Rbbp8,Tgfb3,Gnas,Chst11,Gja1,Stil,Ccnb1,Dlc1,Pax3,Srf,Ift172,Chd7,Esx1,Nsdhl,Gins1,Acvr1b
GO:0043067	6,5	regulation of programmed cell death	482	0.0329	27	0.0391	0.0527413	E	Casp8,Xrcc2,Kcnip3,Xpa,Dbh,Btg2,Gclc,Tgfb3,Chst11,Stil,Uaca,P2rx7,Atp7a,Cebpg,Vdr,Birc3,Mitf,Ngfr,Rb1cc1,Ddx20,H60a,Cd1d1,Mmp9,Irak3,Il7,Wwox,Bmf
GO:0006508	7,6	proteolysis	901	0.0615	46	0.0667	0.0528488	E	Cdca3,Ube2l3,Klhl13,Osgep,Usp11,Hectd2,Cpvl,Casp8,Fbxo7,Lnpep,Ufd1l,Usp49,Dda1,Mst1,Usp3,Uevld,Ufsp1,Espl1,Gclc,Klk1b3,Nsmce2,Fbxw4,Klhl12,Nsf,Naalad2,Rnf167,Adam15,Fbxo5,P2rx7,Uhrf2,Edem3,Wsb2,Adam19,Aebp1,Atg10,Ace,Capn6,Traf7,Smurf2,Mmp9,Bard1,Ube2f,Usp21,Usp25,Fbxl5,Bace1
GO:0009057	4	macromolecule catabolic process	1039	0.0709	52	0.0754	0.0528648	E	Cdca3,Ube2l3,Klhl13,Osgep,Usp11,Hectd2,Cpvl,Dhtkd1,Casp8,Fbxo7,Lnpep,Ufd1l,Usp49,Dda1,Psmc2,Mst1,Usp3,Uevld,Ufsp1,Espl1,Gclc,Auh,Klk1b3,Nsmce2,Fbxw4,Klhl12,Nsf,Naalad2,Rnf167,Adam15,Fbxo5,P2rx7,Uhrf2,Edem3,Wsb2,Arntl,Adam19,Aebp1,Atg10,Ace,Capn6,Traf7,Smurf2,Mmp9,Bard1,Irak3,Ube2f,Usp21,Usp25,Zhx2,Fbxl5,Bace1
GO:0051347	6	positive regulation of transferase activity	100	0.0068	8	0.0116	0.0529852	E	Cenpe,Map3k1,Vav3,Ceacam1,P2rx7,Cdc25b,Frs2,Chrna3
GO:0042127	5,4	regulation of cell proliferation	442	0.0302	25	0.0362	0.0541406	E	Tgif1,AY036118,Dbh,Nfib,Rtkn2,Ptgs1,Fbxw4,Tgfb3,Fgf17,Ifitm3,Chst11,Il11ra1,Pax3,Myd88,Cdca7l,Mitf,Cdca7,Frs2,Sat1,Ngfr,Lbx1,Il7,Sparc,Cntfr,Gata3
GO:0010941	5,4	regulation of cell death	485	0.0331	27	0.0391	0.0542666	E	Casp8,Xrcc2,Kcnip3,Xpa,Dbh,Btg2,Gclc,Tgfb3,Chst11,Stil,Uaca,P2rx7,Atp7a,Cebpg,Vdr,Birc3,Mitf,Ngfr,Rb1cc1,Ddx20,H60a,Cd1d1,Mmp9,Irak3,Il7,Wwox,Bmf
GO:0009792	4,5	embryonic development ending in birth or egg hatching	421	0.0287	24	0.0348	0.0542793	E	Ncapg2,Tgif1,Casp8,Xrcc2,Mkl2,Fzd3,Mfsd7b,Etnk2,Rbbp8,Tgfb3,Gnas,Chst11,Gja1,Stil,Ccnb1,Dlc1,Pax3,Srf,Ift172,Chd7,Esx1,Nsdhl,Gins1,Acvr1b
GO:0006836	4,5	neurotransmitter transport	83	0.0057	7	0.0101	0.0543349	E	Sv2b,Cplx2,Syt1,Cacna1b,P2rx7,Cplx1,Chrna3
GO:0060562	8,7,6,9,5	epithelial tube morphogenesis	119	0.0081	9	0.013	0.0544361	E	Foxd1,Tgif1,Casp8,Fzd3,Stil,Dlc1,Pax3,Ift172,Vdr
GO:0034504	7	protein localization in nucleus	66	0.0045	6	0.0087	0.0546467	E	Pkia,Cep57,Rpain,Tacc3,Uaca,Arntl
GO:0031328	7,5,6	positive regulation of cellular biosynthetic process	466	0.0318	26	0.0377	0.0555472	E	Etv1,Foxd1,Tbx20,Psrc1,Nufip1,Mkl2,Top2a,Nfib,Tgfb3,Sox11,Tlr3,Pax3,Srf,Nfix,Myd88,Arntl,Cebpg,Mitf,Rbpjl,Pknox1,Nfyc,H60a,Cd1d1,Usp21,Wwtr1,Gata3
GO:0007264	7,6	small GTPase mediated signal transduction	381	0.026	22	0.0319	0.0556928	E	Rhob,Rhebl1,Farp2,Arf2,Rabl3,Rab32,Vav3,Wdr67,Rhobtb1,E130306D19Rik,Diras2,Arhgap1,Dnajc27,Arf5,Garnl3,Dock2,Rasa3,Tbc1d9,Rnd3,Trim23,Arhgef18,Rab30
GO:0006915	5	apoptosis	731	0.0499	38	0.0551	0.0558021	E	Rhob,Casp8,Bcap31,Xrcc2,Kcnip3,Sgk1,Xpa,Dbh,Map3k1,Btg2,Gclc,Tgfb3,Chst11,Stil,Ppp1r15a,Stk17b,Uaca,P2rx7,Atp7a,Cebpg,Vdr,Bub1b,Birc3,Mitf,Ngfr,Faim2,Rb1cc1,Ddx20,Traf7,H60a,Cd1d1,Mmp9,Irak3,Il7,Wwox,Phlpp1,Bmf,Trib3
GO:0019220	7,6	regulation of phosphate metabolic process	237	0.0162	15	0.0217	0.0563269	E	Pkia,Bmpr2,Cenpe,Map3k1,Vav3,Dusp19,Ceacam1,P2rx7,Atp7a,Cdc25b,Frs2,Chrna3,Rb1cc1,Irak3,Trib3
GO:0007626	4	locomotory behavior	237	0.0162	15	0.0217	0.0563269	E	Dbh,Slit2,Th,Scn1a,Cacna1b,Tshr,Atp7a,Chd7,Pex13,Dock2,Chrna3,Plxna3,Itga1,Chrnb4,Cxcl10
GO:0051174	6,5	regulation of phosphorus metabolic process	237	0.0162	15	0.0217	0.0563269	E	Pkia,Bmpr2,Cenpe,Map3k1,Vav3,Dusp19,Ceacam1,P2rx7,Atp7a,Cdc25b,Frs2,Chrna3,Rb1cc1,Irak3,Trib3
GO:0030900	4,6,7,8	forebrain development	158	0.0108	11	0.0159	0.0563342	E	Nde1,Dclk1,Nfib,Tacc3,Stil,Dlc1,Atp7a,Frs2,Pex13,Plxna3,Prkg1
GO:0033365	6	protein localization in organelle	84	0.0057	7	0.0101	0.056497	E	Pkia,Cep57,Rpain,Mtx2,Tacc3,Uaca,Arntl
GO:0009891	6,4,5	positive regulation of biosynthetic process	468	0.0319	26	0.0377	0.0565908	E	Etv1,Foxd1,Tbx20,Psrc1,Nufip1,Mkl2,Top2a,Nfib,Tgfb3,Sox11,Tlr3,Pax3,Srf,Nfix,Myd88,Arntl,Cebpg,Mitf,Rbpjl,Pknox1,Nfyc,H60a,Cd1d1,Usp21,Wwtr1,Gata3
GO:0048266	5,4,6	behavioral response to pain	9	0.0006	2	0.0029	0.0568856	E	P2rx3,Scn9a
GO:0018345	8,9	protein palmitoylation	9	0.0006	2	0.0029	0.0568856	E	Hhat,Map6d1
GO:0006536	7,8	glutamate metabolic process	9	0.0006	2	0.0029	0.0568856	E	Aldh5a1,Got2
GO:0001556	6,7,8,5,9	oocyte maturation	9	0.0006	2	0.0029	0.0568856	E	Fbxo5,Cdc25b
GO:0042095	7,5	interferon-gamma biosynthetic process	9	0.0006	2	0.0029	0.0568856	E	Cebpg,Cd1d1
GO:0043368	9,11,12,10,8,4	positive T cell selection	9	0.0006	2	0.0029	0.0568856	E	Dock2,Cd1d1
GO:0006400	10,8,9,7	tRNA modification	9	0.0006	2	0.0029	0.0568856	E	Qtrtd1,Mettl1
GO:0009311	5	oligosaccharide metabolic process	9	0.0006	2	0.0029	0.0568856	E	B3galnt1,B3galt2
GO:0009065	7,8	glutamine family amino acid catabolic process	9	0.0006	2	0.0029	0.0568856	E	Ddah2,Got2
GO:0006570	7,6,8	tyrosine metabolic process	9	0.0006	2	0.0029	0.0568856	E	Th,Atp7a
GO:0070271	3	protein complex biogenesis	178	0.0121	12	0.0174	0.057083	E	Scin,Psrc1,Cep57,Map3k1,Fbxo5,P2rx7,Ache,Pex13,Chrna3,Rrm2,Tube1,Tfam
GO:0006461	5,4	protein complex assembly	178	0.0121	12	0.0174	0.057083	E	Scin,Psrc1,Cep57,Map3k1,Fbxo5,P2rx7,Ache,Pex13,Chrna3,Rrm2,Tube1,Tfam
GO:0042089	6,4	cytokine biosynthetic process	67	0.0046	6	0.0087	0.0572084	E	Il1rap,Tlr3,Myd88,Cebpg,Cd1d1,Gata3
GO:0010557	7,5,6	positive regulation of macromolecule biosynthetic process	448	0.0306	25	0.0362	0.0574335	E	Etv1,Foxd1,Tbx20,Psrc1,Nufip1,Mkl2,Top2a,Nfib,Tgfb3,Sox11,Tlr3,Pax3,Srf,Nfix,Myd88,Arntl,Cebpg,Mitf,Rbpjl,Pknox1,Nfyc,Cd1d1,Usp21,Wwtr1,Gata3
GO:0006873	7,5	cellular ion homeostasis	218	0.0149	14	0.0203	0.0574637	E	Hcn2,Gclc,Scn1a,Ttc7,P2rx7,Pik3cb,Atp7a,Vdr,Gpr12,Chrna3,Slc24a2,Cacna1g,Chrnb4,Cacna1i
GO:0016050	4	vesicle organization	35	0.0024	4	0.0058	0.0575785	E	Unc13a,Vav3,Fbxo5,P2rx7
GO:0043410	9,10,8,7	positive regulation of MAPKKK cascade	35	0.0024	4	0.0058	0.0575785	E	Tlr3,P2rx7,Myd88,Traf7
GO:0033555	3,4	multicellular organismal response to stress	35	0.0024	4	0.0058	0.0575785	E	P2rx3,Kcnip3,Dbh,Scn9a
GO:0046822	7,8,6	regulation of nucleocytoplasmic transport	21	0.0014	3	0.0043	0.058178	E	Pkia,Tacc3,Uaca
GO:0019395	6,7,8	fatty acid oxidation	21	0.0014	3	0.0043	0.058178	E	Hsd17b4,Pex13,Adipor2
GO:0070507	7,6,5	regulation of microtubule cytoskeleton organization	21	0.0014	3	0.0043	0.058178	E	Psrc1,Cenpe,Map6d1
GO:0034440	6,7	lipid oxidation	21	0.0014	3	0.0043	0.058178	E	Hsd17b4,Pex13,Adipor2
GO:0009072	6,5,7	aromatic amino acid family metabolic process	21	0.0014	3	0.0043	0.058178	E	Tph1,Th,Atp7a
GO:0006725	4	cellular aromatic compound metabolic process	103	0.007	8	0.0116	0.0586228	E	Aldh5a1,Tph1,Mocs2,Dbh,Th,Atp7a,Folr1,Gata3
GO:0012501	4	programmed cell death	742	0.0506	38	0.0551	0.0589425	E	Rhob,Casp8,Bcap31,Xrcc2,Kcnip3,Sgk1,Xpa,Dbh,Map3k1,Btg2,Gclc,Tgfb3,Chst11,Stil,Ppp1r15a,Stk17b,Uaca,P2rx7,Atp7a,Cebpg,Vdr,Bub1b,Birc3,Mitf,Ngfr,Faim2,Rb1cc1,Ddx20,Traf7,H60a,Cd1d1,Mmp9,Irak3,Il7,Wwox,Phlpp1,Bmf,Trib3
GO:0008217	4,6	regulation of blood pressure	51	0.0035	5	0.0072	0.0589819	E	Npy,Adh5,Ptgs1,Cacna1b,Ace
GO:0042493	4	response to drug	51	0.0035	5	0.0072	0.0589819	E	Rad54l,Nos1,Gnas,P2rx7,Rad54b
GO:0014020	6,5,8,7,9,11,10,12	primary neural tube formation	51	0.0035	5	0.0072	0.0589819	E	Tgif1,Fzd3,Stil,Dlc1,Pax3
GO:0051704	2	multi-organism process	323	0.022	19	0.0275	0.0593095	E	Adh5,Mst1,Mst1r,Th,Ceacam1,Abcc9,Tlr3,Il11ra1,P2rx7,Myd88,Vdr,Zc3hav1,Pex13,Oas1b,Plscr1,Irak3,Cotl1,Ifna14,Fv1
GO:0009628	3	response to abiotic stimulus	200	0.0136	13	0.0188	0.0596946	E	Etv1,Rad54l,P2rx3,Xrcc2,Chek2,Xpa,Dbh,Rpain,Uaca,P2rx7,Opn3,Ngfr,Rad54b
GO:0042107	5	cytokine metabolic process	68	0.0046	6	0.0087	0.0598035	E	Il1rap,Tlr3,Myd88,Cebpg,Cd1d1,Gata3
GO:0044265	5	cellular macromolecule catabolic process	608	0.0415	32	0.0464	0.0599002	E	Cdca3,Ube2l3,Klhl13,Usp11,Hectd2,Dhtkd1,Fbxo7,Ufd1l,Usp49,Dda1,Usp3,Uevld,Ufsp1,Gclc,Auh,Nsmce2,Fbxw4,Klhl12,Rnf167,Fbxo5,Uhrf2,Edem3,Wsb2,Atg10,Traf7,Smurf2,Bard1,Ube2f,Usp21,Usp25,Zhx2,Fbxl5
GO:0044255	4,5	cellular lipid metabolic process	564	0.0385	30	0.0435	0.0602767	E	Aldh5a1,Cyp39a1,Srd5a1,Gba2,Hsd17b4,Adh5,Pctp,Pip4k2a,Prkag2,Acadl,Abca2,Lss,Etnk2,Ptgs1,Chka,Scp2,Ppap2a,Sc5d,P2rx7,Pik3cb,Osbpl1a,Sc4mol,Pex13,Adipor2,Nsdhl,Pigl,B4galt6,Chpt1,Alox15,Soat1
GO:0032270	7,8,5,6	positive regulation of cellular protein metabolic process	86	0.0059	7	0.0101	0.060888	E	Psrc1,Bmpr2,Map3k1,Gclc,P2rx7,Atg10,Rb1cc1
GO:0007010	4	cytoskeleton organization	305	0.0208	18	0.0261	0.0616604	E	Cnn2,Scin,Nde1,Tpx2,Psrc1,Cenpe,Map3k1,Espl1,Tacc3,Dlc1,Fbxo5,Kif11,Map6d1,Dock2,Nedd1,Tln1,Arhgef18,Nuf2
GO:0042108	8,7,6,5	positive regulation of cytokine biosynthetic process	36	0.0025	4	0.0058	0.0617372	E	Tlr3,Myd88,Cebpg,Cd1d1
GO:0065003	4	macromolecular complex assembly	327	0.0223	19	0.0275	0.0622767	E	Scin,Psrc1,H2afv,Cep57,Map3k1,Smn1,Gemin6,Fbxo5,P2rx7,Ache,Hist1h2ab,Pex13,Sip1,Chrna3,Rrm2,Cenpa,Tube1,Tfam,Brf2
GO:0046649	5,4	lymphocyte activation	264	0.018	16	0.0232	0.062435	E	Hdac9,Impdh2,Ap3d1,Swap70,Il11ra1,Tshr,P2rx7,Atp7a,Cebpg,H60b,Dock2,Pknox1,Ccnd3,H60a,Cd1d1,Il7
GO:0042391	8,6	regulation of membrane potential	105	0.0072	8	0.0116	0.0624545	E	Hcn2,Gclc,Scn1a,P2rx7,Chrna3,Cacna1g,Chrnb4,Cacna1i
GO:0050793	4,3	regulation of developmental process	888	0.0606	43	0.0623	0.0630591	E	Tgif1,Angpt2,Casp8,Hdac9,Xrcc2,Nrp1,Kcnip3,Cenpe,Xpa,Dbh,Btg2,Gclc,Ap3d1,Tgfb3,Gnas,Chst11,Gja1,Stil,Srf,Uaca,P2rx7,Atp7a,Cebpg,Vdr,Birc3,Mitf,Ngfr,Chrna3,Plxna3,Enpp1,Rb1cc1,Ddx20,Lbx1,H60a,Cd1d1,Mmp9,Luc7l,Irak3,Il7,Wwox,Arhgef18,Wwtr1,Bmf
GO:0006629	4	lipid metabolic process	664	0.0453	34	0.0493	0.0631453	E	Aldh5a1,Cyp39a1,Srd5a1,Gba2,Hsd17b4,Adh5,Lipa,Pctp,Pip4k2a,Prkag2,Acadl,Abca2,Lss,Etnk2,Ptgs1,Chka,Scp2,Vav3,Ppap2a,Sc5d,P2rx7,Pik3cb,Osbpl1a,Sc4mol,Pld3,Pex13,Adipor2,Pld4,Nsdhl,Pigl,B4galt6,Chpt1,Alox15,Soat1
GO:0006749	6,5	glutathione metabolic process	22	0.0015	3	0.0043	0.0642024	E	Aldh5a1,Gclc,Gstk1
GO:0010038	5	response to metal ion	22	0.0015	3	0.0043	0.0642024	E	P2rx7,Atp7a,Cacna1g
GO:0048873	7,6,5	homeostasis of number of cells within a tissue	22	0.0015	3	0.0043	0.0642024	E	Lipa,P2rx7,Il7
GO:0022618	6,4,5	ribonucleoprotein complex assembly	22	0.0015	3	0.0043	0.0642024	E	Smn1,Gemin6,Sip1
GO:0006399	8,7	tRNA metabolic process	106	0.0072	8	0.0116	0.0643874	E	Rpp14,Qtrtd1,Adat2,Trpt1,Rpp40,Mettl1,Trit1,Rpp21
GO:0002376	2	immune system process	794	0.0542	39	0.0565	0.0647372	E	Casp8,Hdac9,Bcap31,Impdh2,Mfsd7b,AY036118,Dbh,Rtkn2,Ly96,Cplx2,Il1rap,Ap3d1,Swap70,Tacc3,Gnas,Abcc9,Tlr3,Il11ra1,Ttc7,Tshr,P2rx7,Atp7a,Myd88,Cebpg,Mitf,H60b,Dock2,Enpp1,Pknox1,Oas1b,Plscr1,Ccnd3,Nfkb2,H60a,Itga1,Cd1d1,Irak3,Il7,Cxcl10
GO:0055082	6,4	cellular chemical homeostasis	225	0.0153	14	0.0203	0.0648127	E	Hcn2,Gclc,Scn1a,Ttc7,P2rx7,Pik3cb,Atp7a,Vdr,Gpr12,Chrna3,Slc24a2,Cacna1g,Chrnb4,Cacna1i
GO:0043405	11,8,10	regulation of MAP kinase activity	70	0.0048	6	0.0087	0.0650802	E	Map3k1,Dusp19,Ceacam1,P2rx7,Frs2,Irak3
GO:0030030	3	cell projection organization	331	0.0226	19	0.0275	0.0651922	E	Etv1,Foxd1,Dclk1,Nrp1,Slit2,Slit1,Vav3,Tgfb3,P2rx7,Slit3,Atp7a,Ift172,Dync2li1,Ank3,Ngfr,Chrna3,Plxna3,Prkg1,Wwtr1
GO:0048858	4,5,6,7	cell projection morphogenesis	205	0.014	13	0.0188	0.0653898	E	Etv1,Foxd1,Dclk1,Nrp1,Slit2,Slit1,Slit3,Atp7a,Ank3,Ngfr,Chrna3,Plxna3,Wwtr1
GO:0008219	3	cell death	773	0.0527	38	0.0551	0.0655034	E	Rhob,Casp8,Bcap31,Xrcc2,Kcnip3,Sgk1,Xpa,Dbh,Map3k1,Btg2,Gclc,Tgfb3,Chst11,Stil,Ppp1r15a,Stk17b,Uaca,P2rx7,Atp7a,Cebpg,Vdr,Bub1b,Birc3,Mitf,Ngfr,Faim2,Rb1cc1,Ddx20,Traf7,H60a,Cd1d1,Mmp9,Irak3,Il7,Wwox,Phlpp1,Bmf,Trib3
GO:0030258	5,6	lipid modification	37	0.0025	4	0.0058	0.0659732	E	Hsd17b4,Pik3cb,Pex13,Adipor2
GO:0048646	3,5,4	anatomical structure formation involved in morphogenesis	354	0.0241	20	0.029	0.0661089	E	Tgif1,Tbx20,Rhob,Angpt2,Txnrd1,Casp8,Nrp1,Bmpr2,Fzd3,Stil,Dlc1,Pax3,Srf,Atp7a,Ift172,Frs2,Plxnd1,Pknox1,Adra2b,Gata3
GO:0045321	4,3	leukocyte activation	290	0.0198	17	0.0246	0.0666706	E	Hdac9,Impdh2,Cplx2,Ap3d1,Swap70,Il11ra1,Tshr,P2rx7,Atp7a,Cebpg,H60b,Dock2,Pknox1,Ccnd3,H60a,Cd1d1,Il7
GO:0016265	2	death	782	0.0533	38	0.0551	0.0666757	E	Rhob,Casp8,Bcap31,Xrcc2,Kcnip3,Sgk1,Xpa,Dbh,Map3k1,Btg2,Gclc,Tgfb3,Chst11,Stil,Ppp1r15a,Stk17b,Uaca,P2rx7,Atp7a,Cebpg,Vdr,Bub1b,Birc3,Mitf,Ngfr,Faim2,Rb1cc1,Ddx20,Traf7,H60a,Cd1d1,Mmp9,Irak3,Il7,Wwox,Phlpp1,Bmf,Trib3
GO:0001916	7,11,12,8,10,9,5,6	positive regulation of T cell mediated cytotoxicity	10	0.0007	2	0.0029	0.0677677	E	P2rx7,Cd1d1
GO:0051180	4,5	vitamin transport	10	0.0007	2	0.0029	0.0677677	E	Tcn2,Slc22a21
GO:0007098	8,6,5,4,7	centrosome cycle	10	0.0007	2	0.0029	0.0677677	E	Nde1,Kif11
GO:0051647	5	nucleus localization	10	0.0007	2	0.0029	0.0677677	E	Slit1,Tacc3
GO:0048146	7,5,6	positive regulation of fibroblast proliferation	10	0.0007	2	0.0029	0.0677677	E	Tgif1,Ngfr
GO:0032642	6,5	regulation of chemokine production	10	0.0007	2	0.0029	0.0677677	E	Tlr3,Myd88
GO:0007009	4	plasma membrane organization	10	0.0007	2	0.0029	0.0677677	E	P2rx7,Syt7
GO:0032602	4	chemokine production	10	0.0007	2	0.0029	0.0677677	E	Tlr3,Myd88
GO:0002221	10,9,11,8,6	pattern recognition receptor signaling pathway	10	0.0007	2	0.0029	0.0677677	E	Myd88,Irak3
GO:0001833	4,6,5,9,10	inner cell mass cell proliferation	10	0.0007	2	0.0029	0.0677677	E	Ncapg2,Gins1
GO:0051181	4,5	cofactor transport	10	0.0007	2	0.0029	0.0677677	E	P2rx7,Slc22a21
GO:0006979	4	response to oxidative stress	54	0.0037	5	0.0072	0.0687509	E	Srxn1,Xpa,Ptgs1,Txnip,Nqo1
GO:0044242	5,6	cellular lipid catabolic process	54	0.0037	5	0.0072	0.0687509	E	Aldh5a1,Cyp39a1,Gba2,Hsd17b4,Pex13
GO:0035148	4,6,5	tube lumen formation	54	0.0037	5	0.0072	0.0687509	E	Tgif1,Fzd3,Stil,Dlc1,Pax3
GO:0003015	5	heart process	54	0.0037	5	0.0072	0.0687509	E	Glp1r,Th,Gja1,Cacna1b,Cacna1g
GO:0060047	6	heart contraction	54	0.0037	5	0.0072	0.0687509	E	Glp1r,Th,Gja1,Cacna1b,Cacna1g
GO:0001568	6,7	blood vessel development	250	0.0171	15	0.0217	0.0689078	E	Tbx20,Rhob,Angpt2,Casp8,Mkl2,Nrp1,Dbh,Gja1,Atp7a,Chd7,Plxnd1,Pknox1,Esx1,Nsdhl,Adra2b
GO:0042221	3	response to chemical stimulus	695	0.0474	34	0.0493	0.0698209	E	Adh5,Rad54l,P2rx3,Srxn1,Nos1,Sgk1,Accn2,Xpa,Dbh,Slit2,Ptgs1,Gclc,Gnas,Tlr3,Ppp1r15a,Txnip,P2rx7,Eif4a2,Atp7a,Nqo1,Edem3,Myd88,Dock2,Adipor2,Chrna3,Plxna3,Cacna1g,Itga1,Irak3,Chrnb4,Ptpn2,Cxcl10,Chrna5,Rad54b
GO:0016331	6,8,7,9,5	morphogenesis of embryonic epithelium	90	0.0061	7	0.0101	0.0698721	E	Tgif1,Casp8,Fzd3,Stil,Dlc1,Pax3,Ift172
GO:0000165	8,7	MAPKKK cascade	148	0.0101	10	0.0145	0.0701123	E	Nrbp1,Map3k1,Dusp19,Tlr3,P2rx7,Myd88,Frs2,Rb1cc1,Traf7,Adra2b
GO:0032680	6,5	regulation of tumor necrosis factor production	23	0.0016	3	0.0043	0.0703674	E	Tlr3,Myd88,Irak3
GO:0031343	5,3,4	positive regulation of cell killing	23	0.0016	3	0.0043	0.0703674	E	P2rx7,H60a,Cd1d1
GO:0001912	6,7,8,4,5	positive regulation of leukocyte mediated cytotoxicity	23	0.0016	3	0.0043	0.0703674	E	P2rx7,H60a,Cd1d1
GO:0001569	5,7,8,9,10,6	patterning of blood vessels	23	0.0016	3	0.0043	0.0703674	E	Tbx20,Nrp1,Plxnd1
GO:0032640	4	tumor necrosis factor production	23	0.0016	3	0.0043	0.0703674	E	Tlr3,Myd88,Irak3
GO:0048675	7,9,8,12,10,13,11	axon extension	23	0.0016	3	0.0043	0.0703674	E	Dclk1,Nrp1,Plxna3
GO:0045893	9,8,10,7,6	positive regulation of transcription, DNA-dependent	361	0.0246	20	0.029	0.0706594	E	Foxd1,Tbx20,Psrc1,Nufip1,Mkl2,Top2a,Nfib,Tgfb3,Sox11,Pax3,Srf,Nfix,Arntl,Mitf,Rbpjl,Pknox1,Nfyc,Usp21,Wwtr1,Gata3
GO:0006468	9,7,8	protein amino acid phosphorylation	674	0.046	33	0.0478	0.0707919	E	Dclk1,Aurkb,Nrbp1,Bmpr2,Sgk1,Chek2,Melk,Mst1r,Map3k1,Ttk,Chek1,Ksr2,Ccnb1,Cdc7,Stk17b,Prkd2,P2rx7,Pask,Nek2,Adrbk2,Scyl3,Bub1b,Frs2,Ick,Rb1cc1,Mapkapk2,Irak3,Prkg1,Phkg2,Nek4,Acvr1b,Trib3,Ptpre
GO:0051254	8,7,6,5	positive regulation of RNA metabolic process	362	0.0247	20	0.029	0.0712868	E	Foxd1,Tbx20,Psrc1,Nufip1,Mkl2,Top2a,Nfib,Tgfb3,Sox11,Pax3,Srf,Nfix,Arntl,Mitf,Rbpjl,Pknox1,Nfyc,Usp21,Wwtr1,Gata3
GO:0006605	7,6,8	protein targeting	129	0.0088	9	0.013	0.0713767	E	Pkia,Cep57,Rpain,Mtx2,Tacc3,Uaca,Arntl,Pex13,Folr1
GO:0006665	6,7	sphingolipid metabolic process	55	0.0038	5	0.0072	0.072079	E	Aldh5a1,Gba2,Ppap2a,P2rx7,B4galt6
GO:0021915	4,6,7	neural tube development	91	0.0062	7	0.0101	0.0721462	E	Tgif1,Casp8,Fzd3,Stil,Dlc1,Pax3,Ift172
GO:0006357	9,8,10,7	regulation of transcription from RNA polymerase II promoter	552	0.0377	28	0.0406	0.0724529	E	Pkia,Foxd1,Tgif1,Nufip1,Hdac9,Mkl2,Kcnip3,Top2a,Nfib,Tcfcp2,Zfp238,E2f6,Tgfb3,Sox11,Pax3,Srf,Nfix,Arntl,Cebpg,Mitf,Pknox1,Ddx20,Lbx1,Ifnar2,Brip1,Zhx2,Wwtr1,Gata3
GO:0008610	4,5	lipid biosynthetic process	276	0.0188	16	0.0232	0.0729841	E	Cyp39a1,Srd5a1,Prkag2,Lss,Etnk2,Ptgs1,Chka,Ppap2a,Sc5d,P2rx7,Sc4mol,Nsdhl,Pigl,B4galt6,Chpt1,Alox15
GO:0010033	4	response to organic substance	73	0.005	6	0.0087	0.0731581	E	P2rx3,Dbh,P2rx7,Chrna3,Chrnb4,Chrna5
GO:0048699	6,7	generation of neurons	458	0.0312	24	0.0348	0.0734013	E	Etv1,Foxd1,Tgif1,Nde1,Dclk1,Xrcc2,Farp2,Nrp1,Slit2,Btg2,Slit1,Th,Gja1,Pax3,Slit3,Atp7a,Frs2,Pex13,Ank3,Ngfr,Chrna3,Plxna3,Lbx1,Prkg1
GO:0009888	5,6,4	tissue development	637	0.0435	31	0.0449	0.073575	E	Foxd1,Tgif1,Angpt2,Txnrd1,Casp8,Hdac9,Mkl2,Nrp1,Bmpr2,Fzd3,Flnb,Fbxw4,Gnas,Chst11,Gja1,Stil,Dlc1,Il11ra1,Pax3,P2rx7,Atp7a,Ift172,Vdr,Frs2,Mesdc2,Plxnd1,Ngfr,Nsdhl,Luc7l,Alox15,Acvr1b
GO:0001944	5,6	vasculature development	255	0.0174	15	0.0217	0.0735855	E	Tbx20,Rhob,Angpt2,Casp8,Mkl2,Nrp1,Dbh,Gja1,Atp7a,Chd7,Plxnd1,Pknox1,Esx1,Nsdhl,Adra2b
GO:0006396	7,6,5	RNA processing	389	0.0265	21	0.0304	0.0738248	E	Rbm39,Rpp14,Smn1,Qtrtd1,Gemin6,Adat2,Utp14a,Snrnp48,Trpt1,Exosc8,Rpp40,Isy1,Mettl1,Sip1,Trit1,Ddx20,Rpp21,Rbm17,Wdr12,Tra2b,Plrg1
GO:0010646	5,4	regulation of cell communication	585	0.0399	29	0.042	0.074236	E	Tgif1,P2rx3,Farp2,Lrp1,Map3k1,Tmod2,Rgs17,Vav3,Wdr67,E130306D19Rik,Chst11,Tlr3,Glud1,Ncam1,P2rx7,Ache,Myd88,Rgs10,Garnl3,Dock2,Ngfr,Chrna3,Slc24a2,Rasa3,Traf7,Tbc1d9,Nlgn2,Irak3,Arhgef18
GO:0032990	4,5,6	cell part morphogenesis	213	0.0145	13	0.0188	0.0743707	E	Etv1,Foxd1,Dclk1,Nrp1,Slit2,Slit1,Slit3,Atp7a,Ank3,Ngfr,Chrna3,Plxna3,Wwtr1
GO:0051223	7,6,5	regulation of protein transport	39	0.0027	4	0.0058	0.0746329	E	Pkia,Tacc3,Uaca,P2rx7
GO:0009064	6,7	glutamine family amino acid metabolic process	39	0.0027	4	0.0058	0.0746329	E	Aldh5a1,Ctps,Ddah2,Got2
GO:0042035	7,6,5	regulation of cytokine biosynthetic process	56	0.0038	5	0.0072	0.0754333	E	Tlr3,Myd88,Cebpg,Cd1d1,Gata3
GO:0022008	5,6	neurogenesis	489	0.0334	25	0.0362	0.0759658	E	Etv1,Foxd1,Tgif1,Nde1,Dclk1,Xrcc2,Farp2,Nrp1,Slit2,Btg2,Slit1,Th,Tacc3,Gja1,Pax3,Slit3,Atp7a,Frs2,Pex13,Ank3,Ngfr,Chrna3,Plxna3,Lbx1,Prkg1
GO:0043279	5	response to alkaloid	24	0.0016	3	0.0043	0.076645	E	Chrna3,Chrnb4,Chrna5
GO:0032386	6,5	regulation of intracellular transport	24	0.0016	3	0.0043	0.076645	E	Pkia,Tacc3,Uaca
GO:0051247	7,6,5	positive regulation of protein metabolic process	93	0.0063	7	0.0101	0.0767109	E	Psrc1,Bmpr2,Map3k1,Gclc,P2rx7,Atg10,Rb1cc1
GO:0016192	3,4,5	vesicle-mediated transport	419	0.0286	22	0.0319	0.0771133	E	Ap4m1,Sv2b,Bcap31,Lrp1,Arf2,Gabarapl2,Napb,Unc13a,Cplx2,Vav3,Ap3d1,Rufy1,Mcfd2,Arf5,P2rx7,Ache,Stx18,Cplx1,Mfge8,Vamp1,Muted,Copz2
GO:0006366	9,7,8	transcription from RNA polymerase II promoter	586	0.04	28	0.0406	0.0783727	E	Pkia,Foxd1,Tgif1,Nufip1,Hdac9,Mkl2,Kcnip3,Top2a,Nfib,Tcfcp2,Zfp238,E2f6,Tgfb3,Sox11,Pax3,Srf,Nfix,Arntl,Cebpg,Mitf,Pknox1,Ddx20,Lbx1,Ifnar2,Brip1,Zhx2,Wwtr1,Gata3
GO:0032984	4	macromolecular complex disassembly	57	0.0039	5	0.0072	0.0788078	E	Scin,Cebpg,Map6d1,Nedd1,Irak3
GO:0006643	5,6	membrane lipid metabolic process	57	0.0039	5	0.0072	0.0788078	E	Aldh5a1,Gba2,Ppap2a,P2rx7,B4galt6
GO:0032673	6,5	regulation of interleukin-4 production	11	0.0008	2	0.0029	0.0789372	E	Cd1d1,Gata3
GO:0051297	7,5,6	centrosome organization	11	0.0008	2	0.0029	0.0789372	E	Nde1,Kif11
GO:0032273	8,9,7,6,5	positive regulation of protein polymerization	11	0.0008	2	0.0029	0.0789372	E	Psrc1,Map3k1
GO:0006298	8,7	mismatch repair	11	0.0008	2	0.0029	0.0789372	E	Pms1,Tdg
GO:0006349	8,5,7	genetic imprinting	11	0.0008	2	0.0029	0.0789372	E	Eed,Ctcf
GO:0032633	4	interleukin-4 production	11	0.0008	2	0.0029	0.0789372	E	Cd1d1,Gata3
GO:0031334	6,7,5,4	positive regulation of protein complex assembly	11	0.0008	2	0.0029	0.0789372	E	Psrc1,Map3k1
GO:0045860	11,8,10	positive regulation of protein kinase activity	94	0.0064	7	0.0101	0.0789966	E	Cenpe,Map3k1,Ceacam1,P2rx7,Cdc25b,Frs2,Chrna3
GO:0001906	2	cell killing	40	0.0027	4	0.0058	0.0790344	E	P2rx7,Cebpg,H60a,Cd1d1
GO:0001909	3,4,5	leukocyte mediated cytotoxicity	40	0.0027	4	0.0058	0.0790344	E	P2rx7,Cebpg,H60a,Cd1d1
GO:0002237	5,4,6	response to molecule of bacterial origin	40	0.0027	4	0.0058	0.0790344	E	Adh5,P2rx7,Myd88,Irak3
GO:0033673	10,7,9	negative regulation of kinase activity	40	0.0027	4	0.0058	0.0790344	E	Pkia,Dusp19,Irak3,Trib3
GO:0006469	11,8,10	negative regulation of protein kinase activity	40	0.0027	4	0.0058	0.0790344	E	Pkia,Dusp19,Irak3,Trib3
GO:0045935	7,5,6	positive regulation of nucleobase, nucleoside, nucleotide and nucleic acid metabolic process	424	0.0289	22	0.0319	0.0792588	E	Etv1,Foxd1,Tbx20,Psrc1,Nufip1,Mkl2,Top2a,Nfib,Tgfb3,Sox11,Pax3,Srf,Nfix,Arntl,Cebpg,Mitf,Rbpjl,Pknox1,Nfyc,Usp21,Wwtr1,Gata3
GO:0001817	5,4	regulation of cytokine production	114	0.0078	8	0.0116	0.0800258	E	Tlr3,P2rx7,Myd88,Cebpg,H60a,Cd1d1,Irak3,Gata3
GO:0008202	5,6	steroid metabolic process	155	0.0106	10	0.0145	0.080683	E	Cyp39a1,Srd5a1,Pctp,Abca2,Lss,Sc5d,Osbpl1a,Sc4mol,Nsdhl,Soat1
GO:0034660	7,6	ncRNA metabolic process	176	0.012	11	0.0159	0.0807634	E	Rpp14,Qtrtd1,Adat2,Utp14a,Trpt1,Exosc8,Rpp40,Mettl1,Trit1,Rpp21,Wdr12
GO:0002009	7,6,8,5	morphogenesis of an epithelium	219	0.0149	13	0.0188	0.08085	E	Foxd1,Tgif1,Casp8,Nrp1,Fzd3,Gja1,Stil,Dlc1,Pax3,Ift172,Vdr,Frs2,Plxnd1
GO:0060429	6,7,5	epithelium development	219	0.0149	13	0.0188	0.08085	E	Foxd1,Tgif1,Casp8,Nrp1,Fzd3,Gja1,Stil,Dlc1,Pax3,Ift172,Vdr,Frs2,Plxnd1
GO:0045941	8,9,6,7	positive regulation of transcription	404	0.0276	21	0.0304	0.0811581	E	Etv1,Foxd1,Tbx20,Psrc1,Nufip1,Mkl2,Top2a,Nfib,Tgfb3,Sox11,Pax3,Srf,Nfix,Arntl,Mitf,Rbpjl,Pknox1,Nfyc,Usp21,Wwtr1,Gata3
GO:0048812	5,7,6,10,8,11,9	neuron projection morphogenesis	198	0.0135	12	0.0174	0.0815888	E	Etv1,Foxd1,Dclk1,Nrp1,Slit2,Slit1,Slit3,Atp7a,Ank3,Ngfr,Chrna3,Plxna3
GO:0006323	3	DNA packaging	115	0.0078	8	0.0116	0.0819761	E	Ncapg2,H2afv,Top2a,Ncapd2,Smc4,Hist1h2ab,Ncaph,Cenpa
GO:0048729	6,5,7,4	tissue morphogenesis	311	0.0212	17	0.0246	0.0825225	E	Foxd1,Tgif1,Txnrd1,Casp8,Nrp1,Bmpr2,Fzd3,Gja1,Stil,Dlc1,Pax3,Atp7a,Ift172,Vdr,Frs2,Plxnd1,Ngfr
GO:0042733	8,6,7,5	embryonic digit morphogenesis	25	0.0017	3	0.0043	0.0830081	E	Mfsd7b,Fbxw4,Chst11
GO:0009798	5,4	axis specification	25	0.0017	3	0.0043	0.0830081	E	Stil,Frs2,Pcsk6
GO:0012502	8,6,7	induction of programmed cell death	157	0.0107	10	0.0145	0.0836425	E	Xpa,Tgfb3,Uaca,P2rx7,Cebpg,Ngfr,Ddx20,H60a,Cd1d1,Wwox
GO:0006917	9,7,8	induction of apoptosis	157	0.0107	10	0.0145	0.0836425	E	Xpa,Tgfb3,Uaca,P2rx7,Cebpg,Ngfr,Ddx20,H60a,Cd1d1,Wwox
GO:0070647	8,7	protein modification by small protein conjugation or removal	77	0.0053	6	0.0087	0.0840816	E	Gclc,Nsmce2,Ube4a,Uhrf2,Ube2f,Usp21
GO:0006694	6,5,7	steroid biosynthetic process	77	0.0053	6	0.0087	0.0840816	E	Cyp39a1,Srd5a1,Lss,Sc5d,Sc4mol,Nsdhl
GO:0009966	6,5	regulation of signal transduction	501	0.0342	24	0.0348	0.0843128	E	Tgif1,Farp2,Lrp1,Map3k1,Tmod2,Rgs17,Vav3,Wdr67,E130306D19Rik,Chst11,Tlr3,Ncam1,P2rx7,Ache,Myd88,Rgs10,Garnl3,Dock2,Ngfr,Rasa3,Traf7,Tbc1d9,Irak3,Arhgef18
GO:0010628	7,5,6	positive regulation of gene expression	413	0.0282	21	0.0304	0.0846117	E	Etv1,Foxd1,Tbx20,Psrc1,Nufip1,Mkl2,Top2a,Nfib,Tgfb3,Sox11,Pax3,Srf,Nfix,Arntl,Mitf,Rbpjl,Pknox1,Nfyc,Usp21,Wwtr1,Gata3
GO:0048667	6,9,7,10,8	cell morphogenesis involved in neuron differentiation	201	0.0137	12	0.0174	0.0850511	E	Etv1,Foxd1,Dclk1,Nrp1,Slit2,Slit1,Slit3,Atp7a,Ank3,Ngfr,Chrna3,Plxna3
GO:0006730	4	one-carbon compound metabolic process	97	0.0066	7	0.0101	0.0858381	E	Adh5,Btg2,Eed,Ctcf,Suv39h2,Car6,Ahcyl1
GO:0022613	3	ribonucleoprotein complex biogenesis	117	0.008	8	0.0116	0.0858546	E	Isg20l2,Smn1,Gemin6,Utp14a,Exosc8,Sip1,Nop58,Wdr12
GO:0019725	5,3	cellular homeostasis	293	0.02	16	0.0232	0.0861768	E	Txnrd1,Hcn2,Gclc,Scn1a,Ttc7,Srf,P2rx7,Pik3cb,Atp7a,Vdr,Gpr12,Chrna3,Slc24a2,Cacna1g,Chrnb4,Cacna1i
GO:0009611	4	response to wounding	341	0.0233	18	0.0261	0.0861942	E	Hdac9,Lipa,F2rl2,Mst1,Map3k1,Cnr2,Ly96,Gja1,Tlr3,F13a1,Uaca,P2rx7,Pik3cb,Myd88,Scn9a,Saal1,Syt7,Cxcl10
GO:0009607	3	response to biotic stimulus	270	0.0184	15	0.0217	0.0864259	E	Adh5,Abcc9,Tlr3,Ppp1r15a,P2rx7,Edem3,Myd88,Zc3hav1,Oas1b,Plscr1,H60a,Irak3,Cotl1,Ifna14,Fv1
GO:0050801	6	ion homeostasis	248	0.0169	14	0.0203	0.0872712	E	Hcn2,Gclc,Scn1a,Ttc7,P2rx7,Pik3cb,Atp7a,Vdr,Gpr12,Chrna3,Slc24a2,Cacna1g,Chrnb4,Cacna1i
GO:0051348	6	negative regulation of transferase activity	42	0.0029	4	0.0058	0.0879258	E	Pkia,Dusp19,Irak3,Trib3
GO:0042060	5	wound healing	98	0.0067	7	0.0101	0.0881053	E	F2rl2,Mst1,Map3k1,Gja1,F13a1,Pik3cb,Syt7
GO:0006869	4,5	lipid transport	98	0.0067	7	0.0101	0.0881053	E	Pctp,Pltp,Scp2,P2rx7,Osbpl1a,Got2,Spns2
GO:0032649	6,5	regulation of interferon-gamma production	26	0.0018	3	0.0043	0.0894301	E	Cebpg,H60a,Cd1d1
GO:0051923	5	sulfation	2	0.0001	1	0.0014	0.0897151	E	Hs3st3b1
GO:0018318	9,10	protein amino acid palmitoylation	2	0.0001	1	0.0014	0.0897151	E	Map6d1
GO:0006587	10,9,8,7	serotonin biosynthetic process from tryptophan	2	0.0001	1	0.0014	0.0897151	E	Tph1
GO:0051133	10,9,8	regulation of NK T cell activation	2	0.0001	1	0.0014	0.0897151	E	Cd1d1
GO:0008291	6,8,9,5	acetylcholine metabolic process	2	0.0001	1	0.0014	0.0897151	E	Ache
GO:0042427	9,8,7	serotonin biosynthetic process	2	0.0001	1	0.0014	0.0897151	E	Tph1
GO:0045683	6,8,9,7,10,4,5	negative regulation of epidermis development	2	0.0001	1	0.0014	0.0897151	E	Ngfr
GO:0046114	10	guanosine biosynthetic process	2	0.0001	1	0.0014	0.0897151	E	Qtrtd1
GO:0001767	7,6,8,5,9	establishment of lymphocyte polarity	2	0.0001	1	0.0014	0.0897151	E	Dock2
GO:0032892	6,7,5,4	positive regulation of organic acid transport	2	0.0001	1	0.0014	0.0897151	E	P2rx7
GO:0051299	9,8,7,6,5	centrosome separation	2	0.0001	1	0.0014	0.0897151	E	Kif11
GO:0060151	5	peroxisome localization	2	0.0001	1	0.0014	0.0897151	E	Pex13
GO:0019551	9,10,6,8	glutamate catabolic process to 2-oxoglutarate	2	0.0001	1	0.0014	0.0897151	E	Got2
GO:0006772	7	thiamin metabolic process	2	0.0001	1	0.0014	0.0897151	E	Tpk1
GO:0051602	4	response to electrical stimulus	2	0.0001	1	0.0014	0.0897151	E	P2rx7
GO:0002268	5	follicular dendritic cell differentiation	2	0.0001	1	0.0014	0.0897151	E	Nfkb2
GO:0044268	6,5	multicellular organismal protein metabolic process	2	0.0001	1	0.0014	0.0897151	E	P2rx7
GO:0006477	9,6,8	protein amino acid sulfation	2	0.0001	1	0.0014	0.0897151	E	Hs3st3b1
GO:0008618	10	7-methylguanosine metabolic process	2	0.0001	1	0.0014	0.0897151	E	Qtrtd1
GO:0030573	7,8	bile acid catabolic process	2	0.0001	1	0.0014	0.0897151	E	Cyp39a1
GO:0006532	8,9	aspartate biosynthetic process	2	0.0001	1	0.0014	0.0897151	E	Got2
GO:0046118	11	7-methylguanosine biosynthetic process	2	0.0001	1	0.0014	0.0897151	E	Qtrtd1
GO:0006105	7	succinate metabolic process	2	0.0001	1	0.0014	0.0897151	E	Aldh5a1
GO:0034121	12,7,11,5,13,6,10,8,4	regulation of toll-like receptor signaling pathway	2	0.0001	1	0.0014	0.0897151	E	Irak3
GO:0010389	7,9,6,8,5	regulation of G2/M transition of mitotic cell cycle	2	0.0001	1	0.0014	0.0897151	E	Pkia
GO:0001561	7,8,9	fatty acid alpha-oxidation	2	0.0001	1	0.0014	0.0897151	E	Pex13
GO:0015870	5,6	acetylcholine transport	2	0.0001	1	0.0014	0.0897151	E	Chrna3
GO:0035022	10,11,9,8	positive regulation of Rac protein signal transduction	2	0.0001	1	0.0014	0.0897151	E	Dock2
GO:0001771	6,5	formation of immunological synapse	2	0.0001	1	0.0014	0.0897151	E	Dock2
GO:0051491	7,8,6,5	positive regulation of filopodium assembly	2	0.0001	1	0.0014	0.0897151	E	Tgfb3
GO:0006702	8,7,6,5	androgen biosynthetic process	2	0.0001	1	0.0014	0.0897151	E	Srd5a1
GO:0042488	7,8,9,10,5,6	positive regulation of odontogenesis of dentine-containing tooth	2	0.0001	1	0.0014	0.0897151	E	Ngfr
GO:0001743	4,6,5	optic placode formation	2	0.0001	1	0.0014	0.0897151	E	Frs2
GO:0015819	7,8,9	lysine transport	2	0.0001	1	0.0014	0.0897151	E	Slc7a3
GO:0034122	8,6,12,13,11,7,14,10,9,4,5	negative regulation of toll-like receptor signaling pathway	2	0.0001	1	0.0014	0.0897151	E	Irak3
GO:0001768	8,7,9,6,10	establishment of T cell polarity	2	0.0001	1	0.0014	0.0897151	E	Dock2
GO:0014054	6,8,7,9,5,4,10,11,12	positive regulation of gamma-aminobutyric acid secretion	2	0.0001	1	0.0014	0.0897151	E	P2rx7
GO:0007100	10,9,8,7,6	mitotic centrosome separation	2	0.0001	1	0.0014	0.0897151	E	Kif11
GO:0015889	5,6	cobalamin transport	2	0.0001	1	0.0014	0.0897151	E	Tcn2
GO:0015684	8,9,10	ferrous iron transport	2	0.0001	1	0.0014	0.0897151	E	Mmgt1
GO:0051132	8,7	NK T cell activation	2	0.0001	1	0.0014	0.0897151	E	Cd1d1
GO:0048552	5	regulation of metalloenzyme activity	2	0.0001	1	0.0014	0.0897151	E	Atp7a
GO:0042723	6	thiamin and derivative metabolic process	2	0.0001	1	0.0014	0.0897151	E	Tpk1
GO:0006538	8,9	glutamate catabolic process	2	0.0001	1	0.0014	0.0897151	E	Got2
GO:0006500	9,10,12,11	N-terminal protein palmitoylation	2	0.0001	1	0.0014	0.0897151	E	Map6d1
GO:0051988	8,6,7,10,9,5	regulation of attachment of spindle microtubules to kinetochore	2	0.0001	1	0.0014	0.0897151	E	Cenpe
GO:0051957	7,8,6,9,5	positive regulation of amino acid transport	2	0.0001	1	0.0014	0.0897151	E	P2rx7
GO:0051444	7	negative regulation of ubiquitin-protein ligase activity	2	0.0001	1	0.0014	0.0897151	E	Fbxo5
GO:0048385	7,9,6,8	regulation of retinoic acid receptor signaling pathway	2	0.0001	1	0.0014	0.0897151	E	Tgif1
GO:0042994	10,8,9,11,12,13,7,6	cytoplasmic sequestering of transcription factor	2	0.0001	1	0.0014	0.0897151	E	Tacc3
GO:0042482	6,7,8,9,4,5	positive regulation of odontogenesis	2	0.0001	1	0.0014	0.0897151	E	Ngfr
GO:0008616	12,11,9,10,8	queuosine biosynthetic process	2	0.0001	1	0.0014	0.0897151	E	Qtrtd1
GO:0019550	8,9,10	glutamate catabolic process to aspartate	2	0.0001	1	0.0014	0.0897151	E	Got2
GO:0015732	7,8	prostaglandin transport	2	0.0001	1	0.0014	0.0897151	E	P2rx7
GO:0048554	6	positive regulation of metalloenzyme activity	2	0.0001	1	0.0014	0.0897151	E	Atp7a
GO:0015693	7,8	magnesium ion transport	2	0.0001	1	0.0014	0.0897151	E	Mmgt1
GO:0046116	11	queuosine metabolic process	2	0.0001	1	0.0014	0.0897151	E	Qtrtd1
GO:0033504	4,5,7,8	floor plate development	2	0.0001	1	0.0014	0.0897151	E	Stil
GO:0006083	7	acetate metabolic process	2	0.0001	1	0.0014	0.0897151	E	Aldh5a1
GO:0014052	6,8,7,5,9,10,11	regulation of gamma-aminobutyric acid secretion	2	0.0001	1	0.0014	0.0897151	E	P2rx7
GO:0014048	6,7,5,8	regulation of glutamate secretion	2	0.0001	1	0.0014	0.0897151	E	P2rx7
GO:0007171	7,13,9,10,6,8,12	activation of transmembrane receptor protein tyrosine kinase activity	2	0.0001	1	0.0014	0.0897151	E	Chrna3
GO:0046208	9,8	spermine catabolic process	2	0.0001	1	0.0014	0.0897151	E	Sat1
GO:0006649	6,7	phospholipid transfer to membrane	2	0.0001	1	0.0014	0.0897151	E	P2rx7
GO:0051438	6	regulation of ubiquitin-protein ligase activity	2	0.0001	1	0.0014	0.0897151	E	Fbxo5
GO:0051220	7,9,8,6,5	cytoplasmic sequestering of protein	2	0.0001	1	0.0014	0.0897151	E	Tacc3
GO:0007354	8,7,9,10	zygotic determination of anterior/posterior axis, embryo	2	0.0001	1	0.0014	0.0897151	E	Pcsk6
GO:0046185	5	aldehyde catabolic process	2	0.0001	1	0.0014	0.0897151	E	Adh5
GO:0060152	6,4	microtubule-based peroxisome localization	2	0.0001	1	0.0014	0.0897151	E	Pex13
GO:0051489	7,6,5	regulation of filopodium assembly	2	0.0001	1	0.0014	0.0897151	E	Tgfb3
GO:0014055	6,7,8,9,5	acetylcholine secretion	2	0.0001	1	0.0014	0.0897151	E	Chrna3
GO:0000083	10,9,6,5,7,8,4,11	regulation of transcription of G1/S-phase of mitotic cell cycle	2	0.0001	1	0.0014	0.0897151	E	E2f6
GO:0051799	7,6,9,10,8,11,5,4	negative regulation of hair follicle development	2	0.0001	1	0.0014	0.0897151	E	Ngfr
GO:0040037	8,10,11,7,6,9	negative regulation of fibroblast growth factor receptor signaling pathway	2	0.0001	1	0.0014	0.0897151	E	Ngfr
GO:0002755	12,11,13,10,8	MyD88-dependent toll-like receptor signaling pathway	2	0.0001	1	0.0014	0.0897151	E	Myd88
GO:0051352	6	negative regulation of ligase activity	2	0.0001	1	0.0014	0.0897151	E	Fbxo5
GO:0046619	5,7,8,9,10,6	optic placode formation involved in camera-type eye	2	0.0001	1	0.0014	0.0897151	E	Frs2
GO:0001845	4,7,6,8	phagolysosome formation	2	0.0001	1	0.0014	0.0897151	E	P2rx7
GO:0051135	11,10,9,8	positive regulation of NK T cell activation	2	0.0001	1	0.0014	0.0897151	E	Cd1d1
GO:0002266	4	follicular dendritic cell activation	2	0.0001	1	0.0014	0.0897151	E	Nfkb2
GO:0014056	9,7,8,10,6	regulation of acetylcholine secretion	2	0.0001	1	0.0014	0.0897151	E	Chrna3
GO:0031023	6,4,5	microtubule organizing center organization	12	0.0008	2	0.0029	0.0902755	E	Nde1,Kif11
GO:0009132	8	nucleoside diphosphate metabolic process	12	0.0008	2	0.0029	0.0902755	E	Rrm2,Entpd7
GO:0043330	5	response to exogenous dsRNA	12	0.0008	2	0.0029	0.0902755	E	Tlr3,Irak3
GO:0001914	11,6,9,8,10,5,7	regulation of T cell mediated cytotoxicity	12	0.0008	2	0.0029	0.0902755	E	P2rx7,Cd1d1
GO:0007044	5	cell-substrate junction assembly	12	0.0008	2	0.0029	0.0902755	E	Dlc1,Tln1
GO:0060135	4,5	maternal process involved in female pregnancy	12	0.0008	2	0.0029	0.0902755	E	Il11ra1,Vdr
GO:0021516	4,5,7,8	dorsal spinal cord development	12	0.0008	2	0.0029	0.0902755	E	Pax3,Lbx1
GO:0002028	8,7,9	regulation of sodium ion transport	12	0.0008	2	0.0029	0.0902755	E	Nos1,Sgk1
GO:0002758	9,8,10,7,5	innate immune response-activating signal transduction	12	0.0008	2	0.0029	0.0902755	E	Myd88,Irak3
GO:0006913	7,6	nucleocytoplasmic transport	99	0.0068	7	0.0101	0.0903619	E	Pkia,Cep57,Rpain,Gle1,Tacc3,Uaca,Arntl
GO:0051094	5,3,4	positive regulation of developmental process	377	0.0257	19	0.0275	0.090487	E	Tgif1,Xrcc2,Xpa,Ap3d1,Tgfb3,Gnas,Gja1,Srf,Uaca,P2rx7,Cebpg,Vdr,Ngfr,Ddx20,H60a,Cd1d1,Mmp9,Il7,Wwox
GO:0048514	6,7,8,5	blood vessel morphogenesis	206	0.0141	12	0.0174	0.0905778	E	Tbx20,Rhob,Angpt2,Casp8,Mkl2,Nrp1,Dbh,Gja1,Atp7a,Plxnd1,Pknox1,Adra2b
GO:0034622	5,4	cellular macromolecular complex assembly	276	0.0188	15	0.0217	0.0908677	E	Scin,Psrc1,H2afv,Map3k1,Smn1,Gemin6,Fbxo5,Hist1h2ab,Pex13,Sip1,Chrna3,Cenpa,Tube1,Tfam,Brf2
GO:0031175	4,9,6,10,7	neuron projection development	230	0.0157	13	0.0188	0.0917438	E	Etv1,Foxd1,Dclk1,Nrp1,Slit2,Slit1,Slit3,Atp7a,Ank3,Ngfr,Chrna3,Plxna3,Prkg1
GO:0007611	6,4	learning or memory	80	0.0055	6	0.0087	0.0922628	E	Accn2,Glp1r,Dbh,Tmod2,Th,Slc24a2
GO:0046849	4	bone remodeling	61	0.0042	5	0.0072	0.092392	E	Gnas,P2rx7,Mitf,Enpp1,Il7
GO:0030073	8,6,7,9	insulin secretion	43	0.0029	4	0.0058	0.0923941	E	Glud1,Gpr119,Cplx1,Fam3b
GO:0051169	6,5	nuclear transport	100	0.0068	7	0.0101	0.0926054	E	Pkia,Cep57,Rpain,Gle1,Tacc3,Uaca,Arntl
GO:0048598	5,4	embryonic morphogenesis	358	0.0244	18	0.0261	0.0933804	E	Tgif1,Txnrd1,Casp8,Bmpr2,Fzd3,Mfsd7b,Th,Fbxw4,Gnas,Chst11,Stil,Dlc1,Pax3,Odz4,Ift172,Chd7,Frs2,Muted
GO:0007389	4,3	pattern specification process	280	0.0191	15	0.0217	0.0935576	E	Tgif1,Tbx20,Nrp1,Bmpr2,Btg2,Rttn,Stil,Lfng,Ift172,Dync2li1,Frs2,Plxnd1,Arl13b,Mllt3,Pcsk6
GO:0051128	4,3	regulation of cellular component organization	256	0.0175	14	0.0203	0.0937794	E	Scin,Psrc1,Nrp1,Cenpe,Map3k1,Tgfb3,Rufy1,Mfge8,Map6d1,Chrna3,Plxna3,Irak3,Arhgef18,Ncan
GO:0051674	3	localization of cell	403	0.0275	19	0.0275	0.0946587	E	Etv1,Foxd1,Nde1,Dclk1,Nrp1,Dbh,Map3k1,Slit2,Slit1,Vav3,Gja1,Pax3,Slit3,Pex13,Ank3,Ngfr,Plxna3,Itga1,Prkg1
GO:0006928	3,4	cell motion	403	0.0275	19	0.0275	0.0946587	E	Etv1,Foxd1,Nde1,Dclk1,Nrp1,Dbh,Map3k1,Slit2,Slit1,Vav3,Gja1,Pax3,Slit3,Pex13,Ank3,Ngfr,Plxna3,Itga1,Prkg1
GO:0006631	5,7,6	fatty acid metabolic process	188	0.0128	11	0.0159	0.0957156	E	Aldh5a1,Hsd17b4,Prkag2,Acadl,Ptgs1,Scp2,Sc5d,Sc4mol,Pex13,Adipor2,Alox15
GO:0001764	6,7,8,5	neuron migration	62	0.0042	5	0.0072	0.0957808	E	Nde1,Dclk1,Gja1,Pex13,Prkg1
GO:0000041	7,8	transition metal ion transport	62	0.0042	5	0.0072	0.0957808	E	Trpc7,Atp7a,Mmgt1,Tcn2,Sfxn4
GO:0032675	6,5	regulation of interleukin-6 production	27	0.0018	3	0.0043	0.0958854	E	Tlr3,P2rx7,Irak3
GO:0040007	2	growth	339	0.0231	17	0.0246	0.0964991	E	Ncapg2,Psrc1,Mfsd7b,Plekha1,Etnk2,Igfbp5,Tgfb3,Yeats4,Chst11,Gja1,Stil,Tshr,Chd7,Caprin2,Gins1,Il7,Gas6
GO:0051259	6,5	protein oligomerization	44	0.003	4	0.0058	0.0968633	E	Cep57,P2rx7,Ache,Rrm2
GO:0001649	5,6,8,4	osteoblast differentiation	44	0.003	4	0.0058	0.0968633	E	Igfbp5,Gnas,Wwox,Wwtr1
GO:0055085	3,4,5	transmembrane transport	123	0.0084	8	0.0116	0.0971901	E	Nup43,1700034H14Rik,Gle1,Sec61b,Atp7a,Tmem48,Nup54,Ddx19a
GO:0009791	4,3	post-embryonic development	82	0.0056	6	0.0087	0.0976587	E	Aldh5a1,Plekha1,Etnk2,Gnas,Chst11,Scn9a
GO:0043065	8,6,7	positive regulation of apoptosis	213	0.0145	12	0.0174	0.0976836	E	Xpa,Tgfb3,Uaca,P2rx7,Cebpg,Vdr,Ngfr,Ddx20,H60a,Cd1d1,Mmp9,Wwox
GO:0000902	4,5,6	cell morphogenesis	346	0.0236	17	0.0246	0.0983314	E	Etv1,Foxd1,Dclk1,Lipa,Nrp1,Slit2,Slit1,P2rx7,Slit3,Atp7a,Ank3,Dock2,Ngfr,Chrna3,Plxna3,Arhgef18,Wwtr1
GO:0008380	8,7,6	RNA splicing	191	0.013	11	0.0159	0.0990987	E	Rbm39,Smn1,Gemin6,Snrnp48,Trpt1,Isy1,Sip1,Ddx20,Rbm17,Tra2b,Plrg1
GO:0043068	7,5,6	positive regulation of programmed cell death	215	0.0147	12	0.0174	0.099557	E	Xpa,Tgfb3,Uaca,P2rx7,Cebpg,Vdr,Ngfr,Ddx20,H60a,Cd1d1,Mmp9,Wwox
GO:0032268	6,7,5	regulation of cellular protein metabolic process	291	0.0199	15	0.0217	0.0997011	E	Scin,Psrc1,Eif2c4,Bmpr2,Map3k1,Gclc,Ppp1r15a,P2rx7,Pstk,Ache,Paip2b,Map6d1,Atg10,Ngdn,Rb1cc1
GO:0010942	6,4,5	positive regulation of cell death	216	0.0147	12	0.0174	0.100465	E	Xpa,Tgfb3,Uaca,P2rx7,Cebpg,Vdr,Ngfr,Ddx20,H60a,Cd1d1,Mmp9,Wwox
GO:0016042	4,5	lipid catabolic process	125	0.0085	8	0.0116	0.100825	E	Aldh5a1,Cyp39a1,Gba2,Hsd17b4,Lipa,Pld3,Pex13,Pld4
GO:0010648	6,4,5	negative regulation of cell communication	147	0.01	9	0.013	0.100951	E	Tgif1,Lrp1,Rgs17,Chst11,P2rx7,Rgs10,Ngfr,Slc24a2,Irak3
GO:0001501	5	skeletal system development	294	0.0201	15	0.0217	0.101035	E	Plekha1,Fbxw4,Igfbp5,Gnas,Chst11,P2rx7,Atp7a,Vdr,Enpp1,Mmp9,Wwox,Tuft1,Alox15,Wwtr1,Ltbp3
GO:0032940	5,3,4,6	secretion by cell	217	0.0148	12	0.0174	0.101354	E	Sv2b,Unc13a,Cplx2,Syt1,Glud1,Gpr119,Cacna1b,P2rx7,Cplx1,Fam3b,Chrna3,Gnptab
GO:0006586	7	indolalkylamine metabolic process	13	0.0009	2	0.0029	0.101678	E	Tph1,Atp7a
GO:0001913	10,4,8,9,5,7,6	T cell mediated cytotoxicity	13	0.0009	2	0.0029	0.101678	E	P2rx7,Cd1d1
GO:0034105	6,4,5	positive regulation of tissue remodeling	13	0.0009	2	0.0029	0.101678	E	P2rx7,Vdr
GO:0042434	6	indole derivative metabolic process	13	0.0009	2	0.0029	0.101678	E	Tph1,Atp7a
GO:0042430	5	indole and derivative metabolic process	13	0.0009	2	0.0029	0.101678	E	Tph1,Atp7a
GO:0007019	8,7,6	microtubule depolymerization	13	0.0009	2	0.0029	0.101678	E	Map6d1,Nedd1
GO:0006825	8,9	copper ion transport	13	0.0009	2	0.0029	0.101678	E	Atp7a,Mmgt1
GO:0002218	8,9,4,6,7	activation of innate immune response	13	0.0009	2	0.0029	0.101678	E	Myd88,Irak3
GO:0002711	9,10,7,8	positive regulation of T cell mediated immunity	13	0.0009	2	0.0029	0.101678	E	P2rx7,Cd1d1
GO:0007512	6,7	adult heart development	13	0.0009	2	0.0029	0.101678	E	Gja1,Chd7
GO:0015672	6,7	monovalent inorganic cation transport	297	0.0203	15	0.0217	0.102216	E	Tmem38b,Nos1,Kcnip3,Sgk1,Accn2,Hcn2,Nsf,Abcc9,Atp1b1,Scn1a,Scn9a,Kcnab1,Kcnn3,Kctd3,Kctd2
GO:0016202	6,8,7,9,5	regulation of striated muscle tissue development	28	0.0019	3	0.0043	0.102349	E	Hdac9,Gja1,Luc7l
GO:0048634	5,6,7,4	regulation of muscle development	28	0.0019	3	0.0043	0.102349	E	Hdac9,Gja1,Luc7l
GO:0045089	7,8,5,6	positive regulation of innate immune response	28	0.0019	3	0.0043	0.102349	E	Myd88,H60a,Irak3
GO:0007586	3	digestion	28	0.0019	3	0.0043	0.102349	E	Cyp39a1,P2rx7,Vdr
GO:0043010	7,8	camera-type eye development	126	0.0086	8	0.0116	0.102609	E	Tgif1,Map3k1,Th,Ache,Chd7,Mitf,Frs2,Pknox1
GO:0051707	3,4	response to other organism	220	0.015	12	0.0174	0.103899	E	Adh5,Abcc9,Tlr3,P2rx7,Myd88,Zc3hav1,Oas1b,Plscr1,Irak3,Cotl1,Ifna14,Fv1
GO:0048666	8,5,9,6	neuron development	303	0.0207	15	0.0217	0.104109	E	Etv1,Foxd1,Dclk1,Farp2,Nrp1,Slit2,Slit1,Th,Slit3,Atp7a,Ank3,Ngfr,Chrna3,Plxna3,Prkg1
GO:0032879	4,3	regulation of localization	307	0.0209	15	0.0217	0.105022	E	Pkia,Nrp1,Nos1,Sgk1,Cenpe,Map3k1,Tacc3,Rufy1,Glud1,Uaca,P2rx7,Mfge8,Nedd1,Chrna3,Plxna3
GO:0046903	4,5	secretion	248	0.0169	13	0.0188	0.10548	E	Sv2b,Unc13a,Cplx2,Syt1,Glud1,Gpr119,Cacna1b,P2rx7,Cplx1,Fam3b,Chrna3,Gnptab,Chrnb4
GO:0032787	6	monocarboxylic acid metabolic process	248	0.0169	13	0.0188	0.10548	E	Aldh5a1,Cyp39a1,Hsd17b4,Prkag2,Acadl,Ptgs1,Scp2,Sc5d,Sc4mol,Pex13,Adipor2,Alox15,Folr1
GO:0060341	5,4	regulation of cellular localization	85	0.0058	6	0.0087	0.105598	E	Pkia,Cenpe,Tacc3,Uaca,P2rx7,Chrna3
GO:0007224	7,6	smoothened signaling pathway	46	0.0031	4	0.0058	0.105764	E	Hhat,Stil,Ift172,Nsdhl
GO:0032446	9,8	protein modification by small protein conjugation	65	0.0044	5	0.0072	0.105841	E	Gclc,Nsmce2,Ube4a,Uhrf2,Ube2f
GO:0048878	5	chemical homeostasis	315	0.0215	15	0.0217	0.106009	E	Dbh,Hcn2,Gclc,Scn1a,Ttc7,P2rx7,Pik3cb,Atp7a,Vdr,Gpr12,Chrna3,Slc24a2,Cacna1g,Chrnb4,Cacna1i
GO:0016071	7,6	mRNA metabolic process	280	0.0191	14	0.0203	0.106952	E	Rbm39,Auh,Smn1,Gemin6,Snrnp48,Cebpg,Isy1,Sip1,Ddx20,Rbm17,Mapkapk2,Tra2b,Zhx2,Plrg1
GO:0043623	6,5	cellular protein complex assembly	129	0.0088	8	0.0116	0.107807	E	Scin,Psrc1,Map3k1,Fbxo5,Pex13,Chrna3,Tube1,Tfam
GO:0032635	4	interleukin-6 production	29	0.002	3	0.0043	0.108799	E	Tlr3,P2rx7,Irak3
GO:0001503	5,7,3	ossification	130	0.0089	8	0.0116	0.109484	E	Igfbp5,Gnas,P2rx7,Enpp1,Wwox,Tuft1,Alox15,Wwtr1
GO:0051051	5,6,4,3	negative regulation of transport	47	0.0032	4	0.0058	0.110175	E	Pkia,Nos1,Tacc3,Uaca
GO:0000904	5,6,7	cell morphogenesis involved in differentiation	231	0.0158	12	0.0174	0.111549	E	Etv1,Foxd1,Dclk1,Nrp1,Slit2,Slit1,Slit3,Atp7a,Ank3,Ngfr,Chrna3,Plxna3
GO:0031290	8,10,9,5,13,11,14,12,6	retinal ganglion cell axon guidance	14	0.001	2	0.0029	0.113052	E	Slit2,Slit1
GO:0009620	4,5	response to fungus	14	0.001	2	0.0029	0.113052	E	Myd88,Cotl1
GO:0021879	8,9,6,10	forebrain neuron differentiation	14	0.001	2	0.0029	0.113052	E	Atp7a,Plxna3
GO:0060716	6,5,8,7,9,10	labyrinthine layer blood vessel development	14	0.001	2	0.0029	0.113052	E	Esx1,Nsdhl
GO:0046330	10,9,7,8,11,5,6	positive regulation of JNK cascade	14	0.001	2	0.0029	0.113052	E	Tlr3,Myd88
GO:0060323	6,5,4	head morphogenesis	14	0.001	2	0.0029	0.113052	E	Mfsd7b,Plekha1
GO:0009067	7,8	aspartate family amino acid biosynthetic process	14	0.001	2	0.0029	0.113052	E	Got2,Mri1
GO:0070304	8,6,7,9,4,5	positive regulation of stress-activated protein kinase signaling pathway	14	0.001	2	0.0029	0.113052	E	Tlr3,Myd88
GO:0051952	6,5	regulation of amine transport	14	0.001	2	0.0029	0.113052	E	P2rx7,Chrna3
GO:0046851	7,5,6	negative regulation of bone remodeling	14	0.001	2	0.0029	0.113052	E	P2rx7,Enpp1
GO:0032760	7,5,6	positive regulation of tumor necrosis factor production	14	0.001	2	0.0029	0.113052	E	Tlr3,Myd88
GO:0045061	9,11,12,10,8,4	thymic T cell selection	14	0.001	2	0.0029	0.113052	E	Dock2,Cd1d1
GO:0006732	5	coenzyme metabolic process	133	0.0091	8	0.0116	0.114332	E	Aldh5a1,Mocs2,Scp2,Gclc,Acss2,Gstk1,Tpk1,Folr1
GO:0010638	6,4,5	positive regulation of organelle organization	30	0.002	3	0.0043	0.115211	E	Psrc1,Cenpe,Map3k1
GO:0031341	4,3	regulation of cell killing	30	0.002	3	0.0043	0.115211	E	P2rx7,H60a,Cd1d1
GO:0032609	4	interferon-gamma production	30	0.002	3	0.0043	0.115211	E	Cebpg,H60a,Cd1d1
GO:0009411	6	response to UV	30	0.002	3	0.0043	0.115211	E	Xpa,Rpain,Uaca
GO:0000075	6,5	cell cycle checkpoint	30	0.002	3	0.0043	0.115211	E	Cenpe,Chek1,Nbn
GO:0044272	5	sulfur compound biosynthetic process	30	0.002	3	0.0043	0.115211	E	Gclc,Chst11,Mri1
GO:0001910	5,7,4,6	regulation of leukocyte mediated cytotoxicity	30	0.002	3	0.0043	0.115211	E	P2rx7,H60a,Cd1d1
GO:0030005	9,7	cellular di-, tri-valent inorganic cation homeostasis	111	0.0076	7	0.0101	0.115799	E	Ttc7,P2rx7,Pik3cb,Atp7a,Vdr,Gpr12,Slc24a2
GO:0007169	8,7	transmembrane receptor protein tyrosine kinase signaling pathway	184	0.0126	10	0.0145	0.116662	E	Angpt2,Nrp1,Cep57,Plekha1,Fgf17,Txnip,Frs2,Ngfr,Chrna3,Ptpn2
GO:0006650	6,7	glycerophospholipid metabolic process	69	0.0047	5	0.0072	0.118814	E	Aldh5a1,Pip4k2a,Chka,Pik3cb,Pigl
GO:0006497	7,8	protein amino acid lipidation	49	0.0033	4	0.0058	0.118875	E	Hhat,Map6d1,Atg10,Pigl
GO:0032583	9,8,10,7	regulation of gene-specific transcription	49	0.0033	4	0.0058	0.118875	E	Psrc1,Zfp238,Pknox1,Lbx1
GO:0009063	6,7	cellular amino acid catabolic process	49	0.0033	4	0.0058	0.118875	E	Dbh,Auh,Ddah2,Got2
GO:0043406	12,9,11	positive regulation of MAP kinase activity	49	0.0033	4	0.0058	0.118875	E	Map3k1,Ceacam1,P2rx7,Frs2
GO:0030072	7,5,6,8	peptide hormone secretion	49	0.0033	4	0.0058	0.118875	E	Glud1,Gpr119,Cplx1,Fam3b
GO:0007409	6,8,7,11,9,12,10	axonogenesis	187	0.0128	10	0.0145	0.119189	E	Etv1,Foxd1,Dclk1,Nrp1,Slit2,Slit1,Slit3,Ank3,Ngfr,Plxna3
GO:0010647	6,4,5	positive regulation of cell communication	137	0.0093	8	0.0116	0.120322	E	Tmod2,Tlr3,Ncam1,P2rx7,Myd88,Dock2,Slc24a2,Traf7
GO:0002443	4,5	leukocyte mediated immunity	137	0.0093	8	0.0116	0.120322	E	Dbh,Cplx2,Swap70,P2rx7,Myd88,Cebpg,H60a,Cd1d1
GO:0006936	5	muscle contraction	91	0.0062	6	0.0087	0.12061	E	Tbx20,P2rx3,Nos1,Chrna3,Cacna1g,Chrnb4
GO:0030534	3,4	adult behavior	91	0.0062	6	0.0087	0.12061	E	Dbh,Scn1a,Tshr,Chd7,Chrna3,Chrnb4
GO:0009968	7,6,5	negative regulation of signal transduction	138	0.0094	8	0.0116	0.121728	E	Tgif1,Lrp1,Rgs17,Chst11,P2rx7,Rgs10,Ngfr,Irak3
GO:0060348	4,6	bone development	138	0.0094	8	0.0116	0.121728	E	Igfbp5,Gnas,P2rx7,Enpp1,Wwox,Tuft1,Alox15,Wwtr1
GO:0022411	3	cellular component disassembly	70	0.0048	5	0.0072	0.121946	E	Scin,Cebpg,Map6d1,Nedd1,Irak3
GO:0046631	7,6	alpha-beta T cell activation	50	0.0034	4	0.0058	0.123145	E	Ap3d1,Atp7a,Dock2,Cd1d1
GO:0021543	6,8,4,9,10,5	pallium development	50	0.0034	4	0.0058	0.123145	E	Nde1,Tacc3,Pex13,Plxna3
GO:0008284	6,4,5	positive regulation of cell proliferation	231	0.0158	11	0.0159	0.123213	E	Tgif1,AY036118,Rtkn2,Fbxw4,Fgf17,Il11ra1,Pax3,Cdca7l,Ngfr,Il7,Cntfr
GO:0006954	5	inflammatory response	233	0.0159	11	0.0159	0.123278	E	Hdac9,Lipa,Cnr2,Ly96,Tlr3,Uaca,P2rx7,Myd88,Scn9a,Saal1,Cxcl10
GO:0050771	7,9,8,11,10,5,6,12,13,14	negative regulation of axonogenesis	15	0.001	2	0.0029	0.124316	E	Nrp1,Plxna3
GO:0009994	5,7,6	oocyte differentiation	15	0.001	2	0.0029	0.124316	E	Fbxo5,Cdc25b
GO:0000060	7,9,10,6,8	protein import into nucleus, translocation	15	0.001	2	0.0029	0.124316	E	Cep57,Arntl
GO:0030166	6,8,7	proteoglycan biosynthetic process	15	0.001	2	0.0029	0.124316	E	Man1c1,Chst11
GO:0045598	6,5	regulation of fat cell differentiation	15	0.001	2	0.0029	0.124316	E	Enpp1,Wwtr1
GO:0030516	8,9,11,10,7,13,12,14	regulation of axon extension	15	0.001	2	0.0029	0.124316	E	Nrp1,Plxna3
GO:0043648	6	dicarboxylic acid metabolic process	15	0.001	2	0.0029	0.124316	E	Aldh5a1,Got2
GO:0048599	6,7,8,5	oocyte development	15	0.001	2	0.0029	0.124316	E	Fbxo5,Cdc25b
GO:0009948	6,7,5	anterior/posterior axis specification	15	0.001	2	0.0029	0.124316	E	Frs2,Pcsk6
GO:0034104	6,4,5	negative regulation of tissue remodeling	15	0.001	2	0.0029	0.124316	E	P2rx7,Enpp1
GO:0043331	4	response to dsRNA	15	0.001	2	0.0029	0.124316	E	Tlr3,Irak3
GO:0031110	8,7,6	regulation of microtubule polymerization or depolymerization	15	0.001	2	0.0029	0.124316	E	Psrc1,Map6d1
GO:0042558	5	pteridine and derivative metabolic process	15	0.001	2	0.0029	0.124316	E	Mocs2,Folr1
GO:0001832	5,4,8,9	blastocyst growth	15	0.001	2	0.0029	0.124316	E	Ncapg2,Gins1
GO:0008203	6,7,8	cholesterol metabolic process	71	0.0048	5	0.0072	0.125025	E	Cyp39a1,Pctp,Abca2,Nsdhl,Soat1
GO:0030031	4	cell projection assembly	71	0.0048	5	0.0072	0.125025	E	Vav3,Tgfb3,P2rx7,Ift172,Dync2li1
GO:0046394	6	carboxylic acid biosynthetic process	93	0.0063	6	0.0087	0.125275	E	Cyp39a1,Prkag2,Ptgs1,Sc5d,Sc4mol,Alox15
GO:0016053	5	organic acid biosynthetic process	93	0.0063	6	0.0087	0.125275	E	Cyp39a1,Prkag2,Ptgs1,Sc5d,Sc4mol,Alox15
GO:0051049	5,4	regulation of transport	201	0.0137	10	0.0145	0.12722	E	Pkia,Nos1,Sgk1,Tacc3,Rufy1,Glud1,Uaca,P2rx7,Mfge8,Chrna3
GO:0002790	5,6	peptide secretion	51	0.0035	4	0.0058	0.12735	E	Glud1,Gpr119,Cplx1,Fam3b
GO:0031344	5,4	regulation of cell projection organization	51	0.0035	4	0.0058	0.12735	E	Nrp1,Tgfb3,Chrna3,Plxna3
GO:0003012	4	muscle system process	94	0.0064	6	0.0087	0.127532	E	Tbx20,P2rx3,Nos1,Chrna3,Cacna1g,Chrnb4
GO:0045582	10,8,9,7,6,11,12	positive regulation of T cell differentiation	32	0.0022	3	0.0043	0.12784	E	Ap3d1,Cd1d1,Il7
GO:0035137	7,6	hindlimb morphogenesis	32	0.0022	3	0.0043	0.12784	E	Gnas,Atp7a,Chd7
GO:0000398	9,11,8,10,7	nuclear mRNA splicing, via spliceosome	32	0.0022	3	0.0043	0.12784	E	Smn1,Gemin6,Sip1
GO:0000375	9,8,7	RNA splicing, via transesterification reactions	32	0.0022	3	0.0043	0.12784	E	Smn1,Gemin6,Sip1
GO:0000377	10,9,8	RNA splicing, via transesterification reactions with bulged adenosine as nucleophile	32	0.0022	3	0.0043	0.12784	E	Smn1,Gemin6,Sip1
GO:0006874	10,8	cellular calcium ion homeostasis	72	0.0049	5	0.0072	0.128046	E	P2rx7,Pik3cb,Vdr,Gpr12,Slc24a2
GO:0031112	8,9,7,6	positive regulation of microtubule polymerization or depolymerization	3	0.0002	1	0.0014	0.128247	E	Psrc1
GO:0051955	7,6,8	regulation of amino acid transport	3	0.0002	1	0.0014	0.128247	E	P2rx7
GO:0006177	12	GMP biosynthetic process	3	0.0002	1	0.0014	0.128247	E	Impdh2
GO:0010273	7,5	detoxification of copper ion	3	0.0002	1	0.0014	0.128247	E	Atp7a
GO:0031397	9,10,11,12,7,8	negative regulation of protein ubiquitination	3	0.0002	1	0.0014	0.128247	E	Gclc
GO:0006620	9,8,10	posttranslational protein targeting to membrane	3	0.0002	1	0.0014	0.128247	E	Folr1
GO:0060292	9,10,7,8	long term synaptic depression	3	0.0002	1	0.0014	0.128247	E	Slc24a2
GO:0043032	8,7,6,5	positive regulation of macrophage activation	3	0.0002	1	0.0014	0.128247	E	H60a
GO:0051340	5	regulation of ligase activity	3	0.0002	1	0.0014	0.128247	E	Fbxo5
GO:0007016	7,5,6	cytoskeletal anchoring at plasma membrane	3	0.0002	1	0.0014	0.128247	E	Tln1
GO:0006670	5,8,6,9	sphingosine metabolic process	3	0.0002	1	0.0014	0.128247	E	Ppap2a
GO:0046477	8,10,9,11	glycosylceramide catabolic process	3	0.0002	1	0.0014	0.128247	E	Gba2
GO:0042180	4	cellular ketone metabolic process	3	0.0002	1	0.0014	0.128247	E	Got2
GO:0045404	9,8,7,6	positive regulation of interleukin-4 biosynthetic process	3	0.0002	1	0.0014	0.128247	E	Cd1d1
GO:0031579	4	membrane raft organization	3	0.0002	1	0.0014	0.128247	E	Dock2
GO:0000394	9,8,7	RNA splicing, via endonucleolytic cleavage and ligation	3	0.0002	1	0.0014	0.128247	E	Trpt1
GO:0050703	9,7,8,10,6	interleukin-1 alpha secretion	3	0.0002	1	0.0014	0.128247	E	P2rx7
GO:0006527	8,9	arginine catabolic process	3	0.0002	1	0.0014	0.128247	E	Ddah2
GO:0001919	7,8,6	regulation of receptor recycling	3	0.0002	1	0.0014	0.128247	E	Ache
GO:0048636	6,7,8,4,5	positive regulation of muscle development	3	0.0002	1	0.0014	0.128247	E	Gja1
GO:0046685	5	response to arsenic	3	0.0002	1	0.0014	0.128247	E	Gclc
GO:0010216	9,8,10,11,7,6	maintenance of DNA methylation	3	0.0002	1	0.0014	0.128247	E	Ctcf
GO:0006266	7,6	DNA ligation	3	0.0002	1	0.0014	0.128247	E	Aptx
GO:0045143	10,8,7,5,9,6,4	homologous chromosome segregation	3	0.0002	1	0.0014	0.128247	E	Espl1
GO:0032890	6,5	regulation of organic acid transport	3	0.0002	1	0.0014	0.128247	E	P2rx7
GO:0006681	8,10,9,11	galactosylceramide metabolic process	3	0.0002	1	0.0014	0.128247	E	Aldh5a1
GO:0051983	5,4	regulation of chromosome segregation	3	0.0002	1	0.0014	0.128247	E	Cenpe
GO:0050717	9,10,12,11,7,8	positive regulation of interleukin-1 alpha secretion	3	0.0002	1	0.0014	0.128247	E	P2rx7
GO:0032768	6	regulation of monooxygenase activity	3	0.0002	1	0.0014	0.128247	E	Vdr
GO:0045116	9,10,8	protein neddylation	3	0.0002	1	0.0014	0.128247	E	Ube2f
GO:0055117	7,8,6	regulation of cardiac muscle contraction	3	0.0002	1	0.0014	0.128247	E	Cacna1g
GO:0045402	8,7,6	regulation of interleukin-4 biosynthetic process	3	0.0002	1	0.0014	0.128247	E	Cd1d1
GO:0048840	5,8,4,9	otolith development	3	0.0002	1	0.0014	0.128247	E	Muted
GO:0006388	10,9,8	tRNA splicing, via endonucleolytic cleavage and ligation	3	0.0002	1	0.0014	0.128247	E	Trpt1
GO:0006106	7	fumarate metabolic process	3	0.0002	1	0.0014	0.128247	E	Got2
GO:0006891	7,5,6	intra-Golgi vesicle-mediated transport	3	0.0002	1	0.0014	0.128247	E	Gabarapl2
GO:0015809	7,8,9	arginine transport	3	0.0002	1	0.0014	0.128247	E	Slc7a3
GO:0031116	9,10,8,7,6	positive regulation of microtubule polymerization	3	0.0002	1	0.0014	0.128247	E	Psrc1
GO:0046688	6	response to copper ion	3	0.0002	1	0.0014	0.128247	E	Atp7a
GO:0042097	7,5	interleukin-4 biosynthetic process	3	0.0002	1	0.0014	0.128247	E	Cd1d1
GO:0010043	6	response to zinc ion	3	0.0002	1	0.0014	0.128247	E	P2rx7
GO:0002238	5,4,6	response to molecule of fungal origin	3	0.0002	1	0.0014	0.128247	E	Myd88
GO:0000212	7,8,5,4,6	meiotic spindle organization	3	0.0002	1	0.0014	0.128247	E	Espl1
GO:0045907	6,7,8,4,5,9	positive regulation of vasoconstriction	3	0.0002	1	0.0014	0.128247	E	Dbh
GO:0060009	5,6,8,9,10	Sertoli cell development	3	0.0002	1	0.0014	0.128247	E	Hsd17b4
GO:0044030	8,7,9,10,6	regulation of DNA methylation	3	0.0002	1	0.0014	0.128247	E	Ctcf
GO:0006107	7	oxaloacetate metabolic process	3	0.0002	1	0.0014	0.128247	E	Got2
GO:0019374	7,8	galactolipid metabolic process	3	0.0002	1	0.0014	0.128247	E	Aldh5a1
GO:0048251	4,5	elastic fiber assembly	3	0.0002	1	0.0014	0.128247	E	Atp7a
GO:0030206	8,7,10,9	chondroitin sulfate biosynthetic process	3	0.0002	1	0.0014	0.128247	E	Chst11
GO:0016558	6,9,8,7,10	protein import into peroxisome matrix	3	0.0002	1	0.0014	0.128247	E	Pex13
GO:0051926	7,8,9,6,10,5	negative regulation of calcium ion transport	3	0.0002	1	0.0014	0.128247	E	Nos1
GO:0019852	6	L-ascorbic acid metabolic process	3	0.0002	1	0.0014	0.128247	E	Gclc
GO:0008617	9	guanosine metabolic process	3	0.0002	1	0.0014	0.128247	E	Qtrtd1
GO:0006531	7,8	aspartate metabolic process	3	0.0002	1	0.0014	0.128247	E	Got2
GO:0045844	7,8,9,10,5,6	positive regulation of striated muscle development	3	0.0002	1	0.0014	0.128247	E	Gja1
GO:0006103	5,7	2-oxoglutarate metabolic process	3	0.0002	1	0.0014	0.128247	E	Got2
GO:0006828	8,9	manganese ion transport	3	0.0002	1	0.0014	0.128247	E	Trpc7
GO:0050705	9,11,10,8,7	regulation of interleukin-1 alpha secretion	3	0.0002	1	0.0014	0.128247	E	P2rx7
GO:0043267	7,8,9,6,10,5	negative regulation of potassium ion transport	3	0.0002	1	0.0014	0.128247	E	Nos1
GO:0007210	8,7	serotonin receptor signaling pathway	3	0.0002	1	0.0014	0.128247	E	Htr3b
GO:0050435	6	beta-amyloid metabolic process	3	0.0002	1	0.0014	0.128247	E	Unc13a
GO:0030540	6,7,8	female genitalia development	3	0.0002	1	0.0014	0.128247	E	Chd7
GO:0045739	9,8,6,7,4,5	positive regulation of DNA repair	3	0.0002	1	0.0014	0.128247	E	Cebpg
GO:0003002	5,4	regionalization	212	0.0145	10	0.0145	0.129103	E	Tgif1,Tbx20,Bmpr2,Btg2,Lfng,Ift172,Frs2,Arl13b,Mllt3,Pcsk6
GO:0007178	8,7	transmembrane receptor protein serine/threonine kinase signaling pathway	95	0.0065	6	0.0087	0.129737	E	Bmpr2,Map3k1,Chst11,Myd88,Wfikkn2,Ltbp3
GO:0043408	8,9,7	regulation of MAPKKK cascade	73	0.005	5	0.0072	0.131006	E	Map3k1,Tlr3,P2rx7,Myd88,Traf7
GO:0002252	3,4	immune effector process	175	0.0119	9	0.013	0.131288	E	Dbh,Cplx2,Swap70,Abcc9,P2rx7,Myd88,Cebpg,H60a,Cd1d1
GO:0043241	5	protein complex disassembly	52	0.0035	4	0.0058	0.131484	E	Scin,Map6d1,Nedd1,Irak3
GO:0001824	4,7,8	blastocyst development	52	0.0035	4	0.0058	0.131484	E	Ncapg2,Rbbp8,Srf,Gins1
GO:0001525	4,6,7,8,9,5	angiogenesis	148	0.0101	8	0.0116	0.133548	E	Tbx20,Rhob,Angpt2,Casp8,Nrp1,Plxnd1,Pknox1,Adra2b
GO:0021954	9,6,10,7,8	central nervous system neuron development	33	0.0023	3	0.0043	0.13402	E	Dclk1,Atp7a,Plxna3
GO:0045087	4,5	innate immune response	122	0.0083	7	0.0101	0.134543	E	Il1rap,Tlr3,Myd88,Cebpg,H60a,Cd1d1,Irak3
GO:0030003	8,6	cellular cation homeostasis	122	0.0083	7	0.0101	0.134543	E	Ttc7,P2rx7,Pik3cb,Atp7a,Vdr,Gpr12,Slc24a2
GO:0051056	7,8,6	regulation of small GTPase mediated signal transduction	183	0.0125	9	0.013	0.134776	E	Farp2,Vav3,Wdr67,E130306D19Rik,Garnl3,Dock2,Rasa3,Tbc1d9,Arhgef18
GO:0010332	6	response to gamma radiation	16	0.0011	2	0.0029	0.135401	E	Xrcc2,Chek2
GO:0045453	7,5	bone resorption	16	0.0011	2	0.0029	0.135401	E	P2rx7,Il7
GO:0000910	4	cytokinesis	16	0.0011	2	0.0029	0.135401	E	Prc1,Anln
GO:0032755	7,5,6	positive regulation of interleukin-6 production	16	0.0011	2	0.0029	0.135401	E	Tlr3,P2rx7
GO:0021872	7,8,5,9	generation of neurons in the forebrain	16	0.0011	2	0.0029	0.135401	E	Atp7a,Plxna3
GO:0043123	9,10,8,7	positive regulation of I-kappaB kinase/NF-kappaB cascade	16	0.0011	2	0.0029	0.135401	E	Tlr3,Myd88
GO:0042094	7,5	interleukin-2 biosynthetic process	16	0.0011	2	0.0029	0.135401	E	Il1rap,Cd1d1
GO:0044419	3	interspecies interaction between organisms	16	0.0011	2	0.0029	0.135401	E	Mst1r,Ceacam1
GO:0019098	4,3	reproductive behavior	16	0.0011	2	0.0029	0.135401	E	Dbh,Th
GO:0003016	4	respiratory system process	16	0.0011	2	0.0029	0.135401	E	Adh5,Nlgn2
GO:0035050	6,7,5,4	embryonic heart tube development	16	0.0011	2	0.0029	0.135401	E	Tbx20,Gja1
GO:0034623	5,4	cellular macromolecular complex disassembly	53	0.0036	4	0.0058	0.135538	E	Scin,Cebpg,Map6d1,Nedd1
GO:0022404	4	molting cycle process	53	0.0036	4	0.0058	0.135538	E	Atp7a,Ngfr,Nsdhl,Acvr1b
GO:0001942	8,7,9,6	hair follicle development	53	0.0036	4	0.0058	0.135538	E	Atp7a,Ngfr,Nsdhl,Acvr1b
GO:0022405	5	hair cycle process	53	0.0036	4	0.0058	0.135538	E	Atp7a,Ngfr,Nsdhl,Acvr1b
GO:0055066	8	di-, tri-valent inorganic cation homeostasis	123	0.0084	7	0.0101	0.135959	E	Ttc7,P2rx7,Pik3cb,Atp7a,Vdr,Gpr12,Slc24a2
GO:0007229	7,6	integrin-mediated signaling pathway	75	0.0051	5	0.0072	0.136727	E	Vav3,Adam15,Adam19,Itga2,Itga1
GO:0009967	7,6,5	positive regulation of signal transduction	124	0.0085	7	0.0101	0.137323	E	Tmod2,Tlr3,Ncam1,P2rx7,Myd88,Dock2,Traf7
GO:0055074	9	calcium ion homeostasis	76	0.0052	5	0.0072	0.139482	E	P2rx7,Pik3cb,Vdr,Gpr12,Slc24a2
GO:0042158	6	lipoprotein biosynthetic process	54	0.0037	4	0.0058	0.139506	E	Hhat,Map6d1,Atg10,Pigl
GO:0080135	5,6,4	regulation of cellular response to stress	54	0.0037	4	0.0058	0.139506	E	Map3k1,Tlr3,Myd88,Cebpg
GO:0007612	7,5	learning	54	0.0037	4	0.0058	0.139506	E	Accn2,Dbh,Th,Slc24a2
GO:0030217	7,9,10,8,6	T cell differentiation	100	0.0068	6	0.0087	0.139899	E	Ap3d1,Atp7a,Dock2,Pknox1,Cd1d1,Il7
GO:0045621	9,7,8,6,5,10,11	positive regulation of lymphocyte differentiation	34	0.0023	3	0.0043	0.140085	E	Ap3d1,Cd1d1,Il7
GO:0006937	6,5	regulation of muscle contraction	34	0.0023	3	0.0043	0.140085	E	Chrna3,Cacna1g,Chrnb4
GO:0016126	6,7,8	sterol biosynthetic process	34	0.0023	3	0.0043	0.140085	E	Sc5d,Sc4mol,Nsdhl
GO:0001654	6,7	eye development	157	0.0107	8	0.0116	0.140411	E	Tgif1,Map3k1,Th,Ache,Chd7,Mitf,Frs2,Pknox1
GO:0030099	5,7,8,6	myeloid cell differentiation	127	0.0087	7	0.0101	0.141093	E	Casp8,Mfsd7b,Gnas,Cebpg,Mitf,Pknox1,Plscr1
GO:0019318	6,7	hexose metabolic process	129	0.0088	7	0.0101	0.143332	E	Man1c1,Aldh5a1,Fuca2,Dhtkd1,Renbp,Uevld,Gmds
GO:0051186	4	cofactor metabolic process	166	0.0113	8	0.0116	0.143572	E	Aldh5a1,Mocs2,Scp2,Gclc,Acss2,Gstk1,Tpk1,Folr1
GO:0051258	7,6	protein polymerization	78	0.0053	5	0.0072	0.144763	E	Scin,Psrc1,Map3k1,Fbxo5,Tube1
GO:0051493	6,5	regulation of cytoskeleton organization	78	0.0053	5	0.0072	0.144763	E	Scin,Psrc1,Cenpe,Map3k1,Map6d1
GO:0007005	4	mitochondrion organization	78	0.0053	5	0.0072	0.144763	E	Map3k1,Mtx2,P2rx7,Atp7a,Tfam
GO:0046632	8,10,11,9,7	alpha-beta T cell differentiation	35	0.0024	3	0.0043	0.14602	E	Ap3d1,Atp7a,Cd1d1
GO:0007585	3	respiratory gaseous exchange	35	0.0024	3	0.0043	0.14602	E	Adh5,Chst11,Nlgn2
GO:0006939	6	smooth muscle contraction	35	0.0024	3	0.0043	0.14602	E	P2rx3,Chrna3,Chrnb4
GO:0045088	6,7,5	regulation of innate immune response	35	0.0024	3	0.0043	0.14602	E	Myd88,H60a,Irak3
GO:0048145	6,5	regulation of fibroblast proliferation	17	0.0012	2	0.0029	0.146244	E	Tgif1,Ngfr
GO:0048144	4	fibroblast proliferation	17	0.0012	2	0.0029	0.146244	E	Tgif1,Ngfr
GO:0045670	8,7,10,11,9,6	regulation of osteoclast differentiation	17	0.0012	2	0.0029	0.146244	E	Gnas,Mitf
GO:0007091	7,9,5,8,6,4	mitotic metaphase/anaphase transition	17	0.0012	2	0.0029	0.146244	E	Cenpe,Bub1b
GO:0051092	10,8,11,9	positive regulation of NF-kappaB transcription factor activity	17	0.0012	2	0.0029	0.146244	E	Tlr3,Myd88
GO:0006284	8,7	base-excision repair	17	0.0012	2	0.0029	0.146244	E	Rad51l3,Neil3
GO:0016601	9,8	Rac protein signal transduction	17	0.0012	2	0.0029	0.146244	E	Farp2,Dock2
GO:0044243	4	multicellular organismal catabolic process	17	0.0012	2	0.0029	0.146244	E	P2rx7,Mmp9
GO:0006814	7,8	sodium ion transport	132	0.009	7	0.0101	0.146272	E	Nos1,Sgk1,Accn2,Hcn2,Atp1b1,Scn1a,Scn9a
GO:0005996	5,6	monosaccharide metabolic process	133	0.0091	7	0.0101	0.147139	E	Man1c1,Aldh5a1,Fuca2,Dhtkd1,Renbp,Uevld,Gmds
GO:0034103	5,4	regulation of tissue remodeling	56	0.0038	4	0.0058	0.147157	E	Gnas,P2rx7,Vdr,Enpp1
GO:0042303	3	molting cycle	56	0.0038	4	0.0058	0.147157	E	Atp7a,Ngfr,Nsdhl,Acvr1b
GO:0016567	9,10,8	protein ubiquitination	56	0.0038	4	0.0058	0.147157	E	Gclc,Nsmce2,Ube4a,Uhrf2
GO:0042633	4	hair cycle	56	0.0038	4	0.0058	0.147157	E	Atp7a,Ngfr,Nsdhl,Acvr1b
GO:0051129	5,3,4	negative regulation of cellular component organization	79	0.0054	5	0.0072	0.147284	E	Scin,Nrp1,Cenpe,Map6d1,Plxna3
GO:0051130	5,3,4	positive regulation of cellular component organization	79	0.0054	5	0.0072	0.147284	E	Psrc1,Cenpe,Map3k1,Tgfb3,Mfge8
GO:0035264	3	multicellular organism growth	105	0.0072	6	0.0087	0.148478	E	Mfsd7b,Plekha1,Etnk2,Stil,Tshr,Chd7
GO:0060284	6,5	regulation of cell development	135	0.0092	7	0.0101	0.148703	E	Tgif1,Xrcc2,Nrp1,Vdr,Chrna3,Plxna3,Lbx1
GO:0006875	9,7	cellular metal ion homeostasis	80	0.0055	5	0.0072	0.149722	E	P2rx7,Pik3cb,Vdr,Gpr12,Slc24a2
GO:0016051	4,5	carbohydrate biosynthetic process	80	0.0055	5	0.0072	0.149722	E	Man1c1,B3galnt1,Chst11,B3galt2,Phkg2
GO:0009100	5	glycoprotein metabolic process	106	0.0072	6	0.0087	0.149989	E	Unc13a,B3galnt1,Fut10,Atp7a,Edem3,B3galt2
GO:0031401	8,9,6,7	positive regulation of protein modification process	57	0.0039	4	0.0058	0.150829	E	Bmpr2,P2rx7,Atg10,Rb1cc1
GO:0007601	8	visual perception	107	0.0073	6	0.0087	0.151431	E	Cln5,Th,Cacna2d4,Opn3,Cnga3,Spata7
GO:0021987	4,7,9,5,10,11,6	cerebral cortex development	36	0.0025	3	0.0043	0.151812	E	Nde1,Tacc3,Pex13
GO:0048066	3	pigmentation during development	36	0.0025	3	0.0043	0.151812	E	Pax3,Mitf,Muted
GO:0007190	12,13,8,11,14	activation of adenylate cyclase activity	36	0.0025	3	0.0043	0.151812	E	Gnas,Tshr,Adcy6
GO:0050953	7	sensory perception of light stimulus	108	0.0074	6	0.0087	0.152803	E	Cln5,Th,Cacna2d4,Opn3,Cnga3,Spata7
GO:0080134	5,4	regulation of response to stress	144	0.0098	7	0.0101	0.152953	E	Map3k1,Tlr3,Uaca,Myd88,Cebpg,H60a,Irak3
GO:0006644	5,6	phospholipid metabolic process	144	0.0098	7	0.0101	0.152953	E	Aldh5a1,Pip4k2a,Etnk2,Chka,Pik3cb,Pigl,Chpt1
GO:0051726	5,4	regulation of cell cycle	145	0.0099	7	0.0101	0.153149	E	Pkia,Cenpe,Chek1,Tacc3,Fbxo5,Ccnd3,Nbn
GO:0010740	8,9,7,6	positive regulation of protein kinase cascade	58	0.004	4	0.0058	0.154391	E	Tlr3,P2rx7,Myd88,Traf7
GO:0007498	6,7,5	mesoderm development	58	0.004	4	0.0058	0.154391	E	Txnrd1,Bmpr2,Mesdc2,Acvr1b
GO:0043414	6	biopolymer methylation	58	0.004	4	0.0058	0.154391	E	Btg2,Eed,Ctcf,Suv39h2
GO:0006809	6,5	nitric oxide biosynthetic process	18	0.0012	2	0.0029	0.156794	E	Nos1,H60a
GO:0008306	8,6	associative learning	18	0.0012	2	0.0029	0.156794	E	Accn2,Dbh
GO:0002709	8,9,7	regulation of T cell mediated immunity	18	0.0012	2	0.0029	0.156794	E	P2rx7,Cd1d1
GO:0034329	4	cell junction assembly	18	0.0012	2	0.0029	0.156794	E	Dlc1,Tln1
GO:0006541	7,8	glutamine metabolic process	18	0.0012	2	0.0029	0.156794	E	Aldh5a1,Ctps
GO:0031345	6,4,5	negative regulation of cell projection organization	18	0.0012	2	0.0029	0.156794	E	Nrp1,Plxna3
GO:0060674	6,7,8	placenta blood vessel development	18	0.0012	2	0.0029	0.156794	E	Esx1,Nsdhl
GO:0006221	9	pyrimidine nucleotide biosynthetic process	18	0.0012	2	0.0029	0.156794	E	Ctps,Nme4
GO:0000077	8,7	DNA damage checkpoint	18	0.0012	2	0.0029	0.156794	E	Chek1,Nbn
GO:0015807	6,7,8	L-amino acid transport	18	0.0012	2	0.0029	0.156794	E	P2rx7,Slc43a1
GO:0046209	4	nitric oxide metabolic process	18	0.0012	2	0.0029	0.156794	E	Nos1,H60a
GO:0030148	6,7,8	sphingolipid biosynthetic process	18	0.0012	2	0.0029	0.156794	E	P2rx7,B4galt6
GO:0007031	4	peroxisome organization	18	0.0012	2	0.0029	0.156794	E	Scp2,Pex13
GO:0001974	7,8,9,6,4	blood vessel remodeling	18	0.0012	2	0.0029	0.156794	E	Dbh,Atp7a
GO:0051640	4	organelle localization	37	0.0025	3	0.0043	0.157445	E	Slit1,Tacc3,Pex13
GO:0045762	11,12,7,10,13	positive regulation of adenylate cyclase activity	37	0.0025	3	0.0043	0.157445	E	Gnas,Tshr,Adcy6
GO:0051261	7,6	protein depolymerization	37	0.0025	3	0.0043	0.157445	E	Scin,Map6d1,Nedd1
GO:0031281	10,11,6,9,12	positive regulation of cyclase activity	37	0.0025	3	0.0043	0.157445	E	Gnas,Tshr,Adcy6
GO:0051349	6	positive regulation of lyase activity	37	0.0025	3	0.0043	0.157445	E	Gnas,Tshr,Adcy6
GO:0009953	6,5	dorsal/ventral pattern formation	59	0.004	4	0.0058	0.157838	E	Tgif1,Tbx20,Ift172,Arl13b
GO:0035108	6,5	limb morphogenesis	113	0.0077	6	0.0087	0.158582	E	Mfsd7b,Fbxw4,Gnas,Chst11,Atp7a,Chd7
GO:0035107	5,4	appendage morphogenesis	113	0.0077	6	0.0087	0.158582	E	Mfsd7b,Fbxw4,Gnas,Chst11,Atp7a,Chd7
GO:0050767	7,6,8,5	regulation of neurogenesis	114	0.0078	6	0.0087	0.159521	E	Tgif1,Xrcc2,Nrp1,Chrna3,Plxna3,Lbx1
GO:0060249	5	anatomical structure homeostasis	114	0.0078	6	0.0087	0.159521	E	Lipa,Tinf2,Srf,P2rx7,Terf1,Il7
GO:0051241	5,3,4	negative regulation of multicellular organismal process	85	0.0058	5	0.0072	0.160593	E	P2rx7,Ngfr,Enpp1,Slc24a2,Irak3
GO:0046879	6,4,5,7	hormone secretion	60	0.0041	4	0.0058	0.161166	E	Glud1,Gpr119,Cplx1,Fam3b
GO:0060173	5	limb development	117	0.008	6	0.0087	0.161903	E	Mfsd7b,Fbxw4,Gnas,Chst11,Atp7a,Chd7
GO:0048736	4	appendage development	117	0.008	6	0.0087	0.161903	E	Mfsd7b,Fbxw4,Gnas,Chst11,Atp7a,Chd7
GO:0006633	7,6,8,5	fatty acid biosynthetic process	86	0.0059	5	0.0072	0.162492	E	Prkag2,Ptgs1,Sc5d,Sc4mol,Alox15
GO:0051050	5,6,4,3	positive regulation of transport	86	0.0059	5	0.0072	0.162492	E	Sgk1,Glud1,Uaca,P2rx7,Mfge8
GO:0055065	8	metal ion homeostasis	86	0.0059	5	0.0072	0.162492	E	P2rx7,Pik3cb,Vdr,Gpr12,Slc24a2
GO:0043244	5,6,4	regulation of protein complex disassembly	38	0.0026	3	0.0043	0.162909	E	Scin,Map6d1,Irak3
GO:0051090	8,6,9,7	regulation of transcription factor activity	38	0.0026	3	0.0043	0.162909	E	Tlr3,Myd88,Cebpg
GO:0045332	4,6,7	phospholipid translocation	4	0.0003	1	0.0014	0.162957	E	P2rx7
GO:0046129	9	purine ribonucleoside biosynthetic process	4	0.0003	1	0.0014	0.162957	E	Qtrtd1
GO:0070169	6,7,8,9,4,5	positive regulation of biomineral formation	4	0.0003	1	0.0014	0.162957	E	P2rx7
GO:0000012	8,7	single strand break repair	4	0.0003	1	0.0014	0.162957	E	Aptx
GO:0060561	6,7,5,4	apoptosis involved in morphogenesis	4	0.0003	1	0.0014	0.162957	E	Vdr
GO:0046037	11	GMP metabolic process	4	0.0003	1	0.0014	0.162957	E	Impdh2
GO:0042455	8	ribonucleoside biosynthetic process	4	0.0003	1	0.0014	0.162957	E	Qtrtd1
GO:0009203	7,10	ribonucleoside triphosphate catabolic process	4	0.0003	1	0.0014	0.162957	E	Entpd7
GO:0043277	7,6,8	apoptotic cell clearance	4	0.0003	1	0.0014	0.162957	E	Lrp1
GO:0042271	8,12,13,9,11,10,6,7	susceptibility to natural killer cell mediated cytotoxicity	4	0.0003	1	0.0014	0.162957	E	H60a
GO:0016322	7,10,8,11,6	neuron remodeling	4	0.0003	1	0.0014	0.162957	E	Farp2
GO:0045779	6,8,9,7,4,5	negative regulation of bone resorption	4	0.0003	1	0.0014	0.162957	E	P2rx7
GO:0050706	9,11,10,8,7	regulation of interleukin-1 beta secretion	4	0.0003	1	0.0014	0.162957	E	P2rx7
GO:0032695	7,5,6	negative regulation of interleukin-12 production	4	0.0003	1	0.0014	0.162957	E	Irak3
GO:0060746	6,5	parental behavior	4	0.0003	1	0.0014	0.162957	E	Dbh
GO:0006498	8,11,9,10	N-terminal protein lipidation	4	0.0003	1	0.0014	0.162957	E	Map6d1
GO:0050718	9,10,12,11,7,8	positive regulation of interleukin-1 beta secretion	4	0.0003	1	0.0014	0.162957	E	P2rx7
GO:0050704	8,10,9,7,6	regulation of interleukin-1 secretion	4	0.0003	1	0.0014	0.162957	E	P2rx7
GO:0006282	8,6,7,5	regulation of DNA repair	4	0.0003	1	0.0014	0.162957	E	Cebpg
GO:0045672	9,8,7,10,11,12	positive regulation of osteoclast differentiation	4	0.0003	1	0.0014	0.162957	E	Gnas
GO:0031623	7,5,6,8	receptor internalization	4	0.0003	1	0.0014	0.162957	E	Ache
GO:0007020	6,5	microtubule nucleation	4	0.0003	1	0.0014	0.162957	E	Nde1
GO:0006598	8,7	polyamine catabolic process	4	0.0003	1	0.0014	0.162957	E	Sat1
GO:0060008	5,7,8,9	Sertoli cell differentiation	4	0.0003	1	0.0014	0.162957	E	Hsd17b4
GO:0032436	8,9,10,12,13,11,6,7	positive regulation of proteasomal ubiquitin-dependent protein catabolic process	4	0.0003	1	0.0014	0.162957	E	Gclc
GO:0007386	7,6	compartment specification	4	0.0003	1	0.0014	0.162957	E	Lfng
GO:0032715	7,5,6	negative regulation of interleukin-6 production	4	0.0003	1	0.0014	0.162957	E	Irak3
GO:0051567	11,10,12,13	histone H3-K9 methylation	4	0.0003	1	0.0014	0.162957	E	Suv39h2
GO:0032835	4,6,7	glomerulus development	4	0.0003	1	0.0014	0.162957	E	Wwtr1
GO:0001823	6,7	mesonephros development	4	0.0003	1	0.0014	0.162957	E	Gata3
GO:0042420	8,9	dopamine catabolic process	4	0.0003	1	0.0014	0.162957	E	Dbh
GO:0006067	6	ethanol metabolic process	4	0.0003	1	0.0014	0.162957	E	Adh5
GO:0035188	3,4	hatching	4	0.0003	1	0.0014	0.162957	E	Rbbp8
GO:0030953	7,8,6	spindle astral microtubule organization	4	0.0003	1	0.0014	0.162957	E	Tacc3
GO:0001778	5,6	plasma membrane repair	4	0.0003	1	0.0014	0.162957	E	Syt7
GO:0042348	10,11,9,8	NF-kappaB import into nucleus	4	0.0003	1	0.0014	0.162957	E	Uaca
GO:0016973	11,10,7,9,8	poly(A)+ mRNA export from nucleus	4	0.0003	1	0.0014	0.162957	E	Gle1
GO:0050716	8,9,11,10,6,7	positive regulation of interleukin-1 secretion	4	0.0003	1	0.0014	0.162957	E	P2rx7
GO:0009448	6,8,10,9	gamma-aminobutyric acid metabolic process	4	0.0003	1	0.0014	0.162957	E	Aldh5a1
GO:0015802	6,7,8	basic amino acid transport	4	0.0003	1	0.0014	0.162957	E	Slc7a3
GO:0006707	7,8,9	cholesterol catabolic process	4	0.0003	1	0.0014	0.162957	E	Cyp39a1
GO:0030501	7,9,8,10,5,6	positive regulation of bone mineralization	4	0.0003	1	0.0014	0.162957	E	P2rx7
GO:0034308	5	monohydric alcohol metabolic process	4	0.0003	1	0.0014	0.162957	E	Adh5
GO:0050702	9,7,8,10,6	interleukin-1 beta secretion	4	0.0003	1	0.0014	0.162957	E	P2rx7
GO:0009163	7	nucleoside biosynthetic process	4	0.0003	1	0.0014	0.162957	E	Qtrtd1
GO:0046219	8,7,6	indolalkylamine biosynthetic process	4	0.0003	1	0.0014	0.162957	E	Tph1
GO:0032753	7,5,6	positive regulation of interleukin-4 production	4	0.0003	1	0.0014	0.162957	E	Gata3
GO:0042711	7,6	maternal behavior	4	0.0003	1	0.0014	0.162957	E	Dbh
GO:0034204	5,6	lipid translocation	4	0.0003	1	0.0014	0.162957	E	P2rx7
GO:0043489	9,8,7	RNA stabilization	4	0.0003	1	0.0014	0.162957	E	Mapkapk2
GO:0042447	6,4	hormone catabolic process	4	0.0003	1	0.0014	0.162957	E	Ace
GO:0042435	7,5	indole derivative biosynthetic process	4	0.0003	1	0.0014	0.162957	E	Tph1
GO:0001960	8,9,7,6	negative regulation of cytokine-mediated signaling pathway	4	0.0003	1	0.0014	0.162957	E	Irak3
GO:0022027	5,6,8,9,10	interkinetic nuclear migration	4	0.0003	1	0.0014	0.162957	E	Tacc3
GO:0060058	9,7,6,8,10,11,5	positive regulation of apoptosis involved in mammary gland involution	4	0.0003	1	0.0014	0.162957	E	Vdr
GO:0015780	5,6	nucleotide-sugar transport	4	0.0003	1	0.0014	0.162957	E	Slc35a2
GO:0048255	10,9,8	mRNA stabilization	4	0.0003	1	0.0014	0.162957	E	Mapkapk2
GO:0015879	6,5,8,7,9	carnitine transport	4	0.0003	1	0.0014	0.162957	E	Slc22a21
GO:0009186	9	deoxyribonucleoside diphosphate metabolic process	4	0.0003	1	0.0014	0.162957	E	Rrm2
GO:0042345	10,11,12,9	regulation of NF-kappaB import into nucleus	4	0.0003	1	0.0014	0.162957	E	Uaca
GO:0050832	5,6	defense response to fungus	4	0.0003	1	0.0014	0.162957	E	Cotl1
GO:0050919	5,7,6	negative chemotaxis	4	0.0003	1	0.0014	0.162957	E	Plxna3
GO:0006900	4,5,6	membrane budding	4	0.0003	1	0.0014	0.162957	E	P2rx7
GO:0006651	7,8,9	diacylglycerol biosynthetic process	4	0.0003	1	0.0014	0.162957	E	Ppap2a
GO:0019605	7,9,8	butyrate metabolic process	4	0.0003	1	0.0014	0.162957	E	Aldh5a1
GO:0060057	7,8,6,9,10,5	apoptosis involved in mammary gland involution	4	0.0003	1	0.0014	0.162957	E	Vdr
GO:0006269	9,6,7,8	DNA replication, synthesis of RNA primer	4	0.0003	1	0.0014	0.162957	E	Prim1
GO:0031113	9,8,7,6	regulation of microtubule polymerization	4	0.0003	1	0.0014	0.162957	E	Psrc1
GO:0001835	5,8,4,9	blastocyst hatching	4	0.0003	1	0.0014	0.162957	E	Rbbp8
GO:0016127	6,7,8	sterol catabolic process	4	0.0003	1	0.0014	0.162957	E	Cyp39a1
GO:0042451	8	purine nucleoside biosynthetic process	4	0.0003	1	0.0014	0.162957	E	Qtrtd1
GO:0048872	5	homeostasis of number of cells	121	0.0083	6	0.0087	0.164077	E	Lipa,Mfsd7b,P2rx7,Cebpg,Pknox1,Il7
GO:0043473	2	pigmentation	61	0.0042	4	0.0058	0.164371	E	Pax3,Atp7a,Mitf,Muted
GO:0009108	6	coenzyme biosynthetic process	61	0.0042	4	0.0058	0.164371	E	Mocs2,Gclc,Acss2,Tpk1
GO:0009914	5,4	hormone transport	61	0.0042	4	0.0058	0.164371	E	Glud1,Gpr119,Cplx1,Fam3b
GO:0006333	6	chromatin assembly or disassembly	123	0.0084	6	0.0087	0.164743	E	H2afv,Suv39h2,Hist1h2ab,Chd7,Cebpg,Cenpa
GO:0010608	7,6	posttranscriptional regulation of gene expression	124	0.0085	6	0.0087	0.164974	E	Eif2c4,Ppp1r15a,Pstk,Paip2b,Ngdn,Mapkapk2
GO:0002449	5,6	lymphocyte mediated immunity	124	0.0085	6	0.0087	0.164974	E	Swap70,P2rx7,Myd88,Cebpg,H60a,Cd1d1
GO:0006417	7,8,6	regulation of translation	88	0.006	5	0.0072	0.166006	E	Eif2c4,Ppp1r15a,Pstk,Paip2b,Ngdn
GO:0051222	6,8,7,5,4	positive regulation of protein transport	19	0.0013	2	0.0029	0.167005	E	Uaca,P2rx7
GO:0009066	6,7	aspartate family amino acid metabolic process	19	0.0013	2	0.0029	0.167005	E	Got2,Mri1
GO:0043407	12,9,11	negative regulation of MAP kinase activity	19	0.0013	2	0.0029	0.167005	E	Dusp19,Irak3
GO:0048701	7,8,9,6	embryonic cranial skeleton morphogenesis	19	0.0013	2	0.0029	0.167005	E	Gnas,Chst11
GO:0035116	8,7	embryonic hindlimb morphogenesis	19	0.0013	2	0.0029	0.167005	E	Gnas,Chd7
GO:0008630	11,8,7,9,10	DNA damage response, signal transduction resulting in induction of apoptosis	19	0.0013	2	0.0029	0.167005	E	Xpa,Uaca
GO:0003014	4	renal system process	19	0.0013	2	0.0029	0.167005	E	Chrna3,Chrnb4
GO:0045058	8,10,11,9,7,3	T cell selection	19	0.0013	2	0.0029	0.167005	E	Dock2,Cd1d1
GO:0046638	11,9,10,8,7,12,13	positive regulation of alpha-beta T cell differentiation	19	0.0013	2	0.0029	0.167005	E	Ap3d1,Cd1d1
GO:0031069	5,8,7,9,10,4,6	hair follicle morphogenesis	19	0.0013	2	0.0029	0.167005	E	Atp7a,Ngfr
GO:0015833	4,5	peptide transport	62	0.0042	4	0.0058	0.16745	E	Glud1,Gpr119,Cplx1,Fam3b
GO:0043523	8,7	regulation of neuron apoptosis	62	0.0042	4	0.0058	0.16745	E	Xrcc2,Kcnip3,Tgfb3,Atp7a
GO:0045664	8,7,9,6	regulation of neuron differentiation	89	0.0061	5	0.0072	0.167618	E	Tgif1,Nrp1,Chrna3,Plxna3,Lbx1
GO:0009416	5	response to light stimulus	89	0.0061	5	0.0072	0.167618	E	Xpa,Dbh,Rpain,Uaca,Opn3
GO:0046328	9,8,7,10,6	regulation of JNK cascade	39	0.0027	3	0.0043	0.168192	E	Map3k1,Tlr3,Myd88
GO:0002708	8,9,6,7	positive regulation of lymphocyte mediated immunity	39	0.0027	3	0.0043	0.168192	E	P2rx7,H60a,Cd1d1
GO:0006479	7,10,9	protein amino acid methylation	39	0.0027	3	0.0043	0.168192	E	Btg2,Eed,Suv39h2
GO:0032569	10,8,9	specific transcription from RNA polymerase II promoter	39	0.0027	3	0.0043	0.168192	E	Zfp238,Pknox1,Lbx1
GO:0010551	10,9,11,8	regulation of specific transcription from RNA polymerase II promoter	39	0.0027	3	0.0043	0.168192	E	Zfp238,Pknox1,Lbx1
GO:0008213	9,8	protein amino acid alkylation	39	0.0027	3	0.0043	0.168192	E	Btg2,Eed,Suv39h2
GO:0002705	7,8,5,6	positive regulation of leukocyte mediated immunity	39	0.0027	3	0.0043	0.168192	E	P2rx7,H60a,Cd1d1
GO:0015837	4,5	amine transport	91	0.0062	5	0.0072	0.170553	E	Slc7a3,P2rx7,Chrna3,Slc43a1,Slc22a21
GO:0048754	6,5	branching morphogenesis of a tube	91	0.0062	5	0.0072	0.170553	E	Foxd1,Tbx20,Nrp1,Vdr,Plxnd1
GO:0035113	6,5	embryonic appendage morphogenesis	92	0.0063	5	0.0072	0.171874	E	Mfsd7b,Fbxw4,Gnas,Chst11,Chd7
GO:0030326	7,6	embryonic limb morphogenesis	92	0.0063	5	0.0072	0.171874	E	Mfsd7b,Fbxw4,Gnas,Chst11,Chd7
GO:0007156	5	homophilic cell adhesion	64	0.0044	4	0.0058	0.173217	E	Fat3,Pik3cb,Cdh22,Dscaml1
GO:0070302	7,6,8,5	regulation of stress-activated protein kinase signaling pathway	40	0.0027	3	0.0043	0.173286	E	Map3k1,Tlr3,Myd88
GO:0006887	6,4,5,7	exocytosis	94	0.0064	5	0.0072	0.174225	E	Sv2b,Unc13a,Cplx2,P2rx7,Cplx1
GO:0032259	5	methylation	65	0.0044	4	0.0058	0.1759	E	Btg2,Eed,Ctcf,Suv39h2
GO:0006664	6,7	glycolipid metabolic process	20	0.0014	2	0.0029	0.176841	E	Aldh5a1,Gba2
GO:0060322	4	head development	20	0.0014	2	0.0029	0.176841	E	Mfsd7b,Plekha1
GO:0006220	8	pyrimidine nucleotide metabolic process	20	0.0014	2	0.0029	0.176841	E	Ctps,Nme4
GO:0046467	5,6,7	membrane lipid biosynthetic process	20	0.0014	2	0.0029	0.176841	E	P2rx7,B4galt6
GO:0006940	7,6	regulation of smooth muscle contraction	20	0.0014	2	0.0029	0.176841	E	Chrna3,Chrnb4
GO:0032200	5	telomere organization	20	0.0014	2	0.0029	0.176841	E	Tinf2,Terf1
GO:0007212	8,7	dopamine receptor signaling pathway	20	0.0014	2	0.0029	0.176841	E	Nsg1,Gnas
GO:0048008	9,8	platelet-derived growth factor receptor signaling pathway	20	0.0014	2	0.0029	0.176841	E	Plekha1,Txnip
GO:0000723	6,7	telomere maintenance	20	0.0014	2	0.0029	0.176841	E	Tinf2,Terf1
GO:0021700	3	developmental maturation	98	0.0067	5	0.0072	0.177769	E	Farp2,Unc13a,Gja1,Fbxo5,Cdc25b
GO:0000187	13,9,10,8,12	activation of MAPK activity	41	0.0028	3	0.0043	0.17818	E	Map3k1,P2rx7,Frs2
GO:0051248	7,6,5	negative regulation of protein metabolic process	99	0.0068	5	0.0072	0.178417	E	Scin,Gclc,Paip2b,Map6d1,Irak3
GO:0042157	5	lipoprotein metabolic process	66	0.0045	4	0.0058	0.178447	E	Hhat,Map6d1,Atg10,Pigl
GO:0042254	4	ribosome biogenesis	101	0.0069	5	0.0072	0.179434	E	Isg20l2,Utp14a,Exosc8,Nop58,Wdr12
GO:0060541	5	respiratory system development	103	0.007	5	0.0072	0.180086	E	Lipa,l7Rn6,Nfib,Atp7a,Chd7
GO:0001822	5,6	kidney development	105	0.0072	5	0.0072	0.180384	E	Foxd1,Slit2,Anxa4,Wwtr1,Gata3
GO:0042330	3,5,4	taxis	105	0.0072	5	0.0072	0.180384	E	Slit2,Dock2,Plxna3,Itga1,Cxcl10
GO:0006935	4,6,5	chemotaxis	105	0.0072	5	0.0072	0.180384	E	Slit2,Dock2,Plxna3,Itga1,Cxcl10
GO:0021537	5,7,8,9,4	telencephalon development	67	0.0046	4	0.0058	0.180856	E	Nde1,Tacc3,Pex13,Plxna3
GO:0051789	4	response to protein stimulus	67	0.0046	4	0.0058	0.180856	E	Ppp1r15a,P2rx7,Eif4a2,Edem3
GO:0010975	6,9,8,5,10,7,11	regulation of neuron projection development	42	0.0029	3	0.0043	0.182868	E	Nrp1,Chrna3,Plxna3
GO:0007249	8,7	I-kappaB kinase/NF-kappaB cascade	42	0.0029	3	0.0043	0.182868	E	Irak1bp1,Tlr3,Myd88
GO:0021953	8,9,6,7	central nervous system neuron differentiation	42	0.0029	3	0.0043	0.182868	E	Dclk1,Atp7a,Plxna3
GO:0042176	6,7,5	regulation of protein catabolic process	42	0.0029	3	0.0043	0.182868	E	Gclc,Arntl,Irak3
GO:0050804	7,8,6	regulation of synaptic transmission	68	0.0046	4	0.0058	0.183125	E	P2rx3,Chrna3,Slc24a2,Nlgn2
GO:0007596	6,4,5	blood coagulation	69	0.0047	4	0.0058	0.185255	E	F2rl2,Mst1,F13a1,Pik3cb
GO:0032623	4	interleukin-2 production	21	0.0014	2	0.0029	0.18627	E	Il1rap,Cd1d1
GO:0032963	5	collagen metabolic process	21	0.0014	2	0.0029	0.18627	E	P2rx7,Mmp9
GO:0031570	7,6	DNA integrity checkpoint	21	0.0014	2	0.0029	0.18627	E	Chek1,Nbn
GO:0016571	9,8,10,11	histone methylation	21	0.0014	2	0.0029	0.18627	E	Eed,Suv39h2
GO:0044087	4,3	regulation of cellular component biogenesis	70	0.0048	4	0.0058	0.187244	E	Scin,Psrc1,Map3k1,Tgfb3
GO:0051402	6	neuron apoptosis	70	0.0048	4	0.0058	0.187244	E	Xrcc2,Kcnip3,Tgfb3,Atp7a
GO:0007599	5,4	hemostasis	70	0.0048	4	0.0058	0.187244	E	F2rl2,Mst1,F13a1,Pik3cb
GO:0045927	5,3,4	positive regulation of growth	43	0.0029	3	0.0043	0.187343	E	Tshr,Chd7,Il7
GO:0051969	6,7,5	regulation of transmission of nerve impulse	71	0.0048	4	0.0058	0.189093	E	P2rx3,Chrna3,Slc24a2,Nlgn2
GO:0007179	9,8	transforming growth factor beta receptor signaling pathway	72	0.0049	4	0.0058	0.190801	E	Map3k1,Chst11,Wfikkn2,Ltbp3
GO:0050817	3	coagulation	72	0.0049	4	0.0058	0.190801	E	F2rl2,Mst1,F13a1,Pik3cb
GO:0006767	5	water-soluble vitamin metabolic process	44	0.003	3	0.0043	0.191602	E	Gclc,Tpk1,Folr1
GO:0035023	9,10,8	regulation of Rho protein signal transduction	73	0.005	4	0.0058	0.192369	E	Farp2,Vav3,E130306D19Rik,Arhgef18
GO:0048469	5,6,4	cell maturation	73	0.005	4	0.0058	0.192369	E	Farp2,Gja1,Fbxo5,Cdc25b
GO:0006766	4	vitamin metabolic process	74	0.005	4	0.0058	0.193797	E	Rdh9,Gclc,Tpk1,Folr1
GO:0042634	5,4	regulation of hair cycle	5	0.0003	1	0.0014	0.194119	E	Ngfr
GO:0002837	6,7,5	regulation of immune response to tumor cell	5	0.0003	1	0.0014	0.194119	E	H60a
GO:0043552	11,12,9,8,10	positive regulation of phosphoinositide 3-kinase activity	5	0.0003	1	0.0014	0.194119	E	Vav3
GO:0043574	6,5	peroxisomal transport	5	0.0003	1	0.0014	0.194119	E	Pex13
GO:0051341	5	regulation of oxidoreductase activity	5	0.0003	1	0.0014	0.194119	E	Vdr
GO:0042904	9,8,7	9-cis-retinoic acid biosynthetic process	5	0.0003	1	0.0014	0.194119	E	Rdh9
GO:0002839	7,8,5,6	positive regulation of immune response to tumor cell	5	0.0003	1	0.0014	0.194119	E	H60a
GO:0006699	7,8,6	bile acid biosynthetic process	5	0.0003	1	0.0014	0.194119	E	Cyp39a1
GO:0002836	7,5,6	positive regulation of response to tumor cell	5	0.0003	1	0.0014	0.194119	E	H60a
GO:0050715	7,8,10,9,5,6	positive regulation of cytokine secretion	5	0.0003	1	0.0014	0.194119	E	P2rx7
GO:0009191	7,10	ribonucleoside diphosphate catabolic process	5	0.0003	1	0.0014	0.194119	E	Entpd7
GO:0046521	8,9	sphingoid catabolic process	5	0.0003	1	0.0014	0.194119	E	Gba2
GO:0046459	6,8,7	short-chain fatty acid metabolic process	5	0.0003	1	0.0014	0.194119	E	Aldh5a1
GO:0008631	11,9,10	induction of apoptosis by oxidative stress	5	0.0003	1	0.0014	0.194119	E	Uaca
GO:0006085	7	acetyl-CoA biosynthetic process	5	0.0003	1	0.0014	0.194119	E	Acss2
GO:0051954	6,7,5,4	positive regulation of amine transport	5	0.0003	1	0.0014	0.194119	E	P2rx7
GO:0006451	8,9,7	translational readthrough	5	0.0003	1	0.0014	0.194119	E	Pstk
GO:0032720	7,5,6	negative regulation of tumor necrosis factor production	5	0.0003	1	0.0014	0.194119	E	Irak3
GO:0001881	6,5	receptor recycling	5	0.0003	1	0.0014	0.194119	E	Ache
GO:0043551	11,8,10,7	regulation of phosphoinositide 3-kinase activity	5	0.0003	1	0.0014	0.194119	E	Vav3
GO:0002834	6,5	regulation of response to tumor cell	5	0.0003	1	0.0014	0.194119	E	H60a
GO:0018409	10,9	peptide or protein amino-terminal blocking	5	0.0003	1	0.0014	0.194119	E	Map6d1
GO:0017144	4	drug metabolic process	5	0.0003	1	0.0014	0.194119	E	Nos1
GO:0051797	6,9,8,10,7,5	regulation of hair follicle development	5	0.0003	1	0.0014	0.194119	E	Ngfr
GO:0032652	6,5	regulation of interleukin-1 production	5	0.0003	1	0.0014	0.194119	E	P2rx7
GO:0006625	5,8,7,6,9	protein targeting to peroxisome	5	0.0003	1	0.0014	0.194119	E	Pex13
GO:0034109	5	homotypic cell-cell adhesion	5	0.0003	1	0.0014	0.194119	E	Ncam1
GO:0043030	7,6,5	regulation of macrophage activation	5	0.0003	1	0.0014	0.194119	E	H60a
GO:0032845	5,6,3,4	negative regulation of homeostatic process	5	0.0003	1	0.0014	0.194119	E	P2rx7
GO:0042424	7,8	catecholamine catabolic process	5	0.0003	1	0.0014	0.194119	E	Dbh
GO:0030212	7,8	hyaluronan metabolic process	5	0.0003	1	0.0014	0.194119	E	Habp4
GO:0014848	7	urinary tract smooth muscle contraction	5	0.0003	1	0.0014	0.194119	E	P2rx3
GO:0019430	6	removal of superoxide radicals	5	0.0003	1	0.0014	0.194119	E	Atp7a
GO:0032651	7,6	regulation of interleukin-1 beta production	5	0.0003	1	0.0014	0.194119	E	P2rx7
GO:0032611	5	interleukin-1 beta production	5	0.0003	1	0.0014	0.194119	E	P2rx7
GO:0019240	8,6,9	citrulline biosynthetic process	5	0.0003	1	0.0014	0.194119	E	Padi4
GO:0045745	8,9,7,6	positive regulation of G-protein coupled receptor protein signaling pathway	5	0.0003	1	0.0014	0.194119	E	Tmod2
GO:0002833	6,4,5	positive regulation of response to biotic stimulus	5	0.0003	1	0.0014	0.194119	E	H60a
GO:0042905	8,6	9-cis-retinoic acid metabolic process	5	0.0003	1	0.0014	0.194119	E	Rdh9
GO:0016188	7,5,6,4,8	synaptic vesicle maturation	5	0.0003	1	0.0014	0.194119	E	Unc13a
GO:0010765	7,8,9,6,10,5	positive regulation of sodium ion transport	5	0.0003	1	0.0014	0.194119	E	Sgk1
GO:0032060	5	bleb formation	5	0.0003	1	0.0014	0.194119	E	P2rx7
GO:0050701	8,6,7,9,5	interleukin-1 secretion	5	0.0003	1	0.0014	0.194119	E	P2rx7
GO:0045213	6,7,5	neurotransmitter receptor metabolic process	5	0.0003	1	0.0014	0.194119	E	Ache
GO:0047496	8,6,7	vesicle transport along microtubule	5	0.0003	1	0.0014	0.194119	E	Nde1
GO:0043266	8,7,9	regulation of potassium ion transport	5	0.0003	1	0.0014	0.194119	E	Nos1
GO:0035238	7	vitamin A biosynthetic process	5	0.0003	1	0.0014	0.194119	E	Rdh9
GO:0042416	8,9	dopamine biosynthetic process	5	0.0003	1	0.0014	0.194119	E	Th
GO:0001514	9,10,8	selenocysteine incorporation	5	0.0003	1	0.0014	0.194119	E	Pstk
GO:0009083	7,8	branched chain family amino acid catabolic process	5	0.0003	1	0.0014	0.194119	E	Auh
GO:0006265	7,6	DNA topological change	5	0.0003	1	0.0014	0.194119	E	Top2a
GO:0015697	5,7,6,8	quaternary ammonium group transport	5	0.0003	1	0.0014	0.194119	E	Slc22a21
GO:0031365	9,8	N-terminal protein amino acid modification	5	0.0003	1	0.0014	0.194119	E	Map6d1
GO:0042487	7,6,8,9,5	regulation of odontogenesis of dentine-containing tooth	5	0.0003	1	0.0014	0.194119	E	Ngfr
GO:0042136	6,8,9,5	neurotransmitter biosynthetic process	5	0.0003	1	0.0014	0.194119	E	Th
GO:0046514	9,10	ceramide catabolic process	5	0.0003	1	0.0014	0.194119	E	Gba2
GO:0002418	4,5	immune response to tumor cell	5	0.0003	1	0.0014	0.194119	E	H60a
GO:0009185	9	ribonucleoside diphosphate metabolic process	5	0.0003	1	0.0014	0.194119	E	Entpd7
GO:0014832	8	urinary bladder smooth muscle contraction	5	0.0003	1	0.0014	0.194119	E	P2rx3
GO:0018101	9,7,10	peptidyl-citrulline biosynthetic process from peptidyl-arginine	5	0.0003	1	0.0014	0.194119	E	Padi4
GO:0046697	5,7,6,8,4	decidualization	5	0.0003	1	0.0014	0.194119	E	Il11ra1
GO:0032612	4	interleukin-1 production	5	0.0003	1	0.0014	0.194119	E	P2rx7
GO:0050650	7,6,9,8	chondroitin sulfate proteoglycan biosynthetic process	5	0.0003	1	0.0014	0.194119	E	Chst11
GO:0043550	10,7,9,6	regulation of lipid kinase activity	5	0.0003	1	0.0014	0.194119	E	Vav3
GO:0048485	6,7,5	sympathetic nervous system development	5	0.0003	1	0.0014	0.194119	E	Gata3
GO:0060291	9,10,7,8	long-term synaptic potentiation	5	0.0003	1	0.0014	0.194119	E	Slc24a2
GO:0015074	7,6	DNA integration	5	0.0003	1	0.0014	0.194119	E	Ppfibp2
GO:0031644	6,5	regulation of neurological system process	75	0.0051	4	0.0058	0.195086	E	P2rx3,Chrna3,Slc24a2,Nlgn2
GO:0007588	5,6,4	excretion	22	0.0015	2	0.0029	0.195267	E	Chrna3,Chrnb4
GO:0046637	10,8,9,7,11,12,6	regulation of alpha-beta T cell differentiation	22	0.0015	2	0.0029	0.195267	E	Ap3d1,Cd1d1
GO:0030316	7,9,10,8	osteoclast differentiation	22	0.0015	2	0.0029	0.195267	E	Gnas,Mitf
GO:0042384	5	cilium assembly	22	0.0015	2	0.0029	0.195267	E	Ift172,Dync2li1
GO:0046620	5,4	regulation of organ growth	22	0.0015	2	0.0029	0.195267	E	Mfsd7b,Il7
GO:0008637	5,6	apoptotic mitochondrial changes	22	0.0015	2	0.0029	0.195267	E	Map3k1,Atp7a
GO:0043122	8,9,7	regulation of I-kappaB kinase/NF-kappaB cascade	22	0.0015	2	0.0029	0.195267	E	Tlr3,Myd88
GO:0044259	4	multicellular organismal macromolecule metabolic process	22	0.0015	2	0.0029	0.195267	E	P2rx7,Mmp9
GO:0008037	3	cell recognition	45	0.0031	3	0.0043	0.195637	E	Nrp1,Mfge8,Dock2
GO:0002699	6,7,4,5	positive regulation of immune effector process	45	0.0031	3	0.0043	0.195637	E	P2rx7,H60a,Cd1d1
GO:0043087	6	regulation of GTPase activity	77	0.0053	4	0.0058	0.197254	E	Vav3,Wdr67,Arhgap1,Tbc1d9
GO:0008654	5,6,7	phospholipid biosynthetic process	78	0.0053	4	0.0058	0.198135	E	Etnk2,Chka,Pigl,Chpt1
GO:0007369	6,5	gastrulation	78	0.0053	4	0.0058	0.198135	E	Txnrd1,Bmpr2,Odz4,Frs2
GO:0048511	2	rhythmic process	79	0.0054	4	0.0058	0.198883	E	Lfng,Arntl,Prokr2,Nfil3
GO:0045580	9,7,8,6,10,11,5	regulation of T cell differentiation	46	0.0031	3	0.0043	0.199448	E	Ap3d1,Cd1d1,Il7
GO:0031349	6,7,4,5	positive regulation of defense response	46	0.0031	3	0.0043	0.199448	E	Myd88,H60a,Irak3
GO:0010769	6,7,5,8	regulation of cell morphogenesis involved in differentiation	46	0.0031	3	0.0043	0.199448	E	Nrp1,Chrna3,Plxna3
GO:0030278	5,7,6,8,4	regulation of ossification	46	0.0031	3	0.0043	0.199448	E	Gnas,P2rx7,Enpp1
GO:0032844	4,5,3	regulation of homeostatic process	46	0.0031	3	0.0043	0.199448	E	Gclc,P2rx7,Cacna1g
GO:0031347	6,5	regulation of defense response	80	0.0055	4	0.0058	0.199501	E	Uaca,Myd88,H60a,Irak3
GO:0051216	6,7,5	cartilage development	81	0.0055	4	0.0058	0.199989	E	Fbxw4,Gnas,Chst11,Atp7a
GO:0001890	5,6	placenta development	81	0.0055	4	0.0058	0.199989	E	Etnk2,Il11ra1,Esx1,Nsdhl
GO:0008361	4	regulation of cell size	82	0.0056	4	0.0058	0.200352	E	Psrc1,Igfbp5,Tgfb3,Rb1cc1
GO:0048589	3	developmental growth	83	0.0057	4	0.0058	0.20059	E	Ncapg2,Chst11,Gja1,Gins1
GO:0051188	5	cofactor biosynthetic process	84	0.0057	4	0.0058	0.200707	E	Mocs2,Gclc,Acss2,Tpk1
GO:0010564	6,5,4	regulation of cell cycle process	47	0.0032	3	0.0043	0.203031	E	Pkia,Cenpe,Fbxo5
GO:0006909	6,5,7	phagocytosis	47	0.0032	3	0.0043	0.203031	E	Lrp1,P2rx7,Mfge8
GO:0002456	6,7	T cell mediated immunity	23	0.0016	2	0.0029	0.203811	E	P2rx7,Cd1d1
GO:0006289	8,7	nucleotide-excision repair	23	0.0016	2	0.0029	0.203811	E	Xpa,Neil3
GO:0051091	9,7,10,8	positive regulation of transcription factor activity	23	0.0016	2	0.0029	0.203811	E	Tlr3,Myd88
GO:0048536	6,7,5	spleen development	23	0.0016	2	0.0029	0.203811	E	Mfsd7b,Nfkb2
GO:0000082	8,5,6,7,4	G1/S transition of mitotic cell cycle	23	0.0016	2	0.0029	0.203811	E	Rbbp8,E2f6
GO:0043254	6,5,4	regulation of protein complex assembly	48	0.0033	3	0.0043	0.206384	E	Scin,Psrc1,Map3k1
GO:0032271	8,7,6,5	regulation of protein polymerization	48	0.0033	3	0.0043	0.206384	E	Scin,Psrc1,Map3k1
GO:0035282	6,5	segmentation	49	0.0033	3	0.0043	0.209507	E	Frs2,Mllt3,Pcsk6
GO:0045761	10,11,6,9,12	regulation of adenylate cyclase activity	49	0.0033	3	0.0043	0.209507	E	Gnas,Tshr,Adcy6
GO:0010498	9,8	proteasomal protein catabolic process	24	0.0016	2	0.0029	0.211888	E	Gclc,Edem3
GO:0060445	7,6,8,9,5	branching involved in salivary gland morphogenesis	24	0.0016	2	0.0029	0.211888	E	Nrp1,Plxnd1
GO:0042267	10,4,8,9,5,7,6	natural killer cell mediated cytotoxicity	24	0.0016	2	0.0029	0.211888	E	Cebpg,H60a
GO:0001709	6,5,4	cell fate determination	24	0.0016	2	0.0029	0.211888	E	Lbx1,Gata3
GO:0021575	5,7,8,9,4	hindbrain morphogenesis	24	0.0016	2	0.0029	0.211888	E	Dlc1,Atp7a
GO:0002228	6,7,5	natural killer cell mediated immunity	24	0.0016	2	0.0029	0.211888	E	Cebpg,H60a
GO:0043161	11,10,9	proteasomal ubiquitin-dependent protein catabolic process	24	0.0016	2	0.0029	0.211888	E	Gclc,Edem3
GO:0050808	4	synapse organization	50	0.0034	3	0.0043	0.212399	E	Ank3,Nlgn2,Ncan
GO:0031279	9,10,5,8,11	regulation of cyclase activity	51	0.0035	3	0.0043	0.215062	E	Gnas,Tshr,Adcy6
GO:0046850	6,5	regulation of bone remodeling	51	0.0035	3	0.0043	0.215062	E	Gnas,P2rx7,Enpp1
GO:0043624	6,5	cellular protein complex disassembly	51	0.0035	3	0.0043	0.215062	E	Scin,Map6d1,Nedd1
GO:0001934	9,10,11,8,7	positive regulation of protein amino acid phosphorylation	51	0.0035	3	0.0043	0.215062	E	Bmpr2,P2rx7,Rb1cc1
GO:0051339	5	regulation of lyase activity	51	0.0035	3	0.0043	0.215062	E	Gnas,Tshr,Adcy6
GO:0001894	6,4	tissue homeostasis	52	0.0035	3	0.0043	0.217496	E	Lipa,P2rx7,Il7
GO:0051101	5	regulation of DNA binding	52	0.0035	3	0.0043	0.217496	E	Tlr3,Myd88,Cebpg
GO:0030183	7,9,10,8,6	B cell differentiation	52	0.0035	3	0.0043	0.217496	E	Hdac9,Tshr,Cebpg
GO:0046456	8,7,9,6	icosanoid biosynthetic process	25	0.0017	2	0.0029	0.219486	E	Ptgs1,Alox15
GO:0031348	6,7,4,5	negative regulation of defense response	25	0.0017	2	0.0029	0.219486	E	Uaca,Irak3
GO:0042327	9,7,8	positive regulation of phosphorylation	53	0.0036	3	0.0043	0.219702	E	Bmpr2,P2rx7,Rb1cc1
GO:0010562	7,5,6	positive regulation of phosphorus metabolic process	53	0.0036	3	0.0043	0.219702	E	Bmpr2,P2rx7,Rb1cc1
GO:0016570	8,9	histone modification	53	0.0036	3	0.0043	0.219702	E	Eed,Suv39h2,Usp21
GO:0030384	7,8	phosphoinositide metabolic process	53	0.0036	3	0.0043	0.219702	E	Pip4k2a,Pik3cb,Pigl
GO:0045937	8,6,7	positive regulation of phosphate metabolic process	53	0.0036	3	0.0043	0.219702	E	Bmpr2,P2rx7,Rb1cc1
GO:0010639	6,4,5	negative regulation of organelle organization	54	0.0037	3	0.0043	0.221684	E	Scin,Cenpe,Map6d1
GO:0030218	7,6,8,9	erythrocyte differentiation	54	0.0037	3	0.0043	0.221684	E	Mfsd7b,Cebpg,Pknox1
GO:0030817	9,10,8,11	regulation of cAMP biosynthetic process	54	0.0037	3	0.0043	0.221684	E	Gnas,Tshr,Adcy6
GO:0032024	7,8,9,10,6,5,11	positive regulation of insulin secretion	6	0.0004	1	0.0014	0.221991	E	Glud1
GO:0019227	6,5	neuronal action potential propagation	6	0.0004	1	0.0014	0.221991	E	Scn1a
GO:0007413	7,9,8,5,12,10,13,11	axonal fasciculation	6	0.0004	1	0.0014	0.221991	E	Nrp1
GO:0000070	6,7,9,8,5	mitotic sister chromatid segregation	6	0.0004	1	0.0014	0.221991	E	Nek2
GO:0001779	7,9,10,8,6	natural killer cell differentiation	6	0.0004	1	0.0014	0.221991	E	Il11ra1
GO:0035121	5,4	tail morphogenesis	6	0.0004	1	0.0014	0.221991	E	Chst11
GO:0060745	9,8,10,11,12,7,5,6	mammary gland branching involved in pregnancy	6	0.0004	1	0.0014	0.221991	E	Vdr
GO:0048703	8,6,9,10,7,5	embryonic viscerocranium morphogenesis	6	0.0004	1	0.0014	0.221991	E	Chst11
GO:0016338	5	calcium-independent cell-cell adhesion	6	0.0004	1	0.0014	0.221991	E	Dscaml1
GO:0016048	5	detection of temperature stimulus	6	0.0004	1	0.0014	0.221991	E	Ngfr
GO:0000038	6,8,7	very-long-chain fatty acid metabolic process	6	0.0004	1	0.0014	0.221991	E	Hsd17b4
GO:0043526	9,8	neuroprotection	6	0.0004	1	0.0014	0.221991	E	Atp7a
GO:0034968	10,9,11,12	histone lysine methylation	6	0.0004	1	0.0014	0.221991	E	Suv39h2
GO:0048664	9,10,7,6,5	neuron fate determination	6	0.0004	1	0.0014	0.221991	E	Lbx1
GO:0000052	7,8	citrulline metabolic process	6	0.0004	1	0.0014	0.221991	E	Padi4
GO:0042481	6,5,7,8,4	regulation of odontogenesis	6	0.0004	1	0.0014	0.221991	E	Ngfr
GO:0007094	10,9,8,11,12,7,6	mitotic cell cycle spindle assembly checkpoint	6	0.0004	1	0.0014	0.221991	E	Cenpe
GO:0040023	5,6,4	establishment of nucleus localization	6	0.0004	1	0.0014	0.221991	E	Slit1
GO:0042362	6	fat-soluble vitamin biosynthetic process	6	0.0004	1	0.0014	0.221991	E	Rdh9
GO:0040036	7,10,6,9	regulation of fibroblast growth factor receptor signaling pathway	6	0.0004	1	0.0014	0.221991	E	Ngfr
GO:0006706	6,7	steroid catabolic process	6	0.0004	1	0.0014	0.221991	E	Cyp39a1
GO:0045841	9,8,7,10,11,6,5	negative regulation of mitotic metaphase/anaphase transition	6	0.0004	1	0.0014	0.221991	E	Cenpe
GO:0010833	7,8	telomere maintenance via telomere lengthening	6	0.0004	1	0.0014	0.221991	E	Terf1
GO:0014051	6,4,8,9,10	gamma-aminobutyric acid secretion	6	0.0004	1	0.0014	0.221991	E	P2rx7
GO:0031577	7,6	spindle checkpoint	6	0.0004	1	0.0014	0.221991	E	Cenpe
GO:0008209	7,6,5	androgen metabolic process	6	0.0004	1	0.0014	0.221991	E	Srd5a1
GO:0000819	5,4	sister chromatid segregation	6	0.0004	1	0.0014	0.221991	E	Nek2
GO:0032494	6,5,7	response to peptidoglycan	6	0.0004	1	0.0014	0.221991	E	Irak3
GO:0046835	5,7,6	carbohydrate phosphorylation	6	0.0004	1	0.0014	0.221991	E	Gnptab
GO:0045824	7,8,5,6	negative regulation of innate immune response	6	0.0004	1	0.0014	0.221991	E	Irak3
GO:0006942	7,6	regulation of striated muscle contraction	6	0.0004	1	0.0014	0.221991	E	Cacna1g
GO:0006656	7,8,9	phosphatidylcholine biosynthetic process	6	0.0004	1	0.0014	0.221991	E	Chka
GO:0048596	8,9,10,7,4,5,6	embryonic camera-type eye morphogenesis	6	0.0004	1	0.0014	0.221991	E	Th
GO:0045123	7,4,8,6	cellular extravasation	6	0.0004	1	0.0014	0.221991	E	Itga1
GO:0043403	7,8,6,5	skeletal muscle regeneration	6	0.0004	1	0.0014	0.221991	E	Gja1
GO:0009134	6,9	nucleoside diphosphate catabolic process	6	0.0004	1	0.0014	0.221991	E	Entpd7
GO:0019377	7,8	glycolipid catabolic process	6	0.0004	1	0.0014	0.221991	E	Gba2
GO:0008215	8	spermine metabolic process	6	0.0004	1	0.0014	0.221991	E	Sat1
GO:0007004	8,9	telomere maintenance via telomerase	6	0.0004	1	0.0014	0.221991	E	Terf1
GO:0042307	8,7,9,10,11,6,5	positive regulation of protein import into nucleus	6	0.0004	1	0.0014	0.221991	E	Uaca
GO:0006004	7,8	fucose metabolic process	6	0.0004	1	0.0014	0.221991	E	Fuca2
GO:0015812	7,8,9	gamma-aminobutyric acid transport	6	0.0004	1	0.0014	0.221991	E	P2rx7
GO:0045619	8,6,7,5,9,10,4	regulation of lymphocyte differentiation	55	0.0038	3	0.0043	0.223444	E	Ap3d1,Cd1d1,Il7
GO:0032870	4,5	cellular response to hormone stimulus	55	0.0038	3	0.0043	0.223444	E	Sgk1,Adipor2,Ptpn2
GO:0009894	5,4	regulation of catabolic process	55	0.0038	3	0.0043	0.223444	E	Gclc,Arntl,Irak3
GO:0048871	5,3	multicellular organismal homeostasis	55	0.0038	3	0.0043	0.223444	E	Lipa,P2rx7,Il7
GO:0007565	3,4	female pregnancy	56	0.0038	3	0.0043	0.224986	E	Mst1,Il11ra1,Vdr
GO:0030814	9,10,8	regulation of cAMP metabolic process	56	0.0038	3	0.0043	0.224986	E	Gnas,Tshr,Adcy6
GO:0016569	7	covalent chromatin modification	57	0.0039	3	0.0043	0.226313	E	Eed,Suv39h2,Usp21
GO:0002573	6,8,9,7	myeloid leukocyte differentiation	57	0.0039	3	0.0043	0.226313	E	Casp8,Gnas,Mitf
GO:0019221	7,6	cytokine-mediated signaling pathway	57	0.0039	3	0.0043	0.226313	E	Il1rap,Il11ra1,Irak3
GO:0046635	10,9,8,7	positive regulation of alpha-beta T cell activation	26	0.0018	2	0.0029	0.226597	E	Ap3d1,Cd1d1
GO:0006029	5,7,6	proteoglycan metabolic process	26	0.0018	2	0.0029	0.226597	E	Man1c1,Chst11
GO:0043588	8,7,9,6	skin development	26	0.0018	2	0.0029	0.226597	E	Atp7a,Ngfr
GO:0040018	6,4,5	positive regulation of multicellular organism growth	26	0.0018	2	0.0029	0.226597	E	Tshr,Chd7
GO:0006826	7,8,9	iron ion transport	26	0.0018	2	0.0029	0.226597	E	Mmgt1,Sfxn4
GO:0034101	6	erythrocyte homeostasis	58	0.004	3	0.0043	0.227429	E	Mfsd7b,Cebpg,Pknox1
GO:0006865	5,6,7	amino acid transport	58	0.004	3	0.0043	0.227429	E	Slc7a3,P2rx7,Slc43a1
GO:0030808	7,8,6,9	regulation of nucleotide biosynthetic process	58	0.004	3	0.0043	0.227429	E	Gnas,Tshr,Adcy6
GO:0048568	5,6,4	embryonic organ development	58	0.004	3	0.0043	0.227429	E	Mkl2,Th,Stil
GO:0030802	8,9,7,10	regulation of cyclic nucleotide biosynthetic process	58	0.004	3	0.0043	0.227429	E	Gnas,Tshr,Adcy6
GO:0006171	10	cAMP biosynthetic process	59	0.004	3	0.0043	0.228338	E	Gnas,Tshr,Adcy6
GO:0007346	6,5	regulation of mitotic cell cycle	60	0.0041	3	0.0043	0.229046	E	Pkia,Cenpe,Fbxo5
GO:0030799	8,9,7	regulation of cyclic nucleotide metabolic process	61	0.0042	3	0.0043	0.229557	E	Gnas,Tshr,Adcy6
GO:0006140	7,8,6	regulation of nucleotide metabolic process	62	0.0042	3	0.0043	0.229877	E	Gnas,Tshr,Adcy6
GO:0008344	4,5	adult locomotory behavior	63	0.0043	3	0.0043	0.230011	E	Scn1a,Tshr,Chd7
GO:0030902	4,6,7,8	hindbrain development	63	0.0043	3	0.0043	0.230011	E	Nfib,Dlc1,Atp7a
GO:0007628	5,6	adult walking behavior	27	0.0018	2	0.0029	0.233219	E	Scn1a,Chd7
GO:0009612	4	response to mechanical stimulus	27	0.0018	2	0.0029	0.233219	E	Etv1,P2rx7
GO:0034330	3	cell junction organization	27	0.0018	2	0.0029	0.233219	E	Dlc1,Tln1
GO:0019884	4	antigen processing and presentation of exogenous antigen	27	0.0018	2	0.0029	0.233219	E	Ap3d1,Cd1d1
GO:0009451	7,6	RNA modification	28	0.0019	2	0.0029	0.239349	E	Qtrtd1,Mettl1
GO:0044236	3	multicellular organismal metabolic process	28	0.0019	2	0.0029	0.239349	E	P2rx7,Mmp9
GO:0051705	3,4	behavioral interaction between organisms	28	0.0019	2	0.0029	0.239349	E	Th,Pex13
GO:0010959	7,6,8	regulation of metal ion transport	28	0.0019	2	0.0029	0.239349	E	Nos1,Sgk1
GO:0007189	13,14,10,12,11,9,15	activation of adenylate cyclase activity by G-protein signaling pathway	28	0.0019	2	0.0029	0.239349	E	Gnas,Tshr
GO:0030203	6,7	glycosaminoglycan metabolic process	28	0.0019	2	0.0029	0.239349	E	Chst11,Habp4
GO:0010579	12,13,11,8,10,14	positive regulation of adenylate cyclase activity by G-protein signaling pathway	28	0.0019	2	0.0029	0.239349	E	Gnas,Tshr
GO:0010578	11,12,10,7,9,13	regulation of adenylate cyclase activity involved in G-protein signaling	28	0.0019	2	0.0029	0.239349	E	Gnas,Tshr
GO:0006022	5,6	aminoglycan metabolic process	28	0.0019	2	0.0029	0.239349	E	Chst11,Habp4
GO:0030282	6,7,8,4	bone mineralization	29	0.002	2	0.0029	0.24499	E	P2rx7,Alox15
GO:0007623	3	circadian rhythm	29	0.002	2	0.0029	0.24499	E	Arntl,Prokr2
GO:0002761	7,6,9,10,8,5	regulation of myeloid leukocyte differentiation	29	0.002	2	0.0029	0.24499	E	Gnas,Mitf
GO:0006023	6,7	aminoglycan biosynthetic process	7	0.0005	1	0.0014	0.246811	E	Chst11
GO:0060527	9,7,10,6,8,11	prostate epithelial cord arborization involved in prostate glandular acinus morphogenesis	7	0.0005	1	0.0014	0.246811	E	Frs2
GO:0032434	7,8,9,12,11,10,6	regulation of proteasomal ubiquitin-dependent protein catabolic process	7	0.0005	1	0.0014	0.246811	E	Gclc
GO:0043271	6,7,5,4	negative regulation of ion transport	7	0.0005	1	0.0014	0.246811	E	Nos1
GO:0051668	4	localization within membrane	7	0.0005	1	0.0014	0.246811	E	Dock2
GO:0006906	5,4,6	vesicle fusion	7	0.0005	1	0.0014	0.246811	E	Vav3
GO:0051784	7,5,6	negative regulation of nuclear division	7	0.0005	1	0.0014	0.246811	E	Cenpe
GO:0006024	7,8	glycosaminoglycan biosynthetic process	7	0.0005	1	0.0014	0.246811	E	Chst11
GO:0060271	5,6,7,8	cilium morphogenesis	7	0.0005	1	0.0014	0.246811	E	Wwtr1
GO:0018205	9,8	peptidyl-lysine modification	7	0.0005	1	0.0014	0.246811	E	Atp7a
GO:0050805	8,9,6,7	negative regulation of synaptic transmission	7	0.0005	1	0.0014	0.246811	E	Slc24a2
GO:0051970	7,8,6,5	negative regulation of transmission of nerve impulse	7	0.0005	1	0.0014	0.246811	E	Slc24a2
GO:0050773	7,10,9,6,11,8,12,5	regulation of dendrite development	7	0.0005	1	0.0014	0.246811	E	Chrna3
GO:0051298	9,8,7,6,5	centrosome duplication	7	0.0005	1	0.0014	0.246811	E	Nde1
GO:0030432	8	peristalsis	7	0.0005	1	0.0014	0.246811	E	P2rx3
GO:0001736	6,9,8,10,5,7	establishment of planar polarity	7	0.0005	1	0.0014	0.246811	E	Fzd3
GO:0032846	5,6,3,4	positive regulation of homeostatic process	7	0.0005	1	0.0014	0.246811	E	P2rx7
GO:0031122	6,5	cytoplasmic microtubule organization	7	0.0005	1	0.0014	0.246811	E	Tacc3
GO:0006278	8,7	RNA-dependent DNA replication	7	0.0005	1	0.0014	0.246811	E	Terf1
GO:0048041	6	focal adhesion formation	7	0.0005	1	0.0014	0.246811	E	Dlc1
GO:0014047	6,4,5,7	glutamate secretion	7	0.0005	1	0.0014	0.246811	E	P2rx7
GO:0006516	6	glycoprotein catabolic process	7	0.0005	1	0.0014	0.246811	E	Edem3
GO:0048149	4,5,6	behavioral response to ethanol	7	0.0005	1	0.0014	0.246811	E	Dbh
GO:0007164	5,4	establishment of tissue polarity	7	0.0005	1	0.0014	0.246811	E	Fzd3
GO:0019720	7	Mo-molybdopterin cofactor metabolic process	7	0.0005	1	0.0014	0.246811	E	Mocs2
GO:0032324	7	molybdopterin cofactor biosynthetic process	7	0.0005	1	0.0014	0.246811	E	Mocs2
GO:0002360	8,6,5,10,11,9,7	T cell lineage commitment	7	0.0005	1	0.0014	0.246811	E	Il7
GO:0043545	6	molybdopterin cofactor metabolic process	7	0.0005	1	0.0014	0.246811	E	Mocs2
GO:0002063	5,6,8,9,7	chondrocyte development	7	0.0005	1	0.0014	0.246811	E	Chst11
GO:0015718	6,7	monocarboxylic acid transport	7	0.0005	1	0.0014	0.246811	E	P2rx7
GO:0060526	8,9,5,7,10	prostate glandular acinus morphogenesis	7	0.0005	1	0.0014	0.246811	E	Frs2
GO:0060056	7,8,9,6,4	mammary gland involution	7	0.0005	1	0.0014	0.246811	E	Vdr
GO:0045840	8,7,6,9,10,5	positive regulation of mitosis	7	0.0005	1	0.0014	0.246811	E	Cenpe
GO:0006750	7,6	glutathione biosynthetic process	7	0.0005	1	0.0014	0.246811	E	Gclc
GO:0014821	7	phasic smooth muscle contraction	7	0.0005	1	0.0014	0.246811	E	P2rx3
GO:0048814	7,8,11,10,9,6,12,13	regulation of dendrite morphogenesis	7	0.0005	1	0.0014	0.246811	E	Chrna3
GO:0051785	7,6,5	positive regulation of nuclear division	7	0.0005	1	0.0014	0.246811	E	Cenpe
GO:0043353	8,7,9,10	enucleate erythrocyte differentiation	7	0.0005	1	0.0014	0.246811	E	Cebpg
GO:0006777	7,8	Mo-molybdopterin cofactor biosynthetic process	7	0.0005	1	0.0014	0.246811	E	Mocs2
GO:0009048	9,8	dosage compensation, by inactivation of X chromosome	7	0.0005	1	0.0014	0.246811	E	Ctcf
GO:0045124	5,7,8,6,4	regulation of bone resorption	7	0.0005	1	0.0014	0.246811	E	P2rx7
GO:0048384	8,7	retinoic acid receptor signaling pathway	7	0.0005	1	0.0014	0.246811	E	Tgif1
GO:0045839	8,7,6,9,10,5	negative regulation of mitosis	7	0.0005	1	0.0014	0.246811	E	Cenpe
GO:0046513	8,9,10	ceramide biosynthetic process	7	0.0005	1	0.0014	0.246811	E	P2rx7
GO:0045793	5	positive regulation of cell size	7	0.0005	1	0.0014	0.246811	E	Rb1cc1
GO:0043388	6	positive regulation of DNA binding	30	0.002	2	0.0029	0.250145	E	Tlr3,Myd88
GO:0006690	6,8,7	icosanoid metabolic process	30	0.002	2	0.0029	0.250145	E	Ptgs1,Alox15
GO:0007405	4,7,8	neuroblast proliferation	30	0.002	2	0.0029	0.250145	E	Nde1,Frs2
GO:0006261	8,7	DNA-dependent DNA replication	30	0.002	2	0.0029	0.250145	E	Rpain,Prim1
GO:0060041	8,4,9	retina development in camera-type eye	31	0.0021	2	0.0029	0.254821	E	Tgif1,Ache
GO:0031214	6,7,5	biomineral formation	31	0.0021	2	0.0029	0.254821	E	P2rx7,Alox15
GO:0019233	7	sensory perception of pain	31	0.0021	2	0.0029	0.254821	E	Kcnip3,P2rx7
GO:0021515	5,7,8	cell differentiation in spinal cord	31	0.0021	2	0.0029	0.254821	E	Pax3,Lbx1
GO:0043543	8,7	protein amino acid acylation	31	0.0021	2	0.0029	0.254821	E	Hhat,Map6d1
GO:0007435	6,7,8,5	salivary gland morphogenesis	31	0.0021	2	0.0029	0.254821	E	Nrp1,Plxnd1
GO:0006402	8,7	mRNA catabolic process	31	0.0021	2	0.0029	0.254821	E	Auh,Zhx2
GO:0008629	10,8,9	induction of apoptosis by intracellular signals	31	0.0021	2	0.0029	0.254821	E	Xpa,Uaca
GO:0043242	6,7,4,5	negative regulation of protein complex disassembly	32	0.0022	2	0.0029	0.259025	E	Scin,Map6d1
GO:0009636	4	response to toxin	32	0.0022	2	0.0029	0.259025	E	Xpa,Atp7a
GO:0001702	7,6	gastrulation with mouth forming second	32	0.0022	2	0.0029	0.259025	E	Odz4,Frs2
GO:0051099	5	positive regulation of binding	32	0.0022	2	0.0029	0.259025	E	Tlr3,Myd88
GO:0006401	7,6	RNA catabolic process	32	0.0022	2	0.0029	0.259025	E	Auh,Zhx2
GO:0002824	8,6,7	positive regulation of adaptive immune response based on somatic recombination of immune receptors built from immunoglobulin superfamily domains	33	0.0023	2	0.0029	0.262767	E	P2rx7,Cd1d1
GO:0043269	6,5	regulation of ion transport	33	0.0023	2	0.0029	0.262767	E	Nos1,Sgk1
GO:0006986	4,5	response to unfolded protein	33	0.0023	2	0.0029	0.262767	E	Ppp1r15a,Edem3
GO:0002821	7,5,6	positive regulation of adaptive immune response	33	0.0023	2	0.0029	0.262767	E	P2rx7,Cd1d1
GO:0032313	10,11,8,9	regulation of Rab GTPase activity	34	0.0023	2	0.0029	0.266057	E	Wdr67,Tbc1d9
GO:0001707	5,7,8,9,6	mesoderm formation	34	0.0023	2	0.0029	0.266057	E	Txnrd1,Bmpr2
GO:0032482	9,8	Rab protein signal transduction	34	0.0023	2	0.0029	0.266057	E	Wdr67,Tbc1d9
GO:0046634	9,8,7	regulation of alpha-beta T cell activation	34	0.0023	2	0.0029	0.266057	E	Ap3d1,Cd1d1
GO:0050768	8,7,6,9	negative regulation of neurogenesis	34	0.0023	2	0.0029	0.266057	E	Nrp1,Plxna3
GO:0060021	4	palate development	34	0.0023	2	0.0029	0.266057	E	Plekha1,Chd7
GO:0032483	9,10,8	regulation of Rab protein signal transduction	34	0.0023	2	0.0029	0.266057	E	Wdr67,Tbc1d9
GO:0060711	5,4,7,8,9	labyrinthine layer development	34	0.0023	2	0.0029	0.266057	E	Esx1,Nsdhl
GO:0007270	6,7	nerve-nerve synaptic transmission	34	0.0023	2	0.0029	0.266057	E	Tmod2,Th
GO:0035265	3	organ growth	34	0.0023	2	0.0029	0.266057	E	Mfsd7b,Il7
GO:0042278	7	purine nucleoside metabolic process	8	0.0005	1	0.0014	0.268806	E	Qtrtd1
GO:0009086	8,9,7	methionine biosynthetic process	8	0.0005	1	0.0014	0.268806	E	Mri1
GO:0006354	9,7,8,6	RNA elongation	8	0.0005	1	0.0014	0.268806	E	2210012G02Rik
GO:0046036	11	CTP metabolic process	8	0.0005	1	0.0014	0.268806	E	Nme4
GO:0045778	6,8,7,9,4,5	positive regulation of ossification	8	0.0005	1	0.0014	0.268806	E	P2rx7
GO:0046128	8	purine ribonucleoside metabolic process	8	0.0005	1	0.0014	0.268806	E	Qtrtd1
GO:0001893	4,6,7	maternal placenta development	8	0.0005	1	0.0014	0.268806	E	Il11ra1
GO:0035020	9,10,8	regulation of Rac protein signal transduction	8	0.0005	1	0.0014	0.268806	E	Dock2
GO:0046051	11	UTP metabolic process	8	0.0005	1	0.0014	0.268806	E	Nme4
GO:0019794	6,7	nonprotein amino acid metabolic process	8	0.0005	1	0.0014	0.268806	E	Padi4
GO:0002831	5,4	regulation of response to biotic stimulus	8	0.0005	1	0.0014	0.268806	E	H60a
GO:0018195	9,8	peptidyl-arginine modification	8	0.0005	1	0.0014	0.268806	E	Padi4
GO:0000188	13,9,10,8,12	inactivation of MAPK activity	8	0.0005	1	0.0014	0.268806	E	Dusp19
GO:0007638	4,5	mechanosensory behavior	8	0.0005	1	0.0014	0.268806	E	Etv1
GO:0009143	6,9	nucleoside triphosphate catabolic process	8	0.0005	1	0.0014	0.268806	E	Entpd7
GO:0030838	9,10,8,11,7,6	positive regulation of actin filament polymerization	8	0.0005	1	0.0014	0.268806	E	Map3k1
GO:0002347	4	response to tumor cell	8	0.0005	1	0.0014	0.268806	E	H60a
GO:0002645	6,4,5	positive regulation of tolerance induction	8	0.0005	1	0.0014	0.268806	E	Irak3
GO:0009755	7,6,5	hormone-mediated signaling	8	0.0005	1	0.0014	0.268806	E	Adipor2
GO:0006228	12	UTP biosynthetic process	8	0.0005	1	0.0014	0.268806	E	Nme4
GO:0006241	12	CTP biosynthetic process	8	0.0005	1	0.0014	0.268806	E	Nme4
GO:0000288	10,9	nuclear-transcribed mRNA catabolic process, deadenylation-dependent decay	8	0.0005	1	0.0014	0.268806	E	Auh
GO:0000084	8,7,6	S phase of mitotic cell cycle	8	0.0005	1	0.0014	0.268806	E	Anp32b
GO:0051320	7,6,5	S phase	8	0.0005	1	0.0014	0.268806	E	Anp32b
GO:0002643	5,4	regulation of tolerance induction	8	0.0005	1	0.0014	0.268806	E	Irak3
GO:0031396	8,9,10,11,7	regulation of protein ubiquitination	8	0.0005	1	0.0014	0.268806	E	Gclc
GO:0009208	10	pyrimidine ribonucleoside triphosphate metabolic process	8	0.0005	1	0.0014	0.268806	E	Nme4
GO:0046520	7,8,9	sphingoid biosynthetic process	8	0.0005	1	0.0014	0.268806	E	P2rx7
GO:0009263	9	deoxyribonucleotide biosynthetic process	8	0.0005	1	0.0014	0.268806	E	Rrm2
GO:0046854	7,8,9	phosphoinositide phosphorylation	8	0.0005	1	0.0014	0.268806	E	Pik3cb
GO:0007191	14,15,9,11,13,12,10,8,16	activation of adenylate cyclase activity by dopamine receptor signaling pathway	8	0.0005	1	0.0014	0.268806	E	Gnas
GO:0015695	6,7	organic cation transport	8	0.0005	1	0.0014	0.268806	E	Slc22a21
GO:0006884	6,4	cell volume homeostasis	8	0.0005	1	0.0014	0.268806	E	P2rx7
GO:0009209	11	pyrimidine ribonucleoside triphosphate biosynthetic process	8	0.0005	1	0.0014	0.268806	E	Nme4
GO:0046824	7,8,9,6,5	positive regulation of nucleocytoplasmic transport	8	0.0005	1	0.0014	0.268806	E	Uaca
GO:0007271	6,7	synaptic transmission, cholinergic	8	0.0005	1	0.0014	0.268806	E	Chrna3
GO:0046339	7,6,8	diacylglycerol metabolic process	8	0.0005	1	0.0014	0.268806	E	Ppap2a
GO:0060491	5,6,4	regulation of cell projection assembly	8	0.0005	1	0.0014	0.268806	E	Tgfb3
GO:0051047	6,7,5,4	positive regulation of secretion	35	0.0024	2	0.0029	0.268907	E	Glud1,P2rx7
GO:0048167	8,9,7	regulation of synaptic plasticity	35	0.0024	2	0.0029	0.268907	E	P2rx3,Slc24a2
GO:0007431	6,7	salivary gland development	35	0.0024	2	0.0029	0.268907	E	Nrp1,Plxnd1
GO:0048332	7,6,8,5	mesoderm morphogenesis	35	0.0024	2	0.0029	0.268907	E	Txnrd1,Bmpr2
GO:0007127	9,7,6,8,5	meiosis I	35	0.0024	2	0.0029	0.268907	E	Espl1,Fbxo5
GO:0010721	7,5,6	negative regulation of cell development	36	0.0025	2	0.0029	0.27133	E	Nrp1,Plxna3
GO:0048477	6,5	oogenesis	36	0.0025	2	0.0029	0.27133	E	Fbxo5,Cdc25b
GO:0030100	5,6,7,4	regulation of endocytosis	36	0.0025	2	0.0029	0.27133	E	Rufy1,Mfge8
GO:0050770	7,8,10,9,6,12,11,13	regulation of axonogenesis	36	0.0025	2	0.0029	0.27133	E	Nrp1,Plxna3
GO:0006941	6	striated muscle contraction	37	0.0025	2	0.0029	0.273339	E	Nos1,Cacna1g
GO:0009306	6,4,5,7	protein secretion	37	0.0025	2	0.0029	0.273339	E	P2rx7,Gnptab
GO:0001704	4,6,7,5	formation of primary germ layer	38	0.0026	2	0.0029	0.274949	E	Txnrd1,Bmpr2
GO:0046474	6,7,8	glycerophospholipid biosynthetic process	38	0.0026	2	0.0029	0.274949	E	Chka,Pigl
GO:0035272	5	exocrine system development	38	0.0026	2	0.0029	0.274949	E	Nrp1,Plxnd1
GO:0008652	6,7	cellular amino acid biosynthetic process	39	0.0027	2	0.0029	0.276174	E	Got2,Mri1
GO:0050900	6,3,7,5	leukocyte migration	39	0.0027	2	0.0029	0.276174	E	Dbh,Itga1
GO:0006112	6	energy reserve metabolic process	40	0.0027	2	0.0029	0.277029	E	Gnas,Phkg2
GO:0001889	5,6	liver development	40	0.0027	2	0.0029	0.277029	E	Mkl2,Rb1cc1
GO:0006800	4	oxygen and reactive oxygen species metabolic process	40	0.0027	2	0.0029	0.277029	E	P2rx7,Atp7a
GO:0002274	5,4	myeloid leukocyte activation	41	0.0028	2	0.0029	0.277529	E	Cplx2,H60a
GO:0051052	7,6,5	regulation of DNA metabolic process	42	0.0029	2	0.0029	0.277691	E	Ctcf,Cebpg
GO:0051494	7,5,6	negative regulation of cytoskeleton organization	42	0.0029	2	0.0029	0.277691	E	Scin,Map6d1
GO:0033077	8,10,11,9,7	T cell differentiation in the thymus	42	0.0029	2	0.0029	0.277691	E	Dock2,Cd1d1
GO:0050707	7,9,8,6,5	regulation of cytokine secretion	9	0.0006	1	0.0014	0.288185	E	P2rx7
GO:0045429	8,7,6,5	positive regulation of nitric oxide biosynthetic process	9	0.0006	1	0.0014	0.288185	E	H60a
GO:0009225	5	nucleotide-sugar metabolic process	9	0.0006	1	0.0014	0.288185	E	Gmds
GO:0060525	7,4,6,8	prostate glandular acinus development	9	0.0006	1	0.0014	0.288185	E	Frs2
GO:0046039	11	GTP metabolic process	9	0.0006	1	0.0014	0.288185	E	Nme4
GO:0021692	6,5,7,8,9,10,11,12,13,4	cerebellar Purkinje cell layer morphogenesis	9	0.0006	1	0.0014	0.288185	E	Atp7a
GO:0046852	7,5,6	positive regulation of bone remodeling	9	0.0006	1	0.0014	0.288185	E	P2rx7
GO:0051592	6	response to calcium ion	9	0.0006	1	0.0014	0.288185	E	P2rx7
GO:0001516	10,9,11,8	prostaglandin biosynthetic process	9	0.0006	1	0.0014	0.288185	E	Ptgs1
GO:0001967	4,5	suckling behavior	9	0.0006	1	0.0014	0.288185	E	Pex13
GO:0030866	6,5	cortical actin cytoskeleton organization	9	0.0006	1	0.0014	0.288185	E	Tln1
GO:0046834	6,7	lipid phosphorylation	9	0.0006	1	0.0014	0.288185	E	Pik3cb
GO:0001959	7,8,6	regulation of cytokine-mediated signaling pathway	9	0.0006	1	0.0014	0.288185	E	Irak3
GO:0046463	6,7,8	acylglycerol biosynthetic process	9	0.0006	1	0.0014	0.288185	E	Ppap2a
GO:0045060	10,12,13,11,9,5	negative thymic T cell selection	9	0.0006	1	0.0014	0.288185	E	Dock2
GO:0046457	9,8,10,7	prostanoid biosynthetic process	9	0.0006	1	0.0014	0.288185	E	Ptgs1
GO:0021702	6,5,8,9,7,10,11,12,13,14,15	cerebellar Purkinje cell differentiation	9	0.0006	1	0.0014	0.288185	E	Atp7a
GO:0043383	9,11,12,10,8,4	negative T cell selection	9	0.0006	1	0.0014	0.288185	E	Dock2
GO:0007549	8,7	dosage compensation	9	0.0006	1	0.0014	0.288185	E	Ctcf
GO:0006183	12	GTP biosynthetic process	9	0.0006	1	0.0014	0.288185	E	Nme4
GO:0045047	8,7,9	protein targeting to ER	9	0.0006	1	0.0014	0.288185	E	Folr1
GO:0006525	7,8	arginine metabolic process	9	0.0006	1	0.0014	0.288185	E	Ddah2
GO:0034654	5	nucleobase, nucleoside, nucleotide and nucleic acid biosynthetic process	9	0.0006	1	0.0014	0.288185	E	Qtrtd1
GO:0043584	6,7	nose development	9	0.0006	1	0.0014	0.288185	E	Chd7
GO:0007379	5,6,7	segment specification	9	0.0006	1	0.0014	0.288185	E	Mllt3
GO:0009261	6,9	ribonucleotide catabolic process	9	0.0006	1	0.0014	0.288185	E	Entpd7
GO:0009147	9	pyrimidine nucleoside triphosphate metabolic process	9	0.0006	1	0.0014	0.288185	E	Nme4
GO:0034404	6	nucleobase, nucleoside and nucleotide biosynthetic process	9	0.0006	1	0.0014	0.288185	E	Qtrtd1
GO:0030903	6,7,5	notochord development	9	0.0006	1	0.0014	0.288185	E	Stil
GO:0045086	9,8,7,6	positive regulation of interleukin-2 biosynthetic process	9	0.0006	1	0.0014	0.288185	E	Cd1d1
GO:0021694	5,4,7,6,8,9,10,11,12,13,14	cerebellar Purkinje cell layer formation	9	0.0006	1	0.0014	0.288185	E	Atp7a
GO:0045351	7,5	type I interferon biosynthetic process	9	0.0006	1	0.0014	0.288185	E	Myd88
GO:0042246	6,7,5,4	tissue regeneration	9	0.0006	1	0.0014	0.288185	E	Gja1
GO:0040020	7,9,6,8,5	regulation of meiosis	9	0.0006	1	0.0014	0.288185	E	Fbxo5
GO:0006406	10,9,6,8,7	mRNA export from nucleus	9	0.0006	1	0.0014	0.288185	E	Gle1
GO:0002793	7,8,6,5	positive regulation of peptide secretion	9	0.0006	1	0.0014	0.288185	E	Glud1
GO:0045862	8,9,6,7	positive regulation of proteolysis	9	0.0006	1	0.0014	0.288185	E	Gclc
GO:0033057	5,4	reproductive behavior in a multicellular organism	9	0.0006	1	0.0014	0.288185	E	Dbh
GO:0006555	7,8,6	methionine metabolic process	9	0.0006	1	0.0014	0.288185	E	Mri1
GO:0046460	5,6,7	neutral lipid biosynthetic process	9	0.0006	1	0.0014	0.288185	E	Ppap2a
GO:0048488	6,5,7	synaptic vesicle endocytosis	9	0.0006	1	0.0014	0.288185	E	Unc13a
GO:0043467	6,5	regulation of generation of precursor metabolites and energy	9	0.0006	1	0.0014	0.288185	E	Atp7a
GO:0046488	8,9	phosphatidylinositol metabolic process	10	0.0007	1	0.0014	0.305146	E	Pip4k2a
GO:0046622	6,4,5	positive regulation of organ growth	10	0.0007	1	0.0014	0.305146	E	Il7
GO:0006081	4	cellular aldehyde metabolic process	10	0.0007	1	0.0014	0.305146	E	Adh5
GO:0045017	5,6,7	glycerolipid biosynthetic process	10	0.0007	1	0.0014	0.305146	E	Ppap2a
GO:0032388	6,7,5,4	positive regulation of intracellular transport	10	0.0007	1	0.0014	0.305146	E	Uaca
GO:0006547	7,8	histidine metabolic process	10	0.0007	1	0.0014	0.305146	E	Dbh
GO:0044065	6,5	regulation of respiratory system process	10	0.0007	1	0.0014	0.305146	E	Nlgn2
GO:0032814	8,7,6	regulation of natural killer cell activation	10	0.0007	1	0.0014	0.305146	E	H60a
GO:0046504	5	glycerol ether biosynthetic process	10	0.0007	1	0.0014	0.305146	E	Ppap2a
GO:0009077	7,8	histidine family amino acid catabolic process	10	0.0007	1	0.0014	0.305146	E	Dbh
GO:0051173	6,4,5	positive regulation of nitrogen compound metabolic process	10	0.0007	1	0.0014	0.305146	E	H60a
GO:0002467	6	germinal center formation	10	0.0007	1	0.0014	0.305146	E	Nfkb2
GO:0032606	4	type I interferon production	10	0.0007	1	0.0014	0.305146	E	Myd88
GO:0045682	5,8,7,9,6,4	regulation of epidermis development	10	0.0007	1	0.0014	0.305146	E	Ngfr
GO:0002448	6,7	mast cell mediated immunity	10	0.0007	1	0.0014	0.305146	E	Cplx2
GO:0050714	6,7,9,8,4,5	positive regulation of protein secretion	10	0.0007	1	0.0014	0.305146	E	P2rx7
GO:0043303	7,8,6,5,9	mast cell degranulation	10	0.0007	1	0.0014	0.305146	E	Cplx2
GO:0009081	6,7	branched chain family amino acid metabolic process	10	0.0007	1	0.0014	0.305146	E	Auh
GO:0032816	9,8,7,6	positive regulation of natural killer cell activation	10	0.0007	1	0.0014	0.305146	E	H60a
GO:0046470	7,8	phosphatidylcholine metabolic process	10	0.0007	1	0.0014	0.305146	E	Chka
GO:0006518	4	peptide metabolic process	10	0.0007	1	0.0014	0.305146	E	Pam
GO:0019229	6,7,5,8	regulation of vasoconstriction	10	0.0007	1	0.0014	0.305146	E	Dbh
GO:0046579	9,10,8,7	positive regulation of Ras protein signal transduction	10	0.0007	1	0.0014	0.305146	E	Dock2
GO:0051445	6,5	regulation of meiotic cell cycle	10	0.0007	1	0.0014	0.305146	E	Fbxo5
GO:0002070	6,7,5,10,9,11,8	epithelial cell maturation	10	0.0007	1	0.0014	0.305146	E	Gja1
GO:0016579	9,10,8	protein deubiquitination	10	0.0007	1	0.0014	0.305146	E	Usp21
GO:0006878	10,8	cellular copper ion homeostasis	10	0.0007	1	0.0014	0.305146	E	Atp7a
GO:0002507	3	tolerance induction	10	0.0007	1	0.0014	0.305146	E	Irak3
GO:0009220	10	pyrimidine ribonucleotide biosynthetic process	10	0.0007	1	0.0014	0.305146	E	Nme4
GO:0002087	6,7,5	regulation of respiratory gaseous exchange by neurological system process	10	0.0007	1	0.0014	0.305146	E	Nlgn2
GO:0006548	8,9	histidine catabolic process	10	0.0007	1	0.0014	0.305146	E	Dbh
GO:0009218	9	pyrimidine ribonucleotide metabolic process	10	0.0007	1	0.0014	0.305146	E	Nme4
GO:0009075	6,7	histidine family amino acid metabolic process	10	0.0007	1	0.0014	0.305146	E	Dbh
GO:0007617	4,5	mating behavior	10	0.0007	1	0.0014	0.305146	E	Th
GO:0030279	6,8,7,9,4,5	negative regulation of ossification	10	0.0007	1	0.0014	0.305146	E	Enpp1
GO:0051208	11,6,9,5	sequestering of calcium ion	11	0.0008	1	0.0014	0.319873	E	P2rx7
GO:0043488	9,8,7	regulation of mRNA stability	11	0.0008	1	0.0014	0.319873	E	Mapkapk2
GO:0031645	6,7,4,5	negative regulation of neurological system process	11	0.0008	1	0.0014	0.319873	E	Slc24a2
GO:0045428	7,6,5	regulation of nitric oxide biosynthetic process	11	0.0008	1	0.0014	0.319873	E	H60a
GO:0046716	6,4	muscle maintenance	11	0.0008	1	0.0014	0.319873	E	Srf
GO:0050807	5,4,7,8	regulation of synapse organization	11	0.0008	1	0.0014	0.319873	E	Ncan
GO:0002292	8,10,11,9,7	T cell differentiation during immune response	11	0.0008	1	0.0014	0.319873	E	Atp7a
GO:0001578	6,5	microtubule bundle formation	11	0.0008	1	0.0014	0.319873	E	Psrc1
GO:0042116	6,5	macrophage activation	11	0.0008	1	0.0014	0.319873	E	H60a
GO:0055070	9	copper ion homeostasis	11	0.0008	1	0.0014	0.319873	E	Atp7a
GO:0031331	7,5,6	positive regulation of cellular catabolic process	11	0.0008	1	0.0014	0.319873	E	Gclc
GO:0031114	9,6,7,8,5	regulation of microtubule depolymerization	11	0.0008	1	0.0014	0.319873	E	Map6d1
GO:0051283	5,6,12,13,7,8,10,11,3,4	negative regulation of sequestering of calcium ion	11	0.0008	1	0.0014	0.319873	E	P2rx7
GO:0051057	8,9,7,6	positive regulation of small GTPase mediated signal transduction	11	0.0008	1	0.0014	0.319873	E	Dock2
GO:0051238	5,4	sequestering of metal ion	11	0.0008	1	0.0014	0.319873	E	P2rx7
GO:0008038	4	neuron recognition	11	0.0008	1	0.0014	0.319873	E	Nrp1
GO:0043409	9,10,8,7	negative regulation of MAPKKK cascade	11	0.0008	1	0.0014	0.319873	E	P2rx7
GO:0001963	7,8	synaptic transmission, dopaminergic	11	0.0008	1	0.0014	0.319873	E	Th
GO:0051282	5,12,6,7,10,4	regulation of sequestering of calcium ion	11	0.0008	1	0.0014	0.319873	E	P2rx7
GO:0030204	7,9,8,6	chondroitin sulfate metabolic process	11	0.0008	1	0.0014	0.319873	E	Chst11
GO:0002294	10,12,13,11,9	CD4-positive, alpha-beta T cell differentiation during immune response	11	0.0008	1	0.0014	0.319873	E	Atp7a
GO:0010165	6	response to X-ray	11	0.0008	1	0.0014	0.319873	E	Xrcc2
GO:0030865	5	cortical cytoskeleton organization	11	0.0008	1	0.0014	0.319873	E	Tln1
GO:0046887	6,7,8,5,4,9	positive regulation of hormone secretion	11	0.0008	1	0.0014	0.319873	E	Glud1
GO:0007026	9,7,8,10,5,6	negative regulation of microtubule depolymerization	11	0.0008	1	0.0014	0.319873	E	Map6d1
GO:0009119	7	ribonucleoside metabolic process	11	0.0008	1	0.0014	0.319873	E	Qtrtd1
GO:0051209	6,7,14,13,8,9,12,11,10,4,5	release of sequestered calcium ion into cytosol	11	0.0008	1	0.0014	0.319873	E	P2rx7
GO:0007257	12,11,14,10,13,9,8,7	activation of JUN kinase activity	11	0.0008	1	0.0014	0.319873	E	Map3k1
GO:0000097	7,8,6	sulfur amino acid biosynthetic process	11	0.0008	1	0.0014	0.319873	E	Mri1
GO:0021952	8,10,9,11,13,12,14	central nervous system projection neuron axonogenesis	11	0.0008	1	0.0014	0.319873	E	Dclk1
GO:0050663	7,5,6,8,4	cytokine secretion	11	0.0008	1	0.0014	0.319873	E	P2rx7
GO:0018298	9,8	protein-chromophore linkage	11	0.0008	1	0.0014	0.319873	E	Opn3
GO:0045132	9,7,8,6,4	meiotic chromosome segregation	11	0.0008	1	0.0014	0.319873	E	Espl1
GO:0002293	9,11,12,10,8	alpha-beta T cell differentiation during immune response	11	0.0008	1	0.0014	0.319873	E	Atp7a
GO:0042093	11,13,14,12,10	T-helper cell differentiation	11	0.0008	1	0.0014	0.319873	E	Atp7a
GO:0006910	7,4,6,8	phagocytosis, recognition	12	0.0008	1	0.0014	0.332539	E	Mfge8
GO:0051607	4,5,6	defense response to virus	12	0.0008	1	0.0014	0.332539	E	Abcc9
GO:0001952	6,7	regulation of cell-matrix adhesion	12	0.0008	1	0.0014	0.332539	E	Pik3cb
GO:0050806	8,9,6,7	positive regulation of synaptic transmission	12	0.0008	1	0.0014	0.332539	E	Slc24a2
GO:0005978	8,9	glycogen biosynthetic process	12	0.0008	1	0.0014	0.332539	E	Phkg2
GO:0021846	4,5,7,8,9	cell proliferation in forebrain	12	0.0008	1	0.0014	0.332539	E	Tacc3
GO:0031646	6,7,4,5	positive regulation of neurological system process	12	0.0008	1	0.0014	0.332539	E	Slc24a2
GO:0050892	5	intestinal absorption	12	0.0008	1	0.0014	0.332539	E	Vdr
GO:0050884	6	neuromuscular process controlling posture	12	0.0008	1	0.0014	0.332539	E	Scn1a
GO:0045669	7,9,6,5,8,10	positive regulation of osteoblast differentiation	12	0.0008	1	0.0014	0.332539	E	Gnas
GO:0031076	8,9,3,4,5	embryonic camera-type eye development	12	0.0008	1	0.0014	0.332539	E	Th
GO:0060048	7	cardiac muscle contraction	12	0.0008	1	0.0014	0.332539	E	Cacna1g
GO:0001101	4	response to acid	12	0.0008	1	0.0014	0.332539	E	Accn2
GO:0009409	5,4	response to cold	12	0.0008	1	0.0014	0.332539	E	P2rx3
GO:0051971	7,8,6,5	positive regulation of transmission of nerve impulse	12	0.0008	1	0.0014	0.332539	E	Slc24a2
GO:0060325	7,5,6,4	face morphogenesis	12	0.0008	1	0.0014	0.332539	E	Plekha1
GO:0070646	9,8	protein modification by small protein removal	12	0.0008	1	0.0014	0.332539	E	Usp21
GO:0008206	6,7	bile acid metabolic process	12	0.0008	1	0.0014	0.332539	E	Cyp39a1
GO:0042551	6,9,7,10,5	neuron maturation	12	0.0008	1	0.0014	0.332539	E	Farp2
GO:0048048	7,8,9,6	embryonic eye morphogenesis	12	0.0008	1	0.0014	0.332539	E	Th
GO:0031111	8,9,6,7	negative regulation of microtubule polymerization or depolymerization	12	0.0008	1	0.0014	0.332539	E	Map6d1
GO:0051145	6	smooth muscle cell differentiation	12	0.0008	1	0.0014	0.332539	E	Mkl2
GO:0046847	6	filopodium assembly	12	0.0008	1	0.0014	0.332539	E	Tgfb3
GO:0007340	4,6,5	acrosome reaction	12	0.0008	1	0.0014	0.332539	E	Syt6
GO:0009250	7,8	glucan biosynthetic process	12	0.0008	1	0.0014	0.332539	E	Phkg2
GO:0021697	4,6,7,8,9,10,11,12,13,5	cerebellar cortex formation	13	0.0009	1	0.0014	0.343304	E	Atp7a
GO:0006693	8,10,9	prostaglandin metabolic process	13	0.0009	1	0.0014	0.343304	E	Ptgs1
GO:0046466	6,7	membrane lipid catabolic process	13	0.0009	1	0.0014	0.343304	E	Gba2
GO:0050654	6,8,5,7	chondroitin sulfate proteoglycan metabolic process	13	0.0009	1	0.0014	0.343304	E	Chst11
GO:0048738	6,8,7,9	cardiac muscle tissue development	13	0.0009	1	0.0014	0.343304	E	Mkl2
GO:0030968	8,7,6	endoplasmic reticulum unfolded protein response	13	0.0009	1	0.0014	0.343304	E	Ppp1r15a
GO:0006405	9,8,5,7,6	RNA export from nucleus	13	0.0009	1	0.0014	0.343304	E	Gle1
GO:0048284	4	organelle fusion	13	0.0009	1	0.0014	0.343304	E	Vav3
GO:0043433	9,7,10,8	negative regulation of transcription factor activity	13	0.0009	1	0.0014	0.343304	E	Cebpg
GO:0030035	5	microspike assembly	13	0.0009	1	0.0014	0.343304	E	Tgfb3
GO:0042559	6	pteridine and derivative biosynthetic process	13	0.0009	1	0.0014	0.343304	E	Mocs2
GO:0051324	7,6,5	prophase	13	0.0009	1	0.0014	0.343304	E	Fbxo5
GO:0030010	6,7,4,8	establishment of cell polarity	13	0.0009	1	0.0014	0.343304	E	Dock2
GO:0010948	6,7,5,4	negative regulation of cell cycle process	13	0.0009	1	0.0014	0.343304	E	Cenpe
GO:0006626	5,8,7,6,9	protein targeting to mitochondrion	13	0.0009	1	0.0014	0.343304	E	Mtx2
GO:0006692	7,9,8	prostanoid metabolic process	13	0.0009	1	0.0014	0.343304	E	Ptgs1
GO:0009127	10	purine nucleoside monophosphate biosynthetic process	13	0.0009	1	0.0014	0.343304	E	Impdh2
GO:0001738	8,7,9,6	morphogenesis of a polarized epithelium	13	0.0009	1	0.0014	0.343304	E	Fzd3
GO:0030149	7,8	sphingolipid catabolic process	13	0.0009	1	0.0014	0.343304	E	Gba2
GO:0007128	10,8,7,9,6	meiotic prophase I	13	0.0009	1	0.0014	0.343304	E	Fbxo5
GO:0051262	7,6	protein tetramerization	13	0.0009	1	0.0014	0.343304	E	Ache
GO:0070585	7	protein localization in mitochondrion	13	0.0009	1	0.0014	0.343304	E	Mtx2
GO:0009168	11	purine ribonucleoside monophosphate biosynthetic process	13	0.0009	1	0.0014	0.343304	E	Impdh2
GO:0008272	7,8	sulfate transport	13	0.0009	1	0.0014	0.343304	E	Slc26a2
GO:0034620	5,6	cellular response to unfolded protein	13	0.0009	1	0.0014	0.343304	E	Ppp1r15a
GO:0042755	5	eating behavior	13	0.0009	1	0.0014	0.343304	E	Th
GO:0006760	5,7	folic acid and derivative metabolic process	13	0.0009	1	0.0014	0.343304	E	Folr1
GO:0018210	9,8	peptidyl-threonine modification	14	0.001	1	0.0014	0.352319	E	Acvr1b
GO:0050803	4,6,7	regulation of synapse structure and activity	14	0.001	1	0.0014	0.352319	E	Ncan
GO:0045954	7,11,12,8,10,9,5,6	positive regulation of natural killer cell mediated cytotoxicity	14	0.001	1	0.0014	0.352319	E	H60a
GO:0030168	7,4,5,6	platelet activation	14	0.001	1	0.0014	0.352319	E	Pik3cb
GO:0021533	5,7,8,9	cell differentiation in hindbrain	14	0.001	1	0.0014	0.352319	E	Atp7a
GO:0009886	5,4	post-embryonic morphogenesis	14	0.001	1	0.0014	0.352319	E	Gnas
GO:0019438	5	aromatic compound biosynthetic process	14	0.001	1	0.0014	0.352319	E	Mocs2
GO:0006635	7,8,9	fatty acid beta-oxidation	14	0.001	1	0.0014	0.352319	E	Hsd17b4
GO:0042177	7,8,5,6	negative regulation of protein catabolic process	14	0.001	1	0.0014	0.352319	E	Irak3
GO:0001975	7,6	response to amphetamine	14	0.001	1	0.0014	0.352319	E	Dbh
GO:0000209	10,11,9	protein polyubiquitination	14	0.001	1	0.0014	0.352319	E	Ube4a
GO:0043487	8,7,6	regulation of RNA stability	14	0.001	1	0.0014	0.352319	E	Mapkapk2
GO:0045076	8,7,6	regulation of interleukin-2 biosynthetic process	14	0.001	1	0.0014	0.352319	E	Cd1d1
GO:0043576	5,4	regulation of respiratory gaseous exchange	14	0.001	1	0.0014	0.352319	E	Nlgn2
GO:0051346	6	negative regulation of hydrolase activity	14	0.001	1	0.0014	0.352319	E	Nos1
GO:0002717	9,8,10,7,6	positive regulation of natural killer cell mediated immunity	14	0.001	1	0.0014	0.352319	E	H60a
GO:0010623	5,6,4	developmental programmed cell death	14	0.001	1	0.0014	0.352319	E	Vdr
GO:0002763	8,7,6,9,10,11	positive regulation of myeloid leukocyte differentiation	14	0.001	1	0.0014	0.352319	E	Gnas
GO:0019439	5	aromatic compound catabolic process	14	0.001	1	0.0014	0.352319	E	Aldh5a1
GO:0018107	10,8,9	peptidyl-threonine phosphorylation	14	0.001	1	0.0014	0.352319	E	Acvr1b
GO:0010970	7,5,6	microtubule-based transport	14	0.001	1	0.0014	0.352319	E	Nde1
GO:0021680	5,4,6,8,7,10,11,12	cerebellar Purkinje cell layer development	14	0.001	1	0.0014	0.352319	E	Atp7a
GO:0043507	11,10,13,9,12,8	positive regulation of JUN kinase activity	14	0.001	1	0.0014	0.352319	E	Map3k1
GO:0043270	6,7,5,4	positive regulation of ion transport	14	0.001	1	0.0014	0.352319	E	Sgk1
GO:0018149	9,8	peptide cross-linking	14	0.001	1	0.0014	0.352319	E	F13a1
GO:0060401	8,9	cytosolic calcium ion transport	14	0.001	1	0.0014	0.352319	E	P2rx7
GO:0031663	7,6	lipopolysaccharide-mediated signaling pathway	14	0.001	1	0.0014	0.352319	E	Myd88
GO:0030593	7,8,6,5,9	neutrophil chemotaxis	14	0.001	1	0.0014	0.352319	E	Itga1
GO:0001836	6,7	release of cytochrome c from mitochondria	14	0.001	1	0.0014	0.352319	E	Atp7a
GO:0001958	7,9,6,10,8,4	endochondral ossification	14	0.001	1	0.0014	0.352319	E	Gnas
GO:0045777	4,5,7	positive regulation of blood pressure	14	0.001	1	0.0014	0.352319	E	Adh5
GO:0030071	8,7,10,6,9,5	regulation of mitotic metaphase/anaphase transition	14	0.001	1	0.0014	0.352319	E	Cenpe
GO:0060402	13,11,9,10	calcium ion transport into cytosol	14	0.001	1	0.0014	0.352319	E	P2rx7
GO:0048010	9,8	vascular endothelial growth factor receptor signaling pathway	15	0.001	1	0.0014	0.359726	E	Nrp1
GO:0030500	6,8,7,9,5	regulation of bone mineralization	15	0.001	1	0.0014	0.359726	E	P2rx7
GO:0009410	4	response to xenobiotic stimulus	15	0.001	1	0.0014	0.359726	E	Gclc
GO:0006911	7,5,6,8	phagocytosis, engulfment	15	0.001	1	0.0014	0.359726	E	Mfge8
GO:0060442	8,6,9,10,7,5	branching involved in prostate gland morphogenesis	15	0.001	1	0.0014	0.359726	E	Frs2
GO:0009167	10	purine ribonucleoside monophosphate metabolic process	15	0.001	1	0.0014	0.359726	E	Impdh2
GO:0046928	8,6,7,9,5	regulation of neurotransmitter secretion	15	0.001	1	0.0014	0.359726	E	Chrna3
GO:0017148	8,9,6,7	negative regulation of translation	15	0.001	1	0.0014	0.359726	E	Paip2b
GO:0050850	8,9,10,7,6	positive regulation of calcium-mediated signaling	15	0.001	1	0.0014	0.359726	E	Ncam1
GO:0009743	5	response to carbohydrate stimulus	15	0.001	1	0.0014	0.359726	E	P2rx3
GO:0032655	6,5	regulation of interleukin-12 production	15	0.001	1	0.0014	0.359726	E	Irak3
GO:0045471	5	response to ethanol	15	0.001	1	0.0014	0.359726	E	Dbh
GO:0002027	7,4,6,8	regulation of heart rate	15	0.001	1	0.0014	0.359726	E	Cacna1g
GO:0032729	7,5,6	positive regulation of interferon-gamma production	15	0.001	1	0.0014	0.359726	E	H60a
GO:0021955	7,9,8,10,12,11,13	central nervous system neuron axonogenesis	15	0.001	1	0.0014	0.359726	E	Dclk1
GO:0030225	7,9,10,8	macrophage differentiation	15	0.001	1	0.0014	0.359726	E	Casp8
GO:0043299	7,5,6,4,8	leukocyte degranulation	15	0.001	1	0.0014	0.359726	E	Cplx2
GO:0050848	7,9,6,8	regulation of calcium-mediated signaling	15	0.001	1	0.0014	0.359726	E	Ncam1
GO:0050830	6,7	defense response to Gram-positive bacterium	15	0.001	1	0.0014	0.359726	E	P2rx7
GO:0060749	4,7,8	mammary gland alveolus development	15	0.001	1	0.0014	0.359726	E	Tph1
GO:0070167	5,7,8,6,4	regulation of biomineral formation	15	0.001	1	0.0014	0.359726	E	P2rx7
GO:0009126	9	purine nucleoside monophosphate metabolic process	15	0.001	1	0.0014	0.359726	E	Impdh2
GO:0060324	4,5	face development	16	0.0011	1	0.0014	0.365654	E	Plekha1
GO:0030032	5	lamellipodium assembly	16	0.0011	1	0.0014	0.365654	E	Vav3
GO:0043450	5	alkene biosynthetic process	16	0.0011	1	0.0014	0.365654	E	Alox15
GO:0060713	5,6,8,9,4,10	labyrinthine layer morphogenesis	16	0.0011	1	0.0014	0.365654	E	Esx1
GO:0001829	5,7,6,9,10	trophectodermal cell differentiation	16	0.0011	1	0.0014	0.365654	E	Srf
GO:0010553	11,10,12,9,8	negative regulation of specific transcription from RNA polymerase II promoter	16	0.0011	1	0.0014	0.365654	E	Zfp238
GO:0001523	8,9,6	retinoid metabolic process	16	0.0011	1	0.0014	0.365654	E	Adh5
GO:0021795	8,5,7,9,10,6,11,12	cerebral cortex cell migration	16	0.0011	1	0.0014	0.365654	E	Pex13
GO:0043392	6	negative regulation of DNA binding	16	0.0011	1	0.0014	0.365654	E	Cebpg
GO:0042573	7,5	retinoic acid metabolic process	16	0.0011	1	0.0014	0.365654	E	Rdh9
GO:0002286	7,6	T cell activation during immune response	16	0.0011	1	0.0014	0.365654	E	Atp7a
GO:0050764	6,7,8,5	regulation of phagocytosis	16	0.0011	1	0.0014	0.365654	E	Mfge8
GO:0030574	6,5	collagen catabolic process	16	0.0011	1	0.0014	0.365654	E	Mmp9
GO:0016101	7,8,5	diterpenoid metabolic process	16	0.0011	1	0.0014	0.365654	E	Adh5
GO:0007093	7,6	mitotic cell cycle checkpoint	16	0.0011	1	0.0014	0.365654	E	Cenpe
GO:0050766	7,8,9,5,6	positive regulation of phagocytosis	16	0.0011	1	0.0014	0.365654	E	Mfge8
GO:0045576	6,5	mast cell activation	16	0.0011	1	0.0014	0.365654	E	Cplx2
GO:0045666	7,9,8,10,6,5	positive regulation of neuron differentiation	16	0.0011	1	0.0014	0.365654	E	Tgif1
GO:0019370	6,9,8,10,7	leukotriene biosynthetic process	16	0.0011	1	0.0014	0.365654	E	Alox15
GO:0007040	5	lysosome organization	16	0.0011	1	0.0014	0.365654	E	Cln5
GO:0051588	6,5	regulation of neurotransmitter transport	16	0.0011	1	0.0014	0.365654	E	Chrna3
GO:0001759	6,7,9,8	induction of an organ	16	0.0011	1	0.0014	0.365654	E	Frs2
GO:0010092	5,7,8,6	specification of organ identity	16	0.0011	1	0.0014	0.365654	E	Frs2
GO:0007618	3,4	mating	16	0.0011	1	0.0014	0.365654	E	Th
GO:0046633	8,7	alpha-beta T cell proliferation	16	0.0011	1	0.0014	0.365654	E	Dock2
GO:0001659	5,3	temperature homeostasis	16	0.0011	1	0.0014	0.365654	E	Dbh
GO:0006691	5,7,9,8	leukotriene metabolic process	17	0.0012	1	0.0014	0.370227	E	Alox15
GO:0045055	6,4,5,7	regulated secretory pathway	17	0.0012	1	0.0014	0.370227	E	Cplx2
GO:0009262	8	deoxyribonucleotide metabolic process	17	0.0012	1	0.0014	0.370227	E	Rrm2
GO:0021696	5,6,7,8,9,10,11,12,4	cerebellar cortex morphogenesis	17	0.0012	1	0.0014	0.370227	E	Atp7a
GO:0009156	10	ribonucleoside monophosphate biosynthetic process	17	0.0012	1	0.0014	0.370227	E	Impdh2
GO:0006721	6,7,4	terpenoid metabolic process	17	0.0012	1	0.0014	0.370227	E	Adh5
GO:0032615	4	interleukin-12 production	17	0.0012	1	0.0014	0.370227	E	Irak3
GO:0006305	8,7	DNA alkylation	17	0.0012	1	0.0014	0.370227	E	Ctcf
GO:0006306	8,7,9	DNA methylation	17	0.0012	1	0.0014	0.370227	E	Ctcf
GO:0045732	7,8,5,6	positive regulation of protein catabolic process	17	0.0012	1	0.0014	0.370227	E	Gclc
GO:0051054	8,7,6,5	positive regulation of DNA metabolic process	17	0.0012	1	0.0014	0.370227	E	Cebpg
GO:0006595	7	polyamine metabolic process	17	0.0012	1	0.0014	0.370227	E	Sat1
GO:0051100	5	negative regulation of binding	17	0.0012	1	0.0014	0.370227	E	Cebpg
GO:0006801	5	superoxide metabolic process	17	0.0012	1	0.0014	0.370227	E	Atp7a
GO:0006898	6,5,7	receptor-mediated endocytosis	17	0.0012	1	0.0014	0.370227	E	Ache
GO:0051924	8,7,9	regulation of calcium ion transport	17	0.0012	1	0.0014	0.370227	E	Nos1
GO:0043506	10,9,12,8,11,7	regulation of JUN kinase activity	18	0.0012	1	0.0014	0.373558	E	Map3k1
GO:0031329	6,5	regulation of cellular catabolic process	18	0.0012	1	0.0014	0.373558	E	Gclc
GO:0030308	6,7,4,5	negative regulation of cell growth	18	0.0012	1	0.0014	0.373558	E	Psrc1
GO:0006304	7,6	DNA modification	18	0.0012	1	0.0014	0.373558	E	Ctcf
GO:0032582	10,9,11,8,7	negative regulation of gene-specific transcription	18	0.0012	1	0.0014	0.373558	E	Zfp238
GO:0007033	4	vacuole organization	18	0.0012	1	0.0014	0.373558	E	Cln5
GO:0022600	4	digestive system process	18	0.0012	1	0.0014	0.373558	E	Vdr
GO:0060350	6,8,9,5,7	endochondral bone morphogenesis	18	0.0012	1	0.0014	0.373558	E	Gnas
GO:0000096	6,7,5	sulfur amino acid metabolic process	18	0.0012	1	0.0014	0.373558	E	Mri1
GO:0031099	5,4	regeneration	18	0.0012	1	0.0014	0.373558	E	Gja1
GO:0042596	4,5	fear response	18	0.0012	1	0.0014	0.373558	E	Dbh
GO:0043367	9,11,12,10,8	CD4-positive, alpha beta T cell differentiation	18	0.0012	1	0.0014	0.373558	E	Atp7a
GO:0022029	7,6,8,9,10,5	telencephalon cell migration	18	0.0012	1	0.0014	0.373558	E	Pex13
GO:0048286	4,6,7,8	lung alveolus development	18	0.0012	1	0.0014	0.373558	E	Atp7a
GO:0006637	6,8,7	acyl-CoA metabolic process	18	0.0012	1	0.0014	0.373558	E	Scp2
GO:0008277	7,8,6	regulation of G-protein coupled receptor protein signaling pathway	18	0.0012	1	0.0014	0.373558	E	Tmod2
GO:0016525	5,6,7,8,9,10,11,4	negative regulation of angiogenesis	18	0.0012	1	0.0014	0.373558	E	Angpt2
GO:0048483	5,6	autonomic nervous system development	18	0.0012	1	0.0014	0.373558	E	Gata3
GO:0060079	10,7,8	regulation of excitatory postsynaptic membrane potential	19	0.0013	1	0.0014	0.375756	E	Chrna3
GO:0009895	6,4,5	negative regulation of catabolic process	19	0.0013	1	0.0014	0.375756	E	Irak3
GO:0002285	6,5	lymphocyte activation during immune response	19	0.0013	1	0.0014	0.375756	E	Atp7a
GO:0048610	3,4	reproductive cellular process	19	0.0013	1	0.0014	0.375756	E	Syt6
GO:0048535	6,7,5	lymph node development	19	0.0013	1	0.0014	0.375756	E	Nfkb2
GO:0010243	5,4	response to organic nitrogen	19	0.0013	1	0.0014	0.375756	E	Dbh
GO:0033692	6,7	cellular polysaccharide biosynthetic process	19	0.0013	1	0.0014	0.375756	E	Phkg2
GO:0006041	6	glucosamine metabolic process	19	0.0013	1	0.0014	0.375756	E	Renbp
GO:0048665	9,10,7,6,5	neuron fate specification	19	0.0013	1	0.0014	0.375756	E	Lbx1
GO:0009124	9	nucleoside monophosphate biosynthetic process	19	0.0013	1	0.0014	0.375756	E	Impdh2
GO:0043449	4	cellular alkene metabolic process	19	0.0013	1	0.0014	0.375756	E	Alox15
GO:0021885	6,5,7,8,9	forebrain cell migration	19	0.0013	1	0.0014	0.375756	E	Pex13
GO:0006044	7	N-acetylglucosamine metabolic process	19	0.0013	1	0.0014	0.375756	E	Renbp
GO:0009161	9	ribonucleoside monophosphate metabolic process	19	0.0013	1	0.0014	0.375756	E	Impdh2
GO:0050708	6,8,7,5	regulation of protein secretion	19	0.0013	1	0.0014	0.375756	E	P2rx7
GO:0042310	6,7	vasoconstriction	19	0.0013	1	0.0014	0.375756	E	Dbh
GO:0030890	10,9,8,7	positive regulation of B cell proliferation	19	0.0013	1	0.0014	0.375756	E	Il7
GO:0014075	6,5	response to amine stimulus	19	0.0013	1	0.0014	0.375756	E	Dbh
GO:0030512	8,10,11,7,6,9	negative regulation of transforming growth factor beta receptor signaling pathway	19	0.0013	1	0.0014	0.375756	E	Chst11
GO:0043029	8,5	T cell homeostasis	19	0.0013	1	0.0014	0.375756	E	P2rx7
GO:0042269	11,6,8,10,9,5,7	regulation of natural killer cell mediated cytotoxicity	19	0.0013	1	0.0014	0.375756	E	H60a
GO:0015914	5,6	phospholipid transport	19	0.0013	1	0.0014	0.375756	E	P2rx7
GO:0050728	7,8,5,6	negative regulation of inflammatory response	19	0.0013	1	0.0014	0.375756	E	Uaca
GO:0002064	5,6,9,8,10,7	epithelial cell development	19	0.0013	1	0.0014	0.375756	E	Gja1
GO:0007140	9,7,8,6	male meiosis	19	0.0013	1	0.0014	0.375756	E	Suv39h2
GO:0002715	9,7,8,6	regulation of natural killer cell mediated immunity	19	0.0013	1	0.0014	0.375756	E	H60a
GO:0007566	3,4,5	embryo implantation	19	0.0013	1	0.0014	0.375756	E	Mst1
GO:0032663	6,5	regulation of interleukin-2 production	19	0.0013	1	0.0014	0.375756	E	Cd1d1
GO:0060444	8,7,9,10,11,6	branching involved in mammary gland duct morphogenesis	20	0.0014	1	0.0014	0.376917	E	Vdr
GO:0001818	6,4,5	negative regulation of cytokine production	20	0.0014	1	0.0014	0.376917	E	Irak3
GO:0000271	5,6	polysaccharide biosynthetic process	20	0.0014	1	0.0014	0.376917	E	Phkg2
GO:0051693	10,11,9,8,12,7,6	actin filament capping	20	0.0014	1	0.0014	0.376917	E	Scin
GO:0010741	8,9,7,6	negative regulation of protein kinase cascade	20	0.0014	1	0.0014	0.376917	E	P2rx7
GO:0009988	4	cell-cell recognition	20	0.0014	1	0.0014	0.376917	E	Dock2
GO:0031346	6,4,5	positive regulation of cell projection organization	20	0.0014	1	0.0014	0.376917	E	Tgfb3
GO:0021587	5,6,7,8,9,10,11,4	cerebellum morphogenesis	20	0.0014	1	0.0014	0.376917	E	Atp7a
GO:0006752	6	group transfer coenzyme metabolic process	21	0.0014	1	0.0014	0.377136	E	Folr1
GO:0030318	6,5	melanocyte differentiation	21	0.0014	1	0.0014	0.377136	E	Mitf
GO:0048806	5,6	genitalia development	21	0.0014	1	0.0014	0.377136	E	Chd7
GO:0045787	6,4,5	positive regulation of cell cycle	21	0.0014	1	0.0014	0.377136	E	Cenpe
GO:0042462	10,7,11,8,9	eye photoreceptor cell development	21	0.0014	1	0.0014	0.377136	E	Th
GO:0051171	5,4	regulation of nitrogen compound metabolic process	21	0.0014	1	0.0014	0.377136	E	H60a
GO:0009116	6	nucleoside metabolic process	21	0.0014	1	0.0014	0.377136	E	Qtrtd1
GO:0006612	8,7,9	protein targeting to membrane	21	0.0014	1	0.0014	0.377136	E	Folr1
GO:0006984	7,6	ER-nuclear signaling pathway	21	0.0014	1	0.0014	0.377136	E	Ppp1r15a
GO:0050796	7,8,9,6,10	regulation of insulin secretion	21	0.0014	1	0.0014	0.377136	E	Glud1
GO:0034976	5	response to endoplasmic reticulum stress	21	0.0014	1	0.0014	0.377136	E	Ppp1r15a
GO:0030835	8,7,9,11,10,6,5	negative regulation of actin filament depolymerization	21	0.0014	1	0.0014	0.377136	E	Scin
GO:0001825	4,6,5,8,9	blastocyst formation	21	0.0014	1	0.0014	0.377136	E	Srf
GO:0045667	6,8,5,7,9	regulation of osteoblast differentiation	21	0.0014	1	0.0014	0.377136	E	Gnas
GO:0030199	5	collagen fibril organization	21	0.0014	1	0.0014	0.377136	E	Atp7a
GO:0008150	1	biological_process	14659	1	690	1	1	D	Man1c1,Aldh5a1,Cyp39a1,Cdca3,Rbm39,Ube2l3,Klhl13,Srd5a1,Fat3,Lphn1,Cnn2,Ncapg2,Kif18a,Etv1,Cdc25c,Pkia,Foxd1,Nfatc2ip,Fkbp14,Akr1e1,Ptgr1,Npy,Scin,Blvrb,Ap4m1,Tgif1,Tmem38b,Tbx20,Gba2,Rdh9,Nde1,Hsd17b4,Lin54,Cenph,Adh5,2210012G02Rik,Zadh2,Tpx2,Nsg1,Osgep,Rhob,Cln5,Cryz,Psrc1,Usp11,Rps12,Angpt2,Hectd2,Cpvl,Fuca2,Dhtkd1,Ctps,Txnrd1,Rhebl1,Rad1,Sv2b,Micalcl,Dclk1,Casp8,Rad54l,Nufip1,P2rx3,Hdac9,H2af…
GO:0060326	5,4,6,7	cell chemotaxis	22	0.0015	1	0.0014	0.376498	D	Itga1
GO:0002444	5,6	myeloid leukocyte mediated immunity	22	0.0015	1	0.0014	0.376498	D	Cplx2
GO:0045168	5,7,6	cell-cell signaling involved in cell fate specification	22	0.0015	1	0.0014	0.376498	D	Frs2
GO:0030595	6,7,5,4,8	leukocyte chemotaxis	22	0.0015	1	0.0014	0.376498	D	Itga1
GO:0006776	6	vitamin A metabolic process	22	0.0015	1	0.0014	0.376498	D	Rdh9
GO:0021766	6,7,4,8,9,5,10,11	hippocampus development	22	0.0015	1	0.0014	0.376498	D	Plxna3
GO:0030178	8,9,7,6	negative regulation of Wnt receptor signaling pathway	22	0.0015	1	0.0014	0.376498	D	Lrp1
GO:0031047	9,4,7,8	gene silencing by RNA	22	0.0015	1	0.0014	0.376498	D	Eif2c4
GO:0021695	4,5,7,6,9,10,11	cerebellar cortex development	22	0.0015	1	0.0014	0.376498	D	Atp7a
GO:0002053	7,5,6	positive regulation of mesenchymal cell proliferation	22	0.0015	1	0.0014	0.376498	D	Fbxw4
GO:0050931	5,4	pigment cell differentiation	22	0.0015	1	0.0014	0.376498	D	Mitf
GO:0031128	6,8,7	developmental induction	22	0.0015	1	0.0014	0.376498	D	Frs2
GO:0009123	8	nucleoside monophosphate metabolic process	22	0.0015	1	0.0014	0.376498	D	Impdh2
GO:0031032	6,5	actomyosin structure organization	22	0.0015	1	0.0014	0.376498	D	Cnn2
GO:0001541	7,8,6,9,5,4	ovarian follicle development	23	0.0016	1	0.0014	0.375083	D	Lfng
GO:0051168	8,7	nuclear export	23	0.0016	1	0.0014	0.375083	D	Gle1
GO:0060349	5,7,8,4,6	bone morphogenesis	23	0.0016	1	0.0014	0.375083	D	Gnas
GO:0030162	7,8,6	regulation of proteolysis	23	0.0016	1	0.0014	0.375083	D	Gclc
GO:0007595	7,8,5,4	lactation	23	0.0016	1	0.0014	0.375083	D	Vdr
GO:0045639	7,6,5,8,9,10	positive regulation of myeloid cell differentiation	23	0.0016	1	0.0014	0.375083	D	Gnas
GO:0045807	6,7,8,4,5	positive regulation of endocytosis	23	0.0016	1	0.0014	0.375083	D	Mfge8
GO:0050777	6,4,5	negative regulation of immune response	23	0.0016	1	0.0014	0.375083	D	Irak3
GO:0010463	4	mesenchymal cell proliferation	23	0.0016	1	0.0014	0.375083	D	Fbxw4
GO:0045786	6,4,5	negative regulation of cell cycle	23	0.0016	1	0.0014	0.375083	D	Cenpe
GO:0001755	6,7,8,10,11,9,5	neural crest cell migration	23	0.0016	1	0.0014	0.375083	D	Pax3
GO:0001754	9,10,7,8,6	eye photoreceptor cell differentiation	23	0.0016	1	0.0014	0.375083	D	Th
GO:0002366	5,4	leukocyte activation during immune response	23	0.0016	1	0.0014	0.375083	D	Atp7a
GO:0010464	6,5	regulation of mesenchymal cell proliferation	23	0.0016	1	0.0014	0.375083	D	Fbxw4
GO:0002263	4	cell activation during immune response	23	0.0016	1	0.0014	0.375083	D	Atp7a
GO:0021675	4,6	nerve development	24	0.0016	1	0.0014	0.372966	D	Ngfr
GO:0060078	9,6,7	regulation of postsynaptic membrane potential	24	0.0016	1	0.0014	0.372966	D	Chrna3
GO:0043112	4	receptor metabolic process	24	0.0016	1	0.0014	0.372966	D	Ache
GO:0007602	10,8,6,7,9	phototransduction	24	0.0016	1	0.0014	0.372966	D	Opn3
GO:0030042	8,6,7,5	actin filament depolymerization	24	0.0016	1	0.0014	0.372966	D	Scin
GO:0051656	5,3,4	establishment of organelle localization	24	0.0016	1	0.0014	0.372966	D	Slit1
GO:0043193	10,9,11,8,7	positive regulation of gene-specific transcription	24	0.0016	1	0.0014	0.372966	D	Psrc1
GO:0030834	10,6,9,8,7,5	regulation of actin filament depolymerization	24	0.0016	1	0.0014	0.372966	D	Scin
GO:0002791	7,6	regulation of peptide secretion	24	0.0016	1	0.0014	0.372966	D	Glud1
GO:0045792	5	negative regulation of cell size	24	0.0016	1	0.0014	0.372966	D	Psrc1
GO:0007492	6,7,5	endoderm development	24	0.0016	1	0.0014	0.372966	D	Angpt2
GO:0019722	8,7	calcium-mediated signaling	24	0.0016	1	0.0014	0.372966	D	Ncam1
GO:0045190	7,12,11,10,9,8,6	isotype switching	25	0.0017	1	0.0014	0.370216	D	Swap70
GO:0002204	11,10,9,8,7,6	somatic recombination of immunoglobulin genes during immune response	25	0.0017	1	0.0014	0.370216	D	Swap70
GO:0002208	8,9,7,10,6,5	somatic diversification of immunoglobulins during immune response	25	0.0017	1	0.0014	0.370216	D	Swap70
GO:0006879	10,8	cellular iron ion homeostasis	25	0.0017	1	0.0014	0.370216	D	Ttc7
GO:0009896	6,4,5	positive regulation of catabolic process	25	0.0017	1	0.0014	0.370216	D	Gclc
GO:0007530	4,5	sex determination	25	0.0017	1	0.0014	0.370216	D	Srd5a1
GO:0019835	4	cytolysis	25	0.0017	1	0.0014	0.370216	D	P2rx7
GO:0000956	9,8	nuclear-transcribed mRNA catabolic process	25	0.0017	1	0.0014	0.370216	D	Auh
GO:0010952	7	positive regulation of peptidase activity	25	0.0017	1	0.0014	0.370216	D	Uaca
GO:0051783	6,5	regulation of nuclear division	25	0.0017	1	0.0014	0.370216	D	Cenpe
GO:0007088	7,6,9,8,5	regulation of mitosis	25	0.0017	1	0.0014	0.370216	D	Cenpe
GO:0043280	9,8	positive regulation of caspase activity	25	0.0017	1	0.0014	0.370216	D	Uaca
GO:0022904	6,7,5	respiratory electron transport chain	25	0.0017	1	0.0014	0.370216	D	Aldh5a1
GO:0006040	5	amino sugar metabolic process	25	0.0017	1	0.0014	0.370216	D	Renbp
GO:0007163	5,6,3,7	establishment or maintenance of cell polarity	26	0.0018	1	0.0014	0.366897	D	Dock2
GO:0009110	5	vitamin biosynthetic process	26	0.0018	1	0.0014	0.366897	D	Rdh9
GO:0060603	7,9,8,10,6	mammary gland duct morphogenesis	26	0.0018	1	0.0014	0.366897	D	Vdr
GO:0009166	5,8	nucleotide catabolic process	26	0.0018	1	0.0014	0.366897	D	Entpd7
GO:0030837	9,10,8,11,7,6	negative regulation of actin filament polymerization	26	0.0018	1	0.0014	0.366897	D	Scin
GO:0042461	9,6,10,7	photoreceptor cell development	26	0.0018	1	0.0014	0.366897	D	Th
GO:0060740	7,8,9,6	prostate gland epithelium morphogenesis	27	0.0018	1	0.0014	0.363069	D	Frs2
GO:0006695	7,8,9	cholesterol biosynthetic process	27	0.0018	1	0.0014	0.363069	D	Nsdhl
GO:0032272	8,9,7,6,5	negative regulation of protein polymerization	27	0.0018	1	0.0014	0.363069	D	Scin
GO:0002381	8,6,9,7	immunoglobulin production during immune response	27	0.0018	1	0.0014	0.363069	D	Swap70
GO:0050908	9,7,6,8	detection of light stimulus involved in visual perception	27	0.0018	1	0.0014	0.363069	D	Opn3
GO:0050962	8,6,5,7	detection of light stimulus involved in sensory perception	27	0.0018	1	0.0014	0.363069	D	Opn3
GO:0031333	6,7,5,4	negative regulation of protein complex assembly	27	0.0018	1	0.0014	0.363069	D	Scin
GO:0007204	12,10	elevation of cytosolic calcium ion concentration	27	0.0018	1	0.0014	0.363069	D	P2rx7
GO:0009584	6,7	detection of visible light	27	0.0018	1	0.0014	0.363069	D	Opn3
GO:0008542	8,4,6,5,7	visual learning	27	0.0018	1	0.0014	0.363069	D	Dbh
GO:0006084	6	acetyl-CoA metabolic process	27	0.0018	1	0.0014	0.363069	D	Acss2
GO:0048645	4,6,7,5	organ formation	28	0.0019	1	0.0014	0.358786	D	Frs2
GO:0006944	4	membrane fusion	28	0.0019	1	0.0014	0.358786	D	Vav3
GO:0006953	7	acute-phase response	28	0.0019	1	0.0014	0.358786	D	Saal1
GO:0001658	7,9,8,6,10,5	branching involved in ureteric bud morphogenesis	28	0.0019	1	0.0014	0.358786	D	Foxd1
GO:0006338	7	chromatin remodeling	28	0.0019	1	0.0014	0.358786	D	Cebpg
GO:0009408	5,4	response to heat	28	0.0019	1	0.0014	0.358786	D	P2rx3
GO:0060512	6,7,8,5	prostate gland morphogenesis	28	0.0019	1	0.0014	0.358786	D	Frs2
GO:0046489	7,8,9	phosphoinositide biosynthetic process	28	0.0019	1	0.0014	0.358786	D	Pigl
GO:0030888	9,8,7	regulation of B cell proliferation	28	0.0019	1	0.0014	0.358786	D	Il7
GO:0006506	8,9,10	GPI anchor biosynthetic process	28	0.0019	1	0.0014	0.358786	D	Pigl
GO:0060675	5,8,9,4	ureteric bud morphogenesis	28	0.0019	1	0.0014	0.358786	D	Foxd1
GO:0007632	3,4,6	visual behavior	28	0.0019	1	0.0014	0.358786	D	Dbh
GO:0009583	5,6	detection of light stimulus	29	0.002	1	0.0014	0.3541	D	Opn3
GO:0001666	5,4	response to hypoxia	29	0.002	1	0.0014	0.3541	D	P2rx3
GO:0006775	5	fat-soluble vitamin metabolic process	29	0.002	1	0.0014	0.3541	D	Rdh9
GO:0030522	7,6	intracellular receptor-mediated signaling pathway	29	0.002	1	0.0014	0.3541	D	Tgif1
GO:0006914	5	autophagy	29	0.002	1	0.0014	0.3541	D	Atg10
GO:0006352	7,6,9,8	transcription initiation	29	0.002	1	0.0014	0.3541	D	Brf2
GO:0051480	11,9	cytosolic calcium ion homeostasis	29	0.002	1	0.0014	0.3541	D	P2rx7
GO:0070482	4	response to oxygen levels	30	0.002	1	0.0014	0.349059	D	P2rx3
GO:0030705	6,5	cytoskeleton-dependent intracellular transport	30	0.002	1	0.0014	0.349059	D	Nde1
GO:0008286	9,8,6,7	insulin receptor signaling pathway	30	0.002	1	0.0014	0.349059	D	Ptpn2
GO:0045665	7,9,8,10,6,5	negative regulation of neuron differentiation	30	0.002	1	0.0014	0.349059	D	Lbx1
GO:0006505	8,9	GPI anchor metabolic process	30	0.002	1	0.0014	0.349059	D	Pigl
GO:0046530	8,9,6	photoreceptor cell differentiation	30	0.002	1	0.0014	0.349059	D	Th
GO:0006839	6,5	mitochondrial transport	30	0.002	1	0.0014	0.349059	D	Mtx2
GO:0051260	7,6	protein homooligomerization	30	0.002	1	0.0014	0.349059	D	Cep57
GO:0021761	5,7,8,9	limbic system development	31	0.0021	1	0.0014	0.343707	D	Plxna3
GO:0021549	4,6,5,8,9,10	cerebellum development	31	0.0021	1	0.0014	0.343707	D	Atp7a
GO:0002062	5,7,8,6	chondrocyte differentiation	31	0.0021	1	0.0014	0.343707	D	Chst11
GO:0031400	8,9,6,7	negative regulation of protein modification process	31	0.0021	1	0.0014	0.343707	D	Gclc
GO:0055072	9	iron ion homeostasis	31	0.0021	1	0.0014	0.343707	D	Ttc7
GO:0002260	7,4	lymphocyte homeostasis	31	0.0021	1	0.0014	0.343707	D	P2rx7
GO:0016447	10,9,8,7,6,5	somatic recombination of immunoglobulin gene segments	31	0.0021	1	0.0014	0.343707	D	Swap70
GO:0046883	6,7,5,8	regulation of hormone secretion	31	0.0021	1	0.0014	0.343707	D	Glud1
GO:0048562	6,7,5	embryonic organ morphogenesis	31	0.0021	1	0.0014	0.343707	D	Th
GO:0048015	8,7	phosphoinositide-mediated signaling	32	0.0022	1	0.0014	0.338083	D	Pik3cb
GO:0032102	6,4,5	negative regulation of response to external stimulus	32	0.0022	1	0.0014	0.338083	D	Uaca
GO:0030111	7,8,6	regulation of Wnt receptor signaling pathway	32	0.0022	1	0.0014	0.338083	D	Lrp1
GO:0019748	3	secondary metabolic process	32	0.0022	1	0.0014	0.338083	D	Adh5
GO:0016445	7,6,5,4	somatic diversification of immunoglobulins	33	0.0023	1	0.0014	0.332225	D	Swap70
GO:0014032	6,7,9,10,8	neural crest cell development	33	0.0023	1	0.0014	0.332225	D	Pax3
GO:0048193	6,4,5	Golgi vesicle transport	33	0.0023	1	0.0014	0.332225	D	Gabarapl2
GO:0050871	9,8,7,6	positive regulation of B cell activation	33	0.0023	1	0.0014	0.332225	D	Il7
GO:0006720	5,6	isoprenoid metabolic process	33	0.0023	1	0.0014	0.332225	D	Adh5
GO:0014033	6,8,9,7	neural crest cell differentiation	33	0.0023	1	0.0014	0.332225	D	Pax3
GO:0042446	6,4	hormone biosynthetic process	33	0.0023	1	0.0014	0.332225	D	Srd5a1
GO:0045765	5,6,7,8,9,10,4	regulation of angiogenesis	34	0.0023	1	0.0014	0.326167	D	Angpt2
GO:0032147	12,9,11	activation of protein kinase activity	35	0.0024	1	0.0014	0.319943	D	Chrna3
GO:0008584	6,7,8	male gonad development	35	0.0024	1	0.0014	0.319943	D	Hsd17b4
GO:0016444	8,7	somatic cell DNA recombination	35	0.0024	1	0.0014	0.319943	D	Swap70
GO:0045926	5,3,4	negative regulation of growth	35	0.0024	1	0.0014	0.319943	D	Psrc1
GO:0002562	9,8,7,5,4	somatic diversification of immune receptors via germline recombination within a single locus	35	0.0024	1	0.0014	0.319943	D	Swap70
GO:0050769	8,7,6,9	positive regulation of neurogenesis	35	0.0024	1	0.0014	0.319943	D	Xrcc2
GO:0005977	7,8	glycogen metabolic process	36	0.0025	1	0.0014	0.313579	D	Phkg2
GO:0060443	6,7,8,5	mammary gland morphogenesis	36	0.0025	1	0.0014	0.313579	D	Vdr
GO:0022037	5,4,7,8,9	metencephalon development	36	0.0025	1	0.0014	0.313579	D	Atp7a
GO:0006073	6,7	cellular glucan metabolic process	36	0.0025	1	0.0014	0.313579	D	Phkg2
GO:0044042	6	glucan metabolic process	36	0.0025	1	0.0014	0.313579	D	Phkg2
GO:0030850	6,5,7	prostate gland development	36	0.0025	1	0.0014	0.313579	D	Frs2
GO:0030509	9,8	BMP signaling pathway	36	0.0025	1	0.0014	0.313579	D	Bmpr2
GO:0019228	10,6,8	regulation of action potential in neuron	37	0.0025	1	0.0014	0.307104	D	Scn1a
GO:0022602	6,5,4,3	ovulation cycle process	37	0.0025	1	0.0014	0.307104	D	Lfng
GO:0002200	6,4,3	somatic diversification of immune receptors	37	0.0025	1	0.0014	0.307104	D	Swap70
GO:0006639	6,5,7	acylglycerol metabolic process	37	0.0025	1	0.0014	0.307104	D	Ppap2a
GO:0042593	7	glucose homeostasis	38	0.0026	1	0.0014	0.300542	D	Dbh
GO:0033500	6	carbohydrate homeostasis	38	0.0026	1	0.0014	0.300542	D	Dbh
GO:0031668	4,5	cellular response to extracellular stimulus	38	0.0026	1	0.0014	0.300542	D	P2rx7
GO:0042698	5,4,3	ovulation cycle	38	0.0026	1	0.0014	0.300542	D	Lfng
GO:0017015	7,10,6,9	regulation of transforming growth factor beta receptor signaling pathway	38	0.0026	1	0.0014	0.300542	D	Chst11
GO:0052548	7	regulation of endopeptidase activity	38	0.0026	1	0.0014	0.300542	D	Uaca
GO:0010810	5,6	regulation of cell-substrate adhesion	38	0.0026	1	0.0014	0.300542	D	Pik3cb
GO:0043281	8,7	regulation of caspase activity	38	0.0026	1	0.0014	0.300542	D	Uaca
GO:0046486	5,6	glycerolipid metabolic process	38	0.0026	1	0.0014	0.300542	D	Ppap2a
GO:0042100	7,6	B cell proliferation	38	0.0026	1	0.0014	0.300542	D	Il7
GO:0034220	4,5,6	ion transmembrane transport	38	0.0026	1	0.0014	0.300542	D	Atp7a
GO:0006638	5,6	neutral lipid metabolic process	39	0.0027	1	0.0014	0.293916	D	Ppap2a
GO:0052547	6	regulation of peptidase activity	39	0.0027	1	0.0014	0.293916	D	Uaca
GO:0050885	6	neuromuscular process controlling balance	39	0.0027	1	0.0014	0.293916	D	Nbn
GO:0006662	4	glycerol ether metabolic process	39	0.0027	1	0.0014	0.293916	D	Ppap2a
GO:0010720	7,5,6	positive regulation of cell development	40	0.0027	1	0.0014	0.287245	D	Xrcc2
GO:0045785	4,5,6	positive regulation of cell adhesion	40	0.0027	1	0.0014	0.287245	D	Vav3
GO:0008585	6,7,8	female gonad development	41	0.0028	1	0.0014	0.28055	D	Lfng
GO:0001657	7,8,4	ureteric bud development	41	0.0028	1	0.0014	0.28055	D	Foxd1
GO:0032869	5,6,7	cellular response to insulin stimulus	43	0.0029	2	0.0029	0.277528	D	Sgk1,Ptpn2
GO:0043524	9,8,7,6	negative regulation of neuron apoptosis	43	0.0029	2	0.0029	0.277528	D	Xrcc2,Tgfb3
GO:0007338	5,4	single fertilization	44	0.003	2	0.0029	0.277058	D	Syt6,Mfge8
GO:0046545	5,6,7	development of primary female sexual characteristics	44	0.003	2	0.0029	0.277058	D	Lfng,Chd7
GO:0030833	9,8,7,10,6	regulation of actin filament polymerization	44	0.003	2	0.0029	0.277058	D	Scin,Map3k1
GO:0006096	9,10,5	glycolysis	44	0.003	2	0.0029	0.277058	D	Dhtkd1,Uevld
GO:0009266	4	response to temperature stimulus	45	0.0031	2	0.0029	0.276296	D	P2rx3,Ngfr
GO:0001508	9,7	regulation of action potential	45	0.0031	2	0.0029	0.276296	D	Scn1a,Chrnb4
GO:0048663	8,9,6,5	neuron fate commitment	46	0.0031	2	0.0029	0.275256	D	Pax3,Lbx1
GO:0007050	5,4	cell cycle arrest	46	0.0031	2	0.0029	0.275256	D	Sesn3,Ppm1g
GO:0007188	9,10,8	G-protein signaling, coupled to cAMP nucleotide second messenger	46	0.0031	2	0.0029	0.275256	D	Gnas,Tshr
GO:0021510	4,6,7	spinal cord development	47	0.0032	2	0.0029	0.273954	D	Pax3,Lbx1
GO:0007631	4	feeding behavior	47	0.0032	2	0.0029	0.273954	D	Th,Pex13
GO:0040029	7,6	regulation of gene expression, epigenetic	47	0.0032	2	0.0029	0.273954	D	Eed,Ctcf
GO:0045637	6,5,8,9,7,4	regulation of myeloid cell differentiation	47	0.0032	2	0.0029	0.273954	D	Gnas,Mitf
GO:0003018	5	vascular process in circulatory system	42	0.0029	1	0.0014	0.273847	D	Dbh
GO:0050880	5,6	regulation of blood vessel size	42	0.0029	1	0.0014	0.273847	D	Dbh
GO:0035150	4	regulation of tube size	42	0.0029	1	0.0014	0.273847	D	Dbh
GO:0048593	7,8,9,6	camera-type eye morphogenesis	48	0.0033	2	0.0029	0.272405	D	Th,Frs2
GO:0008064	9,8,7,6,5	regulation of actin polymerization or depolymerization	48	0.0033	2	0.0029	0.272405	D	Scin,Map3k1
GO:0050909	8	sensory perception of taste	48	0.0033	2	0.0029	0.272405	D	P2rx3,Tas2r135
GO:0007187	8,9,7	G-protein signaling, coupled to cyclic nucleotide second messenger	49	0.0033	2	0.0029	0.270624	D	Gnas,Tshr
GO:0001558	5,6,4	regulation of cell growth	49	0.0033	2	0.0029	0.270624	D	Psrc1,Igfbp5
GO:0030832	8,7,5,6	regulation of actin filament length	49	0.0033	2	0.0029	0.270624	D	Scin,Map3k1
GO:0030041	8,7,6,5	actin filament polymerization	50	0.0034	2	0.0029	0.268625	D	Scin,Map3k1
GO:0001776	6,3	leukocyte homeostasis	43	0.0029	1	0.0014	0.267152	D	P2rx7
GO:0019216	6,5	regulation of lipid metabolic process	43	0.0029	1	0.0014	0.267152	D	Vav3
GO:0042475	7,8,6	odontogenesis of dentine-containing tooth	43	0.0029	1	0.0014	0.267152	D	Ngfr
GO:0016458	8,3,6,7	gene silencing	43	0.0029	1	0.0014	0.267152	D	Eif2c4
GO:0046660	4,5,6	female sex differentiation	51	0.0035	2	0.0029	0.266422	D	Lfng,Chd7
GO:0002757	8,7,6,4	immune response-activating signal transduction	51	0.0035	2	0.0029	0.266422	D	Myd88,Irak3
GO:0007292	5,4	female gamete generation	52	0.0035	2	0.0029	0.264029	D	Fbxo5,Cdc25b
GO:0006007	8,9	glucose catabolic process	52	0.0035	2	0.0029	0.264029	D	Dhtkd1,Uevld
GO:0032868	6	response to insulin stimulus	52	0.0035	2	0.0029	0.264029	D	Sgk1,Ptpn2
GO:0032535	4	regulation of cellular component size	52	0.0035	2	0.0029	0.264029	D	Scin,Map3k1
GO:0019933	9,8	cAMP-mediated signaling	52	0.0035	2	0.0029	0.264029	D	Gnas,Tshr
GO:0019320	7,8	hexose catabolic process	52	0.0035	2	0.0029	0.264029	D	Dhtkd1,Uevld
GO:0046365	6,7	monosaccharide catabolic process	52	0.0035	2	0.0029	0.264029	D	Dhtkd1,Uevld
GO:0009582	4	detection of abiotic stimulus	53	0.0036	2	0.0029	0.26146	D	Opn3,Ngfr
GO:0044264	5,6	cellular polysaccharide metabolic process	44	0.003	1	0.0014	0.260478	D	Phkg2
GO:0007160	5	cell-matrix adhesion	54	0.0037	2	0.0029	0.258727	D	Dlc1,Pik3cb
GO:0048730	7,6,8,9,5	epidermis morphogenesis	54	0.0037	2	0.0029	0.258727	D	Atp7a,Ngfr
GO:0002764	6,5	immune response-regulating signal transduction	55	0.0038	2	0.0029	0.255842	D	Myd88,Irak3
GO:0019935	8,7	cyclic-nucleotide-mediated signaling	55	0.0038	2	0.0029	0.255842	D	Gnas,Tshr
GO:0008154	5,7,6,4	actin polymerization or depolymerization	55	0.0038	2	0.0029	0.255842	D	Scin,Map3k1
GO:0002819	6,5	regulation of adaptive immune response	55	0.0038	2	0.0029	0.255842	D	P2rx7,Cd1d1
GO:0001656	6,7	metanephros development	55	0.0038	2	0.0029	0.255842	D	Foxd1,Slit2
GO:0032956	7,6,5	regulation of actin cytoskeleton organization	55	0.0038	2	0.0029	0.255842	D	Scin,Map3k1
[truncated: 297 more rows]

## Sheet: Genes shared by Dali and Pou3f3
				DALI KD 0.1 FDR							Pou3f3 0.1 FDR
ID	Symbol	Name	Ensembl	logFC	AveExpr	t	P.Value	adj.P.Val	B		logFC	AveExpr	t	P.Value	adj.P.Val	B
10469138	4930412O13Rik	RIKEN cDNA 4930412O13 gene	NA	-0.668285	9.38829	-3.77587	0.000600643	0.056514	-0.303542		-1.00746	9.20149	-10.1525	5.64743e-08	0.000179626	8.39231
10495945	4930422G04Rik	RIKEN cDNA 4930422G04 gene	ENSMUSG00000051278	0.643462	8.62255	4.25304	0.000151642	0.0269946	0.936583		0.334003	8.60088	3.52125	0.0032336	0.0759912	-1.76538
10416736	6720463M24Rik	RIKEN cDNA 6720463M24 gene	ENSMUSG00000022070	0.58531	9.46371	3.81011	0.000544994	0.0546231	-0.216191		0.421546	9.63898	4.58895	0.000386555	0.0271506	0.266323
10526559	Ache	acetylcholinesterase	ENSMUSG00000023328	-0.74576	10.8043	-4.33698	0.000118532	0.0243747	1.1591		-0.490885	11.3884	-5.50465	6.85538e-05	0.0103745	1.9194
10374083	Aebp1	AE binding protein 1	ENSMUSG00000020473	-0.798517	10.4272	-4.61172	5.25758e-05	0.0173869	1.89406		-0.464832	10.7428	-5.5472	6.3426e-05	0.00992149	1.99339
10504730	Anp32b	acidic (leucine-rich) nuclear phosphoprotein 32 family, member B	ENSMUSG00000028333	0.767205	11.2801	4.96704	1.81628e-05	0.00836624	2.85558		0.692833	11.6714	6.50406	1.17875e-05	0.00466689	3.58384
10389395	Brip1	BRCA1 interacting protein C-terminal helicase 1	ENSMUSG00000034329	0.567518	9.44857	3.57108	0.00106781	0.0695935	-0.819425		0.396683	9.66609	3.77389	0.00194332	0.0589494	-1.27989
10413803	Btd	biotinidase	ENSMUSG00000021900	-0.515449	8.54131	-3.45765	0.00146152	0.0788223	-1.09995		-0.440464	8.48288	-4.49039	0.000468421	0.0291923	0.0822506
10474769	Bub1b	budding uninhibited by benzimidazoles 1 homolog, beta (S. cerevisiae)	ENSMUSG00000040084	0.532555	10.8827	3.30715	0.00220357	0.0944974	-1.46578		0.333678	11.0806	3.91276	0.00147061	0.0507506	-1.0135
10472916	Cdca7	cell division cycle associated 7	ENSMUSG00000055612	0.649603	10.0937	4.17147	0.000192451	0.0310185	0.72144		0.607027	10.4621	4.66787	0.000331691	0.025119	0.412977
10496204	Cenpe	centromere protein E	ENSMUSG00000045328	0.585611	10.0082	3.42859	0.00158299	0.0824467	-1.17119		0.541308	10.4017	3.39878	0.00414119	0.0853839	-2.00052
10592201	Chek1	checkpoint kinase 1 homolog (S. pombe)	ENSMUSG00000032113	0.644478	10.0868	3.7095	0.000724588	0.0591928	-0.471957		0.43831	10.8104	4.56831	0.000402391	0.0274179	0.227851
10345571	Cnga3	cyclic nucleotide gated channel alpha 3	ENSMUSG00000026114	-0.617032	9.04515	-4.06442	0.000262663	0.0382047	0.440883		-0.511871	8.78643	-5.338	9.31717e-05	0.012389	1.62707
10488982	Cpne1	copine I	ENSMUSG00000074643	0.613035	10.2135	3.80348	0.000555362	0.0551984	-0.233126		0.731401	10.7091	8.17625	8.37238e-07	0.000887659	6.02159
10409876	Ctla2a	cytotoxic T lymphocyte-associated protein 2 alpha	ENSMUSG00000044258	-0.760363	10.1158	-4.03077	0.000289515	0.0396716	0.353145		-0.344334	10.4048	-3.40377	0.00409962	0.0849924	-1.99094
10499545	Efna3	ephrin A3	ENSMUSG00000028039	-0.788831	8.60847	-3.8687	0.000461202	0.050933	-0.0661009		-0.526031	9.20613	-4.75396	0.00028091	0.0232073	0.572137
10368289	Enpp1	ectonucleotide pyrophosphatase/phosphodiesterase 1	ENSMUSG00000037370	-0.640132	12.148	-3.9303	0.000386638	0.0470401	0.0925815		-0.406244	12.2828	-4.61367	0.000368431	0.0267343	0.312335
10427166	Espl1	extra spindle poles-like 1 (S. cerevisiae)	ENSMUSG00000058290	0.554372	10.3833	3.48177	0.0013676	0.0776732	-1.04065		0.347321	10.6261	3.2415	0.00568999	0.0980703	-2.30162
10349932	Etnk2	ethanolamine kinase 2	ENSMUSG00000070644	-0.760404	7.48423	-3.76826	0.000613722	0.056514	-0.32289		-0.354422	7.62919	-3.90713	0.0014873	0.0511416	-1.02429
10432492	Faim2	Fas apoptotic inhibitory molecule 2	ENSMUSG00000023011	-0.8459	10.9177	-4.96567	1.82378e-05	0.00836624	2.85186		-0.579412	11.5807	-5.86402	3.58272e-05	0.00727368	2.53573
10582180	Fam92b	family with sequence similarity 92, member B	ENSMUSG00000042269	-0.861471	7.78562	-4.50897	7.13338e-05	0.0193363	1.61812		-0.848708	7.97779	-8.68965	3.98756e-07	0.000602839	6.6871
10361375	Fbxo5	F-box protein 5	ENSMUSG00000019773	0.616091	10.6667	3.85057	0.000485688	0.0525255	-0.112623		0.425781	11.2305	4.05146	0.00111459	0.0432334	-0.748263
10544885	Fkbp14	FK506 binding protein 14	ENSMUSG00000038074	-1.53881	8.39797	-7.43993	1.114e-08	4.44479e-05	9.48033		-0.457283	9.0093	-5.27014	0.000105684	0.0130965	1.50687
10562192	Fxyd5	FXYD domain-containing ion transport regulator 5	ENSMUSG00000009687	-0.599596	9.73305	-3.60338	0.000975874	0.0663012	-0.738832		-0.701721	11.256	-7.71043	1.68679e-06	0.00146321	5.38509
10582403	Galns	galactosamine (N-acetyl)-6-sulfate sulfatase	ENSMUSG00000015027	-0.545866	10.8361	-3.57797	0.00104751	0.0690255	-0.802246		-0.364713	11.3185	-3.73747	0.00209101	0.0610166	-1.34983
10472181	Galnt5	UDP-N-acetyl-alpha-D-galactosamine:polypeptide N-acetylgalactosaminyltransferase 5	ENSMUSG00000026828	-0.562573	6.8938	-3.66852	0.000813156	0.061774	-0.575388		-1.17936	8.14993	-11.3627	1.31106e-08	9.3948e-05	9.61303
10476989	Gins1	GINS complex subunit 1 (Psf1 homolog)	ENSMUSG00000027454	0.711368	9.46971	4.26332	0.000147145	0.0269946	0.963772		0.527897	9.78277	3.42308	0.00394277	0.0837916	-1.9539
10535732	Gpr12	G-protein coupled receptor 12	ENSMUSG00000041468	-0.582451	8.21547	-3.65104	0.000854034	0.0628769	-0.619356		-0.410236	8.79086	-4.78327	0.000265511	0.0226206	0.626124
10537712	Gstk1	glutathione S-transferase kappa 1	ENSMUSG00000029864	-0.516786	9.30912	-3.45928	0.00145498	0.0788223	-1.09595		0.365988	10.5197	3.56114	0.00298339	0.0728456	-1.68871
10608655	H60a	histocompatibility 60a	NA	-0.678162	10.8244	-4.01047	0.000306992	0.0411403	0.300326		-0.277486	11.9846	-3.32408	0.00481581	0.0906521	-2.14368
10364478	Hcn2	hyperpolarization-activated, cyclic nucleotide-gated K+ 2	ENSMUSG00000020331	0.514043	10.1766	3.28037	0.00236883	0.0997113	-1.53006		0.370512	10.8395	3.50714	0.00332703	0.076868	-1.79248
10369704	Hnrnph3	heterogeneous nuclear ribonucleoprotein H3	ENSMUSG00000020069	0.511508	10.5187	3.38178	0.00179921	0.084908	-1.28533		0.448492	10.9503	4.98999	0.000178918	0.0183574	1.00388
10355500	Igfbp5	insulin-like growth factor binding protein 5	ENSMUSG00000026185	-1.1168	9.62109	-7.4387	1.118e-08	4.44479e-05	9.47718		-0.504766	9.49516	-5.8469	3.69369e-05	0.00734119	2.50682
10599174	Il13ra1	interleukin 13 receptor, alpha 1	ENSMUSG00000017057	-0.72293	9.10423	-3.48792	0.0013446	0.0775803	-1.0255		-0.914902	9.93708	-7.33817	3.01099e-06	0.00185361	4.85321
10465861	Incenp	inner centromere protein	ENSMUSG00000024660	0.526628	10.3403	3.30855	0.00219528	0.0944974	-1.46242		0.430479	10.5812	4.91589	0.000205989	0.0196554	0.869098
10412267	Itga2	integrin alpha 2	ENSMUSG00000015533	-0.972959	10.1402	-5.16143	1.01168e-05	0.00635068	3.38479		-0.428439	10.2323	-4.55814	0.000410436	0.0275802	0.208883
10492402	Kcnab1	potassium voltage-gated channel, shaker-related subfamily, beta member 1	ENSMUSG00000027827	0.507647	10.8169	3.40538	0.00168689	0.0832099	-1.22788		0.39126	10.833	4.09177	0.00102859	0.0415526	-0.671383
10493555	Kcnn3	potassium intermediate/small conductance calcium-activated channel, subfamily N, member 3	ENSMUSG00000000794	-0.593683	10.4349	-3.48793	0.00134455	0.0775803	-1.02547		-0.657956	10.5105	-7.88375	1.2957e-06	0.00117748	5.62564
10462796	Kif11	kinesin family member 11	ENSMUSG00000012443	0.696404	11.6321	4.32302	0.000123501	0.0245499	1.122		0.337211	12.058	3.62126	0.00264262	0.0691795	-1.57316
10590494	Kif15	kinesin family member 15	ENSMUSG00000036768	0.707354	9.96199	4.395	9.99149e-05	0.0238337	1.3135		0.479382	9.95711	3.43465	0.00385166	0.0833079	-1.93169
10515431	Kif2c	kinesin family member 2C	ENSMUSG00000028678	0.668942	10.526	4.14862	0.000205699	0.0319816	0.66137		0.459647	10.453	4.96787	0.000186591	0.0187264	0.963718
10525591	Kntc1	kinetochore associated 1	ENSMUSG00000029414	0.724295	9.4554	4.59162	5.58152e-05	0.0175186	1.83998		0.321586	9.66623	3.51331	0.00328582	0.0765649	-1.78062
10593449	Layn	layilin	ENSMUSG00000060594	-0.6271	9.52613	-3.30467	0.00221843	0.0944974	-1.47175		-0.567508	9.2543	-6.31439	1.62903e-05	0.00516515	3.27995
10462912	Lgi1	leucine-rich repeat LGI family, member 1	ENSMUSG00000067242	-0.583987	11.1471	-3.38093	0.00180339	0.084908	-1.2874		-0.574132	12.0527	-5.92575	3.21051e-05	0.00713069	2.63961
10502770	Lphn2	latrophilin 2	ENSMUSG00000028184	0.585395	9.40464	3.53496	0.0011805	0.0733325	-0.909173		0.333734	8.98693	3.60155	0.00274977	0.0707367	-1.61104
10394488	Matn3	matrilin 3	ENSMUSG00000020583	0.503428	8.18252	3.39205	0.00174945	0.084908	-1.26034		0.370878	9.08858	3.96311	0.00132965	0.0479113	-0.917116
10504470	Melk	maternal embryonic leucine zipper kinase	ENSMUSG00000035683	0.55783	9.47758	3.44032	0.00153282	0.0808937	-1.14246		0.623326	9.71132	6.63361	9.47718e-06	0.00401917	3.78815
10571680	Mlf1ip	myeloid leukemia factor 1 interacting protein	ENSMUSG00000031629	0.523237	9.93148	3.41168	0.00165802	0.0832099	-1.21249		0.498461	10.5492	4.88497	0.000218506	0.0203413	0.812644
10569542	Mrgpre	MAS-related GPR, member E	ENSMUSG00000048965	-0.608288	8.60979	-4.05025	0.000273658	0.0388562	0.403915		-0.495357	9.32948	-4.89852	0.000212929	0.0199193	0.83739
10578690	Neil3	nei like 3 (E. coli)	ENSMUSG00000039396	0.582687	10.4912	3.67717	0.000793632	0.0614653	-0.553597		0.585394	10.8038	6.41232	1.37757e-05	0.00486843	3.43756
10352767	Nek2	NIMA (never in mitosis gene a)-related expressed kinase 2	ENSMUSG00000026622	0.530102	10.9823	3.35235	0.00194938	0.0899811	-1.35673		0.313572	10.9331	3.58886	0.00282112	0.0717843	-1.63545
10391963	Nsf	N-ethylmaleimide sensitive fusion protein	ENSMUSG00000034187	0.548783	10.9499	3.63776	0.000886434	0.0633084	-0.652726		0.383714	11.1617	4.6	0.00037834	0.0270283	0.286905
10500808	Olfml3	olfactomedin-like 3	ENSMUSG00000027848	-0.58056	11.5747	-3.47104	0.00140863	0.0784383	-1.06705		-0.717914	12.118	-6.75386	7.75598e-06	0.00352417	3.97541
10357858	Optc	opticin	ENSMUSG00000010311	-0.650438	9.17819	-4.30137	0.000131609	0.0253178	1.06455		-0.460706	9.17746	-5.41546	8.07515e-05	0.0115797	1.76345
10484488	P2rx3	purinergic receptor P2X, ligand-gated ion channel, 3	ENSMUSG00000027071	-0.771975	11.7202	-4.99329	1.67846e-05	0.00834124	2.92696		-0.677628	11.8771	-6.79782	7.21153e-06	0.00344062	4.04331
10398907	Pld4	phospholipase D family, member 4	ENSMUSG00000052160	-0.776803	7.99213	-5.19637	9.10515e-06	0.00635068	3.48004		-0.541266	8.47216	-5.10083	0.000145102	0.0160065	1.20416
10435581	Polq	polymerase (DNA directed), theta	ENSMUSG00000034206	0.599437	8.99028	3.7658	0.000618019	0.056514	-0.329156		0.481903	9.14625	5.46648	7.35204e-05	0.0107104	1.85281
10389606	Prr11	proline rich 11	ENSMUSG00000020493	0.702053	11.0156	4.34665	0.000115209	0.0243747	1.1848		0.322059	11.4544	3.44547	0.00376843	0.0824714	-1.91093
10469312	Pter	phosphotriesterase related	ENSMUSG00000026730	-0.794825	8.57229	-5.16311	1.00657e-05	0.00635068	3.38937		0.337785	9.2871	3.51767	0.00325708	0.0760809	-1.77226
10500666	Ptgfrn	prostaglandin F2 receptor negative regulator	ENSMUSG00000027864	0.668928	9.35256	3.77031	0.000610178	0.056514	-0.317688		0.454372	9.07422	5.07759	0.000151597	0.0165318	1.16232
10471721	Ptgs1	prostaglandin-endoperoxide synthase 1	ENSMUSG00000047250	-0.569766	11.8688	-3.47935	0.00137675	0.0778225	-1.04661		-0.414441	11.8944	-4.55822	0.000410372	0.0275802	0.209034
10366457	Ptprr	protein tyrosine phosphatase, receptor type, R	ENSMUSG00000020151	-0.771426	9.75055	-4.68427	4.23577e-05	0.0153091	2.08954		-0.935054	10.4146	-9.87867	8.00719e-08	0.000191011	8.09334
10515257	Rad54l	RAD54 like (S. cerevisiae)	ENSMUSG00000028702	0.660198	9.31084	3.84326	0.000495919	0.0525255	-0.131367		0.486655	9.20546	4.29615	0.000685971	0.0349095	-0.283314
10394978	Rrm2	ribonucleotide reductase M2	ENSMUSG00000020649	0.93105	11.2582	5.97409	8.6898e-07	0.00129554	5.59873		0.32066	11.3012	3.3432	0.00463336	0.0899521	-2.10707
10607467	Sat1	spermidine/spermine N1-acetyl transferase 1	ENSMUSG00000025283	-0.534263	10.6554	-3.27952	0.00237428	0.0997113	-1.53209		0.322249	11.1859	3.70574	0.00222891	0.0632043	-1.41078
10483324	Scn9a	sodium channel, voltage-gated, type IX, alpha	ENSMUSG00000075316	-1.02237	9.58573	-6.16408	4.90223e-07	0.00083527	6.11292		-0.668308	10.5663	-6.28673	1.70842e-05	0.00525863	3.23517
10508651	Sdc3	syndecan 3	ENSMUSG00000025743	-1.35406	10.1511	-7.64047	6.22726e-09	4.44479e-05	9.99193		-0.775936	9.81585	-9.56788	1.20085e-07	0.000229171	7.74309
10530059	Sel1l3	sel-1 suppressor of lin-12-like 3 (C. elegans)	ENSMUSG00000029189	-0.625912	11.46	-3.83274	0.000511015	0.0531683	-0.158326		-0.306867	11.7143	-3.72478	0.00214509	0.0624038	-1.3742
10576883	Shcbp1	Shc SH2-domain binding protein 1	ENSMUSG00000022322	0.58382	10.2085	3.56109	0.0010979	0.0704015	-0.844293		0.37585	10.7261	3.90523	0.00149296	0.0512439	-1.02792
10371321	Slc41a2	solute carrier family 41, member 2	ENSMUSG00000034591	-0.726004	10.6498	-4.5224	6.85511e-05	0.0190142	1.6541		-0.606914	11.5714	-6.24646	1.83138e-05	0.00546094	3.16973
10507112	Stil	Scl/Tal1 interrupting locus	ENSMUSG00000028718	0.553509	9.85032	3.46967	0.00141395	0.0784383	-1.07041		0.324887	10.2375	3.33795	0.00468274	0.090431	-2.11712
10556133	Styx	serine/threonine/tyrosine interaction protein	c(\ENSMUSG00000053205\", \"ENSMUSG00000071748\")"	-0.518353	9.57024	-3.44493	0.00151354	0.0805893	-1.13117		0.281912	10.1002	3.27575	0.00530973	0.0947018	-2.23617
10381934	Tanc2	tetratricopeptide repeat, ankyrin repeat and coiled-coil containing 2	ENSMUSG00000053580	-0.716591	10.6633	-4.31739	0.000125561	0.0245503	1.10705		-0.561201	10.6715	-6.35535	1.51846e-05	0.00516515	3.34606
10368883	Tdg	thymine DNA glycosylase	ENSMUSG00000034674	0.562128	11.3532	3.75864	0.000630682	0.0569581	-0.347371		0.435375	11.717	4.88117	0.0002201	0.0203902	0.805688
10401673	Tgfb3	transforming growth factor, beta 3	ENSMUSG00000021253	-1.14094	9.04965	-6.9266	5.0274e-08	0.000148855	8.14685		-0.766592	9.72521	-8.30597	6.92111e-07	0.000789244	6.19325
10596200	Tmem108	transmembrane protein 108	ENSMUSG00000042757	-0.526965	11.0429	-3.33275	0.00205597	0.0907643	-1.40411		-0.303011	11.4457	-3.66129	0.00243773	0.0662702	-1.49622
10366983	Tmem194	transmembrane protein 194	ENSMUSG00000040195	0.513128	10.517	3.38294	0.00179352	0.084908	-1.28251		0.497252	10.8275	4.57903	0.000394085	0.0271506	0.247838
10409602	Trpc7	transient receptor potential cation channel, subfamily C, member 7	ENSMUSG00000021541	-0.616122	9.32655	-3.9117	0.000407824	0.0481595	0.0445658		-0.888002	9.30512	-10.3345	4.49551e-08	0.000179626	8.58623
10382376	Ttyh2	tweety homolog 2 (Drosophila)	ENSMUSG00000034714	-0.735386	11.4907	-4.76775	3.30105e-05	0.0123036	2.3151		-0.308357	12.1514	-3.25769	0.00550697	0.0968855	-2.27069
10541877	Vamp1	vesicle-associated membrane protein 1	ENSMUSG00000030337	-0.596835	8.85317	-3.58813	0.00101829	0.06785	-0.776925		-0.400111	8.75151	-4.90118	0.000211851	0.0199161	0.842245
10432032	Vdr	vitamin D receptor	ENSMUSG00000022479	-0.739064	9.22968	-3.63965	0.000881753	0.0633084	-0.647981		-0.314503	9.79849	-3.71024	0.00220884	0.0632043	-1.40215
10599187	Zcchc12	zinc finger, CCHC domain containing 12	ENSMUSG00000036699	-0.580896	10.748	-3.77913	0.000595104	0.056514	-0.29522		-0.39498	10.6791	-4.59642	0.00038098	0.0270283	0.280243
10442270	Zfp946	zinc finger protein 946	ENSMUSG00000071266	-0.59862	8.76692	-3.95816	0.000356905	0.0459026	0.164626		0.450199	11.0965	3.89347	0.00152857	0.0514557	-1.05047
10594426	Zwilch	Zwilch, kinetochore associated, homolog (Drosophila)	ENSMUSG00000032400	0.580427	9.9626	3.527	0.00120684	0.0743548	-0.928901		0.472188	10.671	4.79807	0.00025807	0.0220853	0.65334
