# Supplementary material for: The long non-coding RNA Dali is an epigenetic regulator of neural differentiation
Source: eLife journal article supplement (doi:10.7554/elife.04530), 2014-11-21
Supplement: supp [file elife-04530-supp-v1.zip › elife_poa_e04530_Supplementary_File_4.xlsx]

## Sheet: RA differ responders
ID	Symbol	Name	Ensembl	logFC	AveExpr	t	P.Value	adj.P.Val	B
10413012	Fut11	fucosyltransferase 11	ENSMUSG00000039357	2.49134	8.52892	6.58338	2.97636e-05	0.0112628	2.79843
10391555	Ppy	pancreatic polypeptide	ENSMUSG00000017316	-1.38655	8.45744	-9.73502	6.01146e-07	0.00141473	6.24205
10598087	ND6	NADH dehydrogenase subunit 6	ENSMUSG00000064368	1.33708	9.26698	4.01492	0.00181105	0.0678331	-1.09916
10594515	Rnu5g	RNA, U5G small nuclear	ENSMUSG00000095892	1.32754	4.82602	4.65873	0.000594426	0.0428392	-0.0294359
10450920	AY036118	cDNA sequence AY036118	NA	1.02715	10.5971	4.02468	0.00178005	0.0672633	-1.08257
10450982	Gpr115	G protein-coupled receptor 115	ENSMUSG00000023918	-1.00713	8.37336	-8.45785	2.56688e-06	0.00361738	5.00462
10367497	Olfr787	olfactory receptor 787	ENSMUSG00000096497	-0.888783	3.11322	-4.7111	0.000544199	0.0407706	0.0551467
10442069	Lix1	limb expression 1 homolog (chicken)	ENSMUSG00000047786	-0.821539	7.16755	-5.33742	0.000194925	0.0277731	1.0349
10544523	Rny1	RNA, Y1 small cytoplasmic, Ro-associated	ENSMUSG00000065701	0.819458	8.8417	4.80717	0.000463271	0.0404989	0.209293
10583203	Phxr4	per-hexamer repeat gene 4	NA	0.793393	7.03842	6.02948	6.68352e-05	0.018206	2.04523
10524909	Nos1	nitric oxide synthase 1, neuronal	ENSMUSG00000029361	0.77042	7.31323	8.99679	1.36459e-06	0.00219778	5.55052
10434741	Eif4a2	eukaryotic translation initiation factor 4A2	ENSMUSG00000022884	0.754645	7.59309	4.0612	0.0016689	0.0653305	-1.02061
10568553	Chst15	carbohydrate (N-acetylgalactosamine 4-sulfate 6-O) sulfotransferase 15	ENSMUSG00000030930	0.749277	7.36676	5.04643	0.000311944	0.0356867	0.587215
10487040	Fbn1	fibrillin 1	ENSMUSG00000027204	0.746157	7.98706	11.306	1.22582e-07	0.00138199	7.52282
10357222	Gm101	predicted gene 101	ENSMUSG00000036962	-0.717775	6.73726	-6.58391	2.97414e-05	0.0112628	2.79912
10416090	Stmn4	stathmin-like 4	ENSMUSG00000022044	-0.698771	8.31317	-7.48076	8.73913e-06	0.00764894	3.91771
10471721	Ptgs1	prostaglandin-endoperoxide synthase 1	ENSMUSG00000047250	0.684774	10.8562	8.05669	4.19018e-06	0.00472401	4.57412
10514466	Jun	jun proto-oncogene	ENSMUSG00000052684	-0.684597	9.8003	-8.35173	2.91725e-06	0.00365435	4.8928
10584674	Mcam	melanoma cell adhesion molecule	ENSMUSG00000032135	-0.683725	9.23579	-9.69534	6.27432e-07	0.00141473	6.20644
10455912	Isoc1	isochorismatase domain containing 1	ENSMUSG00000024601	-0.667115	10.194	-10.4735	2.7781e-07	0.00141473	6.87434
10493664	Nup210l	nucleoporin 210-like	ENSMUSG00000027939	-0.648699	6.23103	-5.10958	0.000281401	0.0333949	0.685488
10531415	Cxcl10	chemokine (C-X-C motif) ligand 10	ENSMUSG00000034855	-0.634485	6.51866	-3.93791	0.00207597	0.0717636	-1.23035
10376887	Snord49a	small nucleolar RNA, C/D box 49A	ENSMUSG00000065734	0.63144	9.26441	5.6649	0.00011648	0.0217201	1.52261
10522895	Csn3	casein kappa	ENSMUSG00000001622	-0.620555	6.09687	-3.58345	0.00392104	0.0950663	-1.84081
10386195	Olfr224	olfactory receptor 224	ENSMUSG00000059279	-0.605428	3.96284	-4.86973	0.000417437	0.0400383	0.308949
10583732	Ldlr	low density lipoprotein receptor	ENSMUSG00000032193	-0.604791	10.6332	-5.49057	0.000152925	0.0232984	1.26511
10382106	Milr1	mast cell immunoglobulin like receptor 1	ENSMUSG00000040528	0.604518	8.18208	5.61503	0.000125859	0.0224132	1.44945
10429218	Fam135b	family with sequence similarity 135, member B	ENSMUSG00000036800	-0.602853	5.64236	-3.77031	0.00280014	0.081997	-1.51778
10389894	Abcc3	ATP-binding cassette, sub-family C (CFTR/MRP), member 3	ENSMUSG00000020865	0.598414	8.98188	9.33217	9.34394e-07	0.00175573	5.87243
10554938	Rab30	RAB30, member RAS oncogene family	ENSMUSG00000030643	-0.591837	7.46913	-6.96662	1.74173e-05	0.00894646	3.29134
10497077	Mir186	microRNA 186	NA	0.590013	6.68682	4.83021	0.000445806	0.0403988	0.246062
10462623	Ifit1	interferon-induced protein with tetratricopeptide repeats 1	ENSMUSG00000034459	-0.586752	5.78538	-5.28049	0.00021351	0.0284118	0.948351
10372293	Otogl	otogelin-like	ENSMUSG00000091455	-0.579798	6.4033	-5.68433	0.00011303	0.0217201	1.551
10569280	Dusp8	dual specificity phosphatase 8	ENSMUSG00000037887	-0.575978	9.70752	-9.97977	4.63092e-07	0.00141473	6.4579
10542885	2810474O19Rik	RIKEN cDNA 2810474O19 gene	ENSMUSG00000032712	-0.567894	8.76097	-5.11998	0.000276678	0.0333949	0.70162
10559928	Vmn2r30	vomeronasal 2, receptor 30	ENSMUSG00000070847	0.565336	5.66679	7.90198	5.08582e-06	0.00521251	4.40233
10471505	Sh2d3c	SH2 domain containing 3C	ENSMUSG00000059013	-0.561585	9.20287	-7.46821	8.88397e-06	0.00764894	3.90289
10450363	Snord52	small nucleolar RNA, C/D box 52	ENSMUSG00000093009	0.544891	7.9761	4.48881	0.000793607	0.0470901	-0.306586
10391540	Mpp2	membrane protein, palmitoylated 2 (MAGUK p55 subfamily member 2)	ENSMUSG00000017314	-0.539918	8.88737	-7.41734	9.49841e-06	0.00764894	3.84256
10351473	Sh2d1b2	SH2 domain protein 1B2	ENSMUSG00000073494	-0.538902	3.92906	-5.11555	0.000278679	0.0333949	0.694751
10508608	Pef1	penta-EF hand domain containing 1	ENSMUSG00000028779	-0.537614	8.47496	-6.51838	3.26578e-05	0.0118769	2.71255
10384504	Meis1	Meis homeobox 1	ENSMUSG00000020160	-0.536028	8.16127	-6.20258	5.16739e-05	0.0161879	2.28587
10367436	Cd63	CD63 antigen	ENSMUSG00000025351	0.528664	10.0541	5.23992	0.000227886	0.0291953	0.886373
10434698	Fetub	fetuin beta	ENSMUSG00000022871	0.526829	9.80077	5.2502	0.000224151	0.0290468	0.902097
10545771	Cyp26b1	cytochrome P450, family 26, subfamily b, polypeptide 1	ENSMUSG00000063415	-0.52562	7.85449	-3.72204	0.00305371	0.0860689	-1.601
10375259	Gabrb2	gamma-aminobutyric acid (GABA) A receptor, subunit beta 2	ENSMUSG00000007653	0.525048	4.10881	4.04427	0.0017195	0.066389	-1.04931
10566723	Lmo1	LIM domain only 1	ENSMUSG00000036111	-0.523864	9.05401	-6.86945	1.99159e-05	0.00976226	3.16851
10419578	Ndrg2	N-myc downstream regulated gene 2	ENSMUSG00000004558	0.522317	7.93125	4.6566	0.000596572	0.0428392	-0.0328899
10376060	Irf1	interferon regulatory factor 1	ENSMUSG00000018899	-0.512168	7.41599	-5.30335	0.000205833	0.0282996	0.98316
10574350	Mmp15	matrix metallopeptidase 15	ENSMUSG00000031790	-0.512008	8.55739	-4.0895	0.00158772	0.0646209	-0.972686
10564520	Snora21	small nucleolar RNA, H/ACA box 21	NA	0.51084	8.82614	3.87488	0.0023225	0.07519	-1.33816
10383502	Slc16a3	solute carrier family 16 (monocarboxylic acid transporters), member 3	ENSMUSG00000025161	0.509469	11.3343	5.92157	7.86266e-05	0.0189992	1.89279
10520025	Psmc2	proteasome (prosome, macropain) 26S subunit, ATPase 2	ENSMUSG00000028932	0.509423	9.42248	5.80291	9.41845e-05	0.0208203	1.72297
10404069	Hist1h1a	histone cluster 1, H1a	ENSMUSG00000049539	-0.508579	10.2121	-4.57007	0.000690845	0.0460501	-0.17355
10376885	Snord49b	small nucleolar RNA, C/D box 49B	ENSMUSG00000064437	0.507601	12.4592	4.84807	0.000432741	0.0400383	0.274514
10412267	Itga2	integrin alpha 2	ENSMUSG00000015533	0.505328	8.28411	6.03251	6.65325e-05	0.018206	2.04949
10572456	Jund	jun D proto-oncogene	ENSMUSG00000071076	-0.505019	9.62431	-5.65917	0.000117521	0.0217201	1.51421
10371107	Mrpl54	mitochondrial ribosomal protein L54	ENSMUSG00000034932	-0.502662	9.16424	-4.69294	0.000561088	0.0413445	0.0258698
10399360	Rhob	ras homolog gene family, member B	ENSMUSG00000054364	-0.501693	8.42739	-7.16668	1.32661e-05	0.00875372	3.53975
10606792	Nxf7	nuclear RNA export factor 7	ENSMUSG00000031410	-0.498624	9.98774	-5.88256	8.34171e-05	0.0191927	1.83721
10524621	Oasl2	2'-5' oligoadenylate synthetase-like 2	ENSMUSG00000029561	-0.497334	6.89153	-4.82737	0.00044792	0.0403988	0.241535
10502823	Dnajb4	DnaJ (Hsp40) homolog, subfamily B, member 4	ENSMUSG00000028035	0.495631	8.51981	6.15702	5.52723e-05	0.0163984	2.223
10524417	Iscu	IscU iron-sulfur cluster scaffold homolog (E. coli)	ENSMUSG00000025825	-0.495176	9.52271	-4.08273	0.00160676	0.0648769	-0.984141
10565609	Thrsp	thyroid hormone responsive	ENSMUSG00000035686	-0.4949	6.85791	-6.76516	2.3029e-05	0.0103852	3.03506
10485466	Cat	catalase	ENSMUSG00000027187	-0.494829	9.46012	-5.84289	8.86064e-05	0.019979	1.78044
10527799	Gm10850	predicted gene 10850	NA	0.492416	7.0402	6.57852	2.99702e-05	0.0112628	2.79203
10551841	Polr2i	polymerase (RNA) II (DNA directed) polypeptide I	ENSMUSG00000019738	-0.490314	7.53776	-4.68835	0.00056545	0.0413953	0.01845
10346150	Tmeff2	transmembrane protein with EGF-like and two follistatin-like domains 2	ENSMUSG00000026109	0.48991	8.95466	5.92472	7.82536e-05	0.0189992	1.89725
10565389	Olfr307	olfactory receptor 307	ENSMUSG00000055610	0.488343	5.40283	3.71781	0.003077	0.086509	-1.60829
10520388	Rbm33	RNA binding motif protein 33	ENSMUSG00000048271	0.487769	8.3742	5.50026	0.000150612	0.0232984	1.27956
10402318	Prima1	proline rich membrane anchor 1	ENSMUSG00000041669	-0.487582	8.40208	-6.59881	2.91175e-05	0.0112628	2.81872
10507594	Slc2a1	solute carrier family 2 (facilitated glucose transporter), member 1	ENSMUSG00000028645	0.485856	10.3044	5.93517	7.70271e-05	0.0189992	1.91209
10606609	Tspan6	tetraspanin 6	ENSMUSG00000067377	0.485094	4.85433	5.12255	0.000275527	0.0333949	0.705595
10583378	Olfr830	olfactory receptor 830	ENSMUSG00000062868	0.483886	4.25113	3.63008	0.00360405	0.0916291	-1.75998
10488693	Tspyl3	TSPY-like 3	ENSMUSG00000074671	0.482521	7.40789	3.8422	0.00246203	0.0766767	-1.3942
10489239	9430008C03Rik	RIKEN cDNA 9430008C03 gene	NA	0.482518	10.7687	5.28456	0.000212119	0.0284118	0.954566
10403352	Klf6	Kruppel-like factor 6	ENSMUSG00000000078	-0.480382	9.06303	-6.31435	4.38598e-05	0.0145434	2.4387
10586454	D030028M11Rik	RIKEN cDNA D030028M11 gene	NA	0.479427	7.29725	4.65198	0.000601254	0.0429021	-0.0403822
10434664	Ndufa11	NADH dehydrogenase (ubiquinone) 1 alpha subcomplex 11	ENSMUSG00000002379	-0.478516	9.98455	-5.45282	0.0001623	0.024076	1.20872
10403834	Sfrp4	secreted frizzled-related protein 4	ENSMUSG00000021319	-0.471301	5.86265	-4.49766	0.000781678	0.0470901	-0.292053
10508719	Snora16a	small nucleolar RNA, H/ACA box 16A	ENSMUSG00000065097	0.468994	11.9539	4.09929	0.00156061	0.0637474	-0.956132
10583386	Olfr835	olfactory receptor 835	ENSMUSG00000045204	0.468842	4.80728	3.62508	0.00363679	0.0916291	-1.76865
10415980	Fbxo16	F-box protein 16	ENSMUSG00000034532	-0.468492	7.65281	-4.10267	0.00155135	0.0637474	-0.950413
10369752	Lrrtm3	leucine rich repeat transmembrane neuronal 3	ENSMUSG00000042846	0.467883	6.7916	3.63265	0.00358742	0.0916291	-1.75555
10550237	Napa	N-ethylmaleimide sensitive fusion protein attachment protein alpha	ENSMUSG00000006024	-0.467372	8.92465	-7.14092	1.37355e-05	0.00875372	3.5081
10472916	Cdca7	cell division cycle associated 7	ENSMUSG00000055612	-0.465953	7.91314	-4.14219	0.0014473	0.0620624	-0.883697
10408329	Top2a	topoisomerase (DNA) II alpha	ENSMUSG00000020914	0.46521	9.07878	4.2249	0.00125231	0.0595719	-0.744643
10458589	Prelid2	PRELI domain containing 2	ENSMUSG00000056671	0.460056	7.54923	4.16459	0.00139156	0.0620097	-0.845955
10518751	Car6	carbonic anhydrase 6	ENSMUSG00000028972	0.458581	9.34253	3.51542	0.00443545	0.099811	-1.95894
10407598	Ryr2	ryanodine receptor 2, cardiac	ENSMUSG00000021313	-0.456749	7.42863	-6.43179	3.69867e-05	0.0130309	2.59714
10409660	Gkap1	G kinase anchoring protein 1	ENSMUSG00000021552	-0.456361	8.32608	-4.26168	0.00117455	0.057825	-0.683056
10393559	Timp2	tissue inhibitor of metalloproteinase 2	ENSMUSG00000017466	-0.453769	7.55437	-4.11787	0.00151044	0.0633037	-0.924731
10456046	Pdgfrb	platelet derived growth factor receptor, beta polypeptide	ENSMUSG00000024620	0.453266	7.72267	5.75286	0.000101697	0.0213639	1.65066
10548735	Dusp16	dual specificity phosphatase 16	ENSMUSG00000030203	-0.452817	9.28316	-7.08719	1.47729e-05	0.00875372	3.44176
10563649	Uevld	UEV and lactate/malate dehyrogenase domains	ENSMUSG00000043262	0.450467	7.87308	5.01176	0.000330182	0.0364948	0.532988
10439881	5330426P16Rik	RIKEN cDNA 5330426P16 gene	NA	0.449928	8.70202	3.62486	0.00363823	0.0916291	-1.76903
10592084	St3gal4	ST3 beta-galactoside alpha-2,3-sialyltransferase 4	ENSMUSG00000032038	0.447977	8.22587	4.73414	0.000523525	0.0404989	0.0922414
10399478	Lpin1	lipin 1	ENSMUSG00000020593	-0.446293	9.42802	-7.05049	1.5529e-05	0.00875372	3.39622
10368918	Sobp	sine oculis-binding protein homolog (Drosophila)	ENSMUSG00000038248	0.446045	9.87661	6.96492	1.74581e-05	0.00894646	3.2892
10498885	Gria2	glutamate receptor, ionotropic, AMPA2 (alpha 2)	ENSMUSG00000033981	0.445482	8.97324	6.8256	2.11665e-05	0.00994298	3.11259
10397606	Tshr	thyroid stimulating hormone receptor	ENSMUSG00000020963	-0.444736	5.79053	-5.90511	8.0612e-05	0.0189992	1.86936
10400405	Nfkbia	nuclear factor of kappa light polypeptide gene enhancer in B cells inhibitor, alpha	ENSMUSG00000021025	-0.444691	9.22121	-4.98028	0.000347714	0.037813	0.483593
10509901	Mfap2	microfibrillar-associated protein 2	ENSMUSG00000060572	0.443891	10.4432	4.15741	0.00140919	0.0620441	-0.858051
10483131	Kcnh7	potassium voltage-gated channel, subfamily H (eag-related), member 7	ENSMUSG00000059742	-0.442856	6.42263	-4.85227	0.00042973	0.0400383	0.281193
10591853	Tbx20	T-box 20	ENSMUSG00000031965	-0.442797	9.26703	-4.88367	0.00040789	0.0400383	0.331073
10385500	Irgm1	immunity-related GTPase family M member 1	ENSMUSG00000046879	-0.441366	6.77411	-6.16748	5.44231e-05	0.0163984	2.23746
10347781	Nyap2	neuronal tyrosine-phophorylated phosphoinositide 3-kinase adaptor 2	ENSMUSG00000054976	-0.440153	7.19007	-5.32533	0.000198726	0.0277731	1.01655
10490794	Pkia	protein kinase inhibitor, alpha	ENSMUSG00000027499	-0.439898	8.23178	-4.30282	0.00109353	0.0550251	-0.61439
10346876	Snora41	small nucleolar RNA, H/ACA box 41	NA	0.439421	6.84986	4.00832	0.00183231	0.0681765	-1.11038
10405892	Gm10767	predicted gene 10767	ENSMUSG00000074826	-0.438889	7.15419	-5.26729	0.00021808	0.0285887	0.928214
10481857	Pbx3	pre B cell leukemia homeobox 3	ENSMUSG00000038718	-0.437996	10.4802	-6.20235	5.1691e-05	0.0161879	2.28556
10491825	3110057O12Rik	RIKEN cDNA 3110057O12 gene	ENSMUSG00000037818	0.435513	8.04174	4.79017	0.000476611	0.0404989	0.182125
10594144	Bbs4	Bardet-Biedl syndrome 4 (human)	ENSMUSG00000025235	-0.435219	7.74702	-7.18387	1.29625e-05	0.00875372	3.56081
10606315	Taf9b	TAF9B RNA polymerase II, TATA box binding protein (TBP)-associated factor	ENSMUSG00000047242	-0.432486	8.22486	-5.55448	0.000138331	0.0229344	1.36009
10453887	Cables1	CDK5 and Abl enzyme substrate 1	ENSMUSG00000040957	-0.428418	7.48671	-5.75228	0.000101788	0.0213639	1.64983
10595171	Mb21d1	Mab-21 domain containing 1	ENSMUSG00000032344	0.427702	5.92112	4.17083	0.00137643	0.0615789	-0.83545
10502890	St6galnac3	ST6 (alpha-N-acetyl-neuraminyl-2,3-beta-galactosyl-1,3)-N-acetylgalactosaminide alpha-2,6-sialyltransferase 3	ENSMUSG00000052544	0.426493	8.85167	4.11869	0.00150825	0.0633037	-0.923338
10408359	Nrsn1	neurensin 1	ENSMUSG00000048978	0.426114	9.41358	4.55983	0.000702984	0.0462025	-0.190256
10462005	Tmem2	transmembrane protein 2	ENSMUSG00000024754	0.423692	9.34326	7.11377	1.42497e-05	0.00875372	3.47463
10408613	Tubb2b	tubulin, beta 2B class IIB	ENSMUSG00000045136	-0.423643	10.346	-4.73613	0.000521778	0.0404989	0.0954423
10477644	Trp53inp2	transformation related protein 53 inducible nuclear protein 2	ENSMUSG00000038375	-0.420696	10.1005	-6.60074	2.90378e-05	0.0112628	2.82125
10541895	Tnfrsf1a	tumor necrosis factor receptor superfamily, member 1a	ENSMUSG00000030341	0.420667	9.35974	4.46848	0.000821724	0.0475895	-0.34
10578763	Sap30	sin3 associated polypeptide	ENSMUSG00000031609	-0.416683	9.28314	-3.98245	0.00191821	0.0699868	-1.1544
10514128	Ttc39b	tetratricopeptide repeat domain 39B	ENSMUSG00000038172	0.415267	9.69855	4.76239	0.000499293	0.0404989	0.13762
10372410	Glipr1	GLI pathogenesis-related 1 (glioma)	ENSMUSG00000056888	-0.415021	7.95637	-3.93391	0.00209081	0.0717636	-1.23719
10501235	Gstm4	glutathione S-transferase, mu 4	ENSMUSG00000027890	-0.413653	8.6512	-3.97664	0.00193805	0.0700297	-1.16429
10377255	Stx8	syntaxin 8	ENSMUSG00000020903	-0.412984	8.47644	-4.06626	0.00165407	0.0652026	-1.01203
10447349	Cript	cysteine-rich PDZ-binding protein	ENSMUSG00000024146	-0.412697	9.62547	-5.09422	0.000288527	0.0338839	0.661645
10523483	Prdm8	PR domain containing 8	ENSMUSG00000035456	-0.412626	6.71093	-3.77209	0.00279124	0.0819492	-1.51472
10404059	Hist1h1c	histone cluster 1, H1c	ENSMUSG00000036181	-0.412539	9.275	-4.48012	0.000805502	0.0475457	-0.320864
10366951	Ndufa4l2	NADH dehydrogenase (ubiquinone) 1 alpha subcomplex, 4-like 2	ENSMUSG00000040280	0.411943	7.06487	3.92495	0.00212436	0.0722137	-1.25249
10570972	A730045E13Rik	RIKEN cDNA A730045E13 gene	NA	0.411846	5.68051	4.07878	0.00161797	0.0648901	-0.990821
10469237	Mir466	microRNA 466	NA	0.411627	3.47275	4.15109	0.00142487	0.0620441	-0.868684
10381934	Tanc2	tetratricopeptide repeat, ankyrin repeat and coiled-coil containing 2	ENSMUSG00000053580	-0.410181	9.32658	-5.74884	0.000102328	0.0213639	1.64483
10375570	Olfr1383	olfactory receptor 1383	ENSMUSG00000057767	-0.409175	5.79568	-4.40465	0.000916999	0.0504305	-0.445308
10462818	Hhex	hematopoietically expressed homeobox	ENSMUSG00000024986	0.409126	7.93128	4.93884	0.000372294	0.037813	0.418348
10392010	Kansl1	KAT8 regulatory NSL complex subunit 1	ENSMUSG00000018412	0.408973	9.59831	4.75726	0.000503605	0.0404989	0.129388
10558333	Fank1	fibronectin type 3 and ankyrin repeat domains 1	ENSMUSG00000053111	0.408077	6.08338	4.13983	0.0014533	0.0620624	-0.887671
10358713	1700025G04Rik	RIKEN cDNA 1700025G04 gene	ENSMUSG00000032666	0.407328	8.03186	4.58374	0.00067497	0.0460501	-0.151256
10452613	Arhgap28	Rho GTPase activating protein 28	ENSMUSG00000024043	0.407028	6.3379	3.93195	0.00209809	0.0717636	-1.24053
10484920	Ptpmt1	protein tyrosine phosphatase, mitochondrial 1	NA	-0.40637	8.94409	-4.85599	0.000427078	0.0400383	0.287115
10473312	Fam171b	family with sequence similarity 171, member B	ENSMUSG00000048388	-0.404159	10.5482	-3.95556	0.00201192	0.0710042	-1.20024
10533050	Hspb8	heat shock protein 8	ENSMUSG00000041548	-0.403653	10.4473	-5.0375	0.000316539	0.0356867	0.57326
10391744	Gpatch8	G patch domain containing 8	ENSMUSG00000034621	0.403422	8.6558	3.62073	0.00366549	0.0916291	-1.77619
10495243	Gstm5	glutathione S-transferase, mu 5	ENSMUSG00000004032	-0.402474	9.28655	-4.49587	0.000784071	0.0470901	-0.294986
10362581	Tube1	epsilon-tubulin 1	ENSMUSG00000019845	0.399508	8.38682	4.5411	0.000725785	0.04633	-0.220874
10537791	Olfr453	olfactory receptor 453	ENSMUSG00000095831	0.3967	5.49529	3.5203	0.00439635	0.0992866	-1.95046
10373515	Suox	sulfite oxidase	ENSMUSG00000049858	-0.396469	8.26087	-4.93893	0.000372243	0.037813	0.418479
10529732	Hs3st1	heparan sulfate (glucosamine) 3-O-sulfotransferase 1	ENSMUSG00000051022	0.395235	6.82981	4.35351	0.0010016	0.0527747	-0.530045
10459799	1700003O11Rik	RIKEN cDNA 1700003O11 gene	NA	-0.395003	6.19319	-4.80449	0.000465345	0.0404989	0.205019
10404033	Hist1h1d	histone cluster 1, H1d	ENSMUSG00000052565	-0.39473	6.68483	-3.71032	0.00311877	0.0870321	-1.62123
10365116	Dohh	deoxyhypusine hydroxylase/monooxygenase	ENSMUSG00000078440	-0.394309	8.34748	-4.23241	0.001236	0.0590453	-0.732048
10381298	Ramp2	receptor (calcitonin) activity modifying protein 2	ENSMUSG00000001240	0.394075	8.19172	4.20919	0.00128711	0.0596696	-0.770982
10373093	Dtx3	deltex 3 homolog (Drosophila)	ENSMUSG00000040415	0.393793	9.82282	3.63085	0.00359905	0.0916291	-1.75865
10583634	Qtrt1	queuine tRNA-ribosyltransferase 1	ENSMUSG00000002825	-0.392269	9.77369	-4.79673	0.000471418	0.0404989	0.19261
10390175	Ngfr	nerve growth factor receptor (TNFR superfamily, member 16)	ENSMUSG00000000120	0.391521	10.5059	4.78018	0.000484642	0.0404989	0.166131
10371466	Syn3	synapsin III	ENSMUSG00000059602	-0.391403	7.79532	-5.32276	0.000199541	0.0277731	1.01267
10464529	Tcirg1	T cell, immune regulator 1, ATPase, H+ transporting, lysosomal V0 protein A3	ENSMUSG00000001750	0.391093	8.04744	4.85113	0.000430548	0.0400383	0.279374
10440070	Tmem30c	transmembrane protein 30C	ENSMUSG00000022753	-0.389367	4.77844	-5.55557	0.000138095	0.0229344	1.3617
10517287	Man1c1	mannosidase, alpha, class 1C, member 1	ENSMUSG00000037306	0.388369	9.97413	4.24387	0.00121156	0.0587735	-0.712859
10399632	F630048H11Rik	RIKEN cDNA F630048H11 gene	NA	0.387733	6.11141	4.45044	0.000847552	0.0482587	-0.369704
10467175	A830019P07Rik	RIKEN cDNA A830019P07 gene	NA	-0.387552	8.82067	-4.73407	0.000523584	0.0404989	0.0921346
10419343	Atg14	autophagy related 14	ENSMUSG00000037526	-0.387188	7.44604	-4.61906	0.0006357	0.0445148	-0.0937827
10598976	Timp1	tissue inhibitor of metalloproteinase 1	ENSMUSG00000001131	0.38654	7.64681	3.68279	0.00327724	0.0890305	-1.6688
10578619	Cdkn2aip	CDKN2A interacting protein	ENSMUSG00000038069	-0.386387	9.22611	-6.01968	6.78242e-05	0.018206	2.03147
10505000	Nipsnap3b	nipsnap homolog 3B (C. elegans)	ENSMUSG00000015247	-0.385933	7.62795	-5.46928	0.000158141	0.0237717	1.23333
10489038	Scand1	SCAN domain-containing 1	ENSMUSG00000046229	-0.385434	10.3986	-4.89415	0.000400865	0.0399942	0.347682
10449315	Uqcc2	ubiquinol-cytochrome c reductase complex assembly factor 2	ENSMUSG00000024208	-0.383415	10.1079	-5.27844	0.00021421	0.0284118	0.945237
10360684	Ephx1	epoxide hydrolase 1, microsomal	ENSMUSG00000038776	-0.382872	10.0011	-4.39787	0.000927763	0.0506336	-0.456513
10476791	4930529M08Rik	RIKEN cDNA 4930529M08 gene	ENSMUSG00000037143	-0.381068	6.6824	-4.55256	0.000711746	0.04633	-0.202137
10350136	Csrp1	cysteine and glycine-rich protein 1	ENSMUSG00000026421	-0.380327	9.98533	-5.90283	8.08907e-05	0.0189992	1.86611
10577152	E330037G11Rik	RIKEN cDNA E330037G11 gene	NA	0.380004	6.07772	3.58202	0.0039312	0.0951079	-1.84329
10524631	Oasl1	2'-5' oligoadenylate synthetase-like 1	ENSMUSG00000041827	-0.379904	8.23165	-5.59733	0.000129376	0.0224132	1.42339
10407286	BC067074	cDNA sequence BC067074	ENSMUSG00000021763	-0.378865	6.01692	-3.59712	0.00382529	0.0936527	-1.81711

## Sheet: Prolif stable Dali KD vs cont
ID	Symbol	Name	Ensembl	logFC	AveExpr	t	P.Value	adj.P.Val	B
10607143	Capn6	calpain 6	ENSMUSG00000067276	-2.87694	7.81034	-31.3654	1.24443e-12	9.05595e-09	18.5636
10442069	Lix1	limb expression 1 homolog (chicken)	ENSMUSG00000047786	-2.1998	7.16755	-20.2117	1.92096e-10	4.33137e-07	14.3921
10413012	Fut11	fucosyltransferase 11	ENSMUSG00000039357	-2.06571	8.52892	-7.7197	6.41211e-06	0.000167726	4.08793
10548892	Arhgdib	Rho, GDP dissociation inhibitor (GDI) beta	ENSMUSG00000030220	-2.00809	7.14412	-16.1012	2.50318e-09	1.13621e-06	11.9954
10443854	Cyp4f39	cytochrome P450, family 4, subfamily f, polypeptide 39	ENSMUSG00000061126	-1.83823	7.14549	-23.5087	3.42601e-11	1.28749e-07	15.9112
10406782	Fam169a	family with sequence similarity 169, member A	ENSMUSG00000041817	-1.69461	7.62239	-21.0296	1.22307e-10	3.44723e-07	14.7978
10550790	Nlrp4e	NLR family, pyrin domain containing 4E	ENSMUSG00000045693	1.68903	5.77283	10.8482	1.90986e-07	1.90091e-05	7.6988
10391555	Ppy	pancreatic polypeptide	ENSMUSG00000017316	1.68777	8.45744	16.7583	1.59801e-09	8.66121e-07	12.4242
10594044	Islr	immunoglobulin superfamily containing leucine-rich repeat	ENSMUSG00000037206	-1.57586	9.47067	-30.6788	1.60652e-12	9.05595e-09	18.3737
10450767	H2-M10.1	histocompatibility 2, M region locus 10.1	ENSMUSG00000024448	1.55631	7.34154	9.36584	9.00068e-07	5.02345e-05	6.11442
10369481	H2afy2	H2A histone family, member Y2	ENSMUSG00000020086	1.51122	6.96124	5.48193	0.000155019	0.00146537	0.782461
10429218	Fam135b	family with sequence similarity 135, member B	ENSMUSG00000036800	1.46402	5.64236	12.9488	2.80595e-08	5.27237e-06	9.62941
10355500	Igfbp5	insulin-like growth factor binding protein 5	ENSMUSG00000026185	-1.3038	7.01515	-9.71051	6.17239e-07	3.99928e-05	6.50149
10599174	Il13ra1	interleukin 13 receptor, alpha 1	ENSMUSG00000017057	-1.29177	6.42552	-14.4492	8.37049e-09	2.35922e-06	10.8246
10598087	ND6	NADH dehydrogenase subunit 6	ENSMUSG00000064368	-1.20533	9.26698	-5.11846	0.000277363	0.00221145	0.17996
10395553	Nrcam	neuron-glia-CAM-related cell adhesion molecule	ENSMUSG00000020598	-1.18503	6.40432	-12.7984	3.18924e-08	5.53161e-06	9.50177
10524909	Nos1	nitric oxide synthase 1, neuronal	ENSMUSG00000029361	-1.17906	7.31323	-19.472	2.93366e-10	4.90632e-07	14.007
10429203	Fam135b	family with sequence similarity 135, member B	ENSMUSG00000036800	1.16758	6.63915	12.3136	4.86223e-08	7.43232e-06	9.08001
10474373	Kcna4	potassium voltage-gated channel, shaker-related subfamily, member 4	ENSMUSG00000042604	-1.16725	6.63092	-13.4488	1.85031e-08	3.93592e-06	10.0431
10414228	1700024B05Rik	RIKEN cDNA 1700024B05 gene	ENSMUSG00000052334	-1.16576	7.53204	-18.2885	5.96812e-10	5.17574e-07	13.3514
10434698	Fetub	fetuin beta	ENSMUSG00000022871	-1.15914	9.80077	-16.3364	2.12757e-09	1.04288e-06	12.1512
10350630	Fam129a	family with sequence similarity 129, member A	ENSMUSG00000026483	-1.147	8.66712	-19.4074	3.04633e-10	4.90632e-07	13.9725
10425726	Sept3	septin 3	ENSMUSG00000022456	1.14642	7.47327	11.3166	1.21357e-07	1.4105e-05	8.15862
10472350	Gca	grancalcin	ENSMUSG00000026893	-1.13806	5.59235	-11.8868	7.13452e-08	9.80909e-06	8.69479
10455080	Pcdhb9	protocadherin beta 9	ENSMUSG00000051242	1.13388	4.99188	11.9817	6.54483e-08	9.10943e-06	8.7816
10469581	Etl4	enhancer trap locus 4	ENSMUSG00000036617	-1.12912	7.35876	-15.9752	2.73333e-09	1.18521e-06	11.9109
10419162	4930503E14Rik	RIKEN cDNA 4930503E14 gene	ENSMUSG00000072595	-1.12799	6.24191	-7.94217	4.835e-06	0.000141078	4.38025
10414234	1700024B05Rik	RIKEN cDNA 1700024B05 gene	ENSMUSG00000052334	-1.12086	7.4928	-18.2985	5.9313e-10	5.17574e-07	13.3572
10450920	AY036118	cDNA sequence AY036118	NA	-1.11777	10.5971	-6.19391	5.23386e-05	0.000667495	1.90915
10432540	Lima1	LIM domain and actin binding 1	ENSMUSG00000023022	-1.10468	7.09277	-10.747	2.11117e-07	2.02929e-05	7.59693
10357222	Gm101	predicted gene 101	ENSMUSG00000036962	1.09347	6.73726	14.1846	1.02742e-08	2.65255e-06	10.6236
10603768	Efhc2	EF-hand domain (C-terminal) containing 2	ENSMUSG00000025038	-1.09006	6.76706	-11.2745	1.26316e-07	1.45315e-05	8.11808
10529824	Prom1	prominin 1	ENSMUSG00000029086	-1.08394	6.20881	-9.18776	1.09844e-06	5.47958e-05	5.9097
10409602	Trpc7	transient receptor potential cation channel, subfamily C, member 7	ENSMUSG00000021541	1.0471	8.47771	16.7441	1.61332e-09	8.66121e-07	12.4152
10419578	Ndrg2	N-myc downstream regulated gene 2	ENSMUSG00000004558	-1.02979	7.93125	-12.9837	2.72435e-08	5.20582e-06	9.6588
10588755	Camkv	CaM kinase-like vesicle-associated	ENSMUSG00000032936	-1.01636	7.37068	-17.9439	7.39877e-10	5.21336e-07	13.1509
10408359	Nrsn1	neurensin 1	ENSMUSG00000048978	-1.00169	9.41358	-15.159	4.91066e-09	1.58179e-06	11.3448
10349319	Sctr	secretin receptor	ENSMUSG00000026387	1.00147	9.53369	18.9445	4.00539e-10	4.9802e-07	13.721
10467153	Slc16a12	solute carrier family 16 (monocarboxylic acid transporters), member 12	ENSMUSG00000009378	0.977593	8.52058	17.1308	1.24793e-09	8.27595e-07	12.6589
10405355	Unc5a	unc-5 homolog A (C. elegans)	ENSMUSG00000025876	-0.963939	8.3406	-18.7814	4.41742e-10	4.9802e-07	13.6306
10385500	Irgm1	immunity-related GTPase family M member 1	ENSMUSG00000046879	0.962216	6.77411	19.015	3.84023e-10	4.9802e-07	13.7598
10373340	Rbms2	RNA binding motif, single stranded interacting protein 2	ENSMUSG00000040043	0.943831	7.91976	18.0187	7.0592e-10	5.21336e-07	13.1948
10394674	Socs2	suppressor of cytokine signaling 2	ENSMUSG00000020027	0.932559	9.79717	18.1162	6.64193e-10	5.21336e-07	13.2517
10404376	Agtr1a	angiotensin II receptor, type 1a	ENSMUSG00000049115	-0.922305	7.7451	-15.4704	3.91389e-09	1.47503e-06	11.5647
10416057	Clu	clusterin	ENSMUSG00000022037	-0.919058	7.91698	-9.42227	8.45534e-07	4.86355e-05	6.17862
10573008	Zfp827	zinc finger protein 827	ENSMUSG00000071064	0.91565	8.03328	15.7004	3.31893e-09	1.33634e-06	11.724
10514275	Ptplad2	protein tyrosine phosphatase-like A domain containing 2	ENSMUSG00000028497	-0.91106	6.74025	-13.6026	1.6324e-08	3.60857e-06	10.1671
10365833	Usp44	ubiquitin specific peptidase 44	ENSMUSG00000020020	-0.900338	6.8944	-12.6962	3.4817e-08	5.94738e-06	9.4142
10451721	Dazl	deleted in azoospermia-like	ENSMUSG00000010592	0.898299	6.59897	14.4015	8.68369e-09	2.3878e-06	10.7886
10455118	Pcdhb18	protocadherin beta 18	ENSMUSG00000048347	0.894143	6.88518	12.8031	3.17629e-08	5.53161e-06	9.50583
10543031	Slc25a13	solute carrier family 25 (mitochondrial carrier, adenine nucleotide translocator), member 13	ENSMUSG00000015112	-0.893563	6.42415	-14.6914	6.95983e-09	2.12068e-06	11.0051
10429222	Fam135b	family with sequence similarity 135, member B	ENSMUSG00000036800	0.891187	7.20461	9.01918	1.33007e-06	6.12123e-05	5.71282
10569017	Ifitm3	interferon induced transmembrane protein 3	ENSMUSG00000025492	0.881505	7.44804	8.66689	2.00193e-06	7.91922e-05	5.29146
10355474	2004-03-01	membrane-associated ring finger (C3HC4) 4	ENSMUSG00000039372	-0.869541	8.57081	-16.5836	1.79766e-09	9.2122e-07	12.3121
10483299	Scn1a	sodium channel, voltage-gated, type I, alpha	ENSMUSG00000064329	-0.869423	6.6049	-9.76671	5.81004e-07	3.83055e-05	6.56348
10376208	Gm2a	GM2 ganglioside activator protein	ENSMUSG00000000594	-0.868082	9.0752	-14.8116	6.35709e-09	1.99083e-06	11.0935
10406823	Gm2373	predicted gene 2373	NA	0.865875	9.44595	15.412	4.08278e-09	1.48481e-06	11.5238
10437205	Pcp4	Purkinje cell protein 4	ENSMUSG00000090223	-0.862338	9.98831	-16.85	1.50293e-09	8.66121e-07	12.4826
10346564	Casp8	caspase 8	ENSMUSG00000026029	0.849302	8.12491	10.4087	2.96757e-07	2.50807e-05	7.25021
10456046	Pdgfrb	platelet derived growth factor receptor, beta polypeptide	ENSMUSG00000024620	-0.847782	7.72267	-15.217	4.70584e-09	1.5604e-06	11.3862
10419147	Gm3676	predicted gene 3676	ENSMUSG00000090505	-0.843702	5.92006	-10.6384	2.35265e-07	2.19205e-05	7.48675
10455912	Isoc1	isochorismatase domain containing 1	ENSMUSG00000024601	-0.834872	10.194	-18.5365	5.12489e-10	5.17574e-07	13.493
10493203	0610031J06Rik	RIKEN cDNA 0610031J06 gene	ENSMUSG00000001418	-0.834775	9.59215	-15.2476	4.60186e-09	1.5604e-06	11.4078
10373756	Pla2g3	phospholipase A2, group III	ENSMUSG00000034579	-0.831246	7.53406	-11.7033	8.44441e-08	1.12003e-05	8.52496
10359713	Sft2d2	SFT2 domain containing 2	ENSMUSG00000040848	0.826205	8.6241	10.4862	2.74257e-07	2.43463e-05	7.33058
10423825	Fzd6	frizzled homolog 6 (Drosophila)	ENSMUSG00000022297	-0.821658	8.8541	-11.1425	1.43369e-07	1.58465e-05	7.98981
10453544	Mettl4	methyltransferase like 4	ENSMUSG00000055660	0.821557	7.62644	9.41762	8.49892e-07	4.8638e-05	6.17334
10484389	Tfpi	tissue factor pathway inhibitor	ENSMUSG00000027082	-0.820941	8.55569	-12.5331	4.00996e-08	6.52242e-06	9.27301
10410287	Zfp458	zinc finger protein 458	ENSMUSG00000055480	0.817336	9.4564	12.4616	4.2684e-08	6.70178e-06	9.2105
10483131	Kcnh7	potassium voltage-gated channel, subfamily H (eag-related), member 7	ENSMUSG00000059742	-0.816206	6.42263	-12.6473	3.63168e-08	6.11098e-06	9.37207
10450982	Gpr115	G protein-coupled receptor 115	ENSMUSG00000023918	0.814737	8.37336	9.67629	6.40486e-07	4.10275e-05	6.46359
10559297	Slc22a18	solute carrier family 22 (organic cation transporter), member 18	ENSMUSG00000000154	0.808725	8.48766	13.1543	2.3607e-08	4.8077e-06	9.80133
10363921	Pcdh15	protocadherin 15	ENSMUSG00000052613	-0.807897	6.38603	-7.59638	7.51683e-06	0.000187075	3.92323
10579052	Gm10033	predicted gene 10033	NA	0.803607	8.15099	10.9545	1.72064e-07	1.7635e-05	7.80476
10565775	Dgat2	diacylglycerol O-acyltransferase 2	ENSMUSG00000030747	-0.798811	9.00485	-9.29635	9.72462e-07	5.22073e-05	6.03494
10500808	Olfml3	olfactomedin-like 3	ENSMUSG00000027848	-0.796381	9.03905	-9.46887	8.03174e-07	4.74822e-05	6.23139
10584236	Pate2	prostate and testis expressed 2	ENSMUSG00000074452	0.790613	6.77945	8.40487	2.73578e-06	9.73808e-05	4.96909
10495416	Vav3	vav 3 oncogene	ENSMUSG00000033721	-0.785085	6.64516	-14.4849	8.14466e-09	2.35443e-06	10.8514
10355105	Eef1b2	eukaryotic translation elongation factor 1 beta 2	ENSMUSG00000025967	-0.78336	7.40563	-4.36456	0.000982656	0.00559236	-1.12444
10428089	Nipal2	NIPA-like domain containing 2	ENSMUSG00000038879	-0.778965	7.52423	-9.14578	1.15176e-06	5.63411e-05	5.86095
10445308	Cyp39a1	cytochrome P450, family 39, subfamily a, polypeptide 1	ENSMUSG00000023963	0.776092	6.78727	5.5529	0.000138673	0.00135125	0.897981
10432492	Faim2	Fas apoptotic inhibitory molecule 2	ENSMUSG00000023011	-0.775654	9.70198	-9.85026	5.31304e-07	3.65239e-05	6.65507
10455942	A730017C20Rik	RIKEN cDNA A730017C20 gene	ENSMUSG00000050875	-0.766506	6.86788	-8.29171	3.13786e-06	0.000104278	4.82741
10510215	Gm13139	predicted gene 13139	ENSMUSG00000067916	-0.760987	5.75644	-5.56915	0.000135195	0.00132308	0.924317
10361358	Rgs17	regulator of G-protein signaling 17	ENSMUSG00000019775	0.760515	7.7125	12.2856	4.98439e-08	7.49254e-06	9.05513
10601360	Atp7a	ATPase, Cu++ transporting, alpha polypeptide	ENSMUSG00000033792	-0.758683	8.48202	-12.3099	4.87841e-08	7.43232e-06	9.07668
10404069	Hist1h1a	histone cluster 1, H1a	ENSMUSG00000049539	0.756593	10.2121	9.61483	6.84641e-07	4.25788e-05	6.39523
10454198	Rnf125	ring finger protein 125	ENSMUSG00000033107	0.752659	8.27087	10.1724	3.78501e-07	2.87635e-05	7.00189
10498273	Tm4sf1	transmembrane 4 superfamily member 1	ENSMUSG00000027800	-0.750968	6.10981	-10.2103	3.63901e-07	2.82939e-05	7.04207
10540333	Cntn6	contactin 6	ENSMUSG00000030092	-0.741757	5.66631	-4.34346	0.00101916	0.00574024	-1.1619
10370833	Uqcr11	ubiquinol-cytochrome c reductase, complex III subunit XI	ENSMUSG00000020163	-0.738761	9.81839	-13.9306	1.25484e-08	3.04803e-06	10.4268
10369752	Lrrtm3	leucine rich repeat transmembrane neuronal 3	ENSMUSG00000042846	-0.738196	6.7916	-8.10535	3.94466e-06	0.000121718	4.59083
10513776	Astn2	astrotactin 2	ENSMUSG00000028373	0.737666	8.33652	11.1764	1.38765e-07	1.56443e-05	8.02289
10391762	Gjc1	gap junction protein, gamma 1	ENSMUSG00000034520	0.734468	6.8927	8.8575	1.60215e-06	6.91619e-05	5.52113
10525419	P2rx7	purinergic receptor P2X, ligand-gated ion channel, 7	ENSMUSG00000029468	-0.732423	9.54638	-16.7534	1.60323e-09	8.66121e-07	12.4211
10598493	Pcsk1n	proprotein convertase subtilisin/kexin type 1 inhibitor	ENSMUSG00000039278	-0.728215	9.7951	-13.0376	2.60325e-08	5.06019e-06	9.70406
10347781	Nyap2	neuronal tyrosine-phophorylated phosphoinositide 3-kinase adaptor 2	ENSMUSG00000054976	0.728129	7.19007	12.4585	4.28001e-08	6.70178e-06	9.20779
10366346	Phlda1	pleckstrin homology-like domain, family A, member 1	ENSMUSG00000020205	-0.725209	7.67408	-9.99268	4.56824e-07	3.2922e-05	6.80964
10436590	2810055G20Rik	RIKEN cDNA 2810055G20 gene	ENSMUSG00000090386	-0.718472	4.97522	-4.16591	0.00138836	0.00716681	-1.47891
10512949	Abca1	ATP-binding cassette, sub-family A (ABC1), member 1	ENSMUSG00000015243	-0.715518	8.27414	-15.303	4.41941e-09	1.55701e-06	11.4471
10369792	Arid5b	AT rich interactive domain 5B (MRF1-like)	ENSMUSG00000019947	-0.715399	7.85756	-8.67159	1.99087e-06	7.9032e-05	5.29717
10574427	Impdh2	inosine 5'-phosphate dehydrogenase 2	ENSMUSG00000062867	0.7132	6.9281	3.21207	0.00771253	0.0267841	-3.21719
10484856	Olfr1259	olfactory receptor 1259	ENSMUSG00000068806	0.712118	6.47755	6.55908	3.08125e-05	0.000460716	2.45933
10601503	Dach2	dachshund 2 (Drosophila)	ENSMUSG00000025592	-0.710467	5.93686	-5.55084	0.000139121	0.00135328	0.894635
10427336	Nckap1l	NCK associated protein 1 like	ENSMUSG00000022488	0.709469	8.1512	16.0918	2.51954e-09	1.13621e-06	11.9892
10501229	Gstm1	glutathione S-transferase, mu 1	ENSMUSG00000058135	-0.708474	8.24929	-10.502	2.69899e-07	2.41495e-05	7.3469
10455092	Pcdhb12	protocadherin beta 12	ENSMUSG00000043458	0.708077	7.02349	8.8607	1.59622e-06	6.91619e-05	5.52494
10607437	Magea3	melanoma antigen, family A, 3	ENSMUSG00000094196	-0.706856	5.39365	-9.67985	6.38022e-07	4.10275e-05	6.46754
10411611	Naip5	NLR family, apoptosis inhibitory protein 5	ENSMUSG00000071203	0.706505	8.92364	11.5094	1.01149e-07	1.26707e-05	8.34277
10440513	Cyyr1	cysteine and tyrosine-rich protein 1	ENSMUSG00000041134	-0.706195	7.52812	-8.06868	4.12818e-06	0.00012566	4.54379
10586920	Rfx7	regulatory factor X, 7	ENSMUSG00000037674	0.705822	8.6437	11.3331	1.1946e-07	1.40629e-05	8.17456
10437590	Carhsp1	calcium regulated heat stable protein 1	ENSMUSG00000008393	-0.702338	8.80244	-10.4304	2.90253e-07	2.47903e-05	7.2728
10346843	Nrp2	neuropilin 2	ENSMUSG00000025969	-0.700224	9.3076	-12.8554	3.03765e-08	5.52363e-06	9.55034
10574899	Nutf2	nuclear transport factor 2	c("ENSMUSG00000008450", "ENSMUSG00000071497")	0.699424	10.0134	11.8165	7.60851e-08	1.02117e-05	8.63002
10546510	Lrig1	leucine-rich repeats and immunoglobulin-like domains 1	ENSMUSG00000030029	0.69815	8.80558	13.2865	2.11495e-08	4.41555e-06	9.91051
10399892	Gpr22	G protein-coupled receptor 22	ENSMUSG00000044067	-0.697214	6.8874	-10.6634	2.29444e-07	2.17374e-05	7.51225
10404033	Hist1h1d	histone cluster 1, H1d	ENSMUSG00000052565	0.696887	6.68483	9.26378	1.00854e-06	5.27524e-05	5.9975
10467013	Prkg1	protein kinase, cGMP-dependent, type I	ENSMUSG00000052920	-0.693761	7.4843	-10.0575	4.26715e-07	3.12935e-05	6.87937
10394353	0610009D07Rik	RIKEN cDNA 0610009D07 gene	ENSMUSG00000037361	-0.693757	8.4598	-8.73278	1.85278e-06	7.48684e-05	5.37131
10429220	Fam135b	family with sequence similarity 135, member B	ENSMUSG00000036800	0.691638	7.37542	8.73469	1.84865e-06	7.48684e-05	5.37361
10401028	Sgpp1	sphingosine-1-phosphate phosphatase 1	ENSMUSG00000021054	0.691543	11.3644	13.9148	1.27069e-08	3.04803e-06	10.4144
10361186	Sertad4	SERTA domain containing 4	ENSMUSG00000016262	-0.690165	7.96585	-10.0592	4.25944e-07	3.12935e-05	6.88121
10563441	Emp3	epithelial membrane protein 3	ENSMUSG00000040212	-0.689879	8.3966	-10.7409	2.12397e-07	2.02929e-05	7.59079
10541998	Akap3	A kinase (PRKA) anchor protein 3	ENSMUSG00000030344	0.689805	7.90748	10.9315	1.75986e-07	1.78745e-05	7.78187
10511333	Plag1	pleiomorphic adenoma gene 1	ENSMUSG00000003282	0.689144	6.52044	6.58432	2.9724e-05	0.000452238	2.49667
10604111	Rhox1	reproductive homeobox 1	ENSMUSG00000071773	0.68724	9.13385	15.8268	3.03426e-09	1.26697e-06	11.8104
10408600	Serpinb6a	serine (or cysteine) peptidase inhibitor, clade B, member 6a	ENSMUSG00000060147	0.687104	6.92212	9.94528	4.80282e-07	3.36317e-05	6.75841
10382341	Sstr2	somatostatin receptor 2	ENSMUSG00000047904	-0.685113	8.41668	-12.9167	2.88322e-08	5.32876e-06	9.60235
10437846	Ifitm7	interferon induced transmembrane protein 7	ENSMUSG00000065968	-0.685065	7.12075	-7.03144	1.5938e-05	0.000304035	3.14373
10584674	Mcam	melanoma cell adhesion molecule	ENSMUSG00000032135	0.679038	9.23579	13.6173	1.61314e-08	3.60857e-06	10.1788
10404059	Hist1h1c	histone cluster 1, H1c	ENSMUSG00000036181	0.67744	9.275	10.4042	2.98103e-07	2.50807e-05	7.24559
10586168	Snord16a	small nucleolar RNA, C/D box 16A	NA	0.675286	11.636	13.4503	1.84803e-08	3.93592e-06	10.0443
10540248	Mitf	microphthalmia-associated transcription factor	ENSMUSG00000035158	-0.674653	7.43457	-10.6097	2.42145e-07	2.23766e-05	7.45741
10469289	Il15ra	interleukin 15 receptor, alpha chain	ENSMUSG00000023206	0.672234	7.40211	10.7771	2.04898e-07	2.00871e-05	7.62733
10388430	Serpinf1	serine (or cysteine) peptidase inhibitor, clade F, member 1	ENSMUSG00000000753	-0.666542	8.83598	-10.6529	2.31881e-07	2.17852e-05	7.5015
10603533	Ssxb3	synovial sarcoma, X member B, breakpoint 3	ENSMUSG00000079701	0.666278	6.90895	8.59196	2.18736e-06	8.53299e-05	5.20006
10455098	Pcdhb14	protocadherin beta 14	ENSMUSG00000044043	0.665834	6.61621	7.53044	8.1897e-06	0.000198989	3.83437
10587655	Zfp949	zinc finger protein 949	ENSMUSG00000032425	0.66413	6.91934	9.10583	1.20508e-06	5.75681e-05	5.81439
10488617	Nrsn2	neurensin 2	ENSMUSG00000059361	-0.659136	8.58125	-12.1325	5.71324e-08	8.47514e-06	8.91817
10455094	Pcdhb13	protocadherin beta 13	ENSMUSG00000047307	0.658746	6.82673	5.79446	9.54108e-05	0.00102189	1.28584
10437023	Morc3	microrchidia 3	ENSMUSG00000039456	0.658162	10.1103	13.7782	1.41694e-08	3.32803e-06	10.307
10545198	Igkv4-59	immunoglobulin kappa variable 4-59	NA	-0.657462	7.12746	-7.16956	1.32147e-05	0.000268198	3.33817
10467175	A830019P07Rik	RIKEN cDNA A830019P07 gene	NA	0.656339	8.82067	11.3383	1.18875e-07	1.40629e-05	8.17953
10391286	Stat5b	signal transducer and activator of transcription 5B	ENSMUSG00000020919	-0.65523	7.37028	-8.69456	1.93777e-06	7.71959e-05	5.32505
10493664	Nup210l	nucleoporin 210-like	ENSMUSG00000027939	0.655158	6.23103	7.29798	1.11256e-05	0.000239371	3.51668
10490384	Lama5	laminin, alpha 5	ENSMUSG00000015647	0.654765	7.97345	14.561	7.68446e-09	2.27986e-06	10.9083
10368289	Enpp1	ectonucleotide pyrophosphatase/phosphodiesterase 1	ENSMUSG00000037370	-0.654758	10.5815	-11.0321	1.59536e-07	1.6968e-05	7.88147
10355806	Tuba4a	tubulin, alpha 4A	ENSMUSG00000026202	-0.654541	7.37241	-5.06791	0.000301182	0.00233691	0.094741
10462922	Plce1	phospholipase C, epsilon 1	ENSMUSG00000024998	0.653525	8.25727	10.7612	2.08146e-07	2.02296e-05	7.61134
10592140	Ddx25	DEAD (Asp-Glu-Ala-Asp) box polypeptide 25	ENSMUSG00000032101	0.653183	8.64564	11.5786	9.48136e-08	1.21201e-05	8.4081
10400405	Nfkbia	nuclear factor of kappa light polypeptide gene enhancer in B cells inhibitor, alpha	ENSMUSG00000021025	0.652411	9.22121	10.3331	3.206e-07	2.61405e-05	7.17138
10462005	Tmem2	transmembrane protein 2	ENSMUSG00000024754	-0.65137	9.34326	-15.4665	3.92504e-09	1.47503e-06	11.562
10601447	Fam46d	family with sequence similarity 46, member D	ENSMUSG00000073007	0.647247	6.25206	5.74715	0.000102595	0.00107796	1.21052
10502359	Dapp1	dual adaptor for phosphotyrosine and 3-phosphoinositides 1	ENSMUSG00000028159	-0.645951	6.86392	-9.11227	1.19631e-06	5.73923e-05	5.8219
10463005	Cyp2c55	cytochrome P450, family 2, subfamily c, polypeptide 55	ENSMUSG00000025002	0.645566	8.39195	10.9579	1.71504e-07	1.7635e-05	7.80806
10455071	Pcdhb7	protocadherin beta 7	ENSMUSG00000045062	0.645561	7.15483	7.61641	7.32431e-06	0.000183092	3.95011
10579049	Gm10033	predicted gene 10033	NA	0.642081	8.92886	11.1617	1.40742e-07	1.57102e-05	8.00855
10405918	Rsl1	regulator of sex limited protein 1	ENSMUSG00000058900	0.641785	8.94579	10.2451	3.51005e-07	2.76729e-05	7.07891
10475946	Zc3h6	zinc finger CCCH type containing 6	ENSMUSG00000042851	0.639794	7.66161	10.4351	2.88872e-07	2.47903e-05	7.27766
10405911	Zfp759	zinc finger protein 759	ENSMUSG00000057396	0.63746	7.49063	8.54397	2.31576e-06	8.80451e-05	5.14119
10435791	Mir568	microRNA 568	ENSMUSG00000076372	0.636244	7.47669	7.41938	9.47293e-06	0.000218795	3.68346
10392135	Gh	growth hormone	ENSMUSG00000020713	0.63581	8.91365	11.0174	1.61832e-07	1.70513e-05	7.86697
10455088	Pcdhb11	protocadherin beta 11	ENSMUSG00000051486	0.632225	7.32853	8.31333	3.0564e-06	0.000102952	4.85459
10467979	Scd1	stearoyl-Coenzyme A desaturase 1	ENSMUSG00000037071	-0.629992	5.94397	-5.17544	0.000252877	0.00207492	0.275595
10526838	Got2	glutamate oxaloacetate transaminase 2, mitochondrial	ENSMUSG00000031672	-0.629832	10.1867	-4.18406	0.00134492	0.0070043	-1.44636
10347650	Asic4	acid-sensing (proton-gated) ion channel family member 4	ENSMUSG00000033007	-0.629414	8.97441	-12.1155	5.8014e-08	8.49415e-06	8.90279
10383717	Inpp5j	inositol polyphosphate 5-phosphatase J	ENSMUSG00000034570	-0.629302	7.92998	-10.45	2.84539e-07	2.47157e-05	7.29307
10354374	Slc40a1	solute carrier family 40 (iron-regulated transporter), member 1	ENSMUSG00000025993	0.627601	6.44811	6.48517	3.42506e-05	0.000494419	2.34947
10456021	Camk2a	calcium/calmodulin-dependent protein kinase II alpha	ENSMUSG00000024617	-0.627251	8.10393	-9.57686	7.13543e-07	4.372e-05	6.35282
10604347	Smarca1	SWI/SNF related, matrix associated, actin dependent regulator of chromatin, subfamily a, member 1	ENSMUSG00000031099	0.626209	5.53746	7.05006	1.55383e-05	0.00029945	3.17009
10518763	Slc45a1	solute carrier family 45, member 1	ENSMUSG00000039838	-0.622995	7.38751	-10.5404	2.59635e-07	2.3417e-05	7.3864
10502816	Gipc2	GIPC PDZ domain containing family, member 2	ENSMUSG00000039131	-0.621186	7.04868	-8.47255	2.52201e-06	9.17505e-05	5.05311
10372410	Glipr1	GLI pathogenesis-related 1 (glioma)	ENSMUSG00000056888	0.620107	7.95637	8.31259	3.05915e-06	0.000102952	4.85366
10442231	3110052M02Rik	RIKEN cDNA 3110052M02 gene	ENSMUSG00000035868	0.619421	7.37161	13.0636	2.54702e-08	5.03774e-06	9.72579
10575750	Bcmo1	beta-carotene 15,15'-monooxygenase	ENSMUSG00000031845	-0.619197	7.1775	-11.3728	1.15045e-07	1.39571e-05	8.21265
10470412	Dbh	dopamine beta hydroxylase	ENSMUSG00000000889	0.617213	7.78583	8.48131	2.4957e-06	9.17505e-05	5.06394
10424349	Sqle	squalene epoxidase	ENSMUSG00000022351	-0.616922	10.8705	-13.6605	1.55776e-08	3.58411e-06	10.2134
10531415	Cxcl10	chemokine (C-X-C motif) ligand 10	ENSMUSG00000034855	0.616584	6.51866	5.41193	0.000173147	0.00159249	0.66784
10359826	Uqcr11	ubiquinol-cytochrome c reductase, complex III subunit XI	ENSMUSG00000020163	-0.614773	9.23997	-6.84273	2.06681e-05	0.000355745	2.87396
10455123	Pcdhb19	protocadherin beta 19	ENSMUSG00000043313	0.614626	6.5917	7.47948	8.75377e-06	0.000206033	3.76532
10534168	Auts2	autism susceptibility candidate 2	ENSMUSG00000029673	-0.613203	9.29119	-8.76501	1.78421e-06	7.31463e-05	5.41019
10495613	4833424O15Rik	RIKEN cDNA 4833424O15 gene	ENSMUSG00000033342	-0.612945	8.71408	-8.02064	4.38262e-06	0.000129853	4.48191
10562651	9830147E19Rik	RIKEN cDNA 9830147E19 gene	ENSMUSG00000074158	0.612447	6.11418	9.25775	1.01537e-06	5.27524e-05	5.99056
10442250	Zfp229	zinc finger protein 229	ENSMUSG00000061544	0.612228	6.88311	7.38351	9.93204e-06	0.00022433	3.63438
10455061	Pcdhb4	protocadherin beta 4	ENSMUSG00000045689	0.609246	7.42358	9.01261	1.3401e-06	6.14159e-05	5.70508
10405185	Cks2	CDC28 protein kinase regulatory subunit 2	ENSMUSG00000062248	-0.608201	9.10857	-14.1749	1.03523e-08	2.65255e-06	10.6161
10426751	Tmbim6	transmembrane BAX inhibitor motif containing 6	ENSMUSG00000023010	-0.606769	11.1145	-13.9754	1.21109e-08	3.03418e-06	10.4618
10493660	Nup210l	nucleoporin 210-like	ENSMUSG00000027939	0.605401	5.28721	5.60621	0.000127598	0.00126521	0.984285
10497752	Carhsp1	calcium regulated heat stable protein 1	ENSMUSG00000008393	-0.605278	9.51544	-7.71075	6.48609e-06	0.000169269	4.07604
10583314	Taf1d	TATA box binding protein (Tbp)-associated factor, RNA polymerase I, D	ENSMUSG00000031939	0.604092	11.9546	10.3353	3.19876e-07	2.61405e-05	7.17369
10538590	Herc6	hect domain and RLD 6	ENSMUSG00000029798	0.598779	6.51349	7.37691	1.0019e-05	0.000224562	3.62534
10398362	AF357355	snoRNA AF357355	ENSMUSG00000064621	-0.598324	7.6067	-8.72957	1.85976e-06	7.48819e-05	5.36743
10552964	Ftl1	ferritin light chain 1	c("ENSMUSG00000050708", "ENSMUSG00000062382")	-0.597609	10.4625	-6.48557	3.42311e-05	0.000494419	2.35007
10542959	Bet1	blocked early in transport 1 homolog (S. cerevisiae)	ENSMUSG00000032757	0.597197	8.37769	6.62871	2.7908e-05	0.000429902	2.56214
10439780	6430553K19Rik	RIKEN cDNA 6430553K19 gene	NA	0.59594	5.59469	6.09167	6.09056e-05	0.000735959	1.75175
10480090	Itga8	integrin alpha 8	ENSMUSG00000026768	-0.595218	6.6167	-7.91704	4.99026e-06	0.000142792	4.34754
10495243	Gstm5	glutathione S-transferase, mu 5	ENSMUSG00000004032	-0.59506	9.28655	-9.40053	8.66111e-07	4.88227e-05	6.15393
10405927	Zfp455	zinc finger protein 455	ENSMUSG00000051037	0.594687	7.31453	4.94049	0.00037128	0.00272691	-0.121557
10390746	Top2a	topoisomerase (DNA) II alpha	ENSMUSG00000020914	-0.594355	7.28429	-3.66919	0.00335853	0.0139002	-2.37945
10364650	Hmha1	histocompatibility (minor) HA-1	ENSMUSG00000035697	0.592196	8.39322	10.4761	2.77093e-07	2.44058e-05	7.3201
10497505	Nlgn1	neuroligin 1	ENSMUSG00000063887	-0.591498	5.91576	-6.76001	2.31956e-05	0.00038232	2.75418
10423836	Cthrc1	collagen triple helix repeat containing 1	ENSMUSG00000054196	-0.590933	10.5573	-9.46445	8.07095e-07	4.74822e-05	6.22639
10445867	Plcl2	phospholipase C-like 2	ENSMUSG00000038910	0.590055	9.18726	11.0736	1.53234e-07	1.67724e-05	7.92235
10424779	Cks2	CDC28 protein kinase regulatory subunit 2	ENSMUSG00000062248	-0.589726	9.34161	-14.2988	9.40091e-09	2.52347e-06	10.7108
10431140	1810041L15Rik	RIKEN cDNA 1810041L15 gene	ENSMUSG00000062760	-0.588797	8.94851	-10.5902	2.4692e-07	2.26323e-05	7.43753
10556082	Ppfibp2	PTPRF interacting protein, binding protein 2 (liprin beta 2)	ENSMUSG00000036528	0.586473	10.4935	10.9959	1.65247e-07	1.725e-05	7.84578
10425116	Cdc42ep1	CDC42 effector protein (Rho GTPase binding) 1	ENSMUSG00000049521	-0.585969	8.16169	-9.14374	1.15441e-06	5.63411e-05	5.85858
10352459	Rab3gap2	RAB3 GTPase activating protein subunit 2	ENSMUSG00000039318	-0.585879	8.87163	-11.0358	1.58954e-07	1.6968e-05	7.88518
10463836	Gsto1	glutathione S-transferase omega 1	ENSMUSG00000025068	-0.584269	6.61475	-8.06732	4.13516e-06	0.00012566	4.54204
10590801	Birc3	baculoviral IAP repeat-containing 3	ENSMUSG00000032000	0.583263	7.15159	9.85247	5.30055e-07	3.65239e-05	6.65748
10508651	Sdc3	syndecan 3	ENSMUSG00000025743	-0.583137	8.43692	-10.328	3.22293e-07	2.61405e-05	7.16601
10578619	Cdkn2aip	CDKN2A interacting protein	ENSMUSG00000038069	0.582419	9.22611	12.8322	3.09823e-08	5.53161e-06	9.53065
10409866	Ctla2b	cytotoxic T lymphocyte-associated protein 2 beta	ENSMUSG00000074874	-0.581999	7.42128	-9.56527	7.22628e-07	4.40373e-05	6.33984
10353004	Cks2	CDC28 protein kinase regulatory subunit 2	ENSMUSG00000062248	-0.581312	9.20035	-13.1405	2.38807e-08	4.8077e-06	9.78987
10345442	Hs6st1	heparan sulfate 6-O-sulfotransferase 1	ENSMUSG00000045216	-0.581072	9.97263	-9.47872	7.94518e-07	4.73936e-05	6.24251
10604982	Pnma5	paraneoplastic antigen family 5	ENSMUSG00000050424	0.580989	8.22611	8.48834	2.47478e-06	9.14776e-05	5.07263
10594426	Zwilch	zwilch kinetochore protein	ENSMUSG00000032400	0.580051	8.80774	8.38964	2.78651e-06	9.848e-05	4.95011
10574350	Mmp15	matrix metallopeptidase 15	ENSMUSG00000031790	0.576383	8.55739	6.51058	3.30246e-05	0.000481656	2.38733
10593497	Zc3h12c	zinc finger CCCH type containing 12C	ENSMUSG00000035164	0.575666	7.77213	8.57755	2.22507e-06	8.59837e-05	5.18242
10572727	Zfp882	zinc finger protein 882	ENSMUSG00000089857	0.57493	8.08848	8.75308	1.80927e-06	7.39045e-05	5.39581
10455128	Pcdhb20	protocadherin beta 20	ENSMUSG00000046191	0.574892	6.78888	8.47647	2.51022e-06	9.17505e-05	5.05795
10587503	Sh3bgrl2	SH3 domain binding glutamic acid-rich protein like 2	ENSMUSG00000032261	0.57466	7.33554	7.36191	1.022e-05	0.000226183	3.60475
10416215	Loxl2	lysyl oxidase-like 2	ENSMUSG00000034205	0.574195	8.62053	7.63861	7.11718e-06	0.000181127	3.97984
10490203	Gnas	GNAS (guanine nucleotide binding protein, alpha stimulating) complex locus	ENSMUSG00000027523	-0.573517	9.97967	-3.15122	0.00862207	0.0292171	-3.3286
10596279	Dnajc13	DnaJ (Hsp40) homolog, subfamily C, member 13	ENSMUSG00000032560	0.5708	6.88366	4.3783	0.000959618	0.00550292	-1.10007
10533145	Tpcn1	two pore channel 1	ENSMUSG00000032741	-0.570537	8.60984	-9.82438	5.46192e-07	3.7095e-05	6.62677
10425852	Parvb	parvin, beta	ENSMUSG00000022438	-0.570323	8.63721	-7.84468	5.46789e-06	0.000151504	4.2529
10462623	Ifit1	interferon-induced protein with tetratricopeptide repeats 1	ENSMUSG00000034459	0.569255	5.78538	7.24504	1.19405e-05	0.000251152	3.44336
10454441	Syt4	synaptotagmin IV	ENSMUSG00000024261	-0.568322	7.12801	-5.50676	0.000149079	0.00142349	0.822959
10389894	Abcc3	ATP-binding cassette, sub-family C (CFTR/MRP), member 3	ENSMUSG00000020865	-0.567768	8.98188	-12.5218	4.04975e-08	6.52242e-06	9.26313
10347734	Sgpp2	sphingosine-1-phosphate phosphotase 2	ENSMUSG00000032908	-0.567382	9.0791	-12.0704	6.04141e-08	8.62162e-06	8.86207
10552796	Tsks	testis-specific serine kinase substrate	ENSMUSG00000059891	-0.567337	7.58172	-8.01749	4.39985e-06	0.000129853	4.47785
10368508	Cenpw	centromere protein W	ENSMUSG00000075266	0.564676	7.84102	4.09779	0.00156472	0.00778149	-1.60131
10589099	Ip6k2	inositol hexaphosphate kinase 2	ENSMUSG00000032599	0.564099	9.09243	8.91826	1.49346e-06	6.68147e-05	5.5935
10346150	Tmeff2	transmembrane protein with EGF-like and two follistatin-like domains 2	ENSMUSG00000026109	-0.563704	8.95466	-9.6409	6.65526e-07	4.1917e-05	6.42427
10463016	Cyp2c65	cytochrome P450, family 2, subfamily c, polypeptide 65	ENSMUSG00000067231	0.563702	4.84616	3.2027	0.00784603	0.0271435	-3.23436
10411709	Cdk7	cyclin-dependent kinase 7	ENSMUSG00000069089	0.561294	7.3551	9.06411	1.26361e-06	5.88673e-05	5.76558
10387816	Rnasek	ribonuclease, RNase K	c("ENSMUSG00000093989", "ENSMUSG00000040904")	-0.56039	9.64977	-9.65399	6.56142e-07	4.1574e-05	6.43883
10377537	Chd3	chromodomain helicase DNA binding protein 3	ENSMUSG00000018474	-0.560201	7.20581	-7.13569	1.38331e-05	0.00027849	3.29072
10563570	Tph1	tryptophan hydroxylase 1	ENSMUSG00000040046	0.559948	6.98932	10.8417	1.92215e-07	1.90091e-05	7.69228
10586591	Car12	carbonic anyhydrase 12	ENSMUSG00000032373	0.558318	9.23615	9.44824	8.21635e-07	4.77034e-05	6.20806
10594911	Tex9	testis expressed gene 9	ENSMUSG00000090626	0.558302	7.312	8.87756	1.56536e-06	6.84025e-05	5.54506
10399588	Zfp125	zinc finger protein 125	NA	0.556367	6.47373	4.72031	0.000535833	0.0035619	-0.500262
10565627	Aqp11	aquaporin 11	ENSMUSG00000042797	-0.555593	7.77802	-6.73829	2.39127e-05	0.000391048	2.72256
10498284	Wwtr1	WW domain containing transcription regulator 1	ENSMUSG00000027803	-0.554914	7.81702	-7.76046	6.08632e-06	0.000162215	4.14194
10566723	Lmo1	LIM domain only 1	ENSMUSG00000036111	0.553744	9.05401	10.269	3.42473e-07	2.73833e-05	7.10403
10592201	Chek1	checkpoint kinase 1	ENSMUSG00000032113	0.552282	8.67964	5.69513	0.000111158	0.00114135	1.12735
10455108	Pcdhb16	protocadherin beta 16	ENSMUSG00000047910	0.550805	6.88887	7.50872	8.42522e-06	0.000201205	3.80498
10476588	Macrod2	MACRO domain containing 2	ENSMUSG00000068205	0.549893	5.9625	7.24807	1.18923e-05	0.000250755	3.44756
10433055	Mir688	microRNA 688	ENSMUSG00000076009	-0.548172	7.79885	-6.81345	2.15275e-05	0.000367069	2.83166
10488982	Cpne1	copine I	ENSMUSG00000074643	0.546393	8.56464	11.0464	1.57337e-07	1.6968e-05	7.89555
10379996	Mir301	microRNA 301	NA	0.545699	5.2117	4.86363	0.00042169	0.00300789	-0.253061
10406968	Cenpk	centromere protein K	ENSMUSG00000021714	0.544782	8.38435	5.90497	8.06291e-05	0.000908104	1.46053
10523161	Mthfd2l	methylenetetrahydrofolate dehydrogenase (NADP+ dependent) 2-like	ENSMUSG00000029376	0.543593	7.79249	9.26548	1.00661e-06	5.27524e-05	5.99946
10449893	Rasal3	RAS protein activator like 3	ENSMUSG00000052142	-0.542817	8.35579	-9.96622	4.69764e-07	3.33334e-05	6.78107
10361682	Ppil4	peptidylprolyl isomerase (cyclophilin)-like 4	ENSMUSG00000015757	0.542622	9.64198	11.5688	9.5679e-08	1.21201e-05	8.39892
10584309	Msantd2	Myb/SANT-like DNA-binding domain containing 2	ENSMUSG00000042138	0.541562	8.4816	12.0412	6.20214e-08	8.74036e-06	8.83568
10399391	Gen1	Gen homolog 1, endonuclease (Drosophila)	ENSMUSG00000051235	0.541316	8.6982	9.52742	7.53164e-07	4.56155e-05	6.29738
10473503	Olfr1052	olfactory receptor 1052	ENSMUSG00000047149	-0.541195	5.51368	-5.75546	0.000101292	0.00106726	1.22377
10527148	Slc29a4	solute carrier family 29 (nucleoside transporters), member 4	ENSMUSG00000050822	-0.540414	9.59124	-11.372	1.15133e-07	1.39571e-05	8.21188
10558458	Ppp2r2d	protein phosphatase 2, regulatory subunit B, delta	ENSMUSG00000041769	0.540269	9.54029	9.92406	4.91204e-07	3.41841e-05	6.7354
10521907	Smim20	small integral membrane protein 20	ENSMUSG00000061461	-0.540139	8.84966	-9.32447	9.42444e-07	5.15967e-05	6.06716
10476314	Prnp	prion protein	ENSMUSG00000079037	-0.540032	10.2385	-7.90162	5.08813e-06	0.000144858	4.32743
10409857	4930486L24Rik	RIKEN cDNA 4930486L24 gene	ENSMUSG00000050345	-0.539411	6.7172	-7.09119	1.46927e-05	0.000288581	3.22816
10455784	Gramd3	GRAM domain containing 3	ENSMUSG00000001700	-0.537891	8.43155	-9.27398	9.97093e-07	5.27524e-05	6.00923
10587241	Hmgcll1	3-hydroxymethyl-3-methylglutaryl-Coenzyme A lyase-like 1	ENSMUSG00000007908	0.537359	8.45514	7.31143	1.09282e-05	0.000235932	3.53525
10410947	Xrcc4	X-ray repair complementing defective repair in Chinese hamster cells 4	ENSMUSG00000021615	0.535557	8.88994	9.79901	5.61221e-07	3.76619e-05	6.59897
10502890	St6galnac3	ST6 (alpha-N-acetyl-neuraminyl-2,3-beta-galactosyl-1,3)-N-acetylgalactosaminide alpha-2,6-sialyltransferase 3	ENSMUSG00000052544	-0.535269	8.85167	-7.31028	1.09449e-05	0.000235932	3.53367
10568529	Ikzf5	IKAROS family zinc finger 5	ENSMUSG00000040167	0.534676	7.88834	6.48725	3.41484e-05	0.000494209	2.35258
10554900	Dlg2	discs, large homolog 2 (Drosophila)	ENSMUSG00000052572	-0.534344	9.58956	-12.5736	3.87116e-08	6.41816e-06	9.30824
10430825	Cenpm	centromere protein M	ENSMUSG00000068101	-0.533298	9.25844	-11.8331	7.49338e-08	1.01784e-05	8.64538
10346330	Plcl1	phospholipase C-like 1	ENSMUSG00000038349	0.532504	7.42895	7.01555	1.62878e-05	0.000307586	3.12119
10417167	Clybl	citrate lyase beta like	ENSMUSG00000025545	-0.532192	8.67029	-7.78344	5.91046e-06	0.000158654	4.17231
10397482	Tmem63c	transmembrane protein 63c	ENSMUSG00000034145	0.531845	9.30126	9.26336	1.00901e-06	5.27524e-05	5.99701
10456005	Cd74	CD74 antigen (invariant polypeptide of major histocompatibility complex, class II antigen-associated)	ENSMUSG00000024610	0.53118	8.93521	7.19647	1.27447e-05	0.000261243	3.37574
10607433	Magea3	melanoma antigen, family A, 3	ENSMUSG00000094196	-0.528519	5.56433	-7.38222	9.94898e-06	0.00022433	3.63262
10423505	Cmbl	carboxymethylenebutenolidase-like (Pseudomonas)	ENSMUSG00000022235	-0.527845	8.74975	-10.3776	3.06313e-07	2.55806e-05	7.21788
10436588	2810055G20Rik	RIKEN cDNA 2810055G20 gene	ENSMUSG00000090386	-0.527778	7.77491	-9.08166	1.23863e-06	5.8428e-05	5.78613
10455084	Pcdhb10	protocadherin beta 10	ENSMUSG00000045657	0.526299	6.2394	6.98852	1.69018e-05	0.000315943	3.08279
10406466	Tmem161b	transmembrane protein 161B	ENSMUSG00000035762	0.525593	10.6254	11.6741	8.67535e-08	1.13728e-05	8.49775
10538563	Vmn1r6	vomeronasal 1 receptor 6	ENSMUSG00000058923	-0.52334	2.74971	-3.16784	0.00836347	0.0285294	-3.29819
10455078	Pcdhb8	protocadherin beta 8	ENSMUSG00000045876	0.522092	7.9476	8.31727	3.0418e-06	0.000102952	4.85954
10544523	Rny1	RNA, Y1 small cytoplasmic, Ro-associated	ENSMUSG00000065701	-0.521667	8.8417	-4.32783	0.00104711	0.00583812	-1.18968
10397575	Nrxn3	neurexin III	ENSMUSG00000066392	-0.521312	6.86106	-8.06941	4.12446e-06	0.00012566	4.54472
10583634	Qtrt1	queuine tRNA-ribosyltransferase 1	ENSMUSG00000002825	0.520447	9.77369	9.00022	1.35925e-06	6.2041e-05	5.69048
10410295	Zfp595	zinc finger protein 595	ENSMUSG00000057842	0.51916	6.65589	9.12959	1.17306e-06	5.68442e-05	5.8421
10425335	Syngr1	synaptogyrin 1	ENSMUSG00000022415	-0.518205	10.1513	-10.0474	4.3126e-07	3.13679e-05	6.86853
10411633	Naip1	NLR family, apoptosis inhibitory protein 1	ENSMUSG00000021640	0.517278	5.88653	7.59882	7.49314e-06	0.000186897	3.9265
10410644	Zfp72	zinc finger protein 72	ENSMUSG00000069184	0.516918	8.48525	8.47488	2.515e-06	9.17505e-05	5.05598
10582941	Cwf19l2	CWF19-like 2, cell cycle control (S. pombe)	ENSMUSG00000025898	0.515708	7.734	6.01918	6.78751e-05	0.000801282	1.63927
10484371	Calcrl	calcitonin receptor-like	ENSMUSG00000059588	-0.514915	5.36413	-5.10651	0.000282812	0.00223906	0.159837
10511416	Tox	thymocyte selection-associated high mobility group box	ENSMUSG00000041272	-0.512761	7.23236	-8.40416	2.73813e-06	9.73808e-05	4.9682
10530560	Slain2	SLAIN motif family, member 2	ENSMUSG00000036087	-0.512728	6.50884	-4.47568	0.00081165	0.00484156	-0.927937
10424922	Slc52a2	solute carrier protein 52, member 2	ENSMUSG00000022560	-0.512718	8.54346	-8.37225	2.8457e-06	9.96348e-05	4.9284
10541246	Il17ra	interleukin 17 receptor A	ENSMUSG00000002897	-0.512669	7.57809	-9.44443	8.25099e-07	4.77034e-05	6.20374
10507594	Slc2a1	solute carrier family 2 (facilitated glucose transporter), member 1	ENSMUSG00000028645	-0.512515	10.3044	-8.85414	1.6084e-06	6.91619e-05	5.51711
10576189	Ankrd11	ankyrin repeat domain 11	ENSMUSG00000035569	-0.512312	6.41604	-2.56959	0.025031	0.0675435	-4.3785
10569370	Th	tyrosine hydroxylase	ENSMUSG00000000214	0.511963	8.87991	10.0963	4.09738e-07	3.0592e-05	6.92086
10603833	Usmg5	upregulated during skeletal muscle growth 5	ENSMUSG00000071528	-0.511355	11.3512	-6.4249	3.73563e-05	0.000528425	2.25934
10439268	Dtx3l	deltex 3-like (Drosophila)	ENSMUSG00000049502	0.510719	7.15322	7.48368	8.70576e-06	0.000206007	3.77102
10547100	Plxnd1	plexin D1	ENSMUSG00000030123	-0.510559	8.29343	-9.20661	1.07538e-06	5.41242e-05	5.93152
10474229	Cd59a	CD59a antigen	ENSMUSG00000032679	-0.508601	8.01327	-4.14966	0.00142844	0.0072969	-1.50806
10594183	Senp8	SUMO/sentrin specific peptidase 8	ENSMUSG00000051705	0.50838	7.4768	10.4484	2.84996e-07	2.47157e-05	7.29143
10425257	Polr2f	polymerase (RNA) II (DNA directed) polypeptide F	ENSMUSG00000033020	-0.508274	11.1827	-11.4289	1.09104e-07	1.35169e-05	8.26627
10410465	BC018507	cDNA sequence BC018507	ENSMUSG00000034525	0.505415	10.2747	10.8466	1.91299e-07	1.90091e-05	7.69713
10586816	Sltm	SAFB-like, transcription modulator	ENSMUSG00000032212	0.504716	9.22249	7.21464	1.24373e-05	0.000256341	3.40107
10495675	F3	coagulation factor III	ENSMUSG00000028128	-0.504229	8.22824	-7.3873	9.88237e-06	0.000224173	3.63958
10539295	Dqx1	DEAQ RNA-dependent ATPase	ENSMUSG00000009145	0.503957	7.4705	8.11893	3.87891e-06	0.000120672	4.60821
10515834	Olfr1328	olfactory receptor 1328	ENSMUSG00000096368	0.503676	6.22416	7.23784	1.20563e-05	0.000252644	3.43335
10570610	Defb4	defensin beta 4	ENSMUSG00000059230	0.503664	6.14829	3.39977	0.0054736	0.0203527	-2.87303
10366951	Ndufa4l2	NADH dehydrogenase (ubiquinone) 1 alpha subcomplex, 4-like 2	ENSMUSG00000040280	-0.503193	7.06487	-6.78028	2.25473e-05	0.000376033	2.78361
10451551	Guca1a	guanylate cyclase activator 1a (retina)	ENSMUSG00000023982	-0.502609	7.58798	-6.80063	2.19155e-05	0.000369874	2.81311
10585703	Rpp25	ribonuclease P/MRP 25 subunit	ENSMUSG00000062309	-0.501531	9.22155	-9.60864	6.89266e-07	4.25788e-05	6.38833
10564377	Lrrk1	leucine-rich repeat kinase 1	ENSMUSG00000015133	0.500871	7.80241	9.23067	1.04669e-06	5.33952e-05	5.95933
10348653	Gpc1	glypican 1	ENSMUSG00000034220	-0.500751	8.4366	-8.328	3.00242e-06	0.000102952	4.87301
10357736	Nfasc	neurofascin	ENSMUSG00000026442	-0.500474	6.96325	-5.08867	0.000291149	0.00229034	0.129781
10411728	Cenph	centromere protein H	ENSMUSG00000045273	0.500415	8.70115	7.87178	5.28352e-06	0.000148212	4.28842
10407286	BC067074	cDNA sequence BC067074	ENSMUSG00000021763	-0.49866	6.01692	-6.69561	2.53909e-05	0.000405464	2.66028
10515253	Uqcrh	ubiquinol-cytochrome c reductase hinge protein	ENSMUSG00000063882	-0.497977	9.86363	-4.36874	0.000975591	0.00556695	-1.11703
10436600	Mir99a	microRNA 99a	ENSMUSG00000065530	-0.496189	6.0175	-6.84544	2.05906e-05	0.000354951	2.87786
10524588	Ankrd13a	ankyrin repeat domain 13a	ENSMUSG00000041870	-0.496008	9.30703	-8.32041	3.03019e-06	0.000102952	4.86349
10535956	Stard13	StAR-related lipid transfer (START) domain containing 13	ENSMUSG00000016128	-0.495297	7.59006	-7.35225	1.03515e-05	0.000227049	3.59148
10595109	Lrrc1	leucine rich repeat containing 1	ENSMUSG00000032352	0.494717	8.0181	6.76452	2.30496e-05	0.000381028	2.76073
10438220	Car15	carbonic anhydrase 15	ENSMUSG00000090236	0.493868	7.34691	6.23234	4.94584e-05	0.00064165	1.96792
10490302	Zfp931	zinc finger protein 931	ENSMUSG00000078861	0.493242	7.49305	2.36603	0.0362036	0.0899425	-4.73378
10480432	Mastl	microtubule associated serine/threonine kinase-like	ENSMUSG00000026779	0.493222	9.17928	7.34843	1.04041e-05	0.000227759	3.58623
10580033	Cd97	CD97 antigen	ENSMUSG00000002885	-0.492874	6.1269	-7.31822	1.083e-05	0.000234352	3.54462
10490289	LOC628147	zinc finger protein 709-like	NA	0.492359	5.07399	2.47217	0.0298811	0.0774259	-4.54966
10455050	Pcdhb2	protocadherin beta 2	ENSMUSG00000051599	0.491565	6.60423	6.18662	5.29048e-05	0.00067036	1.89798
10587495	Irak1bp1	interleukin-1 receptor-associated kinase 1 binding protein 1	ENSMUSG00000032251	0.49092	8.48266	5.55455	0.000138317	0.00134895	0.900645
10386058	Sparc	secreted acidic cysteine rich glycoprotein	ENSMUSG00000018593	-0.490751	8.13844	-9.24262	1.03273e-06	5.3233e-05	5.97313
10432178	Snora2b	small nucleolar RNA, H/ACA box 2B	NA	0.490119	7.93956	4.53458	0.000733897	0.00450161	-0.824327
10438433	Olfr171	olfactory receptor 171	ENSMUSG00000060480	0.489644	5.75054	4.55478	0.00070906	0.00437784	-0.788888
10406733	Zbed3	zinc finger, BED domain containing 3	ENSMUSG00000041995	0.489515	9.69706	7.18409	1.29587e-05	0.000264189	3.35846
10435641	Fstl1	follistatin-like 1	ENSMUSG00000022816	-0.489356	10.2476	-6.53964	3.16794e-05	0.000468705	2.43051
10583312	Taf1d	TATA box binding protein (Tbp)-associated factor, RNA polymerase I, D	ENSMUSG00000031939	0.489316	10.1029	7.57189	7.75959e-06	0.000190592	3.89029
10499062	Fhdc1	FH2 domain containing 1	ENSMUSG00000041842	-0.488893	7.80647	-8.13063	3.82326e-06	0.000120065	4.62316
10455135	Pcdhb21	protocadherin beta 21	ENSMUSG00000044022	0.488556	6.6781	5.49896	0.000150919	0.00143583	0.810244
10474064	Trp53i11	transformation related protein 53 inducible protein 11	ENSMUSG00000068735	-0.488521	11.5236	-10.2566	3.46885e-07	2.75407e-05	7.09097
10592289	Ccdc15	coiled-coil domain containing 15	ENSMUSG00000034303	0.48791	7.15535	5.41567	0.000172124	0.0015867	0.673981
10368534	Ncoa7	nuclear receptor coactivator 7	ENSMUSG00000039697	0.486279	8.20292	10.1343	3.93793e-07	2.95975e-05	6.96143
10437224	Mx2	myxovirus (influenza virus) resistance 2	ENSMUSG00000023341	0.4862	6.42393	6.06382	6.34884e-05	0.000759839	1.70863
10360920	Tgfb2	transforming growth factor, beta 2	ENSMUSG00000039239	-0.485839	8.85795	-9.78767	5.68083e-07	3.78969e-05	6.58652
10430096	Lrrc24	leucine rich repeat containing 24	ENSMUSG00000033707	-0.485538	8.44397	-8.79146	1.72999e-06	7.19699e-05	5.44201
10412394	Nnt	nicotinamide nucleotide transhydrogenase	ENSMUSG00000025453	0.485328	10.0233	11.6217	9.10818e-08	1.1803e-05	8.44863
10423363	Ank	progressive ankylosis	ENSMUSG00000022265	-0.485154	8.98591	-9.60614	6.91141e-07	4.25788e-05	6.38554
10355916	Pax3	paired box 3	ENSMUSG00000004872	-0.484867	6.86553	-5.68017	0.000113759	0.00116487	1.10336
10406193	Ccdc127	coiled-coil domain containing 127	ENSMUSG00000021578	0.484815	9.79012	9.73778	5.9936e-07	3.9286e-05	6.53161
10379153	Aldoc	aldolase C, fructose-bisphosphate	ENSMUSG00000017390	-0.483886	7.95804	-8.18093	3.5934e-06	0.000113798	4.68728
10584231	Pus3	pseudouridine synthase 3	ENSMUSG00000032103	0.483665	8.40282	7.4681	8.88531e-06	0.000208694	3.74986
10501374	5330417C22Rik	RIKEN cDNA 5330417C22 gene	ENSMUSG00000040412	-0.482914	7.78714	-8.2221	3.41633e-06	0.000110215	4.73953
10410709	Rfesd	Rieske (Fe-S) domain containing	ENSMUSG00000043190	0.482748	9.10201	10.0559	4.27461e-07	3.12935e-05	6.87758
10410955	Atp6ap1l	ATPase, H+ transporting, lysosomal accessory protein 1-like	ENSMUSG00000078958	0.482356	7.17297	7.42318	9.42567e-06	0.000218652	3.68865
10393559	Timp2	tissue inhibitor of metalloproteinase 2	ENSMUSG00000017466	0.481933	7.55437	6.18499	5.30327e-05	0.00067036	1.89547
10428353	Lrp12	low density lipoprotein-related protein 12	ENSMUSG00000022305	-0.481909	9.38717	-11.3306	1.19748e-07	1.40629e-05	8.17212
10522288	Shisa3	shisa homolog 3 (Xenopus laevis)	ENSMUSG00000050010	-0.481902	7.03107	-8.9027	1.52053e-06	6.73217e-05	5.575
10535904	Hsph1	heat shock 105kDa/110kDa protein 1	ENSMUSG00000029657	-0.481769	9.91223	-8.49596	2.45231e-06	9.14776e-05	5.08205
10455069	Pcdhb6	protocadherin beta 6	ENSMUSG00000051678	0.481678	7.68057	8.78419	1.74471e-06	7.21436e-05	5.43327
10426244	Mapk8ip2	mitogen-activated protein kinase 8 interacting protein 2	ENSMUSG00000022619	-0.479469	9.16928	-10.1682	3.80145e-07	2.87635e-05	6.99746
10406757	Col4a3bp	collagen, type IV, alpha 3 (Goodpasture antigen) binding protein	ENSMUSG00000021669	0.479336	9.53944	8.52491	2.36895e-06	8.9323e-05	5.11775
10447395	Msh2	mutS homolog 2 (E. coli)	ENSMUSG00000024151	0.478707	7.55864	5.08064	0.00029499	0.00230952	0.116227
10541895	Tnfrsf1a	tumor necrosis factor receptor superfamily, member 1a	ENSMUSG00000030341	-0.477846	9.35974	-7.17834	1.30594e-05	0.000265761	3.35044
10435789	Zbtb20	zinc finger and BTB domain containing 20	ENSMUSG00000022708	0.47763	9.69734	10.2698	3.42174e-07	2.73833e-05	7.10492
10517421	Pnrc2	proline-rich nuclear receptor coactivator 2	ENSMUSG00000028675	0.477566	10.4732	8.2214	3.41926e-06	0.000110215	4.73864
10427461	Ptger4	prostaglandin E receptor 4 (subtype EP4)	ENSMUSG00000039942	-0.47743	8.07754	-9.458	8.12849e-07	4.74822e-05	6.2191
10493555	Kcnn3	potassium intermediate/small conductance calcium-activated channel, subfamily N, member 3	ENSMUSG00000000794	-0.475428	8.98272	-7.0958	1.46012e-05	0.000287284	3.23464
10504072	Dnaic1	dynein, axonemal, intermediate chain 1	ENSMUSG00000061322	-0.475401	6.97744	-7.88291	5.20969e-06	0.000147203	4.30299
10442270	Zfp946	zinc finger protein 946	ENSMUSG00000071266	0.475223	8.41991	6.16497	5.46254e-05	0.000685798	1.86474
10359908	Rgs4	regulator of G-protein signaling 4	ENSMUSG00000038530	-0.474629	6.81878	-7.74676	6.19374e-06	0.000163426	4.12382
10561128	Cyp2s1	cytochrome P450, family 2, subfamily s, polypeptide 1	ENSMUSG00000040703	-0.473178	6.87633	-5.05143	0.000309403	0.00238428	0.0668934
10356084	Irs1	insulin receptor substrate 1	ENSMUSG00000055980	0.472933	9.94891	8.40106	2.74838e-06	9.74377e-05	4.96434
10475800	Adra2b	adrenergic receptor, alpha 2b	ENSMUSG00000058620	-0.471866	7.12839	-5.67742	0.000114245	0.00116772	1.09894
10557355	D430042O09Rik	RIKEN cDNA D430042O09 gene	ENSMUSG00000032743	0.471474	7.33468	6.14335	5.64027e-05	0.000700313	1.8315
10368647	Dse	dermatan sulfate epimerase	ENSMUSG00000039497	0.471014	5.969	4.81714	0.000455627	0.00316802	-0.332972
10604743	Snord61	small nucleolar RNA, C/D box 61	NA	0.471004	5.55861	4.15078	0.00142564	0.0072892	-1.50605
10581151	Rrad	Ras-related associated with diabetes	ENSMUSG00000031880	0.470797	7.50227	4.30662	0.00108634	0.00597434	-1.22743
10565786	Mogat2	monoacylglycerol O-acyltransferase 2	ENSMUSG00000052396	-0.470478	8.92513	-7.50735	8.44033e-06	0.000201205	3.80312
10468287	Usmg5	upregulated during skeletal muscle growth 5	ENSMUSG00000071528	-0.470421	11.0694	-6.42933	3.71181e-05	0.000526376	2.26598
10422518	Tmtc4	transmembrane and tetratricopeptide repeat containing 4	ENSMUSG00000041594	-0.469993	9.57167	-8.03271	4.31715e-06	0.000129102	4.49749
10529305	Tmem129	transmembrane protein 129	ENSMUSG00000019295	0.469932	10.3878	10.3514	3.14649e-07	2.60835e-05	7.1905
10458314	Tmem173	transmembrane protein 173	ENSMUSG00000024349	0.469719	8.6307	7.14017	1.37494e-05	0.000277301	3.29701
10586967	Gm7265	predicted gene 7265	NA	0.469424	8.13206	9.21819	1.06146e-06	5.38642e-05	5.94491
10501754	D3Bwg0562e	DNA segment, Chr 3, Brigham & Women's Genetics 0562 expressed	ENSMUSG00000044667	-0.469268	6.77255	-5.41131	0.000173317	0.00159249	0.666823
10410187	Nlrp4f	NLR family, pyrin domain containing 4F	ENSMUSG00000032999	0.469102	5.80336	7.03862	1.57824e-05	0.000302604	3.1539
10590654	Aasdhppt	aminoadipate-semialdehyde dehydrogenase-phosphopantetheinyl transferase	ENSMUSG00000025894	0.468765	9.5897	7.29188	1.12165e-05	0.000240356	3.50825
10572730	Zfp617	zinc finger protein 617	ENSMUSG00000066880	0.467779	7.68313	4.66682	0.000586363	0.00382561	-0.59317
10455065	Pcdhb5	protocadherin beta 5	ENSMUSG00000063687	0.467643	6.38442	5.99941	6.99194e-05	0.000816913	1.60847
10402061	Eml5	echinoderm microtubule associated protein like 5	ENSMUSG00000051166	0.467626	9.55561	8.38285	2.80946e-06	9.88727e-05	4.94163
10510019	B330016D10Rik	RIKEN cDNA B330016D10 gene	NA	0.467346	6.14437	5.1516	0.000262834	0.00213325	0.235631
10406205	Erap1	endoplasmic reticulum aminopeptidase 1	ENSMUSG00000021583	0.466992	7.42929	7.85308	5.40998e-06	0.000150598	4.26393
10410351	AA987161	expressed sequence AA987161	ENSMUSG00000058093	0.465505	9.33304	8.05501	4.19893e-06	0.000126913	4.52621
10597648	Myd88	myeloid differentiation primary response gene 88	ENSMUSG00000032508	0.465131	7.07752	7.89222	5.14883e-06	0.000145849	4.31515
10572161	Zfp930	zinc finger protein 930	ENSMUSG00000059897	0.46486	9.3757	6.87475	1.97702e-05	0.000345565	2.92007
10497646	Phc3	polyhomeotic-like 3 (Drosophila)	ENSMUSG00000037652	0.464754	7.72928	5.34348	0.00019305	0.00171644	0.555109
10597627	Oxsr1	oxidative-stress responsive 1	ENSMUSG00000036737	0.464537	9.61946	10.1691	3.79768e-07	2.87635e-05	6.99848
10391987	Gm10844	predicted gene 10844	NA	-0.464427	7.16298	-4.8625	0.000422483	0.00300889	-0.255001
10532944	Mlec	malectin	ENSMUSG00000048578	-0.46398	9.30004	-10.2278	3.57343e-07	2.7977e-05	7.06064
10558274	Fam175b	family with sequence similarity 175, member B	ENSMUSG00000030965	0.463827	8.71144	10.5623	2.53951e-07	2.30891e-05	7.40894
10527133	Wipi2	WD repeat domain, phosphoinositide interacting 2	ENSMUSG00000029578	-0.463699	9.60525	-12.089	5.94113e-08	8.58722e-06	8.87888
10394258	Adcy3	adenylate cyclase 3	ENSMUSG00000020654	-0.463448	7.83263	-7.98161	4.60166e-06	0.000134751	4.43144
10572733	Zfp961	zinc finger protein 961	ENSMUSG00000052446	0.463163	8.78613	7.1941	1.27853e-05	0.0002616	3.37244
10595614	Snhg5	small nucleolar RNA host gene 5	ENSMUSG00000097195	0.462241	10.0584	7.38859	9.86561e-06	0.000224173	3.64134
10494122	Rfx5	regulatory factor X, 5 (influences HLA class II expression)	ENSMUSG00000005774	0.462169	8.18676	8.01837	4.39502e-06	0.000129853	4.47899
10594679	Tln2	talin 2	ENSMUSG00000052698	0.462015	8.30057	9.11783	1.18878e-06	5.7275e-05	5.82839
10406287	Ttc37	tetratricopeptide repeat domain 37	ENSMUSG00000033991	0.461512	9.61131	9.98928	4.58467e-07	3.2922e-05	6.80597
10578241	Dlc1	deleted in liver cancer 1	ENSMUSG00000031523	-0.460807	7.74519	-7.48277	8.71612e-06	0.000206007	3.76979
10409660	Gkap1	G kinase anchoring protein 1	ENSMUSG00000021552	0.460467	8.32608	6.08117	6.18663e-05	0.000744376	1.7355
10410370	Zfp65	zinc finger protein 65	ENSMUSG00000071281	0.459081	8.47344	7.36316	1.02031e-05	0.000226183	3.60646
10547719	Clstn3	calsyntenin 3	ENSMUSG00000008153	0.458995	8.23676	6.57333	3.01925e-05	0.000456057	2.48043
10488693	Tspyl3	TSPY-like 3	ENSMUSG00000074671	-0.458577	7.40789	-5.16405	0.000257582	0.00210586	0.256519
10546736	Cntn3	contactin 3	ENSMUSG00000030075	0.457936	9.89495	8.79312	1.72664e-06	7.19699e-05	5.444
10399360	Rhob	ras homolog gene family, member B	ENSMUSG00000054364	0.457453	8.42739	9.24148	1.03406e-06	5.3233e-05	5.9718
10558295	Zranb1	zinc finger, RAN-binding domain containing 1	ENSMUSG00000030967	0.457414	8.25952	7.05106	1.55171e-05	0.00029945	3.1715
10369102	Cep85l	centrosomal protein 85-like	ENSMUSG00000038594	0.457314	8.30296	7.31999	1.08046e-05	0.000234251	3.54706
10533781	Mphosph9	M-phase phosphoprotein 9	ENSMUSG00000038126	-0.456234	7.73493	-7.10445	1.44308e-05	0.000285379	3.24682
10579915	Smarca5	SWI/SNF related, matrix associated, actin dependent regulator of chromatin, subfamily a, member 5	ENSMUSG00000031715	0.455617	9.91561	5.53672	0.000142231	0.00137523	0.87171
10573803	Cyld	cylindromatosis (turban tumor syndrome)	ENSMUSG00000036712	0.455181	8.359	7.05711	1.53897e-05	0.000298629	3.18006
10572485	Rab3a	RAB3A, member RAS oncogene family	ENSMUSG00000031840	-0.454664	7.88815	-7.51682	8.33648e-06	0.000201205	3.81595
10441195	Dscam	Down syndrome cell adhesion molecule	ENSMUSG00000050272	-0.454116	8.45022	-6.37409	4.02081e-05	0.000554842	2.18294
10409876	Ctla2a	cytotoxic T lymphocyte-associated protein 2 alpha	ENSMUSG00000044258	-0.453578	7.81403	-4.5035	0.000773911	0.00468335	-0.878958
10572813	Usmg5	upregulated during skeletal muscle growth 5	ENSMUSG00000071528	-0.45356	11.2703	-6.37572	4.0113e-05	0.000554842	2.1854
10364593	Cnn2	calponin 2	ENSMUSG00000004665	0.453247	9.03103	5.02997	0.000320471	0.00244121	0.0305517
10424607	Ptp4a3	protein tyrosine phosphatase 4a3	ENSMUSG00000059895	-0.453197	9.23422	-7.21981	1.23512e-05	0.000255971	3.40828
10552358	Zfp936	zinc finger protein 936	ENSMUSG00000064194	0.452898	7.58721	6.50671	3.3208e-05	0.000483704	2.38158
10444258	Psmb8	proteasome (prosome, macropain) subunit, beta type 8 (large multifunctional peptidase 7)	ENSMUSG00000024338	0.452313	7.40314	8.47228	2.52285e-06	9.17505e-05	5.05276
10577792	Plekha2	pleckstrin homology domain-containing, family A (phosphoinositide binding specific) member 2	ENSMUSG00000031557	0.452128	8.52964	6.70018	2.5228e-05	0.000403955	2.66697
10404380	Dusp22	dual specificity phosphatase 22	ENSMUSG00000069255	0.451965	7.73001	8.49268	2.46197e-06	9.14776e-05	5.07799
10414269	Bnip3	BCL2/adenovirus E1B interacting protein 3	ENSMUSG00000078566	-0.451775	8.78781	-5.4055	0.000174921	0.0016033	0.657281
10475941	Zc3h6	zinc finger CCCH type containing 6	ENSMUSG00000042851	0.451773	8.54219	7.51151	8.39453e-06	0.000201205	3.80876
10433445	Abat	4-aminobutyrate aminotransferase	ENSMUSG00000057880	-0.451089	9.71553	-11.1936	1.36494e-07	1.55437e-05	8.03961
10531560	Antxr2	anthrax toxin receptor 2	ENSMUSG00000029338	-0.450739	8.45468	-6.57111	3.02881e-05	0.000456397	2.47715
10543959	Ptn	pleiotrophin	ENSMUSG00000029838	0.450549	7.55642	5.63836	0.000121376	0.00122178	1.03613
10407370	4833420G17Rik	RIKEN cDNA 4833420G17 gene	ENSMUSG00000062822	0.449622	10.2759	9.40479	8.62037e-07	4.88227e-05	6.15877
10403834	Sfrp4	secreted frizzled-related protein 4	ENSMUSG00000021319	0.449414	5.86265	6.06527	6.33517e-05	0.000759494	1.71087
10566514	Mrps36	mitochondrial ribosomal protein S36	ENSMUSG00000061474	0.44938	8.29459	4.51123	0.000763744	0.00463176	-0.865351
10361375	Fbxo5	F-box protein 5	ENSMUSG00000019773	0.449351	9.57967	5.88235	8.34433e-05	0.000930902	1.42492
10603814	Slc9a7	solute carrier family 9 (sodium/hydrogen exchanger), member 7	ENSMUSG00000037341	-0.44891	7.7849	-7.84415	5.47156e-06	0.000151504	4.25221
10407358	Paip1	polyadenylate binding protein-interacting protein 1	ENSMUSG00000025451	0.448448	10.5247	8.78309	1.74696e-06	7.21436e-05	5.43194
10410975	Zcchc9	zinc finger, CCHC domain containing 9	ENSMUSG00000021621	0.448374	9.70039	9.08234	1.23766e-06	5.8428e-05	5.78694
10472809	Dlx1	distal-less homeobox 1	ENSMUSG00000041911	-0.448117	7.67205	-7.37999	9.97834e-06	0.000224386	3.62956
10438639	Dgkg	diacylglycerol kinase, gamma	ENSMUSG00000022861	-0.447881	6.53325	-5.92394	7.83462e-05	0.000890096	1.49034
10590494	Kif15	kinesin family member 15	ENSMUSG00000036768	0.447427	8.93347	6.11219	5.90739e-05	0.000719999	1.78346
10583402	Zfp317	zinc finger protein 317	ENSMUSG00000057551	0.447418	8.6351	6.91009	1.88273e-05	0.000334793	2.9708
10599612	Phf6	PHD finger protein 6	ENSMUSG00000025626	0.446863	8.40835	6.20783	5.12753e-05	0.000658403	1.93046
10351347	Creg1	cellular repressor of E1A-stimulated genes 1	ENSMUSG00000040713	-0.4468	9.2133	-4.17154	0.00137472	0.00711192	-1.46881
10392415	Rgs9	regulator of G-protein signaling 9	ENSMUSG00000020599	0.446739	8.02324	6.67051	2.63058e-05	0.000415367	2.62353
10407012	Srek1ip1	splicing regulatory glutamine/lysine-rich protein 1interacting protein 1	ENSMUSG00000021716	0.446507	8.58324	7.62694	7.22527e-06	0.000182018	3.96422
10526038	Mmp17	matrix metallopeptidase 17	ENSMUSG00000029436	-0.446483	8.30121	-8.38117	2.81516e-06	9.88727e-05	4.93954
10603485	Ebp	phenylalkylamine Ca2+ antagonist (emopamil) binding protein	ENSMUSG00000031168	-0.446107	8.33239	-7.02803	1.60124e-05	0.000304425	3.13889
10478847	1500012F01Rik	RIKEN cDNA 1500012F01 gene	ENSMUSG00000074578	0.445805	11.5777	9.12827	1.1748e-06	5.68442e-05	5.84057
10436955	2410124H12Rik	RIKEN cDNA 2410124H12 gene	ENSMUSG00000051297	-0.445101	6.53203	-8.92672	1.47897e-06	6.64301e-05	5.60354
10586184	Tipin	timeless interacting protein	ENSMUSG00000032397	0.444302	8.79451	5.36337	0.000187031	0.00167913	0.587925
10410393	Mtrr	5-methyltetrahydrofolate-homocysteine methyltransferase reductase	ENSMUSG00000034617	0.443928	9.58653	8.80685	1.69924e-06	7.15949e-05	5.46049
10406407	Arrdc3	arrestin domain containing 3	ENSMUSG00000074794	0.443918	10.0309	9.25861	1.0144e-06	5.27524e-05	5.99154
10518455	Agtrap	angiotensin II, type I receptor-associated protein	ENSMUSG00000029007	-0.443533	8.15513	-7.42849	9.35997e-06	0.000217576	3.6959
10566516	Rrp8	ribosomal RNA processing 8, methyltransferase, homolog (yeast)	ENSMUSG00000030888	0.443403	9.82571	9.29663	9.72163e-07	5.22073e-05	6.03525
10360336	Olfr1406	olfactory receptor 1406	ENSMUSG00000058981	-0.443001	5.06062	-2.82532	0.0156794	0.0468635	-3.92148
10463599	Nfkb2	nuclear factor of kappa light polypeptide gene enhancer in B cells 2, p49/p100	ENSMUSG00000025225	0.442829	8.30658	7.78441	5.90318e-06	0.000158654	4.17358
10348664	Mir149	microRNA 149	NA	-0.442512	7.83825	-5.76211	0.000100263	0.00106138	1.23437
10582925	Alkbh8	alkB, alkylation repair homolog 8 (E. coli)	ENSMUSG00000025899	0.441829	9.18401	8.29677	3.11858e-06	0.000104278	4.83378
10420730	Fdft1	farnesyl diphosphate farnesyl transferase 1	ENSMUSG00000021273	-0.441475	10.9544	-7.86962	5.29798e-06	0.000148212	4.28559
10602716	Ubqln2	ubiquilin 2	ENSMUSG00000050148	-0.44139	9.88684	-8.61006	2.14094e-06	8.41009e-05	5.2222
10585803	Stra6	stimulated by retinoic acid gene 6	ENSMUSG00000032327	0.44136	9.9534	6.44914	3.60728e-05	0.000514694	2.29565
10373588	Rdh5	retinol dehydrogenase 5	ENSMUSG00000025350	0.440753	7.87394	6.59881	2.91178e-05	0.00044542	2.51807
10518494	Ptchd2	patched domain containing 2	ENSMUSG00000041544	-0.440678	8.12545	-9.21487	1.06544e-06	5.38642e-05	5.94107
10362097	H60b	histocompatibility 60b	ENSMUSG00000075297	-0.44032	6.21043	-5.95641	7.45956e-05	0.000856406	1.54126
10573747	Adcy7	adenylate cyclase 7	ENSMUSG00000031659	-0.440265	8.07412	-7.37901	9.9913e-06	0.000224386	3.62821
10592942	Kmt2a	lysine (K)-specific methyltransferase 2A	ENSMUSG00000002028	0.440082	10.5431	8.42829	2.6597e-06	9.54952e-05	4.99821
10406026	Mrpl36	mitochondrial ribosomal protein L36	ENSMUSG00000021607	0.439801	9.79162	6.65511	2.68843e-05	0.000420194	2.60094
10435457	Parp9	poly (ADP-ribose) polymerase family, member 9	ENSMUSG00000022906	0.43891	7.40848	5.64992	0.000119218	0.00120543	1.05474
10550822	Vmn1r179	vomeronasal 1 receptor 179	ENSMUSG00000046924	-0.438518	5.66966	-6.79739	2.20148e-05	0.000370994	2.80842
10411899	Trappc13	trafficking protein particle complex 13	ENSMUSG00000021711	0.43757	9.74777	8.21997	3.42526e-06	0.000110215	4.73683
10406423	Mblac2	metallo-beta-lactamase domain containing 2	ENSMUSG00000051098	0.437029	10.49	8.35889	2.89204e-06	0.000100323	4.9117
10586759	Bnip2	BCL2/adenovirus E1B interacting protein 2	ENSMUSG00000011958	0.436629	9.80564	9.95232	4.76719e-07	3.35908e-05	6.76603
10448182	Eef1a1	eukaryotic translation elongation factor 1 alpha 1	ENSMUSG00000037742	0.436411	11.1191	3.77071	0.00279815	0.0121051	-2.19411
10398402	Mir495	microRNA 495	NA	-0.436273	3.27614	-4.19467	0.0013202	0.00691634	-1.42735
10552363	Zfp936	zinc finger protein 936	ENSMUSG00000064194	0.435965	7.43537	6.35791	4.11637e-05	0.000562521	2.15855
10404996	Ninj1	ninjurin 1	ENSMUSG00000037966	-0.435339	9.43044	-10.1898	3.71689e-07	2.87015e-05	7.02044
10581271	Zdhhc1	zinc finger, DHHC domain containing 1	ENSMUSG00000039199	0.434481	9.01463	6.71445	2.47268e-05	0.000399957	2.6878
10358091	Nav1	neuron navigator 1	ENSMUSG00000009418	-0.433199	9.82747	-8.08591	4.04083e-06	0.000124132	4.56591
10530059	Sel1l3	sel-1 suppressor of lin-12-like 3 (C. elegans)	ENSMUSG00000029189	-0.433158	10.5425	-9.52325	7.56617e-07	4.56155e-05	6.29268
10596267	Dnajc13	DnaJ (Hsp40) homolog, subfamily C, member 13	ENSMUSG00000032560	0.433076	8.93537	7.19901	1.27012e-05	0.000260826	3.37929
10535065	Adap1	ArfGAP with dual PH domains 1	ENSMUSG00000056413	0.432117	7.74515	5.29489	0.000208637	0.00182198	0.474689
10424340	Ndufb9	NADH dehydrogenase (ubiquinone) 1 beta subcomplex, 9	ENSMUSG00000022354	-0.432112	11.3633	-9.46112	8.10064e-07	4.74822e-05	6.22262
10463951	Smc3	structural maintenance of chromosomes 3	ENSMUSG00000024974	0.431769	10.2517	6.93505	1.81904e-05	0.00032994	3.00652
10359917	Hsd17b7	hydroxysteroid (17-beta) dehydrogenase 7	ENSMUSG00000026675	-0.431555	9.42088	-6.8695	1.99147e-05	0.000347014	2.91251
10411464	Fcho2	FCH domain only 2	ENSMUSG00000041685	0.431403	10.2299	8.46435	2.54695e-06	9.23288e-05	5.04295
10369738	Sirt1	sirtuin 1	ENSMUSG00000020063	0.431368	8.53952	8.52726	2.36232e-06	8.9323e-05	5.12064
10360848	March2	mitochondrial amidoxime reducing component 2	ENSMUSG00000073481	0.430414	6.70368	5.0521	0.000309069	0.00238334	0.0680105
10435897	BC027231	cDNA sequence BC027231	ENSMUSG00000036208	0.430272	8.4561	7.83987	5.5013e-06	0.000151504	4.2466
10411595	Naip2	NLR family, apoptosis inhibitory protein 2	ENSMUSG00000078945	0.430271	9.02326	6.73501	2.40228e-05	0.000391048	2.71779
10529895	Qdpr	quinoid dihydropteridine reductase	ENSMUSG00000015806	-0.430143	9.40317	-7.29062	1.12354e-05	0.000240356	3.5065
10438431	Olfr170	olfactory receptor 170	ENSMUSG00000062245	0.429999	5.98789	3.60871	0.00374592	0.0150989	-2.49007
10347980	Itm2c	integral membrane protein 2C	ENSMUSG00000026223	-0.429609	10.2406	-7.21606	1.24136e-05	0.00025632	3.40305
10565852	Rnf169	ring finger protein 169	ENSMUSG00000058761	0.429123	8.94291	8.50463	2.42702e-06	9.12076e-05	5.09275
10567995	Nupr1	nuclear protein transcription regulator 1	ENSMUSG00000030717	0.428479	10.0626	5.84537	8.82723e-05	0.000967135	1.36654
10560719	Igsf23	immunoglobulin superfamily, member 23	ENSMUSG00000040498	-0.428458	8.24594	-6.40253	3.85844e-05	0.000542394	2.22575
10393098	Wbp2	WW domain binding protein 2	ENSMUSG00000034341	-0.428412	9.34168	-7.75139	6.15719e-06	0.000163332	4.12995
10581824	Fa2h	fatty acid 2-hydroxylase	ENSMUSG00000033579	-0.428201	7.06002	-6.92875	1.83489e-05	0.00032994	2.99752
10489018	Rbm39	RNA binding motif protein 39	ENSMUSG00000027620	0.427793	10.1926	9.84343	5.35189e-07	3.6568e-05	6.64761
10607467	Sat1	spermidine/spermine N1-acetyl transferase 1	ENSMUSG00000025283	-0.42759	7.95293	-4.39886	0.000926184	0.00538515	-1.06364
10511042	C030017K20Rik	RIKEN cDNA C030017K20 gene	ENSMUSG00000078490	0.427549	6.8421	5.90851	8.01975e-05	0.000904323	1.4661
10447349	Cript	cysteine-rich PDZ-binding protein	ENSMUSG00000024146	0.42746	9.62547	7.46204	8.95618e-06	0.000209921	3.74162
10552299	Gm4884	predicted gene 4884	ENSMUSG00000048312	-0.426332	5.27078	-3.1449	0.00872258	0.0294691	-3.34016
10526553	Vgf	VGF nerve growth factor inducible	ENSMUSG00000037428	-0.425965	10.5389	-9.14934	1.14713e-06	5.63411e-05	5.86509
10600210	Slc6a8	solute carrier family 6 (neurotransmitter transporter, creatine), member 8	ENSMUSG00000019558	-0.425469	8.66522	-7.43881	9.23369e-06	0.000215084	3.70998
10394366	Atad2b	ATPase family, AAA domain containing 2B	ENSMUSG00000052812	0.425375	8.49938	6.14595	5.61861e-05	0.000698393	1.83549
10575619	Terf2ip	telomeric repeat binding factor 2, interacting protein	ENSMUSG00000033430	0.424555	8.32785	7.36671	1.01552e-05	0.000225818	3.61134
10510241	Gm13154	predicted gene 13154	ENSMUSG00000065999	0.424273	6.56905	5.15684	0.000260607	0.00212443	0.244434
10551104	Tmem145	transmembrane protein 145	ENSMUSG00000043843	0.423997	8.10379	5.11884	0.000277192	0.00221145	0.1806
10523727	Pkd2	polycystic kidney disease 2	ENSMUSG00000034462	-0.423808	9.24705	-9.7275	6.06036e-07	3.94939e-05	6.52026
10467139	Lipa	lysosomal acid lipase A	ENSMUSG00000024781	-0.423784	5.97214	-5.41962	0.00017105	0.00158107	0.680469
10363007	Ascc3	activating signal cointegrator 1 complex subunit 3	ENSMUSG00000038774	0.423691	10.3741	8.56981	2.24564e-06	8.61136e-05	5.17292
10542093	Nrip2	nuclear receptor interacting protein 2	ENSMUSG00000001520	0.423615	8.69554	6.96867	1.73683e-05	0.000321528	3.05453
10367507	Olfr792	olfactory receptor 792	ENSMUSG00000094496	-0.423033	4.24235	-2.66418	0.0210622	0.0592306	-4.21063
10411751	Slc30a5	solute carrier family 30 (zinc transporter), member 5	ENSMUSG00000021629	0.422908	11.3362	9.10205	1.21026e-06	5.75717e-05	5.80997
10472916	Cdca7	cell division cycle associated 7	ENSMUSG00000055612	-0.422544	7.91314	-5.31219	0.000202941	0.00177774	0.503358
10371907	Nedd1	neural precursor cell expressed, developmentally down-regulated gene 1	ENSMUSG00000019988	0.422269	8.65224	9.14976	1.14658e-06	5.63411e-05	5.86558
10605315	Lage3	L antigen family, member 3	ENSMUSG00000015289	-0.42204	8.80201	-6.78443	2.24169e-05	0.000375524	2.78963
10428736	Derl1	Der1-like domain family, member 1	ENSMUSG00000022365	-0.422036	11.1588	-8.29186	3.13725e-06	0.000104278	4.82761
10356240	Slc16a14	solute carrier family 16 (monocarboxylic acid transporters), member 14	ENSMUSG00000026220	0.421489	8.03305	6.60518	2.88553e-05	0.000442004	2.52747
10502881	St6galnac5	ST6 (alpha-N-acetyl-neuraminyl-2,3-beta-galactosyl-1,3)-N-acetylgalactosaminide alpha-2,6-sialyltransferase 5	ENSMUSG00000039037	0.421478	8.05244	6.79114	2.22078e-05	0.000372575	2.79936
10560089	Vmn1r86	vomeronasal 1 receptor 86	ENSMUSG00000070816	-0.421261	6.38435	-3.10477	0.00938866	0.0312604	-3.41354
10423274	Cdh18	cadherin 18	ENSMUSG00000040420	-0.420983	5.70887	-5.10323	0.000284325	0.00224789	0.154314
10480676	Grin1	glutamate receptor, ionotropic, NMDA1 (zeta 1)	ENSMUSG00000026959	-0.420866	8.62661	-6.68908	2.56257e-05	0.000408634	2.65073
10495120	Ovgp1	oviductal glycoprotein 1	ENSMUSG00000074340	0.420696	8.22151	4.82395	0.00045048	0.00314422	-0.321243
10506274	Dnajc6	DnaJ (Hsp40) homolog, subfamily C, member 6	ENSMUSG00000028528	-0.420696	6.83511	-6.18491	5.30389e-05	0.00067036	1.89535
10408329	Top2a	topoisomerase (DNA) II alpha	ENSMUSG00000020914	-0.420689	9.07878	-5.4031	0.000175588	0.0016068	0.653338
10572271	Tm6sf2	transmembrane 6 superfamily member 2	ENSMUSG00000036151	0.420491	7.73326	4.59904	0.000657655	0.00415605	-0.711392
10487987	Lrrn4	leucine rich repeat neuronal 4	ENSMUSG00000043110	0.420252	7.54238	6.09283	6.08005e-05	0.000735477	1.75355
10364916	Sppl2b	signal peptide peptidase like 2B	ENSMUSG00000035206	-0.420005	9.76875	-9.31572	9.51674e-07	5.18318e-05	6.05714
10549276	Bhlhe41	basic helix-loop-helix family, member e41	ENSMUSG00000030256	-0.419763	5.99419	-4.67341	0.000579873	0.00379425	-0.581697
10406626	Homer1	homer homolog 1 (Drosophila)	ENSMUSG00000007617	0.419679	9.32725	9.48127	7.92298e-07	4.73936e-05	6.24539
10467038	Gm6642	ubiquitin-like 5 pseudogene	NA	-0.419284	5.67967	-3.94738	0.00204137	0.00953372	-1.87297
10606257	Mir384	microRNA 384	ENSMUSG00000065499	-0.419066	4.32097	-2.45985	0.030556	0.0787401	-4.57116
10574996	Prmt7	protein arginine N-methyltransferase 7	ENSMUSG00000060098	0.418582	9.61746	8.32086	3.02854e-06	0.000102952	4.86406
10401673	Tgfb3	transforming growth factor, beta 3	ENSMUSG00000021253	-0.418516	7.29369	-6.39709	3.88895e-05	0.000543943	2.21757
10578690	Neil3	nei like 3 (E. coli)	ENSMUSG00000039396	0.418325	9.08037	6.99113	1.68414e-05	0.000315398	3.0865
10583316	Taf1d	TATA box binding protein (Tbp)-associated factor, RNA polymerase I, D	ENSMUSG00000031939	0.41812	12.2866	9.06831	1.25758e-06	5.88298e-05	5.7705
10488020	Tmx4	thioredoxin-related transmembrane protein 4	ENSMUSG00000034723	-0.417854	11.7501	-8.61774	2.12156e-06	8.36311e-05	5.23158
10501222	Gstm2	glutathione S-transferase, mu 2	ENSMUSG00000040562	-0.41772	8.67439	-4.4962	0.000783628	0.00472692	-0.891795
10508800	Gm3579	predicted gene 3579	NA	0.41707	7.84662	4.4918	0.000789552	0.00474742	-0.899542
10573865	Gm3579	predicted gene 3579	NA	0.41707	7.84662	4.4918	0.000789552	0.00474742	-0.899542
10410560	Trip13	thyroid hormone receptor interactor 13	ENSMUSG00000021569	0.416548	9.20405	7.91171	5.02387e-06	0.00014339	4.34059
10530223	Ube2k	ubiquitin-conjugating enzyme E2K	ENSMUSG00000029203	-0.4165	10.234	-4.12274	0.00149756	0.00752719	-1.55643
10367828	Grm1	glutamate receptor, metabotropic 1	ENSMUSG00000019828	-0.416307	7.31846	-6.91635	1.86653e-05	0.000332963	2.97977
10439126	Itgb5	integrin beta 5	ENSMUSG00000022817	-0.416242	8.46701	-4.93893	0.000372239	0.00273095	-0.124222
10593492	Zc3h12c	zinc finger CCCH type containing 12C	ENSMUSG00000035164	0.41584	8.45903	6.66148	2.66435e-05	0.000418631	2.61028
10601771	Armcx1	armadillo repeat containing, X-linked 1	ENSMUSG00000033460	0.415778	6.95683	4.53735	0.000730442	0.00448774	-0.819471
10592856	Ccdc84	coiled-coil domain containing 84	ENSMUSG00000043923	0.415707	9.53394	7.3684	1.01325e-05	0.000225759	3.61366
10466972	Ranbp6	RAN binding protein 6	ENSMUSG00000074909	0.41567	8.79461	7.93111	4.90266e-06	0.000141542	4.36587
10582981	Tfdp1	transcription factor Dp 1	ENSMUSG00000038482	0.415292	10.9848	8.57168	2.24065e-06	8.61136e-05	5.17522
10532819	Kctd10	potassium channel tetramerisation domain containing 10	ENSMUSG00000001098	-0.415255	8.11314	-6.26999	4.67995e-05	0.000616375	2.02531
10593526	Atm	ataxia telangiectasia mutated homolog (human)	ENSMUSG00000034218	0.41497	8.65043	8.74474	1.82702e-06	7.43603e-05	5.38575
10352166	Cnst	consortin, connexin sorting protein	ENSMUSG00000038949	0.414903	8.88906	8.95584	1.43024e-06	6.47572e-05	5.63805
10589800	Clasp2	CLIP associating protein 2	ENSMUSG00000033392	0.414476	9.88042	9.35415	9.11828e-07	5.06402e-05	6.10109
10474915	Gchfr	GTP cyclohydrolase I feedback regulator	ENSMUSG00000046814	-0.414374	8.03535	-5.66619	0.000116249	0.00118134	1.0809
10382106	Milr1	mast cell immunoglobulin like receptor 1	ENSMUSG00000040528	0.414092	8.18208	5.43945	0.000165766	0.00154834	0.712987
10525086	Slc8b1	solute carrier family 8 (sodium/lithium/calcium exchanger), member B1	ENSMUSG00000032754	-0.413901	9.02064	-9.81299	5.52888e-07	3.73249e-05	6.61429
10608719	Plekhn1	pleckstrin homology domain containing, family N member 1	ENSMUSG00000078485	0.413685	7.32645	8.25842	3.26787e-06	0.000107311	4.78545
10457862	Rprd1a	regulation of nuclear pre-mRNA domain containing 1A	ENSMUSG00000040446	0.413329	8.9523	6.99135	1.68362e-05	0.000315398	3.08682
10454993	Hars2	histidyl-tRNA synthetase 2, mitochondrial (putative)	ENSMUSG00000019143	0.413042	8.60734	7.7314	6.31675e-06	0.000166002	4.10345
10385118	Dock2	dedicator of cyto-kinesis 2	ENSMUSG00000020143	0.413024	8.18266	7.20518	1.25962e-05	0.000259142	3.3879
10583297	Taf1d	TATA box binding protein (Tbp)-associated factor, RNA polymerase I, D	ENSMUSG00000031939	0.41301	10.307	6.71773	2.46129e-05	0.00039926	2.6926
10494832	Sike1	suppressor of IKBKE 1	ENSMUSG00000027854	0.412827	9.07726	5.13827	0.00026858	0.00215514	0.213254
10382136	1810010H24Rik	RIKEN cDNA 1810010H24 gene	NA	0.412311	9.86845	4.30858	0.00108265	0.00595987	-1.22394
10594144	Bbs4	Bardet-Biedl syndrome 4 (human)	ENSMUSG00000025235	0.412267	7.74702	9.62374	6.78041e-07	4.2468e-05	6.40517
10573823	Chd9	chromodomain helicase DNA binding protein 9	ENSMUSG00000056608	0.412041	9.74803	6.79159	2.2194e-05	0.000372575	2.80001
10410375	Zfp85	zinc finger protein 85	ENSMUSG00000058331	0.411985	5.69219	3.04572	0.0104628	0.0340427	-3.52136
10572170	D130040H23Rik	RIKEN cDNA D130040H23 gene	ENSMUSG00000079038	0.411811	7.31598	5.87867	8.39123e-05	0.000934809	1.41911
10582978	Msantd4	Myb/SANT-like DNA-binding domain containing 4 with coiled-coils	ENSMUSG00000041124	0.411748	8.31849	7.23004	1.2183e-05	0.000253416	3.4225
10588192	Msl2	male-specific lethal 2 homolog (Drosophila)	ENSMUSG00000066415	0.411581	10.395	7.11723	1.4183e-05	0.000283518	3.2648
10375402	Adam19	a disintegrin and metallopeptidase domain 19 (meltrin beta)	ENSMUSG00000011256	-0.411578	9.54417	-7.37225	1.0081e-05	0.000225503	3.61894
10507539	Elovl1	elongation of very long chain fatty acids (FEN1/Elo2, SUR4/Elo3, yeast)-like 1	ENSMUSG00000006390	-0.411573	10.7824	-7.41801	9.49006e-06	0.000218795	3.68159
10575376	Cmtr2	cap methyltransferase 2	ENSMUSG00000046441	0.411467	8.88942	6.34115	4.218e-05	0.000572075	2.13322
10407387	Gm7120	predicted gene 7120	c("ENSMUSG00000074634", "ENSMUSG00000094114")	0.411449	9.82159	8.20249	3.49947e-06	0.000111449	4.71467
10580457	N4bp1	NEDD4 binding protein 1	ENSMUSG00000031652	0.410904	9.93221	8.57682	2.227e-06	8.59837e-05	5.18153
10580183	Ier2	immediate early response 2	ENSMUSG00000053560	0.410541	7.89754	6.02011	6.77808e-05	0.000801008	1.64071
10429216	Fam135b	family with sequence similarity 135, member B	ENSMUSG00000036800	0.410495	7.49365	4.86981	0.000417381	0.00298576	-0.242454
10402390	Serpina1b	serine (or cysteine) preptidase inhibitor, clade A, member 1B	ENSMUSG00000071178	-0.410482	5.2602	-3.34915	0.00600293	0.0219161	-2.96589
10582162	Cotl1	coactosin-like 1 (Dictyostelium)	ENSMUSG00000031827	-0.410305	9.08573	-5.81297	9.27477e-05	0.00100445	1.31522
10568131	Pagr1a	PAXIP1 associated glutamate rich protein 1A	ENSMUSG00000030680	0.410222	9.98696	8.60362	2.15732e-06	8.44502e-05	5.21433
10537787	Tas2r135	taste receptor, type 2, member 135	ENSMUSG00000056203	0.409973	7.41954	3.58813	0.00388798	0.0155381	-2.52775
10500253	Prpf3	PRP3 pre-mRNA processing factor 3 homolog (yeast)	ENSMUSG00000015748	0.409915	8.86845	6.70198	2.51641e-05	0.000403557	2.6696
10574765	Lrrc36	leucine rich repeat containing 36	ENSMUSG00000054320	0.409451	7.59757	5.79501	9.53303e-05	0.00102189	1.28672
10529034	Cgref1	cell growth regulator with EF hand domain 1	ENSMUSG00000029161	0.409132	7.62769	4.17242	0.0013726	0.00711192	-1.46722
10578904	Cpe	carboxypeptidase E	ENSMUSG00000037852	0.408426	9.72418	7.58633	7.61539e-06	0.000187868	3.90973
10495596	Frrs1	ferric-chelate reductase 1	ENSMUSG00000033386	-0.408178	8.7227	-7.83597	5.52862e-06	0.000151504	4.24147
10444890	Ier3	immediate early response 3	ENSMUSG00000003541	-0.408154	8.27571	-5.82715	9.07605e-05	0.00098693	1.33769
10408475	E2f3	E2F transcription factor 3	ENSMUSG00000016477	0.407981	8.14058	5.77775	9.78849e-05	0.00104109	1.25928
10440238	Nsun3	NOL1/NOP2/Sun domain family member 3	ENSMUSG00000050312	0.407902	9.46102	6.44751	3.61573e-05	0.000514694	2.29322
10600814	Gspt2	G1 to S phase transition 2	ENSMUSG00000071723	-0.407344	6.52051	-3.63346	0.00358212	0.0145993	-2.44478
10431017	Ttll1	tubulin tyrosine ligase-like 1	ENSMUSG00000022442	-0.407269	10.0614	-9.96553	4.70109e-07	3.33334e-05	6.78032
10486102	Gpr176	G protein-coupled receptor 176	ENSMUSG00000040133	-0.407118	6.67211	-6.24821	4.83184e-05	0.00062976	1.99214
10511510	Ints8	integrator complex subunit 8	ENSMUSG00000040738	0.407043	8.6401	7.68286	6.72272e-06	0.000173437	4.03892
10432256	Arf3	ADP-ribosylation factor 3	ENSMUSG00000051853	-0.406996	10.0084	-8.90239	1.52106e-06	6.73217e-05	5.57464
10415319	Irf9	interferon regulatory factor 9	ENSMUSG00000002325	0.406649	7.85967	7.38233	9.94759e-06	0.00022433	3.63276
10412385	Mrps30	mitochondrial ribosomal protein S30	ENSMUSG00000021731	0.406261	8.72664	7.81519	5.67643e-06	0.000154089	4.21415
10493690	Nup210l	nucleoporin 210-like	ENSMUSG00000027939	0.40621	5.48818	4.4452	0.000855225	0.00505336	-0.981712
10588007	Tfdp2	transcription factor Dp 2	ENSMUSG00000032411	0.406101	8.40806	6.66101	2.66611e-05	0.000418631	2.6096
10410959	Atg10	autophagy related 10	ENSMUSG00000021619	0.405716	10.4089	6.87768	1.96902e-05	0.000344908	2.92428
10572253	Sugp1	SURP and G patch domain containing 1	ENSMUSG00000011306	0.405678	9.09555	7.47959	8.75248e-06	0.000206033	3.76547
10488806	Eif2s2	eukaryotic translation initiation factor 2, subunit 2 (beta)	ENSMUSG00000074656	0.405544	9.19626	5.24653	0.000225474	0.00191776	0.394324
10364430	Vmn2r81	vomeronasal 2, receptor 81	ENSMUSG00000055515	-0.405449	3.69751	-2.78362	0.0169253	0.0497306	-3.99664
10359255	Brinp2	bone morphogenic protein/retinoic acid inducible neural-specific 2	ENSMUSG00000004031	-0.405296	8.09458	-5.62158	0.000124583	0.00124738	1.00909
10583310	Taf1d	TATA box binding protein (Tbp)-associated factor, RNA polymerase I, D	ENSMUSG00000031939	0.405219	8.7951	4.29319	0.00111196	0.00607673	-1.25134
10483865	Fkbp7	FK506 binding protein 7	ENSMUSG00000002732	-0.404856	8.6997	-4.60948	0.000646114	0.00410382	-0.693156
10426557	Pfkm	phosphofructokinase, muscle	ENSMUSG00000033065	-0.404456	9.55806	-8.20269	3.49861e-06	0.000111449	4.71492
10410273	Zfp708	zinc finger protein 708	ENSMUSG00000058883	0.404169	6.31816	5.5791	0.000133109	0.00130834	0.940442
10387699	Acap1	ArfGAP with coiled-coil, ankyrin repeat and PH domains 1	ENSMUSG00000001588	0.403709	7.32352	6.93505	1.81903e-05	0.00032994	3.00653
10373778	Morc2a	microrchidia 2A	ENSMUSG00000034543	0.403692	10.0032	7.72463	6.37171e-06	0.000167057	4.09447
10584024	Opcml	opioid binding protein/cell adhesion molecule-like	ENSMUSG00000062257	0.403607	8.8627	6.01051	6.87638e-05	0.000810076	1.62577
10345981	Ercc5	excision repair cross-complementing rodent repair deficiency, complementation group 5	ENSMUSG00000026048	0.403573	9.22824	9.28292	9.87167e-07	5.27456e-05	6.01951
10429926	Dgat1	diacylglycerol O-acyltransferase 1	ENSMUSG00000022555	-0.403509	9.33213	-5.03291	0.000318929	0.00243605	0.0355368
10605766	Maged1	melanoma antigen, family D, 1	ENSMUSG00000025151	-0.403483	11.1777	-8.21851	3.43139e-06	0.000110215	4.73498
10568605	Ctbp2	C-terminal binding protein 2	ENSMUSG00000030970	0.403431	8.97703	7.3974	9.75149e-06	0.000222986	3.65341
10388745	Lsm6	LSM6 homolog, U6 small nuclear RNA associated (S. cerevisiae)	ENSMUSG00000031683	0.403242	8.29537	4.86346	0.000421809	0.00300789	-0.253352
10451879	Zfp119a	zinc finger protein 119a	ENSMUSG00000057835	0.403056	6.46428	4.36888	0.00097536	0.00556695	-1.11679
10400326	Eapp	E2F-associated phosphoprotein	ENSMUSG00000054302	0.403011	7.97512	4.37922	0.000958097	0.00549699	-1.09844
10401852	Cep128	centrosomal protein 128	ENSMUSG00000061533	0.40301	6.89698	7.83504	5.53513e-06	0.000151504	4.24025
10404000	Vmn1r201	vomeronasal 1 receptor 201	ENSMUSG00000094898	-0.402703	3.3184	-2.86169	0.0146674	0.0444517	-3.85578
10383758	Tug1	taurine upregulated gene 1	ENSMUSG00000056579	0.402545	10.7498	8.22387	3.40892e-06	0.000110215	4.74177
10362210	Med23	mediator complex subunit 23	ENSMUSG00000019984	0.402332	10.0257	8.84493	1.62568e-06	6.91619e-05	5.5061
10378436	Olfr59	olfactory receptor 59	ENSMUSG00000070374	-0.4021	5.61526	-3.05445	0.0102966	0.0336182	-3.50543
10536563	Cftr	cystic fibrosis transmembrane conductance regulator	ENSMUSG00000041301	0.401747	8.61842	6.70539	2.5044e-05	0.000402776	2.67457
10406676	Lhfpl2	lipoma HMGIC fusion partner-like 2	ENSMUSG00000045312	0.401429	8.64416	5.44269	0.000164919	0.00154456	0.718295
10453461	Fbxo11	F-box protein 11	ENSMUSG00000005371	0.40128	9.62594	9.01908	1.33023e-06	6.12123e-05	5.71269
10591853	Tbx20	T-box 20	ENSMUSG00000031965	0.401126	9.26703	6.25658	4.77284e-05	0.00062496	2.00489
10533875	Ncor2	nuclear receptor co-repressor 2	ENSMUSG00000029478	-0.400928	9.32704	-9.37253	8.93405e-07	5.01107e-05	6.12206
10397145	Acot2	acyl-CoA thioesterase 2	ENSMUSG00000021226	0.400618	10.0402	6.91114	1.88001e-05	0.000334793	2.9723
10518358	2610305D13Rik	RIKEN cDNA 2610305D13 gene	ENSMUSG00000066000	0.400604	7.28634	2.49516	0.0286601	0.0750033	-4.50945
10371676	Utp20	UTP20, small subunit (SSU) processome component, homolog (yeast)	ENSMUSG00000004356	0.400511	9.38427	8.79478	1.72329e-06	7.19699e-05	5.446
10459229	Pcyox1l	prenylcysteine oxidase 1 like	ENSMUSG00000024579	-0.400383	9.96031	-7.54464	8.03947e-06	0.000196609	3.85356
10575512	Cog4	component of oligomeric golgi complex 4	ENSMUSG00000031753	0.400147	9.62011	9.23599	1.04045e-06	5.33183e-05	5.96547
10412335	Isl1	ISL1 transcription factor, LIM/homeodomain	ENSMUSG00000042258	0.400139	8.49368	6.37089	4.03952e-05	0.000556743	2.17812
10526502	Rabl5	RAB, member of RAS oncogene family-like 5	ENSMUSG00000007987	-0.399396	8.69087	-7.75411	6.13587e-06	0.000163151	4.13354
10516051	Cap1	CAP, adenylate cyclase-associated protein 1 (yeast)	ENSMUSG00000028656	-0.398865	9.25142	-6.45782	3.56244e-05	0.000510979	2.30864
10424781	Grina	glutamate receptor, ionotropic, N-methyl D-aspartate-associated protein 1 (glutamate binding)	ENSMUSG00000022564	-0.398827	12.5224	-6.26764	4.69604e-05	0.000617772	2.02174
10430145	Rbfox2	RNA binding protein, fox-1 homolog (C. elegans) 2	ENSMUSG00000033565	-0.398451	10.0829	-8.76902	1.77589e-06	7.30706e-05	5.41501
10395457	Etv1	ets variant gene 1	ENSMUSG00000004151	0.398281	8.22053	5.28358	0.000212455	0.00183965	0.455907
10515832	Olfr1329	olfactory receptor 1329	ENSMUSG00000096705	0.398264	6.68418	3.8855	0.00227894	0.0103225	-1.98522
10405074	Nol8	nucleolar protein 8	ENSMUSG00000021392	0.398067	9.49929	7.45635	9.02342e-06	0.000211058	3.73387
10369702	Tet1	tet methylcytosine dioxygenase 1	ENSMUSG00000047146	-0.39786	6.51984	-4.55086	0.000713804	0.00440472	-0.795753
10443021	Atp6v0e	ATPase, H+ transporting, lysosomal V0 subunit E	ENSMUSG00000015575	-0.397726	10.6753	-7.66427	6.88549e-06	0.000176425	4.01413
10518751	Car6	carbonic anhydrase 6	ENSMUSG00000028972	-0.397682	9.34253	-4.31134	0.00107749	0.00595637	-1.21903
10580282	Junb	jun B proto-oncogene	ENSMUSG00000052837	0.397567	8.17668	5.91748	7.91151e-05	0.000895525	1.48021
10595171	Mb21d1	Mab-21 domain containing 1	ENSMUSG00000032344	0.397416	5.92112	5.48077	0.000155301	0.00146639	0.780574
10458046	Nrep	neuronal regeneration related protein	ENSMUSG00000042834	-0.397337	8.22948	-6.00629	6.92006e-05	0.000813522	1.61919
10380629	Hoxb8	homeobox B8	ENSMUSG00000056648	-0.397337	5.73895	-4.586	0.000672379	0.00422071	-0.734196
10471721	Ptgs1	prostaglandin-endoperoxide synthase 1	ENSMUSG00000047250	-0.397294	10.8562	-6.61053	2.86371e-05	0.000439258	2.53536
10586724	Narg2	NMDA receptor-regulated gene 2	ENSMUSG00000032235	0.396891	8.12992	8.45951	2.56178e-06	9.25691e-05	5.03695
10368886	Foxo3	forkhead box O3	ENSMUSG00000048756	0.396462	8.62759	7.62724	7.22244e-06	0.000182018	3.96463
10591241	Zfp426	zinc finger protein 426	ENSMUSG00000059475	0.396445	8.22892	5.62676	0.000123583	0.00124177	1.01745
10570068	Col4a2	collagen, type IV, alpha 2	ENSMUSG00000031503	-0.39619	8.98644	-7.1909	1.28403e-05	0.00026225	3.36799
10525657	Denr	density-regulated protein	ENSMUSG00000023106	-0.396185	8.58344	-6.68035	2.59431e-05	0.000412308	2.63795
10557831	Kat8	K(lysine) acetyltransferase 8	ENSMUSG00000030801	0.396118	9.05445	7.62747	7.22036e-06	0.000182018	3.96493
10542040	Parp11	poly (ADP-ribose) polymerase family, member 11	ENSMUSG00000037997	0.396029	6.81998	7.43958	9.22435e-06	0.000215084	3.71103
10544487	Tpk1	thiamine pyrophosphokinase	ENSMUSG00000029735	0.395974	7.4368	4.1062	0.00154175	0.00770463	-1.58618
10406934	Etv1	ets variant gene 1	ENSMUSG00000004151	0.395906	8.96461	7.87145	5.28569e-06	0.000148212	4.28799
10590968	Ankrd49	ankyrin repeat domain 49	ENSMUSG00000031931	0.395859	9.37107	7.50724	8.44153e-06	0.000201205	3.80297
10534441	Pom121	nuclear pore membrane protein 121	ENSMUSG00000053293	-0.395272	9.55268	-6.16223	5.48477e-05	0.000686936	1.86053
10556381	Mical2	microtubule associated monooxygenase, calponin and LIM domain containing 2	ENSMUSG00000038244	-0.395158	7.73699	-5.70147	0.000110075	0.00113414	1.13751
10548931	Slc15a5	solute carrier family 15, member 5	ENSMUSG00000044378	0.394998	8.45074	7.41965	9.46957e-06	0.000218795	3.68383
10585249	Ppp2r1b	protein phosphatase 2, regulatory subunit A, beta	ENSMUSG00000032058	0.394583	8.16456	6.22927	4.96822e-05	0.000643074	1.96323
10417628	Cadps	Ca2+-dependent secretion activator	ENSMUSG00000054423	0.394552	6.25102	5.26595	0.000218547	0.00187393	0.426635
10476443	Plcb4	phospholipase C, beta 4	ENSMUSG00000039943	0.394374	10.4714	8.04775	4.23705e-06	0.000127723	4.51686
10585494	Ube2q2	ubiquitin-conjugating enzyme E2Q (putative) 2	ENSMUSG00000032307	0.394315	9.15755	6.67776	2.6038e-05	0.000412872	2.63415
10587508	Ttk	Ttk protein kinase	ENSMUSG00000038379	0.394187	8.3499	6.38565	3.95394e-05	0.00055033	2.20036
10356968	Pam	peptidylglycine alpha-amidating monooxygenase	ENSMUSG00000026335	0.394052	9.25626	8.88713	1.54813e-06	6.79128e-05	5.55647
10587299	Ick	intestinal cell kinase	ENSMUSG00000009828	0.394045	8.34557	6.89427	1.92432e-05	0.000341113	2.94811
10582229	Fbxo31	F-box protein 31	ENSMUSG00000052934	0.393994	9.03721	8.12305	3.85922e-06	0.000120523	4.61348
10353871	Lman2l	lectin, mannose-binding 2-like	ENSMUSG00000001143	-0.3938	10.1626	-8.55635	2.28187e-06	8.72061e-05	5.15641
10482336	Lrp1b	low density lipoprotein-related protein 1B (deleted in tumors)	ENSMUSG00000049252	0.393749	6.43039	8.0439	4.25739e-06	0.000127994	4.51191
10463997	Pdcd4	programmed cell death 4	ENSMUSG00000024975	0.393705	9.56458	5.49153	0.000152693	0.00145026	0.798129
10469018	Gm10862	predicted gene 10862	NA	-0.393687	7.01134	-5.38117	0.00018181	0.00164636	0.617258
10587023	Rab27a	RAB27A, member RAS oncogene family	ENSMUSG00000032202	0.393246	8.64572	6.17172	5.40828e-05	0.000679744	1.87511
10412421	Zfp131	zinc finger protein 131	ENSMUSG00000094870	0.393183	9.42341	7.41334	9.54866e-06	0.000219697	3.6752
10431170	5031439G07Rik	RIKEN cDNA 5031439G07 gene	ENSMUSG00000036046	-0.393047	10.017	-9.32414	9.42781e-07	5.15967e-05	6.06679
10469622	Gpr158	G protein-coupled receptor 158	ENSMUSG00000045967	-0.39304	5.83183	-4.37082	0.000972092	0.00556031	-1.11334
10427918	Fam105a	family with sequence similarity 105, member A	ENSMUSG00000056069	-0.392967	6.96008	-5.25461	0.000222565	0.00189803	0.407768
10406953	Trim23	tripartite motif-containing 23	ENSMUSG00000021712	0.392927	8.94946	7.91821	4.98288e-06	0.000142792	4.34907
10425880	Prr5	proline rich 5 (renal)	ENSMUSG00000036106	-0.39288	9.19921	-7.36868	1.01288e-05	0.000225759	3.61404
10596277	Dnajc13	DnaJ (Hsp40) homolog, subfamily C, member 13	ENSMUSG00000032560	0.392493	9.51924	8.89896	1.5271e-06	6.73217e-05	5.57056
10409222	Shc3	src homology 2 domain-containing transforming protein C3	ENSMUSG00000021448	-0.392363	7.95914	-8.10468	3.94794e-06	0.000121718	4.58997
10563077	Rcn3	reticulocalbin 3, EF-hand calcium binding domain	ENSMUSG00000019539	0.392143	10.4157	4.81632	0.000456244	0.00316802	-0.334368
10432032	Vdr	vitamin D receptor	ENSMUSG00000022479	0.391943	7.85453	6.98377	1.7012e-05	0.000315969	3.07604
10411722	Mrps36	mitochondrial ribosomal protein S36	ENSMUSG00000061474	0.391814	8.7033	4.21899	0.00126529	0.00670155	-1.38382
10568982	Zfp941	zinc finger protein 941	ENSMUSG00000060314	0.391641	9.51024	9.65364	6.56392e-07	4.1574e-05	6.43844
10391407	Coa3	cytochrome C oxidase assembly factor 3	ENSMUSG00000017188	-0.39153	9.26878	-7.68297	6.72175e-06	0.000173437	4.03907
10572663	Pgls	6-phosphogluconolactonase	ENSMUSG00000031807	0.391195	8.82948	8.22624	3.39903e-06	0.000110215	4.74477
10542355	Emp1	epithelial membrane protein 1	ENSMUSG00000030208	-0.390945	9.08858	-4.85541	0.000427492	0.00303307	-0.267171
10394560	Smc6	structural maintenance of chromosomes 6	ENSMUSG00000020608	0.390923	9.38007	5.53609	0.000142372	0.00137541	0.870683
10590597	Sacm1l	SAC1 (suppressor of actin mutations 1, homolog)-like (S. cerevisiae)	ENSMUSG00000025240	0.390912	8.9783	7.02349	1.61119e-05	0.000305286	3.13246
10537102	Exoc4	exocyst complex component 4	ENSMUSG00000029763	0.390609	9.09805	7.53351	8.15699e-06	0.000198989	3.83852
10591626	Dock6	dedicator of cytokinesis 6	ENSMUSG00000032198	0.390429	8.73222	6.67053	2.6305e-05	0.000415367	2.62356
10417787	Gng2	guanine nucleotide binding protein (G protein), gamma 2	ENSMUSG00000043004	-0.390257	9.75099	-5.57433	0.000134105	0.00131469	0.93271
10454632	Camk4	calcium/calmodulin-dependent protein kinase IV	ENSMUSG00000038128	-0.390126	8.33896	-6.20298	5.16434e-05	0.000662375	1.92303
10530841	Igfbp7	insulin-like growth factor binding protein 7	ENSMUSG00000036256	-0.389854	11.088	-6.19655	5.21354e-05	0.000665656	1.91319
10517169	Sh3bgrl3	SH3 domain binding glutamic acid-rich protein-like 3	ENSMUSG00000028843	-0.389649	11.4408	-8.16039	3.68544e-06	0.000116386	4.66113
10411126	Jmy	junction-mediating and regulatory protein	ENSMUSG00000021690	0.389596	8.67884	6.0664	6.32447e-05	0.000759494	1.71263
10532630	Adrbk2	adrenergic receptor kinase, beta 2	ENSMUSG00000042249	-0.389575	9.38639	-8.08047	4.06823e-06	0.000124634	4.55892
10607225	Lrch2	leucine-rich repeats and calponin homology (CH) domain containing 2	ENSMUSG00000031290	0.389368	6.7364	4.7231	0.000533322	0.00355149	-0.495417
10376060	Irf1	interferon regulatory factor 1	ENSMUSG00000018899	0.389313	7.41599	5.701	0.000110155	0.00113414	1.13675
10427131	Soat2	sterol O-acyltransferase 2	ENSMUSG00000023045	-0.388731	8.96511	-7.22634	1.22436e-05	0.000254206	3.41736
10410576	Cep72	centrosomal protein 72	ENSMUSG00000021572	0.388545	7.21032	7.83292	5.55005e-06	0.000151504	4.23746
10594762	Fam81a	family with sequence similarity 81, member A	ENSMUSG00000032224	-0.388508	6.10009	-6.59257	2.93771e-05	0.000447565	2.50886
10597461	Cmtm7	CKLF-like MARVEL transmembrane domain containing 7	ENSMUSG00000032436	0.388431	8.33151	5.67489	0.000114693	0.00117124	1.09487
10505788	Acer2	alkaline ceramidase 2	ENSMUSG00000038007	-0.388188	6.17743	-5.15322	0.000262142	0.00213325	0.238359
10532150	Fam69a	family with sequence similarity 69, member A	ENSMUSG00000029270	-0.3877	8.5749	-7.0967	1.45833e-05	0.000287284	3.23591
10510399	Masp2	mannan-binding lectin serine peptidase 2	ENSMUSG00000028979	0.38756	8.79915	4.35787	0.000994086	0.0056517	-1.13632
10587419	Senp6	SUMO/sentrin specific peptidase 6	ENSMUSG00000034252	0.387365	9.69051	6.96091	1.75545e-05	0.000324101	3.04346
10585986	Myo9a	myosin IXa	ENSMUSG00000039585	0.387172	9.10992	6.19008	5.26356e-05	0.000669767	1.90327
10367282	Cnpy2	canopy 2 homolog (zebrafish)	ENSMUSG00000025381	-0.38711	9.00313	-7.2802	1.13925e-05	0.000242338	3.49209
10558773	B4galnt4	beta-1,4-N-acetyl-galactosaminyl transferase 4	ENSMUSG00000055629	0.387085	8.58473	6.31233	4.39892e-05	0.000586905	2.08961
10410892	Rasa1	RAS p21 protein activator 1	ENSMUSG00000021549	0.386984	10.2174	6.75081	2.34965e-05	0.000386151	2.74079
10347910	Fbxo36	F-box protein 36	ENSMUSG00000073633	-0.386968	8.85255	-6.24388	4.86263e-05	0.00063231	1.98554
10369688	Tet1	tet methylcytosine dioxygenase 1	ENSMUSG00000047146	-0.386915	5.95865	-5.21014	0.000239086	0.00200555	0.33364
10575961	Usp10	ubiquitin specific peptidase 10	ENSMUSG00000031826	0.386127	10.885	9.40792	8.5905e-07	4.88227e-05	6.16233
10462796	Kif11	kinesin family member 11	ENSMUSG00000012443	0.386004	9.90321	5.07275	0.00029881	0.00232695	0.10292
10442262	Zfp758	zinc finger protein 758	ENSMUSG00000044501	0.385805	5.67881	3.07543	0.00990777	0.0326037	-3.46714
10362511	Gstm3	glutathione S-transferase, mu 3	ENSMUSG00000004038	-0.385797	7.08586	-6.27899	4.61866e-05	0.000610149	2.03899
10411974	Ipo11	importin 11	ENSMUSG00000042590	0.385543	11.2527	9.7804	5.72528e-07	3.79687e-05	6.57854
10406419	Lysmd3	LysM, putative peptidoglycan-binding, domain containing 3	ENSMUSG00000035840	0.385413	9.2381	4.60833	0.000647367	0.00410715	-0.695152
10568593	Mettl10	methyltransferase like 10	ENSMUSG00000030960	0.385391	7.59339	4.54158	0.000725187	0.00446031	-0.812038
10381708	Fmnl1	formin-like 1	ENSMUSG00000055805	0.38529	8.97701	6.87084	1.98776e-05	0.000346904	2.91444
10515830	Olfr1333	olfactory receptor 1333	ENSMUSG00000073770	0.385058	7.03958	4.33649	0.00103154	0.00579448	-1.17429
10399973	Hdac9	histone deacetylase 9	ENSMUSG00000004698	-0.384827	7.39772	-5.03437	0.000318165	0.00243186	0.0380158
10572580	Use1	unconventional SNARE in the ER 1 homolog (S. cerevisiae)	ENSMUSG00000002395	0.384805	11.2178	6.86157	2.01346e-05	0.000349798	2.90111
10593413	2310030G06Rik	RIKEN cDNA 2310030G06 gene	ENSMUSG00000032062	0.384287	7.4747	4.31802	0.00106508	0.0059064	-1.20714
10561351	Zfp850	zinc finger protein 850	ENSMUSG00000096916	0.384131	6.72267	4.30861	0.00108259	0.00595987	-1.22387
10346607	Fzd7	frizzled homolog 7 (Drosophila)	ENSMUSG00000041075	-0.384103	7.78569	-5.8481	8.79067e-05	0.000965372	1.37085
10608663	Nlrp4g	NLR family, pyrin domain containing 4G	c("ENSMUSG00000079741", "ENSMUSG00000098512")	0.384063	6.99762	5.51434	0.000147316	0.00141228	0.835296
10471486	Eng	endoglin	ENSMUSG00000026814	-0.383773	8.80956	-7.26755	1.15865e-05	0.000246001	3.47458
10411199	Aggf1	angiogenic factor with G patch and FHA domains 1	ENSMUSG00000021681	0.383763	8.56957	6.50506	3.32866e-05	0.000484224	2.37912
10508405	Tmem54	transmembrane protein 54	ENSMUSG00000028786	-0.38371	7.43722	-5.81904	9.18913e-05	0.000997095	1.32484
10411915	Ppwd1	peptidylprolyl isomerase domain and WD repeat containing 1	ENSMUSG00000021713	0.383615	9.57816	6.76608	2.29994e-05	0.000380756	2.763
10590489	Zfp105	zinc finger protein 105	ENSMUSG00000057895	0.383564	8.23816	5.81063	9.30803e-05	0.00100452	1.3115
10569733	Arhgef18	rho/rac guanine nucleotide exchange factor (GEF) 18	ENSMUSG00000004568	0.383399	8.58025	7.93964	4.85037e-06	0.000141078	4.37697
10493640	Nup210l	nucleoporin 210-like	ENSMUSG00000027939	0.383288	6.3363	4.61628	0.000638704	0.00406822	-0.681274
10538150	Tmem176a	transmembrane protein 176A	ENSMUSG00000023367	-0.383247	8.02059	-7.1172	1.41835e-05	0.000283518	3.26476
10395252	Ccdc71l	coiled-coil domain containing 71 like	ENSMUSG00000090946	0.38317	6.85608	6.46246	3.53874e-05	0.000508874	2.31557
10415806	Fam124a	family with sequence similarity 124, member A	ENSMUSG00000035184	-0.383159	8.59173	-6.3391	4.23058e-05	0.000572088	2.13013
10421817	Naa16	N(alpha)-acetyltransferase 16, NatA auxiliary subunit	ENSMUSG00000022020	0.382857	8.23513	6.19784	5.20364e-05	0.000665145	1.91516
10495147	Dennd2d	DENN/MADD domain containing 2D	ENSMUSG00000027901	0.38188	7.31855	5.43371	0.000167278	0.00155987	0.703579
10521471	Ppp2r2c	protein phosphatase 2, regulatory subunit B, gamma	ENSMUSG00000029120	-0.381485	8.88657	-5.85693	8.67316e-05	0.000956763	1.38481
10495285	Sort1	sortilin 1	ENSMUSG00000068747	-0.381272	10.2694	-7.2351	1.21006e-05	0.000253044	3.42954
10573637	Phkb	phosphorylase kinase beta	ENSMUSG00000036879	0.381258	8.69124	7.25734	1.17457e-05	0.000248912	3.46042
10556957	BC030336	cDNA sequence BC030336	ENSMUSG00000046096	0.381124	8.8081	6.64846	2.71384e-05	0.000422012	2.59117
10411491	Tnpo1	transportin 1	ENSMUSG00000009470	0.380997	11.6409	7.81816	5.655e-06	0.000153996	4.21806
10574480	Car7	carbonic anhydrase 7	ENSMUSG00000031883	0.380942	8.3084	7.12451	1.40438e-05	0.000281726	3.27503
10580452	Siah1a	seven in absentia 1A	ENSMUSG00000036840	0.380916	7.91771	4.34165	0.00102236	0.00575439	-1.16511
10492558	Smc4	structural maintenance of chromosomes 4	ENSMUSG00000034349	0.38076	10.0695	6.35917	4.10888e-05	0.000562179	2.16044
10383799	Tcn2	transcobalamin 2	ENSMUSG00000020432	-0.380638	8.4096	-5.86165	8.61114e-05	0.000951762	1.39226
10367830	Grm1	glutamate receptor, metabotropic 1	ENSMUSG00000019828	-0.380492	9.06707	-9.0726	1.25145e-06	5.87871e-05	5.77553
10581813	Mlkl	mixed lineage kinase domain-like	ENSMUSG00000012519	0.380236	9.41248	8.2568	3.27434e-06	0.000107311	4.78341
10429802	Plec	plectin	ENSMUSG00000022565	-0.379991	9.3406	-8.27885	3.18739e-06	0.000105072	4.81122
10400072	Scin	scinderin	ENSMUSG00000002565	0.379654	6.77167	5.9197	7.88501e-05	0.000893423	1.48369
10464586	Gstp2	glutathione S-transferase, pi 2	c("ENSMUSG00000038155", "ENSMUSG00000097808")	-0.379641	9.51401	-6.94875	1.78504e-05	0.000328296	3.02611
10574471	Cmtm3	CKLF-like MARVEL transmembrane domain containing 3	ENSMUSG00000031875	0.379272	9.73644	6.00653	6.91759e-05	0.000813522	1.61956
10515826	Olfr1337	olfactory receptor 1337	ENSMUSG00000061075	0.379171	6.95114	4.86158	0.000423128	0.00300968	-0.256577
10577508	Ckap2	cytoskeleton associated protein 2	ENSMUSG00000037725	0.379054	9.28219	4.85281	0.000429343	0.00304046	-0.271631
10571860	Hand2	heart and neural crest derivatives expressed transcript 2	ENSMUSG00000038193	0.378968	10.9514	6.56298	3.06412e-05	0.000459373	2.46511
10408335	Aldh5a1	aldhehyde dehydrogenase family 5, subfamily A1	ENSMUSG00000035936	-0.378943	5.95139	-7.80166	5.7749e-06	0.00015613	4.19633
10555389	Ucp2	uncoupling protein 2 (mitochondrial, proton carrier)	ENSMUSG00000033685	-0.378872	9.91241	-6.09632	6.04851e-05	0.000733235	1.75895
10449608	Mdga1	MAM domain containing glycosylphosphatidylinositol anchor 1	ENSMUSG00000043557	0.37852	7.60084	5.75272	0.000101719	0.00107076	1.21941

## Sheet: Differ stable dali KD vs cont
ID	Symbol	Name	Ensembl	logFC	AveExpr	t	P.Value	adj.P.Val	B
10442069	Lix1	limb expression 1 homolog (chicken)	ENSMUSG00000047786	-3.02134	7.16755	-27.7599	5.08389e-12	1.43289e-08	17.4223
10607143	Capn6	calpain 6	ENSMUSG00000067276	-2.73102	7.81034	-29.7745	2.26845e-12	8.52483e-09	18.0402
10406782	Fam169a	family with sequence similarity 169, member A	ENSMUSG00000041817	-1.7654	7.62239	-21.9081	7.6703e-11	1.37778e-07	15.1754
10550790	Nlrp4e	NLR family, pyrin domain containing 4E	ENSMUSG00000045693	1.75161	5.77283	11.2502	1.29289e-07	1.40155e-05	8.10165
10369481	H2afy2	H2A histone family, member Y2	ENSMUSG00000020086	1.72205	6.96124	6.24672	4.84244e-05	0.000590584	2.0099
10443854	Cyp4f39	cytochrome P450, family 4, subfamily f, polypeptide 39	ENSMUSG00000061126	-1.65992	7.14549	-21.2283	1.09878e-10	1.54846e-07	14.8605
10594044	Islr	immunoglobulin superfamily containing leucine-rich repeat	ENSMUSG00000037206	-1.59177	9.47067	-30.9885	1.4307e-12	8.06483e-09	18.3817
10474373	Kcna4	potassium voltage-gated channel, shaker-related subfamily, member 4	ENSMUSG00000042604	-1.53233	6.63092	-17.6552	8.88467e-10	6.26036e-07	12.9622
10548892	Arhgdib	Rho, GDP dissociation inhibitor (GDI) beta	ENSMUSG00000030220	-1.52903	7.14412	-12.26	5.099e-08	8.13432e-06	9.03614
10455912	Isoc1	isochorismatase domain containing 1	ENSMUSG00000024601	-1.50199	10.194	-33.3483	6.13031e-13	6.91131e-09	18.9868
10469581	Etl4	enhancer trap locus 4	ENSMUSG00000036617	-1.36641	7.35876	-19.3326	3.18282e-10	3.2621e-07	13.908
10599174	Il13ra1	interleukin 13 receptor, alpha 1	ENSMUSG00000017057	-1.3522	6.42552	-15.1252	5.03452e-09	2.10219e-06	11.3139
10414228	1700024B05Rik	RIKEN cDNA 1700024B05 gene	ENSMUSG00000052334	-1.33781	7.53204	-20.9876	1.25128e-10	1.56744e-07	14.7457
10472350	Gca	grancalcin	ENSMUSG00000026893	-1.29425	5.59235	-13.5183	1.74822e-08	4.79727e-06	10.0986
10483131	Kcnh7	potassium voltage-gated channel, subfamily H (eag-related), member 7	ENSMUSG00000059742	-1.25906	6.42263	-19.5094	2.87042e-10	3.23612e-07	14.0018
10603768	Efhc2	EF-hand domain (C-terminal) containing 2	ENSMUSG00000025038	-1.24648	6.76706	-12.8924	2.94338e-08	5.92051e-06	9.58338
10419162	4930503E14Rik	RIKEN cDNA 4930503E14 gene	ENSMUSG00000072595	-1.2018	6.24191	-8.4619	2.55444e-06	8.60204e-05	5.05503
10455942	A730017C20Rik	RIKEN cDNA A730017C20 gene	ENSMUSG00000050875	-1.17558	6.86788	-12.7169	3.42002e-08	6.21892e-06	9.43428
10425726	Sept3	septin 3	ENSMUSG00000022456	1.14927	7.47327	11.3446	1.18162e-07	1.34111e-05	8.19244
10437205	Pcp4	Purkinje cell protein 4	ENSMUSG00000090223	-1.137	9.98831	-22.2168	6.53774e-11	1.37778e-07	15.3142
10594515	Rnu5g	RNA, U5G small nuclear	ENSMUSG00000095892	1.13293	4.82602	5.62262	0.000124382	0.00112814	1.03194
10395553	Nrcam	neuron-glia-CAM-related cell adhesion molecule	ENSMUSG00000020598	-1.1229	6.40432	-12.1274	5.73973e-08	8.42064e-06	8.91778
10416057	Clu	clusterin	ENSMUSG00000022037	-1.10303	7.91698	-11.3083	1.22309e-07	1.36526e-05	8.15765
10428089	Nipal2	NIPA-like domain containing 2	ENSMUSG00000038879	-1.05705	7.52423	-12.4108	4.4631e-08	7.63787e-06	9.16913
10445308	Cyp39a1	cytochrome P450, family 39, subfamily a, polypeptide 1	ENSMUSG00000023963	1.04695	6.78727	7.49091	8.62365e-06	0.000188052	3.79828
10382106	Milr1	mast cell immunoglobulin like receptor 1	ENSMUSG00000040528	1.01861	8.18208	13.3803	1.95738e-08	4.79727e-06	9.98719
10349319	Sctr	secretin receptor	ENSMUSG00000026387	1.00568	9.53369	19.0242	3.81932e-10	3.40805e-07	13.7418
10370833	Uqcr11	ubiquinol-cytochrome c reductase, complex III subunit XI	ENSMUSG00000020163	-1.00505	9.81839	-18.9518	3.98773e-10	3.40805e-07	13.7024
10529824	Prom1	prominin 1	ENSMUSG00000029086	-1.00343	6.20881	-8.50528	2.42514e-06	8.34408e-05	5.10855
10495243	Gstm5	glutathione S-transferase, mu 5	ENSMUSG00000004032	-0.997534	9.28655	-15.7586	3.1844e-09	1.56091e-06	11.7547
10411611	Naip5	NLR family, apoptosis inhibitory protein 5	ENSMUSG00000071203	0.996719	8.92364	16.2372	2.27805e-09	1.35172e-06	12.0746
10436590	2810055G20Rik	RIKEN cDNA 2810055G20 gene	ENSMUSG00000090386	-0.983083	4.97522	-5.7002	0.000110292	0.00104666	1.1565
10405355	Unc5a	unc-5 homolog A (C. elegans)	ENSMUSG00000025876	-0.967594	8.3406	-18.8526	4.2321e-10	3.40805e-07	13.648
10399892	Gpr22	G protein-coupled receptor 22	ENSMUSG00000044067	-0.966703	6.8874	-14.7851	6.48493e-09	2.43703e-06	11.0687
10439780	6430553K19Rik	RIKEN cDNA 6430553K19 gene	NA	0.940465	5.59469	9.61338	6.85722e-07	3.9093e-05	6.40566
10416215	Loxl2	lysyl oxidase-like 2	ENSMUSG00000034205	0.920477	8.62053	12.2452	5.16633e-08	8.13432e-06	9.02303
10450767	H2-M10.1	histocompatibility 2, M region locus 10.1	ENSMUSG00000024448	0.918038	7.34154	5.52473	0.000144933	0.00125593	0.873548
10365833	Usp44	ubiquitin specific peptidase 44	ENSMUSG00000020020	-0.917972	6.8944	-12.9448	2.81539e-08	5.92051e-06	9.6275
10467153	Slc16a12	solute carrier family 16 (monocarboxylic acid transporters), member 12	ENSMUSG00000009378	0.911802	8.52058	15.9779	2.72815e-09	1.43778e-06	11.9027
10501229	Gstm1	glutathione S-transferase, mu 1	ENSMUSG00000058135	-0.911611	8.24929	-13.5132	1.75548e-08	4.79727e-06	10.0946
10455080	Pcdhb9	protocadherin beta 9	ENSMUSG00000051242	0.910784	4.99188	9.62424	6.77673e-07	3.9093e-05	6.41773
10573008	Zfp827	zinc finger protein 827	ENSMUSG00000071064	0.908359	8.03328	15.5754	3.62913e-09	1.70479e-06	11.6293
10569017	Ifitm3	interferon induced transmembrane protein 3	ENSMUSG00000025492	0.90801	7.44804	8.92748	1.47768e-06	6.16229e-05	5.61835
10540333	Cntn6	contactin 6	ENSMUSG00000030092	-0.896517	5.66631	-5.24968	0.000224335	0.00170543	0.42137
10368277	Snora33	small nucleolar RNA, H/ACA box 33	NA	0.895763	9.81706	4.92062	0.000383675	0.00248882	-0.133161
10406823	Gm2373	predicted gene 2373	NA	0.895427	9.44595	15.938	2.80566e-09	1.43778e-06	11.8759
10472916	Cdca7	cell division cycle associated 7	ENSMUSG00000055612	-0.888497	7.91314	-11.1701	1.39602e-07	1.47091e-05	8.02418
10455092	Pcdhb12	protocadherin beta 12	ENSMUSG00000043458	0.885068	7.02349	11.0755	1.52951e-07	1.55205e-05	7.93191
10407286	BC067074	cDNA sequence BC067074	ENSMUSG00000021763	-0.877525	6.01692	-11.7827	7.84825e-08	1.05195e-05	8.60417
10455084	Pcdhb10	protocadherin beta 10	ENSMUSG00000045657	0.877019	6.2394	11.6456	8.90792e-08	1.14123e-05	8.47692
10350630	Fam129a	family with sequence similarity 129, member A	ENSMUSG00000026483	-0.874554	8.66712	-14.7975	6.42439e-09	2.43703e-06	11.0778
10382341	Sstr2	somatostatin receptor 2	ENSMUSG00000047904	-0.874158	8.41668	-16.4809	1.92743e-09	1.27823e-06	12.2335
10484389	Tfpi	tissue factor pathway inhibitor	ENSMUSG00000027082	-0.873885	8.55569	-13.3414	2.0211e-08	4.84806e-06	9.95556
10382136	1810010H24Rik	RIKEN cDNA 1810010H24 gene	NA	0.873485	9.86845	9.12778	1.17546e-06	5.47611e-05	5.85336
10391762	Gjc1	gap junction protein, gamma 1	ENSMUSG00000034520	0.87022	6.8927	10.4946	2.71928e-07	2.15519e-05	7.34874
10429203	Fam135b	family with sequence similarity 135, member B	ENSMUSG00000036800	0.867764	6.63915	9.1517	1.14407e-06	5.44232e-05	5.88114
10604076	Snora69	small nucleolar RNA, H/ACA box 69	NA	0.864201	9.59807	4.88895	0.000404335	0.0025725	-0.187287
10603533	Ssxb3	synovial sarcoma, X member B, breakpoint 3	ENSMUSG00000079701	0.853146	6.90895	11.0017	1.64321e-07	1.58338e-05	7.8594
10583312	Taf1d	TATA box binding protein (Tbp)-associated factor, RNA polymerase I, D	ENSMUSG00000031939	0.851202	10.1029	13.1719	2.32625e-08	5.46379e-06	9.81656
10458314	Tmem173	transmembrane protein 173	ENSMUSG00000024349	0.845488	8.6307	12.8522	3.04585e-08	5.92051e-06	9.54941
10368647	Dse	dermatan sulfate epimerase	ENSMUSG00000039497	0.844499	5.969	8.63683	2.07421e-06	7.56784e-05	5.26953
10409602	Trpc7	transient receptor potential cation channel, subfamily C, member 7	ENSMUSG00000021541	0.841207	8.47771	13.4516	1.84611e-08	4.79727e-06	10.0449
10584236	Pate2	prostate and testis expressed 2	ENSMUSG00000074452	0.839895	6.77945	8.92878	1.47547e-06	6.16229e-05	5.61989
10604982	Pnma5	paraneoplastic antigen family 5	ENSMUSG00000050424	0.837266	8.22611	12.2326	5.2248e-08	8.13432e-06	9.01178
10384504	Meis1	Meis homeobox 1	ENSMUSG00000020160	-0.83042	8.16127	-13.5893	1.65012e-08	4.79727e-06	10.1555
10543031	Slc25a13	solute carrier family 25 (mitochondrial carrier, adenine nucleotide translocator), member 13	ENSMUSG00000015112	-0.827772	6.42415	-13.6097	1.62309e-08	4.79727e-06	10.1718
10455118	Pcdhb18	protocadherin beta 18	ENSMUSG00000048347	0.827365	6.88518	11.8469	7.39942e-08	1.01733e-05	8.66328
10601503	Dach2	dachshund 2 (Drosophila)	ENSMUSG00000025592	-0.825824	5.93686	-6.45212	3.59182e-05	0.000483224	2.31974
10595171	Mb21d1	Mab-21 domain containing 1	ENSMUSG00000032344	0.825119	5.92112	11.3792	1.1435e-07	1.3155e-05	8.2255
10455071	Pcdhb7	protocadherin beta 7	ENSMUSG00000045062	0.819093	7.15483	9.66378	6.49222e-07	3.81215e-05	6.4616
10419147	Gm3676	predicted gene 3676	ENSMUSG00000090505	-0.814162	5.92006	-10.2659	3.43557e-07	2.4675e-05	7.11096
10455108	Pcdhb16	protocadherin beta 16	ENSMUSG00000047910	0.812935	6.88887	11.0821	1.51973e-07	1.55205e-05	7.93839
10411709	Cdk7	cyclin-dependent kinase 7	ENSMUSG00000069089	0.809395	7.3551	13.0706	2.53201e-08	5.71503e-06	9.73266
10485466	Cat	catalase	ENSMUSG00000027187	-0.802806	9.46012	-13.406	1.91648e-08	4.79727e-06	10.008
10607437	Magea3	melanoma antigen, family A, 3	ENSMUSG00000094196	-0.801663	5.39365	-10.9782	1.68138e-07	1.59409e-05	7.83617
10525419	P2rx7	purinergic receptor P2X, ligand-gated ion channel, 7	ENSMUSG00000029468	-0.797478	9.54638	-18.2415	6.14431e-10	4.61806e-07	13.3048
10559297	Slc22a18	solute carrier family 22 (organic cation transporter), member 18	ENSMUSG00000000154	0.796778	8.48766	12.9599	2.7796e-08	5.92051e-06	9.64019
10432540	Lima1	LIM domain and actin binding 1	ENSMUSG00000023022	-0.796497	7.09277	-7.74876	6.17797e-06	0.000153754	4.1433
10545198	Igkv4-59	immunoglobulin kappa variable 4-59	NA	-0.796408	7.12746	-8.68476	1.96025e-06	7.41605e-05	5.3277
10355916	Pax3	paired box 3	ENSMUSG00000004872	-0.795503	6.86553	-9.31924	9.47946e-07	4.73202e-05	6.07403
10601360	Atp7a	ATPase, Cu++ transporting, alpha polypeptide	ENSMUSG00000033792	-0.792242	8.48202	-12.8544	3.04022e-08	5.92051e-06	9.55125
10579049	Gm10033	predicted gene 10033	NA	0.789475	8.92886	13.7239	1.48012e-08	4.76769e-06	10.2625
10456005	Cd74	CD74 antigen (invariant polypeptide of major histocompatibility complex, class II antigen-associated)	ENSMUSG00000024610	0.78822	8.93521	10.6789	2.25931e-07	1.94793e-05	7.53686
10381934	Tanc2	tetratricopeptide repeat, ankyrin repeat and coiled-coil containing 2	ENSMUSG00000053580	-0.778141	9.32658	-15.4233	4.04951e-09	1.75593e-06	11.5239
10354374	Slc40a1	solute carrier family 40 (iron-regulated transporter), member 1	ENSMUSG00000025993	0.773767	6.44811	7.99555	4.52212e-06	0.000125264	4.46574
10500808	Olfml3	olfactomedin-like 3	ENSMUSG00000027848	-0.772991	9.03905	-9.19077	1.09472e-06	5.25186e-05	5.92639
10607450	Magea5	melanoma antigen, family A, 5	ENSMUSG00000079349	-0.770136	7.35672	-4.91055	0.000390122	0.00251225	-0.15036
10401028	Sgpp1	sphingosine-1-phosphate phosphatase 1	ENSMUSG00000021054	0.770112	11.3644	15.4957	3.84322e-09	1.73314e-06	11.5742
10369792	Arid5b	AT rich interactive domain 5B (MRF1-like)	ENSMUSG00000019947	-0.757272	7.85756	-9.17915	1.10916e-06	5.29857e-05	5.91295
10521907	Smim20	small integral membrane protein 20	ENSMUSG00000061461	-0.757072	8.84966	-13.0694	2.53461e-08	5.71503e-06	9.73164
10598493	Pcsk1n	proprotein convertase subtilisin/kexin type 1 inhibitor	ENSMUSG00000039278	-0.757066	9.7951	-13.5541	1.69796e-08	4.79727e-06	10.1274
10363921	Pcdh15	protocadherin 15	ENSMUSG00000052613	-0.753865	6.38603	-7.08834	1.47498e-05	0.00026105	3.24245
10522895	Csn3	casein kappa	ENSMUSG00000001622	-0.751454	6.09687	-6.13674	5.69582e-05	0.000666053	1.84157
10347910	Fbxo36	F-box protein 36	ENSMUSG00000073633	-0.75099	8.85255	-12.1175	5.79065e-08	8.42064e-06	8.90894
10585703	Rpp25	ribonuclease P/MRP 25 subunit	ENSMUSG00000062309	-0.74756	9.22155	-14.3222	9.23184e-09	3.15393e-06	10.725
10382844	Snord1c	small nucleolar RNA, C/D box 1C	ENSMUSG00000065640	0.746283	6.71549	4.45921	0.000834903	0.00433501	-0.933986
10463836	Gsto1	glutathione S-transferase omega 1	ENSMUSG00000025068	-0.743774	6.61475	-10.2697	3.42219e-07	2.4675e-05	7.11494
10392135	Gh	growth hormone	ENSMUSG00000020713	0.742861	8.91365	12.8724	2.99404e-08	5.92051e-06	9.56645
10514275	Ptplad2	protein tyrosine phosphatase-like A domain containing 2	ENSMUSG00000028497	-0.742056	6.74025	-11.0793	1.52392e-07	1.55205e-05	7.93561
10379996	Mir301	microRNA 301	NA	0.741589	5.2117	6.60953	2.86778e-05	0.000413998	2.5532
10606495	Pof1b	premature ovarian failure 1B	ENSMUSG00000034607	0.739844	4.41676	9.33365	9.3286e-07	4.73202e-05	6.09048
10360684	Ephx1	epoxide hydrolase 1, microsomal	ENSMUSG00000038776	-0.73888	10.0011	-12.0027	6.42194e-08	9.05011e-06	8.80534
10350247	Kif21b	kinesin family member 21B	ENSMUSG00000041642	-0.738362	6.77572	-16.0323	2.6263e-09	1.43778e-06	11.939
10424349	Sqle	squalene epoxidase	ENSMUSG00000022351	-0.735457	10.8705	-16.2852	2.20383e-09	1.35172e-06	12.1061
10355500	Igfbp5	insulin-like growth factor binding protein 5	ENSMUSG00000026185	-0.730926	7.01515	-5.44382	0.000164625	0.0013587	0.741625
10455098	Pcdhb14	protocadherin beta 14	ENSMUSG00000044043	0.73065	6.61621	8.26349	3.24768e-06	0.000102849	4.80746
10562657	Gm5595	predicted gene 5595	ENSMUSG00000069727	0.728463	4.33066	3.97291	0.00195094	0.00831879	-1.8031
10497752	Carhsp1	calcium regulated heat stable protein 1	ENSMUSG00000008393	-0.725311	9.51544	-9.23989	1.03591e-06	5.01238e-05	5.98304
10355806	Tuba4a	tubulin, alpha 4A	ENSMUSG00000026202	-0.723885	7.37241	-5.60482	0.000127876	0.001146	1.00324
10394353	0610009D07Rik	RIKEN cDNA 0610009D07 gene	ENSMUSG00000037361	-0.72351	8.4598	-9.1073	1.20306e-06	5.55875e-05	5.82954
10414659	Snord58b	small nucleolar RNA, C/D box 58B	ENSMUSG00000064871	0.723004	5.57603	3.64897	0.00348323	0.0129988	-2.39239
10501222	Gstm2	glutathione S-transferase, mu 2	ENSMUSG00000040562	-0.719703	8.67439	-7.74665	6.19465e-06	0.000153829	4.14051
10604743	Snord61	small nucleolar RNA, C/D box 61	NA	0.719128	5.55861	6.33741	4.24102e-05	0.000542642	2.14743
10510215	Gm13139	predicted gene 13139	ENSMUSG00000067916	-0.714718	5.75644	-5.23053	0.000231356	0.00173656	0.389496
10383717	Inpp5j	inositol polyphosphate 5-phosphatase J	ENSMUSG00000034570	-0.711707	7.92998	-11.8183	7.59569e-08	1.03173e-05	8.637
10452613	Arhgap28	Rho GTPase activating protein 28	ENSMUSG00000024043	0.71134	6.3379	9.718	6.12274e-07	3.69133e-05	6.52151
10490289	LOC628147	zinc finger protein 709-like	NA	0.710005	5.07399	3.56498	0.00405436	0.0146597	-2.54602
10510399	Masp2	mannan-binding lectin serine peptidase 2	ENSMUSG00000028979	0.709233	8.79915	7.97488	4.64062e-06	0.000127606	4.43902
10362511	Gstm3	glutathione S-transferase, mu 3	ENSMUSG00000004038	-0.706814	7.08586	-11.5036	1.01697e-07	1.24112e-05	8.34364
10373340	Rbms2	RNA binding motif, single stranded interacting protein 2	ENSMUSG00000040043	0.702445	7.91976	13.4104	1.90955e-08	4.79727e-06	10.0116
10545771	Cyp26b1	cytochrome P450, family 26, subfamily b, polypeptide 1	ENSMUSG00000063415	-0.702416	7.85449	-7.03427	1.58766e-05	0.000273271	3.16617
10412909	Fdft1	farnesyl diphosphate farnesyl transferase 1	ENSMUSG00000021273	-0.702279	10.8038	-8.84655	1.62263e-06	6.51015e-05	5.52216
10366346	Phlda1	pleckstrin homology-like domain, family A, member 1	ENSMUSG00000020205	-0.701643	7.67408	-9.66797	6.46277e-07	3.81215e-05	6.46625
10495120	Ovgp1	oviductal glycoprotein 1	ENSMUSG00000074340	0.701581	8.22151	8.04474	4.25291e-06	0.000121079	4.52913
10448182	Eef1a1	eukaryotic translation elongation factor 1 alpha 1	ENSMUSG00000037742	0.701056	11.1191	6.05731	6.4109e-05	0.000723488	1.71893
10575750	Bcmo1	beta-carotene 15,15'-monooxygenase	ENSMUSG00000031845	-0.70066	7.1775	-12.8691	3.00248e-08	5.92051e-06	9.56365
10574427	Impdh2	inosine 5'-phosphate dehydrogenase 2	ENSMUSG00000062867	0.700229	6.9281	3.15365	0.0085837	0.0266665	-3.29959
10372293	Otogl	otogelin-like	ENSMUSG00000091455	-0.696238	6.4033	-9.65329	6.56637e-07	3.83571e-05	6.44999
10476104	Nop56	NOP56 ribonucleoprotein	ENSMUSG00000027405	0.693207	7.98083	3.1852	0.00810152	0.0254845	-3.24187
10539295	Dqx1	DEAQ RNA-dependent ATPase	ENSMUSG00000009145	0.687332	7.4705	11.0732	1.53298e-07	1.55205e-05	7.92961
10467979	Scd1	stearoyl-Coenzyme A desaturase 1	ENSMUSG00000037071	-0.686702	5.94397	-5.64131	0.000120821	0.00111559	1.06203
10357736	Nfasc	neurofascin	ENSMUSG00000026442	-0.686392	6.96325	-6.97904	1.71229e-05	0.000289855	3.08785
10518835	Camta1	calmodulin binding transcription activator 1	ENSMUSG00000014592	0.685183	7.00345	8.63773	2.07201e-06	7.56784e-05	5.27062
10391286	Stat5b	signal transducer and activator of transcription 5B	ENSMUSG00000020919	-0.684635	7.37028	-9.08476	1.23427e-06	5.60993e-05	5.80325
10455078	Pcdhb8	protocadherin beta 8	ENSMUSG00000045876	0.684307	7.9476	10.9015	1.81246e-07	1.66481e-05	7.76019
10453544	Mettl4	methyltransferase like 4	ENSMUSG00000055660	0.681691	7.62644	7.81432	5.6827e-06	0.000145938	4.22969
10578690	Neil3	nei like 3 (E. coli)	ENSMUSG00000039396	0.67487	9.08037	11.2786	1.25831e-07	1.3908e-05	8.12902
10346564	Casp8	caspase 8	ENSMUSG00000026029	0.671538	8.12491	8.23007	3.38314e-06	0.000105363	4.7653
10522288	Shisa3	shisa homolog 3 (Xenopus laevis)	ENSMUSG00000050010	-0.670754	7.03107	-12.3916	4.53909e-08	7.63787e-06	9.15229
10423825	Fzd6	frizzled homolog 6 (Drosophila)	ENSMUSG00000022297	-0.670452	8.8541	-9.09197	1.22419e-06	5.60993e-05	5.81167
10398362	AF357355	snoRNA AF357355	ENSMUSG00000064621	-0.670271	7.6067	-9.77929	5.73216e-07	3.59945e-05	6.58888
10524417	Iscu	IscU iron-sulfur cluster scaffold homolog (E. coli)	ENSMUSG00000025825	-0.669198	9.52271	-7.80299	5.76517e-06	0.000146968	4.21479
10375956	Fstl4	follistatin-like 4	ENSMUSG00000036264	-0.666466	8.31963	-9.27438	9.96644e-07	4.84318e-05	6.02267
10523161	Mthfd2l	methylenetetrahydrofolate dehydrogenase (NADP+ dependent) 2-like	ENSMUSG00000029376	0.66516	7.79249	11.3376	1.18956e-07	1.34111e-05	8.18568
10586967	Gm7265	predicted gene 7265	NA	0.663307	8.13206	13.0255	2.62991e-08	5.81364e-06	9.69507
10373756	Pla2g3	phospholipase A2, group III	ENSMUSG00000034579	-0.662643	7.53406	-9.32949	9.37189e-07	4.73202e-05	6.08573
10493203	0610031J06Rik	RIKEN cDNA 0610031J06 gene	ENSMUSG00000001418	-0.662264	9.59215	-12.0966	5.90057e-08	8.42064e-06	8.89012
10361358	Rgs17	regulator of G-protein signaling 17	ENSMUSG00000019775	0.660192	7.7125	10.665	2.29088e-07	1.94793e-05	7.52279
10408870	Tbc1d7	TBC1 domain family, member 7	ENSMUSG00000021368	-0.659665	6.77026	-7.36252	1.02118e-05	0.000210087	3.6233
10508651	Sdc3	syndecan 3	ENSMUSG00000025743	-0.659415	8.43692	-11.679	8.63644e-08	1.11916e-05	8.50803
10377429	Snord118	small nucleolar RNA, C/D box 118	ENSMUSG00000064899	0.656996	9.45601	2.97718	0.0118656	0.0344774	-3.6215
10434664	Ndufa11	NADH dehydrogenase (ubiquinone) 1 alpha subcomplex 11	ENSMUSG00000002379	-0.655721	9.98455	-10.5672	2.52714e-07	2.09493e-05	7.42317
10430825	Cenpm	centromere protein M	ENSMUSG00000068101	-0.652728	9.25844	-14.4831	8.15565e-09	2.93505e-06	10.8458
10417579	4930452B06Rik	RIKEN cDNA 4930452B06 gene	ENSMUSG00000021747	-0.651681	6.28841	-12.4297	4.38944e-08	7.63787e-06	9.18573
10465220	Sssca1	Sjogren's syndrome/scleroderma autoantigen 1 homolog (human)	ENSMUSG00000079478	-0.651558	10.3294	-14.4554	8.33082e-09	2.93505e-06	10.8251
10455094	Pcdhb13	protocadherin beta 13	ENSMUSG00000047307	0.650873	6.82673	5.7252	0.000106119	0.00102168	1.19647
10588755	Camkv	CaM kinase-like vesicle-associated	ENSMUSG00000032936	-0.650525	7.37068	-11.4851	1.03482e-07	1.24112e-05	8.32612
10381361	Aoc2	amine oxidase, copper containing 2 (retina-specific)	ENSMUSG00000078651	0.647729	8.94365	9.75863	5.86073e-07	3.63043e-05	6.56621
10376887	Snord49a	small nucleolar RNA, C/D box 49A	ENSMUSG00000065734	0.647171	9.26441	8.21097	3.46326e-06	0.00010668	4.74115
10524588	Ankrd13a	ankyrin repeat domain 13a	ENSMUSG00000041870	-0.6467	9.30703	-10.8482	1.90987e-07	1.72255e-05	7.70718
10556082	Ppfibp2	PTPRF interacting protein, binding protein 2 (liprin beta 2)	ENSMUSG00000036528	0.645195	10.4935	12.0969	5.8987e-08	8.42064e-06	8.89044
10532819	Kctd10	potassium channel tetramerisation domain containing 10	ENSMUSG00000001098	-0.643657	8.11314	-9.71865	6.11846e-07	3.69133e-05	6.52223
10455061	Pcdhb4	protocadherin beta 4	ENSMUSG00000045689	0.64317	7.42358	9.51445	7.63953e-07	4.25068e-05	6.2951
10563077	Rcn3	reticulocalbin 3, EF-hand calcium binding domain	ENSMUSG00000019539	0.640801	10.4157	7.87035	5.29305e-06	0.0001391	4.30311
10585803	Stra6	stimulated by retinoic acid gene 6	ENSMUSG00000032327	0.640477	9.9534	9.35863	9.07301e-07	4.62847e-05	6.11895
10376208	Gm2a	GM2 ganglioside activator protein	ENSMUSG00000000594	-0.64006	9.0752	-10.9209	1.77812e-07	1.66481e-05	7.77956
10385555	1700024J04Rik	RIKEN cDNA 1700024J04 gene	NA	0.638049	8.45251	12.7639	3.28475e-08	6.21892e-06	9.4744
10433055	Mir688	microRNA 688	ENSMUSG00000076009	-0.636283	7.79885	-7.90861	5.04351e-06	0.000135061	4.35301
10434698	Fetub	fetuin beta	ENSMUSG00000022871	-0.632313	9.80077	-8.91154	1.5051e-06	6.21555e-05	5.59946
10455088	Pcdhb11	protocadherin beta 11	ENSMUSG00000051486	0.630949	7.32853	8.29654	3.11943e-06	9.94109e-05	4.84902
10515253	Uqcrh	ubiquinol-cytochrome c reductase hinge protein	ENSMUSG00000063882	-0.627861	9.86363	-5.50821	0.000148741	0.00127619	0.846684
10358982	Mr1	major histocompatibility complex, class I-related	ENSMUSG00000026471	0.626116	7.56131	7.70969	6.49498e-06	0.000158328	4.09155
10431170	5031439G07Rik	RIKEN cDNA 5031439G07 gene	ENSMUSG00000036046	-0.625829	10.017	-14.8464	6.19328e-09	2.43703e-06	11.1134
10455123	Pcdhb19	protocadherin beta 19	ENSMUSG00000043313	0.6242	6.5917	7.59598	7.5207e-06	0.000170302	3.93989
10461162	Snord22	small nucleolar RNA, C/D box 22	ENSMUSG00000065087	0.62335	8.78549	5.26394	0.000219254	0.00167698	0.445069
10467139	Lipa	lysosomal acid lipase A	ENSMUSG00000024781	-0.62238	5.97214	-7.95939	4.73158e-06	0.000129475	4.41897
10405911	Zfp759	zinc finger protein 759	ENSMUSG00000057396	0.619075	7.49063	8.29754	3.11565e-06	9.94109e-05	4.85027
10361091	Atf3	activating transcription factor 3	ENSMUSG00000026628	-0.618456	9.29086	-10.4045	2.98034e-07	2.27116e-05	7.25557
10436600	Mir99a	microRNA 99a	ENSMUSG00000065530	-0.616761	6.0175	-8.50886	2.41479e-06	8.34408e-05	5.11296
10407598	Ryr2	ryanodine receptor 2, cardiac	ENSMUSG00000021313	-0.615292	7.42863	-12.2532	5.12979e-08	8.13432e-06	9.03012
10388430	Serpinf1	serine (or cysteine) peptidase inhibitor, clade F, member 1	ENSMUSG00000000753	-0.613673	8.83598	-9.80789	5.55913e-07	3.54088e-05	6.62019
10367497	Olfr787	olfactory receptor 787	ENSMUSG00000096497	-0.613662	3.11322	-4.60014	0.00065643	0.00363308	-0.686673
10501754	D3Bwg0562e	DNA segment, Chr 3, Brigham & Women's Genetics 0562 expressed	ENSMUSG00000044667	-0.611634	6.77255	-7.05299	1.54762e-05	0.000268017	3.19263
10521471	Ppp2r2c	protein phosphatase 2, regulatory subunit B, gamma	ENSMUSG00000029120	-0.610717	8.88657	-9.37634	8.89641e-07	4.57982e-05	6.13909
10365204	Gm10777	predicted gene 10777	NA	0.610444	6.60339	5.78294	9.71097e-05	0.000967151	1.28842
10486102	Gpr176	G protein-coupled receptor 176	ENSMUSG00000040133	-0.609836	6.67211	-9.35941	9.06515e-07	4.62847e-05	6.11984
10410295	Zfp595	zinc finger protein 595	ENSMUSG00000057842	0.609808	6.65589	10.7236	2.16068e-07	1.93329e-05	7.58214
10473503	Olfr1052	olfactory receptor 1052	ENSMUSG00000047149	-0.609381	5.51368	-6.4806	3.44759e-05	0.000469375	2.36225
10432178	Snora2b	small nucleolar RNA, H/ACA box 2B	NA	0.608004	7.93956	5.62525	0.000123874	0.00112626	1.03617
10450363	Snord52	small nucleolar RNA, C/D box 52	ENSMUSG00000093009	0.605699	7.9761	7.05656	1.54013e-05	0.000267954	3.19766
10406466	Tmem161b	transmembrane protein 161B	ENSMUSG00000035762	0.605546	10.6254	13.45	1.84858e-08	4.79727e-06	10.0436
10563099	Snord35b	small nucleolar RNA, C/D box 35B	NA	0.604228	9.73032	3.30735	0.00647894	0.0213079	-3.01813
10561690	Catsperg1	catsper channel auxiliary subunit gamma 1	ENSMUSG00000049676	0.602413	8.27142	5.10285	0.000284499	0.00200968	0.175722
10563108	Snord35a	small nucleolar RNA, C/D box 35A	NA	0.602401	10.5371	4.61989	0.000634808	0.00355001	-0.6522
10524308	Mir701	microRNA 701	NA	0.602329	5.93902	4.6319	0.000622027	0.00349413	-0.631262
10600741	Gm5941	predicted gene 5941	ENSMUSG00000071726	-0.601141	5.18606	-4.63588	0.00061785	0.00347648	-0.624326
10586168	Snord16a	small nucleolar RNA, C/D box 16A	NA	0.600794	11.636	11.9666	6.6351e-08	9.23508e-06	8.77261
10560816	Atp5g2	ATP synthase, H+ transporting, mitochondrial F0 complex, subunit C2 (subunit 9)	c("ENSMUSG00000066724", "ENSMUSG00000062683")	-0.600281	12.0926	-11.0179	1.61751e-07	1.57637e-05	7.87534
10586454	D030028M11Rik	RIKEN cDNA D030028M11 gene	NA	0.597642	7.29725	8.20108	3.50555e-06	0.000107514	4.72863
10607156	Dcx	doublecortin	ENSMUSG00000031285	-0.597137	5.47777	-5.58312	0.000132276	0.00117239	0.968191
10508721	Snora44	small nucleolar RNA, H/ACA box 44	ENSMUSG00000064604	0.596797	10.4174	2.94075	0.0126863	0.0362865	-3.6877
10601447	Fam46d	family with sequence similarity 46, member D	ENSMUSG00000073007	0.594587	6.25206	5.27956	0.000213828	0.00164001	0.470991
10467013	Prkg1	protein kinase, cGMP-dependent, type I	ENSMUSG00000052920	-0.59437	7.4843	-8.61663	2.12433e-06	7.65734e-05	5.24495
10536563	Cftr	cystic fibrosis transmembrane conductance regulator	ENSMUSG00000041301	0.59411	8.61842	9.91602	4.9541e-07	3.20992e-05	6.73786
10401673	Tgfb3	transforming growth factor, beta 3	ENSMUSG00000021253	-0.593729	7.29369	-9.07526	1.24768e-06	5.60993e-05	5.79216
10352448	Dusp10	dual specificity phosphatase 10	ENSMUSG00000039384	-0.592808	8.89733	-12.4034	4.492e-08	7.63787e-06	9.16269
10513776	Astn2	astrotactin 2	ENSMUSG00000028373	0.592637	8.33652	8.97904	1.39263e-06	6.03867e-05	5.67926
10391100	Atp5g1	ATP synthase, H+ transporting, mitochondrial F0 complex, subunit C1 (subunit 9)	ENSMUSG00000006057	-0.591878	11.7839	-8.62519	2.10293e-06	7.62331e-05	5.25537
10500276	BC028528	cDNA sequence BC028528	ENSMUSG00000038543	0.590557	7.23399	5.14774	0.000264484	0.0019114	0.251123
10600082	Nsdhl	NAD(P) dependent steroid dehydrogenase-like	ENSMUSG00000031349	-0.586576	9.6191	-8.06513	4.14645e-06	0.000119864	4.55531
10497077	Mir186	microRNA 186	NA	0.585215	6.68682	6.7754	2.27016e-05	0.000353018	2.79551
10572271	Tm6sf2	transmembrane 6 superfamily member 2	ENSMUSG00000036151	0.584478	7.73326	6.39262	3.91419e-05	0.000509568	2.2306
10397482	Tmem63c	transmembrane protein 63c	ENSMUSG00000034145	0.581712	9.30126	10.1319	3.94775e-07	2.74734e-05	6.96944
10437023	Morc3	microrchidia 3	ENSMUSG00000039456	0.581511	10.1103	12.1736	5.50703e-08	8.27817e-06	8.95918
10608719	Plekhn1	pleckstrin homology domain containing, family N member 1	ENSMUSG00000078485	0.580038	7.32645	11.5793	9.47465e-08	1.18686e-05	8.41488
10514128	Ttc39b	tetratricopeptide repeat domain 39B	ENSMUSG00000038172	0.579994	9.69855	9.40668	8.60236e-07	4.46891e-05	6.17353
10394674	Socs2	suppressor of cytokine signaling 2	ENSMUSG00000020027	0.579528	9.79717	11.2581	1.28314e-07	1.40155e-05	8.1093
10480090	Itga8	integrin alpha 8	ENSMUSG00000026768	-0.57923	6.6167	-7.70438	6.53934e-06	0.000158731	4.08451
10347734	Sgpp2	sphingosine-1-phosphate phosphotase 2	ENSMUSG00000032908	-0.578536	9.0791	-12.3076	4.88817e-08	8.1043e-06	9.07832
10569786	Pnpla6	patatin-like phospholipase domain containing 6	ENSMUSG00000004565	0.576871	9.56589	10.6619	2.29799e-07	1.94793e-05	7.51964
10408359	Nrsn1	neurensin 1	ENSMUSG00000048978	-0.575574	9.41358	-8.71042	1.902e-06	7.31366e-05	5.35874
10482336	Lrp1b	low density lipoprotein-related protein 1B (deleted in tumors)	ENSMUSG00000049252	0.575055	6.43039	11.7478	8.10451e-08	1.06244e-05	8.5719
10359713	Sft2d2	SFT2 domain containing 2	ENSMUSG00000040848	0.573952	8.6241	7.28462	1.13256e-05	0.000222126	3.5161
10477644	Trp53inp2	transformation related protein 53 inducible nuclear protein 2	ENSMUSG00000038375	-0.573828	10.1005	-12.7327	3.37387e-08	6.21892e-06	9.44779
10404376	Agtr1a	angiotensin II receptor, type 1a	ENSMUSG00000049115	-0.573231	7.7451	-9.61518	6.84376e-07	3.9093e-05	6.40767
10577792	Plekha2	pleckstrin homology domain-containing, family A (phosphoinositide binding specific) member 2	ENSMUSG00000031557	0.57293	8.52964	8.49038	2.46874e-06	8.45247e-05	5.09019
10584309	Msantd2	Myb/SANT-like DNA-binding domain containing 2	ENSMUSG00000042138	0.572817	8.4816	12.7361	3.36396e-08	6.21892e-06	9.45071
10371107	Mrpl54	mitochondrial ribosomal protein L54	ENSMUSG00000034932	-0.571994	9.16424	-7.55224	7.96035e-06	0.000177713	3.8811
10540248	Mitf	microphthalmia-associated transcription factor	ENSMUSG00000035158	-0.570548	7.43457	-8.97249	1.40314e-06	6.04448e-05	5.67154
10594426	Zwilch	zwilch kinetochore protein	ENSMUSG00000032400	0.569611	8.80774	8.23865	3.3478e-06	0.000105315	4.77614
10422518	Tmtc4	transmembrane and tetratricopeptide repeat containing 4	ENSMUSG00000041594	-0.569454	9.57167	-9.7326	6.02717e-07	3.67712e-05	6.53759
10401667	0610007P14Rik	RIKEN cDNA 0610007P14 gene	ENSMUSG00000021252	-0.569035	10.3107	-8.08957	4.02257e-06	0.000117185	4.58663
10411728	Cenph	centromere protein H	ENSMUSG00000045273	0.568833	8.70115	8.94803	1.44313e-06	6.11648e-05	5.64267
10369688	Tet1	tet methylcytosine dioxygenase 1	ENSMUSG00000047146	-0.56676	5.95865	-7.63191	7.17907e-06	0.000166537	3.98798
10451721	Dazl	deleted in azoospermia-like	ENSMUSG00000010592	0.565356	6.59897	9.06375	1.26412e-06	5.63307e-05	5.77871
10457862	Rprd1a	regulation of nuclear pre-mRNA domain containing 1A	ENSMUSG00000040446	0.565246	8.9523	9.561	7.26007e-07	4.07214e-05	6.34724
10520388	Rbm33	RNA binding motif protein 33	ENSMUSG00000048271	0.565116	8.3742	9.012	1.34104e-06	5.90579e-05	5.71805
10344679	St18	suppression of tumorigenicity 18	ENSMUSG00000033740	-0.564503	8.07722	-8.92372	1.4841e-06	6.16229e-05	5.6139
10347650	Asic4	acid-sensing (proton-gated) ion channel family member 4	ENSMUSG00000033007	-0.564321	8.97441	-10.8625	1.88321e-07	1.71221e-05	7.72142
10431140	1810041L15Rik	RIKEN cDNA 1810041L15 gene	ENSMUSG00000062760	-0.563928	8.94851	-10.1429	3.90273e-07	2.73288e-05	6.98112
10483299	Scn1a	sodium channel, voltage-gated, type I, alpha	ENSMUSG00000064329	-0.56289	6.6049	-6.32325	4.3294e-05	0.00054904	2.12604
10407370	4833420G17Rik	RIKEN cDNA 4833420G17 gene	ENSMUSG00000062822	0.562758	10.2759	11.7713	7.93116e-08	1.05195e-05	8.59362
10604347	Smarca1	SWI/SNF related, matrix associated, actin dependent regulator of chromatin, subfamily a, member 1	ENSMUSG00000031099	0.561715	5.53746	6.32396	4.32496e-05	0.00054904	2.12711
10402648	Mpc1	mitochondrial pyruvate carrier 1	ENSMUSG00000023861	-0.560713	9.75126	-9.42295	8.449e-07	4.43042e-05	6.19196
10475946	Zc3h6	zinc finger CCCH type containing 6	ENSMUSG00000042851	0.560157	7.66161	9.13622	1.16428e-06	5.46919e-05	5.86318
10526792	Lamtor4	late endosomal/lysosomal adaptor, MAPK and MTOR activator 4	ENSMUSG00000050552	-0.559991	9.63517	-7.25431	1.17935e-05	0.000225738	3.47418
10531560	Antxr2	anthrax toxin receptor 2	ENSMUSG00000029338	-0.558184	8.45468	-8.1375	3.79094e-06	0.000112768	4.64785
10349932	Etnk2	ethanolamine kinase 2	ENSMUSG00000070644	-0.557266	5.86492	-6.04268	6.55276e-05	0.000735082	1.69623
10501374	5330417C22Rik	RIKEN cDNA 5330417C22 gene	ENSMUSG00000040412	-0.555611	7.78714	-9.45985	8.11196e-07	4.33432e-05	6.23366
10463016	Cyp2c65	cytochrome P450, family 2, subfamily c, polypeptide 65	ENSMUSG00000067231	0.552472	4.84616	3.1389	0.00881908	0.0272924	-3.32657
10527920	Cyp51	cytochrome P450, family 51	ENSMUSG00000001467	-0.550876	10.0383	-6.19299	5.24101e-05	0.000631273	1.92787
10462922	Plce1	phospholipase C, epsilon 1	ENSMUSG00000024998	0.549813	8.25727	9.05347	1.27902e-06	5.67703e-05	5.76668
10432492	Faim2	Fas apoptotic inhibitory molecule 2	ENSMUSG00000023011	-0.548894	9.70198	-6.97057	1.7323e-05	0.000292364	3.07581
10549276	Bhlhe41	basic helix-loop-helix family, member e41	ENSMUSG00000030256	-0.548527	5.99419	-6.107	5.9531e-05	0.000682065	1.79575
10595614	Snhg5	small nucleolar RNA host gene 5	ENSMUSG00000097195	0.546648	10.0584	8.73779	1.84195e-06	7.16074e-05	5.39176
10348653	Gpc1	glypican 1	ENSMUSG00000034220	-0.545628	8.4366	-9.07434	1.24897e-06	5.60993e-05	5.79109
10484844	Olfr1251	olfactory receptor 1251	ENSMUSG00000075077	0.544573	2.9726	2.26262	0.0435918	0.0982628	-4.88512
10486262	Ltk	leukocyte tyrosine kinase	ENSMUSG00000027297	0.544503	8.69972	8.11978	3.87488e-06	0.000114962	4.62525
10452047	Ptprs	protein tyrosine phosphatase, receptor type, S	ENSMUSG00000013236	-0.544453	9.39827	-14.1212	1.07971e-08	3.58021e-06	10.5719
10550059	2310014L17Rik	RIKEN cDNA 2310014L17 gene	ENSMUSG00000033967	0.544344	7.6326	7.75088	6.16123e-06	0.000153754	4.1461
10362097	H60b	histocompatibility 60b	ENSMUSG00000075297	-0.54385	6.21043	-7.3569	1.0288e-05	0.000210253	3.6156
10411464	Fcho2	FCH domain only 2	ENSMUSG00000041685	0.543825	10.2299	10.6701	2.27914e-07	1.94793e-05	7.528
10526502	Rabl5	RAB, member of RAS oncogene family-like 5	ENSMUSG00000007987	-0.54325	8.69087	-10.547	2.5791e-07	2.1224e-05	7.4025
10527148	Slc29a4	solute carrier family 29 (nucleoside transporters), member 4	ENSMUSG00000050822	-0.543078	9.59124	-11.4281	1.09192e-07	1.29486e-05	8.27202
10405918	Rsl1	regulator of sex limited protein 1	ENSMUSG00000058900	0.54299	8.94579	8.66802	1.99926e-06	7.49126e-05	5.30742
10577152	E330037G11Rik	RIKEN cDNA E330037G11 gene	NA	0.542566	6.07772	7.23281	1.21378e-05	0.000229986	3.44436
10592856	Ccdc84	coiled-coil domain containing 84	ENSMUSG00000043923	0.542299	9.53394	9.61224	6.86572e-07	3.9093e-05	6.40439
10469237	Mir466	microRNA 466	NA	0.541532	3.47275	7.72321	6.38329e-06	0.000157129	4.10949
10495416	Vav3	vav 3 oncogene	ENSMUSG00000033721	-0.540821	6.64516	-9.97819	4.63865e-07	3.10659e-05	6.805
10488617	Nrsn2	neurensin 2	ENSMUSG00000059361	-0.540186	8.58125	-9.94304	4.81425e-07	3.15557e-05	6.76708
10454731	Cdc23	CDC23 cell division cycle 23	ENSMUSG00000024370	0.539641	8.78276	2.35578	0.0368787	0.08562	-4.72617
10581473	Slc7a6os	solute carrier family 7, member 6 opposite strand	ENSMUSG00000033106	0.538367	9.3558	9.47975	7.93617e-07	4.30156e-05	6.25609
10435075	Tfrc	transferrin receptor	ENSMUSG00000022797	-0.537203	10.2023	-6.00048	6.98075e-05	0.000768564	1.63063
10346843	Nrp2	neuropilin 2	ENSMUSG00000025969	-0.53695	9.3076	-9.85785	5.27023e-07	3.39523e-05	6.6747
10498273	Tm4sf1	transmembrane 4 superfamily member 1	ENSMUSG00000027800	-0.536847	6.10981	-7.29905	1.11098e-05	0.000220515	3.53602
10551626	Lgals4	lectin, galactose binding, soluble 4	ENSMUSG00000053964	0.536444	7.30202	11.5993	9.29961e-08	1.17802e-05	8.43364
10410187	Nlrp4f	NLR family, pyrin domain containing 4F	ENSMUSG00000032999	0.536165	5.80336	8.04486	4.25232e-06	0.000121079	4.52928
10449315	Uqcc2	ubiquinol-cytochrome c reductase complex assembly factor 2	ENSMUSG00000024208	-0.535883	10.1079	-10.4333	2.89399e-07	2.23472e-05	7.28546
10390117	Itga3	integrin alpha 3	ENSMUSG00000001507	-0.535118	6.96792	-7.07913	1.49355e-05	0.000262492	3.22949
10515832	Olfr1329	olfactory receptor 1329	ENSMUSG00000096705	0.53336	6.68418	5.20351	0.000241661	0.00179007	0.34443
10385495	Cdk2ap1	CDK2 (cyclin-dependent kinase 2)-associated protein 1	c("ENSMUSG00000029394", "ENSMUSG00000078154")	-0.533177	10.3732	-7.66718	6.85972e-06	0.000161454	4.03505
10579550	Unc13a	unc-13 homolog A (C. elegans)	ENSMUSG00000034799	0.533161	9.02024	8.40837	2.72427e-06	9.08682e-05	4.98868
10590494	Kif15	kinesin family member 15	ENSMUSG00000036768	0.532837	8.93347	7.27895	1.14116e-05	0.000222585	3.50827
10542885	2810474O19Rik	RIKEN cDNA 2810474O19 gene	ENSMUSG00000032712	-0.532413	8.76097	-6.78836	2.22943e-05	0.000349091	2.81428
10434741	Eif4a2	eukaryotic translation initiation factor 4A2	ENSMUSG00000022884	0.532345	7.59309	4.05154	0.00169759	0.00752306	-1.66111
10509113	Srsf10	serine/arginine-rich splicing factor 10	ENSMUSG00000028676	0.531312	9.37588	10.5357	2.60862e-07	2.13113e-05	7.39094
10560298	Slc1a5	solute carrier family 1 (neutral amino acid transporter), member 5	ENSMUSG00000001918	-0.530633	8.05842	-6.89759	1.91553e-05	0.000314806	2.97159
10355474	2004-03-01	membrane-associated ring finger (C3HC4) 4	ENSMUSG00000039372	-0.529555	8.57081	-10.0995	4.08372e-07	2.80731e-05	6.93492
10451879	Zfp119a	zinc finger protein 119a	ENSMUSG00000057835	0.529373	6.46428	5.73807	0.000104037	0.00100507	1.21701
10548030	Cd9	CD9 antigen	ENSMUSG00000030342	-0.52905	10.2449	-8.61063	2.13949e-06	7.65734e-05	5.23763
10383799	Tcn2	transcobalamin 2	ENSMUSG00000020432	-0.528527	8.4096	-8.13907	3.78361e-06	0.000112768	4.64985
10403413	Idi1	isopentenyl-diphosphate delta isomerase	ENSMUSG00000058258	-0.52814	9.24771	-4.66749	0.000585698	0.00334337	-0.569299
10351039	Gas5	growth arrest specific 5	ENSMUSG00000053332	0.527927	7.86211	4.81051	0.000460689	0.00281966	-0.321884
10604106	Gm9	predicted gene 9	ENSMUSG00000073243	0.527645	6.63094	7.70882	6.5022e-06	0.000158328	4.09041
10410709	Rfesd	Rieske (Fe-S) domain containing	ENSMUSG00000043190	0.526989	9.10201	10.9774	1.68261e-07	1.59409e-05	7.83543
10574899	Nutf2	nuclear transport factor 2	c("ENSMUSG00000008450", "ENSMUSG00000071497")	0.526338	10.0134	8.89228	1.53893e-06	6.26351e-05	5.57661
10411595	Naip2	NLR family, apoptosis inhibitory protein 2	ENSMUSG00000078945	0.526212	9.02326	8.23677	3.35552e-06	0.000105315	4.77376
10406423	Mblac2	metallo-beta-lactamase domain containing 2	ENSMUSG00000051098	0.525336	10.49	10.0479	4.31044e-07	2.90993e-05	6.87984
10401317	Gm4787	predicted gene 4787	ENSMUSG00000072974	0.524818	7.47983	7.70192	6.56007e-06	0.000158731	4.08124
10405185	Cks2	CDC28 protein kinase regulatory subunit 2	ENSMUSG00000062248	-0.524475	9.10857	-12.2236	5.26703e-08	8.13432e-06	9.00374
10430020	Vps28	vacuolar protein sorting 28 (yeast)	ENSMUSG00000062381	-0.524041	11.2922	-11.2386	1.30728e-07	1.40365e-05	8.09049
10411633	Naip1	NLR family, apoptosis inhibitory protein 1	ENSMUSG00000021640	0.522966	5.88653	7.68238	6.72682e-06	0.000160334	4.05528
10569437	Phlda2	pleckstrin homology-like domain, family A, member 2	ENSMUSG00000010760	0.522841	7.13649	8.55531	2.28471e-06	8.09993e-05	5.17
10423505	Cmbl	carboxymethylenebutenolidase-like (Pseudomonas)	ENSMUSG00000022235	-0.522153	8.74975	-10.2657	3.43621e-07	2.4675e-05	7.11077
10471474	Ak1	adenylate kinase 1	ENSMUSG00000026817	-0.521472	9.51624	-11.0151	1.62195e-07	1.57637e-05	7.87257
10455050	Pcdhb2	protocadherin beta 2	ENSMUSG00000051599	0.520992	6.60423	6.55699	3.09043e-05	0.000433123	2.47566
10385500	Irgm1	immunity-related GTPase family M member 1	ENSMUSG00000046879	0.52085	6.77411	10.2929	3.34144e-07	2.46218e-05	7.13924
10432176	Snora34	small nucleolar RNA, H/ACA box 34	NA	0.520673	9.45383	2.34218	0.0377923	0.0873453	-4.7495
10455069	Pcdhb6	protocadherin beta 6	ENSMUSG00000051678	0.520119	7.68057	9.48522	7.88864e-07	4.30156e-05	6.26224
10525069	Lhx5	LIM homeobox protein 5	ENSMUSG00000029595	-0.519773	6.27524	-5.59496	0.000129855	0.0011573	0.987325
10495878	Ndst4	N-deacetylase/N-sulfotransferase (heparin glucosaminyl) 4	ENSMUSG00000027971	0.519438	5.20044	4.62752	0.000626659	0.00351382	-0.6389
10534168	Auts2	autism susceptibility candidate 2	ENSMUSG00000029673	-0.519188	9.29119	-7.42117	9.45055e-06	0.00019804	3.7035
10352459	Rab3gap2	RAB3 GTPase activating protein subunit 2	ENSMUSG00000039318	-0.519043	8.87163	-9.7769	5.74686e-07	3.59945e-05	6.58626
10368508	Cenpw	centromere protein W	ENSMUSG00000075266	0.518783	7.84102	3.76475	0.00282823	0.0110221	-2.18108
10410287	Zfp458	zinc finger protein 458	ENSMUSG00000055480	0.517913	9.4564	7.89642	5.12161e-06	0.000135833	4.33713
10499483	Fdps	farnesyl diphosphate synthetase	ENSMUSG00000059743	-0.517334	10.5538	-7.69489	6.61956e-06	0.000158785	4.07191
10376885	Snord49b	small nucleolar RNA, C/D box 49B	ENSMUSG00000064437	0.517019	12.4592	6.98341	1.70206e-05	0.000289427	3.09406
10547100	Plxnd1	plexin D1	ENSMUSG00000030123	-0.516537	8.29343	-9.31441	9.53065e-07	4.73341e-05	6.06851
10365003	Snord37	small nucleolar RNA, C/D box 37	NA	0.516531	7.18319	4.62234	0.000632174	0.00353707	-0.647921
10606445	Rps6ka6	ribosomal protein S6 kinase polypeptide 6	ENSMUSG00000025665	-0.51623	8.31409	-5.70167	0.000110042	0.00104517	1.15885
10440513	Cyyr1	cysteine and tyrosine-rich protein 1	ENSMUSG00000041134	-0.515623	7.52812	-5.89129	8.23193e-05	0.000859322	1.4597
10410656	Cast	calpastatin	ENSMUSG00000021585	0.514687	9.10355	9.69654	6.2662e-07	3.73981e-05	6.49784
10572724	Zfp709	zinc finger protein 709	ENSMUSG00000056019	0.51434	5.96581	3.22767	0.0074954	0.0239657	-3.16413
10469289	Il15ra	interleukin 15 receptor, alpha chain	ENSMUSG00000023206	0.513509	7.40211	8.23245	3.37328e-06	0.000105347	4.76832
10432593	Csrnp2	cysteine-serine-rich nuclear protein 2	ENSMUSG00000044636	-0.513006	8.65152	-8.93312	1.46811e-06	6.16229e-05	5.62503
10563570	Tph1	tryptophan hydroxylase 1	ENSMUSG00000040046	0.512792	6.98932	9.92871	4.88787e-07	3.18531e-05	6.75159
10567108	Sox6	SRY (sex determining region Y)-box 6	ENSMUSG00000051910	-0.512638	7.10204	-8.48101	2.49661e-06	8.45247e-05	5.07862
10488734	Sun5	Sad1 and UNC84 domain containing 5	ENSMUSG00000027480	-0.511018	5.94747	-3.65603	0.00343917	0.0128729	-2.37949
10498885	Gria2	glutamate receptor, ionotropic, AMPA2 (alpha 2)	ENSMUSG00000033981	0.510755	8.97324	11.0672	1.54186e-07	1.55205e-05	7.92377
10541998	Akap3	A kinase (PRKA) anchor protein 3	ENSMUSG00000030344	0.510213	7.90748	8.08546	4.0431e-06	0.000117395	4.58137
10402394	Serpina1d	serine (or cysteine) peptidase inhibitor, clade A, member 1D	c("ENSMUSG00000071177", "ENSMUSG00000066366")	-0.510197	7.24304	-6.91253	1.87639e-05	0.000310637	2.99299
10528031	Zfp804b	zinc finger protein 804B	ENSMUSG00000092094	-0.509573	5.23736	-4.24632	0.00120641	0.00577295	-1.31168
10414576	Gm5622	predicted gene 5622	ENSMUSG00000079244	-0.508818	5.94946	-4.96165	0.000358545	0.00237298	-0.0632309
10410465	BC018507	cDNA sequence BC018507	ENSMUSG00000034525	0.508153	10.2747	10.9053	1.80558e-07	1.66481e-05	7.76405
10363575	Dna2	DNA replication helicase 2 homolog (yeast)	ENSMUSG00000036875	0.508044	8.99241	7.47156	8.84513e-06	0.000191034	3.77203
10419578	Ndrg2	N-myc downstream regulated gene 2	ENSMUSG00000004558	-0.507471	7.93125	-6.39825	3.88241e-05	0.000508828	2.23906
10566632	Cyb5r2	cytochrome b5 reductase 2	ENSMUSG00000048065	0.50746	8.80405	6.93286	1.82452e-05	0.000303867	3.02205
10508829	Map3k6	mitogen-activated protein kinase kinase kinase 6	ENSMUSG00000028862	-0.506076	8.01329	-8.70519	1.91372e-06	7.31366e-05	5.35242
10400072	Scin	scinderin	ENSMUSG00000002565	0.504503	6.77167	7.86638	5.31972e-06	0.000139265	4.29791
10455054	Pcdhb3	protocadherin beta 3	ENSMUSG00000045498	0.504054	6.7507	6.75229	2.34479e-05	0.000361512	2.76197
10472809	Dlx1	distal-less homeobox 1	ENSMUSG00000041911	-0.504002	7.67205	-8.30035	3.10502e-06	9.94109e-05	4.8538
10399973	Hdac9	histone deacetylase 9	ENSMUSG00000004698	-0.503936	7.39772	-6.59258	2.93768e-05	0.000419233	2.52823
10411235	Iqgap2	IQ motif containing GTPase activating protein 2	ENSMUSG00000021676	0.503813	9.9731	10.4975	2.7115e-07	2.15519e-05	7.35165
10529895	Qdpr	quinoid dihydropteridine reductase	ENSMUSG00000015806	-0.503717	9.40317	-8.53764	2.33327e-06	8.16136e-05	5.14833
10520362	Insig1	insulin induced gene 1	ENSMUSG00000045294	-0.503526	10.2893	-5.85142	8.74627e-05	0.000895599	1.39687
10441361	Tiam2	T cell lymphoma invasion and metastasis 2	ENSMUSG00000023800	0.503438	8.40613	8.63905	2.06876e-06	7.56784e-05	5.27224
10426244	Mapk8ip2	mitogen-activated protein kinase 8 interacting protein 2	ENSMUSG00000022619	-0.503409	9.16928	-10.6759	2.26608e-07	1.94793e-05	7.53383
10586591	Car12	carbonic anyhydrase 12	ENSMUSG00000032373	0.502547	9.23615	8.50444	2.42758e-06	8.34408e-05	5.10751
10529656	Nsg1	neuron specific gene family member 1	ENSMUSG00000029126	-0.502083	8.09461	-8.53327	2.34547e-06	8.16136e-05	5.14296
10431612	Rabl2	RAB, member of RAS oncogene family-like 2	ENSMUSG00000022621	-0.501825	7.77032	-8.10393	3.95163e-06	0.000116027	4.605
10420670	Dleu2	deleted in lymphocytic leukemia, 2	ENSMUSG00000097589	0.501757	3.36491	3.96562	0.00197632	0.00840159	-1.81628
10497505	Nlgn1	neuroligin 1	ENSMUSG00000063887	-0.501516	5.91576	-5.73164	0.000105073	0.00101333	1.20674
10455104	Pcdhb15	protocadherin beta 15	ENSMUSG00000047033	0.500558	8.01628	8.48225	2.49289e-06	8.45247e-05	5.08016
10359908	Rgs4	regulator of G-protein signaling 4	ENSMUSG00000038530	-0.500064	6.81878	-8.1619	3.67857e-06	0.000111185	4.67891
10392010	Kansl1	KAT8 regulatory NSL complex subunit 1	ENSMUSG00000018412	0.499155	9.59831	8.21133	3.46173e-06	0.00010668	4.74161
10563441	Emp3	epithelial membrane protein 3	ENSMUSG00000040212	-0.49893	8.3966	-7.76795	6.02836e-06	0.000151367	4.16864
10490203	Gnas	GNAS (guanine nucleotide binding protein, alpha stimulating) complex locus	ENSMUSG00000027523	-0.498798	9.97967	-2.74067	0.018311	0.0486537	-4.04887
10425695	Srebf2	sterol regulatory element binding factor 2	ENSMUSG00000022463	-0.497936	10.948	-11.0227	1.61e-07	1.57637e-05	7.88005
10463005	Cyp2c55	cytochrome P450, family 2, subfamily c, polypeptide 55	ENSMUSG00000025002	0.497635	8.39195	8.44686	2.60098e-06	8.72723e-05	5.03642
10377541	Naa38	N(alpha)-acetyltransferase 38, NatC auxiliary subunit	ENSMUSG00000059278	-0.497302	9.55611	-10.4984	2.70883e-07	2.15519e-05	7.35265
10361270	Cd46	CD46 antigen, complement regulatory protein	ENSMUSG00000016493	0.496894	6.50886	5.36544	0.000186414	0.00148841	0.612958
10485361	B230118H07Rik	RIKEN cDNA B230118H07 gene	ENSMUSG00000027165	-0.496546	5.86656	-5.09425	0.000288512	0.00202912	0.161246
10426089	Zdhhc25	zinc finger, DHHC domain containing 25	ENSMUSG00000054117	0.496298	6.82563	7.72081	6.40301e-06	0.000157271	4.1063
10359917	Hsd17b7	hydroxysteroid (17-beta) dehydrogenase 7	ENSMUSG00000026675	-0.496186	9.42088	-7.89829	5.10954e-06	0.000135833	4.33957
10420666	Mir16-1	microRNA 16-1	ENSMUSG00000092995	0.49559	6.89067	4.8981	0.000398251	0.00254384	-0.171643
10551104	Tmem145	transmembrane protein 145	ENSMUSG00000043843	0.495016	8.10379	5.97623	7.24002e-05	0.000786359	1.59281
10457929	Rit2	Ras-like without CAAX 2	ENSMUSG00000057455	-0.494482	5.93536	-7.62649	7.22949e-06	0.00016677	3.98074
10602401	Fgd1	FYVE, RhoGEF and PH domain containing 1	ENSMUSG00000025265	-0.493757	8.86296	-10.4894	2.73365e-07	2.15519e-05	7.34339
10471505	Sh2d3c	SH2 domain containing 3C	ENSMUSG00000059013	-0.493694	9.20287	-9.28483	9.85065e-07	4.80763e-05	6.03465
10406968	Cenpk	centromere protein K	ENSMUSG00000021714	0.492915	8.38435	5.34277	0.000193271	0.00152421	0.575577
10546736	Cntn3	contactin 3	ENSMUSG00000030075	0.492834	9.89495	9.46323	8.08184e-07	4.33432e-05	6.23747
10362581	Tube1	epsilon-tubulin 1	ENSMUSG00000019845	0.492618	8.38682	7.91881	4.9791e-06	0.000133653	4.36629
10426557	Pfkm	phosphofructokinase, muscle	ENSMUSG00000033065	-0.491269	9.55806	-9.96334	4.71197e-07	3.10659e-05	6.78899
10595573	Snx14	sorting nexin 14	ENSMUSG00000032422	0.490496	9.09969	11.4068	1.11408e-07	1.29486e-05	8.25177
10420668	Mir15a	microRNA 15a	ENSMUSG00000093007	0.490496	9.70515	7.67518	6.78941e-06	0.000160696	4.0457
10391407	Coa3	cytochrome C oxidase assembly factor 3	ENSMUSG00000017188	-0.489463	9.26878	-9.60472	6.92213e-07	3.92161e-05	6.39602
10424667	Them6	thioesterase superfamily member 6	ENSMUSG00000056665	-0.489409	9.61648	-6.39536	3.89871e-05	0.000508828	2.23471
10428353	Lrp12	low density lipoprotein-related protein 12	ENSMUSG00000022305	-0.489116	9.38717	-11.5	1.02042e-07	1.24112e-05	8.34023
10508608	Pef1	penta-EF hand domain containing 1	ENSMUSG00000028779	-0.488442	8.47496	-8.37523	2.83547e-06	9.31984e-05	4.94744
10529890	4930435H24Rik	RIKEN cDNA 4930435H24 gene	NA	0.487525	8.06863	6.99729	1.66999e-05	0.000285697	3.11378
10441195	Dscam	Down syndrome cell adhesion molecule	ENSMUSG00000050272	-0.486632	8.45022	-6.83049	2.10229e-05	0.000335236	2.87516
10602716	Ubqln2	ubiquilin 2	ENSMUSG00000050148	-0.486181	9.88684	-9.48379	7.90105e-07	4.30156e-05	6.26063
10523483	Prdm8	PR domain containing 8	ENSMUSG00000035456	-0.485856	6.71093	-6.28127	4.60326e-05	0.000574084	2.06243
10408613	Tubb2b	tubulin, beta 2B class IIB	ENSMUSG00000045136	-0.485165	10.346	-7.67058	6.82975e-06	0.000161085	4.03958
10554900	Dlg2	discs, large homolog 2 (Drosophila)	ENSMUSG00000052572	-0.484909	9.58956	-11.4104	1.11031e-07	1.29486e-05	8.25518
10605338	G6pdx	glucose-6-phosphate dehydrogenase X-linked	ENSMUSG00000031400	-0.48455	11.0048	-12.1918	5.41848e-08	8.25513e-06	8.97539
10571233	Fut10	fucosyltransferase 10	ENSMUSG00000046152	0.483969	7.29469	7.07853	1.49477e-05	0.000262492	3.22864
10402061	Eml5	echinoderm microtubule associated protein like 5	ENSMUSG00000051166	0.483967	9.55561	8.67579	1.98106e-06	7.46972e-05	5.31683
10565775	Dgat2	diacylglycerol O-acyltransferase 2	ENSMUSG00000030747	-0.483604	9.00485	-5.62806	0.000123334	0.00112407	1.0407
10392415	Rgs9	regulator of G-protein signaling 9	ENSMUSG00000020599	0.483295	8.02324	7.21634	1.24089e-05	0.000233552	3.42149
10356677	Myeov2	myeloma overexpressed 2	ENSMUSG00000073616	-0.482723	9.31278	-10.6524	2.31987e-07	1.9518e-05	7.51003
10512949	Abca1	ATP-binding cassette, sub-family A (ABC1), member 1	ENSMUSG00000015243	-0.482659	8.27414	-10.3227	3.24035e-07	2.4034e-05	7.1705
10439881	5330426P16Rik	RIKEN cDNA 5330426P16 gene	NA	0.482527	8.70202	5.49775	0.000151207	0.00128374	0.829656
10370544	2610008E11Rik	RIKEN cDNA 2610008E11 gene	ENSMUSG00000060301	0.482504	8.9054	8.16702	3.65546e-06	0.000111083	4.68542
10526482	Polr2j	polymerase (RNA) II (DNA directed) polypeptide J	ENSMUSG00000039771	-0.482416	10.2719	-5.74381	0.000103123	0.00100064	1.22615
10474064	Trp53i11	transformation related protein 53 inducible protein 11	ENSMUSG00000068735	-0.482084	11.5236	-10.1214	3.99113e-07	2.76049e-05	6.9583
10440170	Olfr198	olfactory receptor 198	ENSMUSG00000052537	0.481633	4.46974	2.69222	0.0200091	0.0520736	-4.13558
10529732	Hs3st1	heparan sulfate (glucosamine) 3-O-sulfotransferase 1	ENSMUSG00000051022	0.480401	6.82981	7.48347	8.70811e-06	0.000188799	3.78819
10365420	AI597468	expressed sequence AI597468	ENSMUSG00000060935	0.480373	8.64218	7.2844	1.13289e-05	0.000222126	3.51579
10437846	Ifitm7	interferon induced transmembrane protein 7	ENSMUSG00000065968	-0.480115	7.12075	-4.92786	0.000379111	0.00247113	-0.12081
10583386	Olfr835	olfactory receptor 835	ENSMUSG00000045204	0.479724	4.80728	5.24561	0.000225808	0.00170856	0.414603
10518763	Slc45a1	solute carrier family 45, member 1	ENSMUSG00000039838	-0.479545	7.38751	-8.11337	3.9057e-06	0.000115572	4.61707
10410644	Zfp72	zinc finger protein 72	ENSMUSG00000069184	0.47954	8.48525	7.86207	5.34876e-06	0.000139265	4.29229
10398693	Snora28	small nucleolar RNA, H/ACA box 28	NA	0.478993	8.84699	4.06831	0.00164809	0.00736448	-1.63088
10511333	Plag1	pleiomorphic adenoma gene 1	ENSMUSG00000003282	0.478745	6.52044	4.57409	0.000686131	0.00375872	-0.732209
10484999	Ddb2	damage specific DNA binding protein 2	ENSMUSG00000002109	0.478228	7.06823	5.82212	9.14596e-05	0.000927955	1.35055
10535647	Atp5j2	ATP synthase, H+ transporting, mitochondrial F0 complex, subunit F2	ENSMUSG00000038690	-0.477903	11.6829	-10.8993	1.81632e-07	1.66481e-05	7.75804
10467319	Rbp4	retinol binding protein 4, plasma	ENSMUSG00000024990	-0.477826	9.9234	-6.76821	2.2931e-05	0.000355604	2.78508
10556790	2610020H08Rik	RIKEN cDNA 2610020H08 gene	ENSMUSG00000030924	0.477394	7.67861	5.7131	0.000108117	0.00103123	1.17714
10595895	4930579K19Rik	RIKEN cDNA 4930579K19 gene	NA	0.477133	7.15311	8.22329	3.41137e-06	0.00010595	4.75673
10378855	Ssh2	slingshot homolog 2 (Drosophila)	ENSMUSG00000037926	0.476683	6.4451	3.31581	0.00637958	0.0210509	-3.00262
10411927	Cwc27	CWC27 spliceosome-associated protein homolog (S. cerevisiae)	ENSMUSG00000021715	0.476618	9.24268	10.1525	3.86408e-07	2.72273e-05	6.99126
10465734	Slc22a27	solute carrier family 22, member 27	ENSMUSG00000067656	0.4759	3.83781	4.55673	0.000706704	0.00383601	-0.762602
10586920	Rfx7	regulatory factor X, 7	ENSMUSG00000037674	0.475511	8.6437	7.63512	7.14935e-06	0.000166532	3.99227
10411019	Msh3	mutS homolog 3 (E. coli)	ENSMUSG00000014850	0.474797	9.3526	10.2077	3.64866e-07	2.58711e-05	7.04969
10535956	Stard13	StAR-related lipid transfer (START) domain containing 13	ENSMUSG00000016128	-0.474274	7.59006	-7.04018	1.57489e-05	0.000271904	3.17454
10576152	Trappc2l	trafficking protein particle complex 2-like	ENSMUSG00000015013	-0.473559	10.9742	-10.4912	2.72864e-07	2.15519e-05	7.34525
10410955	Atp6ap1l	ATPase, H+ transporting, lysosomal accessory protein 1-like	ENSMUSG00000078958	0.47233	7.17297	7.26887	1.15661e-05	0.000224051	3.49434
10406757	Col4a3bp	collagen, type IV, alpha 3 (Goodpasture antigen) binding protein	ENSMUSG00000021669	0.472107	9.53944	8.39635	2.76404e-06	9.13836e-05	4.97374
10454441	Syt4	synaptotagmin IV	ENSMUSG00000024261	-0.472078	7.12801	-4.5742	0.000686004	0.00375872	-0.732018
10533050	Hspb8	heat shock protein 8	ENSMUSG00000041548	-0.472019	10.4473	-8.33069	2.99262e-06	9.69506e-05	4.89182
10365217	Gm10776	predicted gene 10776	NA	0.47171	7.2624	8.29601	3.12147e-06	9.94109e-05	4.84835
10573803	Cyld	cylindromatosis (turban tumor syndrome)	ENSMUSG00000036712	0.471679	8.359	7.3129	1.09069e-05	0.00021741	3.55511
10502451	Bmpr1b	bone morphogenetic protein receptor, type 1B	ENSMUSG00000052430	-0.471513	7.07395	-7.54273	8.05952e-06	0.000178864	3.86829
10387723	2810408A11Rik	RIKEN cDNA 2810408A11 gene	ENSMUSG00000018570	0.471404	7.9051	7.18507	1.29415e-05	0.000238926	3.37795
10451039	Slc25a27	solute carrier family 25, member 27	ENSMUSG00000023912	0.47133	8.34925	7.82674	5.59372e-06	0.000143981	4.246
10425335	Syngr1	synaptogyrin 1	ENSMUSG00000022415	-0.471316	10.1513	-9.13829	1.16155e-06	5.46919e-05	5.86558
10394258	Adcy3	adenylate cyclase 3	ENSMUSG00000020654	-0.470324	7.83263	-8.10002	3.97077e-06	0.000116276	4.60001
10483228	Scn3a	sodium channel, voltage-gated, type III, alpha	ENSMUSG00000057182	0.470209	7.63319	9.43047	8.37903e-07	4.42233e-05	6.20048
10425158	Pdxp	pyridoxal (pyridoxine, vitamin B6) phosphatase	ENSMUSG00000068221	-0.469623	9.25007	-9.82933	5.43313e-07	3.48029e-05	6.64361
10425852	Parvb	parvin, beta	ENSMUSG00000022438	-0.468686	8.63721	-6.44668	3.62008e-05	0.000485289	2.31161
10368486	Rnf146	ring finger protein 146	ENSMUSG00000038876	0.468448	7.25549	4.78979	0.000476915	0.00287712	-0.357577
10552796	Tsks	testis-specific serine kinase substrate	ENSMUSG00000059891	-0.468288	7.58172	-6.61775	2.83449e-05	0.000412336	2.56531
10346876	Snora41	small nucleolar RNA, H/ACA box 41	NA	0.468084	6.84986	6.03838	6.59499e-05	0.000736888	1.68957
10548727	D230041D01Rik	RIKEN cDNA D230041D01 gene	NA	0.468002	7.52123	6.92301	1.84945e-05	0.000307533	3.00798
10455065	Pcdhb5	protocadherin beta 5	ENSMUSG00000063687	0.467493	6.38442	5.99749	7.01219e-05	0.000769022	1.62597
10475362	Wdr76	WD repeat domain 76	ENSMUSG00000027242	0.467457	8.49471	11.2013	1.35481e-07	1.44095e-05	8.05444
10359255	Brinp2	bone morphogenic protein/retinoic acid inducible neural-specific 2	ENSMUSG00000004031	-0.46743	8.09458	-6.4834	3.43379e-05	0.000468547	2.3664
10490384	Lama5	laminin, alpha 5	ENSMUSG00000015647	0.46725	7.97345	10.3909	3.02176e-07	2.27116e-05	7.24154
10520862	Fosl2	fos-like antigen 2	ENSMUSG00000029135	-0.467166	8.51797	-6.90826	1.88749e-05	0.000312016	2.98688
10491825	3110057O12Rik	RIKEN cDNA 3110057O12 gene	ENSMUSG00000037818	0.466992	8.04174	7.26396	1.16422e-05	0.000224367	3.48754
10425116	Cdc42ep1	CDC42 effector protein (Rho GTPase binding) 1	ENSMUSG00000049521	-0.46669	8.16169	-7.28246	1.13583e-05	0.000222314	3.51312
10419704	Sall2	sal-like 2 (Drosophila)	ENSMUSG00000049532	-0.466587	7.22835	-7.43494	9.28083e-06	0.000196677	3.72226
10373692	Vmn2r87	vomeronasal 2, receptor 87	ENSMUSG00000091511	-0.466282	5.04088	-2.49251	0.0287984	0.0699878	-4.48894
10406287	Ttc37	tetratricopeptide repeat domain 37	ENSMUSG00000033991	0.466123	9.61131	10.0891	4.1283e-07	2.82075e-05	6.92386
10444041	Ndufa7	NADH dehydrogenase (ubiquinone) 1 alpha subcomplex, 7 (B14.5a)	ENSMUSG00000041881	-0.465636	9.91493	-9.0782	1.24351e-06	5.60993e-05	5.79559
10466712	Mamdc2	MAM domain containing 2	ENSMUSG00000033207	0.465036	9.82574	10.3774	3.06386e-07	2.28755e-05	7.22747
10556581	Gm10589	predicted gene 10589	NA	0.464682	9.36999	8.39897	2.75533e-06	9.13637e-05	4.977
10527233	Cyth3	cytohesin 3	ENSMUSG00000018001	-0.464574	10.4297	-9.74532	5.94517e-07	3.66262e-05	6.55159
10561008	Ceacam1	carcinoembryonic antigen-related cell adhesion molecule 1	ENSMUSG00000074272	0.464541	5.89901	4.3487	0.00100996	0.00503598	-1.12944
10515830	Olfr1333	olfactory receptor 1333	ENSMUSG00000073770	0.462955	7.03958	5.21375	0.000237697	0.00176768	0.361531
10562651	9830147E19Rik	RIKEN cDNA 9830147E19 gene	ENSMUSG00000074158	0.462612	6.11418	6.99284	1.68019e-05	0.000286719	3.10746
10448184	4930515G13Rik	RIKEN cDNA 4930515G13 gene	NA	-0.462577	5.7605	-3.93902	0.0020719	0.00872394	-1.86444
10424607	Ptp4a3	protein tyrosine phosphatase 4a3	ENSMUSG00000059895	-0.462218	9.23422	-7.36353	1.01981e-05	0.000210087	3.62469
10511017	2010015L04Rik	RIKEN cDNA 2010015L04 gene	ENSMUSG00000042233	0.461841	7.47319	8.24369	3.32721e-06	0.000105073	4.7825
10410576	Cep72	centrosomal protein 72	ENSMUSG00000021572	0.461667	7.21032	9.30703	9.60948e-07	4.75163e-05	6.06007
10427461	Ptger4	prostaglandin E receptor 4 (subtype EP4)	ENSMUSG00000039942	-0.46145	8.07754	-9.14143	1.15744e-06	5.46919e-05	5.86922
10466835	Snora19	small nucleolar RNA, H/ACA box 19	NA	0.461366	5.82219	2.97278	0.0119619	0.0346681	-3.62951
10572733	Zfp961	zinc finger protein 961	ENSMUSG00000052446	0.461267	8.78613	7.16463	1.33028e-05	0.000243468	3.34943
10548931	Slc15a5	solute carrier family 15, member 5	ENSMUSG00000044378	0.460843	8.45074	8.65648	2.02664e-06	7.49126e-05	5.29342
10395534	Gm2027	nuclear assembly factor 1 homolog pseudogene	NA	-0.460477	6.27963	-3.86118	0.00237995	0.00967252	-2.00562
10501235	Gstm4	glutathione S-transferase, mu 4	ENSMUSG00000027890	-0.459682	8.6512	-6.24962	4.82187e-05	0.000589607	2.01431
10424140	Col14a1	collagen, type XIV, alpha 1	ENSMUSG00000022371	-0.459531	7.18921	-7.26956	1.15555e-05	0.000224051	3.49528
10362711	Mettl24	methyltransferase like 24	ENSMUSG00000045555	-0.458942	7.18596	-5.01696	0.000327375	0.00222742	0.0306876
10406614	Mtx3	metaxin 3	ENSMUSG00000021704	0.458936	8.99753	7.03573	1.58449e-05	0.000273142	3.16824
10501199	Gstm7	glutathione S-transferase, mu 7	ENSMUSG00000004035	-0.458647	6.75163	-5.54608	0.000140161	0.00122576	0.90822
10428827	Tmem65	transmembrane protein 65	ENSMUSG00000062373	-0.458095	9.26199	-8.368	2.86035e-06	9.34713e-05	4.93843
10575598	Znrf1	zinc and ring finger 1	ENSMUSG00000033545	0.457614	9.65777	8.73257	1.85325e-06	7.1799e-05	5.38547
10506571	Dhcr24	24-dehydrocholesterol reductase	ENSMUSG00000034926	-0.457518	10.5478	-8.4814	2.49544e-06	8.45247e-05	5.07911
10515826	Olfr1337	olfactory receptor 1337	ENSMUSG00000061075	0.457304	6.95114	5.86337	8.58862e-05	0.000886146	1.41573
10426921	Dazap2	DAZ associated protein 2	ENSMUSG00000000346	-0.457219	9.87781	-6.32529	4.31653e-05	0.000548642	2.12913
10455128	Pcdhb20	protocadherin beta 20	ENSMUSG00000046191	0.456538	6.78888	6.73141	2.41446e-05	0.000368192	2.73161
10586759	Bnip2	BCL2/adenovirus E1B interacting protein 2	ENSMUSG00000011958	0.456395	9.80564	10.4029	2.98523e-07	2.27116e-05	7.2539
10361186	Sertad4	SERTA domain containing 4	ENSMUSG00000016262	-0.45622	7.96585	-6.64947	2.70996e-05	0.000400946	2.6119
10530841	Igfbp7	insulin-like growth factor binding protein 7	ENSMUSG00000036256	-0.456109	11.088	-7.24963	1.18675e-05	0.000226534	3.4677
10487040	Fbn1	fibrillin 1	ENSMUSG00000027204	0.45598	7.98706	9.77101	5.7833e-07	3.60226e-05	6.5798
10580452	Siah1a	seven in absentia 1A	ENSMUSG00000036840	0.455915	7.91771	5.1965	0.000244411	0.00180712	0.332731
10586184	Tipin	timeless interacting protein	ENSMUSG00000032397	0.455788	8.79451	5.50202	0.000150195	0.00128374	0.83661
10603843	Syn1	synapsin I	ENSMUSG00000037217	-0.454471	9.2615	-9.45198	8.18257e-07	4.35143e-05	6.22478
10471424	Fam102a	family with sequence similarity 102, member A	ENSMUSG00000039157	-0.453653	7.29212	-7.50149	8.50513e-06	0.00018655	3.8126
10521984	G6pd2	glucose-6-phosphate dehydrogenase 2	ENSMUSG00000089992	-0.453425	9.10705	-9.31864	9.48587e-07	4.73202e-05	6.07334
10368616	Zufsp	zinc finger with UFM1-specific peptidase domain	ENSMUSG00000039531	0.452743	8.60663	8.00737	4.4558e-06	0.000123731	4.481
10594911	Tex9	testis expressed gene 9	ENSMUSG00000090626	0.452618	7.312	7.19708	1.27341e-05	0.000236905	3.39469
10489569	Pltp	phospholipid transfer protein	ENSMUSG00000017754	0.452547	8.05932	6.85497	2.03199e-05	0.000327735	2.91041
10420437	Zdhhc20	zinc finger, DHHC domain containing 20	ENSMUSG00000021969	0.452048	5.12238	3.50663	0.00450678	0.0159277	-2.65288
10604505	Firre	functional intergenic repeating RNA element	NA	0.452034	7.64186	4.90804	0.000391745	0.00252085	-0.154643
10456021	Camk2a	calcium/calmodulin-dependent protein kinase II alpha	ENSMUSG00000024617	-0.451584	8.10393	-6.89479	1.92296e-05	0.000315567	2.96758
10352777	Slc30a1	solute carrier family 30 (zinc transporter), member 1	ENSMUSG00000037434	-0.450736	8.94985	-7.80166	5.77493e-06	0.000146968	4.21305
10411306	Polk	polymerase (DNA directed), kappa	ENSMUSG00000021668	0.450274	8.12369	7.39592	9.7705e-06	0.000203022	3.66903
10399391	Gen1	Gen homolog 1, endonuclease (Drosophila)	ENSMUSG00000051235	0.450109	8.6982	7.92213	4.95834e-06	0.000133653	4.37061
10495332	1700013F07Rik	RIKEN cDNA 1700013F07 gene	ENSMUSG00000027886	-0.449822	7.78778	-8.65677	2.02594e-06	7.49126e-05	5.29377
10406482	Ccnh	cyclin H	ENSMUSG00000021548	0.449751	10.6347	6.47179	3.49152e-05	0.000473118	2.34911
10484371	Calcrl	calcitonin receptor-like	ENSMUSG00000059588	-0.449705	5.36413	-4.45981	0.000834042	0.00433501	-0.932927
10568553	Chst15	carbohydrate (N-acetylgalactosamine 4-sulfate 6-O) sulfotransferase 15	ENSMUSG00000030930	0.449223	7.36676	4.27877	0.00114017	0.00552633	-1.2538
10406536	Tmem167	transmembrane protein 167	ENSMUSG00000012422	0.449203	8.74744	7.93764	4.86255e-06	0.000132097	4.39076
10470298	Fam69b	family with sequence similarity 69, member B	ENSMUSG00000036186	-0.449012	9.31932	-7.37221	1.00816e-05	0.000208551	3.63658
10581926	Adat1	adenosine deaminase, tRNA-specific 1	ENSMUSG00000031949	0.448773	8.26587	7.91979	4.97296e-06	0.000133653	4.36757
10573490	Hook2	hook homolog 2 (Drosophila)	ENSMUSG00000052566	0.448744	7.97684	9.08447	1.23468e-06	5.60993e-05	5.80291
10477061	Srxn1	sulfiredoxin 1 homolog (S. cerevisiae)	ENSMUSG00000032802	-0.448586	8.45359	-10.3929	3.01587e-07	2.27116e-05	7.24352
10596543	Rad54l2	RAD54 like 2 (S. cerevisiae)	ENSMUSG00000040661	0.448435	7.7354	4.21428	0.00127573	0.00602538	-1.36891
10525718	Arl6ip4	ADP-ribosylation factor-like 6 interacting protein 4	ENSMUSG00000029404	-0.448357	8.15026	-5.41877	0.00017128	0.00139908	0.700603
10532630	Adrbk2	adrenergic receptor kinase, beta 2	ENSMUSG00000042249	-0.448193	9.38639	-9.29629	9.72533e-07	4.78792e-05	6.04778
10603833	Usmg5	upregulated during skeletal muscle growth 5	ENSMUSG00000071528	-0.447548	11.3512	-5.6232	0.00012427	0.00112803	1.03287
10409261	Diras2	DIRAS family, GTP-binding RAS-like 2	ENSMUSG00000047842	-0.446889	8.48811	-6.61262	2.8552e-05	0.000413748	2.55776
10407072	Elovl7	ELOVL family member 7, elongation of long chain fatty acids (yeast)	ENSMUSG00000021696	0.446734	9.89029	9.80029	5.60455e-07	3.54976e-05	6.61188
10357242	Dbi	diazepam binding inhibitor	ENSMUSG00000026385	-0.446248	10.3607	-7.98496	4.58238e-06	0.000126622	4.45207
10476297	Mir103-2	microRNA 103-2	NA	0.445736	6.85256	6.69422	2.54409e-05	0.00038345	2.67739
10458046	Nrep	neuronal regeneration related protein	ENSMUSG00000042834	-0.44541	8.22948	-6.73298	2.40913e-05	0.000368029	2.73391
10469018	Gm10862	predicted gene 10862	NA	-0.445399	7.01134	-6.08801	6.12389e-05	0.000697381	1.76642
10391831	Dcakd	dephospho-CoA kinase domain containing	ENSMUSG00000020935	-0.445035	10.5572	-10.0803	4.16641e-07	2.82964e-05	6.91449
10430096	Lrrc24	leucine rich repeat containing 24	ENSMUSG00000033707	-0.444855	8.44397	-8.05482	4.19991e-06	0.00012079	4.54208
10476355	Chgb	chromogranin B	ENSMUSG00000027350	-0.444462	12.1114	-7.11896	1.41497e-05	0.000253212	3.28549
10380699	Copz2	coatomer protein complex, subunit zeta 2	ENSMUSG00000018672	0.444095	8.0726	8.70776	1.90796e-06	7.31366e-05	5.35553
10489018	Rbm39	RNA binding motif protein 39	ENSMUSG00000027620	0.443916	10.1926	10.2144	3.62339e-07	2.58545e-05	7.05677
10391828	C1ql1	complement component 1, q subcomponent-like 1	ENSMUSG00000045532	-0.44385	9.98333	-7.93022	4.90815e-06	0.000133016	4.38112
10389929	Cacna1g	calcium channel, voltage-dependent, T type, alpha 1G subunit	ENSMUSG00000020866	0.443842	7.71569	7.80721	5.73427e-06	0.000146595	4.22035
10488982	Cpne1	copine I	ENSMUSG00000074643	0.443765	8.56464	8.97153	1.40469e-06	6.04448e-05	5.6704
10597648	Myd88	myeloid differentiation primary response gene 88	ENSMUSG00000032508	0.44358	7.07752	7.52654	8.23144e-06	0.000181253	3.84645
10439980	Pcnp	PEST proteolytic signal containing nuclear protein	ENSMUSG00000071533	0.44355	7.72955	8.15663	3.70254e-06	0.000111313	4.67221
10507152	Cyp4a12b	cytochrome P450, family 4, subfamily a, polypeptide 12B	ENSMUSG00000078597	0.443549	5.22403	4.07604	0.00162579	0.00729955	-1.61696
10361375	Fbxo5	F-box protein 5	ENSMUSG00000019773	0.443185	9.57967	5.80164	9.43689e-05	0.000947387	1.31809
10499666	Atp8b2	ATPase, class I, type 8B, member 2	ENSMUSG00000060671	-0.443099	9.52375	-8.48659	2.47997e-06	8.45247e-05	5.08551
10408600	Serpinb6a	serine (or cysteine) peptidase inhibitor, clade B, member 6a	ENSMUSG00000060147	0.442348	6.92212	6.40264	3.85783e-05	0.000507859	2.24565
10469622	Gpr158	G protein-coupled receptor 158	ENSMUSG00000045967	-0.442226	5.83183	-4.9178	0.000385471	0.00249615	-0.13798
10546510	Lrig1	leucine-rich repeats and immunoglobulin-like domains 1	ENSMUSG00000030029	0.441982	8.80558	8.41135	2.71452e-06	9.08116e-05	4.99238
10424340	Ndufb9	NADH dehydrogenase (ubiquinone) 1 beta subcomplex, 9	ENSMUSG00000022354	-0.441913	11.3633	-9.6757	6.40894e-07	3.80287e-05	6.4748
10484758	Olfr1198	olfactory receptor 1198	ENSMUSG00000075117	-0.441586	3.76261	-2.52393	0.0272001	0.0668674	-4.43383
10352127	Cox20	COX20 Cox2 chaperone	ENSMUSG00000026500	-0.441371	8.51576	-6.12068	5.83332e-05	0.000675218	1.81683
10541482	Nhp2l1	NHP2 non-histone chromosome protein 2-like 1 (S. cerevisiae)	c("ENSMUSG00000063480", "ENSMUSG00000063543")	-0.441224	11.6131	-9.21245	1.06833e-06	5.14718e-05	5.95142
10601854	Wbp5	WW domain binding protein 5	ENSMUSG00000042712	-0.441149	9.31987	-4.10654	0.00154083	0.0069924	-1.5621
10430510	Tmem184b	transmembrane protein 184b	ENSMUSG00000009035	-0.441011	9.93532	-7.86275	5.34422e-06	0.000139265	4.29316
10441811	Tcp1	t-complex protein 1	ENSMUSG00000068039	0.440542	7.9828	5.7772	9.7968e-05	0.000973978	1.2793
10521168	Nat8l	N-acetyltransferase 8-like	ENSMUSG00000048142	-0.44042	6.76478	-4.90266	0.000395254	0.00253475	-0.163847
10521602	Cpeb2	cytoplasmic polyadenylation element binding protein 2	ENSMUSG00000039782	-0.440409	9.48206	-8.90745	1.51221e-06	6.22214e-05	5.59461
10574727	Slc9a5	solute carrier family 9 (sodium/hydrogen exchanger), member 5	ENSMUSG00000014786	0.440093	8.39733	7.34421	1.04626e-05	0.000211769	3.59817
10411751	Slc30a5	solute carrier family 30 (zinc transporter), member 5	ENSMUSG00000021629	0.43985	11.3362	9.46668	8.05111e-07	4.33432e-05	6.24137
10557229	Gm20274	predicted gene, 20274	NA	0.439409	8.16517	8.02845	4.34014e-06	0.000122328	4.50817
10492689	Pdgfc	platelet-derived growth factor, C polypeptide	ENSMUSG00000028019	-0.438964	6.78293	-4.52762	0.000742659	0.00397944	-0.81364
10531370	Naaa	N-acylethanolamine acid amidase	ENSMUSG00000029413	-0.438756	10.1007	-7.39532	9.77834e-06	0.000203022	3.6682
10454198	Rnf125	ring finger protein 125	ENSMUSG00000033107	0.438536	8.27087	5.92691	7.79946e-05	0.000830322	1.51565
10419435	Olfr725	olfactory receptor 725	ENSMUSG00000068437	-0.438484	4.79402	-2.53957	0.0264372	0.0653482	-4.40633
10373600	Mettl7b	methyltransferase like 7B	ENSMUSG00000025347	-0.437481	6.21392	-5.09885	0.00028636	0.00202029	0.168985
10594183	Senp8	SUMO/sentrin specific peptidase 8	ENSMUSG00000051705	0.437447	7.4768	8.99055	1.37438e-06	6.00571e-05	5.69282
10385770	Olfr1372-ps1	olfactory receptor 1372, pseudogene 1	NA	0.437098	4.27776	2.67966	0.0204744	0.0531128	-4.15802
10495651	Alg14	asparagine-linked glycosylation 14	ENSMUSG00000039887	-0.437088	9.05632	-5.90507	8.0617e-05	0.0008477	1.48136
10502823	Dnajb4	DnaJ (Hsp40) homolog, subfamily B, member 4	ENSMUSG00000028035	0.436985	8.51981	7.67703	6.77328e-06	0.000160696	4.04816
10423836	Cthrc1	collagen triple helix repeat containing 1	ENSMUSG00000054196	-0.436589	10.5573	-6.99247	1.68105e-05	0.000286719	3.10693
10524525	Ube3b	ubiquitin protein ligase E3B	ENSMUSG00000029577	-0.436459	8.30393	-6.467	3.51571e-05	0.000475253	2.34195
10583203	Phxr4	per-hexamer repeat gene 4	NA	0.436382	7.03842	4.69001	0.000563872	0.00325582	-0.530184
10536294	Peg10	paternally expressed 10	ENSMUSG00000092035	-0.436231	11.7802	-8.98134	1.38896e-06	6.03867e-05	5.68197
10559312	Dhcr7	7-dehydrocholesterol reductase	ENSMUSG00000058454	-0.435976	10.4155	-5.66373	0.000116692	0.00109268	1.09805
10443021	Atp6v0e	ATPase, H+ transporting, lysosomal V0 subunit E	ENSMUSG00000015575	-0.435855	10.6753	-8.39903	2.75512e-06	9.13637e-05	4.97708
10455784	Gramd3	GRAM domain containing 3	ENSMUSG00000001700	-0.435178	8.43155	-7.50307	8.48762e-06	0.000186529	3.81473
10510473	Ctnnbip1	catenin beta interacting protein 1	ENSMUSG00000028988	-0.434944	8.2442	-6.57306	3.02041e-05	0.000428071	2.49943
10381460	Rnu2-10	U2 small nuclear RNA 10	ENSMUSG00000065944	0.434927	11.9667	3.98282	0.00191695	0.00820803	-1.78517
10551841	Polr2i	polymerase (RNA) II (DNA directed) polypeptide I	ENSMUSG00000019738	-0.434735	7.53776	-5.87875	8.39011e-05	0.000870995	1.43997
10518532	Tardbp	TAR DNA binding protein	ENSMUSG00000041459	0.434643	8.86055	4.1681	0.00138304	0.00639033	-1.45159
10399632	F630048H11Rik	RIKEN cDNA F630048H11 gene	NA	0.434636	6.11141	7.05523	1.54292e-05	0.000268017	3.19579
10405927	Zfp455	zinc finger protein 455	ENSMUSG00000051037	0.433811	7.31453	3.60398	0.00377811	0.0138699	-2.47466
10564520	Snora21	small nucleolar RNA, H/ACA box 21	NA	0.433652	8.82614	4.6519	0.000601335	0.00340676	-0.596431
10591612	Dock6	dedicator of cytokinesis 6	ENSMUSG00000032198	0.4335	9.28349	6.63657	2.75989e-05	0.000405143	2.59297
10464924	Rab1b	RAB1B, member RAS oncogene family	ENSMUSG00000024870	-0.433353	9.62102	-7.90378	5.07429e-06	0.000135386	4.34672
10353034	Snord87	small nucleolar RNA, C/D box 87	ENSMUSG00000093178	0.432732	9.13703	4.32038	0.00106073	0.00523124	-1.17975
10438708	Masp1	mannan-binding lectin serine peptidase 1	ENSMUSG00000022887	-0.432617	6.41044	-5.13255	0.000271086	0.00193677	0.225637
10442231	3110052M02Rik	RIKEN cDNA 3110052M02 gene	ENSMUSG00000035868	0.432568	7.37161	9.12285	1.18204e-06	5.4841e-05	5.84763
10369738	Sirt1	sirtuin 1	ENSMUSG00000020063	0.43219	8.53952	8.5435	2.31705e-06	8.16114e-05	5.15552
10567010	Dkk3	dickkopf homolog 3 (Xenopus laevis)	ENSMUSG00000030772	-0.432184	10.2595	-10.4338	2.89264e-07	2.23472e-05	7.28594
10535739	Usp12	ubiquitin specific peptidase 12	ENSMUSG00000029640	-0.431632	8.06718	-4.76389	0.000498042	0.00296302	-0.402262
10423577	Mtdh	metadherin	ENSMUSG00000022255	-0.431545	11.1538	-6.35932	4.10795e-05	0.000529977	2.18049
10404452	Serpinb9d	serine (or cysteine) peptidase inhibitor, clade B, member 9d	ENSMUSG00000054266	-0.430921	4.00258	-2.85871	0.0147477	0.0408614	-3.83631
10552964	Ftl1	ferritin light chain 1	c("ENSMUSG00000050708", "ENSMUSG00000062382")	-0.430642	10.4625	-4.67355	0.000579742	0.00331732	-0.558772
10511416	Tox	thymocyte selection-associated high mobility group box	ENSMUSG00000041272	-0.430547	7.23236	-7.05668	1.53988e-05	0.000267954	3.19783
10467342	Gm9886	predicted gene 9886	NA	0.429578	7.82347	7.75739	6.11016e-06	0.00015308	4.15471
10573637	Phkb	phosphorylase kinase beta	ENSMUSG00000036879	0.428789	8.69124	8.16212	3.67757e-06	0.000111185	4.67919
10530059	Sel1l3	sel-1 suppressor of lin-12-like 3 (C. elegans)	ENSMUSG00000029189	-0.428131	10.5425	-9.41271	8.54515e-07	4.46009e-05	6.18037
10479510	9230112E08Rik	RIKEN cDNA 9230112E08 gene	NA	0.427606	7.80143	6.63994	2.74676e-05	0.000404269	2.59791
10474004	Gm9821	predicted gene 9821	NA	-0.427298	7.92778	-3.91401	0.00216613	0.0090214	-1.90976
10414581	AY358078	cDNA sequence AY358078	ENSMUSG00000050961	-0.427047	4.94254	-4.78863	0.000477838	0.00288083	-0.35957
10582310	Mvd	mevalonate (diphospho) decarboxylase	ENSMUSG00000006517	-0.426983	9.04644	-7.33935	1.05302e-05	0.000212375	3.5915
10608658	Ost4	oligosaccharyltransferase 4 homolog (S. cerevisiae)	ENSMUSG00000038803	-0.426433	11.6108	-5.78812	9.63423e-05	0.000961207	1.29664
10589886	4930520O04Rik	RIKEN cDNA 4930520O04 gene	ENSMUSG00000074039	0.426317	5.63275	2.90191	0.0136238	0.0384624	-3.75814
10520513	Slc35f6	solute carrier family 35, member F6	ENSMUSG00000029175	-0.426303	9.67772	-6.90681	1.89127e-05	0.000312184	2.98481
10398085	Glrx5	glutaredoxin 5 homolog (S. cerevisiae)	ENSMUSG00000021102	-0.425108	10.1612	-8.94128	1.45439e-06	6.14112e-05	5.63468
10572613	Mrpl34	mitochondrial ribosomal protein L34	ENSMUSG00000034880	-0.425056	10.1185	-6.00837	6.89847e-05	0.000762484	1.64292
10604656	Xlr	X-linked lymphocyte-regulated	ENSMUSG00000054626	-0.424947	7.71214	-4.04453	0.00171873	0.00759285	-1.67375
10396926	Srsf5	serine/arginine-rich splicing factor 5	ENSMUSG00000021134	0.424317	9.89771	6.88915	1.93801e-05	0.000316654	2.9595
10585467	Hykk	hydroxylysine kinase 1	ENSMUSG00000035878	0.424245	6.8664	6.65641	2.6835e-05	0.000398299	2.62207
10476314	Prnp	prion protein	ENSMUSG00000079037	-0.423363	10.2385	-6.19455	5.22892e-05	0.00063049	1.93026
10423358	2011-03-01	membrane-associated ring finger (C3HC4) 11	ENSMUSG00000022269	-0.423352	9.2704	-7.48652	8.6734e-06	0.000188772	3.79232
10593878	Snx33	sorting nexin 33	ENSMUSG00000032733	0.423196	7.05834	6.46515	3.52506e-05	0.000475946	2.3392
10382774	Ten1	TEN1 telomerase capping complex subunit	ENSMUSG00000020778	-0.423131	8.90064	-5.57952	0.000133021	0.0011753	0.962376
10527133	Wipi2	WD repeat domain, phosphoinositide interacting 2	ENSMUSG00000029578	-0.423063	9.60525	-11.0295	1.59931e-07	1.57637e-05	7.88679
10489045	Rpl37a	ribosomal protein L37a	ENSMUSG00000046330	-0.423021	11.8913	-8.04649	4.24367e-06	0.000121079	4.53138
10535623	Gm4871	predicted gene 4871	ENSMUSG00000061707	0.422934	4.79501	2.61171	0.0231804	0.0586877	-4.27889
10514466	Jun	jun proto-oncogene	ENSMUSG00000052684	-0.422446	9.8003	-7.28832	1.12698e-05	0.000222126	3.52121
10416090	Stmn4	stathmin-like 4	ENSMUSG00000022044	-0.422373	8.31317	-6.39473	3.90227e-05	0.000508828	2.23377
10455249	Arhgap26	Rho GTPase activating protein 26	ENSMUSG00000036452	0.422258	7.15973	5.90229	8.09575e-05	0.000849828	1.47699
10569393	R74862	expressed sequence R74862	ENSMUSG00000059277	-0.421728	7.38281	-7.12259	1.40805e-05	0.000252776	3.29057
10430956	Cyb5r3	cytochrome b5 reductase 3	ENSMUSG00000018042	-0.42138	11.8008	-8.59628	2.17619e-06	7.76403e-05	5.22011
10428690	Mrpl13	mitochondrial ribosomal protein L13	ENSMUSG00000022370	-0.420843	9.00721	-8.09614	3.98992e-06	0.000116535	4.59504
10375259	Gabrb2	gamma-aminobutyric acid (GABA) A receptor, subunit beta 2	ENSMUSG00000007653	0.420635	4.10881	4.58207	0.000676893	0.00372258	-0.718261
10447799	Igf2r	insulin-like growth factor 2 receptor	ENSMUSG00000023830	-0.420371	6.15859	-6.62506	2.80526e-05	0.000408611	2.57606
10448307	Tnfrsf12a	tumor necrosis factor receptor superfamily, member 12a	ENSMUSG00000023905	-0.419611	9.76922	-3.89974	0.00222184	0.00919231	-1.93563
10407387	Gm7120	predicted gene 7120	c("ENSMUSG00000074634", "ENSMUSG00000094114")	0.419483	9.82159	8.36266	2.87889e-06	9.38053e-05	4.93177
10476633	Pcsk2	proprotein convertase subtilisin/kexin type 2	ENSMUSG00000027419	0.418307	6.81307	6.50504	3.32877e-05	0.000458202	2.39862
10528877	Lmbr1	limb region 1	ENSMUSG00000010721	0.418147	6.7929	5.23343	0.000230277	0.00173423	0.39433
10410302	Zfp953	zinc finger protein 953	c("ENSMUSG00000098905", "ENSMUSG00000099122")	0.418147	7.2583	6.50422	3.33267e-05	0.000458202	2.3974
10556043	Nlrp14	NLR family, pyrin domain containing 14	ENSMUSG00000016626	0.41755	5.66993	3.12517	0.0090439	0.027843	-3.35167
10584500	Olfr963	olfactory receptor 963	ENSMUSG00000064110	0.417304	5.42554	3.65737	0.00343087	0.0128504	-2.37704
10402318	Prima1	proline rich membrane anchor 1	ENSMUSG00000041669	-0.416947	8.40208	-7.98021	4.6097e-06	0.000127065	4.44593
10550237	Napa	N-ethylmaleimide sensitive fusion protein attachment protein alpha	ENSMUSG00000006024	-0.416757	8.92465	-9.00513	1.35162e-06	5.92926e-05	5.70997
10438220	Car15	carbonic anhydrase 15	ENSMUSG00000090236	0.416581	7.34691	5.25701	0.000221707	0.00169345	0.433558
10542880	Mettl20	methyltransferase like 20	ENSMUSG00000039958	-0.416249	6.66527	-4.95347	0.000363413	0.00239458	-0.0771543
10538590	Herc6	hect domain and RLD 6	ENSMUSG00000029798	0.416025	6.51349	5.1254	0.000274254	0.00195568	0.213628
10488459	Zfp442	zinc finger protein 442	ENSMUSG00000068130	0.415475	7.61569	4.32161	0.00105847	0.00522242	-1.17757
10451551	Guca1a	guanylate cyclase activator 1a (retina)	ENSMUSG00000023982	-0.415403	7.58798	-5.62069	0.000124756	0.00112972	1.02882
10458589	Prelid2	PRELI domain containing 2	ENSMUSG00000056671	0.415391	7.54923	5.31782	0.000201124	0.00157027	0.534362
10468980	Fam107b	family with sequence similarity 107, member B	ENSMUSG00000026655	-0.414998	6.78645	-5.99893	6.99703e-05	0.000768592	1.62821
10587508	Ttk	Ttk protein kinase	ENSMUSG00000038379	0.414869	8.3499	6.72069	2.4511e-05	0.00037192	2.716
10606259	Mir325	microRNA 325	ENSMUSG00000065425	-0.414567	6.01072	-5.31859	0.000200876	0.00156942	0.53564
10592289	Ccdc15	coiled-coil domain containing 15	ENSMUSG00000034303	0.413861	7.15535	4.59374	0.000663605	0.00366739	-0.69786
10524647	Sppl3	signal peptide peptidase 3	ENSMUSG00000029550	-0.413748	9.22128	-10.2858	3.3658e-07	2.46403e-05	7.13184
10453461	Fbxo11	F-box protein 11	ENSMUSG00000005371	0.413426	9.62594	9.29206	9.77132e-07	4.78965e-05	6.04294
10571530	Fat1	FAT tumor suppressor homolog 1 (Drosophila)	ENSMUSG00000070047	0.413236	8.82566	7.63235	7.17493e-06	0.000166537	3.98858
10426751	Tmbim6	transmembrane BAX inhibitor motif containing 6	ENSMUSG00000023010	-0.413015	11.1145	-9.51275	7.65379e-07	4.25068e-05	6.29319
10411646	Gtf2h2	general transcription factor II H, polypeptide 2	ENSMUSG00000021639	0.413002	9.89189	5.74705	0.00010261	0.000998123	1.23132
10604111	Rhox1	reproductive homeobox 1	ENSMUSG00000071773	0.412677	9.13385	9.50377	7.72952e-07	4.25086e-05	6.28311
10366163	Slc6a15	solute carrier family 6 (neurotransmitter transporter), member 15	ENSMUSG00000019894	0.412615	10.1681	8.37727	2.82847e-06	9.31984e-05	4.94999
10586448	2810417H13Rik	RIKEN cDNA 2810417H13 gene	ENSMUSG00000040204	0.412583	8.92185	4.05595	0.00168443	0.00748237	-1.65316
10428012	Ropn1l	ropporin 1-like	ENSMUSG00000022236	-0.412444	6.40579	-7.43059	9.3341e-06	0.000197065	3.71634
10367600	Esr1	estrogen receptor 1 (alpha)	ENSMUSG00000019768	-0.412169	7.11167	-7.31085	1.09367e-05	0.000217461	3.55228
10578904	Cpe	carboxypeptidase E	ENSMUSG00000037852	0.41205	9.72418	7.65365	6.9804e-06	0.000163611	4.01701
10415319	Irf9	interferon regulatory factor 9	ENSMUSG00000002325	0.41144	7.85967	7.4693	8.87131e-06	0.000191233	3.76897
10377508	Trappc1	trafficking protein particle complex 1	ENSMUSG00000049299	-0.411301	10.1353	-8.01851	4.39424e-06	0.00012293	4.49537
10585097	Gm5617	predicted gene 5617	ENSMUSG00000042293	-0.410941	8.87276	-7.14934	1.35803e-05	0.000247053	3.32804
10399308	Fkbp1b	FK506 binding protein 1b	ENSMUSG00000020635	-0.410787	7.49733	-5.29881	0.000207333	0.00160651	0.502906
10557106	Hs3st2	heparan sulfate (glucosamine) 3-O-sulfotransferase 2	ENSMUSG00000046321	0.410635	8.23609	6.75033	2.35122e-05	0.000361512	2.75913
10589587	Setd2	SET domain containing 2	ENSMUSG00000044791	0.410364	9.10647	5.24816	0.000224884	0.00170625	0.418843
10572730	Zfp617	zinc finger protein 617	ENSMUSG00000066880	0.410122	7.68313	4.0916	0.00158185	0.00713921	-1.58896
10430783	Polr3h	polymerase (RNA) III (DNA directed) polypeptide H	ENSMUSG00000022476	-0.410114	7.79299	-9.32397	9.42961e-07	4.73202e-05	6.07944
10474229	Cd59a	CD59a antigen	ENSMUSG00000032679	-0.409969	8.01327	-3.34493	0.00604934	0.0202255	-2.94926
10367626	1700052N19Rik	RIKEN cDNA 1700052N19 gene	ENSMUSG00000061759	0.409637	8.08428	7.89473	5.13258e-06	0.000135833	4.33492
10520604	Emilin1	elastin microfibril interfacer 1	ENSMUSG00000029163	-0.409428	7.84555	-7.35372	1.03314e-05	0.000210627	3.61124
10419354	Map1lc3b	microtubule-associated protein 1 light chain 3 beta	ENSMUSG00000031812	-0.409018	10.9103	-8.46138	2.55604e-06	8.60204e-05	5.05438
10426603	9330020H09Rik	RIKEN cDNA 9330020H09 gene	NA	-0.408988	7.14096	-5.50875	0.000148614	0.00127606	0.847573
10475350	Serf2	small EDRK-rich factor 2	ENSMUSG00000074884	0.408787	9.13926	5.31058	0.000203464	0.00158382	0.522393
10524909	Nos1	nitric oxide synthase 1, neuronal	ENSMUSG00000029361	-0.408639	7.31323	-6.74862	2.35685e-05	0.000361512	2.75665
10555389	Ucp2	uncoupling protein 2 (mitochondrial, proton carrier)	ENSMUSG00000033685	-0.408458	9.91241	-6.57238	3.02337e-05	0.000428071	2.49841
10426479	Ano6	anoctamin 6	ENSMUSG00000064210	-0.408383	10.757	-8.80518	1.70256e-06	6.80661e-05	5.47271
10470412	Dbh	dopamine beta hydroxylase	ENSMUSG00000000889	0.408189	7.78583	5.60905	0.000127036	0.00114238	1.01006
10518494	Ptchd2	patched domain containing 2	ENSMUSG00000041544	-0.408102	8.12545	-8.53368	2.3443e-06	8.16136e-05	5.14347
10402096	Ttc7b	tetratricopeptide repeat domain 7B	ENSMUSG00000033530	-0.408051	10.0454	-9.69605	6.26951e-07	3.73981e-05	6.4973
10581538	Nqo1	NAD(P)H dehydrogenase, quinone 1	ENSMUSG00000003849	-0.4077	6.12426	-3.44557	0.00503565	0.0173934	-2.76476
10464551	Ndufs8	NADH dehydrogenase (ubiquinone) Fe-S protein 8	ENSMUSG00000059734	-0.407384	10.227	-7.71602	6.44245e-06	0.000157896	4.09995
10364712	Cirbp	cold inducible RNA binding protein	ENSMUSG00000045193	0.407158	9.48772	7.67542	6.78729e-06	0.000160696	4.04602
10370914	Abhd17a	abhydrolase domain containing 17A	ENSMUSG00000003346	-0.406919	8.50703	-8.62527	2.10273e-06	7.62331e-05	5.25547
10417167	Clybl	citrate lyase beta like	ENSMUSG00000025545	-0.40676	8.67029	-5.94896	7.54389e-05	0.000811544	1.55019
10597258	Tmie	transmembrane inner ear	ENSMUSG00000049555	-0.406616	6.91909	-5.94177	7.62621e-05	0.000818058	1.53893
10530560	Slain2	SLAIN motif family, member 2	ENSMUSG00000036087	-0.406259	6.50884	-3.54629	0.00419399	0.0150343	-2.58024
10349876	Plekha6	pleckstrin homology domain containing, family A member 6	ENSMUSG00000041757	-0.406232	9.74732	-8.88178	1.55773e-06	6.31721e-05	5.56412
10367282	Cnpy2	canopy 2 homolog (zebrafish)	ENSMUSG00000025381	-0.405532	9.00313	-7.62664	7.2281e-06	0.00016677	3.98094
10395273	Gdap10	ganglioside-induced differentiation-associated-protein 10	NA	0.405092	7.194	6.02385	6.7402e-05	0.000749633	1.66699
10589889	Glb1	galactosidase, beta 1	ENSMUSG00000045594	0.404947	10.0582	7.70142	6.56423e-06	0.000158731	4.08059
10561456	Med29	mediator complex subunit 29	ENSMUSG00000003444	-0.40483	8.74784	-7.19878	1.2705e-05	0.000236905	3.39706
10536949	Strip2	striatin interacting protein 2	ENSMUSG00000039629	0.404794	6.43008	5.1897	0.000247111	0.00181968	0.321368
10579089	Zfp866	zinc finger protein 866	ENSMUSG00000043090	0.404769	8.74838	7.73145	6.31629e-06	0.000156162	4.1204
10389795	Stxbp4	syntaxin binding protein 4	ENSMUSG00000020546	0.404551	8.85778	3.84387	0.00245468	0.00989571	-2.03708
10364916	Sppl2b	signal peptide peptidase like 2B	ENSMUSG00000035206	-0.404261	9.76875	-8.96652	1.4128e-06	6.05623e-05	5.66449
10564377	Lrrk1	leucine-rich repeat kinase 1	ENSMUSG00000015133	0.404065	7.80241	7.4466	9.13961e-06	0.000195151	3.73813
10373583	Gdf11	growth differentiation factor 11	ENSMUSG00000025352	-0.404046	8.87174	-6.35698	4.12197e-05	0.000529977	2.17696
10517731	Igsf21	immunoglobulin superfamily, member 21	ENSMUSG00000040972	-0.403984	7.41312	-4.10241	0.00155205	0.00702439	-1.56952
10382508	Ict1	immature colon carcinoma transcript 1	ENSMUSG00000018858	-0.403864	9.60357	-7.92474	4.94212e-06	0.000133615	4.37399
10532944	Mlec	malectin	ENSMUSG00000048578	-0.403673	9.30004	-8.89843	1.52803e-06	6.26204e-05	5.58391
10493009	Arhgef11	Rho guanine nucleotide exchange factor (GEF) 11	ENSMUSG00000041977	-0.403549	9.20598	-8.79614	1.72057e-06	6.8543e-05	5.46189
10568529	Ikzf5	IKAROS family zinc finger 5	ENSMUSG00000040167	0.403515	7.88834	4.89586	0.000399727	0.00255117	-0.175459
10431300	Alg12	asparagine-linked glycosylation 12 (alpha-1,6-mannosyltransferase)	ENSMUSG00000035845	-0.402966	9.7086	-5.82135	9.15667e-05	0.000927955	1.34934
10376796	Grap	GRB2-related adaptor protein	ENSMUSG00000004837	-0.402803	7.21704	-4.92415	0.000381445	0.00248148	-0.127143
10474123	Commd9	COMM domain containing 9	ENSMUSG00000027163	-0.402682	9.34198	-7.34623	1.04346e-05	0.000211582	3.60095
10354389	Slc39a10	solute carrier family 39 (zinc transporter), member 10	ENSMUSG00000025986	-0.402608	10.7904	-7.35643	1.02945e-05	0.000210253	3.61495
10514924	Tomm22	translocase of outer mitochondrial membrane 22 homolog (yeast)	ENSMUSG00000022427	-0.40221	9.82981	-5.49828	0.000151081	0.00128374	0.830519
10588192	Msl2	male-specific lethal 2 homolog (Drosophila)	ENSMUSG00000066415	0.401934	10.395	6.9504	1.78099e-05	0.000299239	3.04708
10497960	1700034I23Rik	FUN14 domain containing 2 pseudogene	ENSMUSG00000074619	-0.401686	6.39663	-2.65081	0.0215831	0.0553899	-4.20942
10480621	4933433C11Rik	RIKEN cDNA 4933433C11 gene	ENSMUSG00000036770	-0.401643	6.49728	-4.58539	0.000673081	0.00370704	-0.71245
10531437	Scarb2	scavenger receptor class B, member 2	ENSMUSG00000029426	-0.401259	9.97953	-8.89562	1.53302e-06	6.26204e-05	5.58056
10582941	Cwf19l2	CWF19-like 2, cell cycle control (S. pombe)	ENSMUSG00000025898	0.401182	7.734	4.68247	0.000571083	0.00328154	-0.543273
10424097	Med30	mediator complex subunit 30	ENSMUSG00000038622	-0.400815	8.26375	-5.578	0.000133337	0.00117717	0.959916
10539710	Tia1	cytotoxic granule-associated RNA binding protein 1	ENSMUSG00000071337	0.400654	9.75832	6.23153	4.95175e-05	0.000600926	1.98675
10520025	Psmc2	proteasome (prosome, macropain) 26S subunit, ATPase 2	ENSMUSG00000028932	0.400178	9.42248	6.44668	3.62007e-05	0.000485289	2.31162
10425283	Maff	v-maf musculoaponeurotic fibrosarcoma oncogene family, protein F (avian)	ENSMUSG00000042622	-0.400054	7.83144	-7.43734	9.25158e-06	0.000196677	3.72553
10558285	Zranb1	zinc finger, RAN-binding domain containing 1	ENSMUSG00000030967	0.399879	8.7239	5.88786	8.27487e-05	0.000862208	1.4543
10349049	Zfp706	zinc finger protein 706	ENSMUSG00000062397	-0.399638	11.2031	-5.81092	9.30388e-05	0.000937222	1.33281
10415980	Fbxo16	F-box protein 16	ENSMUSG00000034532	-0.39939	7.65281	-4.94625	0.000367769	0.00241763	-0.0894548
10489127	Rbl1	retinoblastoma-like 1 (p107)	ENSMUSG00000027641	0.399217	8.94706	6.7968	2.2033e-05	0.000347009	2.8265
10568399	Tial1	Tia1 cytotoxic granule-associated RNA binding protein-like 1	ENSMUSG00000030846	0.3991	9.47388	7.24914	1.18753e-05	0.000226534	3.46702
10585318	9830163H01Rik	RIKEN cDNA 9830163H01 gene	NA	0.398515	7.40556	5.1825	0.000250003	0.0018314	0.309339
10488465	Zfp345	zinc finger protein 345	ENSMUSG00000074731	0.398451	7.06728	3.29929	0.00657518	0.0215615	-3.03292
10581271	Zdhhc1	zinc finger, DHHC domain containing 1	ENSMUSG00000039199	0.398216	9.01463	6.15401	5.55191e-05	0.000654731	1.86811
10397083	Rbm25	RNA binding motif protein 25	ENSMUSG00000010608	0.398118	10.1321	3.67123	0.00334619	0.0126002	-2.35172
10397975	Ifi27	interferon, alpha-inducible protein 27	ENSMUSG00000064215	0.397518	9.74835	6.96512	1.74532e-05	0.000293682	3.06805
10583465	Ubl5	ubiquitin-like 5	ENSMUSG00000084786	-0.397411	9.87259	-7.53643	8.12596e-06	0.000179632	3.8598
10410947	Xrcc4	X-ray repair complementing defective repair in Chinese hamster cells 4	ENSMUSG00000021615	0.397313	8.88994	7.26957	1.15553e-05	0.000224051	3.4953
10587503	Sh3bgrl2	SH3 domain binding glutamic acid-rich protein like 2	ENSMUSG00000032261	0.397301	7.33554	5.08978	0.000290623	0.00204143	0.153712
10607259	Tro	trophinin	ENSMUSG00000025272	-0.397285	9.14166	-8.87193	1.57559e-06	6.36007e-05	5.5524
10494122	Rfx5	regulatory factor X, 5 (influences HLA class II expression)	ENSMUSG00000005774	0.397118	8.18676	6.88978	1.93632e-05	0.000316654	2.9604
10397575	Nrxn3	neurexin III	ENSMUSG00000066392	-0.396926	6.86106	-6.14404	5.63454e-05	0.00066145	1.85279
10606257	Mir384	microRNA 384	ENSMUSG00000065499	-0.39681	4.32097	-2.32921	0.0386844	0.0889694	-4.77173
10431266	Cerk	ceramide kinase	ENSMUSG00000035891	-0.396663	8.91256	-8.75598	1.80314e-06	7.06296e-05	5.41367
10596279	Dnajc13	DnaJ (Hsp40) homolog, subfamily C, member 13	ENSMUSG00000032560	0.396555	6.88366	3.04177	0.0105391	0.0314334	-3.50391
10531869	Mapk10	mitogen-activated protein kinase 10	ENSMUSG00000046709	-0.396409	10.3093	-8.01451	4.41623e-06	0.000123239	4.49022
10457071	Cyb5	cytochrome b-5	ENSMUSG00000024646	-0.396116	8.55443	-4.83359	0.000443299	0.0027355	-0.282202
10556583	Nucb2	nucleobindin 2	ENSMUSG00000030659	0.396077	9.31346	5.95988	7.4206e-05	0.000801225	1.56727
10491695	Bbs12	Bardet-Biedl syndrome 12 (human)	ENSMUSG00000051444	0.395646	6.74548	4.49488	0.000785401	0.00415125	-0.871172
10387699	Acap1	ArfGAP with coiled-coil, ankyrin repeat and PH domains 1	ENSMUSG00000001588	0.395542	7.32352	6.79474	2.20965e-05	0.000347009	2.82352
10494043	Tdrkh	tudor and KH domain containing protein	ENSMUSG00000041912	0.395413	9.05657	7.82882	5.57902e-06	0.000143931	4.24872
10587241	Hmgcll1	3-hydroxymethyl-3-methylglutaryl-Coenzyme A lyase-like 1	ENSMUSG00000007908	0.395059	8.45514	5.37526	0.000183525	0.0014695	0.629126
10356510	Iqca	IQ motif containing with AAA domain	ENSMUSG00000026301	-0.394998	5.78047	-2.53153	0.0268266	0.0661952	-4.42047
10427125	Igfbp6	insulin-like growth factor binding protein 6	ENSMUSG00000023046	-0.394965	8.4813	-5.74515	0.00010291	0.00100017	1.2283
10583264	Mre11a	meiotic recombination 11 homolog A (S. cerevisiae)	ENSMUSG00000031928	0.394952	8.57451	6.61584	2.84219e-05	0.000412924	2.56249
10436050	Dppa4	developmental pluripotency associated 4	ENSMUSG00000058550	0.394799	4.89609	2.64696	0.0217356	0.0557051	-4.21628
10424250	Snrpd2	small nuclear ribonucleoprotein D2	ENSMUSG00000040824	-0.394691	9.24028	-4.72702	0.000529821	0.00310619	-0.466011
10456046	Pdgfrb	platelet derived growth factor receptor, beta polypeptide	ENSMUSG00000024620	-0.394516	7.72267	-7.08127	1.48921e-05	0.000262492	3.2325
10525893	Aacs	acetoacetyl-CoA synthetase	ENSMUSG00000029482	-0.394344	8.86403	-7.17078	1.31931e-05	0.00024206	3.35801
10428736	Derl1	Der1-like domain family, member 1	ENSMUSG00000022365	-0.393861	11.1588	-7.7383	6.26119e-06	0.00015514	4.12946
10465388	Arl2	ADP-ribosylation factor-like 2	ENSMUSG00000024944	-0.393618	9.96084	-7.59578	7.52264e-06	0.000170302	3.93962
10585484	Chrna5	cholinergic receptor, nicotinic, alpha polypeptide 5	ENSMUSG00000035594	0.39256	6.49019	3.72687	0.00302731	0.0116009	-2.25015
10399505	Greb1	gene regulated by estrogen in breast cancer protein	ENSMUSG00000036523	-0.392498	6.46156	-6.77137	2.28299e-05	0.000354525	2.78966
10351179	Mettl18	methyltransferase like 18	ENSMUSG00000041396	0.392403	6.97354	6.18567	5.29794e-05	0.000635414	1.91667
10446136	Catsperd	catsper channel auxiliary subunit delta	ENSMUSG00000040828	0.392223	6.82543	6.65232	2.69907e-05	0.00039986	2.61607
10362102	Gm10825	predicted gene 10825	ENSMUSG00000096937	0.392142	6.83821	5.06319	0.000303516	0.00210494	0.108861
10570855	Plat	plasminogen activator, tissue	ENSMUSG00000031538	-0.391767	8.58262	-5.85534	8.69424e-05	0.000892457	1.40305
10365495	BC030307	cDNA sequence BC030307	ENSMUSG00000044937	0.391496	7.06849	6.29384	4.51939e-05	0.0005655	2.0815
10593413	2310030G06Rik	RIKEN cDNA 2310030G06 gene	ENSMUSG00000032062	0.391471	7.4747	4.39873	0.000926391	0.00469491	-1.04079
10415065	Lrp10	low-density lipoprotein receptor-related protein 10	ENSMUSG00000022175	-0.391328	9.42644	-7.1939	1.27887e-05	0.000237304	3.39026
10430693	Mkl1	MKL (megakaryoblastic leukemia)/myocardin-like 1	ENSMUSG00000042292	-0.391269	7.96691	-7.84125	5.49173e-06	0.000142004	4.26502
10432411	Mcrs1	microspherule protein 1	ENSMUSG00000037570	-0.391224	9.19514	-7.46095	8.96906e-06	0.000192561	3.75763
10456392	Cidea	cell death-inducing DNA fragmentation factor, alpha subunit-like effector A	ENSMUSG00000024526	-0.390757	5.31876	-4.81776	0.000455151	0.00279031	-0.309414
10556244	Snora23	small nucleolar RNA, H/ACA box 23	NA	0.390715	11.0506	4.848	0.000432795	0.00269819	-0.257466
10399584	G730007D18Rik	RIKEN cDNA G730007D18 gene	NA	0.390644	6.90361	4.39336	0.000935013	0.0047313	-1.0503
10364593	Cnn2	calponin 2	ENSMUSG00000004665	0.39035	9.03103	4.33196	0.00103966	0.00515217	-1.15918
10606714	Gla	galactosidase, alpha	ENSMUSG00000031266	-0.390217	8.78432	-6.39475	3.90218e-05	0.000508828	2.23379
10425611	Aco2	aconitase 2, mitochondrial	ENSMUSG00000022477	-0.38977	12.0678	-8.86974	1.57958e-06	6.36007e-05	5.5498
10604877	Mir465	microRNA 465	ENSMUSG00000070071	0.389719	5.87256	3.26662	0.00697985	0.0226253	-3.09279
10416956	Mir19b-1	microRNA 19b-1	ENSMUSG00000076256	0.389619	6.63478	4.58011	0.000679144	0.00372951	-0.721678
10392070	Strada	STE20-related kinase adaptor alpha	ENSMUSG00000069631	0.389437	9.85279	8.5411	2.32369e-06	8.16114e-05	5.15257
10409222	Shc3	src homology 2 domain-containing transforming protein C3	ENSMUSG00000021448	-0.388921	7.95914	-8.03358	4.31246e-06	0.000122157	4.51477
10351473	Sh2d1b2	SH2 domain protein 1B2	ENSMUSG00000073494	-0.388624	3.92906	-5.21707	0.000236429	0.00176173	0.367063
10524973	2410131K14Rik	RIKEN cDNA 2410131K14 gene	ENSMUSG00000032840	-0.388257	8.12526	-4.96225	0.000358193	0.00237298	-0.0622156
10568714	Mki67	antigen identified by monoclonal antibody Ki 67	ENSMUSG00000031004	0.38819	11.2749	7.20496	1.26e-05	0.000235576	3.40566
10427928	Trio	triple functional domain (PTPRF interacting)	ENSMUSG00000022263	-0.387891	9.06879	-9.50555	7.71443e-07	4.25086e-05	6.28511
10592140	Ddx25	DEAD (Asp-Glu-Ala-Asp) box polypeptide 25	ENSMUSG00000032101	0.38761	8.64564	6.87092	1.98756e-05	0.000322878	2.93333
10403352	Klf6	Kruppel-like factor 6	ENSMUSG00000000078	-0.387217	9.06303	-7.19799	1.27185e-05	0.000236905	3.39596
10396652	Hspa2	heat shock protein 2	ENSMUSG00000059970	-0.386983	7.67037	-4.60161	0.000654798	0.00362583	-0.684112
10403069	Ighm	immunoglobulin heavy constant mu	NA	-0.386796	4.41746	-2.56273	0.0253458	0.0632153	-4.36553
10408475	E2f3	E2F transcription factor 3	ENSMUSG00000016477	0.38668	8.14058	5.47609	0.000156451	0.00131213	0.794357
10464583	Gstp1	glutathione S-transferase, pi 1	c("ENSMUSG00000060803", "ENSMUSG00000097830")	-0.386138	11.4647	-6.00922	6.88975e-05	0.000762267	1.64423
10450374	D17H6S56E-5	DNA segment, Chr 17, human D6S56E 5	NA	0.385903	8.15836	4.31191	0.00107642	0.0052832	-1.19481
10389387	Ppm1d	protein phosphatase 1D magnesium-dependent, delta isoform	ENSMUSG00000020525	-0.385851	7.3196	-8.15844	3.69431e-06	0.000111313	4.67451
10527598	Pomp	proteasome maturation protein	ENSMUSG00000029649	-0.38579	8.79842	-3.80789	0.00261783	0.0103957	-2.10253
10600814	Gspt2	G1 to S phase transition 2	ENSMUSG00000071723	-0.385765	6.52051	-3.44098	0.00507786	0.0175231	-2.77317
10583228	Fam76b	family with sequence similarity 76, member B	ENSMUSG00000037808	0.385551	8.79129	8.02844	4.34017e-06	0.000122328	4.50816
10411915	Ppwd1	peptidylprolyl isomerase domain and WD repeat containing 1	ENSMUSG00000021713	0.385327	9.57816	6.79627	2.20493e-05	0.000347009	2.82574
10454286	Mapre2	microtubule-associated protein, RP/EB family, member 2	ENSMUSG00000024277	-0.385261	9.4375	-6.50455	3.3311e-05	0.000458202	2.39789
10366524	D630029K05Rik	RIKEN cDNA D630029K05 gene	ENSMUSG00000031294	0.385079	6.98368	3.4959	0.00459545	0.0161601	-2.67254
10538684	Tigd2	tigger transposable element derived 2	ENSMUSG00000049232	0.385064	8.38476	8.71343	1.89531e-06	7.31366e-05	5.36237
10387791	Slc16a13	solute carrier family 16 (monocarboxylic acid transporters), member 13	ENSMUSG00000044367	-0.384711	8.14021	-9.08405	1.23526e-06	5.60993e-05	5.80242
10375313	Ccnjl	cyclin J-like	ENSMUSG00000044707	-0.384487	8.09707	-4.96587	0.000356064	0.00236272	-0.0560621
10572727	Zfp882	zinc finger protein 882	ENSMUSG00000089857	0.384374	8.08848	5.85195	8.73928e-05	0.000895599	1.3977
10416952	Mir19a	microRNA 19a	ENSMUSG00000065416	0.384307	6.38515	3.74115	0.00295063	0.0113806	-2.22411
10572605	Ankle1	ankyrin repeat and LEM domain containing 1	ENSMUSG00000046295	0.384198	7.75168	6.98871	1.68974e-05	0.000287766	3.10159
10428579	Ext1	exostoses (multiple) 1	ENSMUSG00000061731	-0.384097	9.42217	-6.64365	2.73239e-05	0.000403206	2.60335
10440406	Nrip1	nuclear receptor interacting protein 1	ENSMUSG00000048490	-0.384066	8.47184	-7.12427	1.40483e-05	0.000252657	3.29294
10384603	Mdh1	malate dehydrogenase 1, NAD (soluble)	ENSMUSG00000020321	-0.383986	10.7171	-8.29818	3.11324e-06	9.94109e-05	4.85107
10364375	Cstb	cystatin B	ENSMUSG00000005054	-0.383948	10.6951	-8.78349	1.74613e-06	6.91057e-05	5.44672
10492169	Mab21l1	mab-21-like 1 (C. elegans)	ENSMUSG00000056947	-0.383916	6.3357	-3.90354	0.00220686	0.00914713	-1.92874
10595189	Slc17a5	solute carrier family 17 (anion/sugar transporter), member 5	ENSMUSG00000049624	0.383689	9.71815	5.25623	0.000221986	0.00169402	0.432257
10588547	Vprbp	Vpr (HIV-1) binding protein	ENSMUSG00000040325	0.383484	10.1208	9.97414	4.65849e-07	3.10659e-05	6.80064
10424743	Tigd5	tigger transposable element derived 5	NA	-0.383333	7.53755	-5.85568	8.68973e-05	0.000892457	1.40359
10399588	Zfp125	zinc finger protein 125	NA	0.383108	6.47373	3.25035	0.00719062	0.0231952	-3.12258
10450069	H2-K2	histocompatibility 2, K region locus 2	NA	0.382783	7.11945	3.82125	0.00255597	0.0102148	-2.07821
10591763	Zfp810	zinc finger protein 810	ENSMUSG00000066829	0.382777	7.98153	6.37004	4.04449e-05	0.00052411	2.19664
10432032	Vdr	vitamin D receptor	ENSMUSG00000022479	0.382609	7.85453	6.81746	2.14077e-05	0.000340891	2.85635
10410560	Trip13	thyroid hormone receptor interactor 13	ENSMUSG00000021569	0.382508	9.20405	7.26518	1.16232e-05	0.000224367	3.48923
10493820	S100a6	S100 calcium binding protein A6 (calcyclin)	ENSMUSG00000001025	0.382431	8.64317	4.68443	0.0005692	0.0032767	-0.539872
10491721	Spry1	sprouty homolog 1 (Drosophila)	ENSMUSG00000037211	-0.382324	8.33312	-5.56701	0.000135647	0.00119382	0.942123
10413810	D830044D21Rik	RIKEN cDNA D830044D21 gene	NA	0.381918	6.77895	5.54516	0.000140363	0.00122576	0.906728
10390080	Tmem92	transmembrane protein 92	ENSMUSG00000075610	0.381903	4.34325	2.60855	0.0233143	0.0589735	-4.28448
10447417	Msh6	mutS homolog 6 (E. coli)	ENSMUSG00000005370	0.381792	7.53283	5.0348	0.000317944	0.002187	0.0608828
10455139	Pcdhb22	protocadherin beta 22	ENSMUSG00000073591	0.381669	6.78403	5.68164	0.000113502	0.00106902	1.12678
10569181	Lrdd	leucine-rich and death domain containing	ENSMUSG00000025507	0.381609	8.04949	6.77612	2.26787e-05	0.000353018	2.79656
10380815	Psmb3	proteasome (prosome, macropain) subunit, beta type 3	ENSMUSG00000069744	-0.381594	12.5971	-8.73955	1.83816e-06	7.16074e-05	5.39388
10506274	Dnajc6	DnaJ (Hsp40) homolog, subfamily C, member 6	ENSMUSG00000028528	-0.381448	6.83511	-5.60791	0.000127262	0.00114245	1.00822
10404218	Gpld1	glycosylphosphatidylinositol specific phospholipase D1	ENSMUSG00000021340	-0.381202	6.36296	-4.10008	0.00155843	0.00704765	-1.57372
10568956	Olfr60	olfactory receptor 60	ENSMUSG00000060112	-0.381128	4.98412	-2.59984	0.023688	0.0597538	-4.29992
10572485	Rab3a	RAB3A, member RAS oncogene family	ENSMUSG00000031840	-0.380926	7.88815	-6.29773	4.49376e-05	0.000563544	2.0874
10373672	Olfr825	olfactory receptor 825	ENSMUSG00000058084	0.380793	4.62682	3.48438	0.00469258	0.0164549	-2.69364
10606792	Nxf7	nuclear RNA export factor 7	ENSMUSG00000031410	-0.380667	9.98774	-6.35117	4.15693e-05	0.000533166	2.1682
10588505	Abhd14b	abhydrolase domain containing 14b	ENSMUSG00000042073	0.380614	7.0372	5.51401	0.000147392	0.00127036	0.85612
10477725	Mmp24	matrix metallopeptidase 24	ENSMUSG00000027612	-0.380476	7.51063	-6.59409	2.93137e-05	0.00041921	2.53046
10412298	Itga1	integrin alpha 1	ENSMUSG00000042284	-0.380072	10.55	-7.85839	5.37374e-06	0.000139594	4.28747
10527732	Fry	furry homolog (Drosophila)	ENSMUSG00000056602	-0.380063	9.02101	-8.92218	1.48673e-06	6.16229e-05	5.61207
10412421	Zfp131	zinc finger protein 131	ENSMUSG00000094870	0.379717	9.42341	7.15945	1.33963e-05	0.000244384	3.34218
10598524	Ssxb10	synovial sarcoma, X member B, breakpoint 10	ENSMUSG00000068219	0.379231	5.90626	3.17454	0.00826129	0.0259148	-3.26137
10468016	Ndufb8	NADH dehydrogenase (ubiquinone) 1 beta subcomplex 8	ENSMUSG00000025204	-0.37898	9.89268	-5.77063	9.896e-05	0.000978904	1.26886
10598138	Spry3	sprouty homolog 3 (Drosophila)	ENSMUSG00000061654	-0.378611	8.1874	-6.81313	2.15372e-05	0.000342469	2.8501
