# Supplementary material for: The long non-coding RNA Dali is an epigenetic regulator of neural differentiation
Source: eLife journal article supplement (doi:10.7554/elife.04530), 2014-11-21
Supplement: supp [file elife-04530-supp-v1.zip › elife_poa_e04530_Supplementary_File_5.xlsx]

## Sheet: DALI_lacZ_input
chr1	9531349	9531664	0	14.84
chr1	16094821	16095132	1	11.49
chr1	19972946	19973588	2	14.92
chr1	21004661	21004998	3	13.6
chr1	23833808	23834797	4	13.19
chr1	24058336	24058985	5	18.24
chr1	34117462	34118246	6	25.43
chr1	34160554	34160998	7	11.92
chr1	36568231	36568909	8	23.43
chr1	37276899	37277400	9	73.85
chr1	39081836	39082659	10	13.26
chr1	42299077	42299941	11	14.45
chr1	44175438	44176287	12	15.06
chr1	51144665	51145084	13	20.44
chr1	51400925	51401360	14	18.1
chr1	53011887	53012324	15	13.67
chr1	62595217	62595933	16	18.09
chr1	62749245	62749659	17	25.4
chr1	62998024	62998386	18	9.04
chr1	64087378	64088332	19	20.32
chr1	64112965	64113801	20	16.17
chr1	64269693	64271110	21	15.74
chr1	65224720	65225379	22	16.48
chr1	71995823	71996400	23	16
chr1	72229628	72230067	24	18.13
chr1	72282936	72283272	25	10.35
chr1	72301997	72302435	26	10.34
chr1	72624134	72624531	27	22.95
chr1	72757677	72757933	28	34.08
chr1	74286816	74287415	29	24.77
chr1	74320732	74322014	30	12.25
chr1	74854770	74855266	31	15.56
chr1	75138924	75139364	32	16.92
chr1	78334509	78335304	33	21.86
chr1	79446683	79448218	34	11.35
chr1	79455498	79455993	35	15.06
chr1	82164736	82165560	36	25.06
chr1	88285870	88286192	37	15.72
chr1	88336261	88338548	38	16.53
chr1	90174632	90175205	39	18.88
chr1	91434880	91435620	40	16.99
chr1	94641418	94642114	41	16.73
chr1	94668895	94669525	42	11.1
chr1	99666256	99667117	43	17.52
chr1	130255533	130256415	44	12.94
chr1	130699847	130700603	45	11.99
chr1	133806382	133807206	46	47.06
chr1	134921438	134922123	47	30.54
chr1	135074086	135074496	48	23.2
chr1	135123434	135124145	49	20.23
chr1	135134340	135134712	50	16.87
chr1	145830210	145830595	51	12.48
chr1	152240006	152240788	52	17.19
chr1	153553114	153553550	53	23.82
chr1	154751522	154752207	54	21.69
chr1	154931470	154931840	55	16.68
chr1	155727567	155727996	56	21
chr1	156946386	156947268	57	26.07
chr1	157517832	157518345	58	32.65
chr1	158147602	158148422	59	30.96
chr1	158602656	158603155	60	16.68
chr1	159842278	159843296	61	33.95
chr1	160253516	160254076	62	9.68
chr1	163110569	163111148	63	31.39
chr1	163678215	163678853	64	37.16
chr1	164147565	164148092	65	16.54
chr1	165828528	165829018	66	35.87
chr1	166916097	166916749	67	38.72
chr1	166948908	166949409	68	12.57
chr1	166976701	166977989	69	40.65
chr1	167569500	167570273	70	18.12
chr1	167573126	167573442	71	14.16
chr1	167583699	167584189	72	33.16
chr1	167585017	167586144	73	23.07
chr1	168877660	168878592	74	51.33
chr1	169236671	169236951	75	18.39
chr1	171388963	171389929	76	34.07
chr1	171746463	171747790	77	17.39
chr1	171848149	171848459	78	20.74
chr1	171898974	171899790	79	28.05
chr1	172831750	172832163	80	41.65
chr1	173180269	173180785	81	31.36
chr1	173291347	173291796	82	23.83
chr1	174450738	174451655	83	10.16
chr1	174455398	174455862	84	22.91
chr1	175320045	175320612	85	9.4
chr1	176525249	176525542	86	12.78
chr1	177515515	177515896	87	10.92
chr1	178685368	178686540	88	11.31
chr1	178730910	178731448	89	60.71
chr1	178807937	178808319	90	65.38
chr1	179251876	179252590	91	25.98
chr1	179273373	179273692	92	25.12
chr1	180335602	180335855	93	7.93
chr1	181447911	181448282	94	49.49
chr1	181777594	181778216	95	17.55
chr1	182803882	182804517	96	14.1
chr1	183080650	183081256	97	46.42
chr1	184349589	184350422	98	27.43
chr1	184913276	184913995	99	39.8
chr1	186305922	186306415	100	25
chr1	186467472	186469588	101	20.36
chr1	188047175	188048236	102	17.29
chr1	189039004	189039470	103	22.53
chr1	193662992	193663899	104	30.35
chr1	193720703	193721707	105	15.25
chr1	193916808	193917195	106	19.86
chr1	194622373	194623247	107	29.62
chr1	194661138	194661537	108	19.08
chr10	6931325	6931651	109	17.37
chr10	7301808	7303266	110	12.82
chr10	7445328	7446180	111	36.88
chr10	7529709	7530067	112	11.48
chr10	8515199	8515529	113	9.9
chr10	8732692	8733066	114	11.26
chr10	9277309	9277957	115	23.69
chr10	11082040	11082553	116	14.23
chr10	12587752	12588138	117	13.51
chr10	16356898	16357459	118	24.11
chr10	16754701	16755171	119	14.59
chr10	17282655	17283024	120	11.32
chr10	21554676	21555091	121	33.76
chr10	22466067	22467033	122	33.69
chr10	24938975	24939352	123	17.51
chr10	34036458	34037431	124	35.06
chr10	36858693	36859237	125	15.64
chr10	39271622	39272583	126	13.74
chr10	39290698	39291178	127	17.31
chr10	40470690	40471504	128	21.54
chr10	40602866	40603548	129	11.52
chr10	41654481	41655202	130	30.71
chr10	41919293	41919675	131	37.13
chr10	42724011	42724591	132	37.82
chr10	45418797	45419103	133	17.66
chr10	53181209	53181652	134	14.04
chr10	55948291	55949105	135	32
chr10	59406265	59406851	136	34.02
chr10	59415241	59416175	137	20.68
chr10	59465460	59466545	138	22.86
chr10	60347849	60349092	139	23.19
chr10	62005757	62006797	140	15.63
chr10	66648249	66649164	141	22.2
chr10	66774232	66774741	142	18.63
chr10	67240881	67241883	143	18.97
chr10	67598970	67599750	144	16.01
chr10	69321502	69322198	145	11.35
chr10	69557561	69558680	146	9.73
chr10	70942754	70943069	147	21.56
chr10	74799227	74799753	148	21.56
chr10	75335396	75336196	149	28.66
chr10	76484102	76484580	150	12.48
chr10	77490483	77491558	151	63.13
chr10	77622650	77623116	152	33.68
chr10	77800851	77801345	153	25.92
chr10	78036538	78038250	154	19.68
chr10	79502531	79503190	155	14.55
chr10	79533604	79534231	156	15.29
chr10	80288842	80289734	157	22.52
chr10	80839658	80840169	158	9.85
chr10	81111539	81111839	159	15.07
chr10	82159359	82160346	160	15.25
chr10	82822612	82823187	161	35.7
chr10	83115075	83115688	162	9.34
chr10	85954636	85955110	163	25.97
chr10	87767007	87767360	164	25.65
chr10	93766241	93767646	165	88.66
chr10	95356759	95357989	166	12.63
chr10	96808055	96808473	167	30.84
chr10	102604246	102604476	168	9.11
chr10	106910576	106910974	169	19.07
chr10	113221380	113221778	170	13.17
chr10	114608503	114609335	171	23.29
chr10	115704560	115705397	172	11.3
chr10	117384469	117385337	173	17.45
chr10	117686061	117686649	174	31.49
chr10	119160605	119161195	175	25
chr10	120138873	120139294	176	62.8
chr10	121533990	121534979	177	36.64
chr10	122320558	122321994	178	26.86
chr10	126559726	126560151	179	25.71
chr10	126727396	126728146	180	32.83
chr10	126857707	126859328	181	10.35
chr10	127623027	127623347	182	36.85
chr10	127648483	127649029	183	13.26
chr10	127669451	127670306	184	31.41
chr10	127984303	127985596	185	14.11
chr10	128133035	128133909	186	8.72
chr10	129978573	129979597	187	18.16
chr11	3047484	3047807	188	18.57
chr11	4853727	4854332	189	12.07
chr11	6379816	6380505	190	25.54
chr11	11354954	11355317	191	7.18
chr11	11708679	11709395	192	16.07
chr11	11873326	11873666	193	16.68
chr11	16851047	16851833	194	24.6
chr11	17132539	17133281	195	33.19
chr11	19878995	19879940	196	31.83
chr11	20345304	20346366	197	24.43
chr11	20932729	20933463	198	9.05
chr11	29715346	29715808	199	8.09
chr11	29785206	29785580	200	20.39
chr11	31840801	31841873	201	28.38
chr11	31927493	31928196	202	26.77
chr11	32040882	32042225	203	18.49
chr11	33070289	33070821	204	14.89
chr11	34049342	34049673	205	11.63
chr11	34646950	34647335	206	39.03
chr11	35318987	35319873	207	41.46
chr11	35409491	35409902	208	9.95
chr11	35415199	35415770	209	39.21
chr11	43019537	43020719	210	12.77
chr11	43382757	43383954	211	15.34
chr11	43447655	43447942	212	8.87
chr11	43455816	43457144	213	16.4
chr11	44238718	44239353	214	12.73
chr11	50182841	50183596	215	12.21
chr11	50641166	50641513	216	10.56
chr11	51367830	51368369	217	9.63
chr11	51687636	51688264	218	17.86
chr11	51780820	51781777	219	26.9
chr11	53321783	53322465	220	10.29
chr11	53572456	53573595	221	16.79
chr11	55021418	55022042	222	21.93
chr11	55237329	55238007	223	17.89
chr11	55332270	55332991	224	14.08
chr11	57614364	57615118	225	19.18
chr11	57775518	57776315	226	12.36
chr11	58115908	58116546	227	14.49
chr11	60350357	60351330	228	39.08
chr11	62939346	62939855	229	14.65
chr11	63231701	63233795	230	39.85
chr11	68761027	68761504	231	15.71
chr11	68855133	68855431	232	28.3
chr11	76141314	76142755	233	15.5
chr11	76457610	76459775	234	16.61
chr11	78136466	78136876	235	23.49
chr11	79107323	79107867	236	7.79
chr11	80191303	80191938	237	10.01
chr11	83256306	83256831	238	18.7
chr11	84729643	84730203	239	50.45
chr11	85574709	85575279	240	12.55
chr11	85631820	85632167	241	13.54
chr11	86922163	86923034	242	38.4
chr11	94290290	94291247	243	11.05
chr11	96436493	96436873	244	17.71
chr11	96838930	96839657	245	33.59
chr11	98233772	98234042	246	12.13
chr11	98543357	98543965	247	28.47
chr11	98592289	98592913	248	14.55
chr11	98720247	98720685	249	24.4
chr11	98768923	98769527	250	15.86
chr11	98993277	98994087	251	28.06
chr11	100379142	100379992	252	15.25
chr11	101140148	101140726	253	32.22
chr11	101963490	101964023	254	11.52
chr11	102244617	102245670	255	25.28
chr11	102273013	102273321	256	31.51
chr11	102864463	102865056	257	12.53
chr11	102889395	102890487	258	19.11
chr11	102977345	102978081	259	33.97
chr11	103030924	103031781	260	10.2
chr11	103243056	103244382	261	18.33
chr11	103651077	103651930	262	17.63
chr11	103827508	103828407	263	47.28
chr11	103979570	103979983	264	21.54
chr11	104056877	104057524	265	19.32
chr11	104330739	104331518	266	18.29
chr11	104981720	104982537	267	28.19
chr11	105874759	105875443	268	11.45
chr11	106077582	106078533	269	21.54
chr11	106433222	106433951	270	26.54
chr11	109473070	109474043	271	17.2
chr11	109497180	109497882	272	26.22
chr11	112642810	112643587	273	21.43
chr11	113159033	113159624	274	84.31
chr11	113213257	113214685	275	14.73
chr11	113254743	113255713	276	10.86
chr11	115675019	115676223	277	13.79
chr11	115885441	115886044	278	37.44
chr11	116028680	116029786	279	30.86
chr11	116532450	116533279	280	31.95
chr11	116674044	116674583	281	19.31
chr11	116918108	116918550	282	30.53
chr11	116921257	116922082	283	18.46
chr11	117315168	117316402	284	13.37
chr11	117382849	117384891	285	22.86
chr11	117743648	117744234	286	9.83
chr11	117801093	117801798	287	10.55
chr11	117963972	117964505	288	20.78
chr11	118074074	118074505	289	13.9
chr11	118151448	118152131	290	14.26
chr11	118240906	118241432	291	15
chr11	118858431	118858817	292	12.33
chr11	119678259	119679121	293	13.02
chr11	119850278	119851092	294	20.03
chr11	120109329	120110005	295	39.82
chr11	120218868	120219680	296	18.39
chr11	120865717	120866173	297	9
chr11	121312764	121313431	298	41.34
chr12	3887897	3888235	299	27.06
chr12	5357203	5358234	300	28.83
chr12	8527830	8528564	301	17.43
chr12	12629700	12630211	302	14.07
chr12	16847574	16848139	303	19.35
chr12	25336443	25337241	304	13.73
chr12	29489840	29490496	305	34.38
chr12	29768302	29769177	306	16.68
chr12	29901835	29902182	307	7.99
chr12	29975637	29976554	308	29.7
chr12	30619642	30620254	309	22.34
chr12	40743547	40744027	310	11.58
chr12	41064694	41065286	311	80.84
chr12	42124632	42125331	312	50.53
chr12	43378477	43378896	313	24.61
chr12	55009575	55010270	314	13.55
chr12	56539326	56540165	315	24.47
chr12	56599848	56600489	316	58.94
chr12	72116419	72117157	317	14.71
chr12	72956470	72957630	318	17.95
chr12	79200804	79201266	319	25.77
chr12	81141231	81141955	320	24.07
chr12	81247357	81248756	321	22.66
chr12	82907592	82908842	322	19.61
chr12	85262765	85263670	323	28.32
chr12	85516654	85517332	324	14.38
chr12	85702345	85703368	325	33.11
chr12	85886844	85887360	326	11.55
chr12	86125422	86125900	327	18.34
chr12	87165292	87166237	328	32.82
chr12	88127673	88128825	329	20.2
chr12	88136340	88137217	330	40.44
chr12	88177526	88177992	331	12.04
chr12	88252286	88253019	332	35.94
chr12	88606983	88608318	333	23.22
chr12	88812821	88813536	334	27.67
chr12	92651307	92651740	335	12.7
chr12	92923494	92923959	336	13.46
chr12	100211310	100212161	337	10.93
chr12	100232695	100233253	338	31.83
chr12	100631633	100632223	339	13.29
chr12	100802492	100802894	340	15.68
chr12	104584487	104585156	341	19.53
chr12	106202767	106203835	342	15.77
chr12	106257622	106258247	343	10.73
chr12	109785498	109785979	344	11.88
chr12	110141135	110141565	345	22.35
chr12	110612301	110613139	346	22.17
chr13	9190144	9191214	347	35.91
chr13	11655643	11656282	348	13.2
chr13	14131510	14132154	349	31.66
chr13	21325805	21326516	350	17.96
chr13	21825920	21826870	351	55.57
chr13	22010779	22011380	352	23.43
chr13	22120437	22121107	353	20.73
chr13	32404608	32404880	354	14.76
chr13	34222782	34224126	355	39.38
chr13	43870208	43870749	356	9.16
chr13	43959680	43960766	357	10.41
chr13	44934924	44935554	358	34.39
chr13	45097669	45098070	359	11.78
chr13	45179144	45179481	360	13.19
chr13	55506727	55507381	361	12.91
chr13	55694210	55694596	362	43.64
chr13	55999123	55999531	363	20.52
chr13	56683045	56683779	364	12.69
chr13	60387957	60388782	365	15.14
chr13	60510749	60512027	366	15.6
chr13	60927417	60927734	367	17.02
chr13	60998641	60999375	368	12.89
chr13	63433911	63434272	369	26.05
chr13	63531565	63532643	370	15.29
chr13	67209470	67210335	371	15.22
chr13	67295283	67295955	372	39.73
chr13	69750393	69751000	373	31.7
chr13	81796317	81797082	374	32.44
chr13	90151787	90152186	375	9.9
chr13	91107191	91107447	376	21.09
chr13	91451016	91451387	377	14.64
chr13	91600618	91600930	378	21.08
chr13	92055472	92056507	379	25.55
chr13	95745962	95746380	380	26.97
chr13	96362341	96362917	381	15.9
chr13	96902808	96904262	382	10.04
chr13	97475963	97476235	383	19.93
chr13	97741569	97742230	384	46.66
chr13	98008431	98009975	385	21.07
chr13	98708672	98709250	386	29.08
chr13	98831853	98833254	387	17.41
chr13	99087222	99087693	388	16.47
chr13	99637844	99638115	389	21.13
chr13	99863036	99863932	390	40.68
chr13	99868822	99869767	391	16.87
chr13	100114197	100114957	392	13.31
chr13	100145514	100146017	393	17.71
chr13	100154754	100155365	394	28.02
chr13	100183849	100184924	395	24.98
chr13	100222180	100222994	396	27.63
chr13	100324968	100325540	397	20.03
chr13	100364244	100364661	398	17.35
chr13	100417584	100418253	399	28.48
chr13	100466074	100467516	400	21.62
chr13	100524172	100524672	401	31.83
chr13	100607678	100608297	402	46.63
chr13	100877663	100878289	403	17.05
chr13	101615610	101616821	404	25.6
chr13	101617026	101617651	405	42.9
chr13	101720205	101720973	406	20.18
chr13	102428750	102429324	407	19.9
chr13	102581680	102582314	408	17.97
chr13	104768065	104769106	409	24.62
chr13	105579797	105580114	410	21.37
chr13	109087551	109088692	411	41.46
chr13	110697767	110698237	412	26.19
chr13	110852097	110853729	413	12.74
chr13	113545150	113545450	414	20.96
chr13	113717341	113718043	415	10.25
chr13	115128529	115128984	416	14.19
chr13	116217450	116218158	417	11.93
chr13	116477688	116478252	418	33.28
chr13	116877856	116878458	419	9.81
chr13	117813972	117814376	420	21.18
chr13	118024250	118024793	421	42.37
chr14	8680338	8680578	422	15.44
chr14	10225771	10226295	423	20.72
chr14	10282409	10283290	424	22.21
chr14	20795894	20796918	425	30.86
chr14	21365729	21366081	426	28.71
chr14	21492032	21492834	427	14.26
chr14	21711003	21711920	428	23.15
chr14	22258881	22259895	429	26.69
chr14	23865710	23866222	430	16.36
chr14	24879003	24879273	431	11.23
chr14	25765232	25765545	432	18.01
chr14	26005796	26006458	433	13.97
chr14	26085819	26086482	434	13.7
chr14	26338966	26339644	435	26.73
chr14	27976426	27976824	436	11.63
chr14	32616980	32617357	437	10.1
chr14	47801127	47801821	438	16.85
chr14	48037664	48038106	439	19.22
chr14	54865990	54866636	440	24.19
chr14	55704063	55705320	441	40.86
chr14	55767229	55768324	442	36.27
chr14	56254284	56254711	443	20.91
chr14	63498373	63498690	444	12.96
chr14	63673523	63674169	445	25.46
chr14	63680960	63681419	446	29.2
chr14	63996755	63997146	447	18.35
chr14	65885001	65885596	448	18.59
chr14	66381126	66381725	449	9.45
chr14	70949065	70949579	450	27.8
chr14	71243196	71244074	451	31.38
chr14	71580606	71581106	452	14.57
chr14	73138002	73138471	453	35.31
chr15	3975897	3976726	454	21.86
chr15	4324469	4325687	455	16.43
chr15	5019144	5019533	456	7.82
chr15	9066075	9066495	457	14.13
chr15	26448826	26449478	458	28.79
chr15	26647570	26648125	459	9.75
chr15	34724609	34725586	460	14.76
chr15	38099316	38099842	461	33.78
chr15	38177429	38178004	462	18.45
chr15	38204603	38205574	463	34.48
chr15	41443689	41444124	464	24.12
chr15	50497981	50498601	465	12.47
chr15	50529381	50530035	466	16.58
chr15	51730552	51731429	467	15.81
chr15	52960123	52960601	468	19.63
chr15	52988859	52989271	469	14.67
chr15	57801798	57802083	470	7.11
chr15	57865704	57866014	471	36.33
chr15	58335607	58336006	472	16.94
chr15	58348594	58349411	473	16.86
chr15	59112281	59113296	474	13.83
chr15	59170051	59170655	475	16.18
chr15	62053807	62056589	476	21.3
chr15	63484018	63484506	477	15.93
chr15	64458883	64459372	478	12.52
chr15	71936533	71937152	479	28.68
chr15	73017247	73017690	480	18.4
chr15	73300536	73300989	481	21.63
chr15	73476277	73476686	482	27.22
chr15	76089987	76091085	483	29.85
chr15	76094747	76095236	484	17.96
chr15	76498499	76498846	485	17.4
chr15	76575662	76576022	486	13.93
chr15	76834233	76834731	487	15.22
chr15	76859777	76860292	488	25.18
chr15	77166634	77167862	489	30.31
chr15	77686594	77687641	490	17.52
chr15	77759343	77759891	491	29.41
chr15	77763786	77764590	492	11.88
chr15	78087159	78088342	493	25.41
chr15	78267232	78267995	494	27.77
chr15	78344964	78345493	495	39.14
chr15	78362475	78363055	496	23.36
chr15	78385314	78385724	497	17.97
chr15	78512261	78512787	498	18.2
chr15	78665413	78666205	499	18.71
chr15	78666606	78667262	500	18.97
chr15	78765058	78765768	501	17.51
chr15	79032662	79033291	502	8.07
chr15	79157656	79158997	503	38.6
chr15	79801452	79801752	504	15.72
chr15	79929100	79930326	505	13.35
chr15	80049485	80050211	506	26.79
chr15	80536459	80537320	507	14.81
chr15	80628815	80629202	508	27.24
chr15	81131371	81132706	509	15.53
chr15	81494036	81494783	510	21.94
chr15	81560169	81560717	511	16.39
chr15	81641416	81641874	512	12.21
chr15	81661677	81662330	513	15.47
chr15	81688566	81689366	514	31.31
chr15	82176358	82177038	515	69.42
chr15	83039536	83040005	516	8.48
chr15	83082350	83083161	517	22.62
chr15	83107766	83109021	518	39.66
chr15	83496657	83497310	519	12.55
chr15	84443942	84445115	520	12.66
chr15	85430069	85431029	521	13.15
chr15	85441040	85441896	522	28.8
chr15	86308840	86310079	523	24.22
chr15	93228714	93229173	524	13.88
chr15	95704697	95705381	525	27.21
chr15	96295289	96295925	526	29.02
chr15	96306889	96307288	527	21.63
chr15	96373470	96374293	528	18.91
chr15	97984472	97984907	529	24.79
chr15	98759014	98759386	530	25.84
chr15	98807994	98809095	531	27.07
chr15	98904548	98905439	532	16.07
chr15	99230082	99230518	533	14.46
chr15	99445547	99446250	534	12.03
chr15	99518946	99519572	535	16.36
chr15	100584584	100585674	536	40.32
chr15	100587543	100588786	537	36.38
chr15	100935772	100936791	538	25.71
chr15	101814065	101815732	539	57.41
chr15	102998064	102998761	540	14.96
chr16	4678579	4679918	541	13.86
chr16	11254156	11254956	542	13.09
chr16	13197273	13197978	543	13.73
chr16	13371836	13372365	544	36.66
chr16	13436985	13437803	545	16.55
chr16	14317247	14318022	546	24.13
chr16	18638433	18638847	547	12.84
chr16	20490579	20491192	548	20.34
chr16	20498624	20499057	549	15.65
chr16	22440394	22440875	550	19.8
chr16	31355090	31355550	551	78.52
chr16	31883172	31883992	552	13.52
chr16	33056385	33056710	553	54.26
chr16	33941206	33942208	554	11.81
chr16	34342446	34342969	555	19.63
chr16	36056734	36057252	556	20.98
chr16	37715193	37715530	557	26.15
chr16	37749237	37749751	558	7.61
chr16	37813979	37814760	559	45.03
chr16	56049059	56049405	560	17.87
chr16	58727796	58728224	561	27.85
chr16	77644640	77645058	562	35.23
chr16	84548900	84549804	563	10.41
chr16	92117772	92118364	564	14.04
chr16	92400254	92401076	565	9.81
chr16	93446259	93447042	566	23.06
chr16	94535158	94535604	567	12.51
chr16	95612426	95613106	568	11.38
chr17	7473392	7474266	569	24.53
chr17	12311873	12312379	570	15.68
chr17	21703634	21704268	571	16.93
chr17	25702192	25702715	572	12.46
chr17	25864083	25864763	573	44.94
chr17	25940149	25940552	574	20.42
chr17	25960489	25960806	575	25.54
chr17	26697869	26698253	576	13.45
chr17	27920551	27921090	577	12.42
chr17	27956497	27956863	578	9.84
chr17	29019214	29019579	579	41.03
chr17	29382560	29383310	580	10.64
chr17	29651475	29652207	581	32.94
chr17	30483707	30484782	582	24.86
chr17	31147966	31148741	583	16.87
chr17	31776446	31777443	584	14.5
chr17	31993523	31993906	585	21.41
chr17	32254449	32255930	586	8.22
chr17	32372545	32373129	587	38.74
chr17	32890430	32890918	588	13.56
chr17	33495380	33495966	589	25.47
chr17	35301843	35302245	590	11.57
chr17	35378134	35378925	591	26.07
chr17	37165582	37166037	592	34.62
chr17	46200378	46201385	593	21.08
chr17	46211812	46212520	594	20.83
chr17	46419707	46420459	595	26.67
chr17	46464523	46465501	596	25.79
chr17	46919186	46920189	597	32.74
chr17	47049221	47049683	598	16.47
chr17	50385397	50386527	599	22.92
chr17	56766234	56766858	600	10.36
chr17	57150481	57151088	601	36.9
chr17	57387580	57388072	602	45.62
chr17	64681320	64682431	603	18.14
chr17	65251127	65251882	604	15.51
chr17	66086986	66087539	605	35.81
chr17	66612069	66612560	606	9.87
chr17	66828255	66828969	607	21.52
chr17	73620641	73622008	608	30.84
chr17	80463144	80463834	609	30.56
chr17	80547735	80548249	610	15.4
chr17	81246326	81246920	611	12.53
chr17	81953381	81954168	612	21.77
chr17	83652439	83652904	613	17.97
chr17	83913481	83913934	614	12.29
chr17	83963264	83963888	615	13.25
chr17	84515420	84515939	616	21.53
chr17	84552070	84552722	617	20.45
chr17	85489101	85490114	618	25.59
chr18	5819758	5820478	619	17.6
chr18	6410371	6411295	620	10.96
chr18	6419360	6420060	621	58.91
chr18	6764797	6765189	622	24.78
chr18	21458754	21459024	623	14.75
chr18	33321421	33321688	624	12.86
chr18	33321901	33322333	625	15.14
chr18	34407016	34407563	626	31.92
chr18	34418839	34419218	627	8.99
chr18	35691984	35692327	628	13.97
chr18	36839173	36839737	629	11.88
chr18	36961149	36961919	630	48.95
chr18	38011645	38012064	631	19.84
chr18	38227458	38228546	632	16.77
chr18	38303855	38304621	633	22.73
chr18	38324749	38325295	634	12.26
chr18	38333287	38334613	635	23.74
chr18	38363347	38363729	636	11.59
chr18	39255615	39256313	637	31.81
chr18	42968375	42968801	638	8.43
chr18	54393542	54394227	639	19.83
chr18	56591565	56592241	640	22.91
chr18	61824712	61825119	641	14.74
chr18	61953324	61953773	642	17.61
chr18	64225836	64227014	643	17.65
chr18	64641947	64642599	644	10.49
chr18	76194814	76195358	645	33.77
chr18	77285367	77286022	646	45.57
chr18	80984649	80985480	647	13.07
chr19	4497424	4497819	648	45.57
chr19	4981724	4982175	649	25.53
chr19	5345678	5346118	650	21.03
chr19	6236041	6236546	651	19.81
chr19	6303917	6305184	652	19.13
chr19	7157448	7157922	653	13.51
chr19	7291961	7292685	654	18.57
chr19	8787139	8787642	655	107.32
chr19	8945850	8946140	656	18.9
chr19	9041239	9042541	657	18
chr19	9127466	9128280	658	108.25
chr19	10340664	10341439	659	19.75
chr19	20077053	20077354	660	9.71
chr19	23454164	23454518	661	22.47
chr19	30623341	30624214	662	23.78
chr19	32446729	32447279	663	32.93
chr19	33298643	33299106	664	31.28
chr19	37436961	37437460	665	22.33
chr19	38298396	38299137	666	11.26
chr19	38312377	38313828	667	26.26
chr19	41771695	41772404	668	18.09
chr19	42226457	42226931	669	18.59
chr19	42799367	42799862	670	25.21
chr19	46131685	46132191	671	14.71
chr19	46574220	46574844	672	27.43
chr19	46647536	46648238	673	12.97
chr19	53837226	53837745	674	32.48
chr19	54018706	54019274	675	11.46
chr19	56044486	56045034	676	14.21
chr19	56662760	56663339	677	25.65
chr19	57210200	57211150	678	30.82
chr19	57316246	57317352	679	26
chr19	57347033	57347724	680	12.74
chr19	58935518	58935855	681	19.66
chr19	58978307	58978826	682	39.57
chr19	59150689	59151426	683	17.9
chr19	59364135	59365096	684	15.83
chr2	3340726	3341800	685	18.2
chr2	3630203	3630682	686	24.45
chr2	4153694	4154592	687	13.11
chr2	4475999	4476656	688	23.15
chr2	4838155	4839660	689	28.83
chr2	5516476	5517603	690	59.23
chr2	5535686	5536545	691	29.91
chr2	5765384	5766659	692	25.9
chr2	9355092	9355772	693	43.23
chr2	10001986	10002456	694	18.66
chr2	11351279	11351763	695	18.53
chr2	12102206	12102623	696	22.87
chr2	12310793	12311066	697	13.71
chr2	13192529	13193538	698	21.46
chr2	20815815	20816147	699	21.26
chr2	21880052	21880898	700	14.88
chr2	22077953	22078757	701	18.76
chr2	22895153	22896086	702	18.86
chr2	25211664	25212275	703	24.34
chr2	26003175	26003622	704	10.92
chr2	27287987	27288394	705	19.25
chr2	27369871	27370739	706	24.2
chr2	27619934	27620778	707	16.51
chr2	27626402	27626950	708	17.02
chr2	28099966	28100622	709	19.31
chr2	28133502	28134460	710	22.22
chr2	28225177	28226227	711	13.82
chr2	28372762	28373701	712	17.17
chr2	29437715	29438449	713	16.77
chr2	30060865	30061576	714	29.04
chr2	30141693	30142037	715	47.81
chr2	30409382	30409820	716	23.67
chr2	30468963	30469564	717	42.2
chr2	30514583	30515166	718	9.66
chr2	30571812	30572875	719	15.81
chr2	30783488	30784844	720	18.82
chr2	31049978	31050730	721	12.09
chr2	31447126	31447876	722	7.44
chr2	32023024	32024131	723	17.21
chr2	32294771	32295978	724	27.6
chr2	32426136	32426669	725	16.92
chr2	32582731	32583276	726	17.96
chr2	32701746	32702568	727	33.91
chr2	32978372	32979219	728	11.84
chr2	33882081	33883224	729	21.72
chr2	34342672	34343116	730	10.8
chr2	34609860	34610161	731	20.7
chr2	35761816	35762301	732	15.65
chr2	37603664	37604204	733	15.64
chr2	37630021	37630396	734	21.68
chr2	39228634	39228950	735	30.71
chr2	48805151	48805749	736	17.61
chr2	52601028	52601868	737	17.03
chr2	58134616	58135267	738	27.41
chr2	59465494	59466765	739	16.52
chr2	59874983	59875670	740	15.88
chr2	60701706	60702293	741	13.43
chr2	60739592	60739852	742	11.83
chr2	60760311	60760831	743	36.87
chr2	63657286	63657910	744	14.87
chr2	66247853	66248349	745	18.63
chr2	73410440	73410946	746	18.66
chr2	77784080	77784629	747	16.37
chr2	84981058	84981364	748	12.55
chr2	91042264	91043285	749	39.81
chr2	93125577	93126379	750	14.81
chr2	93689904	93690342	751	56.55
chr2	93726022	93726624	752	24.02
chr2	101838815	101839464	753	10.35
chr2	102289737	102290105	754	12.78
chr2	104016948	104017357	755	22.72
chr2	105843150	105843612	756	25.47
chr2	109970578	109971293	757	18.66
chr2	112289952	112290217	758	13.89
chr2	116561385	116561825	759	26.54
chr2	117125734	117126248	760	19.44
chr2	117264624	117265241	761	34.72
chr2	118988593	118989171	762	16.48
chr2	119130652	119131138	763	17.08
chr2	119443853	119444648	764	18.08
chr2	121119800	121120410	765	12.78
chr2	125485680	125486501	766	24.92
chr2	126834173	126834748	767	23.15
chr2	127255721	127256274	768	12.96
chr2	127288042	127288321	769	18.91
chr2	127337057	127337706	770	52.93
chr2	128643241	128643573	771	12.53
chr2	129894140	129894398	772	11.8
chr2	130161896	130162381	773	10.6
chr2	131030151	131030848	774	15.33
chr2	131087457	131088136	775	19.59
chr2	132340741	132341198	776	42.1
chr2	135681660	135682120	777	33.08
chr2	135934096	135934723	778	24.37
chr2	136505304	136506094	779	32.63
chr2	139596824	139597168	780	6.93
chr2	140496429	140497473	781	20.59
chr2	144352860	144353539	782	36.26
chr2	145414155	145414572	783	29.45
chr2	146156311	146157217	784	19.21
chr2	147003354	147003739	785	16.55
chr2	151705196	151706099	786	39.22
chr2	151726647	151727039	787	10.65
chr2	152218581	152219245	788	30.01
chr2	152972882	152973744	789	16.54
chr2	153905361	153905672	790	7.2
chr2	155134645	155135479	791	36.79
chr2	156875214	156876099	792	31.25
chr2	157174652	157175426	793	15.26
chr2	157342900	157343748	794	16.81
chr2	157371026	157372616	795	20.65
chr2	158205410	158205799	796	16.41
chr2	158410627	158410956	797	6.97
chr2	160152705	160153606	798	18.69
chr2	160280858	160281558	799	21.86
chr2	162978059	162978838	800	13.75
chr2	163078506	163079223	801	10.61
chr2	163544640	163545386	802	14.37
chr2	167686016	167686667	803	15.31
chr2	167842427	167842696	804	24.74
chr2	169137501	169138087	805	11.14
chr2	169575963	169576874	806	29.4
chr2	170698846	170699283	807	12.16
chr2	173555414	173556370	808	12.7
chr2	174298610	174299547	809	13.28
chr2	179991562	179992152	810	19.59
chr2	180891577	180892083	811	28.01
chr2	181415488	181415707	812	7.63
chr2	181449168	181449946	813	16
chr2	181493582	181494722	814	17.91
chr2	181499292	181500453	815	28.01
chr3	19529911	19530651	816	25.37
chr3	28463756	28464240	817	12.74
chr3	31044401	31045187	818	11.47
chr3	32635165	32636102	819	25.88
chr3	36374706	36375046	820	16.55
chr3	37625678	37625989	821	9.11
chr3	41212250	41212706	822	30.69
chr3	51415713	51416762	823	12.87
chr3	51452233	51452704	824	27.95
chr3	58517902	58518383	825	26.85
chr3	58589644	58590480	826	12.36
chr3	75760645	75761302	827	15.48
chr3	79322833	79323496	828	20.95
chr3	83831548	83832095	829	11.96
chr3	86491654	86492149	830	22.19
chr3	87846897	87847401	831	16.78
chr3	88895428	88896113	832	11.37
chr3	88986850	88987296	833	14.08
chr3	89576401	89576964	834	15.43
chr3	94800820	94801541	835	15.79
chr3	94846205	94846889	836	19.75
chr3	95804800	95805335	837	17.23
chr3	96082002	96082806	838	13.66
chr3	97571754	97572295	839	9.82
chr3	97694202	97694761	840	18.19
chr3	100725888	100726325	841	24.07
chr3	101521429	101522506	842	16.91
chr3	103319938	103320643	843	37.51
chr3	104478106	104478520	844	25.7
chr3	107081821	107082130	845	23.13
chr3	107239145	107239819	846	13.22
chr3	108357490	108357873	847	28.84
chr3	108565240	108565623	848	12.49
chr3	108573992	108574455	849	14.69
chr3	118132885	118133543	850	23.53
chr3	120587180	120587465	851	20.22
chr3	120945184	120945498	852	17.51
chr3	120945917	120946597	853	16.19
chr3	121279815	121280752	854	32.66
chr3	121291790	121292476	855	38.98
chr3	122212112	122212754	856	21.49
chr3	122364938	122365621	857	19.13
chr3	122871620	122871989	858	12.23
chr3	126534343	126535007	859	17.59
chr3	127256028	127256537	860	35.15
chr3	132346426	132346989	861	12.64
chr3	133002230	133002842	862	11.02
chr3	135304017	135305202	863	20.52
chr3	137447429	137448546	864	18.58
chr3	141490964	141491601	865	28.93
chr3	142223497	142224105	866	10.3
chr3	144634540	144635174	867	14.63
chr3	151768168	151768693	868	24.81
chr3	151769706	151770390	869	14.29
chr3	153054350	153055067	870	17.28
chr3	154355060	154355919	871	37.95
chr4	9505359	9505690	872	11.62
chr4	11380982	11381309	873	22.37
chr4	21702979	21703442	874	15.66
chr4	32949276	32949777	875	36.24
chr4	32949941	32950708	876	12.53
chr4	33039407	33040161	877	9.44
chr4	33396813	33397430	878	8.11
chr4	40823930	40824625	879	8.86
chr4	41454239	41454763	880	22.91
chr4	41709430	41709961	881	9.14
chr4	43491884	43492529	882	14.92
chr4	48089485	48090679	883	13.13
chr4	54038418	54038780	884	14.47
chr4	66143613	66144864	885	13.2
chr4	88699507	88699989	886	30.08
chr4	88775116	88775595	887	13.86
chr4	88783055	88783477	888	9.22
chr4	91011795	91012572	889	12.23
chr4	91047869	91048687	890	22.1
chr4	101319472	101320122	891	11.73
chr4	101717974	101718838	892	12.13
chr4	109806219	109807490	893	27.9
chr4	116380658	116381683	894	42.79
chr4	116861979	116862320	895	18.69
chr4	117933834	117934337	896	14.15
chr4	124410640	124411326	897	28.57
chr4	128286733	128287561	898	26.33
chr4	128329983	128330526	899	43.42
chr4	128635606	128636044	900	17.67
chr4	128866909	128867576	901	30.67
chr4	128940275	128941764	902	22.37
chr4	129138134	129139094	903	15.53
chr4	129561115	129561690	904	15.98
chr4	129879277	129886340	905	32.17
chr4	130146629	130147646	906	19.11
chr4	131042179	131043145	907	36.04
chr4	131721383	131723806	908	18.59
chr4	131864336	131864971	909	47.12
chr4	132069395	132070101	910	24.89
chr4	132323755	132324385	911	16.19
chr4	132364169	132364607	912	9.68
chr4	132784862	132786301	913	26.6
chr4	132901567	132902155	914	19.46
chr4	132988357	132988876	915	20.81
chr4	133227147	133227595	916	18.98
chr4	133313262	133313783	917	22.04
chr4	133525030	133525451	918	10.45
chr4	133556412	133556930	919	55.27
chr4	133574270	133576218	920	13.94
chr4	133934029	133935074	921	16.36
chr4	133985845	133986965	922	20.31
chr4	134447961	134448376	923	24.59
chr4	135501953	135502461	924	12.13
chr4	135719392	135719867	925	11.94
chr4	135780823	135781329	926	23.43
chr4	135815973	135816764	927	15.95
chr4	136560765	136561261	928	19.82
chr4	137917117	137917389	929	23.94
chr4	138469858	138470486	930	16.28
chr4	138527909	138528487	931	24.1
chr4	138735259	138736190	932	52.4
chr4	138908413	138909212	933	25.27
chr4	140069412	140070146	934	26.31
chr4	140485711	140486438	935	17.72
chr4	141409001	141409865	936	25.92
chr4	147246477	147246931	937	15.49
chr4	147596926	147597764	938	22.86
chr4	148800512	148801125	939	60.29
chr4	148819374	148819822	940	14.74
chr4	149622111	149622470	941	9.56
chr4	149640719	149641338	942	25.27
chr4	149930989	149931326	943	49.13
chr4	151692474	151693426	944	13.74
chr4	151779872	151780968	945	21.8
chr4	154742593	154743406	946	19.85
chr5	19497239	19497868	947	7.29
chr5	24083077	24083930	948	22.06
chr5	25259820	25260484	949	12.13
chr5	28032741	28033425	950	20.19
chr5	29576637	29576888	951	21.12
chr5	30098566	30099177	952	16.62
chr5	30153259	30154254	953	25.16
chr5	30168970	30169794	954	13.02
chr5	30940316	30940953	955	22.49
chr5	31247924	31248425	956	28.04
chr5	31891926	31892439	957	15.65
chr5	32500018	32500405	958	8.86
chr5	33196784	33197253	959	22.3
chr5	35704280	35705016	960	39.43
chr5	36097846	36098511	961	16.64
chr5	37139848	37140219	962	13.97
chr5	38698896	38699511	963	21.08
chr5	42235403	42235810	964	26.21
chr5	42279208	42279886	965	28.24
chr5	42458878	42459872	966	16.68
chr5	43847165	43847875	967	65.66
chr5	45793942	45794438	968	20.64
chr5	48261136	48261686	969	13.87
chr5	48572927	48573239	970	12.35
chr5	53626696	53627717	971	21.1
chr5	54063229	54063950	972	29.01
chr5	65202475	65202916	973	17.07
chr5	67339105	67339949	974	20.8
chr5	68206791	68207755	975	30.37
chr5	78236745	78237186	976	18.77
chr5	90768491	90769002	977	76.24
chr5	92213072	92213359	978	13.04
chr5	92546709	92547212	979	16.81
chr5	92864176	92864859	980	72.15
chr5	92927703	92928195	981	20.25
chr5	100647244	100647925	982	22.67
chr5	107963506	107963842	983	21.71
chr5	109895867	109896422	984	32.7
chr5	110295326	110295931	985	13.18
chr5	110834956	110835798	986	13.04
chr5	113483341	113483890	987	19.21
chr5	113528580	113528925	988	26.32
chr5	114305692	114306157	989	16.1
chr5	114371170	114371577	990	14.57
chr5	115891578	115892080	991	9.63
chr5	115939308	115940448	992	23.5
chr5	116225351	116226019	993	38.57
chr5	116772436	116773253	994	14.97
chr5	116957534	116958148	995	11.17
chr5	117043055	117043467	996	13.34
chr5	119662666	119663707	997	19.13
chr5	120915973	120916546	998	19.96
chr5	120955217	120956180	999	13.65
chr5	122051920	122052253	1000	14.64
chr5	123099346	123099912	1001	16.81
chr5	123331109	123331703	1002	8.67
chr5	125621902	125622698	1003	13.17
chr5	125669186	125670462	1004	26.5
chr5	125889156	125889641	1005	42.38
chr5	129458654	129459773	1006	20.03
chr5	129915333	129915804	1007	18.4
chr5	132506772	132507216	1008	20.18
chr5	137462459	137462959	1009	8.37
chr5	137727853	137728727	1010	16.63
chr5	138175579	138176217	1011	21.33
chr5	138227737	138229020	1012	11.47
chr5	138882563	138882943	1013	25.12
chr5	139820715	139821556	1014	21.34
chr5	140797360	140797958	1015	19.94
chr5	141025606	141025998	1016	18.29
chr5	141180491	141181380	1017	43.07
chr5	142924127	142924376	1018	28.06
chr5	143001166	143001633	1019	13.35
chr5	144308272	144308735	1020	26.78
chr5	144378734	144379221	1021	35.87
chr5	145726859	145727322	1022	23.05
chr5	145952184	145952731	1023	13.74
chr5	148569513	148570508	1024	14.43
chr5	149300782	149301249	1025	29.14
chr5	149995629	149996668	1026	27.42
chr5	150138310	150138877	1027	15.1
chr5	151059566	151059932	1028	12.42
chr5	151467843	151468644	1029	16.69
chr5	151779959	151780648	1030	10.15
chr6	7355296	7356242	1031	15.31
chr6	13821099	13821791	1032	15.62
chr6	14157486	14157856	1033	22.48
chr6	17625130	17625722	1034	28.15
chr6	17929261	17929700	1035	12.98
chr6	28869182	28869826	1036	17.56
chr6	28974044	28974620	1037	28.86
chr6	29228473	29229293	1038	11.9
chr6	29599840	29600118	1039	22.48
chr6	30459143	30459846	1040	18.85
chr6	30487767	30488306	1041	8.4
chr6	30614465	30615480	1042	11.88
chr6	31468805	31469488	1043	37.02
chr6	32429181	32429753	1044	28.04
chr6	33076436	33076935	1045	11
chr6	33198731	33199297	1046	40.36
chr6	35201654	35202657	1047	13.43
chr6	35329867	35330596	1048	37.22
chr6	36987130	36987440	1049	20.58
chr6	37014019	37015016	1050	27.43
chr6	38483317	38483963	1051	26.37
chr6	39492684	39493478	1052	13.37
chr6	42274939	42275650	1053	14.93
chr6	47600499	47601661	1054	32.41
chr6	48529227	48529660	1055	20.86
chr6	49620521	49621266	1056	17.97
chr6	50062890	50063321	1057	11.87
chr6	50210992	50212608	1058	14.55
chr6	51542255	51542615	1059	18.17
chr6	53860373	53861162	1060	13.56
chr6	54110683	54111151	1061	18.35
chr6	54266665	54267076	1062	21.23
chr6	54382748	54383600	1063	15.62
chr6	55116943	55117385	1064	25.03
chr6	55357763	55358182	1065	18.03
chr6	56874015	56874504	1066	47.98
chr6	70747530	70748115	1067	9.65
chr6	71453524	71454331	1068	19.13
chr6	71781668	71782096	1069	40.78
chr6	71858578	71859256	1070	50.21
chr6	72485166	72485585	1071	32.36
chr6	72502175	72502882	1072	15.88
chr6	73103664	73103981	1073	14.16
chr6	83092884	83093385	1074	12.46
chr6	83115404	83115889	1075	19.66
chr6	84222231	84222982	1076	13.02
chr6	86314320	86314772	1077	36.55
chr6	86421644	86422844	1078	22.07
chr6	87788705	87789227	1079	21.5
chr6	87818526	87819435	1080	20.05
chr6	88781495	88781906	1081	9.79
chr6	90715923	90716467	1082	11.59
chr6	91209848	91210821	1083	24.31
chr6	92236339	92237028	1084	22.3
chr6	94115744	94116420	1085	14.77
chr6	94251762	94252406	1086	24.66
chr6	97567274	97568036	1087	16.47
chr6	97831642	97832338	1088	15.18
chr6	98897598	98898123	1089	15.83
chr6	99619620	99620427	1090	23.23
chr6	100024481	100025596	1091	15.54
chr6	100077089	100077710	1092	9.41
chr6	100112892	100113665	1093	23.68
chr6	100154688	100155470	1094	15.88
chr6	100272147	100272783	1095	13.67
chr6	100833315	100833729	1096	18.6
chr6	108162923	108163391	1097	31.71
chr6	112774018	112774625	1098	12.5
chr6	114354079	114354556	1099	19.55
chr6	115806346	115807007	1100	28.08
chr6	118286758	118287382	1101	30.09
chr6	118674820	118675306	1102	82.56
chr6	119989665	119990044	1103	29.32
chr6	120488994	120489973	1104	10.93
chr6	121094737	121095517	1105	16.39
chr6	124778196	124780235	1106	28.1
chr6	125423360	125424022	1107	16.85
chr6	128788284	128788961	1108	20.18
chr6	135319426	135320279	1109	19.78
chr6	137695764	137696377	1110	18.08
chr6	140430258	140430950	1111	32.84
chr6	145023750	145024587	1112	10.75
chr6	145290030	145291083	1113	12.08
chr6	145431385	145432060	1114	18.91
chr6	146623396	146624417	1115	35.4
chr6	148075241	148075786	1116	34.96
chr6	148084429	148085122	1117	32.05
chr6	149357011	149358183	1118	17.29
chr7	4641463	4642313	1119	40.62
chr7	4691122	4691828	1120	30.37
chr7	4763972	4764807	1121	34.23
chr7	4966410	4966958	1122	35.71
chr7	17313914	17314284	1123	13.65
chr7	17476312	17477460	1124	26.66
chr7	19534750	19535408	1125	13.88
chr7	19704540	19705634	1126	29.8
chr7	25101626	25102118	1127	13.54
chr7	25192160	25192391	1128	10.74
chr7	25689030	25689633	1129	10.58
chr7	25717930	25718519	1130	15.56
chr7	25964945	25966818	1131	36.21
chr7	26022760	26023695	1132	40.3
chr7	28017604	28018305	1133	21.81
chr7	28232186	28233526	1134	9.38
chr7	30551757	30552390	1135	16.61
chr7	36103788	36104163	1136	13.83
chr7	36104466	36105208	1137	12.96
chr7	50508790	50509332	1138	22.14
chr7	51629144	51630181	1139	23.03
chr7	52817247	52818203	1140	9.44
chr7	54255884	54256354	1141	40.55
chr7	63297707	63298261	1142	11.17
chr7	68935259	68935866	1143	9.87
chr7	73964869	73965221	1144	21.76
chr7	83513976	83514781	1145	13.04
chr7	83739482	83739754	1146	23.92
chr7	85521288	85522143	1147	10.96
chr7	87065412	87066201	1148	10.7
chr7	87487171	87488831	1149	12.83
chr7	87958367	87958767	1150	51.03
chr7	91927791	91928348	1151	12.43
chr7	98836482	98837004	1152	23.18
chr7	104099228	104100011	1153	18.57
chr7	105489652	105490371	1154	19.06
chr7	106397768	106398606	1155	15.39
chr7	106508270	106509010	1156	22.98
chr7	106797132	106797769	1157	18.46
chr7	106942576	106943099	1158	22.97
chr7	107854617	107854954	1159	8.34
chr7	108576033	108576662	1160	14.56
chr7	109213170	109214041	1161	43.81
chr7	112900481	112900882	1162	23.86
chr7	112926079	112926822	1163	15.25
chr7	116175441	116176002	1164	16.94
chr7	116287995	116289003	1165	31.03
chr7	117914313	117915096	1166	44.67
chr7	119969648	119970363	1167	17.95
chr7	123232453	123232833	1168	23.38
chr7	128738846	128739562	1169	25.88
chr7	129083262	129083769	1170	12.87
chr7	130251888	130252276	1171	22.56
chr7	132552341	132552900	1172	15.21
chr7	133726364	133727428	1173	16.17
chr7	134119286	134119901	1174	30.42
chr7	134253776	134254512	1175	39.65
chr7	134339060	134339938	1176	19.07
chr7	134421462	134422153	1177	12.42
chr7	134621342	134622166	1178	17.46
chr7	134856140	134856947	1179	16.67
chr7	134904703	134905255	1180	18.19
chr7	134912403	134912704	1181	58.27
chr7	134985901	134986366	1182	23.56
chr7	135672806	135673551	1183	15.03
chr7	135693355	135694159	1184	22.37
chr7	135814868	135816521	1185	17.41
chr7	137812864	137813405	1186	25.69
chr7	140900716	140901447	1187	14.42
chr7	144420386	144421314	1188	15
chr7	146862171	146862655	1189	30.51
chr7	147268160	147268650	1190	45.66
chr7	148246095	148246674	1191	26.51
chr7	148414260	148414765	1192	14.15
chr7	149470432	149470857	1193	12.52
chr7	149657280	149657724	1194	17.23
chr7	150080608	150080980	1195	17.09
chr7	150101889	150103413	1196	37.36
chr7	150104647	150105681	1197	21.07
chr7	150655834	150656346	1198	13.93
chr8	3621183	3621816	1199	17.38
chr8	3645719	3646263	1200	15.48
chr8	4612904	4613834	1201	18.15
chr8	10644528	10645525	1202	19.75
chr8	10865301	10865799	1203	6.89
chr8	10912370	10912835	1204	15.61
chr8	11186992	11187981	1205	25.44
chr8	11261944	11263055	1206	21.94
chr8	11300381	11301135	1207	25.21
chr8	11775531	11776538	1208	13
chr8	12324718	12325449	1209	29.04
chr8	13025849	13026189	1210	21.61
chr8	13550922	13551529	1211	79.4
chr8	13705611	13706716	1212	14.94
chr8	13724283	13724901	1213	13.49
chr8	15003119	15003507	1214	29.31
chr8	16203827	16204591	1215	23.66
chr8	18899002	18899534	1216	28.11
chr8	18944936	18945354	1217	36.51
chr8	18953917	18954387	1218	29.66
chr8	20020073	20020582	1219	52.63
chr8	23521392	23522048	1220	36.88
chr8	23706868	23707306	1221	13.51
chr8	23719373	23719921	1222	42.48
chr8	23816996	23817906	1223	13.92
chr8	23918321	23918996	1224	15.83
chr8	25657769	25658186	1225	12.39
chr8	26137980	26138592	1226	16.89
chr8	26154214	26155142	1227	17.68
chr8	27355888	27356918	1228	13.1
chr8	27382669	27382905	1229	16.31
chr8	27462514	27463828	1230	28.01
chr8	27475203	27475528	1231	21.37
chr8	33403550	33404052	1232	54.88
chr8	35251734	35252487	1233	41.44
chr8	35288063	35288936	1234	28.14
chr8	36724997	36725825	1235	16.94
chr8	36770920	36771224	1236	35.41
chr8	36928660	36929411	1237	21.7
chr8	37114067	37114365	1238	13.34
chr8	37591267	37591730	1239	12.06
chr8	37790127	37790957	1240	20.67
chr8	41720170	41720414	1241	20.26
chr8	42104675	42105387	1242	23.69
chr8	42109060	42109510	1243	20.4
chr8	42161037	42161979	1244	14.5
chr8	42324567	42324999	1245	11.75
chr8	42459762	42460436	1246	26.99
chr8	46070749	46071250	1247	21.47
chr8	46881529	46882121	1248	28.81
chr8	46934502	46935133	1249	17.9
chr8	47016051	47017273	1250	19.63
chr8	47019887	47020937	1251	25.97
chr8	47178639	47179034	1252	19.39
chr8	47302211	47302871	1253	26.95
chr8	47531218	47532143	1254	25.97
chr8	47977544	47978709	1255	35.43
chr8	48026286	48027075	1256	23.54
chr8	48307932	48308373	1257	16.24
chr8	48419200	48419954	1258	20.01
chr8	48618405	48619243	1259	24.89
chr8	48872961	48873553	1260	36.25
chr8	48974801	48975196	1261	14.05
chr8	59029235	59030539	1262	38
chr8	59117838	59118436	1263	20.57
chr8	59492535	59493222	1264	60.75
chr8	59990128	59990833	1265	22.92
chr8	60282513	60283250	1266	33.21
chr8	63338493	63339060	1267	57.88
chr8	69383812	69384236	1268	12.08
chr8	71732441	71733368	1269	19.26
chr8	71794459	71795307	1270	37
chr8	72240717	72241279	1271	19.34
chr8	72273499	72274263	1272	27.63
chr8	72333063	72333407	1273	8.62
chr8	72425184	72425849	1274	39.9
chr8	72696084	72696553	1275	36.9
chr8	72758056	72758477	1276	20.23
chr8	72806228	72806698	1277	28.56
chr8	73034171	73034658	1278	20.85
chr8	73131486	73132082	1279	23.72
chr8	73207925	73208773	1280	24.19
chr8	73222142	73222722	1281	39.78
chr8	73289928	73290844	1282	22.56
chr8	73421119	73422378	1283	46.07
chr8	74020086	74020870	1284	26.38
chr8	74431757	74432562	1285	45.46
chr8	74796325	74796700	1286	31.32
chr8	74945309	74946116	1287	11.56
chr8	75765899	75766548	1288	19.44
chr8	77357701	77358420	1289	13.82
chr8	85370102	85370640	1290	11.89
chr8	86419713	86420143	1291	44.91
chr8	86445518	86446105	1292	31.21
chr8	87334984	87335510	1293	25.91
chr8	87514113	87515232	1294	28.4
chr8	91278974	91279799	1295	27.35
chr8	93400156	93401083	1296	23.97
chr8	93543734	93543994	1297	11.51
chr8	93836970	93837620	1298	13.14
chr8	96729689	96729987	1299	18.19
chr8	97016127	97016728	1300	16.63
chr8	97226589	97227068	1301	29.29
chr8	97524406	97525196	1302	9.11
chr8	97604043	97605115	1303	15.81
chr8	104627705	104628080	1304	29.4
chr8	105019721	105020305	1305	9.81
chr8	107644717	107645283	1306	22.65
chr8	107676790	107677509	1307	24.36
chr8	107993151	107994484	1308	16.18
chr8	108794753	108795202	1309	23.48
chr8	111005153	111005862	1310	21.24
chr8	111804487	111804817	1311	44.15
chr8	111940372	111941630	1312	13.37
chr8	112023250	112023642	1313	17.69
chr8	112393091	112393675	1314	15.29
chr8	113823198	113823832	1315	15.52
chr8	114014027	114014585	1316	16.52
chr8	114260119	114260577	1317	18.96
chr8	114271733	114272132	1318	20.47
chr8	116729013	116729535	1319	15.93
chr8	116833409	116833726	1320	11
chr8	116875044	116876315	1321	19.3
chr8	119895857	119896525	1322	29.09
chr8	122702378	122703599	1323	54.02
chr8	123041571	123043604	1324	15.32
chr8	123073164	123073613	1325	16.37
chr8	123087404	123088061	1326	15.64
chr8	123088208	123088576	1327	26.63
chr8	123112788	123113942	1328	21.2
chr8	124365143	124365888	1329	18.62
chr8	124371965	124372616	1330	17.81
chr8	124421704	124422712	1331	17.25
chr8	124459300	124460146	1332	15.88
chr8	124460306	124460606	1333	29.57
chr8	124697924	124698390	1334	24.54
chr8	124704969	124706341	1335	20.4
chr8	124804148	124804828	1336	16.64
chr8	125188270	125189402	1337	19.99
chr8	125240494	125241129	1338	22.1
chr8	125302808	125303452	1339	13.86
chr8	125933872	125934523	1340	39.56
chr8	126311136	126311899	1341	38.63
chr8	127564683	127566026	1342	20.03
chr8	128144261	128144919	1343	27.89
chr8	128906406	128906910	1344	8.47
chr8	129137962	129139984	1345	41.81
chr8	129190160	129191073	1346	54.04
chr8	129210799	129212277	1347	24.68
chr8	129258857	129259777	1348	25.09
chr8	129291094	129291831	1349	18.01
chr8	129373247	129374087	1350	16.16
chr8	130526081	130526645	1351	49.55
chr8	130557925	130558431	1352	15.74
chr8	130886564	130887524	1353	32.26
chr9	15796446	15797686	1354	10.19
chr9	20385500	20386033	1355	16.05
chr9	21216092	21216644	1356	20.39
chr9	24846976	24847524	1357	24.89
chr9	30983607	30984700	1358	14.1
chr9	32631254	32631688	1359	15.88
chr9	34824210	34825484	1360	13.71
chr9	34983381	34983902	1361	12.5
chr9	40158234	40158689	1362	20.77
chr9	40383113	40383935	1363	16.46
chr9	40607657	40608056	1364	15.58
chr9	44113323	44114213	1365	8.81
chr9	44529542	44530187	1366	16.59
chr9	45262908	45263534	1367	26.15
chr9	45263760	45264198	1368	15.43
chr9	46197410	46197767	1369	27.25
chr9	46630776	46631746	1370	11.74
chr9	47230112	47230600	1371	7.87
chr9	47246641	47247324	1372	18.16
chr9	47702173	47702822	1373	17.72
chr9	51143461	51144018	1374	12.66
chr9	55174910	55175635	1375	16.32
chr9	57268216	57269374	1376	25.94
chr9	57679144	57679892	1377	26.36
chr9	57909059	57909578	1378	11.34
chr9	58257891	58258266	1379	22.57
chr9	58305231	58305886	1380	16.41
chr9	60841540	60842568	1381	11.67
chr9	61282844	61284208	1382	12.4
chr9	62091787	62092388	1383	12.79
chr9	62676284	62676930	1384	19.55
chr9	64584082	64584883	1385	13.16
chr9	67310361	67311629	1386	24.05
chr9	70682304	70683394	1387	12.48
chr9	75111726	75112177	1388	20.21
chr9	75151561	75152366	1389	12.7
chr9	75283321	75284053	1390	24.66
chr9	79654498	79654775	1391	24.2
chr9	85221712	85222514	1392	15.14
chr9	86894676	86895176	1393	21.8
chr9	95854587	95855425	1394	15.52
chr9	96035345	96036160	1395	20.43
chr9	96569103	96569449	1396	18.32
chr9	96570056	96570735	1397	25.67
chr9	101374900	101375310	1398	21.31
chr9	103904178	103905107	1399	19.75
chr9	106378511	106379673	1400	36.02
chr9	107546924	107547386	1401	20.28
chr9	107806984	107807500	1402	29.63
chr9	110207600	110208257	1403	28.81
chr9	114411769	114412793	1404	28.76
chr9	114997286	114997884	1405	12.66
chr9	117812170	117812507	1406	16.54
chr9	121246498	121247294	1407	12.62
chr9	121957010	121957836	1408	21.36
chr9	122142916	122143906	1409	11.61
chr9	123275659	123276045	1410	23.09
chrX	7708913	7709911	1411	28.61
chrX	10570259	10570828	1412	15.88
chrX	20425260	20425911	1413	20.97
chrX	70299267	70299819	1414	14.3
chrX	71658764	71659011	1415	34.05
chrX	72919043	72919921	1416	29.98
chrX	109484381	109484852	1417	35.98
chrX	132419887	132420131	1418	17.74
chrX	137490850	137492031	1419	19.44
chrX	137530369	137534027	1420	18.43
chrX	137584093	137590551	1421	14.21
chrX	139135963	139136703	1422	8.56
chrX	139493272	139493996	1423	23.67
chrX	146912386	146913382	1424	21.26
chrX	147391136	147391907	1425	49.63
chrX	149867879	149868658	1426	21.06

## Sheet: DALI_input
chr1	6719306	6719720	0	7.83
chr1	7385587	7385914	1	22.74
chr1	9531363	9531661	2	11.44
chr1	9535194	9535741	3	23.2
chr1	9617251	9617952	4	7.53
chr1	16094192	16094535	5	14.38
chr1	16094821	16095132	6	10.75
chr1	16609643	16610004	7	14.16
chr1	19840067	19840473	8	10.94
chr1	19972946	19973588	9	16.73
chr1	20929142	20929433	10	15.97
chr1	21004688	21004998	11	12.98
chr1	23833808	23834451	12	16.6
chr1	24058336	24058985	13	21.75
chr1	29273928	29274452	14	22.01
chr1	34117485	34118242	15	23.29
chr1	34160554	34160986	16	14.94
chr1	34466363	34467033	17	20.29
chr1	36121662	36122323	18	34.12
chr1	36174759	36175160	19	25.07
chr1	36290012	36290454	20	12.86
chr1	36558062	36558456	21	30.03
chr1	36568232	36568907	22	22.85
chr1	36636890	36637576	23	10.37
chr1	36765956	36766553	24	11.9
chr1	37276899	37277400	25	72.8
chr1	37356649	37357179	26	9.75
chr1	38160733	38161073	27	9.15
chr1	39081836	39082633	28	11.17
chr1	39584102	39584758	29	15.88
chr1	39612662	39613297	30	21.92
chr1	39685431	39685928	31	11.4
chr1	39993237	39993698	32	17.41
chr1	40090409	40090876	33	18.37
chr1	41327420	41328406	34	35.67
chr1	41447076	41447633	35	10.07
chr1	42299077	42299861	36	15.93
chr1	42544814	42545162	37	10.71
chr1	42971925	42972321	38	25.58
chr1	43884725	43885164	39	20.2
chr1	44175473	44176287	40	16.52
chr1	44204239	44204843	41	10.34
chr1	45851709	45852061	42	23.2
chr1	50983958	50984624	43	22.02
chr1	51144697	51145052	44	16.45
chr1	51339451	51340032	45	9.77
chr1	51346361	51347231	46	25.18
chr1	51400926	51401360	47	18
chr1	52288769	52289126	48	22.19
chr1	52874636	52875539	49	9.37
chr1	53011946	53012324	50	14.72
chr1	53353597	53353979	51	12.69
chr1	55085601	55086367	52	12.65
chr1	57030182	57030693	53	14.09
chr1	58501954	58502646	54	10.43
chr1	59466427	59466823	55	14.03
chr1	60623868	60624421	56	9.26
chr1	60850644	60851012	57	13.4
chr1	62595217	62595897	58	18.43
chr1	62747652	62748057	59	15.3
chr1	62749257	62749645	60	25.85
chr1	62954904	62955725	61	26.24
chr1	62998024	62998382	62	8.14
chr1	63272452	63272717	63	17.46
chr1	63302995	63303684	64	7.56
chr1	64000013	64000365	65	20.72
chr1	64023387	64023914	66	8.31
chr1	64087378	64088313	67	23.52
chr1	64112965	64113801	68	16.24
chr1	64270449	64271094	69	12.73
chr1	64302195	64302891	70	15.27
chr1	64351840	64352297	71	15.37
chr1	64579133	64579763	72	17.82
chr1	65003466	65004273	73	18.96
chr1	65224720	65225379	74	16.24
chr1	71995823	71996398	75	17.9
chr1	72229628	72230067	76	19.16
chr1	72282936	72283272	77	9.89
chr1	72302047	72302433	78	9.12
chr1	72624134	72624531	79	29.08
chr1	72629410	72630240	80	18.77
chr1	72757678	72757931	81	21.12
chr1	72925558	72925900	82	22.66
chr1	74286823	74287293	83	24.27
chr1	74317814	74318598	84	31.9
chr1	74320732	74322014	85	13.63
chr1	74342095	74342772	86	11.91
chr1	74552299	74552985	87	17.2
chr1	74634680	74635179	88	10.02
chr1	74854770	74855266	89	17.01
chr1	74927451	74928277	90	30.73
chr1	75138972	75139352	91	14.35
chr1	75250796	75251360	92	13.46
chr1	75313299	75313860	93	30.83
chr1	75463876	75464567	94	16.58
chr1	75556106	75556791	95	22.37
chr1	78212346	78212595	96	10.53
chr1	78334511	78335304	97	25.53
chr1	78721011	78722080	98	28.79
chr1	78741852	78742157	99	8.79
chr1	79446683	79448165	100	12.72
chr1	79455534	79455993	101	14.5
chr1	79668498	79668782	102	18.26
chr1	82147468	82147787	103	9.85
chr1	82164736	82165560	104	25.39
chr1	82289141	82289956	105	13.98
chr1	82783982	82784310	106	9.19
chr1	87960694	87961098	107	14.38
chr1	88285871	88286192	108	18.55
chr1	88368875	88369319	109	8.06
chr1	88398184	88398733	110	32.7
chr1	90173500	90174275	111	8.17
chr1	90174633	90175205	112	19.8
chr1	90184089	90184564	113	16.31
chr1	91434881	91435618	114	14.04
chr1	93379870	93380757	115	13.93
chr1	94092019	94092611	116	9.48
chr1	94641423	94642114	117	18.06
chr1	94668895	94669525	118	15.76
chr1	95721410	95722029	119	9.57
chr1	99666265	99666941	120	18.01
chr1	108067332	108068400	121	21.4
chr1	108303737	108304123	122	10.87
chr1	108402675	108403386	123	11.02
chr1	108408195	108408517	124	10.55
chr1	121849684	121850318	125	16.5
chr1	121929648	121929867	126	37.7
chr1	123464261	123465079	127	19.79
chr1	124100499	124101028	128	9.4
chr1	129355706	129356126	129	6.61
chr1	129669881	129670837	130	7.44
chr1	129998969	129999785	131	28.94
chr1	130255533	130256408	132	18.61
chr1	130699868	130700603	133	14.07
chr1	133423185	133424016	134	11
chr1	133806610	133807183	135	49.29
chr1	134454454	134455276	136	8.4
chr1	134817958	134818819	137	15.52
chr1	134921438	134922099	138	29.35
chr1	135074086	135074496	139	24.56
chr1	135078380	135079543	140	19.57
chr1	135123434	135124137	141	24.08
chr1	135134345	135134712	142	16.58
chr1	135203370	135203711	143	18.28
chr1	135249900	135250532	144	10.94
chr1	135721611	135722701	145	14.07
chr1	137042722	137043116	146	11.62
chr1	137264807	137265290	147	12.05
chr1	137667544	137668347	148	29.61
chr1	137691116	137691634	149	13.19
chr1	140224773	140225201	150	6.98
chr1	140727979	140728207	151	9.84
chr1	140772390	140773558	152	8.62
chr1	141273444	141273845	153	12.95
chr1	145830227	145830583	154	13.48
chr1	152240269	152240788	155	15.24
chr1	153275153	153276015	156	12.71
chr1	153533651	153534361	157	10.3
chr1	153553121	153553550	158	28.58
chr1	153846146	153847003	159	20.01
chr1	154137707	154138468	160	24.85
chr1	154371991	154372513	161	18.16
chr1	154383463	154384318	162	33.24
chr1	154534218	154534627	163	22.95
chr1	154656927	154657407	164	17.5
chr1	154751528	154752180	165	13.4
chr1	154760487	154761220	166	14.44
chr1	154801836	154802301	167	17.57
chr1	154931477	154931793	168	15
chr1	154939071	154939660	169	17.14
chr1	154973447	154974412	170	17.16
chr1	155233767	155234102	171	13.07
chr1	155596352	155596732	172	13.09
chr1	155727567	155727996	173	28.16
chr1	156946386	156947257	174	25.74
chr1	157060152	157060702	175	17.79
chr1	157374071	157375173	176	26.42
chr1	157402885	157403390	177	10.45
chr1	157517836	157518212	178	34.9
chr1	157887855	157888366	179	14.04
chr1	157957990	157959345	180	15.18
chr1	158114354	158114795	181	16.14
chr1	158147614	158148134	182	29.63
chr1	158602656	158603131	183	20.76
chr1	158604428	158605230	184	18.16
chr1	158886360	158886792	185	13.53
chr1	159410173	159410857	186	15.94
chr1	159842278	159843296	187	35.51
chr1	160253539	160254051	188	7.55
chr1	162281622	162282534	189	13.51
chr1	162300686	162301158	190	11.2
chr1	163110583	163111148	191	26.29
chr1	163678224	163678850	192	37.36
chr1	163807261	163808266	193	14.78
chr1	163906569	163907125	194	19.82
chr1	164147581	164148059	195	17.15
chr1	164594741	164595839	196	7.13
chr1	165828531	165828992	197	39.18
chr1	165924870	165925271	198	25.52
chr1	166237196	166237642	199	10.5
chr1	166826262	166827476	200	20.85
chr1	166828855	166829527	201	10.53
chr1	166916106	166916666	202	34.79
chr1	166927762	166928123	203	6.99
chr1	166948920	166949351	204	11.3
chr1	166976718	166977826	205	27.65
chr1	167005425	167006411	206	27.98
chr1	167182229	167182805	207	15.05
chr1	167564769	167565337	208	16.8
chr1	167569695	167570269	209	15.31
chr1	167573126	167573442	210	18.38
chr1	167583699	167584180	211	38.38
chr1	167585089	167586144	212	25.14
chr1	167664784	167665201	213	12.58
chr1	168878066	168878582	214	45.92
chr1	169175302	169175588	215	7.63
chr1	169215224	169216097	216	37.28
chr1	169236672	169236932	217	21.63
chr1	169575109	169575526	218	6.59
chr1	170258403	170258599	219	8.12
chr1	171388963	171389929	220	37.42
chr1	171668010	171668568	221	7.59
chr1	171746480	171747770	222	15.62
chr1	171848149	171848459	223	18.82
chr1	171899335	171899787	224	31.49
chr1	172831750	172832163	225	43.49
chr1	173180269	173180785	226	47.47
chr1	173291347	173291796	227	22.83
chr1	174078120	174078385	228	30.74
chr1	174322200	174322710	229	21.42
chr1	174455398	174455862	230	24.99
chr1	175320077	175320592	231	7.76
chr1	176525259	176525529	232	10.04
chr1	177356643	177357618	233	13.58
chr1	177515515	177515850	234	11.63
chr1	177866444	177866955	235	14.19
chr1	178685370	178686022	236	9.26
chr1	178730945	178731438	237	51.37
chr1	178807949	178808319	238	71.05
chr1	179251876	179252578	239	20.63
chr1	179273373	179273692	240	28.67
chr1	180335602	180335855	241	8.74
chr1	181447237	181447700	242	9.98
chr1	181447974	181448282	243	39.55
chr1	181777594	181778216	244	18.32
chr1	181889236	181889806	245	16.07
chr1	182778282	182779117	246	12.85
chr1	182803956	182804512	247	11.94
chr1	182952296	182952699	248	13.87
chr1	183080650	183081256	249	45.12
chr1	183187131	183187350	250	11.87
chr1	184003701	184004172	251	8.3
chr1	184011858	184012483	252	28.23
chr1	184349595	184350156	253	27.5
chr1	184913278	184913995	254	40.08
chr1	186305922	186306415	255	19.89
chr1	186343426	186343885	256	33.37
chr1	186468589	186469554	257	22.81
chr1	188047175	188048236	258	15.05
chr1	188085445	188085787	259	11.7
chr1	188181844	188182573	260	24.17
chr1	189039030	189039470	261	22.95
chr1	189129949	189130322	262	13.2
chr1	191241011	191241453	263	18.14
chr1	191796769	191797181	264	15.91
chr1	192962252	192962619	265	14.35
chr1	193293913	193294903	266	29.02
chr1	193398615	193399839	267	20.73
chr1	193486029	193486529	268	10.91
chr1	193644796	193645555	269	53.99
chr1	193662992	193663899	270	48.32
chr1	193720703	193721707	271	22.59
chr1	193813725	193814309	272	26.05
chr1	193893750	193894978	273	17.46
chr1	193916808	193917185	274	18.33
chr1	194581750	194582298	275	9.24
chr1	194622411	194623247	276	31.56
chr1	194647901	194648316	277	13.11
chr1	194661140	194661522	278	19.45
chr1	196804232	196805140	279	18.28
chr10	4521280	4521615	280	11.52
chr10	5787146	5788023	281	20.79
chr10	6506110	6506697	282	19.16
chr10	6715311	6715793	283	13.85
chr10	6773237	6773941	284	10.83
chr10	6931337	6931614	285	12.58
chr10	7301862	7303266	286	9.33
chr10	7445328	7446180	287	38.6
chr10	7529709	7530064	288	11.94
chr10	8515247	8515457	289	7.29
chr10	8732701	8733032	290	12.02
chr10	9277314	9277957	291	20.37
chr10	9621131	9621869	292	24.13
chr10	11082054	11082550	293	12.52
chr10	12587752	12588138	294	13.46
chr10	12727996	12728357	295	10.35
chr10	13166550	13166939	296	7.88
chr10	16356898	16357251	297	20.04
chr10	16754701	16755171	298	14.75
chr10	17282780	17283007	299	9.98
chr10	20377557	20377997	300	9.46
chr10	20743025	20743561	301	11.42
chr10	21503412	21503948	302	11.84
chr10	21554676	21555091	303	36.27
chr10	21555359	21555717	304	15.42
chr10	21712211	21713093	305	10.77
chr10	22466067	22467033	306	42.6
chr10	23793231	23793515	307	6.57
chr10	24450715	24451757	308	38.89
chr10	24938979	24939352	309	19.03
chr10	28826697	28827092	310	58.71
chr10	30505876	30506256	311	34.47
chr10	33670927	33671345	312	34.03
chr10	34036458	34037167	313	32.31
chr10	36274999	36275693	314	12.04
chr10	36858882	36859219	315	13.92
chr10	38715285	38715995	316	17.64
chr10	39240280	39240483	317	7.98
chr10	39271622	39272583	318	24.74
chr10	39290698	39291175	319	16.92
chr10	39332696	39333544	320	10.09
chr10	40470721	40471498	321	19.56
chr10	40602866	40603547	322	13.07
chr10	41238154	41238686	323	25.76
chr10	41529493	41529814	324	13.1
chr10	41654481	41655027	325	32.26
chr10	41700512	41700994	326	16.67
chr10	41790523	41790995	327	28.87
chr10	41919293	41919675	328	43.12
chr10	42724011	42724591	329	59.47
chr10	42840911	42841503	330	23.71
chr10	42912199	42912669	331	12.05
chr10	43172024	43172538	332	16.26
chr10	44803845	44804187	333	11.77
chr10	45031288	45031820	334	40.64
chr10	45418820	45419103	335	20.43
chr10	53181220	53181628	336	11.1
chr10	55948297	55949032	337	22.14
chr10	57717905	57718330	338	13.25
chr10	57785585	57786024	339	40.73
chr10	59357592	59358014	340	14.24
chr10	59383170	59383811	341	7.27
chr10	59406283	59406848	342	31.26
chr10	59415241	59416168	343	28.43
chr10	59416390	59416787	344	17.97
chr10	59432467	59432927	345	29.16
chr10	59465460	59465861	346	35.51
chr10	60347882	60349092	347	25.32
chr10	60394837	60395289	348	29.34
chr10	60397088	60397625	349	10.49
chr10	60399357	60400140	350	16.22
chr10	60674562	60675004	351	7.5
chr10	60862241	60862748	352	18.34
chr10	60954719	60955054	353	10.75
chr10	61723909	61724306	354	15.94
chr10	61758639	61759130	355	23.82
chr10	61762596	61763671	356	12.99
chr10	62005757	62006459	357	17.09
chr10	62255660	62256044	358	12.79
chr10	62845156	62845519	359	9.11
chr10	66466452	66467234	360	17.29
chr10	66558704	66559034	361	12.38
chr10	66648280	66648814	362	15.09
chr10	66774232	66774741	363	29.93
chr10	67240908	67241883	364	20.79
chr10	67599221	67599709	365	13.15
chr10	67618817	67619425	366	9.53
chr10	68997457	68998050	367	23.56
chr10	69042308	69042767	368	15.91
chr10	69308462	69308901	369	18.58
chr10	69321508	69322130	370	10.92
chr10	69557561	69558680	371	10.55
chr10	69754611	69755088	372	44.46
chr10	69822240	69823136	373	12.8
chr10	69983608	69983934	374	10.48
chr10	70681095	70681442	375	11.8
chr10	70942754	70943069	376	22.39
chr10	74495077	74495275	377	8.02
chr10	74516905	74517930	378	40.36
chr10	74632554	74633871	379	12.67
chr10	74675201	74675548	380	7.84
chr10	74780562	74780984	381	16.16
chr10	74799295	74799753	382	24.54
chr10	74869541	74870094	383	7.29
chr10	74902089	74902529	384	35.69
chr10	74980329	74980756	385	13.65
chr10	75010598	75011570	386	21.22
chr10	75335403	75336196	387	30.32
chr10	75400789	75401359	388	15.04
chr10	76336431	76337011	389	19.97
chr10	76366447	76367028	390	10.02
chr10	76460340	76460891	391	12.3
chr10	76467761	76468255	392	14.58
chr10	76470301	76471410	393	25.27
chr10	76484103	76484544	394	10.09
chr10	76683636	76684642	395	10.93
chr10	77326997	77327503	396	30.54
chr10	77358157	77358695	397	23.1
chr10	77375094	77375683	398	30.72
chr10	77440810	77441320	399	24.93
chr10	77472226	77472955	400	21.33
chr10	77490483	77491546	401	60.29
chr10	77622650	77623116	402	33.33
chr10	77786161	77786875	403	9.31
chr10	77800883	77801345	404	22.91
chr10	78037543	78038250	405	17.35
chr10	79061145	79061815	406	32.92
chr10	79217313	79217738	407	31.25
chr10	79346374	79346666	408	7.14
chr10	79363468	79363997	409	19.75
chr10	79446188	79446742	410	9.6
chr10	79458934	79459535	411	9.11
chr10	79502531	79503190	412	20.9
chr10	79533604	79534231	413	19.47
chr10	79604395	79605405	414	20.9
chr10	79622863	79623940	415	12.45
chr10	79688913	79689366	416	12.78
chr10	79988871	79989227	417	7.43
chr10	80053104	80053683	418	14.05
chr10	80205021	80205732	419	27.79
chr10	80288865	80289734	420	26.31
chr10	80363453	80363761	421	20.62
chr10	80639151	80639609	422	22.81
chr10	80750590	80750898	423	9.83
chr10	81111539	81111838	424	16.94
chr10	81590434	81590945	425	59.87
chr10	82129195	82129450	426	13.34
chr10	82159452	82160333	427	10.68
chr10	82287249	82287790	428	24.26
chr10	82448562	82448935	429	15.65
chr10	82542893	82543269	430	18.96
chr10	82646269	82646955	431	12.06
chr10	82806432	82806927	432	9.52
chr10	82822612	82823181	433	50.16
chr10	83115075	83115688	434	13.32
chr10	83850063	83850552	435	16.8
chr10	83913251	83913785	436	12.6
chr10	84379800	84380379	437	34.5
chr10	84648125	84648418	438	9.83
chr10	85954637	85955105	439	23.59
chr10	86241212	86241656	440	11.68
chr10	87767007	87767360	441	28.6
chr10	88659645	88660042	442	5.38
chr10	92795175	92795461	443	12.84
chr10	92828548	92828997	444	12.45
chr10	92888204	92888831	445	18.14
chr10	92895270	92895617	446	21.21
chr10	92914944	92915169	447	7.54
chr10	93498500	93498878	448	11.4
chr10	93766639	93767597	449	88.97
chr10	93774140	93774639	450	9.72
chr10	93775302	93775627	451	11.7
chr10	93943539	93943869	452	9.1
chr10	94829262	94830156	453	7
chr10	95356771	95357989	454	11.69
chr10	96808063	96808459	455	18.98
chr10	98663478	98663873	456	10.86
chr10	98666284	98666810	457	13.66
chr10	99023936	99024483	458	13.42
chr10	102604247	102604476	459	8.55
chr10	106910586	106910974	460	21.04
chr10	107609994	107610569	461	22.65
chr10	108489916	108490592	462	7.59
chr10	110896098	110896550	463	11.8
chr10	111362649	111363193	464	21.56
chr10	113221380	113221778	465	14.17
chr10	114608524	114609335	466	22.77
chr10	114612682	114612992	467	12.55
chr10	115019016	115019380	468	13.78
chr10	115323460	115323928	469	14.24
chr10	115704560	115705397	470	11.45
chr10	116346041	116346711	471	14.32
chr10	116611507	116612055	472	23.81
chr10	116712747	116713437	473	12.43
chr10	116813993	116814297	474	9.18
chr10	117229561	117230071	475	9.45
chr10	117384469	117385231	476	15.4
chr10	117540208	117540582	477	22.38
chr10	117686133	117686649	478	26.82
chr10	119051795	119052455	479	27.02
chr10	119160605	119161195	480	23.91
chr10	119172147	119172571	481	8.08
chr10	119230497	119230722	482	18.63
chr10	119597487	119597975	483	19.53
chr10	120129885	120130204	484	5.94
chr10	120138873	120139275	485	57.64
chr10	120338500	120339172	486	21.96
chr10	120693528	120693907	487	12.33
chr10	121534028	121534966	488	29.6
chr10	122252209	122252924	489	11.08
chr10	122320558	122321994	490	32.26
chr10	122424588	122425473	491	20.13
chr10	126394503	126395197	492	14.88
chr10	126507137	126507491	493	19.24
chr10	126559726	126560072	494	27.57
chr10	126727432	126728146	495	37.04
chr10	126748617	126749278	496	25.63
chr10	126857707	126858909	497	11.46
chr10	126946050	126946690	498	17.27
chr10	127527777	127528315	499	15.17
chr10	127533435	127533851	500	17.76
chr10	127623030	127623342	501	33.94
chr10	127631079	127631575	502	36.25
chr10	127648492	127649029	503	9.17
chr10	127669451	127670306	504	33.41
chr10	127774370	127775117	505	9.35
chr10	127963036	127963871	506	17.43
chr10	127973010	127973832	507	23.62
chr10	127984303	127985596	508	15.16
chr10	127985772	127986550	509	10.64
chr10	128133035	128133909	510	10.27
chr10	128182259	128182628	511	13.11
chr10	129978990	129979597	512	16.38
chr11	3047484	3047807	513	20.81
chr11	3273978	3274497	514	10.51
chr11	3863795	3864094	515	21.08
chr11	4520450	4520907	516	27.63
chr11	4853788	4854332	517	11.52
chr11	4998867	4999190	518	14.92
chr11	4999741	5000657	519	11.21
chr11	5385205	5385498	520	15.67
chr11	6265955	6266409	521	15.43
chr11	6379816	6380505	522	25.6
chr11	6389693	6390444	523	20.99
chr11	6505006	6505837	524	23.68
chr11	6505906	6506361	525	23.06
chr11	11354954	11355317	526	7.8
chr11	11708679	11709347	527	17.11
chr11	11873326	11873666	528	12.81
chr11	16709010	16709390	529	8.26
chr11	17111409	17112088	530	17.88
chr11	17132676	17133281	531	26.3
chr11	18254802	18255377	532	11.21
chr11	19088790	19089229	533	14.68
chr11	19823800	19824527	534	11.47
chr11	19878995	19879648	535	32.26
chr11	20345324	20346327	536	25.82
chr11	20814088	20814390	537	10.95
chr11	20932765	20933460	538	9.92
chr11	22487272	22488095	539	9.31
chr11	22510311	22510862	540	8.92
chr11	22747078	22747325	541	5.9
chr11	29593797	29594567	542	11.7
chr11	29715452	29715792	543	7.04
chr11	29785213	29785580	544	20.12
chr11	29925669	29926404	545	14.68
chr11	29957308	29957782	546	8.9
chr11	31634167	31634704	547	15.4
chr11	31659519	31660723	548	28.07
chr11	31770579	31771337	549	17.05
chr11	31841017	31841869	550	24.62
chr11	31927537	31928039	551	26.35
chr11	32041139	32042207	552	16.72
chr11	32062026	32062741	553	24.88
chr11	32240684	32241530	554	10.57
chr11	33070307	33070821	555	13.74
chr11	33412715	33413166	556	11.03
chr11	34049342	34049673	557	11.28
chr11	34136238	34136855	558	14.4
chr11	34646950	34647335	559	59.19
chr11	35267588	35268559	560	30.74
chr11	35318989	35319873	561	43.93
chr11	35409500	35409893	562	10.68
chr11	35415199	35415752	563	44.42
chr11	35483667	35485014	564	13.53
chr11	35678377	35678904	565	22.96
chr11	35799134	35799720	566	19
chr11	35812819	35814001	567	25.84
chr11	40740719	40740953	568	14.63
chr11	43019537	43020701	569	15.73
chr11	43382757	43383954	570	14.7
chr11	43447657	43447942	571	9.24
chr11	43455816	43457144	572	14.94
chr11	43494899	43495568	573	11.03
chr11	44238776	44239341	574	11.07
chr11	45768634	45769181	575	16.28
chr11	48613130	48613995	576	20.2
chr11	48671256	48671776	577	14.21
chr11	49001025	49001497	578	8.04
chr11	49074616	49075006	579	21.59
chr11	49463672	49464331	580	14.86
chr11	49943915	49944854	581	8.11
chr11	50064907	50065797	582	6.48
chr11	50182841	50183596	583	13.86
chr11	50641208	50641513	584	7.91
chr11	50846461	50846913	585	26.55
chr11	51033785	51034165	586	15.61
chr11	51090330	51090556	587	6.61
chr11	51367854	51368329	588	7.12
chr11	51429082	51429562	589	20.17
chr11	51569855	51570667	590	24.65
chr11	51687636	51688264	591	15.95
chr11	51756368	51756974	592	25.66
chr11	51780820	51781706	593	24.82
chr11	52701773	52702198	594	11.68
chr11	53113637	53114433	595	15.8
chr11	53137930	53138595	596	7.81
chr11	53243850	53245286	597	37.34
chr11	53269976	53270342	598	11.05
chr11	53321807	53322465	599	9.88
chr11	53572471	53573595	600	11.2
chr11	54978206	54978699	601	16.11
chr11	55021445	55022042	602	15.33
chr11	55237351	55237973	603	12.86
chr11	55332270	55332986	604	15.89
chr11	57614603	57615114	605	18.58
chr11	57654519	57655215	606	23.23
chr11	57775518	57776180	607	13.74
chr11	57939980	57940576	608	17.43
chr11	58115908	58116546	609	15.28
chr11	58143498	58144159	610	36.9
chr11	58761952	58762369	611	23.24
chr11	59622346	59622775	612	10.22
chr11	59623092	59623500	613	14.37
chr11	59624843	59625250	614	11.71
chr11	60008523	60008862	615	8.99
chr11	60350357	60351316	616	34.59
chr11	60541997	60542457	617	18.6
chr11	61472126	61472463	618	7.08
chr11	61488103	61488521	619	13.32
chr11	62364588	62365110	620	25.36
chr11	62389050	62390319	621	39.45
chr11	62544907	62545821	622	10.65
chr11	62633669	62634391	623	12.11
chr11	62834124	62834445	624	16.06
chr11	62939346	62939855	625	13.86
chr11	62943232	62943802	626	11.1
chr11	63231701	63233795	627	42.25
chr11	63731016	63731442	628	9.81
chr11	66796325	66796681	629	24.92
chr11	66894737	66895092	630	14.99
chr11	68714759	68715201	631	20.03
chr11	68761027	68761434	632	17.1
chr11	68855133	68855431	633	21.36
chr11	68932024	68932738	634	13.4
chr11	69006436	69006639	635	17.61
chr11	69071846	69072452	636	10.39
chr11	69393547	69395175	637	16.54
chr11	69714656	69715312	638	10.67
chr11	69727178	69727580	639	14.68
chr11	69834757	69835553	640	16
chr11	69842904	69843552	641	13.01
chr11	70442086	70442312	642	13.13
chr11	70657853	70658316	643	24.97
chr11	72242858	72243239	644	16.7
chr11	72387432	72387884	645	8.45
chr11	74369411	74370136	646	10.62
chr11	74370621	74371742	647	20.83
chr11	75273527	75274064	648	11.68
chr11	75467272	75468016	649	9.43
chr11	76141319	76142376	650	14.03
chr11	76457949	76459772	651	22.23
chr11	76660425	76660738	652	14.89
chr11	77304679	77305309	653	12.54
chr11	77443195	77444194	654	13.88
chr11	77793797	77794118	655	17.48
chr11	78136466	78136876	656	23.55
chr11	78141640	78142063	657	22.06
chr11	78268907	78269425	658	7.47
chr11	79107324	79107867	659	7.52
chr11	80165307	80165625	660	11.91
chr11	80191303	80191938	661	12.08
chr11	83256306	83256831	662	21.3
chr11	83566978	83567518	663	16.78
chr11	84327175	84327466	664	26.95
chr11	84338892	84339591	665	28.2
chr11	84729643	84730203	666	54.53
chr11	85166165	85166761	667	20.18
chr11	85574709	85575279	668	12.56
chr11	85631821	85632167	669	16.59
chr11	85662546	85662945	670	10.59
chr11	86496957	86497803	671	11.75
chr11	86733467	86734434	672	7.28
chr11	86922164	86923034	673	38.81
chr11	87953336	87953910	674	21.71
chr11	88115196	88115451	675	9.66
chr11	88273620	88274197	676	13.93
chr11	88336970	88337877	677	8.85
chr11	88466390	88467087	678	16.55
chr11	88816415	88817155	679	34.93
chr11	90278978	90279463	680	11.48
chr11	90432070	90432511	681	14.37
chr11	94097322	94097973	682	13.66
chr11	94183475	94183849	683	16.17
chr11	94290298	94291061	684	10.42
chr11	94968046	94968463	685	32.5
chr11	95422649	95423287	686	12.7
chr11	95438550	95439112	687	10.22
chr11	95446327	95447017	688	6.62
chr11	95508097	95509544	689	10.75
chr11	95527863	95528721	690	24.39
chr11	96436496	96436873	691	22.15
chr11	96838931	96839657	692	26.56
chr11	96891015	96891689	693	17.43
chr11	97330259	97330571	694	8.59
chr11	97423800	97424429	695	10.95
chr11	97483755	97484155	696	17.61
chr11	97564434	97564965	697	20.98
chr11	97662429	97663325	698	20.91
chr11	97701976	97702301	699	6.81
chr11	97811384	97811688	700	9.39
chr11	97848885	97849504	701	17.41
chr11	97936669	97937181	702	18.62
chr11	98233772	98234042	703	13.62
chr11	98299946	98300482	704	11.79
chr11	98543425	98543961	705	22.39
chr11	98592289	98592913	706	16.91
chr11	98601568	98602783	707	23.17
chr11	98636311	98637264	708	22.08
chr11	98647231	98647816	709	9.75
chr11	98647947	98648636	710	22.43
chr11	98720276	98720685	711	27.53
chr11	98724252	98725114	712	23.79
chr11	98768923	98769527	713	13.43
chr11	98784191	98784973	714	14.96
chr11	98803145	98803658	715	13.57
chr11	98993277	98994087	716	39.3
chr11	100225372	100225885	717	17.73
chr11	100287096	100287767	718	47.06
chr11	100379142	100379992	719	15.85
chr11	100380503	100381004	720	6.74
chr11	100622646	100623987	721	20.42
chr11	100632346	100632666	722	9.79
chr11	100800683	100801037	723	24.39
chr11	100818701	100819003	724	8.23
chr11	100981112	100981920	725	18.43
chr11	101092879	101093555	726	15.1
chr11	101140148	101140726	727	49.22
chr11	101326269	101327045	728	12.12
chr11	101488003	101488371	729	16.7
chr11	101633571	101634168	730	10.63
chr11	101652307	101652605	731	13.31
chr11	101674703	101675266	732	15.78
chr11	101781087	101781421	733	18.04
chr11	101963490	101964023	734	12.73
chr11	102080063	102080350	735	15.89
chr11	102128519	102129100	736	14.38
chr11	102180749	102181021	737	11.78
chr11	102181195	102181721	738	11.72
chr11	102244678	102245232	739	18.56
chr11	102269697	102270282	740	14.48
chr11	102273013	102273321	741	34.45
chr11	102291401	102291771	742	11.85
chr11	102295534	102296006	743	13.29
chr11	102417238	102417684	744	25.28
chr11	102742338	102742870	745	15.5
chr11	102799184	102799748	746	15.04
chr11	102864542	102865056	747	10.27
chr11	102977410	102977821	748	20.72
chr11	103243160	103244382	749	14.25
chr11	103527329	103527886	750	28.24
chr11	103550895	103551651	751	7.78
chr11	103559094	103559737	752	12.33
chr11	103651077	103651930	753	18.63
chr11	103827508	103828407	754	47.68
chr11	103957819	103958170	755	11.28
chr11	103967092	103968340	756	22.37
chr11	103979570	103979983	757	21.12
chr11	103992437	103993665	758	12.4
chr11	104032818	104033094	759	17.99
chr11	104056885	104057524	760	17.9
chr11	104067657	104068554	761	17.48
chr11	104093870	104094685	762	27.11
chr11	104097551	104098018	763	9.62
chr11	104330739	104331518	764	19.9
chr11	104981720	104982515	765	23.84
chr11	105874163	105874572	766	8.55
chr11	105874763	105875351	767	9.92
chr11	106077582	106078510	768	30.8
chr11	106150745	106151236	769	15.94
chr11	106362717	106363226	770	25.35
chr11	106433295	106433932	771	19.83
chr11	106474374	106475287	772	12.51
chr11	106521055	106521485	773	10.43
chr11	106985604	106985943	774	15.86
chr11	107137172	107137686	775	9.56
chr11	107855743	107856345	776	10.07
chr11	107889507	107890131	777	12.11
chr11	108159693	108160069	778	17.35
chr11	109205412	109205743	779	9.73
chr11	109473152	109473970	780	16.22
chr11	109497180	109497872	781	37.29
chr11	112070681	112071247	782	8
chr11	112206556	112207272	783	16.36
chr11	112642810	112643587	784	24.72
chr11	112707333	112707875	785	15.66
chr11	113159038	113159624	786	92.87
chr11	113160501	113161344	787	8.58
chr11	113213257	113214509	788	26.14
chr11	113254795	113255713	789	12.56
chr11	113377239	113377874	790	18.87
chr11	113406930	113407814	791	17.84
chr11	113472907	113473919	792	27.9
chr11	114497765	114498003	793	9.56
chr11	115158278	115159570	794	11.34
chr11	115235138	115235886	795	43.69
chr11	115242579	115243250	796	21.97
chr11	115334794	115335652	797	33.77
chr11	115336402	115337319	798	36.56
chr11	115397831	115398612	799	13.4
chr11	115675039	115676217	800	16.46
chr11	115879382	115879737	801	13.26
chr11	115885671	115885967	802	26.81
chr11	115938807	115939511	803	25.4
chr11	115948178	115949295	804	11.04
chr11	115965256	115965912	805	14.63
chr11	116028680	116029786	806	40.28
chr11	116248163	116248526	807	13.05
chr11	116532450	116533275	808	24.62
chr11	116674045	116674560	809	18.63
chr11	116918111	116918550	810	36.99
chr11	116921261	116922080	811	16.65
chr11	117227716	117228326	812	21.81
chr11	117246190	117246656	813	19.4
chr11	117314180	117314707	814	28.96
chr11	117315317	117316235	815	14.74
chr11	117382849	117384891	816	25.17
chr11	117489547	117490296	817	12.62
chr11	117743885	117744198	818	9.72
chr11	117751895	117752278	819	15.07
chr11	117801469	117801798	820	9.06
chr11	117847883	117848233	821	12.8
chr11	117964039	117964503	822	18.5
chr11	118074095	118074497	823	14.63
chr11	118203773	118204219	824	22.62
chr11	118207139	118207821	825	9.73
chr11	118240978	118241415	826	12.63
chr11	118280275	118280629	827	12.95
chr11	118735152	118737072	828	36.57
chr11	118752697	118753342	829	23.9
chr11	118858476	118858798	830	14.91
chr11	118887563	118887918	831	16.53
chr11	118956078	118957591	832	14.31
chr11	119013054	119014047	833	32.56
chr11	119042085	119042453	834	15.88
chr11	119576761	119577219	835	10.44
chr11	119607406	119607824	836	10.21
chr11	119678259	119679121	837	15.23
chr11	119744966	119745350	838	8.11
chr11	119850278	119851083	839	22.2
chr11	119912208	119913173	840	25.22
chr11	120109329	120110005	841	42.86
chr11	120129088	120129277	842	13.66
chr11	120218868	120219680	843	30.18
chr11	120371956	120372367	844	19.7
chr11	120766780	120767295	845	22.68
chr11	120851131	120851796	846	16.46
chr11	120865726	120866173	847	8.53
chr11	120902456	120902978	848	15.27
chr11	121312764	121313431	849	50.21
chr12	3234864	3235557	850	12.58
chr12	3779532	3780052	851	17.97
chr12	3868581	3869429	852	14.6
chr12	3887981	3888231	853	25.76
chr12	4392660	4392986	854	12.52
chr12	4555516	4555790	855	7.29
chr12	4726914	4727611	856	15.27
chr12	5148844	5149450	857	15.62
chr12	5357203	5358231	858	34.14
chr12	8066482	8066764	859	13.68
chr12	8494535	8495198	860	14.69
chr12	8527970	8528554	861	12.69
chr12	8882347	8882694	862	9.63
chr12	12629700	12630211	863	15.49
chr12	12707748	12708892	864	16.6
chr12	13124648	13124983	865	17.91
chr12	15527637	15528115	866	15.88
chr12	15807136	15808037	867	23.58
chr12	16641283	16641541	868	16.54
chr12	16847605	16848139	869	19.52
chr12	17028564	17028852	870	7.84
chr12	21292048	21292323	871	31.39
chr12	25177851	25178160	872	10.15
chr12	25336443	25337228	873	10.89
chr12	25659569	25660255	874	17.08
chr12	27320097	27321002	875	25.67
chr12	27568927	27569477	876	16.59
chr12	27767994	27768344	877	20.49
chr12	28342078	28342743	878	12.2
chr12	29274267	29274531	879	14.29
chr12	29334149	29334605	880	43.69
chr12	29360362	29360596	881	20.4
chr12	29489862	29490476	882	40.02
chr12	29733550	29734443	883	31.02
chr12	29768399	29769085	884	16.73
chr12	29901966	29902150	885	8.03
chr12	29975637	29976524	886	24.87
chr12	30212033	30212633	887	30.09
chr12	30215218	30215555	888	14.82
chr12	30619644	30620254	889	22.47
chr12	32059544	32059937	890	53.58
chr12	32061246	32061507	891	11.19
chr12	32218275	32218640	892	16.3
chr12	32753280	32753816	893	7.17
chr12	33582410	33582728	894	13.66
chr12	34114331	34114563	895	19.87
chr12	36768112	36768693	896	20.36
chr12	40724700	40724993	897	9.55
chr12	40743547	40744027	898	11.65
chr12	40764806	40765232	899	11.94
chr12	41064706	41065261	900	72.98
chr12	41222941	41223388	901	17
chr12	43378478	43378896	902	25.94
chr12	45298917	45299213	903	13.93
chr12	53198654	53198918	904	9.36
chr12	54396654	54397013	905	12.96
chr12	55009575	55010270	906	17.93
chr12	55935935	55936439	907	6.59
chr12	56539364	56540165	908	33.27
chr12	56546993	56548586	909	13.36
chr12	56599848	56600489	910	85.39
chr12	57505719	57506124	911	31.09
chr12	70299213	70299644	912	12.27
chr12	71932072	71932513	913	11.08
chr12	72116419	72117157	914	17.86
chr12	72931532	72932199	915	32.61
chr12	72956470	72957617	916	18.71
chr12	74210921	74211506	917	8.54
chr12	77750885	77751355	918	12.62
chr12	78063122	78063511	919	28.77
chr12	79200910	79201266	920	24.2
chr12	80292727	80293337	921	12.15
chr12	80294419	80294738	922	13.28
chr12	80397001	80397430	923	16.6
chr12	80398089	80398574	924	13.85
chr12	80960261	80961555	925	17.15
chr12	81026054	81026752	926	12.09
chr12	81141231	81141955	927	29.43
chr12	81248162	81248748	928	17.15
chr12	81888520	81889033	929	6.84
chr12	81996196	81996477	930	12.11
chr12	82720422	82720685	931	20.37
chr12	82897563	82898047	932	16.59
chr12	82907634	82908234	933	17.41
chr12	83016544	83017007	934	23.07
chr12	83440261	83440990	935	35
chr12	83571720	83572409	936	17.54
chr12	84118137	84118593	937	11.82
chr12	84429544	84430331	938	24.29
chr12	84972885	84973379	939	11.14
chr12	85111796	85112088	940	20.7
chr12	85262773	85263668	941	18.75
chr12	85371919	85372317	942	14.2
chr12	85516675	85517111	943	13.32
chr12	85702345	85703345	944	32.97
chr12	85886845	85887327	945	11.22
chr12	86125422	86125768	946	18.38
chr12	86142681	86143106	947	10.17
chr12	86311560	86311930	948	28.25
chr12	86492145	86492688	949	23.72
chr12	86796448	86797269	950	19.18
chr12	87165292	87166232	951	26.11
chr12	87367669	87368255	952	10.27
chr12	87398003	87398416	953	28.67
chr12	88136340	88136873	954	44.17
chr12	88164437	88166671	955	23.77
chr12	88167566	88168242	956	20.98
chr12	88177536	88177961	957	8.54
chr12	88252305	88253019	958	46.21
chr12	88324986	88325550	959	16.48
chr12	88393726	88394266	960	13.06
chr12	88606983	88607897	961	23.54
chr12	88812855	88813441	962	23.75
chr12	92651307	92651739	963	13.72
chr12	92922606	92923301	964	23.07
chr12	92923499	92923905	965	14.43
chr12	92986753	92987102	966	16.15
chr12	93087525	93087990	967	23.84
chr12	100158327	100158945	968	8.19
chr12	100195577	100196024	969	14.57
chr12	100211339	100212018	970	8.51
chr12	100232701	100233210	971	30.26
chr12	100288163	100289259	972	22.76
chr12	100615090	100616025	973	15.49
chr12	100631633	100632223	974	19.28
chr12	100802494	100802848	975	14.9
chr12	101397737	101398143	976	22.62
chr12	101440028	101440482	977	17.48
chr12	101575472	101576687	978	22.93
chr12	102087533	102087992	979	13.76
chr12	102136527	102136863	980	13.53
chr12	104302963	104303612	981	20.49
chr12	104440915	104441472	982	14.87
chr12	104452055	104452753	983	12.42
chr12	104563728	104564601	984	12.42
chr12	104584487	104585156	985	23.72
chr12	106202767	106203835	986	13.99
chr12	106221670	106222698	987	25.23
chr12	106230591	106231462	988	9.78
chr12	106257643	106258247	989	12.44
chr12	106738714	106739464	990	21.74
chr12	106761201	106761981	991	9.81
chr12	106769892	106770711	992	10.99
chr12	107142612	107143466	993	10.51
chr12	109531245	109531509	994	11.87
chr12	109571761	109572429	995	12.76
chr12	109785498	109785979	996	10.52
chr12	109817181	109818151	997	22.79
chr12	110141188	110141529	998	16.37
chr12	110215402	110215976	999	7.65
chr12	110612428	110613068	1000	18.52
chr12	110649592	110650057	1001	15.13
chr12	111838651	111839562	1002	14.73
chr12	112174427	112174822	1003	13.35
chr12	112245972	112246313	1004	20.12
chr12	112663555	112663810	1005	16.76
chr12	113459828	113460817	1006	14.18
chr12	113514973	113516031	1007	34.34
chr12	113882530	113882745	1008	13.97
chr12	114136128	114136463	1009	17.53
chr12	114458649	114459008	1010	14.95
chr12	114460261	114460779	1011	25.66
chr12	117754443	117755008	1012	17.62
chr12	118623777	118624125	1013	26.75
chr12	118989634	118990539	1014	24.76
chr13	4608420	4608777	1015	11.48
chr13	6546482	6547498	1016	23.17
chr13	6646545	6647041	1017	15.23
chr13	8793031	8793631	1018	7.46
chr13	8884638	8885669	1019	9.43
chr13	9190144	9191214	1020	41.54
chr13	11655643	11656282	1021	15.24
chr13	12432664	12433516	1022	11.25
chr13	14131510	14132154	1023	32.24
chr13	14155475	14155832	1024	15.23
chr13	21250719	21251008	1025	14.35
chr13	21325805	21326516	1026	19.9
chr13	21824949	21825731	1027	14.84
chr13	21825920	21826867	1028	63.63
chr13	21904014	21904376	1029	21.52
chr13	22010812	22011380	1030	23.31
chr13	22120437	22121064	1031	24.83
chr13	23524400	23524880	1032	8.27
chr13	23851818	23852169	1033	16.29
chr13	24891789	24892395	1034	9.57
chr13	28511818	28512207	1035	14.28
chr13	28873496	28874185	1036	6.16
chr13	29550321	29550694	1037	26.16
chr13	29719094	29719882	1038	10.68
chr13	29947246	29947729	1039	25.74
chr13	30547205	30547662	1040	6.1
chr13	30622618	30623019	1041	17.22
chr13	32404608	32404880	1042	17.98
chr13	34180628	34181254	1043	14.11
chr13	34222782	34224077	1044	39.41
chr13	34853944	34854511	1045	16.42
chr13	37543755	37544706	1046	23.52
chr13	38038614	38039051	1047	11.95
chr13	43365267	43365772	1048	17.13
chr13	43834940	43835592	1049	7.69
chr13	43870208	43870723	1050	9.01
chr13	43959680	43960722	1051	10.39
chr13	44355899	44357056	1052	12.32
chr13	44416494	44417332	1053	12.97
chr13	44934924	44935554	1054	35.86
chr13	44935845	44936158	1055	17.42
chr13	45097669	45097967	1056	12.56
chr13	45179144	45179481	1057	17.33
chr13	47430924	47431819	1058	14.96
chr13	48608757	48608982	1059	7.96
chr13	48734940	48735387	1060	16.96
chr13	49402161	49402959	1061	10.73
chr13	49476403	49477017	1062	8.36
chr13	49777201	49777832	1063	5.79
chr13	51513326	51514299	1064	8.75
chr13	51872921	51873798	1065	22.17
chr13	51911161	51911867	1066	14.16
chr13	51937257	51937758	1067	9.91
chr13	51948718	51949139	1068	14.13
chr13	52987548	52987985	1069	8.77
chr13	53772862	53773395	1070	13.57
chr13	54399240	54399945	1071	17.03
chr13	54406761	54408502	1072	11.76
chr13	54429972	54430401	1073	10.58
chr13	54891425	54891736	1074	17.86
chr13	54898771	54899242	1075	14.59
chr13	54906907	54907075	1076	15.67
chr13	55506727	55507381	1077	12.95
chr13	55545810	55546357	1078	23.53
chr13	55694223	55694594	1079	35.58
chr13	55999123	55999531	1080	21.87
chr13	56105106	56106017	1081	18.67
chr13	56205091	56205444	1082	7.17
chr13	56683329	56683599	1083	11.18
chr13	56759334	56759756	1084	7.35
chr13	57162165	57162827	1085	8.38
chr13	58230534	58231634	1086	13.85
chr13	60211775	60212194	1087	15.37
chr13	60344865	60345316	1088	9.92
chr13	60387957	60388782	1089	15.98
chr13	60781858	60782680	1090	13.94
chr13	60845500	60845867	1091	34.32
chr13	60927419	60927734	1092	14.76
chr13	60998641	60999375	1093	11.89
chr13	61037806	61038271	1094	14.6
chr13	63027873	63028281	1095	20.66
chr13	63213995	63214903	1096	17.51
chr13	63220090	63220794	1097	6.48
chr13	63433911	63434272	1098	29.02
chr13	63438657	63439303	1099	9.42
chr13	63531602	63532180	1100	11.47
chr13	67209470	67210335	1101	19.32
chr13	67295305	67295844	1102	33.23
chr13	69683821	69684273	1103	8.66
chr13	69750393	69751000	1104	34.27
chr13	69794047	69794657	1105	28.1
chr13	69948619	69948941	1106	14.15
chr13	74701259	74701705	1107	11.4
chr13	74754471	74755532	1108	17.54
chr13	81796317	81797047	1109	27.24
chr13	90151787	90152186	1110	10.84
chr13	90228497	90229595	1111	12.4
chr13	91062110	91062834	1112	17.16
chr13	91107191	91107447	1113	20.33
chr13	91278520	91278990	1114	7.82
chr13	91345862	91346387	1115	34.06
chr13	91451031	91451386	1116	11.29
chr13	91600622	91600921	1117	31.22
chr13	91947806	91948341	1118	12.66
chr13	92055570	92056507	1119	17.85
chr13	92811368	92812114	1120	9.53
chr13	92868174	92868767	1121	6.4
chr13	93253730	93254189	1122	27.64
chr13	95055544	95056133	1123	14.79
chr13	95639503	95639749	1124	14.66
chr13	95745962	95746380	1125	31.1
chr13	96362341	96362917	1126	18.64
chr13	96441168	96441805	1127	23.1
chr13	96743109	96743588	1128	36.02
chr13	96780767	96781433	1129	47.93
chr13	96899402	96900452	1130	47.93
chr13	96900704	96901763	1131	32.37
chr13	96902808	96904262	1132	12.47
chr13	97204832	97205358	1133	22.26
chr13	97475963	97476235	1134	23.79
chr13	97741569	97742199	1135	40.08
chr13	97907559	97908032	1136	12.62
chr13	97975020	97975494	1137	27.29
chr13	98004781	98005309	1138	11.14
chr13	98008963	98009889	1139	23.05
chr13	98126711	98127209	1140	21.06
chr13	98154275	98155305	1141	17.81
chr13	98160523	98160929	1142	22.7
chr13	98178212	98178657	1143	16.69
chr13	98182183	98182442	1144	9.3
chr13	98204836	98205114	1145	10.28
chr13	98376772	98377739	1146	7.41
chr13	98595362	98596181	1147	17.19
chr13	98707550	98708194	1148	45.71
chr13	98708695	98709250	1149	37.05
chr13	98831853	98833251	1150	15.62
chr13	98992707	98993261	1151	22.75
chr13	99010137	99010449	1152	9.78
chr13	99066041	99066282	1153	7.55
chr13	99078083	99078930	1154	14.84
chr13	99087222	99087693	1155	17.09
chr13	99208016	99208526	1156	10.41
chr13	99304105	99304503	1157	10.36
chr13	99457845	99458511	1158	22.19
chr13	99637844	99638101	1159	19.14
chr13	99714665	99715221	1160	18.1
chr13	99863036	99863932	1161	50.7
chr13	99868862	99869767	1162	22.38
chr13	100114197	100114611	1163	13.79
chr13	100145514	100146017	1164	17.72
chr13	100154754	100155361	1165	37.93
chr13	100183854	100184654	1166	20.03
chr13	100206981	100207392	1167	12.99
chr13	100222376	100222994	1168	28.86
chr13	100297859	100298582	1169	35.18
chr13	100324976	100325536	1170	17.64
chr13	100364244	100364661	1171	15.57
chr13	100417584	100418249	1172	37.17
chr13	100466097	100467513	1173	24.02
chr13	100490540	100490960	1174	8.04
chr13	100524177	100524557	1175	30.66
chr13	100531430	100532303	1176	25.47
chr13	100555175	100556230	1177	10.51
chr13	100607678	100608297	1178	48.07
chr13	100771779	100772560	1179	9.88
chr13	100877663	100878265	1180	17.4
chr13	101514799	101515237	1181	10.64
chr13	101615613	101616820	1182	28.09
chr13	101617028	101617651	1183	44.62
chr13	101720205	101720973	1184	22.87
chr13	102428750	102429234	1185	19
chr13	102581699	102582308	1186	17.58
chr13	103001042	103001707	1187	27.14
chr13	103307739	103308209	1188	11.09
chr13	103315738	103316464	1189	29.75
chr13	103455464	103455824	1190	14.43
chr13	104501172	104501675	1191	11.79
chr13	104768079	104768431	1192	22.85
chr13	104929481	104930061	1193	23.35
chr13	104967992	104969304	1194	24.22
chr13	105018695	105019018	1195	8.81
chr13	105308289	105308722	1196	10.04
chr13	105579816	105580109	1197	13.51
chr13	107737553	107738191	1198	11.43
chr13	109087551	109088692	1199	42.01
chr13	109105946	109106634	1200	16.95
chr13	110001946	110002964	1201	8.4
chr13	110566328	110566643	1202	10.99
chr13	110612187	110613016	1203	16.22
chr13	110697767	110698233	1204	28.02
chr13	110852097	110853729	1205	13.28
chr13	111015984	111017075	1206	19.72
chr13	112134742	112136838	1207	42.22
chr13	112147329	112147948	1208	22.32
chr13	112299482	112299913	1209	26.34
chr13	113450439	113451177	1210	14.07
chr13	113545150	113545450	1211	24.77
chr13	113717341	113718012	1212	6.44
chr13	114133873	114134316	1213	16.86
chr13	114747320	114748057	1214	13.34
chr13	115128539	115128759	1215	13.87
chr13	115608334	115608682	1216	21.18
chr13	115722087	115722524	1217	8.39
chr13	115891558	115892319	1218	29.26
chr13	116211627	116211992	1219	24.12
chr13	116217840	116218133	1220	10.6
chr13	116477688	116478251	1221	31.59
chr13	116877856	116878458	1222	10.67
chr13	117814083	117814376	1223	19.66
chr13	118013738	118014126	1224	22.68
chr13	118024298	118024683	1225	19.99
chr13	118100381	118100874	1226	18.44
chr14	8606463	8606900	1227	33.3
chr14	8680338	8680573	1228	13.1
chr14	8826801	8827198	1229	15.65
chr14	8829738	8830071	1230	13.13
chr14	9040520	9041971	1231	22.47
chr14	10225771	10226295	1232	25.17
chr14	10282409	10283287	1233	37.83
chr14	12386781	12387299	1234	10.3
chr14	12607765	12608320	1235	16.38
chr14	20796067	20796915	1236	21.82
chr14	20806105	20806816	1237	25.01
chr14	20901645	20902780	1238	12.86
chr14	21365729	21366081	1239	32.19
chr14	21479992	21480498	1240	12.22
chr14	21492032	21492791	1241	13.45
chr14	21711101	21711790	1242	23.07
chr14	22258881	22259895	1243	24.34
chr14	22320584	22321083	1244	13.36
chr14	22501627	22502468	1245	21.08
chr14	22649976	22650413	1246	19
chr14	22668015	22668448	1247	44.24
chr14	23602798	23603481	1248	13.25
chr14	23865710	23866222	1249	20.32
chr14	23963888	23964694	1250	10.46
chr14	24409169	24409947	1251	14.1
chr14	24717047	24717448	1252	9.73
chr14	24879003	24879273	1253	12.81
chr14	25405705	25406454	1254	24.52
chr14	25598290	25599248	1255	19.59
chr14	25765232	25765545	1256	18.76
chr14	26005810	26006458	1257	11.02
chr14	26085819	26086482	1258	17.03
chr14	26338966	26339644	1259	34.47
chr14	26459891	26460194	1260	11.22
chr14	27964449	27965557	1261	15.78
chr14	27976426	27976810	1262	13.75
chr14	27984038	27984810	1263	13.37
chr14	28112619	28113131	1264	14.19
chr14	28467489	28468227	1265	9.32
chr14	32617021	32617342	1266	11.08
chr14	32777146	32777591	1267	6.7
chr14	33400245	33400591	1268	16.58
chr14	35296809	35297152	1269	14.8
chr14	35325031	35325530	1270	10.76
chr14	47756299	47756699	1271	16.63
chr14	47801127	47801821	1272	20.11
chr14	48037664	48038106	1273	18.35
chr14	51404985	51405346	1274	19.14
chr14	52638904	52639539	1275	38.24
chr14	52877470	52877865	1276	8.26
chr14	54866141	54866630	1277	22.71
chr14	55333074	55333437	1278	7.49
chr14	55512418	55512798	1279	13.53
chr14	55633338	55634191	1280	19.38
chr14	55656463	55656722	1281	15.59
chr14	55698087	55698421	1282	20.92
chr14	55704204	55705182	1283	35.75
chr14	55767229	55767825	1284	53.9
chr14	55808325	55808704	1285	9.59
chr14	55833405	55833846	1286	18.15
chr14	56203342	56203899	1287	13.15
chr14	56254350	56254711	1288	19.28
chr14	56300301	56301009	1289	15.89
chr14	56400111	56400363	1290	15.02
chr14	56537628	56537893	1291	11.17
chr14	56796506	56797017	1292	8.87
chr14	57286858	57287704	1293	38.96
chr14	57396713	57397798	1294	23.83
chr14	60216533	60217303	1295	50.84
chr14	61402903	61403872	1296	8.47
chr14	62492443	62493512	1297	14.91
chr14	63188653	63189189	1298	15.12
chr14	63380373	63381110	1299	8.95
chr14	63498373	63498690	1300	16.28
chr14	63673527	63674169	1301	23.91
chr14	63680962	63681419	1302	35.31
chr14	63996755	63997146	1303	22.63
chr14	64634476	64634854	1304	7.79
chr14	65885001	65885596	1305	23.11
chr14	65999422	65999837	1306	13.68
chr14	66381127	66381725	1307	9.1
chr14	68611852	68612329	1308	9.32
chr14	70023470	70023710	1309	8.79
chr14	70949065	70949579	1310	28.69
chr14	71243196	71244024	1311	28.83
chr14	71580635	71581106	1312	14.36
chr14	73138002	73138454	1313	42.78
chr14	76932721	76933161	1314	18.46
chr14	120623484	120624394	1315	20.65
chr14	120695158	120695857	1316	14.69
chr14	121458440	121458813	1317	9.04
chr15	3975908	3976689	1318	20.94
chr15	4146870	4147079	1319	20.91
chr15	4324469	4325665	1320	17.76
chr15	4995715	4996219	1321	15.12
chr15	5019144	5019525	1322	7.19
chr15	5608805	5609180	1323	26.85
chr15	9066078	9066473	1324	15.04
chr15	9070003	9070365	1325	7.75
chr15	11309282	11310154	1326	10.35
chr15	11326194	11326466	1327	15.41
chr15	12669651	12670312	1328	11.1
chr15	26448826	26449478	1329	29.54
chr15	26549873	26550752	1330	20.62
chr15	26647571	26648113	1331	10.37
chr15	27137669	27138295	1332	12.78
chr15	27335455	27335873	1333	11.84
chr15	27560512	27560748	1334	17.92
chr15	27718030	27718696	1335	24.46
chr15	34372678	34373258	1336	20.18
chr15	34724884	34725247	1337	9.96
chr15	34820471	34820881	1338	13.3
chr15	35300647	35301129	1339	16.9
chr15	36658951	36659433	1340	8.74
chr15	37277258	37277622	1341	20.46
chr15	37890173	37891117	1342	24
chr15	38093517	38093999	1343	18.13
chr15	38099369	38099841	1344	35.84
chr15	38174473	38175028	1345	27.69
chr15	38177429	38178004	1346	20.29
chr15	38204675	38205541	1347	32.76
chr15	38314189	38314862	1348	12.57
chr15	38531795	38532434	1349	13.42
chr15	40995243	40995568	1350	11.85
chr15	41279330	41280132	1351	24.93
chr15	41443689	41444124	1352	30.02
chr15	43700131	43700678	1353	13.44
chr15	44191077	44191720	1354	10.1
chr15	50498012	50498601	1355	12.88
chr15	50529381	50529925	1356	15.49
chr15	50828698	50829322	1357	37.09
chr15	51424080	51424957	1358	11.39
chr15	51730571	51731079	1359	15.32
chr15	52960123	52960601	1360	26.78
chr15	52988902	52989270	1361	10.6
chr15	54903632	54904202	1362	46.36
chr15	57422046	57422400	1363	25.58
chr15	57432392	57432742	1364	15.81
chr15	57801816	57802083	1365	8.46
chr15	57807044	57808197	1366	15.08
chr15	57865704	57866014	1367	50.61
chr15	58335607	58336006	1368	15
chr15	58348721	58349397	1369	13.87
chr15	58806948	58807601	1370	20.39
chr15	58808130	58808728	1371	12
chr15	59112281	59113296	1372	18.31
chr15	59122957	59123326	1373	9.23
chr15	59170098	59170655	1374	13.9
chr15	59479033	59479520	1375	28.39
chr15	59479980	59480647	1376	22.5
chr15	61816976	61817329	1377	16.84
chr15	61843204	61843718	1378	17.64
chr15	62053807	62055301	1379	21.88
chr15	62234796	62235694	1380	16.55
chr15	62400604	62401453	1381	21.99
chr15	62734524	62734999	1382	18.99
chr15	63484027	63484506	1383	14.22
chr15	64458883	64459372	1384	16.58
chr15	65933343	65933667	1385	11.08
chr15	65968586	65969163	1386	23.72
chr15	66128919	66129321	1387	9.34
chr15	68070671	68071102	1388	20.36
chr15	68089680	68090512	1389	10.17
chr15	71816274	71817366	1390	22.38
chr15	71936542	71937115	1391	28.91
chr15	72460213	72460569	1392	9.4
chr15	72490398	72491024	1393	11.97
chr15	72704205	72704653	1394	29.07
chr15	72729674	72730313	1395	7.52
chr15	72764203	72764974	1396	8.33
chr15	73017282	73017690	1397	16.83
chr15	73297056	73297448	1398	21.37
chr15	73300549	73300989	1399	20.85
chr15	73303554	73303800	1400	9.23
chr15	73476277	73476686	1401	26.86
chr15	74503249	74503822	1402	12.04
chr15	75471485	75472032	1403	11.22
chr15	75508607	75509001	1404	13.04
chr15	75544991	75545548	1405	13.22
chr15	75672260	75672693	1406	18.94
chr15	75687085	75687767	1407	10.89
chr15	75911537	75912061	1408	11.38
chr15	76038343	76039088	1409	17.36
chr15	76060914	76062313	1410	24.53
chr15	76089987	76091085	1411	27.09
chr15	76094747	76095236	1412	21.21
chr15	76157423	76157977	1413	25.95
chr15	76182047	76182448	1414	13.59
chr15	76383155	76383418	1415	13.92
chr15	76490329	76490683	1416	9.76
chr15	76498501	76498846	1417	20.17
chr15	76575732	76576019	1418	12.02
chr15	76729993	76730357	1419	8.62
chr15	76734126	76734823	1420	34.85
chr15	76738400	76738753	1421	5.82
chr15	76804897	76805381	1422	11.87
chr15	76834327	76834731	1423	13.84
chr15	76859777	76860281	1424	21.16
chr15	76979241	76979521	1425	10.04
chr15	76986892	76987246	1426	18.13
chr15	77166634	77167290	1427	38.16
chr15	77173627	77174243	1428	28.14
chr15	77197061	77197708	1429	19.98
chr15	77672645	77673108	1430	28.17
chr15	77686629	77687636	1431	14.4
chr15	77759356	77759827	1432	27.5
chr15	77763786	77764589	1433	14.66
chr15	77764819	77765602	1434	9.26
chr15	78087166	78088342	1435	21.57
chr15	78267232	78267932	1436	28.66
chr15	78344964	78345425	1437	43.41
chr15	78362482	78363049	1438	25.11
chr15	78372031	78372693	1439	15.52
chr15	78385314	78385724	1440	18.27
chr15	78411949	78412853	1441	27.31
chr15	78454832	78455748	1442	39.8
chr15	78512261	78512787	1443	21.45
chr15	78549939	78550933	1444	11.84
chr15	78565853	78566430	1445	17.01
chr15	78665415	78666205	1446	18.72
chr15	78666606	78667262	1447	23.6
chr15	78765058	78765768	1448	21.18
chr15	79032664	79033291	1449	8.56
chr15	79100841	79101933	1450	23.62
chr15	79111522	79112007	1451	11.6
chr15	79157656	79158949	1452	42.5
chr15	79177488	79177860	1453	9.6
chr15	79296945	79297673	1454	12.88
chr15	79489214	79489709	1455	12.04
chr15	79664903	79665262	1456	13.1
chr15	79801454	79801752	1457	14.87
chr15	79913227	79914579	1458	18.31
chr15	79929100	79930326	1459	11.45
chr15	80049485	80050009	1460	27.96
chr15	80096574	80097051	1461	16.38
chr15	80119655	80120520	1462	11.26
chr15	80536645	80536927	1463	13.14
chr15	80541401	80541858	1464	36.7
chr15	80628815	80629180	1465	35.52
chr15	80680397	80680824	1466	11.38
chr15	81009231	81009596	1467	12.25
chr15	81057167	81057714	1468	9.45
chr15	81131668	81132012	1469	13.32
chr15	81191076	81191610	1470	14.82
chr15	81230141	81231018	1471	16.5
chr15	81311092	81312167	1472	21.56
chr15	81494036	81494596	1473	17.13
chr15	81560169	81560717	1474	24.08
chr15	81641479	81641874	1475	12.89
chr15	81661702	81662330	1476	15.54
chr15	81688601	81689364	1477	23.07
chr15	81893598	81894531	1478	8.71
chr15	82176358	82177038	1479	72.02
chr15	82751672	82752119	1480	10.1
chr15	82987394	82988156	1481	20.9
chr15	82997124	82997468	1482	22.4
chr15	83039536	83040005	1483	8.55
chr15	83040221	83040980	1484	13.01
chr15	83082350	83083153	1485	24.89
chr15	83107771	83108933	1486	52.07
chr15	83496669	83497310	1487	14.68
chr15	84110799	84111429	1488	16.83
chr15	84113513	84113828	1489	8.2
chr15	84315187	84316485	1490	13.21
chr15	84443942	84445115	1491	12.27
chr15	84457658	84458017	1492	19.42
chr15	84545497	84546003	1493	9.02
chr15	84722020	84722539	1494	27.65
chr15	85430069	85431016	1495	10.17
chr15	85441050	85441896	1496	30.75
chr15	85555013	85555643	1497	21.39
chr15	86018693	86019156	1498	6.15
chr15	86308840	86310079	1499	26.43
chr15	88667584	88668217	1500	13.6
chr15	88953069	88953919	1501	12.62
chr15	88971407	88971794	1502	14.76
chr15	89040298	89041059	1503	24.36
chr15	89150957	89151281	1504	8.87
chr15	93228714	93229165	1505	13.77
chr15	93269231	93269504	1506	24.05
chr15	95634639	95635148	1507	22.26
chr15	95704703	95705381	1508	30.44
chr15	96295289	96295925	1509	29.64
chr15	96306889	96307288	1510	38.09
chr15	96322018	96323283	1511	26.62
chr15	96373470	96374293	1512	20.02
chr15	97679731	97680407	1513	12.68
chr15	97771276	97772190	1514	12.82
chr15	97938097	97938529	1515	15.05
chr15	97938861	97939326	1516	12.32
chr15	97976132	97976815	1517	31.24
chr15	97984484	97984869	1518	24.14
chr15	98447551	98448065	1519	10.84
chr15	98502864	98503885	1520	16.92
chr15	98593475	98594263	1521	26.53
chr15	98748559	98749039	1522	30.08
chr15	98759014	98759386	1523	22.53
chr15	98765616	98766173	1524	19.81
chr15	98783843	98784294	1525	11.96
chr15	98808053	98809091	1526	30.1
chr15	98816059	98816494	1527	29.96
chr15	98883747	98884266	1528	39.81
chr15	98904548	98905437	1529	14.98
chr15	99082539	99083436	1530	10.46
chr15	99230120	99230509	1531	10.77
chr15	99246871	99247232	1532	40.92
chr15	99328268	99328568	1533	8.26
chr15	99426336	99426696	1534	15.33
chr15	99436882	99437305	1535	23.14
chr15	99445547	99446250	1536	12.42
chr15	99519013	99519572	1537	15.59
chr15	99522073	99522789	1538	15.12
chr15	99602931	99603318	1539	14.5
chr15	99648852	99649682	1540	10.12
chr15	100584584	100585632	1541	36.77
chr15	100587547	100588707	1542	25.91
chr15	100878636	100879095	1543	10
chr15	100928450	100929002	1544	12.31
chr15	100935772	100936791	1545	27.84
chr15	100970224	100970928	1546	11.94
chr15	101814532	101815732	1547	56.85
chr15	101933297	101933884	1548	7.82
chr15	102281246	102281687	1549	27.32
chr15	102289379	102289799	1550	38.01
chr15	102455983	102456652	1551	12.58
chr15	102495794	102496215	1552	14.71
chr15	102501470	102502010	1553	22.21
chr15	102572996	102573524	1554	17.79
chr15	102829087	102829699	1555	17.91
chr15	102898806	102899068	1556	19.36
chr15	102998085	102998761	1557	16.85
chr15	103070196	103071651	1558	27.97
chr15	103133949	103134964	1559	20.01
chr16	3122804	3123129	1560	41.78
chr16	3743484	3744266	1561	15.44
chr16	4639416	4639995	1562	9.22
chr16	4678579	4679918	1563	18.09
chr16	10545216	10545562	1564	13.21
chr16	10786475	10787550	1565	11.35
chr16	11066093	11066543	1566	40.18
chr16	11254156	11254918	1567	12.81
chr16	11323258	11324003	1568	8.07
chr16	13197273	13197966	1569	13.68
chr16	13371892	13372314	1570	35.14
chr16	13437026	13437379	1571	12.14
chr16	14317276	14318022	1572	17.52
chr16	17508474	17509097	1573	19.08
chr16	17938899	17939423	1574	16.38
chr16	18052692	18053078	1575	20.26
chr16	18460024	18460571	1576	10.4
chr16	18638433	18638847	1577	17.89
chr16	18877878	18878512	1578	6.97
chr16	20302247	20303136	1579	22.6
chr16	20490582	20491186	1580	21.98
chr16	20496584	20497106	1581	13.97
chr16	20498698	20499055	1582	14.23
chr16	20548009	20548843	1583	19.99
chr16	20628555	20629254	1584	9.08
chr16	21211111	21211564	1585	14.5
chr16	22008950	22009213	1586	20.51
chr16	22440394	22440875	1587	22.26
chr16	29579172	29579485	1588	20.44
chr16	30252205	30252518	1589	17.77
chr16	30388011	30388396	1590	8.08
chr16	30390645	30391032	1591	9.4
chr16	30627555	30628189	1592	18.15
chr16	30732665	30733417	1593	24.62
chr16	30735722	30736218	1594	8.28
chr16	30776240	30776784	1595	9.68
chr16	30793325	30793785	1596	8.82
chr16	31355090	31355514	1597	76.47
chr16	31883172	31883966	1598	12.28
chr16	32499713	32500262	1599	21.31
chr16	32708335	32708914	1600	8.05
chr16	32867918	32868608	1601	7.54
chr16	33056433	33056694	1602	54.89
chr16	33344262	33345333	1603	15.22
chr16	33673433	33674074	1604	32.31
chr16	33860031	33860380	1605	9.1
chr16	33891811	33892477	1606	11.57
chr16	33941206	33941806	1607	9.24
chr16	33999609	33999911	1608	11.61
chr16	34342461	34342960	1609	18.28
chr16	35110532	35110821	1610	9.42
chr16	35907599	35908027	1611	12.61
chr16	36056734	36057252	1612	20.41
chr16	37715197	37715517	1613	23.04
chr16	37749237	37749729	1614	8.79
chr16	37814104	37814694	1615	40.24
chr16	37940510	37941037	1616	24.99
chr16	37982006	37982326	1617	7.47
chr16	38476735	38477200	1618	13.52
chr16	38562817	38563176	1619	13.5
chr16	42169787	42170086	1620	17.87
chr16	42189688	42191164	1621	37.14
chr16	42276474	42276915	1622	35.9
chr16	42380528	42381082	1623	17.63
chr16	42440874	42441299	1624	10.35
chr16	43503170	43504022	1625	9.01
chr16	43700419	43701150	1626	14.58
chr16	43708962	43709835	1627	25.3
chr16	43889681	43890318	1628	20.68
chr16	45627941	45628770	1629	15.65
chr16	45630598	45631072	1630	10.76
chr16	50046316	50046714	1631	11.28
chr16	50508718	50509154	1632	9.61
chr16	50530080	50530598	1633	36.96
chr16	50732762	50733364	1634	13.75
chr16	54735510	54736119	1635	16.27
chr16	56037588	56038172	1636	11.63
chr16	56049059	56049405	1637	20.09
chr16	57243594	57243859	1638	12.31
chr16	57362756	57363340	1639	11.26
chr16	58727796	58728216	1640	27.05
chr16	75696464	75696814	1641	11.78
chr16	75766975	75767315	1642	15.59
chr16	77644646	77645057	1643	25.49
chr16	84549116	84549804	1644	11.24
chr16	84835020	84835610	1645	20.08
chr16	84875212	84875662	1646	28.96
chr16	85137476	85138155	1647	28.7
chr16	87432722	87433281	1648	30.07
chr16	90709862	90710426	1649	9.83
chr16	90712362	90713187	1650	9.57
chr16	90872823	90873473	1651	19.02
chr16	90911058	90911905	1652	9.07
chr16	91728417	91729280	1653	50.84
chr16	91995663	91996249	1654	43.99
chr16	92117847	92118364	1655	15.05
chr16	92234719	92235367	1656	20.75
chr16	92400254	92401057	1657	10.96
chr16	92457624	92458281	1658	16.06
chr16	92520181	92520654	1659	14.7
chr16	92778280	92778810	1660	19.73
chr16	93293223	93293787	1661	15.78
chr16	93446259	93447042	1662	41.44
chr16	93543772	93544298	1663	18.51
chr16	93607952	93608313	1664	21.57
chr16	93615705	93616012	1665	13.16
chr16	93654946	93655331	1666	35.29
chr16	93884041	93884692	1667	6.29
chr16	94535224	94535604	1668	10.64
chr16	95340950	95341329	1669	11.43
chr16	95612465	95613064	1670	8.67
chr16	95869547	95869799	1671	20.06
chr16	96313289	96313799	1672	10.96
chr16	96566729	96567305	1673	11.44
chr16	96579532	96579867	1674	15.7
chr16	96620578	96621556	1675	12.47
chr16	96690284	96690601	1676	10.23
chr16	96939989	96940380	1677	12.02
chr16	97534400	97535575	1678	18.14
chr17	3432713	3433144	1679	9.24
chr17	4265827	4266935	1680	21.25
chr17	4778229	4778517	1681	25.73
chr17	5397421	5397821	1682	13.91
chr17	5440607	5441046	1683	10.46
chr17	5748775	5749089	1684	16.24
chr17	5783034	5783684	1685	7.02
chr17	5798204	5798843	1686	18
chr17	7425677	7426312	1687	14.37
chr17	7473392	7474266	1688	28.99
chr17	9000106	9000587	1689	20.7
chr17	12311911	12312378	1690	12.57
chr17	12380640	12380941	1691	12.07
chr17	15202626	15203300	1692	12.51
chr17	21653449	21654114	1693	36.38
chr17	21703634	21704267	1694	21.34
chr17	23004009	23004500	1695	13.09
chr17	23735923	23736613	1696	30.8
chr17	23876399	23876776	1697	16.77
chr17	23927229	23928040	1698	17.77
chr17	24300607	24300890	1699	9.88
chr17	24349226	24349679	1700	18.13
chr17	24357678	24358417	1701	23.18
chr17	24615618	24616051	1702	15.35
chr17	24872817	24873690	1703	13.15
chr17	25376860	25377215	1704	15.42
chr17	25611228	25611881	1705	7.72
chr17	25702214	25702715	1706	10.71
chr17	25864083	25864662	1707	43.89
chr17	25929143	25929908	1708	8.37
chr17	25940149	25940552	1709	16.72
chr17	25960489	25960806	1710	28.47
chr17	26010812	26011486	1711	7.94
chr17	26056783	26057639	1712	19.2
chr17	26260281	26260642	1713	18.05
chr17	26389333	26390119	1714	18.92
chr17	26505131	26505684	1715	10.37
chr17	26697877	26698253	1716	9.56
chr17	26998398	26998641	1717	9.8
chr17	27053543	27054106	1718	13.42
chr17	27164852	27165854	1719	12.95
chr17	27341329	27342024	1720	19.8
chr17	27787159	27787536	1721	14.87
chr17	27920559	27921076	1722	12.62
chr17	27956497	27956835	1723	9.04
chr17	28078653	28079032	1724	11.51
chr17	29016856	29017251	1725	20.89
chr17	29019214	29019579	1726	42.47
chr17	29159118	29159521	1727	14.06
chr17	29382560	29383310	1728	8.89
chr17	29651489	29652207	1729	28.39
chr17	29751588	29752000	1730	18.11
chr17	30019973	30020278	1731	21.47
chr17	30033163	30033583	1732	12.15
chr17	30141162	30141452	1733	10.67
chr17	30483707	30484782	1734	28.65
chr17	30711033	30711464	1735	9.83
chr17	31029793	31030559	1736	14.15
chr17	31038982	31039547	1737	14.84
chr17	31147966	31148741	1738	20.18
chr17	31649029	31649571	1739	13.5
chr17	31776446	31777443	1740	16
chr17	31993524	31993841	1741	27.57
chr17	32254449	32255930	1742	8.1
chr17	32372545	32373129	1743	46.58
chr17	32487299	32487680	1744	17.82
chr17	32526468	32526926	1745	18.03
chr17	32665670	32666120	1746	21.95
chr17	32673259	32673918	1747	9.78
chr17	32890448	32890918	1748	17.46
chr17	33229017	33229940	1749	10.87
chr17	33495537	33495957	1750	17.74
chr17	33961091	33961758	1751	11.68
chr17	34057304	34057767	1752	17.84
chr17	34115681	34116017	1753	11.1
chr17	34238518	34238874	1754	11.25
chr17	35301843	35302244	1755	13.7
chr17	35810295	35810940	1756	17.39
chr17	35834924	35835721	1757	28.94
chr17	35978034	35978870	1758	24.81
chr17	36053200	36053532	1759	20.86
chr17	36923416	36923882	1760	10.29
chr17	37165582	37166037	1761	29.13
chr17	41071235	41072243	1762	9.46
chr17	44215529	44215996	1763	8.1
chr17	45388443	45388836	1764	31.01
chr17	46164412	46165011	1765	9.89
chr17	46200378	46201351	1766	16.46
chr17	46211812	46212520	1767	24.62
chr17	46219175	46219966	1768	16.46
chr17	46247674	46248161	1769	12.49
chr17	46290294	46290634	1770	21.34
chr17	46297643	46298003	1771	12.36
chr17	46339242	46339664	1772	18.48
chr17	46419707	46420459	1773	25.4
chr17	46464523	46465323	1774	21.72
chr17	46624565	46625363	1775	14.13
chr17	46919186	46920189	1776	36.97
chr17	47049221	47049683	1777	26.2
chr17	47559186	47559919	1778	9.06
chr17	47565805	47566376	1779	10.26
chr17	49701320	49701651	1780	11.1
chr17	49955219	49955894	1781	14.11
chr17	49956078	49956497	1782	11.83
chr17	50385397	50386527	1783	30.86
chr17	50546735	50547029	1784	9.24
chr17	53726340	53727349	1785	18.13
chr17	56218498	56219026	1786	23.99
chr17	56443249	56443557	1787	9.84
chr17	56749034	56749626	1788	29.15
chr17	56764842	56765265	1789	7.68
chr17	56766234	56766858	1790	11.71
chr17	56918444	56918959	1791	13.8
chr17	57129283	57129921	1792	22.66
chr17	57150519	57151071	1793	22.88
chr17	57170853	57171848	1794	12.33
chr17	57387589	57388068	1795	43.27
chr17	63041573	63041898	1796	11.27
chr17	63044060	63044883	1797	14.29
chr17	63232852	63233949	1798	11.65
chr17	63357552	63357963	1799	12
chr17	63763311	63763684	1800	15.4
chr17	64681320	64682431	1801	26.15
chr17	65251137	65251825	1802	10.56
chr17	66086989	66087539	1803	37.22
chr17	66570456	66570902	1804	20.95
chr17	66612092	66612559	1805	8.67
chr17	66828517	66828963	1806	17.85
chr17	71086683	71087313	1807	13.18
chr17	72285657	72285987	1808	23.07
chr17	72674744	72675663	1809	24.77
chr17	73620641	73622007	1810	25.97
chr17	79281538	79282197	1811	8.93
chr17	80463148	80463816	1812	26.89
chr17	80547735	80548248	1813	14.76
chr17	80654509	80654951	1814	18.48
chr17	81200856	81201204	1815	10.53
chr17	81246344	81246920	1816	11.48
chr17	81953381	81954168	1817	24.43
chr17	82139552	82140329	1818	16.67
chr17	83652439	83652899	1819	17.27
chr17	83722300	83722533	1820	8.11
chr17	83913497	83913762	1821	10.22
chr17	83926494	83926981	1822	24.86
chr17	83963265	83963888	1823	11.72
chr17	84132128	84132469	1824	26.37
chr17	84481253	84481739	1825	22.06
chr17	84515420	84515937	1826	26.65
chr17	84552070	84552722	1827	26.86
chr17	85489101	85490114	1828	21.28
chr17	85740562	85741373	1829	18.84
chr17	86651871	86652705	1830	12.13
chr17	86691998	86692839	1831	24
chr17	87921536	87922551	1832	8.61
chr17	88929000	88929378	1833	19.15
chr18	5819784	5820456	1834	15.77
chr18	6410371	6411295	1835	13.23
chr18	6419360	6420029	1836	60.08
chr18	6764797	6765182	1837	34.04
chr18	12042180	12042751	1838	11.99
chr18	12060641	12061264	1839	24.72
chr18	21458754	21459024	1840	17.13
chr18	24280221	24280941	1841	13.9
chr18	24629205	24629441	1842	17.01
chr18	25716732	25717316	1843	8.16
chr18	25820491	25820788	1844	19.14
chr18	25872781	25873642	1845	25.14
chr18	31606816	31607234	1846	21.29
chr18	31769513	31769915	1847	13.2
chr18	33321421	33321688	1848	14.75
chr18	33321912	33322304	1849	16.12
chr18	34407082	34407563	1850	35.83
chr18	34418897	34419218	1851	8.51
chr18	34918227	34919213	1852	17.62
chr18	34993349	34993617	1853	9.63
chr18	35018690	35019648	1854	8.06
chr18	35181530	35182348	1855	16.53
chr18	35187414	35188028	1856	11.7
chr18	35520445	35520828	1857	8.78
chr18	35691984	35692327	1858	14.05
chr18	35699596	35699998	1859	14.54
chr18	35930546	35931058	1860	22.52
chr18	36003104	36003451	1861	15.6
chr18	36118682	36119220	1862	17.11
chr18	36657523	36657995	1863	11.35
chr18	36719423	36720277	1864	13.22
chr18	36839173	36839737	1865	16.68
chr18	36961149	36961919	1866	57.65
chr18	37377701	37378231	1867	9.94
chr18	37601780	37602388	1868	5.85
chr18	37839812	37840328	1869	12.52
chr18	37965659	37966013	1870	17.58
chr18	38011645	38012058	1871	21.15
chr18	38015459	38016507	1872	13.78
chr18	38223796	38224270	1873	12.9
chr18	38227465	38228546	1874	19.07
chr18	38264200	38264618	1875	11.3
chr18	38303352	38303696	1876	31.73
chr18	38303855	38304621	1877	26.35
chr18	38305184	38306019	1878	16.74
chr18	38306239	38307231	1879	23.61
chr18	38324794	38325119	1880	13.86
chr18	38330193	38330599	1881	12.4
chr18	38333287	38334586	1882	34.59
chr18	38363347	38363729	1883	12.8
chr18	38373124	38374066	1884	30.43
chr18	38444989	38446806	1885	13.36
chr18	39029162	39029834	1886	23.95
chr18	39048062	39048556	1887	11.8
chr18	39255622	39256299	1888	28.09
chr18	39463738	39464122	1889	8.39
chr18	42421401	42422221	1890	10.62
chr18	42968389	42968787	1891	7.55
chr18	43092704	43093355	1892	8.31
chr18	43305283	43305620	1893	10.97
chr18	43410002	43410768	1894	10.64
chr18	43562649	43563330	1895	82.4
chr18	43581131	43581781	1896	17.38
chr18	43846908	43847410	1897	20.25
chr18	54393600	54393948	1898	12.13
chr18	55537504	55537818	1899	16.79
chr18	55650257	55650958	1900	13.11
chr18	55665670	55666207	1901	11.13
chr18	56591590	56592187	1902	18.52
chr18	56896947	56897406	1903	17.49
chr18	56971450	56971810	1904	9.69
chr18	57426673	57427051	1905	17.1
chr18	61094994	61095224	1906	15.91
chr18	61199471	61199866	1907	13.56
chr18	61642043	61642418	1908	70.68
chr18	61797573	61798460	1909	16.9
chr18	61824712	61825119	1910	15.86
chr18	61953324	61953773	1911	14.66
chr18	64225887	64226883	1912	13.16
chr18	64641997	64642581	1913	8.53
chr18	65959578	65960210	1914	22.1
chr18	66162223	66162710	1915	10.4
chr18	68634572	68634839	1916	13.66
chr18	68737696	68738094	1917	13.87
chr18	69271101	69271592	1918	19.72
chr18	69356200	69356898	1919	9.88
chr18	69752059	69752650	1920	12.98
chr18	70632087	70632469	1921	17.71
chr18	75757550	75758109	1922	55.38
chr18	75766585	75767091	1923	8.95
chr18	76194872	76195354	1924	24.58
chr18	76269833	76270844	1925	14.99
chr18	77285384	77286022	1926	47.66
chr18	79663728	79664458	1927	12.87
chr18	80984649	80985480	1928	15.83
chr18	81104113	81104509	1929	16.14
chr18	81250243	81250952	1930	13.87
chr18	82228861	82229785	1931	18.29
chr18	82390378	82390882	1932	27.1
chr18	83293107	83293707	1933	7.43
chr18	83303999	83304466	1934	25.13
chr18	84415055	84415742	1935	16.96
chr18	90748902	90749453	1936	29.37
chr19	3333856	3334590	1937	11.13
chr19	3912346	3913041	1938	13.14
chr19	4045758	4046467	1939	21.53
chr19	4497424	4497819	1940	59
chr19	4981724	4982175	1941	27.37
chr19	5072805	5073040	1942	7.53
chr19	5345680	5346118	1943	20.01
chr19	5688575	5689126	1944	18.71
chr19	5800430	5801342	1945	26.75
chr19	5806090	5806541	1946	15.91
chr19	5811950	5812344	1947	13.72
chr19	5843900	5844511	1948	6.23
chr19	5847943	5848504	1949	12.45
chr19	6104547	6105003	1950	18.08
chr19	6128064	6128498	1951	17.82
chr19	6236061	6236541	1952	17.08
chr19	6304617	6305167	1953	25.31
chr19	6334029	6335278	1954	19.81
chr19	6400443	6400811	1955	11.11
chr19	6452149	6452579	1956	32.83
chr19	6915097	6915567	1957	20.04
chr19	7157457	7157922	1958	11.28
chr19	7217038	7217534	1959	12.32
chr19	7235170	7235429	1960	10.11
chr19	7291968	7292685	1961	19.7
chr19	7309200	7309711	1962	28.19
chr19	7317770	7318214	1963	7.17
chr19	8652767	8653496	1964	10.07
chr19	8787139	8787638	1965	109.91
chr19	8848692	8849036	1966	10.67
chr19	8893860	8894317	1967	8.06
chr19	8894426	8894901	1968	22.18
chr19	8945850	8946131	1969	20.61
chr19	8963229	8963528	1970	22.42
chr19	8972113	8972733	1971	8.64
chr19	9027595	9029148	1972	15
chr19	9041257	9042541	1973	27.7
chr19	9127487	9127989	1974	103.38
chr19	9148861	9149228	1975	10.34
chr19	10020722	10021127	1976	15.99
chr19	10340832	10341412	1977	14.24
chr19	10634516	10635028	1978	18.22
chr19	10762474	10762943	1979	12.13
chr19	12666347	12666737	1980	12.13
chr19	14729735	14730182	1981	18.08
chr19	14958579	14959216	1982	16.34
chr19	14964883	14965877	1983	22.64
chr19	15742493	15742806	1984	12.13
chr19	16059223	16059881	1985	27
chr19	16103774	16104404	1986	12.23
chr19	16138482	16139199	1987	13.63
chr19	17024487	17025464	1988	24.12
chr19	17085657	17086247	1989	14.62
chr19	19185475	19186340	1990	15.84
chr19	20077058	20077354	1991	10.83
chr19	21727167	21727688	1992	40.99
chr19	22990346	22990644	1993	17.38
chr19	23208579	23209653	1994	13.29
chr19	23454164	23454508	1995	18.34
chr19	29122510	29122996	1996	8.49
chr19	29138288	29138696	1997	10.74
chr19	29224511	29225211	1998	29.14
chr19	29430096	29430340	1999	21.63
[truncated: 2,209 more rows]

## Sheet: GO - CHART 10kb
GO_ID	LEVEL(S)	TERM	NB_IN_REF	FREQ_IN_REF	NB_IN_SET	FREQ_IN_SET	P_VALUE	ENRICHMENT/DEPLETION	GENES_IN_SET
GO:0016071	7,6	mRNA metabolic process	280	0.0191	20	0.0471	0.0001296	E	Papolb,Rngtt,Isy1,Phrf1,Zcrb1,Snw1,Dcps,Xab2,Bat1a,Hnrpll,1500002O20Rik,Kin,Hnrnph1,Tsen54,Npm1,Skiv2l2,Smg7,Ptcd2,Cwc22,Cdc40
GO:0006996	3	organelle organization	1002	0.0684	48	0.1129	0.0001865	E	P2rx7,Suv420h2,Cno,Lsp1,Cdca3,L3mbtl2,Pfn3,Hist1h2ah,Cln6,Aurkb,Dtnbp1,Dclre1c,Capg,Xrn1,Oip5,Fmnl1,Nusap1,Rab5b,Mad1l1,Smyd3,Fzr1,Tpp1,Katna1,Katnb1,Nefh,Stxbp1,Tssk6,Dnaja3,Cdc6,Ablim2,Cln3,Hook2,Shh,Tbce,Arpc2,Smarcal1,Npm1,Timeless,Herc2,Ptcd2,Prkcz,Acp2,Evl,H3f3b,Hist1h4j,H2afy2,Actr3b,Arid1a
GO:0006396	7,6,5	RNA processing	389	0.0265	24	0.0565	0.0002551	E	Papolb,Rngtt,Isy1,Phrf1,Rrp9,Gtpbp3,Xrn1,Nsun2,Zcrb1,Snw1,Larp7,Xab2,Bat1a,Hnrpll,Kin,Hnrnph1,Tsen54,Npm1,Skiv2l2,Ptcd2,Cwc22,Qtrt1,Cdc40,Naf1
GO:0044237	3	cellular metabolic process	6119	0.4174	209	0.4918	0.0002891	E	P2rx7,Suv420h2,Cdca3,Srd5a1,Polr2e,Coq6,Nars2,Ndufa13,Papolb,L3mbtl2,Blvrb,Ache,Zfp455,Med24,Wnk1,Bccip,Rngtt,Eif4e3,Usp45,Pprc1,Hmgb2,Trpc2,Agpat4,Cln6,Zfp94,Dpm2,Idh1,Isy1,Phrf1,Ube4b,Mbd4,Hsd17b7,Nudt5,Rrp9,Gtpbp3,Foxh1,Aurkb,Fbxo46,Dclre1c,Usp36,Capg,Zfpm1,Jund,Xrn1,Nsun2,Sox8,Enpp7,Hinfp,Gins2,Wipi1,Rpia,Nmt1,Ndufs2,Kcnip3,Tcea2,Uros,Mtap,Asb8,Nt5c3,Gsk3a,Fzr1,Gls2,Smurf1,Gtf2f1,Zfp157,Rpl7,…
GO:0008152	2	metabolic process	7146	0.4875	239	0.5624	0.0002899	E	P2rx7,Suv420h2,Cdca3,Srd5a1,Polr2e,Coq6,Cecr5,Nars2,Ndufa13,Papolb,L3mbtl2,Vat1l,Blvrb,Ache,Zfp455,Med24,Wnk1,Bccip,Rngtt,Eif4e3,Usp45,Pprc1,Prepl,Ifi30,Hmgb2,Trpc2,Agpat4,Adamts4,Cln6,Plod3,Zfp94,Dpm2,Idh1,Isy1,Phrf1,Ube4b,Hmgcl,Mbd4,Hsd17b7,Nudt5,Rrp9,Gtpbp3,Foxh1,Aurkb,Fbxo46,Dclre1c,Usp36,Capg,Zfpm1,Jund,Xrn1,Nsun2,Sox8,Enpp7,Hinfp,Gins2,Wipi1,Rpia,Nmt1,Ndufs2,Kcnip3,Tcea2,Uros,Mtap,A4galt,As…
GO:0044238	3	primary metabolic process	6264	0.4273	212	0.4988	0.000425	E	P2rx7,Suv420h2,Cdca3,Srd5a1,Polr2e,Nars2,Papolb,L3mbtl2,Ache,Zfp455,Med24,Wnk1,Bccip,Rngtt,Eif4e3,Usp45,Pprc1,Prepl,Ifi30,Hmgb2,Trpc2,Agpat4,Adamts4,Cln6,Zfp94,Dpm2,Idh1,Isy1,Phrf1,Ube4b,Mbd4,Hsd17b7,Nudt5,Rrp9,Gtpbp3,Foxh1,Aurkb,Fbxo46,Dclre1c,Usp36,Capg,Zfpm1,Jund,Xrn1,Nsun2,Sox8,Enpp7,Hinfp,Gins2,Rpia,Nmt1,Kcnip3,Tcea2,Mtap,A4galt,Asb8,Nt5c3,Gsk3a,Fzr1,Gls2,Smurf1,Gtf2f1,Zfp157,Rpl7,Phyh,Tpp1,…
GO:0006397	8,7,6	mRNA processing	244	0.0166	17	0.04	0.0005021	E	Papolb,Rngtt,Isy1,Phrf1,Zcrb1,Snw1,Xab2,Bat1a,Hnrpll,Kin,Hnrnph1,Tsen54,Npm1,Skiv2l2,Ptcd2,Cwc22,Cdc40
GO:0010467	4	gene expression	2959	0.2019	111	0.2612	0.0005044	E	P2rx7,Suv420h2,Polr2e,Nars2,Papolb,L3mbtl2,Zfp455,Med24,Rngtt,Eif4e3,Pprc1,Ifi30,Hmgb2,Zfp94,Isy1,Phrf1,Mbd4,Rrp9,Gtpbp3,Foxh1,Zfpm1,Jund,Xrn1,Nsun2,Sox8,Hinfp,Kcnip3,Tcea2,Gtf2f1,Zfp157,Rpl7,Nfkbia,Ddit3,Eef1g,Zcrb1,Snw1,Uba52,Dhx29,Ssbp2,Eif2c2,Arid3b,Sap30l,Npas4,Rps21,Aimp1,Larp7,Zfp869,Klf3,Wdtc1,Rpl35a,Xab2,Mrpl47,Dnaja3,Sirt4,Sox12,Ttll5,Hexim1,Sox9,Bat1a,Fech,Ablim2,Cln3,Zfp84,Eif2b5,Shh,…
GO:0034960	5	cellular biopolymer metabolic process	4682	0.3194	164	0.3859	0.000541	E	P2rx7,Suv420h2,Cdca3,Polr2e,Nars2,Papolb,L3mbtl2,Ache,Zfp455,Med24,Wnk1,Bccip,Rngtt,Eif4e3,Usp45,Pprc1,Hmgb2,Trpc2,Cln6,Zfp94,Dpm2,Isy1,Phrf1,Ube4b,Mbd4,Rrp9,Gtpbp3,Foxh1,Aurkb,Fbxo46,Dclre1c,Usp36,Capg,Zfpm1,Jund,Xrn1,Nsun2,Sox8,Hinfp,Gins2,Nmt1,Kcnip3,Tcea2,Asb8,Gsk3a,Fzr1,Smurf1,Gtf2f1,Zfp157,Rpl7,Nfkbia,Ddit3,Eef1g,Zcrb1,Snw1,Mst1r,Pigv,Uba52,Dhx29,Ssbp2,Eif2c2,Arid3b,Sap30l,Dcps,Rpa2,Tor3a,N…
GO:0044260	4	cellular macromolecule metabolic process	4788	0.3266	166	0.3906	0.0007715	E	P2rx7,Suv420h2,Cdca3,Polr2e,Nars2,Papolb,L3mbtl2,Ache,Zfp455,Med24,Wnk1,Bccip,Rngtt,Eif4e3,Usp45,Pprc1,Hmgb2,Trpc2,Cln6,Zfp94,Dpm2,Isy1,Phrf1,Ube4b,Mbd4,Rrp9,Gtpbp3,Foxh1,Aurkb,Fbxo46,Dclre1c,Usp36,Capg,Zfpm1,Jund,Xrn1,Nsun2,Sox8,Hinfp,Gins2,Rpia,Nmt1,Kcnip3,Tcea2,Asb8,Gsk3a,Fzr1,Smurf1,Gtf2f1,Zfp157,Rpl7,Nfkbia,Ddit3,Eef1g,Aldoc,Zcrb1,Snw1,Mst1r,Pigv,Uba52,Dhx29,Ssbp2,Eif2c2,Arid3b,Sap30l,Dcps,R…
GO:0060516	7,8,9,10,6	primary prostatic bud elongation	2	0.0001	2	0.0047	0.0008386	E	Sox9,Shh
GO:0044248	4	cellular catabolic process	828	0.0565	39	0.0918	0.0008714	E	Cdca3,Ache,Usp45,Cln6,Idh1,Ube4b,Fbxo46,Usp36,Enpp7,Wipi1,Rpia,Asb8,Fzr1,Smurf1,Phyh,Aldoc,Pxdn,Dera,Dcps,Lonp1,Bcat2,Oxct1,Atg4a,Ube2s,Fbxo8,Cln3,Shh,Ube2q1,Asb2,1500002O20Rik,Skp2,Fbxl16,Pja2,Uspl1,Fbxo16,Smg7,Herc2,Enc1,Usp5
GO:0007040	5	lysosome organization	16	0.0011	4	0.0094	0.0008939	E	Cln6,Tpp1,Cln3,Acp2
GO:0043170	3	macromolecule metabolic process	5310	0.3622	180	0.4235	0.0012171	E	P2rx7,Suv420h2,Cdca3,Polr2e,Nars2,Papolb,L3mbtl2,Ache,Zfp455,Med24,Wnk1,Bccip,Rngtt,Eif4e3,Usp45,Pprc1,Prepl,Ifi30,Hmgb2,Trpc2,Adamts4,Cln6,Zfp94,Dpm2,Isy1,Phrf1,Ube4b,Mbd4,Rrp9,Gtpbp3,Foxh1,Aurkb,Fbxo46,Dclre1c,Usp36,Capg,Zfpm1,Jund,Xrn1,Nsun2,Sox8,Hinfp,Gins2,Rpia,Nmt1,Kcnip3,Tcea2,Asb8,Gsk3a,Fzr1,Smurf1,Gtf2f1,Zfp157,Rpl7,Tpp1,Nfkbia,Ddit3,Eef1g,Aldoc,Zcrb1,Snw1,Mst1r,Pigv,Uba52,Dhx29,Ssbp2,Ei…
GO:0043283	4	biopolymer metabolic process	5146	0.351	175	0.4118	0.0012517	E	P2rx7,Suv420h2,Cdca3,Polr2e,Nars2,Papolb,L3mbtl2,Ache,Zfp455,Med24,Wnk1,Bccip,Rngtt,Eif4e3,Usp45,Pprc1,Prepl,Ifi30,Hmgb2,Trpc2,Adamts4,Cln6,Zfp94,Dpm2,Isy1,Phrf1,Ube4b,Mbd4,Rrp9,Gtpbp3,Foxh1,Aurkb,Fbxo46,Dclre1c,Usp36,Capg,Zfpm1,Jund,Xrn1,Nsun2,Sox8,Hinfp,Gins2,Nmt1,Kcnip3,Tcea2,Asb8,Gsk3a,Fzr1,Smurf1,Gtf2f1,Zfp157,Rpl7,Tpp1,Nfkbia,Ddit3,Eef1g,Zcrb1,Snw1,Mst1r,Pigv,Uba52,Dhx29,Ssbp2,Eif2c2,Arid3b…
GO:0006139	4	nucleobase, nucleoside, nucleotide and nucleic acid metabolic process	3112	0.2123	113	0.2659	0.0012648	E	Suv420h2,Polr2e,Nars2,Papolb,L3mbtl2,Zfp455,Med24,Bccip,Rngtt,Pprc1,Hmgb2,Trpc2,Zfp94,Isy1,Phrf1,Mbd4,Nudt5,Rrp9,Gtpbp3,Foxh1,Dclre1c,Zfpm1,Jund,Xrn1,Nsun2,Sox8,Hinfp,Gins2,Rpia,Kcnip3,Tcea2,Mtap,Nt5c3,Gtf2f1,Zfp157,Nfkbia,Ddit3,Zcrb1,Snw1,Ssbp2,Eif2c2,Atp5c1,Dera,Arid3b,Sap30l,Dcps,Rpa2,Npas4,Chtf18,Larp7,Lonp1,Zfp869,Klf3,Wdtc1,Xab2,Dnaja3,Sirt4,Sox12,Ttll5,Cdc6,Hexim1,Sox9,Bat1a,Ablim2,Rpusd1,…
GO:0016043	2	cellular component organization	1801	0.1229	71	0.1671	0.0013998	E	Trip10,P2rx7,Suv420h2,Cno,Lsp1,Cdca3,L3mbtl2,Ache,Pfn3,Hist1h2ah,Cln6,Cdc42ep1,Ipo4,Eps15l1,Aurkb,Dtnbp1,Dclre1c,Capg,Xrn1,Oip5,Fmnl1,Nrp1,Tuba1b,Nusap1,Rab5b,Caly,Mad1l1,A4galt,Smyd3,Fzr1,Tpp1,Chrna1,Katna1,Katnb1,Nefh,Stxbp1,Tssk6,Gapvd1,Dnaja3,Cdc6,Sox9,Fech,Ablim2,Cln3,Hook2,Shh,Serpinh1,Tbce,Tubb2b,Arpc2,Smarcal1,Metrn,Npm1,Tubb3,Rpgrip1l,Timeless,Herc2,Ptcd2,Vav2,Lrp11,Brsk1,Spnb4,Prkcz,Acp…
GO:0007033	4	vacuole organization	18	0.0012	4	0.0094	0.0014177	E	Cln6,Tpp1,Cln3,Acp2
GO:0060602	6,5	branch elongation of an epithelium	9	0.0006	3	0.0071	0.0017061	E	Sox9,Shh,Rdh10
GO:0022402	4,3	cell cycle process	377	0.0257	21	0.0494	0.0018335	E	Cdca3,Meig1,Cdc123,Sesn2,Aurkb,Xrn1,Oip5,Nusap1,Mad1l1,Fzr1,Ddit3,Katna1,Katnb1,Cdc6,Skp2,Npm1,Timeless,Herc2,Brsk1,Pmp22,Cgref1
GO:0006412	7,5,6	translation	362	0.0247	20	0.0471	0.0024713	E	Nars2,Eif4e3,Rpl7,Eef1g,Uba52,Dhx29,Eif2c2,Rps21,Aimp1,Rpl35a,Mrpl47,Fech,Eif2b5,Rpl37a,Rpl7l1,Gspt1,Yars,Lars2,Eef1a2,Tnrc6b
GO:0007049	3	cell cycle	640	0.0437	30	0.0706	0.0030145	E	Cdca3,Meig1,Cdc123,Sesn2,Bccip,Aurkb,Dlgap5,Xrn1,Oip5,Nusap1,Mad1l1,Fzr1,Ddit3,Katna1,Arl3,Katnb1,Chtf18,Sik1,Cdc6,Hspa8,Skp2,Npm1,Timeless,Herc2,Brsk1,E2f2,Mcm6,Pmp22,Cgref1,Appl2
GO:0065008	3	regulation of biological quality	1045	0.0713	44	0.1035	0.0030483	E	P2rx7,Srd5a1,Ache,Syn3,Ifi30,Mfi2,Trpc2,Cln6,Cdc42ep1,Dtnbp1,Dclre1c,Capg,Xrn1,Emp1,Slc30a1,Itpr1,Chrna1,Ddit3,Anxa5,Wdtc1,Stx4a,Dnaja3,Sirt4,Ctrc,Fech,Cln3,Th,Shh,F7,4930506M07Rik,Arpc2,Txn2,Ccdc47,Npm1,Ppp3cb,Gch1,Ikbkb,Rdh10,Evl,Pmp22,Ghrh,Fancc,Actr3b,Cldn11
GO:0006461	5,4	protein complex assembly	178	0.0121	12	0.0282	0.0036942	E	P2rx7,Ache,Ipo4,Capg,Tuba1b,Tbce,Tubb2b,Arpc2,Npm1,Tubb3,Evl,Actr3b
GO:0070271	3	protein complex biogenesis	178	0.0121	12	0.0282	0.0036942	E	P2rx7,Ache,Ipo4,Capg,Tuba1b,Tbce,Tubb2b,Arpc2,Npm1,Tubb3,Evl,Actr3b
GO:0060560	5,4	developmental growth involved in morphogenesis	12	0.0008	3	0.0071	0.0040932	E	Sox9,Shh,Rdh10
GO:0009058	3	biosynthetic process	3382	0.2307	117	0.2753	0.004181	E	P2rx7,Suv420h2,Srd5a1,Polr2e,Coq6,Nars2,Papolb,L3mbtl2,Ache,Zfp455,Med24,Eif4e3,Pprc1,Hmgb2,Agpat4,Cln6,Zfp94,Dpm2,Phrf1,Hsd17b7,Foxh1,Zfpm1,Jund,Sox8,Hinfp,Gins2,Nmt1,Kcnip3,Tcea2,Uros,A4galt,Gtf2f1,Zfp157,Rpl7,Nfkbia,Ddit3,Eef1g,Snw1,Pigv,Cdipt,Uba52,Dhx29,Ssbp2,Eif2c2,Arid3b,Sap30l,Rpa2,Npas4,Rps21,Aimp1,Cbs,Chtf18,Bcat2,Zfp869,Klf3,Wdtc1,Rpl35a,Xab2,Mrpl47,Dnaja3,Sirt4,Sox12,Car5a,Ttll5,Accs,…
GO:0000278	4	mitotic cell cycle	255	0.0174	15	0.0353	0.0044004	E	Cdca3,Cdc123,Aurkb,Oip5,Nusap1,Mad1l1,Fzr1,Katna1,Katnb1,Sik1,Cdc6,Skp2,Timeless,Herc2,Brsk1
GO:0060737	6,7,8,9,5	prostate gland morphogenetic growth	4	0.0003	2	0.0047	0.0047456	E	Sox9,Shh
GO:0051258	7,6	protein polymerization	78	0.0053	7	0.0165	0.0055249	E	Capg,Tuba1b,Tubb2b,Arpc2,Tubb3,Evl,Actr3b
GO:0051726	5,4	regulation of cell cycle	145	0.0099	10	0.0235	0.0063261	E	Bccip,Nusap1,Fzr1,Sik1,Hspa8,Skp2,Npm1,Herc2,Brsk1,E2f2
GO:0019725	5,3	cellular homeostasis	293	0.02	16	0.0376	0.006356	E	P2rx7,Mfi2,Trpc2,Cln6,Slc30a1,Itpr1,Chrna1,Ddit3,Wdtc1,Ctrc,Cln3,4930506M07Rik,Txn2,Npm1,Pmp22,Cldn11
GO:0001776	6,3	leukocyte homeostasis	43	0.0029	5	0.0118	0.0063736	E	P2rx7,Dnaja3,Ppp3cb,Ikbkb,Fancc
GO:0046851	7,5,6	negative regulation of bone remodeling	14	0.001	3	0.0071	0.0063878	E	P2rx7,Smurf1,Sox9
GO:0046849	4	bone remodeling	61	0.0042	6	0.0141	0.0064413	E	P2rx7,Slc34a1,Jund,Smurf1,Sox9,Tob2
GO:0055066	8	di-, tri-valent inorganic cation homeostasis	123	0.0084	9	0.0212	0.0064864	E	P2rx7,Mfi2,Trpc2,Slc30a1,Itpr1,Ctrc,Fech,Cln3,Ccdc47
GO:0009056	3	catabolic process	1352	0.0922	52	0.1224	0.006807	E	P2rx7,Cdca3,Ache,Usp45,Prepl,Adamts4,Cln6,Idh1,Ube4b,Fbxo46,Usp36,Enpp7,Wipi1,Rpia,Asb8,Fzr1,Smurf1,Phyh,Tpp1,Aldoc,Plbd2,Pxdn,Dera,Dcps,Lonp1,Bcat2,Oxct1,Cpa2,Atg4a,Ube2s,Fbxo8,Ctrc,Dpp7,Cln3,Shh,F7,Ube2q1,Asb2,1500002O20Rik,Skp2,Fbxl16,Pja2,Psmd3,Uspl1,Fbxo16,Smg7,Herc2,Enc1,Usp5,Lysmd3,Plcxd3,Pla2g6
GO:0050801	6	ion homeostasis	248	0.0169	14	0.0329	0.0076537	E	P2rx7,Mfi2,Trpc2,Cln6,Slc30a1,Itpr1,Chrna1,Ctrc,Fech,Cln3,4930506M07Rik,Ccdc47,Pmp22,Cldn11
GO:0065003	4	macromolecular complex assembly	327	0.0223	17	0.04	0.0077354	E	P2rx7,Ache,Hist1h2ah,Ipo4,Capg,Tuba1b,Fech,Tbce,Tubb2b,Arpc2,Npm1,Tubb3,Evl,H3f3b,Hist1h4j,H2afy2,Actr3b
GO:0034104	6,4,5	negative regulation of tissue remodeling	15	0.001	3	0.0071	0.0077547	E	P2rx7,Smurf1,Sox9
GO:0007017	3	microtubule-based process	174	0.0119	11	0.0259	0.0078308	E	Tuba1b,Nusap1,Katna1,Kif2c,Nefh,Hook2,Tbce,Tubb2b,Npm1,Tubb3,Prkcz
GO:0044265	5	cellular macromolecule catabolic process	608	0.0415	27	0.0635	0.0078978	E	Cdca3,Usp45,Cln6,Ube4b,Fbxo46,Usp36,Rpia,Asb8,Fzr1,Smurf1,Aldoc,Dcps,Ube2s,Fbxo8,Shh,Ube2q1,Asb2,1500002O20Rik,Skp2,Fbxl16,Pja2,Uspl1,Fbxo16,Smg7,Herc2,Enc1,Usp5
GO:0055082	6,4	cellular chemical homeostasis	225	0.0153	13	0.0306	0.0082352	E	P2rx7,Mfi2,Trpc2,Cln6,Slc30a1,Itpr1,Chrna1,Wdtc1,Ctrc,Cln3,4930506M07Rik,Pmp22,Cldn11
GO:0030278	5,7,6,8,4	regulation of ossification	46	0.0031	5	0.0118	0.0083159	E	P2rx7,Jund,Smurf1,Sox9,Tob2
GO:0055080	7	cation homeostasis	152	0.0104	10	0.0235	0.0083978	E	P2rx7,Mfi2,Trpc2,Cln6,Slc30a1,Itpr1,Ctrc,Fech,Cln3,Ccdc47
GO:0043623	6,5	cellular protein complex assembly	129	0.0088	9	0.0212	0.0084857	E	Ipo4,Capg,Tuba1b,Tbce,Tubb2b,Arpc2,Tubb3,Evl,Actr3b
GO:0007010	4	cytoskeleton organization	305	0.0208	16	0.0376	0.0086849	E	Lsp1,Pfn3,Capg,Fmnl1,Nusap1,Katna1,Nefh,Ablim2,Hook2,Shh,Tbce,Arpc2,Npm1,Prkcz,Evl,Actr3b
GO:0000226	5,4	microtubule cytoskeleton organization	87	0.0059	7	0.0165	0.0094048	E	Nusap1,Katna1,Nefh,Hook2,Tbce,Npm1,Prkcz
GO:0001505	4,6,7	regulation of neurotransmitter levels	67	0.0046	6	0.0141	0.0097206	E	P2rx7,Ache,Syn3,Stx4a,Cln3,Th
GO:0002260	7,4	lymphocyte homeostasis	31	0.0021	4	0.0094	0.0099747	E	P2rx7,Dnaja3,Ppp3cb,Ikbkb
GO:0019226	5	transmission of nerve impulse	233	0.0159	13	0.0306	0.010415	E	P2rx7,Ache,Syn3,Chrna1,Sv2c,Stxbp1,Vdac3,Stx4a,Cln3,Th,Spnb4,Pmp22,Cldn11
GO:0044249	4	cellular biosynthetic process	3325	0.2268	111	0.2612	0.0107531	E	P2rx7,Suv420h2,Srd5a1,Polr2e,Coq6,Nars2,Papolb,L3mbtl2,Zfp455,Med24,Eif4e3,Pprc1,Hmgb2,Agpat4,Cln6,Zfp94,Dpm2,Phrf1,Hsd17b7,Foxh1,Zfpm1,Jund,Sox8,Hinfp,Gins2,Nmt1,Kcnip3,Tcea2,Uros,Gtf2f1,Zfp157,Rpl7,Nfkbia,Ddit3,Eef1g,Snw1,Pigv,Cdipt,Uba52,Dhx29,Ssbp2,Eif2c2,Arid3b,Sap30l,Rpa2,Npas4,Rps21,Aimp1,Cbs,Chtf18,Bcat2,Zfp869,Klf3,Wdtc1,Rpl35a,Xab2,Mrpl47,Dnaja3,Sirt4,Sox12,Car5a,Ttll5,Cdc6,Hexim1,Sox9,…
GO:0050684	8,7,9,6	regulation of mRNA processing	6	0.0004	2	0.0047	0.0111889	E	Npm1,Ptcd2
GO:0008209	7,6,5	androgen metabolic process	6	0.0004	2	0.0047	0.0111889	E	Srd5a1,Shh
GO:0044085	2	cellular component biogenesis	574	0.0392	25	0.0588	0.0117142	E	P2rx7,Ache,Hist1h2ah,Mrto4,Ipo4,Rrp9,Capg,Tuba1b,Rrs1,Nefh,Fech,Tbce,Tubb2b,Arpc2,Npm1,Tubb3,Rpgrip1l,Vav2,Evl,Pmp22,H3f3b,Hist1h4j,H2afy2,Actr3b,Naf1
GO:0009987	2	cellular process	11167	0.7618	338	0.7953	0.0119704	E	Ap2s1,Gpbar1,Trip10,P2rx7,Suv420h2,Cno,Lsp1,Cdca3,Srd5a1,Meig1,Homer3,Lphn1,Polr2e,Traf5,Cdc123,Coq6,Nars2,Rangap1,Ndufa13,Ctf1,Pcdh1,Papolb,L3mbtl2,Sesn2,Blvrb,Ache,Zfp455,Gng2,Med24,Wnk1,Bccip,Rngtt,Pfn3,Hist1h2ah,Eif4e3,Syn3,Usp45,Gmip,Slc7a5,Cyth1,Pprc1,Ap3s2,Ifi30,Hmgb2,Scarb2,Mfi2,Trpc2,Agpat4,Arhgef15,Cln6,Rab18,Oprl1,Zfp94,Mrto4,Dpm2,Cdc42ep1,Ipo4,Idh1,Isy1,Eps15l1,Phrf1,Ap3m2,Ube4b,Mbd4,…
GO:0044267	6,5	cellular protein metabolic process	2121	0.1447	74	0.1741	0.0120958	E	P2rx7,Suv420h2,Cdca3,Nars2,Ache,Wnk1,Rngtt,Eif4e3,Usp45,Cln6,Dpm2,Ube4b,Aurkb,Fbxo46,Usp36,Capg,Nmt1,Asb8,Gsk3a,Fzr1,Smurf1,Rpl7,Eef1g,Mst1r,Pigv,Uba52,Dhx29,Eif2c2,Tor3a,Rps21,Aimp1,Cbs,Tssk6,Ube2s,Rpl35a,Mrpl47,Abi1,Fbxo8,Dnaja3,Sirt4,Ttll5,Sik1,Hspa8,Fech,Cln3,Eif2b5,Shh,Ube2q1,Rpl37a,Asb2,Araf,Tbce,Skp2,Arpc2,Rpl7l1,Fbxl16,Gspt1,Cdc42bpg,Pja2,Yars,Uspl1,Fbxo16,Herc2,Ppp3cb,Ikbkb,Lars2,Brsk1,E…
GO:0014032	6,7,9,10,8	neural crest cell development	33	0.0023	4	0.0094	0.012236	E	Nrp2,Sox9,Shh,Rdh10
GO:0014033	6,8,9,7	neural crest cell differentiation	33	0.0023	4	0.0094	0.012236	E	Nrp2,Sox9,Shh,Rdh10
GO:0016070	6,5	RNA metabolic process	2221	0.1515	77	0.1812	0.0122501	E	Suv420h2,Nars2,Papolb,L3mbtl2,Med24,Rngtt,Pprc1,Hmgb2,Isy1,Phrf1,Rrp9,Gtpbp3,Foxh1,Zfpm1,Jund,Xrn1,Nsun2,Sox8,Hinfp,Kcnip3,Tcea2,Gtf2f1,Ddit3,Zcrb1,Snw1,Ssbp2,Eif2c2,Arid3b,Sap30l,Dcps,Npas4,Larp7,Klf3,Wdtc1,Xab2,Sirt4,Sox12,Hexim1,Sox9,Bat1a,Ablim2,Rpusd1,Shh,Nkx2-2,Zscan20,Hnrpll,Myt1,1500002O20Rik,Klf11,Kin,Tef,Sp2,Bdp1,Hnrnph1,Tsen54,Yars,Npm1,Skiv2l2,Zfp354c,Btf3,Smg7,Leo1,Timeless,Ptcd2,Hr,…
GO:0046850	6,5	regulation of bone remodeling	51	0.0035	5	0.0118	0.0123171	E	P2rx7,Jund,Smurf1,Sox9,Tob2
GO:0051246	6,5	regulation of protein metabolic process	349	0.0238	17	0.04	0.01273	E	P2rx7,Ache,Eif4e3,Cln6,Capg,Eif2c2,Cbs,Ube2s,Fech,Cln3,Shh,Ube2q1,Arpc2,Psmd3,Evl,Tnrc6b,Actr3b
GO:0042133	5,7,8,4	neurotransmitter metabolic process	18	0.0012	3	0.0071	0.0127392	E	Ache,Cln3,Th
GO:0015807	6,7,8	L-amino acid transport	18	0.0012	3	0.0071	0.0127392	E	P2rx7,Slc7a5,Slc36a1
GO:0034962	6	cellular biopolymer catabolic process	551	0.0376	24	0.0565	0.0129549	E	Cdca3,Usp45,Ube4b,Fbxo46,Usp36,Asb8,Fzr1,Smurf1,Dcps,Ube2s,Fbxo8,Shh,Ube2q1,Asb2,1500002O20Rik,Skp2,Fbxl16,Pja2,Uspl1,Fbxo16,Smg7,Herc2,Enc1,Usp5
GO:0006511	10,8,9	ubiquitin-dependent protein catabolic process	116	0.0079	8	0.0188	0.0129989	E	Usp45,Ube4b,Usp36,Fbxo8,Shh,Skp2,Uspl1,Usp5
GO:0022403	5,4	cell cycle phase	324	0.0221	16	0.0376	0.0135009	E	Cdca3,Meig1,Cdc123,Aurkb,Xrn1,Oip5,Nusap1,Mad1l1,Fzr1,Katna1,Katnb1,Cdc6,Skp2,Timeless,Herc2,Brsk1
GO:0000280	5	nuclear division	191	0.013	11	0.0259	0.0137287	E	Cdca3,Aurkb,Oip5,Nusap1,Mad1l1,Fzr1,Katna1,Katnb1,Cdc6,Timeless,Herc2
GO:0007067	6,8,7,5	mitosis	191	0.013	11	0.0259	0.0137287	E	Cdca3,Aurkb,Oip5,Nusap1,Mad1l1,Fzr1,Katna1,Katnb1,Cdc6,Timeless,Herc2
GO:0022607	3	cellular component assembly	467	0.0319	21	0.0494	0.0137661	E	P2rx7,Ache,Hist1h2ah,Ipo4,Capg,Tuba1b,Nefh,Fech,Tbce,Tubb2b,Arpc2,Npm1,Tubb3,Rpgrip1l,Vav2,Evl,Pmp22,H3f3b,Hist1h4j,H2afy2,Actr3b
GO:0007267	4	cell-cell signaling	353	0.0241	17	0.04	0.0138259	E	P2rx7,Ache,Syn3,Dlgap5,Chrna1,Sv2c,Stxbp1,Vdac3,Stx4a,Sirt4,Cln3,Th,Shh,Spnb4,Pmp22,Ghrh,Cldn11
GO:0000087	7,5,6	M phase of mitotic cell cycle	192	0.0131	11	0.0259	0.0141463	E	Cdca3,Aurkb,Oip5,Nusap1,Mad1l1,Fzr1,Katna1,Katnb1,Cdc6,Timeless,Herc2
GO:0006873	7,5	cellular ion homeostasis	218	0.0149	12	0.0282	0.0141703	E	P2rx7,Mfi2,Trpc2,Cln6,Slc30a1,Itpr1,Chrna1,Ctrc,Cln3,4930506M07Rik,Pmp22,Cldn11
GO:0034961	6	cellular biopolymer biosynthetic process	2575	0.1757	87	0.2047	0.0143014	E	Suv420h2,Polr2e,Nars2,Papolb,L3mbtl2,Zfp455,Med24,Eif4e3,Pprc1,Hmgb2,Zfp94,Phrf1,Foxh1,Zfpm1,Jund,Sox8,Hinfp,Gins2,Kcnip3,Tcea2,Gtf2f1,Zfp157,Rpl7,Nfkbia,Ddit3,Eef1g,Snw1,Uba52,Dhx29,Ssbp2,Eif2c2,Arid3b,Sap30l,Rpa2,Npas4,Rps21,Aimp1,Chtf18,Zfp869,Klf3,Wdtc1,Rpl35a,Xab2,Mrpl47,Dnaja3,Sirt4,Sox12,Ttll5,Cdc6,Hexim1,Sox9,Fech,Ablim2,Zfp84,Eif2b5,Shh,Rpl37a,Nkx2-2,Polr1a,Zscan20,Myt1,Rpl7l1,Klf11,Kin,…
GO:0043284	5	biopolymer biosynthetic process	2576	0.1757	87	0.2047	0.0143873	E	Suv420h2,Polr2e,Nars2,Papolb,L3mbtl2,Zfp455,Med24,Eif4e3,Pprc1,Hmgb2,Zfp94,Phrf1,Foxh1,Zfpm1,Jund,Sox8,Hinfp,Gins2,Kcnip3,Tcea2,Gtf2f1,Zfp157,Rpl7,Nfkbia,Ddit3,Eef1g,Snw1,Uba52,Dhx29,Ssbp2,Eif2c2,Arid3b,Sap30l,Rpa2,Npas4,Rps21,Aimp1,Chtf18,Zfp869,Klf3,Wdtc1,Rpl35a,Xab2,Mrpl47,Dnaja3,Sirt4,Sox12,Ttll5,Cdc6,Hexim1,Sox9,Fech,Ablim2,Zfp84,Eif2b5,Shh,Rpl37a,Nkx2-2,Polr1a,Zscan20,Myt1,Rpl7l1,Klf11,Kin,…
GO:0043029	8,5	T cell homeostasis	19	0.0013	3	0.0071	0.0146917	E	P2rx7,Dnaja3,Ppp3cb
GO:0000184	10,9	nuclear-transcribed mRNA catabolic process, nonsense-mediated decay	19	0.0013	3	0.0071	0.0146917	E	Dcps,1500002O20Rik,Smg7
GO:0016050	4	vesicle organization	35	0.0024	4	0.0094	0.0147684	E	P2rx7,Cno,Dtnbp1,Stxbp1
GO:0006983	8,7,6,4	ER overload response	7	0.0005	2	0.0047	0.0152123	E	Ddit3,Ccdc47
GO:0048285	4	organelle fission	195	0.0133	11	0.0259	0.0154478	E	Cdca3,Aurkb,Oip5,Nusap1,Mad1l1,Fzr1,Katna1,Katnb1,Cdc6,Timeless,Herc2
GO:0055074	9	calcium ion homeostasis	76	0.0052	6	0.0141	0.0163817	E	P2rx7,Trpc2,Itpr1,Ctrc,Cln3,Ccdc47
GO:0007242	6,5	intracellular signaling cascade	967	0.066	37	0.0871	0.0163937	E	P2rx7,Gmip,Cyth1,Arhgef15,Rab18,Cdc42ep1,Phrf1,Mbd4,Arf2,Rab5b,Sh2d3c,Asb8,Ddit3,Arl3,Cbs,Cnih4,Gapvd1,Fbxo8,Dnaja3,Cyth3,Sik1,Arhgef1,Asb2,Araf,Skp2,Gnai2,Cdc42bpg,Ccdc47,Npm1,Rab11a,Vav2,Ikbkb,Brsk1,Prkcz,Ghrh,Plcxd3,Rsu1
GO:0030003	8,6	cellular cation homeostasis	122	0.0083	8	0.0188	0.0165456	E	P2rx7,Mfi2,Trpc2,Cln6,Slc30a1,Itpr1,Ctrc,Cln3
GO:0009059	4	macromolecule biosynthetic process	2768	0.1888	92	0.2165	0.0166137	E	Suv420h2,Polr2e,Nars2,Papolb,L3mbtl2,Ache,Zfp455,Med24,Eif4e3,Pprc1,Hmgb2,Zfp94,Dpm2,Phrf1,Foxh1,Zfpm1,Jund,Sox8,Hinfp,Gins2,Nmt1,Kcnip3,Tcea2,Gtf2f1,Zfp157,Rpl7,Nfkbia,Ddit3,Eef1g,Snw1,Pigv,Uba52,Dhx29,Ssbp2,Eif2c2,Arid3b,Sap30l,Rpa2,Npas4,Rps21,Aimp1,Chtf18,Zfp869,Klf3,Wdtc1,Rpl35a,Xab2,Mrpl47,Dnaja3,Sirt4,Sox12,Ttll5,Cdc6,Hexim1,Sox9,Fech,Ablim2,Zfp84,Eif2b5,Shh,Rpl37a,Nkx2-2,Polr1a,Zscan20,Se…
GO:0042592	4	homeostatic process	568	0.0387	24	0.0565	0.0167047	E	P2rx7,Mfi2,Trpc2,Cln6,Dclre1c,Xrn1,Slc30a1,Itpr1,Chrna1,Ddit3,Wdtc1,Dnaja3,Ctrc,Fech,Cln3,4930506M07Rik,Txn2,Ccdc47,Npm1,Ppp3cb,Ikbkb,Pmp22,Fancc,Cldn11
GO:0043933	3	macromolecular complex subunit organization	364	0.0248	17	0.04	0.017147	E	P2rx7,Ache,Hist1h2ah,Ipo4,Capg,Tuba1b,Fech,Tbce,Tubb2b,Arpc2,Npm1,Tubb3,Evl,H3f3b,Hist1h4j,H2afy2,Actr3b
GO:0034103	5,4	regulation of tissue remodeling	56	0.0038	5	0.0118	0.0173101	E	P2rx7,Jund,Smurf1,Sox9,Tob2
GO:0019941	9,7,8	modification-dependent protein catabolic process	483	0.0329	21	0.0494	0.0178617	E	Cdca3,Usp45,Ube4b,Fbxo46,Usp36,Asb8,Fzr1,Smurf1,Ube2s,Fbxo8,Shh,Ube2q1,Asb2,Skp2,Fbxl16,Pja2,Uspl1,Fbxo16,Herc2,Enc1,Usp5
GO:0043632	6	modification-dependent macromolecule catabolic process	483	0.0329	21	0.0494	0.0178617	E	Cdca3,Usp45,Ube4b,Fbxo46,Usp36,Asb8,Fzr1,Smurf1,Ube2s,Fbxo8,Shh,Ube2q1,Asb2,Skp2,Fbxl16,Pja2,Uspl1,Fbxo16,Herc2,Enc1,Usp5
GO:0009116	6	nucleoside metabolic process	21	0.0014	3	0.0071	0.0190193	E	Mtap,Cda,Qtrt1
GO:0051090	8,6,9,7	regulation of transcription factor activity	38	0.0026	4	0.0094	0.019073	E	Nfkbia,Dnaja3,Shh,Ikbkb
GO:0031330	7,5,6	negative regulation of cellular catabolic process	8	0.0005	2	0.0047	0.0196975	E	Cln3,Shh
GO:0006884	6,4	cell volume homeostasis	8	0.0005	2	0.0047	0.0196975	E	P2rx7,Npm1
GO:0060441	7,9,8,10,6	branching involved in lung morphogenesis	8	0.0005	2	0.0047	0.0196975	E	Shh,Rdh10
GO:0014003	6,9,7,10,8	oligodendrocyte development	8	0.0005	2	0.0047	0.0196975	E	Shh,Nkx2-2
GO:0032088	10,8,11,9	negative regulation of NF-kappaB transcription factor activity	8	0.0005	2	0.0047	0.0196975	E	Nfkbia,Dnaja3
GO:0045778	6,8,7,9,4,5	positive regulation of ossification	8	0.0005	2	0.0047	0.0196975	E	P2rx7,Tob2
GO:0048878	5	chemical homeostasis	315	0.0215	15	0.0353	0.0200117	E	P2rx7,Mfi2,Trpc2,Cln6,Slc30a1,Itpr1,Chrna1,Wdtc1,Ctrc,Fech,Cln3,4930506M07Rik,Ccdc47,Pmp22,Cldn11
GO:0032268	6,7,5	regulation of cellular protein metabolic process	291	0.0199	14	0.0329	0.0218413	E	P2rx7,Ache,Eif4e3,Cln6,Capg,Eif2c2,Cbs,Fech,Cln3,Shh,Arpc2,Evl,Tnrc6b,Actr3b
GO:0051603	8,7	proteolysis involved in cellular protein catabolic process	497	0.0339	21	0.0494	0.0219843	E	Cdca3,Usp45,Ube4b,Fbxo46,Usp36,Asb8,Fzr1,Smurf1,Ube2s,Fbxo8,Shh,Ube2q1,Asb2,Skp2,Fbxl16,Pja2,Uspl1,Fbxo16,Herc2,Enc1,Usp5
GO:0034645	5	cellular macromolecule biosynthetic process	2761	0.1883	90	0.2118	0.0224398	E	Suv420h2,Polr2e,Nars2,Papolb,L3mbtl2,Zfp455,Med24,Eif4e3,Pprc1,Hmgb2,Zfp94,Dpm2,Phrf1,Foxh1,Zfpm1,Jund,Sox8,Hinfp,Gins2,Nmt1,Kcnip3,Tcea2,Gtf2f1,Zfp157,Rpl7,Nfkbia,Ddit3,Eef1g,Snw1,Pigv,Uba52,Dhx29,Ssbp2,Eif2c2,Arid3b,Sap30l,Rpa2,Npas4,Rps21,Aimp1,Chtf18,Zfp869,Klf3,Wdtc1,Rpl35a,Xab2,Mrpl47,Dnaja3,Sirt4,Sox12,Ttll5,Cdc6,Hexim1,Sox9,Fech,Ablim2,Zfp84,Eif2b5,Shh,Rpl37a,Nkx2-2,Polr1a,Zscan20,Myt1,Rp…
GO:0019538	5,4	protein metabolic process	2592	0.1768	85	0.2	0.022456	E	P2rx7,Suv420h2,Cdca3,Nars2,Ache,Wnk1,Rngtt,Eif4e3,Usp45,Prepl,Ifi30,Adamts4,Cln6,Dpm2,Ube4b,Aurkb,Fbxo46,Usp36,Capg,Nmt1,Asb8,Gsk3a,Fzr1,Smurf1,Rpl7,Tpp1,Eef1g,Mst1r,Pigv,Uba52,Dhx29,Eif2c2,Tor3a,Rps21,Aimp1,Cbs,Lonp1,Tssk6,Cpa2,Ube2s,Rpl35a,Mrpl47,Abi1,Fbxo8,Dnaja3,Sirt4,Ttll5,Sik1,Ctrc,Dpp7,Hspa8,Fech,Cln3,Eif2b5,Shh,F7,Ube2q1,Rpl37a,Asb2,Serpinh1,Araf,Tbce,Skp2,Arpc2,Rpl7l1,Fbxl16,Gspt1,Cdc42b…
GO:0006399	8,7	tRNA metabolic process	106	0.0072	7	0.0165	0.0225546	E	Nars2,Gtpbp3,Nsun2,Tsen54,Yars,Lars2,Qtrt1
GO:0044257	7,6	cellular protein catabolic process	499	0.034	21	0.0494	0.022613	E	Cdca3,Usp45,Ube4b,Fbxo46,Usp36,Asb8,Fzr1,Smurf1,Ube2s,Fbxo8,Shh,Ube2q1,Asb2,Skp2,Fbxl16,Pja2,Uspl1,Fbxo16,Herc2,Enc1,Usp5
GO:0010324	4	membrane invagination	184	0.0126	10	0.0235	0.0236245	E	Trip10,P2rx7,Ache,Eps15l1,Rab5b,Caly,Stxbp1,Gapvd1,Shh,Lrp11
GO:0006897	5,4,6	endocytosis	184	0.0126	10	0.0235	0.0236245	E	Trip10,P2rx7,Ache,Eps15l1,Rab5b,Caly,Stxbp1,Gapvd1,Shh,Lrp11
GO:0009057	4	macromolecule catabolic process	1039	0.0709	38	0.0894	0.0238182	E	P2rx7,Cdca3,Usp45,Prepl,Adamts4,Cln6,Ube4b,Fbxo46,Usp36,Rpia,Asb8,Fzr1,Smurf1,Tpp1,Aldoc,Dcps,Lonp1,Cpa2,Ube2s,Fbxo8,Ctrc,Dpp7,Cln3,Shh,F7,Ube2q1,Asb2,1500002O20Rik,Skp2,Fbxl16,Pja2,Psmd3,Uspl1,Fbxo16,Smg7,Herc2,Enc1,Usp5
GO:0051301	3	cell division	267	0.0182	13	0.0306	0.02385	E	Cdca3,Cdc123,Aurkb,Oip5,Nusap1,Mad1l1,Fzr1,Katna1,Arl3,Katnb1,Cdc6,Timeless,Cdc40
GO:0030162	7,8,6	regulation of proteolysis	23	0.0016	3	0.0071	0.0238865	E	Cln6,Cln3,Shh
GO:0046852	7,5,6	positive regulation of bone remodeling	9	0.0006	2	0.0047	0.0245942	E	P2rx7,Tob2
GO:0006400	10,8,9,7	tRNA modification	9	0.0006	2	0.0047	0.0245942	E	Gtpbp3,Qtrt1
GO:0002076	5,6,7,9	osteoblast development	9	0.0006	2	0.0047	0.0245942	E	Jund,Shh
GO:0043584	6,7	nose development	9	0.0006	2	0.0047	0.0245942	E	Rpgrip1l,Rdh10
GO:0051241	5,3,4	negative regulation of multicellular organismal process	85	0.0058	6	0.0141	0.0252072	E	P2rx7,Cd83,Smurf1,Stxbp1,Anxa5,Sox9
GO:0043285	5	biopolymer catabolic process	982	0.067	36	0.0847	0.0254212	E	P2rx7,Cdca3,Usp45,Prepl,Adamts4,Cln6,Ube4b,Fbxo46,Usp36,Asb8,Fzr1,Smurf1,Tpp1,Dcps,Lonp1,Cpa2,Ube2s,Fbxo8,Ctrc,Dpp7,Cln3,Shh,F7,Ube2q1,Asb2,1500002O20Rik,Skp2,Fbxl16,Pja2,Psmd3,Uspl1,Fbxo16,Smg7,Herc2,Enc1,Usp5
GO:0042176	6,7,5	regulation of protein catabolic process	42	0.0029	4	0.0094	0.0257312	E	Cln6,Cln3,Shh,Psmd3
GO:0009892	5,3,4	negative regulation of metabolic process	478	0.0326	20	0.0471	0.0257519	E	Foxh1,Capg,Zfpm1,Kcnip3,Snw1,Eif2c2,Wdtc1,Sirt4,Sox9,Cln3,Shh,Skp2,Klf11,Npm1,Timeless,Hr,Gchfr,Evl,Tnrc6b,Purb
GO:0055065	8	metal ion homeostasis	86	0.0059	6	0.0141	0.0263187	E	P2rx7,Trpc2,Itpr1,Ctrc,Cln3,Ccdc47
GO:0016192	3,4,5	vesicle-mediated transport	419	0.0286	18	0.0424	0.0263468	E	Ap2s1,Trip10,P2rx7,Ache,Ap3s2,Eps15l1,Ap3m2,Arf2,Rab5b,Caly,Stxbp1,Gapvd1,Exoc4,Stx4a,Ergic1,Shh,Ap4e1,Lrp11
GO:0030005	9,7	cellular di-, tri-valent inorganic cation homeostasis	111	0.0076	7	0.0165	0.0271707	E	P2rx7,Mfi2,Trpc2,Slc30a1,Itpr1,Ctrc,Cln3
GO:0033043	5,4	regulation of organelle organization	112	0.0076	7	0.0165	0.0281493	E	Capg,Nusap1,Arpc2,Npm1,Herc2,Evl,Actr3b
GO:0008380	8,7,6	RNA splicing	191	0.013	10	0.0235	0.028255	E	Isy1,Zcrb1,Snw1,Xab2,Bat1a,Hnrnph1,Npm1,Skiv2l2,Cwc22,Cdc40
GO:0034622	5,4	cellular macromolecular complex assembly	276	0.0188	13	0.0306	0.0285345	E	Hist1h2ah,Ipo4,Capg,Tuba1b,Tbce,Tubb2b,Arpc2,Tubb3,Evl,H3f3b,Hist1h4j,H2afy2,Actr3b
GO:0006407	5,10,9,6,8,7	rRNA export from nucleus	1	0.0001	1	0.0024	0.0289924	E	Npm1
GO:0014049	6,7,8,5,4,9	positive regulation of glutamate secretion	1	0.0001	1	0.0024	0.0289924	E	P2rx7
GO:0032229	9,10,7,8	negative regulation of synaptic transmission, GABAergic	1	0.0001	1	0.0024	0.0289924	E	Stxbp1
GO:0014916	5,7	regulation of lung blood pressure	1	0.0001	1	0.0024	0.0289924	E	Gch1
GO:0060020	9,10,7,8	Bergmann glial cell differentiation	1	0.0001	1	0.0024	0.0289924	E	Shh
GO:0060517	5,8,9,10,11,7	epithelial cell proliferation involved in prostatic bud elongation	1	0.0001	1	0.0024	0.0289924	E	Sox9
GO:0032309	5,6	icosanoid secretion	1	0.0001	1	0.0024	0.0289924	E	P2rx7
GO:0009052	10,7,11,12,13,8	pentose-phosphate shunt, non-oxidative branch	1	0.0001	1	0.0024	0.0289924	E	Rpia
GO:0045212	7,8,6	neurotransmitter receptor biosynthetic process	1	0.0001	1	0.0024	0.0289924	E	Ache
GO:0046654	7,8,9	tetrahydrofolate biosynthetic process	1	0.0001	1	0.0024	0.0289924	E	Gch1
GO:0014856	6	skeletal muscle cell proliferation	1	0.0001	1	0.0024	0.0289924	E	Shh
GO:0032732	7,5,6	positive regulation of interleukin-1 production	1	0.0001	1	0.0024	0.0289924	E	P2rx7
GO:0044256	4	protein digestion	1	0.0001	1	0.0024	0.0289924	E	P2rx7
GO:0032310	8,6,9,7	prostaglandin secretion	1	0.0001	1	0.0024	0.0289924	E	P2rx7
GO:0060449	7,8,10,9,11,6	bud elongation involved in lung branching	1	0.0001	1	0.0024	0.0289924	E	Rdh10
GO:0009299	9,7,8	mRNA transcription	1	0.0001	1	0.0024	0.0289924	E	Ddit3
GO:0048047	5,6	mating behavior, sex discrimination	1	0.0001	1	0.0024	0.0289924	E	Trpc2
GO:0032308	7,8,9,10,6,11,5	positive regulation of prostaglandin secretion	1	0.0001	1	0.0024	0.0289924	E	P2rx7
GO:0006585	9,10,8,7	dopamine biosynthetic process from tyrosine	1	0.0001	1	0.0024	0.0289924	E	Th
GO:0060431	5,7,8,10,9,11,6	primary lung bud formation	1	0.0001	1	0.0024	0.0289924	E	Rdh10
GO:0002124	5,6	territorial aggressive behavior	1	0.0001	1	0.0024	0.0289924	E	Trpc2
GO:0051901	6,11,12,7,9,10,4,5	positive regulation of mitochondrial depolarization	1	0.0001	1	0.0024	0.0289924	E	P2rx7
GO:0000056	6,7,10,8,9	ribosomal small subunit export from nucleus	1	0.0001	1	0.0024	0.0289924	E	Npm1
GO:0019343	9,10,8	cysteine biosynthetic process via cystathionine	1	0.0001	1	0.0024	0.0289924	E	Cbs
GO:0042305	8,7,9,10,6	specification of segmental identity, mandibular segment	1	0.0001	1	0.0024	0.0289924	E	Rpgrip1l
GO:0032305	7,8,6,5	positive regulation of icosanoid secretion	1	0.0001	1	0.0024	0.0289924	E	P2rx7
GO:0032303	7,6	regulation of icosanoid secretion	1	0.0001	1	0.0024	0.0289924	E	P2rx7
GO:0043132	5,6	NAD transport	1	0.0001	1	0.0024	0.0289924	E	P2rx7
GO:0007380	7,6,8,9,5	specification of segmental identity, head	1	0.0001	1	0.0024	0.0289924	E	Rpgrip1l
GO:0035287	6,7,5,8,4	head segmentation	1	0.0001	1	0.0024	0.0289924	E	Rpgrip1l
GO:0014858	7,8,5,6	positive regulation of skeletal muscle cell proliferation	1	0.0001	1	0.0024	0.0289924	E	Shh
GO:0034405	4	response to fluid shear stress	1	0.0001	1	0.0024	0.0289924	E	P2rx7
GO:0051029	5,7,6,8	rRNA transport	1	0.0001	1	0.0024	0.0289924	E	Npm1
GO:0046931	3	pore complex biogenesis	1	0.0001	1	0.0024	0.0289924	E	P2rx7
GO:0042789	10,8,9	mRNA transcription from RNA polymerase II promoter	1	0.0001	1	0.0024	0.0289924	E	Ddit3
GO:0000290	10,11,9	deadenylation-dependent decapping of nuclear-transcribed mRNA	1	0.0001	1	0.0024	0.0289924	E	Dcps
GO:0007228	10,9,7,8,6,11	positive regulation of hh target transcription factor activity	1	0.0001	1	0.0024	0.0289924	E	Shh
GO:0006581	7,9,10,8,6	acetylcholine catabolic process	1	0.0001	1	0.0024	0.0289924	E	Ache
GO:0040001	7,5,4,6	establishment of mitotic spindle localization	1	0.0001	1	0.0024	0.0289924	E	Nusap1
GO:0009589	6,7	detection of UV	1	0.0001	1	0.0024	0.0289924	E	Fech
GO:0044266	5	multicellular organismal macromolecule catabolic process	1	0.0001	1	0.0024	0.0289924	E	P2rx7
GO:0034379	7	very-low-density lipoprotein particle assembly	1	0.0001	1	0.0024	0.0289924	E	Fech
GO:0006535	9,8,10	cysteine biosynthetic process from serine	1	0.0001	1	0.0024	0.0289924	E	Cbs
GO:0002121	5,6	inter-male aggressive behavior	1	0.0001	1	0.0024	0.0289924	E	Trpc2
GO:0014889	6	muscle atrophy	1	0.0001	1	0.0024	0.0289924	E	Tbce
GO:0007382	8,7,9,10,6	specification of segmental identity, maxillary segment	1	0.0001	1	0.0024	0.0289924	E	Rpgrip1l
GO:0000046	5,8,7,9	autophagic vacuole fusion	1	0.0001	1	0.0024	0.0289924	E	Cln3
GO:0032800	5	receptor biosynthetic process	1	0.0001	1	0.0024	0.0289924	E	Ache
GO:0032731	8,6,7	positive regulation of interleukin-1 beta production	1	0.0001	1	0.0024	0.0289924	E	P2rx7
GO:0032306	7,8,9,6,10	regulation of prostaglandin secretion	1	0.0001	1	0.0024	0.0289924	E	P2rx7
GO:0032964	5,6	collagen biosynthetic process	1	0.0001	1	0.0024	0.0289924	E	Serpinh1
GO:0035289	7,8,6,9,5	posterior head segmentation	1	0.0001	1	0.0024	0.0289924	E	Rpgrip1l
GO:0008050	6,7	female courtship behavior	1	0.0001	1	0.0024	0.0289924	E	Trpc2
GO:0048936	7,9,8,12,10,13,11	peripheral nervous system neuron axonogenesis	1	0.0001	1	0.0024	0.0289924	E	Tbce
GO:0007227	8,6,7,5	signal transduction downstream of smoothened	1	0.0001	1	0.0024	0.0289924	E	Shh
GO:0002118	4,5	aggressive behavior	1	0.0001	1	0.0024	0.0289924	E	Trpc2
GO:0035092	4,6,8,9,10,7	sperm chromatin condensation	1	0.0001	1	0.0024	0.0289924	E	Tssk6
GO:0044254	7,6,5	multicellular organismal protein catabolic process	1	0.0001	1	0.0024	0.0289924	E	P2rx7
GO:0014857	6,7,5	regulation of skeletal muscle cell proliferation	1	0.0001	1	0.0024	0.0289924	E	Shh
GO:0000956	9,8	nuclear-transcribed mRNA catabolic process	25	0.0017	3	0.0071	0.0292583	E	Dcps,1500002O20Rik,Smg7
GO:0010605	6,4,5	negative regulation of macromolecule metabolic process	457	0.0312	19	0.0447	0.0293278	E	Foxh1,Capg,Zfpm1,Kcnip3,Snw1,Eif2c2,Wdtc1,Sirt4,Sox9,Cln3,Shh,Skp2,Klf11,Npm1,Timeless,Hr,Evl,Tnrc6b,Purb
GO:0007368	7,6	determination of left/right symmetry	44	0.003	4	0.0094	0.0294355	E	Foxh1,Fto,Shh,Rpgrip1l
GO:0030833	9,8,7,10,6	regulation of actin filament polymerization	44	0.003	4	0.0094	0.0294355	E	Capg,Arpc2,Evl,Actr3b
GO:0007617	4,5	mating behavior	10	0.0007	2	0.0047	0.0298551	E	Trpc2,Th
GO:0045861	8,9,6,7	negative regulation of proteolysis	10	0.0007	2	0.0047	0.0298551	E	Cln3,Shh
GO:0007009	4	plasma membrane organization	10	0.0007	2	0.0047	0.0298551	E	P2rx7,A4galt
GO:0030279	6,8,7,9,4,5	negative regulation of ossification	10	0.0007	2	0.0047	0.0298551	E	Smurf1,Sox9
GO:0007268	5,6	synaptic transmission	194	0.0132	10	0.0235	0.0303735	E	P2rx7,Ache,Syn3,Chrna1,Sv2c,Stxbp1,Vdac3,Stx4a,Cln3,Th
GO:0048771	3	tissue remodeling	90	0.0061	6	0.0141	0.031014	E	P2rx7,Slc34a1,Jund,Smurf1,Sox9,Tob2
GO:0009799	5,4	determination of symmetry	45	0.0031	4	0.0094	0.0313766	E	Foxh1,Fto,Shh,Rpgrip1l
GO:0009855	6,5	determination of bilateral symmetry	45	0.0031	4	0.0094	0.0313766	E	Foxh1,Fto,Shh,Rpgrip1l
GO:0048489	4,5,6	synaptic vesicle transport	26	0.0018	3	0.0071	0.0321208	E	P2rx7,Stxbp1,Stx4a
GO:0000279	6,5	M phase	284	0.0194	13	0.0306	0.0330563	E	Cdca3,Meig1,Aurkb,Xrn1,Oip5,Nusap1,Mad1l1,Fzr1,Katna1,Katnb1,Cdc6,Timeless,Herc2
GO:0007050	5,4	cell cycle arrest	46	0.0031	4	0.0094	0.0333749	E	Sesn2,Ddit3,Pmp22,Cgref1
GO:0014031	5,6,8,9,7	mesenchymal cell development	46	0.0031	4	0.0094	0.0333749	E	Nrp2,Sox9,Shh,Rdh10
GO:0048519	4,2,3	negative regulation of biological process	1118	0.0763	39	0.0918	0.033626	E	P2rx7,Ifi30,Foxh1,Capg,Zfpm1,Cd83,Nrp1,Kcnip3,Smurf1,Bag3,Nfkbia,Snw1,Dad1,Apbb3,Eif2c2,Stxbp1,Anxa5,Wdtc1,Sirt4,Tmbim6,Dkk1,Sox9,Nphp3,Cln3,Shh,Nkx2-2,Skp2,Klf11,Npm1,Ddit4,Timeless,Ppp3cb,Hr,Gchfr,Eef1a2,Tob2,Evl,Tnrc6b,Purb
GO:0051716	3	cellular response to stimulus	468	0.0319	19	0.0447	0.0337955	E	P2rx7,Bccip,Trpc2,Mbd4,Dclre1c,Gsk3a,Ddit3,Pxdn,Cbs,Wdtc1,Xab2,Fech,Cln3,Kin,Smug1,Ccdc47,Npm1,Brsk1,Fancc
GO:0033554	4	cellular response to stress	376	0.0256	16	0.0376	0.0340946	E	Bccip,Trpc2,Mbd4,Dclre1c,Ddit3,Pxdn,Cbs,Xab2,Fech,Cln3,Kin,Smug1,Ccdc47,Npm1,Brsk1,Fancc
GO:0006520	5,6	cellular amino acid metabolic process	172	0.0117	9	0.0212	0.0347847	E	Nars2,Gls2,Cbs,Bcat2,Cln3,Th,Yars,Lars2,Adc
GO:0007596	6,4,5	blood coagulation	69	0.0047	5	0.0118	0.0348445	E	Dtnbp1,Anxa5,Shh,F7,Evl
GO:0032502	2	developmental process	2915	0.1989	91	0.2141	0.0349583	E	P2rx7,Srd5a1,Traf5,Ctf1,Ache,Slc7a5,Hmgb2,Cdc42ep1,Mbd4,Foxh1,Dtnbp1,Dclre1c,Zfpm1,Jund,Xrn1,Cd83,Sox8,Phc2,Nrp1,Slc30a1,Utrn,Fzd3,Nmt1,Kcnip3,Nrp2,Smurf1,Itpr1,Bag3,Nfkbia,Chrna1,Ddit3,Ccr4,Dad1,Apbb3,Katna1,Eif2c2,Fto,Arid3b,Wdr5,Stxbp1,Tssk6,Fscn2,Wdtc1,Xab2,Abi1,Dnaja3,Sik1,Tmbim6,Hexim1,Dkk1,Sox9,Nphp3,Fech,Cln3,Th,Shh,Nkx2-2,4930506M07Rik,Myt1,Tbce,Skp2,Klf11,Metrn,Ccdc47,Btf3,Rpgrip1l,Unc4…
GO:0060255	5,4	regulation of macromolecule metabolic process	2289	0.1561	73	0.1718	0.0350843	E	P2rx7,Suv420h2,L3mbtl2,Ache,Med24,Eif4e3,Pprc1,Ifi30,Hmgb2,Cln6,Mbd4,Foxh1,Capg,Zfpm1,Jund,Sox8,Hinfp,Kcnip3,Tcea2,Gtf2f1,Nfkbia,Ddit3,Snw1,Ssbp2,Eif2c2,Arid3b,Sap30l,Npas4,Cbs,Klf3,Wdtc1,Ube2s,Dnaja3,Sirt4,Sox12,Hexim1,Sox9,Fech,Ablim2,Cln3,Shh,Ube2q1,Nkx2-2,Zscan20,Myt1,Skp2,Arpc2,Klf11,Tef,Sp2,Bdp1,Psmd3,Npm1,Zfp354c,Btf3,Leo1,Timeless,Ptcd2,Ppp3cb,Hr,Ikbkb,E2f2,Mcm6,Tob2,Evl,Tnrc6b,Zfp524,Etv…
GO:0010564	6,5,4	regulation of cell cycle process	47	0.0032	4	0.0094	0.0354286	E	Nusap1,Fzr1,Npm1,Herc2
GO:0007215	7,6	glutamate signaling pathway	11	0.0008	2	0.0047	0.0354359	E	Homer3,Cln3
GO:0009119	7	ribonucleoside metabolic process	11	0.0008	2	0.0047	0.0354359	E	Cda,Qtrt1
GO:0045109	6,5	intermediate filament organization	11	0.0008	2	0.0047	0.0354359	E	Nefh,Shh
GO:0006629	4	lipid metabolic process	664	0.0453	25	0.0588	0.0356462	E	P2rx7,Srd5a1,Agpat4,Cln6,Dpm2,Hsd17b7,Enpp7,A4galt,Phyh,Plbd2,Pigv,Cdipt,Pip5kl1,Wdtc1,Acsf3,Nphp3,Fech,Shh,0610007P14Rik,Asah1,Vav2,Plcxd3,Pla2g6,Apob48r,Acly
GO:0007599	5,4	hemostasis	70	0.0048	5	0.0118	0.0364446	E	Dtnbp1,Anxa5,Shh,F7,Evl
GO:0030163	6,5	protein catabolic process	930	0.0634	33	0.0776	0.0365349	E	P2rx7,Cdca3,Usp45,Prepl,Adamts4,Cln6,Ube4b,Fbxo46,Usp36,Asb8,Fzr1,Smurf1,Tpp1,Lonp1,Cpa2,Ube2s,Fbxo8,Ctrc,Dpp7,Cln3,Shh,F7,Ube2q1,Asb2,Skp2,Fbxl16,Pja2,Psmd3,Uspl1,Fbxo16,Herc2,Enc1,Usp5
GO:0007264	7,6	small GTPase mediated signal transduction	381	0.026	16	0.0376	0.0365807	E	Cyth1,Arhgef15,Rab18,Cdc42ep1,Arf2,Rab5b,Sh2d3c,Arl3,Gapvd1,Fbxo8,Dnaja3,Cyth3,Arhgef1,Rab11a,Vav2,Rsu1
GO:0016044	3	membrane organization	261	0.0178	12	0.0282	0.0370944	E	Trip10,P2rx7,Ache,Eps15l1,Rab5b,Caly,A4galt,Stxbp1,Gapvd1,Cln3,Shh,Lrp11
GO:0043254	6,5,4	regulation of protein complex assembly	48	0.0033	4	0.0094	0.0375358	E	Capg,Arpc2,Evl,Actr3b
GO:0008064	9,8,7,6,5	regulation of actin polymerization or depolymerization	48	0.0033	4	0.0094	0.0375358	E	Capg,Arpc2,Evl,Actr3b
GO:0032271	8,7,6,5	regulation of protein polymerization	48	0.0033	4	0.0094	0.0375358	E	Capg,Arpc2,Evl,Actr3b
GO:0006508	7,6	proteolysis	901	0.0615	32	0.0753	0.0376791	E	P2rx7,Cdca3,Usp45,Prepl,Adamts4,Cln6,Ube4b,Fbxo46,Usp36,Asb8,Fzr1,Smurf1,Tpp1,Lonp1,Cpa2,Ube2s,Fbxo8,Ctrc,Dpp7,Cln3,Shh,F7,Ube2q1,Asb2,Skp2,Fbxl16,Pja2,Uspl1,Fbxo16,Herc2,Enc1,Usp5
GO:0051234	2,3	establishment of localization	2276	0.1553	72	0.1694	0.0377717	E	Ap2s1,Trip10,P2rx7,Ndufa13,Ache,Wnk1,Syn3,Slc7a5,Slc34a1,Slc25a39,Ap3s2,Mfi2,Bicd1,Trpc2,Rbp7,Rab18,Ipo4,Eps15l1,Ap3m2,Cnga3,Nup188,Arf2,Slc30a1,Kcnh6,Nusap1,Rab5b,Caly,Ndufs2,Kcnip3,Nup54,Pllp,Syngr1,Ndufb5,Itpr1,Nfkbia,Chrna1,Slc22a18,Atp5c1,Sv2c,Stxbp1,Vdac3,Clca6,Atg4a,Gapvd1,Exoc4,Tmed9,Stx4a,Sirt4,Sec24c,Ergic1,Golim4,Cln3,Hook2,Shh,Slc25a4,Txn2,Npm1,Rab11a,Slc35a4,Ap4e1,Atp5j2,Lrp11,Cnnm3,…
GO:0009451	7,6	RNA modification	28	0.0019	3	0.0071	0.0381715	E	Gtpbp3,Rpusd1,Qtrt1
GO:0034660	7,6	ncRNA metabolic process	176	0.012	9	0.0212	0.0382616	E	Nars2,Rrp9,Gtpbp3,Nsun2,Tsen54,Yars,Lars2,Qtrt1,Naf1
GO:0019222	4,3	regulation of metabolic process	2493	0.1701	78	0.1835	0.0385067	E	P2rx7,Suv420h2,L3mbtl2,Ache,Med24,Bccip,Eif4e3,Pprc1,Ifi30,Hmgb2,Cln6,Mbd4,Foxh1,Capg,Zfpm1,Jund,Sox8,Hinfp,Kcnip3,Tcea2,Gtf2f1,Nfkbia,Ddit3,Snw1,Ssbp2,Eif2c2,Arid3b,Sap30l,Npas4,Cbs,Klf3,Wdtc1,Ube2s,Dnaja3,Sirt4,Sox12,Hexim1,Sox9,Fech,Ablim2,Cln3,Shh,Ube2q1,Nkx2-2,Zscan20,Myt1,Skp2,Arpc2,Klf11,Tef,Gnai2,Sp2,Bdp1,Psmd3,Npm1,Zfp354c,Btf3,Leo1,Timeless,Ptcd2,Vav2,Ppp3cb,Hr,Ikbkb,Gchfr,E2f2,Mcm6,Tob…
GO:0030832	8,7,5,6	regulation of actin filament length	49	0.0033	4	0.0094	0.0396946	E	Capg,Arpc2,Evl,Actr3b
GO:0048762	5,7,8,6	mesenchymal cell differentiation	49	0.0033	4	0.0094	0.0396946	E	Nrp2,Sox9,Shh,Rdh10
GO:0050817	3	coagulation	72	0.0049	5	0.0118	0.0397404	E	Dtnbp1,Anxa5,Shh,F7,Evl
GO:0006874	10,8	cellular calcium ion homeostasis	72	0.0049	5	0.0118	0.0397404	E	P2rx7,Trpc2,Itpr1,Ctrc,Cln3
GO:0006259	6,5	DNA metabolic process	388	0.0265	16	0.0376	0.0401718	E	Bccip,Trpc2,Mbd4,Dclre1c,Xrn1,Gins2,Rpa2,Chtf18,Xab2,Dnaja3,Cdc6,Gin1,Kin,Smug1,Mcm6,Fancc
GO:0006810	3,4	transport	2263	0.1544	71	0.1671	0.0404206	E	Ap2s1,Trip10,P2rx7,Ndufa13,Ache,Wnk1,Syn3,Slc7a5,Slc34a1,Slc25a39,Ap3s2,Mfi2,Bicd1,Trpc2,Rbp7,Rab18,Ipo4,Eps15l1,Ap3m2,Cnga3,Nup188,Arf2,Slc30a1,Kcnh6,Rab5b,Caly,Ndufs2,Kcnip3,Nup54,Pllp,Syngr1,Ndufb5,Itpr1,Nfkbia,Chrna1,Slc22a18,Atp5c1,Sv2c,Stxbp1,Vdac3,Clca6,Atg4a,Gapvd1,Exoc4,Tmed9,Stx4a,Sirt4,Sec24c,Ergic1,Golim4,Cln3,Hook2,Shh,Slc25a4,Txn2,Npm1,Rab11a,Slc35a4,Ap4e1,Atp5j2,Lrp11,Cnnm3,Sfxn2,E…
GO:0060572	9,8,10,7	morphogenesis of an epithelial bud	12	0.0008	2	0.0047	0.0412951	E	Shh,Rdh10
GO:0031076	8,9,3,4,5	embryonic camera-type eye development	12	0.0008	2	0.0047	0.0412951	E	Th,Rdh10
GO:0001914	11,6,9,8,10,5,7	regulation of T cell mediated cytotoxicity	12	0.0008	2	0.0047	0.0412951	E	P2rx7,Ppp3cb
GO:0060736	7,6,8,4	prostate gland growth	12	0.0008	2	0.0047	0.0412951	E	Sox9,Shh
GO:0051085	10,9	chaperone mediated protein folding requiring cofactor	12	0.0008	2	0.0047	0.0412951	E	Tor3a,Hspa8
GO:0006914	5	autophagy	29	0.002	3	0.0071	0.0413478	E	Wipi1,Atg4a,Cln3
GO:0051480	11,9	cytosolic calcium ion homeostasis	29	0.002	3	0.0071	0.0413478	E	P2rx7,Trpc2,Cln3
GO:0030041	8,7,6,5	actin filament polymerization	50	0.0034	4	0.0094	0.041903	E	Capg,Arpc2,Evl,Actr3b
GO:0060485	6,7,5	mesenchyme development	50	0.0034	4	0.0094	0.041903	E	Nrp2,Sox9,Shh,Rdh10
GO:0015031	4,5,6	protein transport	651	0.0444	24	0.0565	0.0424889	E	Ap2s1,P2rx7,Ap3s2,Rab18,Ipo4,Ap3m2,Nup188,Arf2,Rab5b,Nup54,Syngr1,Nfkbia,Stxbp1,Atg4a,Gapvd1,Exoc4,Stx4a,Sec24c,Hook2,Shh,Rab11a,Ap4e1,Nup93,Stam2
GO:0007507	5,6	heart development	211	0.0144	10	0.0235	0.0437165	E	Foxh1,Zfpm1,Nrp1,Nrp2,Hexim1,Sox9,Th,Shh,Ptcd2,Ppp3cb
GO:0010638	6,4,5	positive regulation of organelle organization	30	0.002	3	0.0071	0.0446169	E	Nusap1,Arpc2,Npm1
GO:0045184	3,4,5	establishment of protein localization	658	0.0449	24	0.0565	0.045024	E	Ap2s1,P2rx7,Ap3s2,Rab18,Ipo4,Ap3m2,Nup188,Arf2,Rab5b,Nup54,Syngr1,Nfkbia,Stxbp1,Atg4a,Gapvd1,Exoc4,Stx4a,Sec24c,Hook2,Shh,Rab11a,Ap4e1,Nup93,Stam2
GO:0042254	4	ribosome biogenesis	101	0.0069	6	0.0141	0.0457907	E	Mrto4,Ipo4,Rrp9,Rrs1,Npm1,Naf1
GO:0080090	5,4	regulation of primary metabolic process	2278	0.1554	70	0.1647	0.0459046	E	P2rx7,Suv420h2,L3mbtl2,Ache,Med24,Eif4e3,Pprc1,Hmgb2,Cln6,Foxh1,Capg,Zfpm1,Jund,Sox8,Hinfp,Kcnip3,Tcea2,Gtf2f1,Nfkbia,Ddit3,Snw1,Ssbp2,Eif2c2,Arid3b,Sap30l,Npas4,Cbs,Klf3,Wdtc1,Ube2s,Dnaja3,Sirt4,Sox12,Hexim1,Sox9,Fech,Ablim2,Cln3,Shh,Ube2q1,Nkx2-2,Zscan20,Myt1,Arpc2,Klf11,Tef,Gnai2,Sp2,Bdp1,Psmd3,Npm1,Zfp354c,Btf3,Leo1,Timeless,Ptcd2,Vav2,Hr,Ikbkb,E2f2,Mcm6,Evl,Tnrc6b,Zfp524,Etv5,Ghrh,Purb,Ascc1…
GO:0006886	6,5,7	intracellular protein transport	305	0.0208	13	0.0306	0.0462453	E	Ap2s1,Ap3s2,Ipo4,Ap3m2,Nup188,Nup54,Syngr1,Nfkbia,Stx4a,Shh,Ap4e1,Nup93,Stam2
GO:0032535	4	regulation of cellular component size	52	0.0035	4	0.0094	0.0464601	E	Capg,Arpc2,Evl,Actr3b
GO:0051101	5	regulation of DNA binding	52	0.0035	4	0.0094	0.0464601	E	Nfkbia,Dnaja3,Shh,Ikbkb
GO:0007275	3	multicellular organismal development	2476	0.1689	75	0.1765	0.0471365	E	P2rx7,Ctf1,Ache,Slc7a5,Hmgb2,Foxh1,Dtnbp1,Dclre1c,Zfpm1,Jund,Cd83,Sox8,Phc2,Nrp1,Slc30a1,Utrn,Fzd3,Nmt1,Nrp2,Smurf1,Itpr1,Nfkbia,Chrna1,Ccr4,Dad1,Katna1,Eif2c2,Fto,Arid3b,Wdr5,Stxbp1,Tssk6,Fscn2,Wdtc1,Xab2,Abi1,Dnaja3,Sik1,Hexim1,Dkk1,Sox9,Nphp3,Fech,Th,Shh,Nkx2-2,4930506M07Rik,Myt1,Tbce,Klf11,Metrn,Ccdc47,Btf3,Rpgrip1l,Unc45a,Prph2,Timeless,Ptcd2,Ppp3cb,Brsk1,Enc1,Rdh10,Spnb4,Tob2,Acp2,Evl,Pmp22…
GO:0001913	10,4,8,9,5,7,6	T cell mediated cytotoxicity	13	0.0009	2	0.0047	0.0473939	E	P2rx7,Ppp3cb
GO:0006783	7,8,5	heme biosynthetic process	13	0.0009	2	0.0047	0.0473939	E	Uros,Fech
GO:0030010	6,7,4,8	establishment of cell polarity	13	0.0009	2	0.0047	0.0473939	E	Shh,Brsk1
GO:0043433	9,7,10,8	negative regulation of transcription factor activity	13	0.0009	2	0.0047	0.0473939	E	Nfkbia,Dnaja3
GO:0006904	7,5,6,8	vesicle docking during exocytosis	13	0.0009	2	0.0047	0.0473939	E	Stxbp1,Exoc4
GO:0034105	6,4,5	positive regulation of tissue remodeling	13	0.0009	2	0.0047	0.0473939	E	P2rx7,Tob2
GO:0051179	2	localization	2671	0.1822	80	0.1882	0.0476165	E	Ap2s1,Trip10,P2rx7,Ndufa13,Ache,Wnk1,Syn3,Slc7a5,Slc34a1,Slc25a39,Ap3s2,Mfi2,Bicd1,Trpc2,Rbp7,Rab18,Ipo4,Eps15l1,Ap3m2,Cnga3,Nup188,Arf2,Fmnl1,Nrp1,Slc30a1,Kcnh6,Nusap1,Rab5b,Caly,Ndufs2,Kcnip3,Nrp2,Nup54,Pllp,Syngr1,Ndufb5,Itpr1,Nfkbia,Chrna1,Slc22a18,Ccr4,Katna1,Atp5c1,Sv2c,Aimp1,Stxbp1,Vdac3,Clca6,Atg4a,Gapvd1,Exoc4,Tmed9,Stx4a,Sirt4,Sec24c,Ergic1,Golim4,Cln3,Hook2,Shh,Slc25a4,Txn2,Npm1,Rab11a…
GO:0006402	8,7	mRNA catabolic process	31	0.0021	3	0.0071	0.0479723	E	Dcps,1500002O20Rik,Smg7
GO:0010629	7,5,6	negative regulation of gene expression	339	0.0231	14	0.0329	0.0480136	E	Foxh1,Zfpm1,Kcnip3,Snw1,Eif2c2,Wdtc1,Sirt4,Sox9,Skp2,Klf11,Timeless,Hr,Tnrc6b,Purb
GO:0034621	4,3	cellular macromolecular complex subunit organization	308	0.021	13	0.0306	0.0482497	E	Hist1h2ah,Ipo4,Capg,Tuba1b,Tbce,Tubb2b,Arpc2,Tubb3,Evl,H3f3b,Hist1h4j,H2afy2,Actr3b
GO:0006260	7,6	DNA replication	130	0.0089	7	0.0165	0.0485503	E	Gins2,Rpa2,Chtf18,Dnaja3,Cdc6,Kin,Mcm6
GO:0055086	5	nucleobase, nucleoside and nucleotide metabolic process	278	0.019	12	0.0282	0.0489866	E	Rpia,Mtap,Nt5c3,Atp5c1,Dera,Lonp1,Gnai2,Atp5j2,Ampd3,Cda,Ghrh,Qtrt1
GO:0010468	6,5	regulation of gene expression	2019	0.1377	62	0.1459	0.0492861	E	Suv420h2,L3mbtl2,Med24,Eif4e3,Pprc1,Ifi30,Hmgb2,Mbd4,Foxh1,Zfpm1,Jund,Sox8,Hinfp,Kcnip3,Tcea2,Gtf2f1,Nfkbia,Ddit3,Snw1,Ssbp2,Eif2c2,Arid3b,Sap30l,Npas4,Klf3,Wdtc1,Dnaja3,Sirt4,Sox12,Hexim1,Sox9,Fech,Ablim2,Cln3,Shh,Nkx2-2,Zscan20,Myt1,Skp2,Klf11,Tef,Sp2,Bdp1,Npm1,Zfp354c,Btf3,Leo1,Timeless,Ptcd2,Ppp3cb,Hr,Ikbkb,E2f2,Mcm6,Tob2,Tnrc6b,Zfp524,Etv5,Purb,H2afy2,Ascc1,Fiz1
GO:0016125	5,6,7	sterol metabolic process	78	0.0053	5	0.0118	0.0503194	E	Cln6,Hsd17b7,Fech,0610007P14Rik,Apob48r
GO:0051493	6,5	regulation of cytoskeleton organization	78	0.0053	5	0.0118	0.0503194	E	Capg,Arpc2,Npm1,Evl,Actr3b
GO:0080135	5,6,4	regulation of cellular response to stress	54	0.0037	4	0.0094	0.0511895	E	Cbs,Fech,Cln3,Npm1
GO:0006401	7,6	RNA catabolic process	32	0.0022	3	0.0071	0.0514078	E	Dcps,1500002O20Rik,Smg7
GO:0042391	8,6	regulation of membrane potential	105	0.0072	6	0.0141	0.0517363	E	P2rx7,Chrna1,Cln3,4930506M07Rik,Pmp22,Cldn11
GO:0006350	7,5	transcription	2108	0.1438	63	0.1482	0.0533335	E	Suv420h2,Polr2e,Papolb,L3mbtl2,Zfp455,Med24,Pprc1,Hmgb2,Zfp94,Phrf1,Foxh1,Zfpm1,Jund,Sox8,Hinfp,Kcnip3,Tcea2,Gtf2f1,Zfp157,Nfkbia,Ddit3,Snw1,Ssbp2,Eif2c2,Arid3b,Sap30l,Npas4,Zfp869,Klf3,Wdtc1,Xab2,Dnaja3,Sirt4,Sox12,Ttll5,Hexim1,Sox9,Ablim2,Zfp84,Shh,Nkx2-2,Polr1a,Zscan20,Myt1,Klf11,Tef,Sp2,Bdp1,Zfp354c,Btf3,Leo1,Timeless,Hr,Ikbkb,E2f2,Mcm6,Zfp524,Etv5,Zfp81,Polr3f,Purb,Ascc1,Fiz1
GO:0050657	5,6	nucleic acid transport	55	0.0038	4	0.0094	0.053613	E	Nup188,Nup54,Npm1,Nup93
GO:0032956	7,6,5	regulation of actin cytoskeleton organization	55	0.0038	4	0.0094	0.053613	E	Capg,Arpc2,Evl,Actr3b
GO:0050658	4,6,5,7	RNA transport	55	0.0038	4	0.0094	0.053613	E	Nup188,Nup54,Npm1,Nup93
GO:0051236	3,4,5	establishment of RNA localization	55	0.0038	4	0.0094	0.053613	E	Nup188,Nup54,Npm1,Nup93
GO:0008154	5,7,6,4	actin polymerization or depolymerization	55	0.0038	4	0.0094	0.053613	E	Capg,Arpc2,Evl,Actr3b
GO:0009894	5,4	regulation of catabolic process	55	0.0038	4	0.0094	0.053613	E	Cln6,Cln3,Shh,Psmd3
GO:0048278	4,5,6	vesicle docking	14	0.001	2	0.0047	0.0536959	E	Stxbp1,Exoc4
GO:0000209	10,11,9	protein polyubiquitination	14	0.001	2	0.0047	0.0536959	E	Ube4b,Skp2
GO:0042177	7,8,5,6	negative regulation of protein catabolic process	14	0.001	2	0.0047	0.0536959	E	Cln3,Shh
GO:0022406	3	membrane docking	14	0.001	2	0.0047	0.0536959	E	Stxbp1,Exoc4
GO:0016079	6,7,8,9,5	synaptic vesicle exocytosis	14	0.001	2	0.0047	0.0536959	E	P2rx7,Stx4a
GO:0006875	9,7	cellular metal ion homeostasis	80	0.0055	5	0.0118	0.0540471	E	P2rx7,Trpc2,Itpr1,Ctrc,Cln3
GO:0007601	8	visual perception	107	0.0073	6	0.0141	0.0548012	E	Cln6,Cnga3,Dtnbp1,Th,Prph2,Rdh10
GO:0008104	4	protein localization	756	0.0516	26	0.0612	0.055384	E	Ap2s1,P2rx7,Ap3s2,Rab18,Ipo4,Ap3m2,Nup188,Arf2,Rab5b,Nup54,Syngr1,Nfkbia,Katna1,Stxbp1,Atg4a,Gapvd1,Exoc4,Stx4a,Sec24c,Hook2,Shh,Npm1,Rab11a,Ap4e1,Nup93,Stam2
GO:0048856	3	anatomical structure development	2121	0.1447	62	0.1459	0.0554241	E	P2rx7,Ctf1,Ache,Slc7a5,Hmgb2,Cdc42ep1,Foxh1,Dtnbp1,Dclre1c,Zfpm1,Jund,Cd83,Sox8,Nrp1,Utrn,Fzd3,Nrp2,Smurf1,Nfkbia,Chrna1,Ccr4,Dad1,Katna1,Fto,Wdr5,Stxbp1,Fscn2,Xab2,Dnaja3,Hexim1,Dkk1,Sox9,Nphp3,Fech,Th,Shh,Nkx2-2,Myt1,Tbce,Klf11,Metrn,Rpgrip1l,Unc45a,Prph2,Timeless,Ptcd2,Ppp3cb,Brsk1,Rdh10,Spnb4,Tob2,Acp2,Evl,Pmp22,Etv5,Pphln1,Ghrh,Dfna5,Il11ra1,Cst6,Cldn11,N4bp2l2
GO:0051128	4,3	regulation of cellular component organization	256	0.0175	11	0.0259	0.0560156	E	Cdc42ep1,Capg,Nrp1,Nusap1,Rab5b,Arpc2,Metrn,Npm1,Herc2,Evl,Actr3b
GO:0032970	5,4	regulation of actin filament-based process	56	0.0038	4	0.0094	0.0560727	E	Capg,Arpc2,Evl,Actr3b
GO:0006403	4	RNA localization	56	0.0038	4	0.0094	0.0560727	E	Nup188,Nup54,Npm1,Nup93
GO:0016567	9,10,8	protein ubiquitination	56	0.0038	4	0.0094	0.0560727	E	Ube4b,Smurf1,Skp2,Herc2
GO:0006102	6	isocitrate metabolic process	2	0.0001	1	0.0024	0.0563076	E	Idh1
GO:0006097	6,5,8	glyoxylate cycle	2	0.0001	1	0.0024	0.0563076	E	Idh1
GO:0006370	9,8,7	mRNA capping	2	0.0001	1	0.0024	0.0563076	E	Rngtt
GO:0060458	6,7,8	right lung development	2	0.0001	1	0.0024	0.0563076	E	Shh
GO:0019348	8,9	dolichol metabolic process	2	0.0001	1	0.0024	0.0563076	E	Dpm2
GO:0031987	3,5	locomotion involved in locomotory behavior	2	0.0001	1	0.0024	0.0563076	E	Cln6
GO:0065005	5	protein-lipid complex assembly	2	0.0001	1	0.0024	0.0563076	E	Fech
GO:0046118	11	7-methylguanosine biosynthetic process	2	0.0001	1	0.0024	0.0563076	E	Qtrt1
GO:0018201	9,8	peptidyl-glycine modification	2	0.0001	1	0.0024	0.0563076	E	Nmt1
GO:0007542	5,6,7	primary sex determination, germ-line	2	0.0001	1	0.0024	0.0563076	E	Sox9
GO:0007527	7,8	adult somatic muscle development	2	0.0001	1	0.0024	0.0563076	E	Utrn
GO:0021670	6,4,8,7,9,10,5	lateral ventricle development	2	0.0001	1	0.0024	0.0563076	E	Rpgrip1l
GO:0019100	5,6,7,8	male germ-line sex determination	2	0.0001	1	0.0024	0.0563076	E	Sox9
GO:0048025	10,9,11,12,13,8,7	negative regulation of nuclear mRNA splicing, via spliceosome	2	0.0001	1	0.0024	0.0563076	E	Npm1
GO:0001561	7,8,9	fatty acid alpha-oxidation	2	0.0001	1	0.0024	0.0563076	E	Phyh
GO:0046984	7,6	regulation of hemoglobin biosynthetic process	2	0.0001	1	0.0024	0.0563076	E	Fech
GO:0007538	4,5,6	primary sex determination	2	0.0001	1	0.0024	0.0563076	E	Sox9
GO:0044268	6,5	multicellular organismal protein metabolic process	2	0.0001	1	0.0024	0.0563076	E	P2rx7
GO:0033753	5,6,4	establishment of ribosome localization	2	0.0001	1	0.0024	0.0563076	E	Npm1
GO:0060155	6	platelet dense granule organization	2	0.0001	1	0.0024	0.0563076	E	Dtnbp1
GO:0001845	4,7,6,8	phagolysosome formation	2	0.0001	1	0.0024	0.0563076	E	P2rx7
GO:0046116	11	queuosine metabolic process	2	0.0001	1	0.0024	0.0563076	E	Qtrt1
GO:0006591	7,8	ornithine metabolic process	2	0.0001	1	0.0024	0.0563076	E	Adc
GO:0007619	5,6	courtship behavior	2	0.0001	1	0.0024	0.0563076	E	Trpc2
GO:0051016	11,12,10,9,13,8,7	barbed-end actin filament capping	2	0.0001	1	0.0024	0.0563076	E	Evl
GO:0007042	13,12,6,11	lysosomal lumen acidification	2	0.0001	1	0.0024	0.0563076	E	Cln6
GO:0046087	9	cytidine metabolic process	2	0.0001	1	0.0024	0.0563076	E	Cda
GO:0006702	8,7,6,5	androgen biosynthetic process	2	0.0001	1	0.0024	0.0563076	E	Srd5a1
GO:0015732	7,8	prostaglandin transport	2	0.0001	1	0.0024	0.0563076	E	P2rx7
GO:0018008	10,11,13,12,9	N-terminal peptidyl-glycine N-myristoylation	2	0.0001	1	0.0024	0.0563076	E	Nmt1
GO:0006437	9,11,10,7,8	tyrosyl-tRNA aminoacylation	2	0.0001	1	0.0024	0.0563076	E	Yars
GO:0051957	7,8,6,9,5	positive regulation of amino acid transport	2	0.0001	1	0.0024	0.0563076	E	P2rx7
GO:0015808	7,8,9,10	L-alanine transport	2	0.0001	1	0.0024	0.0563076	E	Slc36a1
GO:0033145	8,9,10,7,6	positive regulation of steroid hormone receptor signaling pathway	2	0.0001	1	0.0024	0.0563076	E	Skp2
GO:0050686	9,8,10,7,6	negative regulation of mRNA processing	2	0.0001	1	0.0024	0.0563076	E	Npm1
GO:0006649	6,7	phospholipid transfer to membrane	2	0.0001	1	0.0024	0.0563076	E	P2rx7
GO:0009082	7,8	branched chain family amino acid biosynthetic process	2	0.0001	1	0.0024	0.0563076	E	Bcat2
GO:0015824	7,8,9	proline transport	2	0.0001	1	0.0024	0.0563076	E	Slc36a1
GO:0018992	4,5,6	germ-line sex determination	2	0.0001	1	0.0024	0.0563076	E	Sox9
GO:0008634	11,10,8,9,6,7	negative regulation of survival gene product expression	2	0.0001	1	0.0024	0.0563076	E	Skp2
GO:0016093	7,8	polyprenol metabolic process	2	0.0001	1	0.0024	0.0563076	E	Dpm2
GO:0002138	8,6	retinoic acid biosynthetic process	2	0.0001	1	0.0024	0.0563076	E	Rdh10
GO:0051602	4	response to electrical stimulus	2	0.0001	1	0.0024	0.0563076	E	P2rx7
GO:0014054	6,8,7,9,5,4,10,11,12	positive regulation of gamma-aminobutyric acid secretion	2	0.0001	1	0.0024	0.0563076	E	P2rx7
GO:0019344	8,9,7	cysteine biosynthetic process	2	0.0001	1	0.0024	0.0563076	E	Cbs
GO:0018377	8,9	protein myristoylation	2	0.0001	1	0.0024	0.0563076	E	Nmt1
GO:0008291	6,8,9,5	acetylcholine metabolic process	2	0.0001	1	0.0024	0.0563076	E	Ache
GO:0007076	5,6,7,8,10,9,4	mitotic chromosome condensation	2	0.0001	1	0.0024	0.0563076	E	Nusap1
GO:0006421	9,11,10,7,8	asparaginyl-tRNA aminoacylation	2	0.0001	1	0.0024	0.0563076	E	Nars2
GO:0006499	9,10,12,11	N-terminal protein myristoylation	2	0.0001	1	0.0024	0.0563076	E	Nmt1
GO:0000055	6,7,10,8,9	ribosomal large subunit export from nucleus	2	0.0001	1	0.0024	0.0563076	E	Npm1
GO:0014052	6,8,7,5,9,10,11	regulation of gamma-aminobutyric acid secretion	2	0.0001	1	0.0024	0.0563076	E	P2rx7
GO:0060738	6,7,8	epithelial-mesenchymal signaling involved in prostate gland development	2	0.0001	1	0.0024	0.0563076	E	Shh
GO:0016090	6,7	prenol metabolic process	2	0.0001	1	0.0024	0.0563076	E	Dpm2
GO:0034377	6	plasma lipoprotein particle assembly	2	0.0001	1	0.0024	0.0563076	E	Fech
GO:0008616	12,11,9,10,8	queuosine biosynthetic process	2	0.0001	1	0.0024	0.0563076	E	Qtrt1
GO:0018319	9,10	protein amino acid myristoylation	2	0.0001	1	0.0024	0.0563076	E	Nmt1
GO:0033750	5	ribosome localization	2	0.0001	1	0.0024	0.0563076	E	Npm1
GO:0034142	12,11,13,10,8	toll-like receptor 4 signaling pathway	2	0.0001	1	0.0024	0.0563076	E	Nfkbia
GO:0033119	9,8,10,7,6	negative regulation of RNA splicing	2	0.0001	1	0.0024	0.0563076	E	Npm1
GO:0000054	5,6,9,7,8	ribosome export from nucleus	2	0.0001	1	0.0024	0.0563076	E	Npm1
GO:0008618	10	7-methylguanosine metabolic process	2	0.0001	1	0.0024	0.0563076	E	Qtrt1
GO:0014048	6,7,5,8	regulation of glutamate secretion	2	0.0001	1	0.0024	0.0563076	E	P2rx7
GO:0048714	11,10,9,12,7,8	positive regulation of oligodendrocyte differentiation	2	0.0001	1	0.0024	0.0563076	E	Shh
GO:0022038	4,6,8,9,10,5	corpus callosum development	2	0.0001	1	0.0024	0.0563076	E	Rpgrip1l
GO:0046653	6,8	tetrahydrofolate metabolic process	2	0.0001	1	0.0024	0.0563076	E	Gch1
GO:0032892	6,7,5,4	positive regulation of organic acid transport	2	0.0001	1	0.0024	0.0563076	E	P2rx7
GO:0035054	7,8,6,5	embryonic heart tube anterior/posterior pattern formation	2	0.0001	1	0.0024	0.0563076	E	Foxh1
GO:0048643	8,9,10,11,6,7	positive regulation of skeletal muscle tissue development	2	0.0001	1	0.0024	0.0563076	E	Shh
GO:0010825	7,10,9,11,8,5,6	positive regulation of centrosome duplication	2	0.0001	1	0.0024	0.0563076	E	Npm1
GO:0046114	10	guanosine biosynthetic process	2	0.0001	1	0.0024	0.0563076	E	Qtrt1
GO:0048496	7,6,5	maintenance of organ identity	2	0.0001	1	0.0024	0.0563076	E	Nphp3
GO:0006429	9,11,10,7,8	leucyl-tRNA aminoacylation	2	0.0001	1	0.0024	0.0563076	E	Lars2
GO:0033148	9,10,11,8,7	positive regulation of estrogen receptor signaling pathway	2	0.0001	1	0.0024	0.0563076	E	Skp2
GO:0007021	7,6	tubulin complex assembly	2	0.0001	1	0.0024	0.0563076	E	Tbce
GO:0050953	7	sensory perception of light stimulus	108	0.0074	6	0.0141	0.056354	E	Cln6,Cnga3,Dtnbp1,Th,Prph2,Rdh10
GO:0007270	6,7	nerve-nerve synaptic transmission	34	0.0023	3	0.0071	0.0584938	E	Stxbp1,Vdac3,Th
GO:0032011	9,8	ARF protein signal transduction	34	0.0023	3	0.0071	0.0584938	E	Cyth1,Fbxo8,Cyth3
GO:0032012	9,10,8	regulation of ARF protein signal transduction	34	0.0023	3	0.0071	0.0584938	E	Cyth1,Fbxo8,Cyth3
GO:0051649	4,3	establishment of localization in cell	626	0.0427	22	0.0518	0.0585821	E	Ap2s1,P2rx7,Syn3,Ap3s2,Ipo4,Ap3m2,Nup188,Nusap1,Nup54,Syngr1,Nfkbia,Stxbp1,Exoc4,Stx4a,Sirt4,Shh,Npm1,Ap4e1,Evl,Ghrh,Nup93,Stam2
GO:0034613	5	cellular protein localization	324	0.0221	13	0.0306	0.059222	E	Ap2s1,Ap3s2,Ipo4,Ap3m2,Nup188,Nup54,Syngr1,Nfkbia,Stx4a,Shh,Ap4e1,Nup93,Stam2
GO:0030500	6,8,7,9,5	regulation of bone mineralization	15	0.001	2	0.0047	0.0601673	E	P2rx7,Sox9
GO:0070167	5,7,8,6,4	regulation of biomineral formation	15	0.001	2	0.0047	0.0601673	E	P2rx7,Sox9
GO:0070727	4	cellular macromolecule localization	326	0.0222	13	0.0306	0.0606115	E	Ap2s1,Ap3s2,Ipo4,Ap3m2,Nup188,Nup54,Syngr1,Nfkbia,Stx4a,Shh,Ap4e1,Nup93,Stam2
GO:0051093	5,3,4	negative regulation of developmental process	392	0.0267	15	0.0353	0.0606422	E	Nrp1,Smurf1,Bag3,Nfkbia,Dad1,Apbb3,Tmbim6,Sox9,Nphp3,Cln3,Shh,Nkx2-2,Skp2,Eef1a2,Tob2
GO:0006865	5,6,7	amino acid transport	58	0.004	4	0.0094	0.0610906	E	P2rx7,Slc7a5,Cln3,Slc36a1
GO:0051188	5	cofactor biosynthetic process	84	0.0057	5	0.0118	0.0617471	E	Coq6,Uros,Fech,Gch1,Acly
GO:0048523	5,3,4	negative regulation of cellular process	1007	0.0687	32	0.0753	0.0643045	E	P2rx7,Ifi30,Foxh1,Capg,Zfpm1,Nrp1,Kcnip3,Bag3,Nfkbia,Snw1,Dad1,Apbb3,Stxbp1,Wdtc1,Sirt4,Tmbim6,Dkk1,Sox9,Nphp3,Cln3,Shh,Nkx2-2,Skp2,Klf11,Npm1,Ddit4,Timeless,Hr,Eef1a2,Tob2,Evl,Purb
GO:0006950	3	response to stress	1086	0.0741	34	0.08	0.0648167	E	P2rx7,Ahsa1,Lsp1,Bccip,Trpc2,Idh1,Mbd4,Dtnbp1,Dclre1c,Kcnip3,Itpr1,Nfkbia,Ddit3,Ccr4,Pxdn,Cbs,Vdac3,Anxa5,Xab2,Hspa8,Fech,Cln3,Shh,F7,Serpinh1,Kin,Smug1,Ccdc47,Npm1,Timeless,Brsk1,Evl,Fancc,Rarres2
GO:0033036	3	macromolecule localization	791	0.054	26	0.0612	0.0660222	E	Ap2s1,P2rx7,Ap3s2,Rab18,Ipo4,Ap3m2,Nup188,Arf2,Rab5b,Nup54,Syngr1,Nfkbia,Katna1,Stxbp1,Atg4a,Gapvd1,Exoc4,Stx4a,Sec24c,Hook2,Shh,Npm1,Rab11a,Ap4e1,Nup93,Stam2
GO:0015931	4,5	nucleobase, nucleoside, nucleotide and nucleic acid transport	60	0.0041	4	0.0094	0.0662237	E	Nup188,Nup54,Npm1,Nup93
GO:0007346	6,5	regulation of mitotic cell cycle	60	0.0041	4	0.0094	0.0662237	E	Nusap1,Sik1,Herc2,Brsk1
GO:0060425	6,7,8,5	lung morphogenesis	16	0.0011	2	0.0047	0.0667764	E	Shh,Rdh10
GO:0019098	4,3	reproductive behavior	16	0.0011	2	0.0047	0.0667764	E	Trpc2,Th
GO:0043392	6	negative regulation of DNA binding	16	0.0011	2	0.0047	0.0667764	E	Nfkbia,Dnaja3
GO:0007618	3,4	mating	16	0.0011	2	0.0047	0.0667764	E	Trpc2,Th
GO:0021782	5,8,6,9	glial cell development	16	0.0011	2	0.0047	0.0667764	E	Shh,Nkx2-2
GO:0010553	11,10,12,9,8	negative regulation of specific transcription from RNA polymerase II promoter	16	0.0011	2	0.0047	0.0667764	E	Wdtc1,Timeless
GO:0006323	3	DNA packaging	115	0.0078	6	0.0141	0.0675341	E	Hist1h2ah,Nusap1,Tssk6,H3f3b,Hist1h4j,H2afy2
GO:0050878	4,3	regulation of body fluid levels	88	0.006	5	0.0118	0.0697058	E	Dtnbp1,Anxa5,Shh,F7,Evl
GO:0006974	4	response to DNA damage stimulus	273	0.0186	11	0.0259	0.0701422	E	Bccip,Trpc2,Mbd4,Dclre1c,Xab2,Kin,Smug1,Npm1,Timeless,Brsk1,Fancc
GO:0010646	5,4	regulation of cell communication	585	0.0399	20	0.0471	0.0701706	E	P2rx7,Ache,Cyth1,Arhgef15,Nfkbia,Cbs,Stxbp1,Gapvd1,Fbxo8,Sirt4,Cyth3,Dkk1,Arhgef1,Cln3,Skp2,Npm1,Ddit4,Rpgrip1l,Vav2,Ghrh
GO:0031324	6,4,5	negative regulation of cellular metabolic process	443	0.0302	16	0.0376	0.0701897	E	Foxh1,Capg,Zfpm1,Kcnip3,Snw1,Wdtc1,Sirt4,Sox9,Cln3,Shh,Klf11,Npm1,Timeless,Hr,Evl,Purb
GO:0022613	3	ribonucleoprotein complex biogenesis	117	0.008	6	0.0141	0.0708043	E	Mrto4,Ipo4,Rrp9,Rrs1,Npm1,Naf1
GO:0010926	2	anatomical structure formation	775	0.0529	25	0.0588	0.0717154	E	P2rx7,Ache,Hist1h2ah,Ipo4,Capg,Nrp1,Tuba1b,Fzd3,Nefh,Fech,Shh,Tbce,Tubb2b,Arpc2,Npm1,Tubb3,Rpgrip1l,Vav2,Rdh10,Evl,Pmp22,H3f3b,Hist1h4j,H2afy2,Actr3b
GO:0034984	5	cellular response to DNA damage stimulus	243	0.0166	10	0.0235	0.0726042	E	Bccip,Trpc2,Mbd4,Dclre1c,Xab2,Kin,Smug1,Npm1,Brsk1,Fancc
GO:0008610	4,5	lipid biosynthetic process	276	0.0188	11	0.0259	0.0726305	E	P2rx7,Srd5a1,Agpat4,Dpm2,Hsd17b7,A4galt,Pigv,Cdipt,Wdtc1,0610007P14Rik,Acly
GO:0051641	3	cellular localization	666	0.0454	22	0.0518	0.0728627	E	Ap2s1,P2rx7,Syn3,Ap3s2,Ipo4,Ap3m2,Nup188,Nusap1,Nup54,Syngr1,Nfkbia,Stxbp1,Exoc4,Stx4a,Sirt4,Shh,Npm1,Ap4e1,Evl,Ghrh,Nup93,Stam2
GO:0006284	8,7	base-excision repair	17	0.0012	2	0.0047	0.0734937	E	Mbd4,Smug1
GO:0060571	8,7,9,6	morphogenesis of an epithelial fold	17	0.0012	2	0.0047	0.0734937	E	Shh,Rdh10
GO:0051100	5	negative regulation of binding	17	0.0012	2	0.0047	0.0734937	E	Nfkbia,Dnaja3
GO:0009308	5	cellular amine metabolic process	279	0.019	11	0.0259	0.0751043	E	Nars2,Ache,Cln6,Gls2,Cbs,Bcat2,Cln3,Th,Yars,Lars2,Adc
GO:0048754	6,5	branching morphogenesis of a tube	91	0.0062	5	0.0118	0.0757943	E	Nrp1,Shh,Timeless,Rdh10,Etv5
GO:0007399	5	nervous system development	797	0.0544	25	0.0588	0.0766909	E	Ctf1,Slc7a5,Sox8,Nrp1,Fzd3,Nrp2,Ccr4,Katna1,Stxbp1,Fscn2,Dkk1,Th,Shh,Nkx2-2,Myt1,Tbce,Metrn,Rpgrip1l,Brsk1,Spnb4,Evl,Pmp22,Ghrh,Dfna5,Cldn11
GO:0051098	4	regulation of binding	64	0.0044	4	0.0094	0.0767558	E	Nfkbia,Dnaja3,Shh,Ikbkb
GO:0010551	10,9,11,8	regulation of specific transcription from RNA polymerase II promoter	39	0.0027	3	0.0071	0.0771666	E	Hmgb2,Wdtc1,Timeless
GO:0032569	10,8,9	specific transcription from RNA polymerase II promoter	39	0.0027	3	0.0071	0.0771666	E	Hmgb2,Wdtc1,Timeless
GO:0051223	7,6,5	regulation of protein transport	39	0.0027	3	0.0071	0.0771666	E	P2rx7,Gapvd1,Shh
GO:0048872	5	homeostasis of number of cells	121	0.0083	6	0.0141	0.0774038	E	P2rx7,Dnaja3,Fech,Ppp3cb,Ikbkb,Fancc
GO:0050793	4,3	regulation of developmental process	888	0.0606	27	0.0635	0.0777089	E	P2rx7,Traf5,Cdc42ep1,Mbd4,Jund,Cd83,Nrp1,Kcnip3,Smurf1,Bag3,Nfkbia,Ddit3,Dad1,Apbb3,Sik1,Tmbim6,Sox9,Nphp3,Cln3,Shh,Nkx2-2,Skp2,Metrn,Ppp3cb,Eef1a2,Tob2,Etv5
GO:0030326	7,6	embryonic limb morphogenesis	92	0.0063	5	0.0118	0.0778395	E	Fto,Dkk1,Shh,Rpgrip1l,Rdh10
GO:0035113	6,5	embryonic appendage morphogenesis	92	0.0063	5	0.0118	0.0778395	E	Fto,Dkk1,Shh,Rpgrip1l,Rdh10
GO:0006519	4	cellular amino acid and derivative metabolic process	249	0.017	10	0.0235	0.0781185	E	Nars2,Ache,Gls2,Cbs,Bcat2,Cln3,Th,Yars,Lars2,Adc
GO:0046907	5,4	intracellular transport	423	0.0289	15	0.0353	0.0784037	E	Ap2s1,Ap3s2,Ipo4,Ap3m2,Nup188,Nup54,Syngr1,Nfkbia,Stx4a,Shh,Npm1,Ap4e1,Evl,Nup93,Stam2
GO:0048468	4,5	cell development	765	0.0522	24	0.0565	0.0784127	E	Ctf1,Jund,Sox8,Nrp1,Nrp2,Chrna1,Ccr4,Katna1,Stxbp1,Tssk6,Fscn2,Sox9,Th,Shh,Nkx2-2,Tbce,Metrn,Ptcd2,Brsk1,Rdh10,Spnb4,Evl,Dfna5,Fancc
GO:0032446	9,8	protein modification by small protein conjugation	65	0.0044	4	0.0094	0.0794298	E	Ube4b,Smurf1,Skp2,Herc2
GO:0006915	5	apoptosis	731	0.0499	23	0.0541	0.0798224	E	P2rx7,Lsp1,Traf5,Ndufa13,Mbd4,Rtkn,Kcnip3,Bag3,Ddit3,Dad1,Apbb3,Bcl7c,Dnaja3,Tmbim6,Sox9,Cln3,Skp2,Klf11,Ddit4,Ppp3cb,E2f2,Eef1a2,Purb
GO:0033014	6	tetrapyrrole biosynthetic process	18	0.0012	2	0.0047	0.0802918	E	Uros,Fech
GO:0032582	10,9,11,8,7	negative regulation of gene-specific transcription	18	0.0012	2	0.0047	0.0802918	E	Wdtc1,Timeless
GO:0048709	8,9,6,7	oligodendrocyte differentiation	18	0.0012	2	0.0047	0.0802918	E	Shh,Nkx2-2
GO:0031329	6,5	regulation of cellular catabolic process	18	0.0012	2	0.0047	0.0802918	E	Cln3,Shh
GO:0002709	8,9,7	regulation of T cell mediated immunity	18	0.0012	2	0.0047	0.0802918	E	P2rx7,Ppp3cb
GO:0006779	6,7	porphyrin biosynthetic process	18	0.0012	2	0.0047	0.0802918	E	Uros,Fech
GO:0001701	6,7	in utero embryonic development	252	0.0172	10	0.0235	0.0808441	E	Sox8,Slc30a1,Nmt1,Dad1,Wdtc1,Xab2,Btf3,Rpgrip1l,Rdh10,N4bp2l2
GO:0042770	7,6	DNA damage response, signal transduction	40	0.0027	3	0.0071	0.0810154	E	Mbd4,Npm1,Brsk1
GO:0006800	4	oxygen and reactive oxygen species metabolic process	40	0.0027	3	0.0071	0.0810154	E	P2rx7,Pxdn,Fancc
GO:0012501	4	programmed cell death	742	0.0506	23	0.0541	0.0819644	E	P2rx7,Lsp1,Traf5,Ndufa13,Mbd4,Rtkn,Kcnip3,Bag3,Ddit3,Dad1,Apbb3,Bcl7c,Dnaja3,Tmbim6,Sox9,Cln3,Skp2,Klf11,Ddit4,Ppp3cb,E2f2,Eef1a2,Purb
GO:0051900	5,11,6,9,4	regulation of mitochondrial depolarization	3	0.0002	1	0.0024	0.0820181	E	P2rx7
GO:0070431	12,11,13,10,8	nucleotide-binding oligomerization domain containing 2 signaling pathway	3	0.0002	1	0.0024	0.0820181	E	Nfkbia
GO:0060180	5,6	female mating behavior	3	0.0002	1	0.0024	0.0820181	E	Trpc2
GO:0060039	4,6,7	pericardium development	3	0.0002	1	0.0024	0.0820181	E	Rpgrip1l
GO:0060684	5	epithelial-mesenchymal cell signaling	3	0.0002	1	0.0024	0.0820181	E	Shh
GO:0048859	4,6,5	formation of anatomical boundary	3	0.0002	1	0.0024	0.0820181	E	Shh
GO:0009207	8,11	purine ribonucleoside triphosphate catabolic process	3	0.0002	1	0.0024	0.0820181	E	Lonp1
GO:0046501	6,7	protoporphyrinogen IX metabolic process	3	0.0002	1	0.0024	0.0820181	E	Fech
GO:0051293	6,5,4	establishment of spindle localization	3	0.0002	1	0.0024	0.0820181	E	Nusap1
GO:0051653	5	spindle localization	3	0.0002	1	0.0024	0.0820181	E	Nusap1
GO:0070423	11,10,12,9,7	nucleotide-binding oligomerization domain containing signaling pathway	3	0.0002	1	0.0024	0.0820181	E	Nfkbia
GO:0030502	7,9,8,10,5,6	negative regulation of bone mineralization	3	0.0002	1	0.0024	0.0820181	E	Sox9
GO:0007252	9,8,10	I-kappaB phosphorylation	3	0.0002	1	0.0024	0.0820181	E	Ikbkb
GO:0045844	7,8,9,10,5,6	positive regulation of striated muscle development	3	0.0002	1	0.0024	0.0820181	E	Shh
GO:0046487	5,7	glyoxylate metabolic process	3	0.0002	1	0.0024	0.0820181	E	Idh1
GO:0045010	7,6	actin nucleation	3	0.0002	1	0.0024	0.0820181	E	Evl
GO:0032890	6,5	regulation of organic acid transport	3	0.0002	1	0.0024	0.0820181	E	P2rx7
GO:0051452	12,11,10	intracellular pH reduction	3	0.0002	1	0.0024	0.0820181	E	Cln6
GO:0031572	9,8	G2/M transition DNA damage checkpoint	3	0.0002	1	0.0024	0.0820181	E	Brsk1
GO:0046952	5	ketone body catabolic process	3	0.0002	1	0.0024	0.0820181	E	Oxct1
GO:0060523	7,9,8,10,11,6	prostate epithelial cord elongation	3	0.0002	1	0.0024	0.0820181	E	Shh
GO:0031576	8,7	G2/M transition checkpoint	3	0.0002	1	0.0024	0.0820181	E	Brsk1
GO:0010998	10,11,9,8,7,6	regulation of translational initiation by eIF2 alpha phosphorylation	3	0.0002	1	0.0024	0.0820181	E	Fech
GO:0032435	8,9,10,12,13,11,6,7	negative regulation of proteasomal ubiquitin-dependent protein catabolic process	3	0.0002	1	0.0024	0.0820181	E	Shh
GO:0070427	12,11,13,10,8	nucleotide-binding oligomerization domain containing 1 signaling pathway	3	0.0002	1	0.0024	0.0820181	E	Nfkbia
GO:0010999	11,9,10,6,12,7,8,5	regulation of eIF2 alpha phosphorylation by heme	3	0.0002	1	0.0024	0.0820181	E	Fech
GO:0045746	8,9,7,6	negative regulation of Notch signaling pathway	3	0.0002	1	0.0024	0.0820181	E	Nfkbia
GO:0032288	5,14,10,6,12,7,9	myelin assembly	3	0.0002	1	0.0024	0.0820181	E	Pmp22
GO:0046131	8	pyrimidine ribonucleoside metabolic process	3	0.0002	1	0.0024	0.0820181	E	Cda
GO:0001915	7,8,10,11,12,9,5,6	negative regulation of T cell mediated cytotoxicity	3	0.0002	1	0.0024	0.0820181	E	Ppp3cb
GO:0070168	6,7,8,9,4,5	negative regulation of biomineral formation	3	0.0002	1	0.0024	0.0820181	E	Sox9
GO:0050882	5	voluntary musculoskeletal movement	3	0.0002	1	0.0024	0.0820181	E	Itpr1
GO:0009452	8,7,6	RNA capping	3	0.0002	1	0.0024	0.0820181	E	Rngtt
GO:0001919	7,8,6	regulation of receptor recycling	3	0.0002	1	0.0024	0.0820181	E	Ache
GO:0007412	7,9,8,4,12,10,13,11	axon target recognition	3	0.0002	1	0.0024	0.0820181	E	Stxbp1
GO:0030908	8,7	protein splicing	3	0.0002	1	0.0024	0.0820181	E	Shh
GO:0045922	7,8,6,5,9	negative regulation of fatty acid metabolic process	3	0.0002	1	0.0024	0.0820181	E	Wdtc1
GO:0045110	4,7,6	intermediate filament bundle assembly	3	0.0002	1	0.0024	0.0820181	E	Nefh
GO:0008617	9	guanosine metabolic process	3	0.0002	1	0.0024	0.0820181	E	Qtrt1
GO:0032743	7,5,6	positive regulation of interleukin-2 production	3	0.0002	1	0.0024	0.0820181	E	Cd83
GO:0021530	11,10,12,7,9,8	spinal cord oligodendrocyte cell fate specification	3	0.0002	1	0.0024	0.0820181	E	Nkx2-2
GO:0048636	6,7,8,4,5	positive regulation of muscle development	3	0.0002	1	0.0024	0.0820181	E	Shh
GO:0032328	7,8,9	alanine transport	3	0.0002	1	0.0024	0.0820181	E	Slc36a1
GO:0007525	6,7	somatic muscle development	3	0.0002	1	0.0024	0.0820181	E	Utrn
GO:0050717	9,10,12,11,7,8	positive regulation of interleukin-1 alpha secretion	3	0.0002	1	0.0024	0.0820181	E	P2rx7
GO:0050705	9,11,10,8,7	regulation of interleukin-1 alpha secretion	3	0.0002	1	0.0024	0.0820181	E	P2rx7
GO:0007095	10,9	mitotic cell cycle G2/M transition DNA damage checkpoint	3	0.0002	1	0.0024	0.0820181	E	Brsk1
GO:0021529	9,10,6,7,8	spinal cord oligodendrocyte cell differentiation	3	0.0002	1	0.0024	0.0820181	E	Nkx2-2
GO:0043516	7,6,9,8,5	regulation of DNA damage response, signal transduction by p53 class mediator	3	0.0002	1	0.0024	0.0820181	E	Npm1
GO:0051955	7,6,8	regulation of amino acid transport	3	0.0002	1	0.0024	0.0820181	E	P2rx7
GO:0016539	9,8	intein-mediated protein splicing	3	0.0002	1	0.0024	0.0820181	E	Shh
GO:0006200	9,12	ATP catabolic process	3	0.0002	1	0.0024	0.0820181	E	Lonp1
GO:0050703	9,7,8,10,6	interleukin-1 alpha secretion	3	0.0002	1	0.0024	0.0820181	E	P2rx7
GO:0045717	8,9,6,7,10	negative regulation of fatty acid biosynthetic process	3	0.0002	1	0.0024	0.0820181	E	Wdtc1
GO:0016242	7,9,8,5,6,10	negative regulation of macroautophagy	3	0.0002	1	0.0024	0.0820181	E	Cln3
GO:0010043	6	response to zinc ion	3	0.0002	1	0.0024	0.0820181	E	P2rx7
GO:0051882	10,8	mitochondrial depolarization	3	0.0002	1	0.0024	0.0820181	E	P2rx7
GO:0046950	4	cellular ketone body metabolic process	3	0.0002	1	0.0024	0.0820181	E	Oxct1
GO:0008033	9,8,7	tRNA processing	66	0.0045	4	0.0094	0.0821151	E	Gtpbp3,Nsun2,Tsen54,Qtrt1
GO:0008202	5,6	steroid metabolic process	155	0.0106	7	0.0165	0.0822944	E	Srd5a1,Cln6,Hsd17b7,Fech,Shh,0610007P14Rik,Apob48r
GO:0001654	6,7	eye development	157	0.0107	7	0.0165	0.0850581	E	Ache,Fscn2,Th,Shh,Rpgrip1l,Prph2,Rdh10
GO:0009790	3,4	embryonic development	676	0.0461	21	0.0494	0.0856882	E	Foxh1,Sox8,Nrp1,Slc30a1,Fzd3,Nmt1,Dad1,Fto,Wdtc1,Xab2,Abi1,Dnaja3,Dkk1,Th,Shh,Ccdc47,Btf3,Rpgrip1l,Timeless,Rdh10,N4bp2l2
GO:0043010	7,8	camera-type eye development	126	0.0086	6	0.0141	0.0856965	E	Ache,Th,Shh,Rpgrip1l,Prph2,Rdh10
GO:0008219	3	cell death	773	0.0527	23	0.0541	0.0857973	E	P2rx7,Lsp1,Traf5,Ndufa13,Mbd4,Rtkn,Kcnip3,Bag3,Ddit3,Dad1,Apbb3,Bcl7c,Dnaja3,Tmbim6,Sox9,Cln3,Skp2,Klf11,Ddit4,Ppp3cb,E2f2,Eef1a2,Purb
GO:0016265	2	death	782	0.0533	23	0.0541	0.0862799	E	P2rx7,Lsp1,Traf5,Ndufa13,Mbd4,Rtkn,Kcnip3,Bag3,Ddit3,Dad1,Apbb3,Bcl7c,Dnaja3,Tmbim6,Sox9,Cln3,Skp2,Klf11,Ddit4,Ppp3cb,E2f2,Eef1a2,Purb
GO:0006811	4,5	ion transport	682	0.0465	21	0.0494	0.0867589	E	P2rx7,Wnk1,Slc34a1,Mfi2,Trpc2,Cnga3,Slc30a1,Kcnh6,Kcnip3,Pllp,Itpr1,Chrna1,Slc22a18,Atp5c1,Vdac3,Clca6,Atp5j2,Cnnm3,Sfxn2,Slc36a1,Slc4a8
GO:0035115	8,7	embryonic forelimb morphogenesis	19	0.0013	2	0.0047	0.0871453	E	Rpgrip1l,Rdh10
GO:0009895	6,4,5	negative regulation of catabolic process	19	0.0013	2	0.0047	0.0871453	E	Cln3,Shh
GO:0051222	6,8,7,5,4	positive regulation of protein transport	19	0.0013	2	0.0047	0.0871453	E	P2rx7,Shh
GO:0045104	5,4	intermediate filament cytoskeleton organization	19	0.0013	2	0.0047	0.0871453	E	Nefh,Shh
GO:0042168	6,7,4	heme metabolic process	19	0.0013	2	0.0047	0.0871453	E	Uros,Fech
GO:0048665	9,10,7,6,5	neuron fate specification	19	0.0013	2	0.0047	0.0871453	E	Shh,Nkx2-2
GO:0019752	5	carboxylic acid metabolic process	441	0.0301	15	0.0353	0.0874434	E	Nars2,Idh1,Gls2,Phyh,Cbs,Bcat2,Wdtc1,Car5a,Acsf3,Cln3,Th,Yars,Gch1,Lars2,Adc
GO:0009309	6	amine biosynthetic process	68	0.0046	4	0.0094	0.0875101	E	Cbs,Bcat2,Th,Adc
GO:0006082	4	organic acid metabolic process	442	0.0302	15	0.0353	0.087905	E	Nars2,Idh1,Gls2,Phyh,Cbs,Bcat2,Wdtc1,Car5a,Acsf3,Cln3,Th,Yars,Gch1,Lars2,Adc
GO:0007269	5,6,7,8,4	neurotransmitter secretion	42	0.0029	3	0.0071	0.0887788	E	P2rx7,Syn3,Stx4a
GO:0045934	7,5,6	negative regulation of nucleobase, nucleoside, nucleotide and nucleic acid metabolic process	333	0.0227	12	0.0282	0.0893299	E	Foxh1,Zfpm1,Kcnip3,Snw1,Wdtc1,Sirt4,Sox9,Klf11,Npm1,Timeless,Hr,Purb
GO:0042060	5	wound healing	98	0.0067	5	0.0118	0.0901838	E	Dtnbp1,Anxa5,Shh,F7,Evl
GO:0034641	4	cellular nitrogen compound metabolic process	299	0.0204	11	0.0259	0.0908581	E	Nars2,Ache,Cln6,Gls2,Cbs,Bcat2,Cln3,Th,Yars,Lars2,Adc
GO:0045596	6,5,4	negative regulation of cell differentiation	162	0.0111	7	0.0165	0.0919069	E	Nrp1,Nfkbia,Sox9,Nphp3,Shh,Nkx2-2,Tob2
GO:0001503	5,7,3	ossification	130	0.0089	6	0.0141	0.0923021	E	P2rx7,Jund,Smurf1,Sox9,Shh,Tob2
GO:0001763	5,4	morphogenesis of a branching structure	130	0.0089	6	0.0141	0.0923021	E	Nrp1,Sox9,Shh,Timeless,Rdh10,Etv5
GO:0043039	7,9,8	tRNA aminoacylation	43	0.0029	3	0.0071	0.0926819	E	Nars2,Yars,Lars2
GO:0051325	6,5	interphase	43	0.0029	3	0.0071	0.0926819	E	Cdc123,Skp2,Brsk1
GO:0006418	8,10,9,6,7	tRNA aminoacylation for protein translation	43	0.0029	3	0.0071	0.0926819	E	Nars2,Yars,Lars2
GO:0051329	7,5,6	interphase of mitotic cell cycle	43	0.0029	3	0.0071	0.0926819	E	Cdc123,Skp2,Brsk1
GO:0043038	6,7	amino acid activation	43	0.0029	3	0.0071	0.0926819	E	Nars2,Yars,Lars2
GO:0016458	8,3,6,7	gene silencing	43	0.0029	3	0.0071	0.0926819	E	Eif2c2,Sirt4,Tnrc6b
GO:0044087	4,3	regulation of cellular component biogenesis	70	0.0048	4	0.0094	0.0929217	E	Capg,Arpc2,Evl,Actr3b
GO:0051253	8,7,6,5	negative regulation of RNA metabolic process	266	0.0181	10	0.0235	0.0930786	E	Foxh1,Zfpm1,Kcnip3,Wdtc1,Sirt4,Sox9,Klf11,Npm1,Timeless,Purb
GO:0031325	6,4,5	positive regulation of cellular metabolic process	537	0.0366	17	0.04	0.0932563	E	P2rx7,Hmgb2,Cln6,Foxh1,Sox8,Gtf2f1,Snw1,Npas4,Sox9,Ablim2,Shh,Nkx2-2,Arpc2,Tef,Npm1,Etv5,Ghrh
GO:0007265	8,7	Ras protein signal transduction	197	0.0134	8	0.0188	0.0938266	E	Cyth1,Arhgef15,Cdc42ep1,Fbxo8,Cyth3,Arhgef1,Vav2,Rsu1
GO:0045638	7,6,5,8,9,10	negative regulation of myeloid cell differentiation	20	0.0014	2	0.0047	0.0940304	E	Nfkbia,Tob2
GO:0051693	10,11,9,8,12,7,6	actin filament capping	20	0.0014	2	0.0047	0.0940304	E	Capg,Evl
GO:0032200	5	telomere organization	20	0.0014	2	0.0047	0.0940304	E	Dclre1c,Xrn1
GO:0000723	6,7	telomere maintenance	20	0.0014	2	0.0047	0.0940304	E	Dclre1c,Xrn1
GO:0006366	9,7,8	transcription from RNA polymerase II promoter	586	0.04	18	0.0424	0.0941164	E	Med24,Hmgb2,Phrf1,Foxh1,Zfpm1,Sox8,Kcnip3,Tcea2,Ddit3,Snw1,Npas4,Wdtc1,Sox9,Ablim2,Shh,Nkx2-2,Tef,Timeless
GO:0048699	6,7	generation of neurons	458	0.0312	15	0.0353	0.0946015	E	Ctf1,Nrp1,Ccr4,Katna1,Stxbp1,Fscn2,Th,Shh,Nkx2-2,Tbce,Metrn,Brsk1,Spnb4,Evl,Dfna5
GO:0009966	6,5	regulation of signal transduction	501	0.0342	16	0.0376	0.0951292	E	P2rx7,Ache,Cyth1,Arhgef15,Nfkbia,Cbs,Gapvd1,Fbxo8,Cyth3,Dkk1,Arhgef1,Skp2,Npm1,Ddit4,Rpgrip1l,Vav2
GO:0046942	5,6	carboxylic acid transport	71	0.0048	4	0.0094	0.0956277	E	P2rx7,Slc7a5,Cln3,Slc36a1
GO:0008203	6,7,8	cholesterol metabolic process	71	0.0048	4	0.0094	0.0956277	E	Cln6,Hsd17b7,Fech,Apob48r
GO:0030031	4	cell projection assembly	71	0.0048	4	0.0094	0.0956277	E	P2rx7,Capg,Rpgrip1l,Vav2
GO:0051276	4	chromosome organization	382	0.0261	13	0.0306	0.0960363	E	Suv420h2,L3mbtl2,Hist1h2ah,Dclre1c,Xrn1,Nusap1,Smyd3,Tssk6,Smarcal1,H3f3b,Hist1h4j,H2afy2,Arid1a
GO:0070201	6,4,5	regulation of establishment of protein localization	44	0.003	3	0.0071	0.0965918	E	P2rx7,Gapvd1,Shh
GO:0051259	6,5	protein oligomerization	44	0.003	3	0.0071	0.0965918	E	P2rx7,Ache,Npm1
GO:0034470	8,7,6	ncRNA processing	133	0.0091	6	0.0141	0.0972065	E	Rrp9,Gtpbp3,Nsun2,Tsen54,Qtrt1,Naf1
GO:0051186	4	cofactor metabolic process	166	0.0113	7	0.0165	0.0972888	E	Coq6,Idh1,Rpia,Uros,Fech,Gch1,Acly
GO:0009893	5,3,4	positive regulation of metabolic process	560	0.0382	17	0.04	0.0979158	E	P2rx7,Hmgb2,Cln6,Foxh1,Sox8,Gtf2f1,Snw1,Npas4,Sox9,Ablim2,Shh,Nkx2-2,Arpc2,Tef,Npm1,Etv5,Ghrh
GO:0015849	4,5	organic acid transport	72	0.0049	4	0.0094	0.0983307	E	P2rx7,Slc7a5,Cln3,Slc36a1
GO:0044255	4,5	cellular lipid metabolic process	564	0.0385	17	0.04	0.0984342	E	P2rx7,Srd5a1,Agpat4,Cln6,Dpm2,Hsd17b7,Enpp7,Phyh,Pigv,Cdipt,Pip5kl1,Wdtc1,Acsf3,Fech,Shh,0610007P14Rik,Apob48r
GO:0016481	8,9,6,7	negative regulation of transcription	312	0.0213	11	0.0259	0.0999668	E	Foxh1,Zfpm1,Kcnip3,Snw1,Wdtc1,Sirt4,Sox9,Klf11,Timeless,Hr,Purb
GO:0030098	6,8,9,7,5	lymphocyte differentiation	135	0.0092	6	0.0141	0.100441	E	Dclre1c,Cd83,Dnaja3,Shh,Ppp3cb,Il11ra1
GO:0001508	9,7	regulation of action potential	45	0.0031	3	0.0071	0.100503	E	Cln3,Pmp22,Cldn11
GO:0032963	5	collagen metabolic process	21	0.0014	2	0.0047	0.100925	E	P2rx7,Serpinh1
GO:0006984	7,6	ER-nuclear signaling pathway	21	0.0014	2	0.0047	0.100925	E	Ddit3,Ccdc47
GO:0030835	8,7,9,11,10,6,5	negative regulation of actin filament depolymerization	21	0.0014	2	0.0047	0.100925	E	Capg,Evl
GO:0034976	5	response to endoplasmic reticulum stress	21	0.0014	2	0.0047	0.100925	E	Ddit3,Ccdc47
GO:0042462	10,7,11,8,9	eye photoreceptor cell development	21	0.0014	2	0.0047	0.100925	E	Fscn2,Th
GO:0006807	3	nitrogen compound metabolic process	317	0.0216	11	0.0259	0.103146	E	Nars2,Ache,Cln6,Gls2,Cbs,Bcat2,Cln3,Th,Yars,Lars2,Adc
GO:0022008	5,6	neurogenesis	489	0.0334	15	0.0353	0.103312	E	Ctf1,Nrp1,Ccr4,Katna1,Stxbp1,Fscn2,Th,Shh,Nkx2-2,Tbce,Metrn,Brsk1,Spnb4,Evl,Dfna5
GO:0009890	6,4,5	negative regulation of biosynthetic process	357	0.0244	12	0.0282	0.103384	E	Foxh1,Zfpm1,Kcnip3,Snw1,Wdtc1,Sirt4,Sox9,Klf11,Timeless,Hr,Gchfr,Purb
GO:0007224	7,6	smoothened signaling pathway	46	0.0031	3	0.0071	0.10441	E	Shh,Nkx2-2,Rpgrip1l
GO:0001822	5,6	kidney development	105	0.0072	5	0.0118	0.10447	E	Shh,Rpgrip1l,Timeless,Ptcd2,Rdh10
GO:0006820	5,6	anion transport	105	0.0072	5	0.0118	0.10447	E	Slc34a1,Slc22a18,Vdac3,Clca6,Slc4a8
GO:0060348	4,6	bone development	138	0.0094	6	0.0141	0.105225	E	P2rx7,Jund,Smurf1,Sox9,Shh,Tob2
GO:0009203	7,10	ribonucleoside triphosphate catabolic process	4	0.0003	1	0.0024	0.106194	E	Lonp1
GO:0050702	9,7,8,10,6	interleukin-1 beta secretion	4	0.0003	1	0.0024	0.106194	E	P2rx7
GO:0050716	8,9,11,10,6,7	positive regulation of interleukin-1 secretion	4	0.0003	1	0.0024	0.106194	E	P2rx7
GO:0030501	7,9,8,10,5,6	positive regulation of bone mineralization	4	0.0003	1	0.0024	0.106194	E	P2rx7
GO:0051055	7,8,5,6	negative regulation of lipid biosynthetic process	4	0.0003	1	0.0024	0.106194	E	Wdtc1
GO:0045779	6,8,9,7,4,5	negative regulation of bone resorption	4	0.0003	1	0.0024	0.106194	E	P2rx7
GO:0042455	8	ribonucleoside biosynthetic process	4	0.0003	1	0.0024	0.106194	E	Qtrt1
GO:0006422	9,11,10,7,8	aspartyl-tRNA aminoacylation	4	0.0003	1	0.0024	0.106194	E	Nars2
GO:0010507	8,6,7	negative regulation of autophagy	4	0.0003	1	0.0024	0.106194	E	Cln3
GO:0009163	7	nucleoside biosynthetic process	4	0.0003	1	0.0024	0.106194	E	Qtrt1
GO:0006509	9,8	membrane protein ectodomain proteolysis	4	0.0003	1	0.0024	0.106194	E	P2rx7
GO:0048841	9,10,12,6,11,8,5,14,13,15,7	regulation of axon extension involved in axon guidance	4	0.0003	1	0.0024	0.106194	E	Nrp1
GO:0033619	8,7	membrane protein proteolysis	4	0.0003	1	0.0024	0.106194	E	P2rx7
GO:0046129	9	purine ribonucleoside biosynthetic process	4	0.0003	1	0.0024	0.106194	E	Qtrt1
GO:0006498	8,11,9,10	N-terminal protein lipidation	4	0.0003	1	0.0024	0.106194	E	Nmt1
GO:0032495	7,6,8	response to muramyl dipeptide	4	0.0003	1	0.0024	0.106194	E	Nfkbia
GO:0007213	8,7	muscarinic acetylcholine receptor signaling pathway	4	0.0003	1	0.0024	0.106194	E	Gnai2
GO:0031623	7,5,6,8	receptor internalization	4	0.0003	1	0.0024	0.106194	E	Ache
GO:0060124	7,8,9,10,6,5,11	positive regulation of growth hormone secretion	4	0.0003	1	0.0024	0.106194	E	Ghrh
GO:0060459	6,7,8	left lung development	4	0.0003	1	0.0024	0.106194	E	Shh
GO:0030641	10,8	regulation of cellular pH	4	0.0003	1	0.0024	0.106194	E	Cln6
GO:0007216	8,7	metabotropic glutamate receptor signaling pathway	4	0.0003	1	0.0024	0.106194	E	Homer3
GO:0021978	6,8,9,10,5,7	telencephalon regionalization	4	0.0003	1	0.0024	0.106194	E	Shh
GO:0051453	11,9	regulation of intracellular pH	4	0.0003	1	0.0024	0.106194	E	Cln6
GO:0000281	6,5	cytokinesis after mitosis	4	0.0003	1	0.0024	0.106194	E	Nusap1
GO:0048846	8,10,9,5,13,11,14,12,6	axon extension involved in axon guidance	4	0.0003	1	0.0024	0.106194	E	Nrp1
GO:0015816	7,8,9	glycine transport	4	0.0003	1	0.0024	0.106194	E	Slc36a1
GO:0021591	6,7,8,5	ventricular system development	4	0.0003	1	0.0024	0.106194	E	Rpgrip1l
GO:0016241	6,8,7,5,9	regulation of macroautophagy	4	0.0003	1	0.0024	0.106194	E	Cln3
GO:0050704	8,10,9,7,6	regulation of interleukin-1 secretion	4	0.0003	1	0.0024	0.106194	E	P2rx7
GO:0021779	9,10,7,6,8	oligodendrocyte cell fate commitment	4	0.0003	1	0.0024	0.106194	E	Nkx2-2
GO:0034204	5,6	lipid translocation	4	0.0003	1	0.0024	0.106194	E	P2rx7
GO:0006900	4,5,6	membrane budding	4	0.0003	1	0.0024	0.106194	E	P2rx7
GO:0042451	8	purine nucleoside biosynthetic process	4	0.0003	1	0.0024	0.106194	E	Qtrt1
GO:0033363	5	secretory granule organization	4	0.0003	1	0.0024	0.106194	E	Dtnbp1
GO:0048935	9,6,10,7,8	peripheral nervous system neuron development	4	0.0003	1	0.0024	0.106194	E	Tbce
GO:0021778	10,11,8,7,6,9	oligodendrocyte cell fate specification	4	0.0003	1	0.0024	0.106194	E	Nkx2-2
GO:0035235	8,7	ionotropic glutamate receptor signaling pathway	4	0.0003	1	0.0024	0.106194	E	Cln3
GO:0007289	5,7,8,9,6	spermatid nucleus differentiation	4	0.0003	1	0.0024	0.106194	E	Tssk6
GO:0045332	4,6,7	phospholipid translocation	4	0.0003	1	0.0024	0.106194	E	P2rx7
GO:0042273	4,5	ribosomal large subunit biogenesis	4	0.0003	1	0.0024	0.106194	E	Npm1
GO:0050919	5,7,6	negative chemotaxis	4	0.0003	1	0.0024	0.106194	E	Nrp2
GO:0021780	9,10,7,6,5	glial cell fate specification	4	0.0003	1	0.0024	0.106194	E	Nkx2-2
GO:0050706	9,11,10,8,7	regulation of interleukin-1 beta secretion	4	0.0003	1	0.0024	0.106194	E	P2rx7
GO:0006610	9,10,8,7	ribosomal protein import into nucleus	4	0.0003	1	0.0024	0.106194	E	Ipo4
GO:0032713	7,5,6	negative regulation of interleukin-4 production	4	0.0003	1	0.0024	0.106194	E	Cd83
GO:0048024	9,8,10,12,11,7	regulation of nuclear mRNA splicing, via spliceosome	4	0.0003	1	0.0024	0.106194	E	Npm1
GO:0015904	6,7	tetracycline transport	4	0.0003	1	0.0024	0.106194	E	Slc22a18
GO:0021938	9,8,6,7,10,11,12,13,14,15	smoothened signaling pathway involved in regulation of granule cell precursor cell proliferation	4	0.0003	1	0.0024	0.106194	E	Shh
GO:0042274	4,5	ribosomal small subunit biogenesis	4	0.0003	1	0.0024	0.106194	E	Npm1
GO:0000012	8,7	single strand break repair	4	0.0003	1	0.0024	0.106194	E	Trpc2
GO:0010824	9,8,10,7,6	regulation of centrosome duplication	4	0.0003	1	0.0024	0.106194	E	Npm1
GO:0070169	6,7,8,9,4,5	positive regulation of biomineral formation	4	0.0003	1	0.0024	0.106194	E	P2rx7
GO:0048318	7,8,6	axial mesoderm development	4	0.0003	1	0.0024	0.106194	E	Foxh1
GO:0043500	5	muscle adaptation	4	0.0003	1	0.0024	0.106194	E	Tbce
GO:0051155	8,7,6,10,9,11	positive regulation of striated muscle cell differentiation	4	0.0003	1	0.0024	0.106194	E	Shh
GO:0050718	9,10,12,11,7,8	positive regulation of interleukin-1 beta secretion	4	0.0003	1	0.0024	0.106194	E	P2rx7
GO:0048843	9,11,10,13,7,12,8,6,14,15,16	negative regulation of axon extension involved in axon guidance	4	0.0003	1	0.0024	0.106194	E	Nrp1
GO:0006066	4	cellular alcohol metabolic process	283	0.0193	10	0.0235	0.10624	E	Cln6,Hsd17b7,Rpia,Aldoc,Wdtc1,Car5a,Fech,Th,0610007P14Rik,Apob48r
GO:0006916	9,8,7,6	anti-apoptosis	75	0.0051	4	0.0094	0.1064	E	Bag3,Dad1,Skp2,Eef1a2
GO:0001655	5	urogenital system development	139	0.0095	6	0.0141	0.106799	E	Sox9,Shh,Rpgrip1l,Timeless,Ptcd2,Rdh10
GO:0044259	4	multicellular organismal macromolecule metabolic process	22	0.0015	2	0.0047	0.10781	E	P2rx7,Serpinh1
GO:0031047	9,4,7,8	gene silencing by RNA	22	0.0015	2	0.0047	0.10781	E	Eif2c2,Tnrc6b
GO:0046637	10,8,9,7,11,12,6	regulation of alpha-beta T cell differentiation	22	0.0015	2	0.0047	0.10781	E	Cd83,Shh
GO:0045103	3	intermediate filament-based process	22	0.0015	2	0.0047	0.10781	E	Nefh,Shh
GO:0010001	7,8,5	glial cell differentiation	47	0.0032	3	0.0071	0.108308	E	Shh,Nkx2-2,Metrn
GO:0040029	7,6	regulation of gene expression, epigenetic	47	0.0032	3	0.0071	0.108308	E	Mbd4,Sirt4,H2afy2
GO:0046546	5,6,7	development of primary male sexual characteristics	47	0.0032	3	0.0071	0.108308	E	Hmgb2,Sox9,Shh
GO:0031328	7,5,6	positive regulation of cellular biosynthetic process	466	0.0318	14	0.0329	0.108416	E	Hmgb2,Foxh1,Sox8,Gtf2f1,Snw1,Npas4,Sox9,Ablim2,Shh,Nkx2-2,Tef,Npm1,Etv5,Ghrh
GO:0009891	6,4,5	positive regulation of biosynthetic process	468	0.0319	14	0.0329	0.108637	E	Hmgb2,Foxh1,Sox8,Gtf2f1,Snw1,Npas4,Sox9,Ablim2,Shh,Nkx2-2,Tef,Npm1,Etv5,Ghrh
GO:0030182	7,8,5	neuron differentiation	414	0.0282	13	0.0306	0.108698	E	Ctf1,Nrp1,Stxbp1,Fscn2,Th,Shh,Nkx2-2,Tbce,Metrn,Brsk1,Spnb4,Evl,Dfna5
GO:0042981	7,6	regulation of apoptosis	475	0.0324	14	0.0329	0.109182	E	P2rx7,Traf5,Mbd4,Kcnip3,Bag3,Ddit3,Dad1,Apbb3,Tmbim6,Sox9,Cln3,Skp2,Ppp3cb,Eef1a2
GO:0043067	6,5	regulation of programmed cell death	482	0.0329	14	0.0329	0.109375	E	P2rx7,Traf5,Mbd4,Kcnip3,Bag3,Ddit3,Dad1,Apbb3,Tmbim6,Sox9,Cln3,Skp2,Ppp3cb,Eef1a2
GO:0043009	5,6	chordate embryonic development	418	0.0285	13	0.0306	0.109728	E	Sox8,Slc30a1,Fzd3,Nmt1,Dad1,Wdtc1,Xab2,Abi1,Shh,Btf3,Rpgrip1l,Rdh10,N4bp2l2
GO:0030097	6,7,5	hemopoiesis	289	0.0197	10	0.0235	0.110287	E	Dclre1c,Cd83,Nfkbia,Dnaja3,Fech,Shh,Klf11,Ppp3cb,Tob2,Il11ra1
GO:0009792	4,5	embryonic development ending in birth or egg hatching	421	0.0287	13	0.0306	0.110416	E	Sox8,Slc30a1,Fzd3,Nmt1,Dad1,Wdtc1,Xab2,Abi1,Shh,Btf3,Rpgrip1l,Rdh10,N4bp2l2
GO:0006281	7,6	DNA repair	213	0.0145	8	0.0188	0.110911	E	Bccip,Trpc2,Mbd4,Dclre1c,Xab2,Kin,Smug1,Fancc
GO:0030030	3	cell projection organization	331	0.0226	11	0.0259	0.110915	E	P2rx7,Capg,Nrp1,Stxbp1,Shh,Tbce,Metrn,Rpgrip1l,Vav2,Spnb4,Evl
GO:0045935	7,5,6	positive regulation of nucleobase, nucleoside, nucleotide and nucleic acid metabolic process	424	0.0289	13	0.0306	0.11103	E	Hmgb2,Foxh1,Sox8,Gtf2f1,Snw1,Npas4,Sox9,Ablim2,Shh,Nkx2-2,Tef,Etv5,Ghrh
GO:0070647	8,7	protein modification by small protein conjugation or removal	77	0.0053	4	0.0094	0.111724	E	Ube4b,Smurf1,Skp2,Herc2
GO:0032989	3,4,5	cellular component morphogenesis	377	0.0257	12	0.0282	0.111737	E	P2rx7,Cdc42ep1,Nrp1,Stxbp1,Sox9,Shh,Tbce,Metrn,Brsk1,Spnb4,Evl,Pmp22
GO:0045595	5,4	regulation of cell differentiation	335	0.0229	11	0.0259	0.112801	E	Jund,Cd83,Nrp1,Nfkbia,Sik1,Sox9,Nphp3,Shh,Nkx2-2,Metrn,Tob2
GO:0002521	5,7,8,6	leukocyte differentiation	179	0.0122	7	0.0165	0.113782	E	Dclre1c,Cd83,Dnaja3,Shh,Ppp3cb,Tob2,Il11ra1
GO:0007423	5,6	sensory organ development	255	0.0174	9	0.0212	0.114197	E	Ache,Fzd3,Fscn2,Th,Shh,Rpgrip1l,Prph2,Rdh10,Dfna5
GO:0008654	5,6,7	phospholipid biosynthetic process	78	0.0053	4	0.0094	0.114363	E	Agpat4,Dpm2,Pigv,Cdipt
GO:0006644	5,6	phospholipid metabolic process	144	0.0098	6	0.0141	0.11448	E	Agpat4,Dpm2,Enpp7,Pigv,Cdipt,Pip5kl1
GO:0051091	9,7,10,8	positive regulation of transcription factor activity	23	0.0016	2	0.0047	0.114665	E	Shh,Ikbkb
GO:0002456	6,7	T cell mediated immunity	23	0.0016	2	0.0047	0.114665	E	P2rx7,Ppp3cb
GO:0060688	6,5,4	regulation of morphogenesis of a branching structure	23	0.0016	2	0.0047	0.114665	E	Shh,Etv5
GO:0001569	5,7,8,9,10,6	patterning of blood vessels	23	0.0016	2	0.0047	0.114665	E	Nrp1,Shh
GO:0001754	9,10,7,8,6	eye photoreceptor cell differentiation	23	0.0016	2	0.0047	0.114665	E	Fscn2,Th
GO:0001755	6,7,8,10,11,9,5	neural crest cell migration	23	0.0016	2	0.0047	0.114665	E	Nrp2,Shh
GO:0006497	7,8	protein amino acid lipidation	49	0.0033	3	0.0071	0.116057	E	Dpm2,Nmt1,Pigv
GO:0032583	9,8,10,7	regulation of gene-specific transcription	49	0.0033	3	0.0071	0.116057	E	Hmgb2,Wdtc1,Timeless
GO:0003001	5,3	generation of a signal involved in cell-cell signaling	111	0.0076	5	0.0118	0.116317	E	P2rx7,Syn3,Stx4a,Sirt4,Ghrh
GO:0010558	7,5,6	negative regulation of macromolecule biosynthetic process	345	0.0235	11	0.0259	0.116823	E	Foxh1,Zfpm1,Kcnip3,Snw1,Wdtc1,Sirt4,Sox9,Klf11,Timeless,Hr,Purb
GO:0051130	5,3,4	positive regulation of cellular component organization	79	0.0054	4	0.0094	0.116984	E	Nusap1,Arpc2,Metrn,Npm1
GO:0000902	4,5,6	cell morphogenesis	346	0.0236	11	0.0259	0.11717	E	P2rx7,Cdc42ep1,Nrp1,Stxbp1,Sox9,Shh,Tbce,Metrn,Brsk1,Spnb4,Evl
GO:0045941	8,9,6,7	positive regulation of transcription	404	0.0276	12	0.0282	0.117343	E	Hmgb2,Foxh1,Sox8,Gtf2f1,Snw1,Npas4,Sox9,Ablim2,Shh,Nkx2-2,Tef,Etv5
GO:0010628	7,5,6	positive regulation of gene expression	413	0.0282	12	0.0282	0.117736	E	Hmgb2,Foxh1,Sox8,Gtf2f1,Snw1,Npas4,Sox9,Ablim2,Shh,Nkx2-2,Tef,Etv5
GO:0048666	8,5,9,6	neuron development	303	0.0207	10	0.0235	0.118279	E	Ctf1,Nrp1,Stxbp1,Fscn2,Th,Shh,Tbce,Metrn,Spnb4,Evl
GO:0051056	7,8,6	regulation of small GTPase mediated signal transduction	183	0.0125	7	0.0165	0.118443	E	Cyth1,Arhgef15,Gapvd1,Fbxo8,Cyth3,Arhgef1,Vav2
GO:0010648	6,4,5	negative regulation of cell communication	147	0.01	6	0.0141	0.118916	E	P2rx7,Nfkbia,Stxbp1,Dkk1,Cln3,Ddit4
GO:0031327	7,5,6	negative regulation of cellular biosynthetic process	354	0.0241	11	0.0259	0.119565	E	Foxh1,Zfpm1,Kcnip3,Snw1,Wdtc1,Sirt4,Sox9,Klf11,Timeless,Hr,Purb
GO:0042063	6,7	gliogenesis	50	0.0034	3	0.0071	0.119899	E	Shh,Nkx2-2,Metrn
GO:0035107	5,4	appendage morphogenesis	113	0.0077	5	0.0118	0.12014	E	Fto,Dkk1,Shh,Rpgrip1l,Rdh10
GO:0035108	6,5	limb morphogenesis	113	0.0077	5	0.0118	0.12014	E	Fto,Dkk1,Shh,Rpgrip1l,Rdh10
GO:0009117	7	nucleotide metabolic process	264	0.018	9	0.0212	0.120444	E	Rpia,Nt5c3,Atp5c1,Dera,Lonp1,Gnai2,Atp5j2,Ampd3,Ghrh
GO:0006753	6	nucleoside phosphate metabolic process	264	0.018	9	0.0212	0.120444	E	Rpia,Nt5c3,Atp5c1,Dera,Lonp1,Gnai2,Atp5j2,Ampd3,Ghrh
GO:0045892	9,8,10,7,6	negative regulation of transcription, DNA-dependent	264	0.018	9	0.0212	0.120444	E	Foxh1,Zfpm1,Kcnip3,Wdtc1,Sirt4,Sox9,Klf11,Timeless,Purb
GO:0006325	5	establishment or maintenance of chromatin architecture	310	0.0211	10	0.0235	0.121448	E	Suv420h2,L3mbtl2,Hist1h2ah,Smyd3,Tssk6,Smarcal1,H3f3b,Hist1h4j,H2afy2,Arid1a
GO:0007569	3,4	cell aging	24	0.0016	2	0.0047	0.121474	E	Xrn1,Dnaja3
GO:0051656	5,3,4	establishment of organelle localization	24	0.0016	2	0.0047	0.121474	E	Nusap1,Npm1
GO:0021532	5,7,8,6	neural tube patterning	24	0.0016	2	0.0047	0.121474	E	Shh,Rpgrip1l
GO:0030042	8,6,7,5	actin filament depolymerization	24	0.0016	2	0.0047	0.121474	E	Capg,Evl
GO:0060445	7,6,8,9,5	branching involved in salivary gland morphogenesis	24	0.0016	2	0.0047	0.121474	E	Nrp1,Shh
GO:0030834	10,6,9,8,7,5	regulation of actin filament depolymerization	24	0.0016	2	0.0047	0.121474	E	Capg,Evl
GO:0002791	7,6	regulation of peptide secretion	24	0.0016	2	0.0047	0.121474	E	Sirt4,Ghrh
GO:0007409	6,8,7,11,9,12,10	axonogenesis	187	0.0128	7	0.0165	0.122865	E	Nrp1,Stxbp1,Shh,Tbce,Metrn,Spnb4,Evl
GO:0048534	5,6,4	hemopoietic or lymphoid organ development	315	0.0215	10	0.0235	0.123356	E	Dclre1c,Cd83,Nfkbia,Dnaja3,Fech,Shh,Klf11,Ppp3cb,Tob2,Il11ra1
GO:0046661	4,5,6	male sex differentiation	51	0.0035	3	0.0071	0.123713	E	Hmgb2,Sox9,Shh
GO:0015992	5,7,6,8	proton transport	51	0.0035	3	0.0071	0.123713	E	Atp5c1,Atp5j2,Slc36a1
GO:0006818	4,5	hydrogen transport	51	0.0035	3	0.0071	0.123713	E	Atp5c1,Atp5j2,Slc36a1
GO:0016477	5,6,4	cell migration	271	0.0185	9	0.0212	0.124586	E	Fmnl1,Nrp1,Nrp2,Ccr4,Katna1,Aimp1,Shh,Vav2,Bcar1
GO:0046578	8,9,7	regulation of Ras protein signal transduction	151	0.0103	6	0.0141	0.124595	E	Cyth1,Arhgef15,Fbxo8,Cyth3,Arhgef1,Vav2
GO:0046483	4	heterocycle metabolic process	82	0.0056	4	0.0094	0.124721	E	Uros,Fech,Gch1,Ampd3
GO:0045944	10,9,11,8,7	positive regulation of transcription from RNA polymerase II promoter	324	0.0221	10	0.0235	0.126031	E	Hmgb2,Foxh1,Sox8,Snw1,Npas4,Sox9,Ablim2,Shh,Nkx2-2,Tef
GO:0000904	5,6,7	cell morphogenesis involved in differentiation	231	0.0158	8	0.0188	0.126553	E	Nrp1,Stxbp1,Sox9,Shh,Tbce,Metrn,Spnb4,Evl
GO:0006836	4,5	neurotransmitter transport	83	0.0057	4	0.0094	0.127252	E	P2rx7,Syn3,Sv2c,Stx4a
GO:0048589	3	developmental growth	83	0.0057	4	0.0094	0.127252	E	Sox9,Shh,Tbce,Rdh10
GO:0051028	5,7,6,8	mRNA transport	52	0.0035	3	0.0071	0.127495	E	Nup188,Nup54,Nup93
GO:0001824	4,7,8	blastocyst development	52	0.0035	3	0.0071	0.127495	E	Dad1,Xab2,N4bp2l2
GO:0048736	4	appendage development	117	0.008	5	0.0118	0.127547	E	Fto,Dkk1,Shh,Rpgrip1l,Rdh10
GO:0060173	5	limb development	117	0.008	5	0.0118	0.127547	E	Fto,Dkk1,Shh,Rpgrip1l,Rdh10
GO:0002520	5,3	immune system development	334	0.0228	10	0.0235	0.127853	E	Dclre1c,Cd83,Nfkbia,Dnaja3,Fech,Shh,Klf11,Ppp3cb,Tob2,Il11ra1
GO:0051783	6,5	regulation of nuclear division	25	0.0017	2	0.0047	0.12822	E	Nusap1,Herc2
GO:0035136	7,6	forelimb morphogenesis	25	0.0017	2	0.0047	0.12822	E	Rpgrip1l,Rdh10
GO:0007088	7,6,9,8,5	regulation of mitosis	25	0.0017	2	0.0047	0.12822	E	Nusap1,Herc2
GO:0007530	4,5	sex determination	25	0.0017	2	0.0047	0.12822	E	Srd5a1,Sox9
GO:0031365	9,8	N-terminal protein amino acid modification	5	0.0003	1	0.0024	0.128902	E	Nmt1
GO:0033146	8,10,7,9	regulation of estrogen receptor signaling pathway	5	0.0003	1	0.0024	0.128902	E	Skp2
GO:0042891	5,6	antibiotic transport	5	0.0003	1	0.0024	0.128902	E	Slc22a18
GO:0009083	7,8	branched chain family amino acid catabolic process	5	0.0003	1	0.0024	0.128902	E	Bcat2
GO:0060666	8,7,9,10,6	dichotomous subdivision of terminal units involved in salivary gland branching	5	0.0003	1	0.0024	0.128902	E	Nrp1
GO:0060662	6,8,7,9	salivary gland cavitation	5	0.0003	1	0.0024	0.128902	E	Shh
GO:0015074	7,6	DNA integration	5	0.0003	1	0.0024	0.128902	E	Gin1
GO:0000086	8,5,6,7,4	G2/M transition of mitotic cell cycle	5	0.0003	1	0.0024	0.128902	E	Brsk1
GO:0042416	8,9	dopamine biosynthetic process	5	0.0003	1	0.0024	0.128902	E	Th
GO:0051954	6,7,5,4	positive regulation of amine transport	5	0.0003	1	0.0024	0.128902	E	P2rx7
GO:0060762	7,6,9,8,10,11,12,5	regulation of branching involved in mammary gland duct morphogenesis	5	0.0003	1	0.0024	0.128902	E	Etv5
GO:0046605	8,7,9,6,5	regulation of centrosome cycle	5	0.0003	1	0.0024	0.128902	E	Npm1
GO:0016188	7,5,6,4,8	synaptic vesicle maturation	5	0.0003	1	0.0024	0.128902	E	Stxbp1
GO:0046697	5,7,6,8,4	decidualization	5	0.0003	1	0.0024	0.128902	E	Il11ra1
GO:0043555	8,9,7,5	regulation of translation in response to stress	5	0.0003	1	0.0024	0.128902	E	Fech
GO:0019430	6	removal of superoxide radicals	5	0.0003	1	0.0024	0.128902	E	Fancc
GO:0018409	10,9	peptide or protein amino-terminal blocking	5	0.0003	1	0.0024	0.128902	E	Nmt1
GO:0032105	7,5,6	negative regulation of response to extracellular stimulus	5	0.0003	1	0.0024	0.128902	E	Cln3
GO:0001881	6,5	receptor recycling	5	0.0003	1	0.0024	0.128902	E	Ache
GO:0002710	9,10,7,8	negative regulation of T cell mediated immunity	5	0.0003	1	0.0024	0.128902	E	Ppp3cb
GO:0032611	5	interleukin-1 beta production	5	0.0003	1	0.0024	0.128902	E	P2rx7
GO:0006213	7	pyrimidine nucleoside metabolic process	5	0.0003	1	0.0024	0.128902	E	Cda
GO:0060438	5,6	trachea development	5	0.0003	1	0.0024	0.128902	E	Shh
GO:0010506	7,6	regulation of autophagy	5	0.0003	1	0.0024	0.128902	E	Cln3
GO:0050715	7,8,10,9,5,6	positive regulation of cytokine secretion	5	0.0003	1	0.0024	0.128902	E	P2rx7
GO:0043550	10,7,9,6	regulation of lipid kinase activity	5	0.0003	1	0.0024	0.128902	E	Vav2
GO:0048934	8,9,6,7	peripheral nervous system neuron differentiation	5	0.0003	1	0.0024	0.128902	E	Tbce
GO:0000080	7,8,6	G1 phase of mitotic cell cycle	5	0.0003	1	0.0024	0.128902	E	Cdc123
GO:0051318	6,7,5	G1 phase	5	0.0003	1	0.0024	0.128902	E	Cdc123
GO:0060605	5,7,6	tube lumen cavitation	5	0.0003	1	0.0024	0.128902	E	Shh
GO:0043551	11,8,10,7	regulation of phosphoinositide 3-kinase activity	5	0.0003	1	0.0024	0.128902	E	Vav2
GO:0006685	8,7,9	sphingomyelin catabolic process	5	0.0003	1	0.0024	0.128902	E	Enpp7
GO:0032060	5	bleb formation	5	0.0003	1	0.0024	0.128902	E	P2rx7
GO:0043552	11,12,9,8,10	positive regulation of phosphoinositide 3-kinase activity	5	0.0003	1	0.0024	0.128902	E	Vav2
GO:0050701	8,6,7,9,5	interleukin-1 secretion	5	0.0003	1	0.0024	0.128902	E	P2rx7
GO:0032652	6,5	regulation of interleukin-1 production	5	0.0003	1	0.0024	0.128902	E	P2rx7
GO:0032108	8,6,7	negative regulation of response to nutrient levels	5	0.0003	1	0.0024	0.128902	E	Cln3
GO:0032612	4	interleukin-1 production	5	0.0003	1	0.0024	0.128902	E	P2rx7
GO:0042136	6,8,9,5	neurotransmitter biosynthetic process	5	0.0003	1	0.0024	0.128902	E	Th
GO:0042439	7	ethanolamine and derivative metabolic process	5	0.0003	1	0.0024	0.128902	E	Ache
GO:0006085	7	acetyl-CoA biosynthetic process	5	0.0003	1	0.0024	0.128902	E	Acly
GO:0032651	7,6	regulation of interleukin-1 beta production	5	0.0003	1	0.0024	0.128902	E	P2rx7
GO:0060123	7,8,9,6,10	regulation of growth hormone secretion	5	0.0003	1	0.0024	0.128902	E	Ghrh
GO:0045213	6,7,5	neurotransmitter receptor metabolic process	5	0.0003	1	0.0024	0.128902	E	Ache
GO:0042541	6	hemoglobin biosynthetic process	5	0.0003	1	0.0024	0.128902	E	Fech
GO:0043558	9,10,8,6,5	regulation of translational initiation in response to stress	5	0.0003	1	0.0024	0.128902	E	Fech
GO:0032845	5,6,3,4	negative regulation of homeostatic process	5	0.0003	1	0.0024	0.128902	E	P2rx7
GO:0043484	8,7,9,6	regulation of RNA splicing	5	0.0003	1	0.0024	0.128902	E	Npm1
GO:0045851	10	pH reduction	5	0.0003	1	0.0024	0.128902	E	Cln6
GO:0060562	8,7,6,9,5	epithelial tube morphogenesis	119	0.0081	5	0.0118	0.131117	E	Fzd3,Shh,Timeless,Rdh10,Etv5
GO:0030384	7,8	phosphoinositide metabolic process	53	0.0036	3	0.0071	0.13124	E	Dpm2,Pigv,Pip5kl1
GO:0009880	4,5	embryonic pattern specification	53	0.0036	3	0.0071	0.13124	E	Nrp1,Shh,Rpgrip1l
GO:0001501	5	skeletal system development	294	0.0201	9	0.0212	0.13341	E	P2rx7,Jund,Smurf1,Wdr5,Sox9,Shh,Rdh10,Tob2,Acp2
GO:0048812	5,7,6,10,8,11,9	neuron projection morphogenesis	198	0.0135	7	0.0165	0.133629	E	Nrp1,Stxbp1,Shh,Tbce,Metrn,Spnb4,Evl
GO:0007018	4	microtubule-based movement	86	0.0059	4	0.0094	0.134674	E	Tuba1b,Kif2c,Tubb2b,Tubb3
GO:0040018	6,4,5	positive regulation of multicellular organism growth	26	0.0018	2	0.0047	0.13489	E	Spnb4,Ghrh
GO:0030837	9,10,8,11,7,6	negative regulation of actin filament polymerization	26	0.0018	2	0.0047	0.13489	E	Capg,Evl
GO:0033013	5	tetrapyrrole metabolic process	26	0.0018	2	0.0047	0.13489	E	Uros,Fech
GO:0007163	5,6,3,7	establishment or maintenance of cell polarity	26	0.0018	2	0.0047	0.13489	E	Shh,Brsk1
GO:0006826	7,8,9	iron ion transport	26	0.0018	2	0.0047	0.13489	E	Mfi2,Sfxn2
GO:0009166	5,8	nucleotide catabolic process	26	0.0018	2	0.0047	0.13489	E	Dera,Lonp1
GO:0006778	5,6	porphyrin metabolic process	26	0.0018	2	0.0047	0.13489	E	Uros,Fech
GO:0042461	9,6,10,7	photoreceptor cell development	26	0.0018	2	0.0047	0.13489	E	Fscn2,Th
GO:0007612	7,5	learning	54	0.0037	3	0.0071	0.134945	E	Vdac3,Cln3,Th
GO:0042158	6	lipoprotein biosynthetic process	54	0.0037	3	0.0071	0.134945	E	Dpm2,Nmt1,Pigv
GO:0048667	6,9,7,10,8	cell morphogenesis involved in neuron differentiation	201	0.0137	7	0.0165	0.136177	E	Nrp1,Stxbp1,Shh,Tbce,Metrn,Spnb4,Evl
GO:0022612	5,6,7,4	gland morphogenesis	87	0.0059	4	0.0094	0.137086	E	Nrp1,Sox9,Shh,Etv5
GO:0006665	6,7	sphingolipid metabolic process	55	0.0038	3	0.0071	0.138606	E	P2rx7,Cln6,Enpp7
GO:0001656	6,7	metanephros development	55	0.0038	3	0.0071	0.138606	E	Shh,Timeless,Rdh10
GO:0048858	4,5,6,7	cell projection morphogenesis	205	0.014	7	0.0165	0.139297	E	Nrp1,Stxbp1,Shh,Tbce,Metrn,Spnb4,Evl
GO:0045137	4,5,6	development of primary sexual characteristics	88	0.006	4	0.0094	0.139465	E	Hmgb2,Sox9,Shh,Rdh10
GO:0006417	7,8,6	regulation of translation	88	0.006	4	0.0094	0.139465	E	Eif4e3,Eif2c2,Fech,Tnrc6b
GO:0010608	7,6	posttranscriptional regulation of gene expression	124	0.0085	5	0.0118	0.1396	E	Eif4e3,Ifi30,Eif2c2,Fech,Tnrc6b
GO:0035239	5,4	tube morphogenesis	163	0.0111	6	0.0141	0.139711	E	Nrp1,Fzd3,Shh,Timeless,Rdh10,Etv5
GO:0016042	4,5	lipid catabolic process	125	0.0085	5	0.0118	0.141215	E	Enpp7,Phyh,Plbd2,Plcxd3,Pla2g6
GO:0051240	5,3,4	positive regulation of multicellular organismal process	125	0.0085	5	0.0118	0.141215	E	P2rx7,Cd83,Spnb4,Tob2,Ghrh
GO:0006084	6	acetyl-CoA metabolic process	27	0.0018	2	0.0047	0.14147	E	Idh1,Acly
GO:0014070	5	response to organic cyclic substance	27	0.0018	2	0.0047	0.14147	E	P2rx7,Cd83
GO:0032272	8,9,7,6,5	negative regulation of protein polymerization	27	0.0018	2	0.0047	0.14147	E	Capg,Evl
GO:0031333	6,7,5,4	negative regulation of protein complex assembly	27	0.0018	2	0.0047	0.14147	E	Capg,Evl
GO:0060740	7,8,9,6	prostate gland epithelium morphogenesis	27	0.0018	2	0.0047	0.14147	E	Sox9,Shh
GO:0007204	12,10	elevation of cytosolic calcium ion concentration	27	0.0018	2	0.0047	0.14147	E	P2rx7,Trpc2
GO:0046148	4	pigment biosynthetic process	27	0.0018	2	0.0047	0.14147	E	Uros,Fech
GO:0006672	8,9	ceramide metabolic process	27	0.0018	2	0.0047	0.14147	E	P2rx7,Cln6
GO:0007015	6,5	actin filament organization	89	0.0061	4	0.0094	0.141809	E	Capg,Arpc2,Evl,Actr3b
GO:0043066	8,7,6,5	negative regulation of apoptosis	209	0.0143	7	0.0165	0.142094	E	Bag3,Dad1,Apbb3,Tmbim6,Cln3,Skp2,Eef1a2
GO:0051604	6,5	protein maturation	90	0.0061	4	0.0094	0.144116	E	P2rx7,Cln3,Shh,Serpinh1
GO:0032990	4,5,6	cell part morphogenesis	213	0.0145	7	0.0165	0.14456	E	Nrp1,Stxbp1,Shh,Tbce,Metrn,Spnb4,Evl
GO:0043069	7,6,5,4	negative regulation of programmed cell death	214	0.0146	7	0.0165	0.145124	E	Bag3,Dad1,Apbb3,Tmbim6,Cln3,Skp2,Eef1a2
GO:0060548	6,4,5	negative regulation of cell death	215	0.0147	7	0.0165	0.145667	E	Bag3,Dad1,Apbb3,Tmbim6,Cln3,Skp2,Eef1a2
GO:0006643	5,6	membrane lipid metabolic process	57	0.0039	3	0.0071	0.145783	E	P2rx7,Cln6,Enpp7
GO:0015837	4,5	amine transport	91	0.0062	4	0.0094	0.146386	E	P2rx7,Slc7a5,Cln3,Slc36a1
GO:0032940	5,3,4,6	secretion by cell	217	0.0148	7	0.0165	0.14669	E	P2rx7,Syn3,Stxbp1,Exoc4,Stx4a,Sirt4,Ghrh
GO:0002009	7,6,8,5	morphogenesis of an epithelium	219	0.0149	7	0.0165	0.147629	E	Nrp1,Fzd3,Sox9,Shh,Timeless,Rdh10,Etv5
GO:0060429	6,7,5	epithelium development	219	0.0149	7	0.0165	0.147629	E	Nrp1,Fzd3,Sox9,Shh,Timeless,Rdh10,Etv5
GO:0001658	7,9,8,6,10,5	branching involved in ureteric bud morphogenesis	28	0.0019	2	0.0047	0.147948	E	Shh,Timeless
GO:0060675	5,8,9,4	ureteric bud morphogenesis	28	0.0019	2	0.0047	0.147948	E	Shh,Timeless
GO:0051705	3,4	behavioral interaction between organisms	28	0.0019	2	0.0047	0.147948	E	Trpc2,Th
GO:0006506	8,9,10	GPI anchor biosynthetic process	28	0.0019	2	0.0047	0.147948	E	Dpm2,Pigv
GO:0048645	4,6,7,5	organ formation	28	0.0019	2	0.0047	0.147948	E	Shh,Rdh10
GO:0046489	7,8,9	phosphoinositide biosynthetic process	28	0.0019	2	0.0047	0.147948	E	Dpm2,Pigv
GO:0044236	3	multicellular organismal metabolic process	28	0.0019	2	0.0047	0.147948	E	P2rx7,Serpinh1
GO:0060512	6,7,8,5	prostate gland morphogenesis	28	0.0019	2	0.0047	0.147948	E	Sox9,Shh
GO:0044271	5	nitrogen compound biosynthetic process	92	0.0063	4	0.0094	0.148618	E	Cbs,Bcat2,Th,Adc
GO:0048568	5,6,4	embryonic organ development	58	0.004	3	0.0071	0.149292	E	Th,Shh,Rdh10
GO:0043414	6	biopolymer methylation	58	0.004	3	0.0071	0.149292	E	Suv420h2,Mbd4,Gspt1
GO:0006924	9,8,6	activation-induced cell death of T cells	6	0.0004	1	0.0024	0.150206	E	Dnaja3
GO:0060600	6,8,7,9,5	dichotomous subdivision of an epithelial terminal unit	6	0.0004	1	0.0024	0.150206	E	Nrp1
GO:0021937	8,5,9,6,7,10,11,12,13,14	Purkinje cell-granule cell precursor cell signaling involved in regulation of granule cell precursor cell proliferation	6	0.0004	1	0.0024	0.150206	E	Shh
GO:0000819	5,4	sister chromatid segregation	6	0.0004	1	0.0024	0.150206	E	Nusap1
GO:0045833	6,7,4,5	negative regulation of lipid metabolic process	6	0.0004	1	0.0024	0.150206	E	Wdtc1
GO:0007413	7,9,8,5,12,10,13,11	axonal fasciculation	6	0.0004	1	0.0024	0.150206	E	Nrp1
GO:0032331	7,6,5,8,9,10	negative regulation of chondrocyte differentiation	6	0.0004	1	0.0024	0.150206	E	Sox9
GO:0006729	7	tetrahydrobiopterin biosynthetic process	6	0.0004	1	0.0024	0.150206	E	Gch1
GO:0048703	8,6,9,10,7,5	embryonic viscerocranium morphogenesis	6	0.0004	1	0.0024	0.150206	E	Rdh10
GO:0007442	7,5,9,8,10,6,4	hindgut morphogenesis	6	0.0004	1	0.0024	0.150206	E	Shh
GO:0009264	6,9	deoxyribonucleotide catabolic process	6	0.0004	1	0.0024	0.150206	E	Dera
GO:0051153	7,6,9,8,10	regulation of striated muscle cell differentiation	6	0.0004	1	0.0024	0.150206	E	Shh
GO:0048596	8,9,10,7,4,5,6	embryonic camera-type eye morphogenesis	6	0.0004	1	0.0024	0.150206	E	Th
GO:0032042	6,7	mitochondrial DNA metabolic process	6	0.0004	1	0.0024	0.150206	E	Dnaja3
GO:0006563	7,8	L-serine metabolic process	6	0.0004	1	0.0024	0.150206	E	Cbs
GO:0014015	9,8,7,10	positive regulation of gliogenesis	6	0.0004	1	0.0024	0.150206	E	Shh
GO:0006534	7,8,6	cysteine metabolic process	6	0.0004	1	0.0024	0.150206	E	Cbs
GO:0032494	6,5,7	response to peptidoglycan	6	0.0004	1	0.0024	0.150206	E	Nfkbia
GO:0015812	7,8,9	gamma-aminobutyric acid transport	6	0.0004	1	0.0024	0.150206	E	P2rx7
GO:0060685	6,7,8,9,10,11,12,5	regulation of prostatic bud formation	6	0.0004	1	0.0024	0.150206	E	Shh
GO:0006882	10,8	cellular zinc ion homeostasis	6	0.0004	1	0.0024	0.150206	E	Slc30a1
GO:0045687	10,9,8,11,6,7	positive regulation of glial cell differentiation	6	0.0004	1	0.0024	0.150206	E	Shh
GO:0001779	7,9,10,8,6	natural killer cell differentiation	6	0.0004	1	0.0024	0.150206	E	Il11ra1
GO:0033205	5,4	cytokinesis during cell cycle	6	0.0004	1	0.0024	0.150206	E	Nusap1
GO:0009146	7,10	purine nucleoside triphosphate catabolic process	6	0.0004	1	0.0024	0.150206	E	Lonp1
GO:0000070	6,7,9,8,5	mitotic sister chromatid segregation	6	0.0004	1	0.0024	0.150206	E	Nusap1
GO:0046639	11,9,10,8,7,12,13	negative regulation of alpha-beta T cell differentiation	6	0.0004	1	0.0024	0.150206	E	Shh
GO:0032438	6,5	melanosome organization	6	0.0004	1	0.0024	0.150206	E	Cno
GO:0007350	5,6,7	blastoderm segmentation	6	0.0004	1	0.0024	0.150206	E	Rpgrip1l
GO:0032733	7,5,6	positive regulation of interleukin-10 production	6	0.0004	1	0.0024	0.150206	E	Cd83
GO:0032469	11,9	endoplasmic reticulum calcium ion homeostasis	6	0.0004	1	0.0024	0.150206	E	Itpr1
GO:0006929	6,7,5	substrate-bound cell migration	6	0.0004	1	0.0024	0.150206	E	Fmnl1
GO:0042307	8,7,9,10,11,6,5	positive regulation of protein import into nucleus	6	0.0004	1	0.0024	0.150206	E	Shh
GO:0014051	6,4,8,9,10	gamma-aminobutyric acid secretion	6	0.0004	1	0.0024	0.150206	E	P2rx7
GO:0006264	7,9,8	mitochondrial DNA replication	6	0.0004	1	0.0024	0.150206	E	Dnaja3
GO:0030036	5,4	actin cytoskeleton organization	174	0.0119	6	0.0141	0.150597	E	Pfn3,Capg,Fmnl1,Arpc2,Evl,Actr3b
GO:0031175	4,9,6,10,7	neuron projection development	230	0.0157	7	0.0165	0.15129	E	Nrp1,Stxbp1,Shh,Tbce,Metrn,Spnb4,Evl
GO:0008284	6,4,5	positive regulation of cell proliferation	231	0.0158	7	0.0165	0.151498	E	Traf5,Dnaja3,Shh,Mdm4,Npm1,Ghrh,Il11ra1
GO:0035295	4	tube development	235	0.016	7	0.0165	0.152126	E	Foxh1,Nrp1,Fzd3,Shh,Timeless,Rdh10,Etv5
GO:0007626	4	locomotory behavior	237	0.0162	7	0.0165	0.15232	E	Lsp1,Cln6,Nrp2,Ccr4,Th,Tbce,Spnb4
GO:0006887	6,4,5,7	exocytosis	94	0.0064	4	0.0094	0.152959	E	P2rx7,Stxbp1,Exoc4,Stx4a
GO:0006334	5,7,6,8	nucleosome assembly	94	0.0064	4	0.0094	0.152959	E	Hist1h2ah,H3f3b,Hist1h4j,H2afy2
GO:0006732	5	coenzyme metabolic process	133	0.0091	5	0.0118	0.153046	E	Coq6,Idh1,Rpia,Gch1,Acly
GO:0030282	6,7,8,4	bone mineralization	29	0.002	2	0.0047	0.154313	E	P2rx7,Sox9
GO:0042401	7,6	biogenic amine biosynthetic process	29	0.002	2	0.0047	0.154313	E	Th,Adc
GO:0046519	7,8	sphingoid metabolic process	29	0.002	2	0.0047	0.154313	E	P2rx7,Cln6
GO:0032269	7,8,5,6	negative regulation of cellular protein metabolic process	95	0.0065	4	0.0094	0.155067	E	Capg,Cln3,Shh,Evl
GO:0007266	9,8	Rho protein signal transduction	95	0.0065	4	0.0094	0.155067	E	Arhgef15,Cdc42ep1,Arhgef1,Vav2
GO:0044092	4	negative regulation of molecular function	95	0.0065	4	0.0094	0.155067	E	Nfkbia,Dnaja3,Cln3,Gnai2
GO:0048747	5,6,7	muscle fiber development	60	0.0041	3	0.0071	0.156135	E	Chrna1,Shh,Ptcd2
GO:0031497	4,7	chromatin assembly	96	0.0065	4	0.0094	0.157131	E	Hist1h2ah,H3f3b,Hist1h4j,H2afy2
GO:0034728	5,6,4	nucleosome organization	96	0.0065	4	0.0094	0.157131	E	Hist1h2ah,H3f3b,Hist1h4j,H2afy2
GO:0006730	4	one-carbon compound metabolic process	97	0.0066	4	0.0094	0.159152	E	Suv420h2,Mbd4,Car5a,Gspt1
GO:0030029	3	actin filament-based process	187	0.0128	6	0.0141	0.15938	E	Pfn3,Capg,Fmnl1,Arpc2,Evl,Actr3b
GO:0009108	6	coenzyme biosynthetic process	61	0.0042	3	0.0071	0.159465	E	Coq6,Gch1,Acly
GO:0046530	8,9,6	photoreceptor cell differentiation	30	0.002	2	0.0047	0.160555	E	Fscn2,Th
GO:0001910	5,7,4,6	regulation of leukocyte mediated cytotoxicity	30	0.002	2	0.0047	0.160555	E	P2rx7,Ppp3cb
GO:0009411	6	response to UV	30	0.002	2	0.0047	0.160555	E	Fech,Brsk1
GO:0031341	4,3	regulation of cell killing	30	0.002	2	0.0047	0.160555	E	P2rx7,Ppp3cb
GO:0007422	6,5	peripheral nervous system development	30	0.002	2	0.0047	0.160555	E	Sox8,Tbce
GO:0043388	6	positive regulation of DNA binding	30	0.002	2	0.0047	0.160555	E	Shh,Ikbkb
GO:0031016	5,6	pancreas development	30	0.002	2	0.0047	0.160555	E	Shh,Nkx2-2
GO:0006261	8,7	DNA-dependent DNA replication	30	0.002	2	0.0047	0.160555	E	Dnaja3,Mcm6
GO:0006505	8,9	GPI anchor metabolic process	30	0.002	2	0.0047	0.160555	E	Dpm2,Pigv
GO:0007517	5,6	muscle organ development	194	0.0132	6	0.0141	0.162234	E	Dtnbp1,Utrn,Chrna1,Shh,Unc45a,Ptcd2
GO:0001708	6,5,4	cell fate specification	62	0.0042	3	0.0071	0.162729	E	Sox9,Shh,Nkx2-2
GO:0065002	7,4,6,5,8	intracellular protein transmembrane transport	62	0.0042	3	0.0071	0.162729	E	Nup188,Nup54,Nup93
GO:0000041	7,8	transition metal ion transport	62	0.0042	3	0.0071	0.162729	E	Mfi2,Slc30a1,Sfxn2
GO:0051248	7,6,5	negative regulation of protein metabolic process	99	0.0068	4	0.0094	0.163057	E	Capg,Cln3,Shh,Evl
GO:0006913	7,6	nucleocytoplasmic transport	99	0.0068	4	0.0094	0.163057	E	Ipo4,Nfkbia,Shh,Npm1
GO:0051049	5,4	regulation of transport	201	0.0137	6	0.0141	0.163802	E	P2rx7,Rab5b,Gapvd1,Sirt4,Shh,Ghrh
GO:0051169	6,5	nuclear transport	100	0.0068	4	0.0094	0.164939	E	Ipo4,Nfkbia,Shh,Npm1
GO:0030217	7,9,10,8,6	T cell differentiation	100	0.0068	4	0.0094	0.164939	E	Cd83,Dnaja3,Shh,Ppp3cb
GO:0080134	5,4	regulation of response to stress	144	0.0098	5	0.0118	0.165849	E	Nfkbia,Cbs,Fech,Cln3,Npm1
GO:0032880	5,4	regulation of protein localization	63	0.0043	3	0.0071	0.165925	E	P2rx7,Gapvd1,Shh
GO:0006606	8,9,7,6	protein import into nucleus	63	0.0043	3	0.0071	0.165925	E	Ipo4,Nfkbia,Shh
GO:0031214	6,7,5	biomineral formation	31	0.0021	2	0.0047	0.166665	E	P2rx7,Sox9
GO:0021515	5,7,8	cell differentiation in spinal cord	31	0.0021	2	0.0047	0.166665	E	Shh,Nkx2-2
GO:0046883	6,7,5,8	regulation of hormone secretion	31	0.0021	2	0.0047	0.166665	E	Sirt4,Ghrh
GO:0007435	6,7,8,5	salivary gland morphogenesis	31	0.0021	2	0.0047	0.166665	E	Nrp1,Shh
GO:0048562	6,7,5	embryonic organ morphogenesis	31	0.0021	2	0.0047	0.166665	E	Th,Shh
GO:0055072	9	iron ion homeostasis	31	0.0021	2	0.0047	0.166665	E	Mfi2,Fech
GO:0060041	8,4,9	retina development in camera-type eye	31	0.0021	2	0.0047	0.166665	E	Ache,Prph2
GO:0019233	7	sensory perception of pain	31	0.0021	2	0.0047	0.166665	E	P2rx7,Kcnip3
GO:0043549	9,6,8	regulation of kinase activity	146	0.01	5	0.0118	0.167719	E	P2rx7,Bccip,Cbs,Npm1,Vav2
GO:0050905	5	neuromuscular process	64	0.0044	3	0.0071	0.169052	E	Tpp1,Cln3,Gch1
GO:0051170	8,7	nuclear import	64	0.0044	3	0.0071	0.169052	E	Ipo4,Nfkbia,Shh
GO:0032434	7,8,9,12,11,10,6	regulation of proteasomal ubiquitin-dependent protein catabolic process	7	0.0005	1	0.0024	0.17017	E	Shh
GO:0048713	10,9,11,7,8	regulation of oligodendrocyte differentiation	7	0.0005	1	0.0024	0.17017	E	Shh
GO:0031122	6,5	cytoplasmic microtubule organization	7	0.0005	1	0.0024	0.17017	E	Katna1
GO:0006268	9,8	DNA unwinding during replication	7	0.0005	1	0.0024	0.17017	E	Mcm6
GO:0021772	7,4,5,9,10,11,6	olfactory bulb development	7	0.0005	1	0.0024	0.17017	E	Rpgrip1l
GO:0046146	6	tetrahydrobiopterin metabolic process	7	0.0005	1	0.0024	0.17017	E	Gch1
GO:0001736	6,9,8,10,5,7	establishment of planar polarity	7	0.0005	1	0.0024	0.17017	E	Fzd3
GO:0032508	8,7	DNA duplex unwinding	7	0.0005	1	0.0024	0.17017	E	Mcm6
GO:0015718	6,7	monocarboxylic acid transport	7	0.0005	1	0.0024	0.17017	E	P2rx7
GO:0051298	9,8,7,6,5	centrosome duplication	7	0.0005	1	0.0024	0.17017	E	Npm1
GO:0048147	7,5,6	negative regulation of fibroblast proliferation	7	0.0005	1	0.0024	0.17017	E	Ifi30
GO:0051881	9,7	regulation of mitochondrial membrane potential	7	0.0005	1	0.0024	0.17017	E	P2rx7
GO:0007164	5,4	establishment of tissue polarity	7	0.0005	1	0.0024	0.17017	E	Fzd3
GO:0014047	6,4,5,7	glutamate secretion	7	0.0005	1	0.0024	0.17017	E	P2rx7
GO:0051970	7,8,6,5	negative regulation of transmission of nerve impulse	7	0.0005	1	0.0024	0.17017	E	Stxbp1
GO:0030816	10,11,8,9	positive regulation of cAMP metabolic process	7	0.0005	1	0.0024	0.17017	E	Ghrh
GO:0030819	10,11,8,9,12	positive regulation of cAMP biosynthetic process	7	0.0005	1	0.0024	0.17017	E	Ghrh
GO:0046513	8,9,10	ceramide biosynthetic process	7	0.0005	1	0.0024	0.17017	E	P2rx7
GO:0021513	6,8,9,7	spinal cord dorsal/ventral patterning	7	0.0005	1	0.0024	0.17017	E	Shh
GO:0006817	7,8	phosphate transport	7	0.0005	1	0.0024	0.17017	E	Slc34a1
GO:0060664	5,7,8,9,6	epithelial cell proliferation involved in salivary gland morphogenesis	7	0.0005	1	0.0024	0.17017	E	Shh
GO:0032846	5,6,3,4	positive regulation of homeostatic process	7	0.0005	1	0.0024	0.17017	E	P2rx7
GO:0045840	8,7,6,9,10,5	positive regulation of mitosis	7	0.0005	1	0.0024	0.17017	E	Nusap1
GO:0048753	5,4	pigment granule organization	7	0.0005	1	0.0024	0.17017	E	Cno
GO:0051785	7,6,5	positive regulation of nuclear division	7	0.0005	1	0.0024	0.17017	E	Nusap1
GO:0009070	7,8	serine family amino acid biosynthetic process	7	0.0005	1	0.0024	0.17017	E	Cbs
GO:0055069	9	zinc ion homeostasis	7	0.0005	1	0.0024	0.17017	E	Slc30a1
GO:0051149	7,6,5	positive regulation of muscle cell differentiation	7	0.0005	1	0.0024	0.17017	E	Shh
GO:0032228	8,9,7	regulation of synaptic transmission, GABAergic	7	0.0005	1	0.0024	0.17017	E	Stxbp1
GO:0009154	7,10	purine ribonucleotide catabolic process	7	0.0005	1	0.0024	0.17017	E	Lonp1
GO:0045124	5,7,8,6,4	regulation of bone resorption	7	0.0005	1	0.0024	0.17017	E	P2rx7
GO:0030252	8,6,7,9	growth hormone secretion	7	0.0005	1	0.0024	0.17017	E	Ghrh
GO:0050805	8,9,6,7	negative regulation of synaptic transmission	7	0.0005	1	0.0024	0.17017	E	Stxbp1
GO:0051338	5	regulation of transferase activity	149	0.0102	5	0.0118	0.170254	E	P2rx7,Bccip,Cbs,Npm1,Vav2
GO:0060541	5	respiratory system development	103	0.007	4	0.0094	0.170301	E	Shh,Rpgrip1l,Timeless,Rdh10
GO:0006006	7,8	glucose metabolic process	103	0.007	4	0.0094	0.170301	E	Rpia,Aldoc,Wdtc1,Car5a
GO:0045597	6,5,4	positive regulation of cell differentiation	150	0.0102	5	0.0118	0.171027	E	Jund,Cd83,Shh,Nkx2-2,Metrn
GO:0032259	5	methylation	65	0.0044	3	0.0071	0.172108	E	Suv420h2,Mbd4,Gspt1
GO:0010817	4	regulation of hormone levels	152	0.0104	5	0.0118	0.172464	E	Srd5a1,Sirt4,Shh,Rdh10,Ghrh
GO:0043242	6,7,4,5	negative regulation of protein complex disassembly	32	0.0022	2	0.0047	0.172635	E	Capg,Evl
GO:0000377	10,9,8	RNA splicing, via transesterification reactions with bulged adenosine as nucleophile	32	0.0022	2	0.0047	0.172635	E	Snw1,Npm1
GO:0000398	9,11,8,10,7	nuclear mRNA splicing, via spliceosome	32	0.0022	2	0.0047	0.172635	E	Snw1,Npm1
GO:0000375	9,8,7	RNA splicing, via transesterification reactions	32	0.0022	2	0.0047	0.172635	E	Snw1,Npm1
GO:0051099	5	positive regulation of binding	32	0.0022	2	0.0047	0.172635	E	Shh,Ikbkb
GO:0003006	3,4	reproductive developmental process	153	0.0104	5	0.0118	0.173129	E	Srd5a1,Hmgb2,Sox9,Shh,Rdh10
GO:0009150	9	purine ribonucleotide metabolic process	105	0.0072	4	0.0094	0.17363	E	Atp5c1,Lonp1,Atp5j2,Ampd3
GO:0042157	5	lipoprotein metabolic process	66	0.0045	3	0.0071	0.17509	E	Dpm2,Nmt1,Pigv
GO:0034504	7	protein localization in nucleus	66	0.0045	3	0.0071	0.17509	E	Ipo4,Nfkbia,Shh
GO:0015674	6,7	di-, tri-valent inorganic cation transport	159	0.0108	5	0.0118	0.176367	E	P2rx7,Mfi2,Trpc2,Itpr1,Sfxn2
GO:0032496	6,5,7	response to lipopolysaccharide	33	0.0023	2	0.0047	0.178459	E	P2rx7,Nfkbia
GO:0008366	12,8,10,4,7	axon ensheathment	33	0.0023	2	0.0047	0.178459	E	Pmp22,Cldn11
GO:0051899	9,7	membrane depolarization	33	0.0023	2	0.0047	0.178459	E	P2rx7,4930506M07Rik
GO:0007272	11,7,9,3,6	ensheathment of neurons	33	0.0023	2	0.0047	0.178459	E	Pmp22,Cldn11
GO:0042398	6,5	cellular amino acid derivative biosynthetic process	33	0.0023	2	0.0047	0.178459	E	Th,Adc
GO:0007548	4,5	sex differentiation	110	0.0075	4	0.0094	0.181068	E	Hmgb2,Sox9,Shh,Rdh10
GO:0009259	8	ribonucleotide metabolic process	111	0.0076	4	0.0094	0.182402	E	Atp5c1,Lonp1,Atp5j2,Ampd3
GO:0006650	6,7	glycerophospholipid metabolic process	69	0.0047	3	0.0071	0.183579	E	Dpm2,Pigv,Pip5kl1
GO:0022900	5,4	electron transport chain	112	0.0076	4	0.0094	0.183683	E	Ndufa13,Ndufs2,Ndufb5,Txn2
GO:0042440	3	pigment metabolic process	34	0.0023	2	0.0047	0.184129	E	Uros,Fech
GO:0046634	9,8,7	regulation of alpha-beta T cell activation	34	0.0023	2	0.0047	0.184129	E	Cd83,Shh
GO:0016126	6,7,8	sterol biosynthetic process	34	0.0023	2	0.0047	0.184129	E	Hsd17b7,0610007P14Rik
GO:0006163	8	purine nucleotide metabolic process	113	0.0077	4	0.0094	0.184913	E	Atp5c1,Lonp1,Atp5j2,Ampd3
GO:0050767	7,6,8,5	regulation of neurogenesis	114	0.0078	4	0.0094	0.186091	E	Nrp1,Shh,Nkx2-2,Metrn
GO:0048608	4,5	reproductive structure development	114	0.0078	4	0.0094	0.186091	E	Hmgb2,Sox9,Shh,Rdh10
GO:0034754	6,4	cellular hormone metabolic process	70	0.0048	3	0.0071	0.186251	E	Srd5a1,Shh,Rdh10
GO:0006457	7,6	protein folding	115	0.0078	4	0.0094	0.187216	E	Tor3a,Dnaja3,Hspa8,Tbce
GO:0009314	4	response to radiation	116	0.0079	4	0.0094	0.18829	E	Mbd4,Dclre1c,Fech,Brsk1
GO:0050819	6,4,5	negative regulation of coagulation	8	0.0005	1	0.0024	0.188852	E	Anxa5
GO:0006354	9,7,8,6	RNA elongation	8	0.0005	1	0.0024	0.188852	E	Tcea2
GO:0000079	6,11,8,5,10	regulation of cyclin-dependent protein kinase activity	8	0.0005	1	0.0024	0.188852	E	Bccip
GO:0046520	7,8,9	sphingoid biosynthetic process	8	0.0005	1	0.0024	0.188852	E	P2rx7
GO:0042304	7,8,6,9	regulation of fatty acid biosynthetic process	8	0.0005	1	0.0024	0.188852	E	Wdtc1
GO:0007032	4	endosome organization	8	0.0005	1	0.0024	0.188852	E	Rab5b
GO:0030004	9,7	cellular monovalent inorganic cation homeostasis	8	0.0005	1	0.0024	0.188852	E	Cln6
GO:0000288	10,9	nuclear-transcribed mRNA catabolic process, deadenylation-dependent decay	8	0.0005	1	0.0024	0.188852	E	Dcps
GO:0021781	8,9,6,5	glial cell fate commitment	8	0.0005	1	0.0024	0.188852	E	Nkx2-2
GO:0060579	9,10,7,6	ventral spinal cord interneuron fate commitment	8	0.0005	1	0.0024	0.188852	E	Shh
GO:0019321	6,7	pentose metabolic process	8	0.0005	1	0.0024	0.188852	E	Rpia
GO:0006740	10,11,9	NADPH regeneration	8	0.0005	1	0.0024	0.188852	E	Rpia
GO:0030520	9,8	estrogen receptor signaling pathway	8	0.0005	1	0.0024	0.188852	E	Skp2
GO:0021988	6,4,8,9,10,5	olfactory lobe development	8	0.0005	1	0.0024	0.188852	E	Rpgrip1l
GO:0008593	7,8,6	regulation of Notch signaling pathway	8	0.0005	1	0.0024	0.188852	E	Nfkbia
GO:0031342	5,3,4	negative regulation of cell killing	8	0.0005	1	0.0024	0.188852	E	Ppp3cb
GO:0030838	9,10,8,11,7,6	positive regulation of actin filament polymerization	8	0.0005	1	0.0024	0.188852	E	Arpc2
GO:0006098	9,10,11,12	pentose-phosphate shunt	8	0.0005	1	0.0024	0.188852	E	Rpia
GO:0030517	8,10,9,12,11,6,7,13,14,15	negative regulation of axon extension	8	0.0005	1	0.0024	0.188852	E	Nrp1
GO:0009396	6,7,8	folic acid and derivative biosynthetic process	8	0.0005	1	0.0024	0.188852	E	Gch1
GO:0001893	4,6,7	maternal placenta development	8	0.0005	1	0.0024	0.188852	E	Il11ra1
GO:0032094	6	response to food	8	0.0005	1	0.0024	0.188852	E	Ghrh
GO:0021514	8,9,6,5	ventral spinal cord interneuron differentiation	8	0.0005	1	0.0024	0.188852	E	Shh
GO:0021521	10,11,8,7,6	ventral spinal cord interneuron specification	8	0.0005	1	0.0024	0.188852	E	Shh
GO:0032392	7,6	DNA geometric change	8	0.0005	1	0.0024	0.188852	E	Mcm6
GO:0009143	6,9	nucleoside triphosphate catabolic process	8	0.0005	1	0.0024	0.188852	E	Lonp1
GO:0046824	7,8,9,6,5	positive regulation of nucleocytoplasmic transport	8	0.0005	1	0.0024	0.188852	E	Shh
GO:0033198	5	response to ATP	8	0.0005	1	0.0024	0.188852	E	P2rx7
GO:0042278	7	purine nucleoside metabolic process	8	0.0005	1	0.0024	0.188852	E	Qtrt1
GO:0001911	6,7,8,4,5	negative regulation of leukocyte mediated cytotoxicity	8	0.0005	1	0.0024	0.188852	E	Ppp3cb
GO:0019794	6,7	nonprotein amino acid metabolic process	8	0.0005	1	0.0024	0.188852	E	Adc
GO:0002224	11,10,12,9,7	toll-like receptor signaling pathway	8	0.0005	1	0.0024	0.188852	E	Nfkbia
GO:0046128	8	purine ribonucleoside metabolic process	8	0.0005	1	0.0024	0.188852	E	Qtrt1
GO:0001573	8,9,10	ganglioside metabolic process	8	0.0005	1	0.0024	0.188852	E	Cln6
GO:0007431	6,7	salivary gland development	35	0.0024	2	0.0047	0.189639	E	Nrp1,Shh
GO:0051047	6,7,5,4	positive regulation of secretion	35	0.0024	2	0.0047	0.189639	E	P2rx7,Ghrh
GO:0033555	3,4	multicellular organismal response to stress	35	0.0024	2	0.0047	0.189639	E	Kcnip3,Vdac3
GO:0050769	8,7,6,9	positive regulation of neurogenesis	35	0.0024	2	0.0047	0.189639	E	Shh,Metrn
GO:0046632	8,10,11,9,7	alpha-beta T cell differentiation	35	0.0024	2	0.0047	0.189639	E	Cd83,Shh
GO:0008584	6,7,8	male gonad development	35	0.0024	2	0.0047	0.189639	E	Hmgb2,Sox9
GO:0008544	7,6,8,5	epidermis development	118	0.008	4	0.0094	0.190281	E	Sox9,Shh,Pphln1,Cst6
GO:0009566	4,3	fertilization	72	0.0049	3	0.0071	0.191353	E	Trpc2,Zpbp,Spnb4
GO:0035023	9,10,8	regulation of Rho protein signal transduction	73	0.005	3	0.0071	0.193781	E	Arhgef15,Arhgef1,Vav2
GO:0010033	4	response to organic substance	73	0.005	3	0.0071	0.193781	E	P2rx7,Cd83,Anxa5
GO:0055085	3,4,5	transmembrane transport	123	0.0084	4	0.0094	0.194355	E	Nup188,Nup54,Atp5c1,Nup93
GO:0006333	6	chromatin assembly or disassembly	123	0.0084	4	0.0094	0.194355	E	Hist1h2ah,H3f3b,Hist1h4j,H2afy2
GO:0030850	6,5,7	prostate gland development	36	0.0025	2	0.0047	0.194987	E	Sox9,Shh
GO:0050770	7,8,10,9,6,12,11,13	regulation of axonogenesis	36	0.0025	2	0.0047	0.194987	E	Nrp1,Metrn
GO:0008406	5,6,7	gonad development	74	0.005	3	0.0071	0.196125	E	Hmgb2,Sox9,Rdh10
GO:0065004	6,5	protein-DNA complex assembly	126	0.0086	4	0.0094	0.19619	E	Hist1h2ah,H3f3b,Hist1h4j,H2afy2
GO:0007398	6,7,5	ectoderm development	126	0.0086	4	0.0094	0.19619	E	Sox9,Shh,Pphln1,Cst6
GO:0051960	5,6,4	regulation of nervous system development	128	0.0087	4	0.0094	0.197165	E	Nrp1,Shh,Nkx2-2,Metrn
GO:0019318	6,7	hexose metabolic process	129	0.0088	4	0.0094	0.197579	E	Rpia,Aldoc,Wdtc1,Car5a
GO:0006605	7,6,8	protein targeting	129	0.0088	4	0.0094	0.197579	E	Ipo4,Syngr1,Nfkbia,Shh
GO:0005996	5,6	monosaccharide metabolic process	133	0.0091	4	0.0094	0.198758	E	Rpia,Aldoc,Wdtc1,Car5a
GO:0060284	6,5	regulation of cell development	135	0.0092	4	0.0094	0.199068	E	Nrp1,Shh,Nkx2-2,Metrn
GO:0006733	6	oxidoreduction coenzyme metabolic process	37	0.0025	2	0.0047	0.200166	E	Coq6,Rpia
GO:0019228	10,6,8	regulation of action potential in neuron	37	0.0025	2	0.0047	0.200166	E	Pmp22,Cldn11
GO:0051640	4	organelle localization	37	0.0025	2	0.0047	0.200166	E	Nusap1,Npm1
GO:0051261	7,6	protein depolymerization	37	0.0025	2	0.0047	0.200166	E	Capg,Evl
GO:0009991	4	response to extracellular stimulus	76	0.0052	3	0.0071	0.200563	E	P2rx7,Cln3,Ghrh
GO:0006694	6,5,7	steroid biosynthetic process	77	0.0053	3	0.0071	0.202654	E	Srd5a1,Hsd17b7,0610007P14Rik
GO:0007005	4	mitochondrion organization	78	0.0053	3	0.0071	0.204661	E	P2rx7,Dnaja3,Ptcd2
GO:0042098	7,6	T cell proliferation	78	0.0053	3	0.0071	0.204661	E	P2rx7,Dnaja3,Shh
GO:0046034	11	ATP metabolic process	78	0.0053	3	0.0071	0.204661	E	Atp5c1,Lonp1,Atp5j2
GO:0043244	5,6,4	regulation of protein complex disassembly	38	0.0026	2	0.0047	0.205174	E	Capg,Evl
GO:0046474	6,7,8	glycerophospholipid biosynthetic process	38	0.0026	2	0.0047	0.205174	E	Dpm2,Pigv
GO:0035272	5	exocrine system development	38	0.0026	2	0.0047	0.205174	E	Nrp1,Shh
GO:0031668	4,5	cellular response to extracellular stimulus	38	0.0026	2	0.0047	0.205174	E	P2rx7,Cln3
GO:0048488	6,5,7	synaptic vesicle endocytosis	9	0.0006	1	0.0024	0.20631	E	Stxbp1
GO:0030801	9,10,7,8	positive regulation of cyclic nucleotide metabolic process	9	0.0006	1	0.0024	0.20631	E	Ghrh
GO:0043372	12,10,11,9,8,13,14	positive regulation of CD4-positive, alpha beta T cell differentiation	9	0.0006	1	0.0024	0.20631	E	Cd83
GO:0006570	7,6,8	tyrosine metabolic process	9	0.0006	1	0.0024	0.20631	E	Th
GO:0043631	9,8,7	RNA polyadenylation	9	0.0006	1	0.0024	0.20631	E	Papolb
GO:0006596	8,7	polyamine biosynthetic process	9	0.0006	1	0.0024	0.20631	E	Adc
GO:0060052	6,5	neurofilament cytoskeleton organization	9	0.0006	1	0.0024	0.20631	E	Nefh
GO:0045981	8,9,6,7	positive regulation of nucleotide metabolic process	9	0.0006	1	0.0024	0.20631	E	Ghrh
GO:0030804	9,10,7,8,11	positive regulation of cyclic nucleotide biosynthetic process	9	0.0006	1	0.0024	0.20631	E	Ghrh
GO:0032653	6,5	regulation of interleukin-10 production	9	0.0006	1	0.0024	0.20631	E	Cd83
GO:0032107	7,6	regulation of response to nutrient levels	9	0.0006	1	0.0024	0.20631	E	Cln3
GO:0046676	7,8,9,10,6,5,11	negative regulation of insulin secretion	9	0.0006	1	0.0024	0.20631	E	Sirt4
GO:0006743	7,6	ubiquinone metabolic process	9	0.0006	1	0.0024	0.20631	E	Coq6
GO:0033143	7,9,6,8	regulation of steroid hormone receptor signaling pathway	9	0.0006	1	0.0024	0.20631	E	Skp2
GO:0034404	6	nucleobase, nucleoside and nucleotide biosynthetic process	9	0.0006	1	0.0024	0.20631	E	Qtrt1
GO:0060513	5,7,8,9,10,11,6	prostatic bud formation	9	0.0006	1	0.0024	0.20631	E	Shh
GO:0045862	8,9,6,7	positive regulation of proteolysis	9	0.0006	1	0.0024	0.20631	E	Cln6
GO:0006744	8,7	ubiquinone biosynthetic process	9	0.0006	1	0.0024	0.20631	E	Coq6
GO:0021940	7,8,5,6,9,10,11,12,13	positive regulation of granule cell precursor proliferation	9	0.0006	1	0.0024	0.20631	E	Shh
GO:0030810	8,9,6,7,10	positive regulation of nucleotide biosynthetic process	9	0.0006	1	0.0024	0.20631	E	Ghrh
GO:0006684	7,6,8	sphingomyelin metabolic process	9	0.0006	1	0.0024	0.20631	E	Enpp7
GO:0048708	8,9,6,7	astrocyte differentiation	9	0.0006	1	0.0024	0.20631	E	Shh
GO:0051932	7,8	synaptic transmission, GABAergic	9	0.0006	1	0.0024	0.20631	E	Stxbp1
GO:0001522	8,7	pseudouridine synthesis	9	0.0006	1	0.0024	0.20631	E	Rpusd1
GO:0021984	4,6,7,9,10,11,8	adenohypophysis development	9	0.0006	1	0.0024	0.20631	E	Ghrh
GO:0021936	6,7,5,8,10,11,12	regulation of granule cell precursor proliferation	9	0.0006	1	0.0024	0.20631	E	Shh
GO:0007379	5,6,7	segment specification	9	0.0006	1	0.0024	0.20631	E	Rpgrip1l
GO:0048557	7,8,6	embryonic digestive tract morphogenesis	9	0.0006	1	0.0024	0.20631	E	Shh
GO:0021511	5,7,8,6	spinal cord patterning	9	0.0006	1	0.0024	0.20631	E	Shh
GO:0002792	7,8,6,5	negative regulation of peptide secretion	9	0.0006	1	0.0024	0.20631	E	Sirt4
GO:0050707	7,9,8,6,5	regulation of cytokine secretion	9	0.0006	1	0.0024	0.20631	E	P2rx7
GO:0002793	7,8,6,5	positive regulation of peptide secretion	9	0.0006	1	0.0024	0.20631	E	Ghrh
GO:0033057	5,4	reproductive behavior in a multicellular organism	9	0.0006	1	0.0024	0.20631	E	Trpc2
GO:0007549	8,7	dosage compensation	9	0.0006	1	0.0024	0.20631	E	H2afy2
GO:0042135	6,8,9,5	neurotransmitter catabolic process	9	0.0006	1	0.0024	0.20631	E	Ache
GO:0034654	5	nucleobase, nucleoside, nucleotide and nucleic acid biosynthetic process	9	0.0006	1	0.0024	0.20631	E	Qtrt1
GO:0009261	6,9	ribonucleotide catabolic process	9	0.0006	1	0.0024	0.20631	E	Lonp1
GO:0045671	9,8,7,10,11,12	negative regulation of osteoclast differentiation	9	0.0006	1	0.0024	0.20631	E	Tob2
GO:0015804	6,7,8	neutral amino acid transport	9	0.0006	1	0.0024	0.20631	E	Slc36a1
GO:0000002	5	mitochondrial genome maintenance	9	0.0006	1	0.0024	0.20631	E	Dnaja3
GO:0051592	6	response to calcium ion	9	0.0006	1	0.0024	0.20631	E	P2rx7
GO:0032104	6,5	regulation of response to extracellular stimulus	9	0.0006	1	0.0024	0.20631	E	Cln3
GO:0040020	7,9,6,8,5	regulation of meiosis	9	0.0006	1	0.0024	0.20631	E	Fzr1
GO:0051129	5,3,4	negative regulation of cellular component organization	79	0.0054	3	0.0071	0.206583	E	Capg,Nrp1,Evl
GO:0048511	2	rhythmic process	79	0.0054	3	0.0071	0.206583	E	Hrh1,Tef,Timeless
GO:0017038	5,6,7	protein import	80	0.0055	3	0.0071	0.208419	E	Ipo4,Nfkbia,Shh
GO:0007611	6,4	learning or memory	80	0.0055	3	0.0071	0.208419	E	Vdac3,Cln3,Th
GO:0050885	6	neuromuscular process controlling balance	39	0.0027	2	0.0047	0.210008	E	Tpp1,Cln3
GO:0008652	6,7	cellular amino acid biosynthetic process	39	0.0027	2	0.0047	0.210008	E	Cbs,Bcat2
GO:0008213	9,8	protein amino acid alkylation	39	0.0027	2	0.0047	0.210008	E	Suv420h2,Gspt1
GO:0006662	4	glycerol ether metabolic process	39	0.0027	2	0.0047	0.210008	E	Txn2,Apob48r
GO:0006479	7,10,9	protein amino acid methylation	39	0.0027	2	0.0047	0.210008	E	Suv420h2,Gspt1
GO:0006576	6	biogenic amine metabolic process	81	0.0055	3	0.0071	0.21017	E	Ache,Th,Adc
GO:0008361	4	regulation of cell size	82	0.0056	3	0.0071	0.211837	E	Emp1,Wdtc1,Npm1
GO:0009791	4,3	post-embryonic development	82	0.0056	3	0.0071	0.211837	E	Itpr1,Tbce,Ccdc47
GO:0001889	5,6	liver development	40	0.0027	2	0.0047	0.214665	E	Rpgrip1l,Ptcd2
GO:0001909	3,4,5	leukocyte mediated cytotoxicity	40	0.0027	2	0.0047	0.214665	E	P2rx7,Ppp3cb
GO:0002237	5,4,6	response to molecule of bacterial origin	40	0.0027	2	0.0047	0.214665	E	P2rx7,Nfkbia
GO:0001906	2	cell killing	40	0.0027	2	0.0047	0.214665	E	P2rx7,Ppp3cb
GO:0010720	7,5,6	positive regulation of cell development	40	0.0027	2	0.0047	0.214665	E	Shh,Metrn
GO:0033365	6	protein localization in organelle	84	0.0057	3	0.0071	0.214915	E	Ipo4,Nfkbia,Shh
GO:0016485	7,6	protein processing	86	0.0059	3	0.0071	0.217656	E	P2rx7,Cln3,Shh
GO:0051050	5,6,4,3	positive regulation of transport	86	0.0059	3	0.0071	0.217656	E	P2rx7,Shh,Ghrh
GO:0032270	7,8,5,6	positive regulation of cellular protein metabolic process	86	0.0059	3	0.0071	0.217656	E	P2rx7,Cln6,Arpc2
GO:0009205	10	purine ribonucleoside triphosphate metabolic process	87	0.0059	3	0.0071	0.218901	E	Atp5c1,Lonp1,Atp5j2
GO:0001657	7,8,4	ureteric bud development	41	0.0028	2	0.0047	0.219144	E	Shh,Timeless
GO:0009199	9	ribonucleoside triphosphate metabolic process	88	0.006	3	0.0071	0.220064	E	Atp5c1,Lonp1,Atp5j2
GO:0045664	8,7,9,6	regulation of neuron differentiation	89	0.0061	3	0.0071	0.221145	E	Nrp1,Nkx2-2,Metrn
GO:0016331	6,8,7,9,5	morphogenesis of embryonic epithelium	90	0.0061	3	0.0071	0.222145	E	Fzd3,Shh,Rdh10
GO:0007098	8,6,5,4,7	centrosome cycle	10	0.0007	1	0.0024	0.222599	E	Npm1
GO:0006081	4	cellular aldehyde metabolic process	10	0.0007	1	0.0024	0.222599	E	Idh1
GO:0002507	3	tolerance induction	10	0.0007	1	0.0024	0.222599	E	Ccr4
GO:0060601	6,8,7,9,5	lateral sprouting from an epithelium	10	0.0007	1	0.0024	0.222599	E	Shh
GO:0002221	10,9,11,8,6	pattern recognition receptor signaling pathway	10	0.0007	1	0.0024	0.222599	E	Nfkbia
GO:0034614	6	cellular response to reactive oxygen species	10	0.0007	1	0.0024	0.222599	E	Pxdn
GO:0021534	4,5,7,8,9	cell proliferation in hindbrain	10	0.0007	1	0.0024	0.222599	E	Shh
GO:0009081	6,7	branched chain family amino acid metabolic process	10	0.0007	1	0.0024	0.222599	E	Bcat2
GO:0002052	9,7,8,5,6,10	positive regulation of neuroblast proliferation	10	0.0007	1	0.0024	0.222599	E	Shh
GO:0042744	5,6,8	hydrogen peroxide catabolic process	10	0.0007	1	0.0024	0.222599	E	Pxdn
GO:0032388	6,7,5,4	positive regulation of intracellular transport	10	0.0007	1	0.0024	0.222599	E	Shh
GO:0045426	7,6	quinone cofactor biosynthetic process	10	0.0007	1	0.0024	0.222599	E	Coq6
GO:0070301	7	cellular response to hydrogen peroxide	10	0.0007	1	0.0024	0.222599	E	Pxdn
GO:0046488	8,9	phosphatidylinositol metabolic process	10	0.0007	1	0.0024	0.222599	E	Pip5kl1
GO:0002762	8,7,6,9,10,11	negative regulation of myeloid leukocyte differentiation	10	0.0007	1	0.0024	0.222599	E	Tob2
GO:0045581	10,8,9,7,6,11,12	negative regulation of T cell differentiation	10	0.0007	1	0.0024	0.222599	E	Shh
GO:0020027	5	hemoglobin metabolic process	10	0.0007	1	0.0024	0.222599	E	Fech
GO:0006195	6,9	purine nucleotide catabolic process	10	0.0007	1	0.0024	0.222599	E	Lonp1
GO:0051445	6,5	regulation of meiotic cell cycle	10	0.0007	1	0.0024	0.222599	E	Fzr1
GO:0021930	6,7,9,10,11	granule cell precursor proliferation	10	0.0007	1	0.0024	0.222599	E	Shh
GO:0001916	7,11,12,8,10,9,5,6	positive regulation of T cell mediated cytotoxicity	10	0.0007	1	0.0024	0.222599	E	P2rx7
GO:0021924	5,6,8,9,10	cell proliferation in the external granule layer	10	0.0007	1	0.0024	0.222599	E	Shh
GO:0006144	6,7	purine base metabolic process	10	0.0007	1	0.0024	0.222599	E	Ampd3
GO:0051181	4,5	cofactor transport	10	0.0007	1	0.0024	0.222599	E	P2rx7
GO:0050714	6,7,9,8,4,5	positive regulation of protein secretion	10	0.0007	1	0.0024	0.222599	E	P2rx7
GO:0021915	4,6,7	neural tube development	91	0.0062	3	0.0071	0.223064	E	Fzd3,Shh,Rpgrip1l
GO:0051494	7,5,6	negative regulation of cytoskeleton organization	42	0.0029	2	0.0047	0.223442	E	Capg,Evl
GO:0006413	8,3,6,7	translational initiation	42	0.0029	2	0.0047	0.223442	E	Eif4e3,Fech
GO:0010975	6,9,8,5,10,7,11	regulation of neuron projection development	42	0.0029	2	0.0047	0.223442	E	Nrp1,Metrn
GO:0007605	8	sensory perception of sound	92	0.0063	3	0.0071	0.223904	E	Mtap1a,Spnb4,Dfna5
GO:0030324	5,6,7	lung development	92	0.0063	3	0.0071	0.223904	E	Shh,Timeless,Rdh10
GO:0009144	9	purine nucleoside triphosphate metabolic process	92	0.0063	3	0.0071	0.223904	E	Atp5c1,Lonp1,Atp5j2
GO:0022604	5,6,4,7	regulation of cell morphogenesis	92	0.0063	3	0.0071	0.223904	E	Cdc42ep1,Nrp1,Metrn
GO:0051247	7,6,5	positive regulation of protein metabolic process	93	0.0063	3	0.0071	0.224664	E	P2rx7,Cln6,Arpc2
GO:0051327	7,5,6	M phase of meiotic cell cycle	93	0.0063	3	0.0071	0.224664	E	Meig1,Xrn1,Fzr1
GO:0007126	8,6,7,5	meiosis	93	0.0063	3	0.0071	0.224664	E	Meig1,Xrn1,Fzr1
GO:0051321	4	meiotic cell cycle	94	0.0064	3	0.0071	0.225348	E	Meig1,Xrn1,Fzr1
GO:0030323	5,6	respiratory tube development	94	0.0064	3	0.0071	0.225348	E	Shh,Timeless,Rdh10
GO:0051046	6,5	regulation of secretion	95	0.0065	3	0.0071	0.225954	E	P2rx7,Sirt4,Ghrh
GO:0009152	10	purine ribonucleotide biosynthetic process	96	0.0065	3	0.0071	0.226484	E	Atp5c1,Atp5j2,Ampd3
GO:0009141	8	nucleoside triphosphate metabolic process	96	0.0065	3	0.0071	0.226484	E	Atp5c1,Lonp1,Atp5j2
GO:0042445	5,3	hormone metabolic process	97	0.0066	3	0.0071	0.22694	E	Srd5a1,Shh,Rdh10
GO:0008016	6,5,7	regulation of heart contraction	43	0.0029	2	0.0047	0.22756	E	Th,Gnai2
GO:0019216	6,5	regulation of lipid metabolic process	43	0.0029	2	0.0047	0.22756	E	Wdtc1,Vav2
GO:0032869	5,6,7	cellular response to insulin stimulus	43	0.0029	2	0.0047	0.22756	E	Gsk3a,Wdtc1
GO:0007568	3	aging	43	0.0029	2	0.0047	0.22756	E	Xrn1,Dnaja3
GO:0045927	5,3,4	positive regulation of growth	43	0.0029	2	0.0047	0.22756	E	Spnb4,Ghrh
GO:0033674	10,7,9	positive regulation of kinase activity	99	0.0068	3	0.0071	0.227632	E	P2rx7,Npm1,Vav2
GO:0006164	9	purine nucleotide biosynthetic process	99	0.0068	3	0.0071	0.227632	E	Atp5c1,Atp5j2,Ampd3
GO:0009260	9	ribonucleotide biosynthetic process	100	0.0068	3	0.0071	0.227871	E	Atp5c1,Atp5j2,Ampd3
GO:0007411	7,9,8,4,12,10,13,11,5	axon guidance	100	0.0068	3	0.0071	0.227871	E	Nrp1,Shh,Evl
GO:0051347	6	positive regulation of transferase activity	100	0.0068	3	0.0071	0.227871	E	P2rx7,Npm1,Vav2
GO:0050954	7	sensory perception of mechanical stimulus	101	0.0069	3	0.0071	0.228039	E	Mtap1a,Spnb4,Dfna5
GO:0050863	8,7,6	regulation of T cell activation	102	0.007	3	0.0071	0.228139	E	Cd83,Dnaja3,Shh
GO:0006575	5	cellular amino acid derivative metabolic process	102	0.007	3	0.0071	0.228139	E	Ache,Th,Adc
GO:0043583	6,7	ear development	103	0.007	3	0.0071	0.228171	E	Fzd3,Rdh10,Dfna5
GO:0006725	4	cellular aromatic compound metabolic process	103	0.007	3	0.0071	0.228171	E	Th,Gch1,Ampd3
GO:0009725	4	response to hormone stimulus	103	0.007	3	0.0071	0.228171	E	Hmgb2,Gsk3a,Wdtc1
GO:0007338	5,4	single fertilization	44	0.003	2	0.0047	0.231497	E	Trpc2,Zpbp
GO:0001649	5,6,8,4	osteoblast differentiation	44	0.003	2	0.0047	0.231497	E	Jund,Shh
GO:0001819	6,4,5	positive regulation of cytokine production	44	0.003	2	0.0047	0.231497	E	P2rx7,Cd83
GO:0008037	3	cell recognition	45	0.0031	2	0.0047	0.235253	E	Nrp1,Zpbp
GO:0050879	3	multicellular organismal movement	11	0.0008	1	0.0024	0.237772	E	Itpr1
GO:0001963	7,8	synaptic transmission, dopaminergic	11	0.0008	1	0.0024	0.237772	E	Th
GO:0008038	4	neuron recognition	11	0.0008	1	0.0024	0.237772	E	Nrp1
GO:0050881	4	musculoskeletal movement	11	0.0008	1	0.0024	0.237772	E	Itpr1
GO:0051297	7,5,6	centrosome organization	11	0.0008	1	0.0024	0.237772	E	Npm1
GO:0051238	5,4	sequestering of metal ion	11	0.0008	1	0.0024	0.237772	E	P2rx7
GO:0051208	11,6,9,5	sequestering of calcium ion	11	0.0008	1	0.0024	0.237772	E	P2rx7
GO:0045884	10,9,7,8,6	regulation of survival gene product expression	11	0.0008	1	0.0024	0.237772	E	Skp2
GO:0043409	9,10,8,7	negative regulation of MAPKKK cascade	11	0.0008	1	0.0024	0.237772	E	P2rx7
GO:0016236	7,6,8	macroautophagy	11	0.0008	1	0.0024	0.237772	E	Cln3
GO:0051283	5,6,12,13,7,8,10,11,3,4	negative regulation of sequestering of calcium ion	11	0.0008	1	0.0024	0.237772	E	P2rx7
GO:0031334	6,7,5,4	positive regulation of protein complex assembly	11	0.0008	1	0.0024	0.237772	E	Arpc2
GO:0043370	11,9,10,8,12,13,7	regulation of CD4-positive, alpha beta T cell differentiation	11	0.0008	1	0.0024	0.237772	E	Cd83
GO:0031645	6,7,4,5	negative regulation of neurological system process	11	0.0008	1	0.0024	0.237772	E	Stxbp1
GO:0050663	7,5,6,8,4	cytokine secretion	11	0.0008	1	0.0024	0.237772	E	P2rx7
GO:0032633	4	interleukin-4 production	11	0.0008	1	0.0024	0.237772	E	Cd83
GO:0033059	3	cellular pigmentation	11	0.0008	1	0.0024	0.237772	E	Cno
GO:0070231	7	T cell apoptosis	11	0.0008	1	0.0024	0.237772	E	Dnaja3
GO:0000097	7,8,6	sulfur amino acid biosynthetic process	11	0.0008	1	0.0024	0.237772	E	Cbs
GO:0051209	6,7,14,13,8,9,12,11,10,4,5	release of sequestered calcium ion into cytosol	11	0.0008	1	0.0024	0.237772	E	P2rx7
GO:0032673	6,5	regulation of interleukin-4 production	11	0.0008	1	0.0024	0.237772	E	Cd83
GO:0046887	6,7,8,5,4,9	positive regulation of hormone secretion	11	0.0008	1	0.0024	0.237772	E	Ghrh
GO:0051282	5,12,6,7,10,4	regulation of sequestering of calcium ion	11	0.0008	1	0.0024	0.237772	E	P2rx7
GO:0015893	4,5	drug transport	11	0.0008	1	0.0024	0.237772	E	Slc22a18
GO:0032613	4	interleukin-10 production	11	0.0008	1	0.0024	0.237772	E	Cd83
GO:0042423	7,8	catecholamine biosynthetic process	11	0.0008	1	0.0024	0.237772	E	Th
GO:0016339	5	calcium-dependent cell-cell adhesion	11	0.0008	1	0.0024	0.237772	E	Pcdh1
GO:0046636	10,9,8,7	negative regulation of alpha-beta T cell activation	11	0.0008	1	0.0024	0.237772	E	Shh
GO:0032273	8,9,7,6,5	positive regulation of protein polymerization	11	0.0008	1	0.0024	0.237772	E	Arpc2
GO:0006414	8,7,6	translational elongation	46	0.0031	2	0.0047	0.238827	E	Eef1g,Eef1a2
GO:0010769	6,7,5,8	regulation of cell morphogenesis involved in differentiation	46	0.0031	2	0.0047	0.238827	E	Nrp1,Metrn
GO:0048663	8,9,6,5	neuron fate commitment	46	0.0031	2	0.0047	0.238827	E	Shh,Nkx2-2
GO:0045580	9,7,8,6,10,11,5	regulation of T cell differentiation	46	0.0031	2	0.0047	0.238827	E	Cd83,Shh
GO:0007188	9,10,8	G-protein signaling, coupled to cAMP nucleotide second messenger	46	0.0031	2	0.0047	0.238827	E	Gnai2,Ghrh
GO:0045637	6,5,8,9,7,4	regulation of myeloid cell differentiation	47	0.0032	2	0.0047	0.242221	E	Nfkbia,Tob2
GO:0021510	4,6,7	spinal cord development	47	0.0032	2	0.0047	0.242221	E	Shh,Nkx2-2
GO:0030072	7,5,6,8	peptide hormone secretion	49	0.0033	2	0.0047	0.248472	E	Sirt4,Ghrh
GO:0007187	8,9,7	G-protein signaling, coupled to cyclic nucleotide second messenger	49	0.0033	2	0.0047	0.248472	E	Gnai2,Ghrh
GO:0045761	10,11,6,9,12	regulation of adenylate cyclase activity	49	0.0033	2	0.0047	0.248472	E	Gnai2,Ghrh
GO:0035282	6,5	segmentation	49	0.0033	2	0.0047	0.248472	E	Abi1,Rpgrip1l
GO:0046631	7,6	alpha-beta T cell activation	50	0.0034	2	0.0047	0.251331	E	Cd83,Shh
GO:0050884	6	neuromuscular process controlling posture	12	0.0008	1	0.0024	0.251879	E	Gch1
GO:0045685	9,8,10,6,7	regulation of glial cell differentiation	12	0.0008	1	0.0024	0.251879	E	Shh
GO:0007439	6,7	ectodermal gut development	12	0.0008	1	0.0024	0.251879	E	Shh
GO:0007340	4,6,5	acrosome reaction	12	0.0008	1	0.0024	0.251879	E	Trpc2
GO:0048567	6,8,7,9,5	ectodermal gut morphogenesis	12	0.0008	1	0.0024	0.251879	E	Shh
GO:0050821	9,5,7,8,6	protein stabilization	12	0.0008	1	0.0024	0.251879	E	Ifi30
GO:0001837	6,7,8,9,10	epithelial to mesenchymal transition	12	0.0008	1	0.0024	0.251879	E	Sox9
GO:0045669	7,9,6,5,8,10	positive regulation of osteoblast differentiation	12	0.0008	1	0.0024	0.251879	E	Jund
GO:0006270	9,7,8,6	DNA replication initiation	12	0.0008	1	0.0024	0.251879	E	Mcm6
GO:0060135	4,5	maternal process involved in female pregnancy	12	0.0008	1	0.0024	0.251879	E	Il11ra1
GO:0042375	5	quinone cofactor metabolic process	12	0.0008	1	0.0024	0.251879	E	Coq6
GO:0030238	4,5,6	male sex determination	12	0.0008	1	0.0024	0.251879	E	Sox9
GO:0002823	8,6,7	negative regulation of adaptive immune response based on somatic recombination of immune receptors built from immunoglobulin superfamily domains	12	0.0008	1	0.0024	0.251879	E	Ppp3cb
GO:0002758	9,8,10,7,5	innate immune response-activating signal transduction	12	0.0008	1	0.0024	0.251879	E	Nfkbia
GO:0031023	6,4,5	microtubule organizing center organization	12	0.0008	1	0.0024	0.251879	E	Npm1
GO:0014902	7,8,6,10,9,11	myotube differentiation	12	0.0008	1	0.0024	0.251879	E	Shh
GO:0048048	7,8,9,6	embryonic eye morphogenesis	12	0.0008	1	0.0024	0.251879	E	Th
GO:0002820	7,5,6	negative regulation of adaptive immune response	12	0.0008	1	0.0024	0.251879	E	Ppp3cb
GO:0014013	8,7,9,6	regulation of gliogenesis	12	0.0008	1	0.0024	0.251879	E	Shh
GO:0043330	5	response to exogenous dsRNA	12	0.0008	1	0.0024	0.251879	E	Nfkbia
GO:0045620	9,7,8,6,5,10,11	negative regulation of lymphocyte differentiation	12	0.0008	1	0.0024	0.251879	E	Shh
GO:0048641	7,9,8,10,6	regulation of skeletal muscle tissue development	12	0.0008	1	0.0024	0.251879	E	Shh
GO:0043624	6,5	cellular protein complex disassembly	51	0.0035	2	0.0047	0.254015	E	Capg,Evl
GO:0031279	9,10,5,8,11	regulation of cyclase activity	51	0.0035	2	0.0047	0.254015	E	Gnai2,Ghrh
GO:0031344	5,4	regulation of cell projection organization	51	0.0035	2	0.0047	0.254015	E	Nrp1,Metrn
GO:0042493	4	response to drug	51	0.0035	2	0.0047	0.254015	E	P2rx7,Slc22a18
GO:0002790	5,6	peptide secretion	51	0.0035	2	0.0047	0.254015	E	Sirt4,Ghrh
GO:0051339	5	regulation of lyase activity	51	0.0035	2	0.0047	0.254015	E	Gnai2,Ghrh
GO:0043241	5	protein complex disassembly	52	0.0035	2	0.0047	0.256526	E	Capg,Evl
GO:0032868	6	response to insulin stimulus	52	0.0035	2	0.0047	0.256526	E	Gsk3a,Wdtc1
GO:0006007	8,9	glucose catabolic process	52	0.0035	2	0.0047	0.256526	E	Rpia,Aldoc
GO:0019320	7,8	hexose catabolic process	52	0.0035	2	0.0047	0.256526	E	Rpia,Aldoc
GO:0019933	9,8	cAMP-mediated signaling	52	0.0035	2	0.0047	0.256526	E	Gnai2,Ghrh
GO:0046365	6,7	monosaccharide catabolic process	52	0.0035	2	0.0047	0.256526	E	Rpia,Aldoc
GO:0022404	4	molting cycle process	53	0.0036	2	0.0047	0.258866	E	Sox9,Shh
GO:0034623	5,4	cellular macromolecular complex disassembly	53	0.0036	2	0.0047	0.258866	E	Capg,Evl
GO:0001942	8,7,9,6	hair follicle development	53	0.0036	2	0.0047	0.258866	E	Sox9,Shh
GO:0022405	5	hair cycle process	53	0.0036	2	0.0047	0.258866	E	Sox9,Shh
GO:0060047	6	heart contraction	54	0.0037	2	0.0047	0.261037	E	Th,Gnai2
GO:0030817	9,10,8,11	regulation of cAMP biosynthetic process	54	0.0037	2	0.0047	0.261037	E	Gnai2,Ghrh
GO:0044242	5,6	cellular lipid catabolic process	54	0.0037	2	0.0047	0.261037	E	Enpp7,Phyh
GO:0003015	5	heart process	54	0.0037	2	0.0047	0.261037	E	Th,Gnai2
GO:0010639	6,4,5	negative regulation of organelle organization	54	0.0037	2	0.0047	0.261037	E	Capg,Evl
GO:0035148	4,6,5	tube lumen formation	54	0.0037	2	0.0047	0.261037	E	Fzd3,Shh
GO:0048730	7,6,8,9,5	epidermis morphogenesis	54	0.0037	2	0.0047	0.261037	E	Shh,Pphln1
GO:0006979	4	response to oxidative stress	54	0.0037	2	0.0047	0.261037	E	Idh1,Pxdn
GO:0002822	7,6	regulation of adaptive immune response based on somatic recombination of immune receptors built from immunoglobulin superfamily domains	55	0.0038	2	0.0047	0.263042	E	P2rx7,Ppp3cb
GO:0045619	8,6,7,5,9,10,4	regulation of lymphocyte differentiation	55	0.0038	2	0.0047	0.263042	E	Cd83,Shh
GO:0019935	8,7	cyclic-nucleotide-mediated signaling	55	0.0038	2	0.0047	0.263042	E	Gnai2,Ghrh
GO:0002819	6,5	regulation of adaptive immune response	55	0.0038	2	0.0047	0.263042	E	P2rx7,Ppp3cb
GO:0032870	4,5	cellular response to hormone stimulus	55	0.0038	2	0.0047	0.263042	E	Gsk3a,Wdtc1
GO:0042129	9,8,7	regulation of T cell proliferation	56	0.0038	2	0.0047	0.264883	E	Dnaja3,Shh
GO:0030814	9,10,8	regulation of cAMP metabolic process	56	0.0038	2	0.0047	0.264883	E	Gnai2,Ghrh
GO:0042303	3	molting cycle	56	0.0038	2	0.0047	0.264883	E	Sox9,Shh
GO:0007565	3,4	female pregnancy	56	0.0038	2	0.0047	0.264883	E	Ceacam9,Il11ra1
GO:0042633	4	hair cycle	56	0.0038	2	0.0047	0.264883	E	Sox9,Shh
GO:0002218	8,9,4,6,7	activation of innate immune response	13	0.0009	1	0.0024	0.26497	E	Nfkbia
GO:0002707	8,9,6,7	negative regulation of lymphocyte mediated immunity	13	0.0009	1	0.0024	0.26497	E	Ppp3cb
GO:0048284	4	organelle fusion	13	0.0009	1	0.0024	0.26497	E	Cln3
GO:0002704	7,8,5,6	negative regulation of leukocyte mediated immunity	13	0.0009	1	0.0024	0.26497	E	Ppp3cb
GO:0009127	10	purine nucleoside monophosphate biosynthetic process	13	0.0009	1	0.0024	0.26497	E	Ampd3
GO:0006687	7,8	glycosphingolipid metabolic process	13	0.0009	1	0.0024	0.26497	E	Cln6
GO:0030149	7,8	sphingolipid catabolic process	13	0.0009	1	0.0024	0.26497	E	Enpp7
GO:0001738	8,7,9,6	morphogenesis of a polarized epithelium	13	0.0009	1	0.0024	0.26497	E	Fzd3
GO:0009168	11	purine ribonucleoside monophosphate biosynthetic process	13	0.0009	1	0.0024	0.26497	E	Ampd3
GO:0051262	7,6	protein tetramerization	13	0.0009	1	0.0024	0.26497	E	Ache
GO:0021871	5,7,8,9,6	forebrain regionalization	13	0.0009	1	0.0024	0.26497	E	Shh
GO:0042755	5	eating behavior	13	0.0009	1	0.0024	0.26497	E	Th
GO:0046466	6,7	membrane lipid catabolic process	13	0.0009	1	0.0024	0.26497	E	Enpp7
GO:0002711	9,10,7,8	positive regulation of T cell mediated immunity	13	0.0009	1	0.0024	0.26497	E	P2rx7
GO:0042559	6	pteridine and derivative biosynthetic process	13	0.0009	1	0.0024	0.26497	E	Gch1
GO:0034599	5	cellular response to oxidative stress	13	0.0009	1	0.0024	0.26497	E	Pxdn
GO:0002209	4,5	behavioral defense response	13	0.0009	1	0.0024	0.26497	E	Vdac3
GO:0006760	5,7	folic acid and derivative metabolic process	13	0.0009	1	0.0024	0.26497	E	Gch1
GO:0007193	12,13,10,11,8,9,14	inhibition of adenylate cyclase activity by G-protein signaling	13	0.0009	1	0.0024	0.26497	E	Gnai2
GO:0030539	6,7,8	male genitalia development	13	0.0009	1	0.0024	0.26497	E	Shh
GO:0001662	5,6	behavioral fear response	13	0.0009	1	0.0024	0.26497	E	Vdac3
GO:0050772	7,9,8,11,10,5,6,12,13,14	positive regulation of axonogenesis	13	0.0009	1	0.0024	0.26497	E	Metrn
GO:0034620	5,6	cellular response to unfolded protein	13	0.0009	1	0.0024	0.26497	E	Ddit3
GO:0031018	4,6,7	endocrine pancreas development	13	0.0009	1	0.0024	0.26497	E	Nkx2-2
GO:0032330	6,5,8,9,7,4	regulation of chondrocyte differentiation	13	0.0009	1	0.0024	0.26497	E	Sox9
GO:0030968	8,7,6	endoplasmic reticulum unfolded protein response	13	0.0009	1	0.0024	0.26497	E	Ddit3
GO:0006405	9,8,5,7,6	RNA export from nucleus	13	0.0009	1	0.0024	0.26497	E	Npm1
GO:0032984	4	macromolecular complex disassembly	57	0.0039	2	0.0047	0.266564	E	Capg,Evl
GO:0048585	5,3,4	negative regulation of response to stimulus	57	0.0039	2	0.0047	0.266564	E	Cln3,Ppp3cb
GO:0045454	5,6,4	cell redox homeostasis	57	0.0039	2	0.0047	0.266564	E	Ddit3,Txn2
GO:0044275	5,6	cellular carbohydrate catabolic process	58	0.004	2	0.0047	0.268086	E	Rpia,Aldoc
GO:0030808	7,8,6,9	regulation of nucleotide biosynthetic process	58	0.004	2	0.0047	0.268086	E	Gnai2,Ghrh
GO:0030802	8,9,7,10	regulation of cyclic nucleotide biosynthetic process	58	0.004	2	0.0047	0.268086	E	Gnai2,Ghrh
GO:0046164	5	alcohol catabolic process	58	0.004	2	0.0047	0.268086	E	Rpia,Aldoc
GO:0006171	10	cAMP biosynthetic process	59	0.004	2	0.0047	0.269453	E	Gnai2,Ghrh
GO:0048741	6,7,9,8,10	skeletal muscle fiber development	59	0.004	2	0.0047	0.269453	E	Chrna1,Shh
GO:0031667	5	response to nutrient levels	60	0.0041	2	0.0047	0.270669	E	Cln3,Ghrh
GO:0046879	6,4,5,7	hormone secretion	60	0.0041	2	0.0047	0.270669	E	Sirt4,Ghrh
GO:0044270	5	nitrogen compound catabolic process	60	0.0041	2	0.0047	0.270669	E	Ache,Bcat2
GO:0009310	6	amine catabolic process	60	0.0041	2	0.0047	0.270669	E	Ache,Bcat2
GO:0030799	8,9,7	regulation of cyclic nucleotide metabolic process	61	0.0042	2	0.0047	0.271736	E	Gnai2,Ghrh
GO:0009914	5,4	hormone transport	61	0.0042	2	0.0047	0.271736	E	Sirt4,Ghrh
GO:0015833	4,5	peptide transport	62	0.0042	2	0.0047	0.272657	E	Sirt4,Ghrh
GO:0006140	7,8,6	regulation of nucleotide metabolic process	62	0.0042	2	0.0047	0.272657	E	Gnai2,Ghrh
GO:0043523	8,7	regulation of neuron apoptosis	62	0.0042	2	0.0047	0.272657	E	Kcnip3,Cln3
GO:0001764	6,7,8,5	neuron migration	62	0.0042	2	0.0047	0.272657	E	Ccr4,Katna1
GO:0030902	4,6,7,8	hindbrain development	63	0.0043	2	0.0047	0.273436	E	Shh,Rpgrip1l
GO:0008344	4,5	adult locomotory behavior	63	0.0043	2	0.0047	0.273436	E	Tbce,Spnb4
GO:0050870	9,8,7,6	positive regulation of T cell activation	64	0.0044	2	0.0047	0.274077	E	Cd83,Dnaja3
GO:0002706	8,6,7	regulation of lymphocyte mediated immunity	64	0.0044	2	0.0047	0.274077	E	P2rx7,Ppp3cb
GO:0046058	9	cAMP metabolic process	64	0.0044	2	0.0047	0.274077	E	Gnai2,Ghrh
GO:0035270	5	endocrine system development	65	0.0044	2	0.0047	0.274582	E	Nkx2-2,Ghrh
GO:0016049	5,3	cell growth	67	0.0046	2	0.0047	0.275201	E	Emp1,Npm1
GO:0021537	5,7,8,9,4	telencephalon development	67	0.0046	2	0.0047	0.275201	E	Shh,Rpgrip1l
GO:0051789	4	response to protein stimulus	67	0.0046	2	0.0047	0.275201	E	P2rx7,Ddit3
GO:0002703	7,5,6	regulation of leukocyte mediated immunity	68	0.0046	2	0.0047	0.275321	E	P2rx7,Ppp3cb
GO:0002683	5,3,4	negative regulation of immune system process	68	0.0046	2	0.0047	0.275321	E	Shh,Ppp3cb
GO:0006364	5,9,8,7	rRNA processing	68	0.0046	2	0.0047	0.275321	E	Rrp9,Naf1
GO:0050673	4	epithelial cell proliferation	68	0.0046	2	0.0047	0.275321	E	Sox9,Shh
GO:0016072	8,7	rRNA metabolic process	68	0.0046	2	0.0047	0.275321	E	Rrp9,Naf1
GO:0003007	6,7,5	heart morphogenesis	68	0.0046	2	0.0047	0.275321	E	Shh,Ptcd2
GO:0060401	8,9	cytosolic calcium ion transport	14	0.001	1	0.0024	0.277091	E	P2rx7
GO:0019438	5	aromatic compound biosynthetic process	14	0.001	1	0.0024	0.277091	E	Gch1
GO:0046888	6,7,8,5,4,9	negative regulation of hormone secretion	14	0.001	1	0.0024	0.277091	E	Sirt4
GO:0060402	13,11,9,10	calcium ion transport into cytosol	14	0.001	1	0.0024	0.277091	E	P2rx7
GO:0030071	8,7,10,6,9,5	regulation of mitotic metaphase/anaphase transition	14	0.001	1	0.0024	0.277091	E	Herc2
GO:0014855	5	striated muscle cell proliferation	14	0.001	1	0.0024	0.277091	E	Shh
GO:0051952	6,5	regulation of amine transport	14	0.001	1	0.0024	0.277091	E	P2rx7
GO:0030168	7,4,5,6	platelet activation	14	0.001	1	0.0024	0.277091	E	Evl
GO:0006739	9,10,8	NADP metabolic process	14	0.001	1	0.0024	0.277091	E	Rpia
GO:0031663	7,6	lipopolysaccharide-mediated signaling pathway	14	0.001	1	0.0024	0.277091	E	Nfkbia
GO:0016998	4,5	cell wall macromolecule catabolic process	15	0.001	1	0.0024	0.288288	E	Lysmd3
GO:0042558	5	pteridine and derivative metabolic process	15	0.001	1	0.0024	0.288288	E	Gch1
GO:0046677	4	response to antibiotic	15	0.001	1	0.0024	0.288288	E	Slc22a18
GO:0043331	4	response to dsRNA	15	0.001	1	0.0024	0.288288	E	Nfkbia
GO:0000060	7,9,10,6,8	protein import into nucleus, translocation	15	0.001	1	0.0024	0.288288	E	Nfkbia
GO:0055010	8,9,10,7	ventricular cardiac muscle morphogenesis	15	0.001	1	0.0024	0.288288	E	Ptcd2
GO:0009167	10	purine ribonucleoside monophosphate metabolic process	15	0.001	1	0.0024	0.288288	E	Ampd3
GO:0044036	4	cell wall macromolecule metabolic process	15	0.001	1	0.0024	0.288288	E	Lysmd3
GO:0019886	6	antigen processing and presentation of exogenous peptide antigen via MHC class II	15	0.001	1	0.0024	0.288288	E	Ifi30
GO:0007194	11,12,7,10,13	negative regulation of adenylate cyclase activity	15	0.001	1	0.0024	0.288288	E	Gnai2
GO:0000059	7,6,9,10,8	protein import into nucleus, docking	15	0.001	1	0.0024	0.288288	E	Ipo4
GO:0050830	6,7	defense response to Gram-positive bacterium	15	0.001	1	0.0024	0.288288	E	P2rx7
GO:0048010	9,8	vascular endothelial growth factor receptor signaling pathway	15	0.001	1	0.0024	0.288288	E	Nrp1
GO:0002262	7,4	myeloid cell homeostasis	15	0.001	1	0.0024	0.288288	E	Fancc
GO:0009395	6,7	phospholipid catabolic process	15	0.001	1	0.0024	0.288288	E	Enpp7
GO:0060442	8,6,9,10,7,5	branching involved in prostate gland morphogenesis	15	0.001	1	0.0024	0.288288	E	Shh
GO:0030516	8,9,11,10,7,13,12,14	regulation of axon extension	15	0.001	1	0.0024	0.288288	E	Nrp1
GO:0042306	8,9,10,7	regulation of protein import into nucleus	15	0.001	1	0.0024	0.288288	E	Shh
GO:0030261	4,5	chromosome condensation	15	0.001	1	0.0024	0.288288	E	Nusap1
GO:0031280	10,11,6,9,12	negative regulation of cyclase activity	15	0.001	1	0.0024	0.288288	E	Gnai2
GO:0002495	5	antigen processing and presentation of peptide antigen via MHC class II	15	0.001	1	0.0024	0.288288	E	Ifi30
GO:0009126	9	purine nucleoside monophosphate metabolic process	15	0.001	1	0.0024	0.288288	E	Ampd3
GO:0050771	7,9,8,11,10,5,6,12,13,14	negative regulation of axonogenesis	15	0.001	1	0.0024	0.288288	E	Nrp1
GO:0007274	6,7	neuromuscular synaptic transmission	15	0.001	1	0.0024	0.288288	E	Chrna1
GO:0051350	6	negative regulation of lyase activity	15	0.001	1	0.0024	0.288288	E	Gnai2
GO:0019217	6,7,8,5	regulation of fatty acid metabolic process	15	0.001	1	0.0024	0.288288	E	Wdtc1
GO:0006476	9,8	protein amino acid deacetylation	15	0.001	1	0.0024	0.288288	E	Sirt4
GO:0045666	7,9,8,10,6,5	positive regulation of neuron differentiation	16	0.0011	1	0.0024	0.298604	E	Nkx2-2
GO:0006446	8,9,7,4	regulation of translational initiation	16	0.0011	1	0.0024	0.298604	E	Fech
GO:0044419	3	interspecies interaction between organisms	16	0.0011	1	0.0024	0.298604	E	Mst1r
GO:0000910	4	cytokinesis	16	0.0011	1	0.0024	0.298604	E	Nusap1
GO:0001502	5,7,8,6	cartilage condensation	16	0.0011	1	0.0024	0.298604	E	Sox9
GO:0051147	6,5	regulation of muscle cell differentiation	16	0.0011	1	0.0024	0.298604	E	Shh
GO:0006342	10,9,11,8,4,7	chromatin silencing	16	0.0011	1	0.0024	0.298604	E	Sirt4
GO:0035050	6,7,5,4	embryonic heart tube development	16	0.0011	1	0.0024	0.298604	E	Foxh1
GO:0021904	6,8,9,7	dorsal/ventral neural tube patterning	16	0.0011	1	0.0024	0.298604	E	Shh
GO:0032755	7,5,6	positive regulation of interleukin-6 production	16	0.0011	1	0.0024	0.298604	E	P2rx7
GO:0042573	7,5	retinoic acid metabolic process	16	0.0011	1	0.0024	0.298604	E	Rdh10
GO:0007093	7,6	mitotic cell cycle checkpoint	16	0.0011	1	0.0024	0.298604	E	Brsk1
GO:0045453	7,5	bone resorption	16	0.0011	1	0.0024	0.298604	E	P2rx7
GO:0001782	8,5	B cell homeostasis	16	0.0011	1	0.0024	0.298604	E	Ikbkb
GO:0002698	6,7,4,5	negative regulation of immune effector process	16	0.0011	1	0.0024	0.298604	E	Ppp3cb
GO:0030330	8,7	DNA damage response, signal transduction by p53 class mediator	16	0.0011	1	0.0024	0.298604	E	Npm1
GO:0045995	5,4	regulation of embryonic development	16	0.0011	1	0.0024	0.298604	E	Shh
GO:0030048	4,7,6	actin filament-based movement	16	0.0011	1	0.0024	0.298604	E	Evl
GO:0030032	5	lamellipodium assembly	16	0.0011	1	0.0024	0.298604	E	Vav2
GO:0009112	5,6	nucleobase metabolic process	17	0.0012	1	0.0024	0.30808	E	Ampd3
GO:0045670	8,7,10,11,9,6	regulation of osteoclast differentiation	17	0.0012	1	0.0024	0.30808	E	Tob2
GO:0007091	7,9,5,8,6,4	mitotic metaphase/anaphase transition	17	0.0012	1	0.0024	0.30808	E	Herc2
GO:0009156	10	ribonucleoside monophosphate biosynthetic process	17	0.0012	1	0.0024	0.30808	E	Ampd3
GO:0042542	6	response to hydrogen peroxide	17	0.0012	1	0.0024	0.30808	E	Pxdn
GO:0044243	4	multicellular organismal catabolic process	17	0.0012	1	0.0024	0.30808	E	P2rx7
GO:0006305	8,7	DNA alkylation	17	0.0012	1	0.0024	0.30808	E	Mbd4
GO:0006801	5	superoxide metabolic process	17	0.0012	1	0.0024	0.30808	E	Fancc
GO:0006306	8,7,9	DNA methylation	17	0.0012	1	0.0024	0.30808	E	Mbd4
GO:0009262	8	deoxyribonucleotide metabolic process	17	0.0012	1	0.0024	0.30808	E	Dera
GO:0006898	6,5,7	receptor-mediated endocytosis	17	0.0012	1	0.0024	0.30808	E	Ache
GO:0007339	6,7	binding of sperm to zona pellucida	17	0.0012	1	0.0024	0.30808	E	Zpbp
GO:0048145	6,5	regulation of fibroblast proliferation	17	0.0012	1	0.0024	0.30808	E	Ifi30
GO:0006595	7	polyamine metabolic process	17	0.0012	1	0.0024	0.30808	E	Adc
GO:0050818	5,4	regulation of coagulation	17	0.0012	1	0.0024	0.30808	E	Anxa5
GO:0048144	4	fibroblast proliferation	17	0.0012	1	0.0024	0.30808	E	Ifi30
GO:0046890	6,7,5	regulation of lipid biosynthetic process	17	0.0012	1	0.0024	0.30808	E	Wdtc1
GO:0051495	7,5,6	positive regulation of cytoskeleton organization	17	0.0012	1	0.0024	0.30808	E	Arpc2
GO:0010552	11,10,12,9,8	positive regulation of specific transcription from RNA polymerase II promoter	17	0.0012	1	0.0024	0.30808	E	Hmgb2
GO:0051092	10,8,11,9	positive regulation of NF-kappaB transcription factor activity	17	0.0012	1	0.0024	0.30808	E	Ikbkb
GO:0045445	7,8,6,10,9,11	myoblast differentiation	17	0.0012	1	0.0024	0.30808	E	Shh
GO:0042402	7,6	biogenic amine catabolic process	17	0.0012	1	0.0024	0.30808	E	Ache
GO:0045732	7,8,5,6	positive regulation of protein catabolic process	17	0.0012	1	0.0024	0.30808	E	Cln6
GO:0042743	5	hydrogen peroxide metabolic process	18	0.0012	1	0.0024	0.316756	E	Pxdn
GO:0009062	6,7,8	fatty acid catabolic process	18	0.0012	1	0.0024	0.316756	E	Phyh
GO:0060350	6,8,9,5,7	endochondral bone morphogenesis	18	0.0012	1	0.0024	0.316756	E	Sox9
GO:0031345	6,4,5	negative regulation of cell projection organization	18	0.0012	1	0.0024	0.316756	E	Nrp1
GO:0060415	7,6,8,5	muscle tissue morphogenesis	18	0.0012	1	0.0024	0.316756	E	Ptcd2
GO:0055008	7,8,9,6	cardiac muscle tissue morphogenesis	18	0.0012	1	0.0024	0.316756	E	Ptcd2
GO:0043367	9,11,12,10,8	CD4-positive, alpha beta T cell differentiation	18	0.0012	1	0.0024	0.316756	E	Cd83
GO:0045814	8,6,7	negative regulation of gene expression, epigenetic	18	0.0012	1	0.0024	0.316756	E	Sirt4
GO:0030148	6,7,8	sphingolipid biosynthetic process	18	0.0012	1	0.0024	0.316756	E	P2rx7
GO:0042596	4,5	fear response	18	0.0012	1	0.0024	0.316756	E	Vdac3
GO:0043506	10,9,12,8,11,7	regulation of JUN kinase activity	18	0.0012	1	0.0024	0.316756	E	Cbs
GO:0048265	4,5	response to pain	18	0.0012	1	0.0024	0.316756	E	Kcnip3
GO:0000077	8,7	DNA damage checkpoint	18	0.0012	1	0.0024	0.316756	E	Brsk1
GO:0035036	5,6	sperm-egg recognition	18	0.0012	1	0.0024	0.316756	E	Zpbp
GO:0006541	7,8	glutamine metabolic process	18	0.0012	1	0.0024	0.316756	E	Gls2
GO:0000096	6,7,5	sulfur amino acid metabolic process	18	0.0012	1	0.0024	0.316756	E	Cbs
GO:0008306	8,6	associative learning	18	0.0012	1	0.0024	0.316756	E	Cln3
GO:0006304	7,6	DNA modification	18	0.0012	1	0.0024	0.316756	E	Mbd4
GO:0030901	4,6,7,8	midbrain development	18	0.0012	1	0.0024	0.316756	E	Shh
GO:0002504	4	antigen processing and presentation of peptide or polysaccharide antigen via MHC class II	19	0.0013	1	0.0024	0.324671	E	Ifi30
GO:0008630	11,8,7,9,10	DNA damage response, signal transduction resulting in induction of apoptosis	19	0.0013	1	0.0024	0.324671	E	Mbd4
GO:0009069	6,7	serine family amino acid metabolic process	19	0.0013	1	0.0024	0.324671	E	Cbs
GO:0048610	3,4	reproductive cellular process	19	0.0013	1	0.0024	0.324671	E	Trpc2
GO:0050708	6,8,7,5	regulation of protein secretion	19	0.0013	1	0.0024	0.324671	E	P2rx7
GO:0032663	6,5	regulation of interleukin-2 production	19	0.0013	1	0.0024	0.324671	E	Cd83
GO:0035116	8,7	embryonic hindlimb morphogenesis	19	0.0013	1	0.0024	0.324671	E	Rpgrip1l
GO:0070227	6	lymphocyte apoptosis	19	0.0013	1	0.0024	0.324671	E	Dnaja3
GO:0031069	5,8,7,9,10,4,6	hair follicle morphogenesis	19	0.0013	1	0.0024	0.324671	E	Shh
GO:0009124	9	nucleoside monophosphate biosynthetic process	19	0.0013	1	0.0024	0.324671	E	Ampd3
GO:0015914	5,6	phospholipid transport	19	0.0013	1	0.0024	0.324671	E	P2rx7
GO:0046638	11,9,10,8,7,12,13	positive regulation of alpha-beta T cell differentiation	19	0.0013	1	0.0024	0.324671	E	Cd83
GO:0033157	7,8,6	regulation of intracellular protein transport	19	0.0013	1	0.0024	0.324671	E	Shh
GO:0009161	9	ribonucleoside monophosphate metabolic process	19	0.0013	1	0.0024	0.324671	E	Ampd3
GO:0048701	7,8,9,6	embryonic cranial skeleton morphogenesis	19	0.0013	1	0.0024	0.324671	E	Rdh10
GO:0048545	5	response to steroid hormone stimulus	19	0.0013	1	0.0024	0.324671	E	Hmgb2
GO:0060444	8,7,9,10,11,6	branching involved in mammary gland duct morphogenesis	20	0.0014	1	0.0024	0.331861	E	Etv5
GO:0009267	6,5,7	cellular response to starvation	20	0.0014	1	0.0024	0.331861	E	Cln3
GO:0006664	6,7	glycolipid metabolic process	20	0.0014	1	0.0024	0.331861	E	Cln6
GO:0046467	5,6,7	membrane lipid biosynthetic process	20	0.0014	1	0.0024	0.331861	E	P2rx7
GO:0006099	8	tricarboxylic acid cycle	20	0.0014	1	0.0024	0.331861	E	Idh1
GO:0033002	4	muscle cell proliferation	20	0.0014	1	0.0024	0.331861	E	Shh
GO:0042417	7,8	dopamine metabolic process	20	0.0014	1	0.0024	0.331861	E	Th
GO:0030101	6,5	natural killer cell activation	20	0.0014	1	0.0024	0.331861	E	Il11ra1
GO:0010741	8,9,7,6	negative regulation of protein kinase cascade	20	0.0014	1	0.0024	0.331861	E	P2rx7
GO:0007212	8,7	dopamine receptor signaling pathway	20	0.0014	1	0.0024	0.331861	E	Caly
GO:0009988	4	cell-cell recognition	20	0.0014	1	0.0024	0.331861	E	Zpbp
GO:0031346	6,4,5	positive regulation of cell projection organization	20	0.0014	1	0.0024	0.331861	E	Metrn
GO:0042219	6,5	cellular amino acid derivative catabolic process	20	0.0014	1	0.0024	0.331861	E	Ache
GO:0008589	7,8,6	regulation of smoothened signaling pathway	20	0.0014	1	0.0024	0.331861	E	Rpgrip1l
GO:0048008	9,8	platelet-derived growth factor receptor signaling pathway	20	0.0014	1	0.0024	0.331861	E	Bcar1
GO:0001818	6,4,5	negative regulation of cytokine production	20	0.0014	1	0.0024	0.331861	E	Cd83
GO:0030199	5	collagen fibril organization	21	0.0014	1	0.0024	0.338361	E	Serpinh1
GO:0046356	7	acetyl-CoA catabolic process	21	0.0014	1	0.0024	0.338361	E	Idh1
GO:0070507	7,6,5	regulation of microtubule cytoskeleton organization	21	0.0014	1	0.0024	0.338361	E	Npm1
GO:0050796	7,8,9,6,10	regulation of insulin secretion	21	0.0014	1	0.0024	0.338361	E	Sirt4
GO:0009072	6,5,7	aromatic amino acid family metabolic process	21	0.0014	1	0.0024	0.338361	E	Th
GO:0045787	6,4,5	positive regulation of cell cycle	21	0.0014	1	0.0024	0.338361	E	Nusap1
GO:0016571	9,8,10,11	histone methylation	21	0.0014	1	0.0024	0.338361	E	Suv420h2
GO:0006752	6	group transfer coenzyme metabolic process	21	0.0014	1	0.0024	0.338361	E	Gch1
GO:0006885	9	regulation of pH	21	0.0014	1	0.0024	0.338361	E	Cln6
GO:0045667	6,8,5,7,9	regulation of osteoblast differentiation	21	0.0014	1	0.0024	0.338361	E	Jund
GO:0031570	7,6	DNA integrity checkpoint	21	0.0014	1	0.0024	0.338361	E	Brsk1
GO:0031647	8,4,6,7,5	regulation of protein stability	21	0.0014	1	0.0024	0.338361	E	Ifi30
GO:0030518	8,7	steroid hormone receptor signaling pathway	21	0.0014	1	0.0024	0.338361	E	Skp2
GO:0048806	5,6	genitalia development	21	0.0014	1	0.0024	0.338361	E	Shh
GO:0046822	7,8,6	regulation of nucleocytoplasmic transport	21	0.0014	1	0.0024	0.338361	E	Shh
GO:0019395	6,7,8	fatty acid oxidation	21	0.0014	1	0.0024	0.338361	E	Phyh
GO:0034440	6,7	lipid oxidation	21	0.0014	1	0.0024	0.338361	E	Phyh
GO:0032623	4	interleukin-2 production	21	0.0014	1	0.0024	0.338361	E	Cd83
GO:0006776	6	vitamin A metabolic process	22	0.0015	1	0.0024	0.344206	E	Rdh10
GO:0002053	7,5,6	positive regulation of mesenchymal cell proliferation	22	0.0015	1	0.0024	0.344206	E	Shh
GO:0031669	5,6	cellular response to nutrient levels	22	0.0015	1	0.0024	0.344206	E	Cln3
GO:0021517	5,7,8,4	ventral spinal cord development	22	0.0015	1	0.0024	0.344206	E	Shh
GO:0009123	8	nucleoside monophosphate metabolic process	22	0.0015	1	0.0024	0.344206	E	Ampd3
GO:0048873	7,6,5	homeostasis of number of cells within a tissue	22	0.0015	1	0.0024	0.344206	E	P2rx7
GO:0006094	8,9	gluconeogenesis	22	0.0015	1	0.0024	0.344206	E	Car5a
GO:0006769	8,9,7	nicotinamide metabolic process	22	0.0015	1	0.0024	0.344206	E	Rpia
GO:0030178	8,9,7,6	negative regulation of Wnt receptor signaling pathway	22	0.0015	1	0.0024	0.344206	E	Dkk1
GO:0006829	8,9	zinc ion transport	22	0.0015	1	0.0024	0.344206	E	Slc30a1
GO:0002478	5	antigen processing and presentation of exogenous peptide antigen	22	0.0015	1	0.0024	0.344206	E	Ifi30
GO:0016054	5	organic acid catabolic process	22	0.0015	1	0.0024	0.344206	E	Phyh
GO:0030316	7,9,10,8	osteoclast differentiation	22	0.0015	1	0.0024	0.344206	E	Tob2
GO:0046395	6	carboxylic acid catabolic process	22	0.0015	1	0.0024	0.344206	E	Phyh
GO:0042384	5	cilium assembly	22	0.0015	1	0.0024	0.344206	E	Rpgrip1l
GO:0010038	5	response to metal ion	22	0.0015	1	0.0024	0.344206	E	P2rx7
GO:0006749	6,5	glutathione metabolic process	22	0.0015	1	0.0024	0.344206	E	Idh1
GO:0051048	6,7,5,4	negative regulation of secretion	22	0.0015	1	0.0024	0.344206	E	Sirt4
GO:0007528	5,7,8,10,9,11	neuromuscular junction development	22	0.0015	1	0.0024	0.344206	E	Chrna1
GO:0042594	6,4	response to starvation	22	0.0015	1	0.0024	0.344206	E	Cln3
GO:0030336	7,6,5,8	negative regulation of cell migration	23	0.0016	1	0.0024	0.349428	E	Shh
GO:0048547	5,7,6,8,4	gut morphogenesis	23	0.0016	1	0.0024	0.349428	E	Shh
GO:0051168	8,7	nuclear export	23	0.0016	1	0.0024	0.349428	E	Npm1
GO:0010464	6,5	regulation of mesenchymal cell proliferation	23	0.0016	1	0.0024	0.349428	E	Shh
GO:0000302	5	response to reactive oxygen species	23	0.0016	1	0.0024	0.349428	E	Pxdn
GO:0048675	7,9,8,12,10,13,11	axon extension	23	0.0016	1	0.0024	0.349428	E	Nrp1
GO:0001912	6,7,8,4,5	positive regulation of leukocyte mediated cytotoxicity	23	0.0016	1	0.0024	0.349428	E	P2rx7
GO:0050777	6,4,5	negative regulation of immune response	23	0.0016	1	0.0024	0.349428	E	Ppp3cb
GO:0006289	8,7	nucleotide-excision repair	23	0.0016	1	0.0024	0.349428	E	Fancc
GO:0060349	5,7,8,4,6	bone morphogenesis	23	0.0016	1	0.0024	0.349428	E	Sox9
GO:0010463	4	mesenchymal cell proliferation	23	0.0016	1	0.0024	0.349428	E	Shh
GO:0000082	8,5,6,7,4	G1/S transition of mitotic cell cycle	23	0.0016	1	0.0024	0.349428	E	Skp2
GO:0031343	5,3,4	positive regulation of cell killing	23	0.0016	1	0.0024	0.349428	E	P2rx7
GO:0043193	10,9,11,8,7	positive regulation of gene-specific transcription	24	0.0016	1	0.0024	0.354058	E	Hmgb2
GO:0043112	4	receptor metabolic process	24	0.0016	1	0.0024	0.354058	E	Ache
GO:0001947	7,8,6	heart looping	24	0.0016	1	0.0024	0.354058	E	Shh
GO:0032386	6,5	regulation of intracellular transport	24	0.0016	1	0.0024	0.354058	E	Shh
GO:0009060	7	aerobic respiration	24	0.0016	1	0.0024	0.354058	E	Idh1
GO:0043161	11,10,9	proteasomal ubiquitin-dependent protein catabolic process	24	0.0016	1	0.0024	0.354058	E	Shh
GO:0010498	9,8	proteasomal protein catabolic process	24	0.0016	1	0.0024	0.354058	E	Shh
GO:0006879	10,8	cellular iron ion homeostasis	25	0.0017	1	0.0024	0.358125	E	Mfi2
GO:0042733	8,6,7,5	embryonic digit morphogenesis	25	0.0017	1	0.0024	0.358125	E	Shh
GO:0019835	4	cytolysis	25	0.0017	1	0.0024	0.358125	E	P2rx7
GO:0006090	7	pyruvate metabolic process	25	0.0017	1	0.0024	0.358125	E	Car5a
GO:0009896	6,4,5	positive regulation of catabolic process	25	0.0017	1	0.0024	0.358125	E	Cln6
GO:0046635	10,9,8,7	positive regulation of alpha-beta T cell activation	26	0.0018	1	0.0024	0.361659	E	Cd83
GO:0042130	10,9,8,7	negative regulation of T cell proliferation	26	0.0018	1	0.0024	0.361659	E	Shh
GO:0060603	7,9,8,10,6	mammary gland duct morphogenesis	26	0.0018	1	0.0024	0.361659	E	Etv5
GO:0043588	8,7,9,6	skin development	26	0.0018	1	0.0024	0.361659	E	Shh
GO:0009109	6	coenzyme catabolic process	26	0.0018	1	0.0024	0.361659	E	Idh1
GO:0019319	7,8	hexose biosynthetic process	26	0.0018	1	0.0024	0.361659	E	Car5a
GO:0055067	8	monovalent inorganic cation homeostasis	27	0.0018	1	0.0024	0.364686	E	Cln6
GO:0050873	6	brown fat cell differentiation	27	0.0018	1	0.0024	0.364686	E	Rarres2
GO:0007628	5,6	adult walking behavior	27	0.0018	1	0.0024	0.364686	E	Spnb4
GO:0006695	7,8,9	cholesterol biosynthetic process	27	0.0018	1	0.0024	0.364686	E	Hsd17b7
GO:0009612	4	response to mechanical stimulus	27	0.0018	1	0.0024	0.364686	E	P2rx7
GO:0019884	4	antigen processing and presentation of exogenous antigen	27	0.0018	1	0.0024	0.364686	E	Ifi30
GO:0006302	8,7	double-strand break repair	27	0.0018	1	0.0024	0.364686	E	Dclre1c
GO:0032675	6,5	regulation of interleukin-6 production	27	0.0018	1	0.0024	0.364686	E	P2rx7
GO:0051271	6,4,5	negative regulation of cell motion	27	0.0018	1	0.0024	0.364686	E	Shh
GO:0007613	7,5	memory	27	0.0018	1	0.0024	0.364686	E	Th
GO:0019362	7,8,6	pyridine nucleotide metabolic process	27	0.0018	1	0.0024	0.364686	E	Rpia
GO:0010927	4,5,6	cellular component assembly involved in morphogenesis	27	0.0018	1	0.0024	0.364686	E	Pmp22
GO:0021983	5,6,8,9,10,7	pituitary gland development	27	0.0018	1	0.0024	0.364686	E	Ghrh
GO:0010579	12,13,11,8,10,14	positive regulation of adenylate cyclase activity by G-protein signaling pathway	28	0.0019	1	0.0024	0.367234	E	Ghrh
GO:0048546	6,7,5	digestive tract morphogenesis	28	0.0019	1	0.0024	0.367234	E	Shh
GO:0048634	5,6,7,4	regulation of muscle development	28	0.0019	1	0.0024	0.367234	E	Shh
GO:0030203	6,7	glycosaminoglycan metabolic process	28	0.0019	1	0.0024	0.367234	E	Cln6
GO:0045089	7,8,5,6	positive regulation of innate immune response	28	0.0019	1	0.0024	0.367234	E	Nfkbia
GO:0018105	10,8,9	peptidyl-serine phosphorylation	28	0.0019	1	0.0024	0.367234	E	Brsk1
GO:0016202	6,8,7,9,5	regulation of striated muscle tissue development	28	0.0019	1	0.0024	0.367234	E	Shh
GO:0006022	5,6	aminoglycan metabolic process	28	0.0019	1	0.0024	0.367234	E	Cln6
GO:0010035	4	response to inorganic substance	28	0.0019	1	0.0024	0.367234	E	P2rx7
GO:0007189	13,14,10,12,11,9,15	activation of adenylate cyclase activity by G-protein signaling pathway	28	0.0019	1	0.0024	0.367234	E	Ghrh
GO:0046364	6,7	monosaccharide biosynthetic process	28	0.0019	1	0.0024	0.367234	E	Car5a
GO:0010578	11,12,10,7,9,13	regulation of adenylate cyclase activity involved in G-protein signaling	28	0.0019	1	0.0024	0.367234	E	Ghrh
GO:0007586	3	digestion	28	0.0019	1	0.0024	0.367234	E	P2rx7
GO:0006944	4	membrane fusion	28	0.0019	1	0.0024	0.367234	E	Cln3
GO:0031424	6,9,8,10,11,7,3	keratinization	28	0.0019	1	0.0024	0.367234	E	Pphln1
GO:0030522	7,6	intracellular receptor-mediated signaling pathway	29	0.002	1	0.0024	0.369327	E	Skp2
GO:0006775	5	fat-soluble vitamin metabolic process	29	0.002	1	0.0024	0.369327	E	Rdh10
GO:0009583	5,6	detection of light stimulus	29	0.002	1	0.0024	0.369327	E	Fech
GO:0051187	5	cofactor catabolic process	29	0.002	1	0.0024	0.369327	E	Idh1
GO:0007623	3	circadian rhythm	29	0.002	1	0.0024	0.369327	E	Timeless
GO:0001666	5,4	response to hypoxia	29	0.002	1	0.0024	0.369327	E	Itpr1
GO:0032635	4	interleukin-6 production	29	0.002	1	0.0024	0.369327	E	P2rx7
GO:0002761	7,6,9,10,8,5	regulation of myeloid leukocyte differentiation	29	0.002	1	0.0024	0.369327	E	Tob2
GO:0055123	5	digestive system development	29	0.002	1	0.0024	0.369327	E	Shh
GO:0018958	5	phenol metabolic process	30	0.002	1	0.0024	0.37099	E	Th
GO:0008286	9,8,6,7	insulin receptor signaling pathway	30	0.002	1	0.0024	0.37099	E	Gsk3a
GO:0006584	6,7	catecholamine metabolic process	30	0.002	1	0.0024	0.37099	E	Th
GO:0000075	6,5	cell cycle checkpoint	30	0.002	1	0.0024	0.37099	E	Brsk1
GO:0060113	9,10,7,5,8	inner ear receptor cell differentiation	30	0.002	1	0.0024	0.37099	E	Dfna5
GO:0070482	4	response to oxygen levels	30	0.002	1	0.0024	0.37099	E	Itpr1
GO:0007405	4,7,8	neuroblast proliferation	30	0.002	1	0.0024	0.37099	E	Shh
GO:0070667	8,6,7	negative regulation of mast cell proliferation	30	0.002	1	0.0024	0.37099	E	Shh
GO:0010212	5	response to ionizing radiation	30	0.002	1	0.0024	0.37099	E	Dclre1c
GO:0030705	6,5	cytoskeleton-dependent intracellular transport	30	0.002	1	0.0024	0.37099	E	Evl
GO:0045665	7,9,8,10,6,5	negative regulation of neuron differentiation	30	0.002	1	0.0024	0.37099	E	Nkx2-2
GO:0044272	5	sulfur compound biosynthetic process	30	0.002	1	0.0024	0.37099	E	Cbs
GO:0032886	5,4	regulation of microtubule-based process	30	0.002	1	0.0024	0.37099	E	Npm1
GO:0008629	10,8,9	induction of apoptosis by intracellular signals	31	0.0021	1	0.0024	0.372245	E	Mbd4
GO:0032945	8,6,7	negative regulation of mononuclear cell proliferation	31	0.0021	1	0.0024	0.372245	E	Shh
GO:0070664	7,5,6	negative regulation of leukocyte proliferation	31	0.0021	1	0.0024	0.372245	E	Shh
GO:0050672	9,8,7,6	negative regulation of lymphocyte proliferation	31	0.0021	1	0.0024	0.372245	E	Shh
GO:0002062	5,7,8,6	chondrocyte differentiation	31	0.0021	1	0.0024	0.372245	E	Sox9
GO:0043543	8,7	protein amino acid acylation	31	0.0021	1	0.0024	0.372245	E	Nmt1
GO:0042552	13,9,11,5,8	myelination	31	0.0021	1	0.0024	0.372245	E	Pmp22
GO:0021549	4,6,5,8,9,10	cerebellum development	31	0.0021	1	0.0024	0.372245	E	Rpgrip1l
GO:0006641	7,6,8	triglyceride metabolic process	32	0.0022	1	0.0024	0.373115	E	Apob48r
GO:0032102	6,4,5	negative regulation of response to external stimulus	32	0.0022	1	0.0024	0.373115	E	Cln3
GO:0030111	7,8,6	regulation of Wnt receptor signaling pathway	32	0.0022	1	0.0024	0.373115	E	Dkk1
GO:0035137	7,6	hindlimb morphogenesis	32	0.0022	1	0.0024	0.373115	E	Rpgrip1l
GO:0006997	4	nucleus organization	32	0.0022	1	0.0024	0.373115	E	Tssk6
GO:0045582	10,8,9,7,6,11,12	positive regulation of T cell differentiation	32	0.0022	1	0.0024	0.373115	E	Cd83
GO:0046165	5	alcohol biosynthetic process	33	0.0023	1	0.0024	0.373622	E	Car5a
GO:0002821	7,5,6	positive regulation of adaptive immune response	33	0.0023	1	0.0024	0.373622	E	P2rx7
GO:0002824	8,6,7	positive regulation of adaptive immune response based on somatic recombination of immune receptors built from immunoglobulin superfamily domains	33	0.0023	1	0.0024	0.373622	E	P2rx7
GO:0006986	4,5	response to unfolded protein	33	0.0023	1	0.0024	0.373622	E	Ddit3
GO:0042102	10,9,8,7	positive regulation of T cell proliferation	33	0.0023	1	0.0024	0.373622	E	Dnaja3
GO:0042446	6,4	hormone biosynthetic process	33	0.0023	1	0.0024	0.373622	E	Srd5a1
GO:0034097	4	response to cytokine stimulus	33	0.0023	1	0.0024	0.373622	E	Ppp3cb
GO:0006720	5,6	isoprenoid metabolic process	33	0.0023	1	0.0024	0.373622	E	Dpm2
GO:0050768	8,7,6,9	negative regulation of neurogenesis	34	0.0023	1	0.0024	0.373784	E	Nrp1
GO:0045621	9,7,8,6,5,10,11	positive regulation of lymphocyte differentiation	34	0.0023	1	0.0024	0.373784	E	Cd83
GO:0008150	1	biological_process	14659	1	425	1	1	D	Ap2s1,Gpbar1,Trip10,P2rx7,Suv420h2,Cno,Mtap1a,Ahsa1,2610002I17Rik,Lsp1,Cdca3,2900064A13Rik,Srd5a1,Meig1,Homer3,Lphn1,Polr2e,Traf5,Cdc123,Coq6,Cecr5,Nars2,Rangap1,Tpr,Ndufa13,Ctf1,Pcdh1,Papolb,L3mbtl2,Hspa12a,Sesn2,Vat1l,Blvrb,Ache,Zfp455,Gng2,Med24,Wnk1,Bccip,Rngtt,Pfn3,Hist1h2ah,Eif4e3,Fam107b,Syn3,Usp45,Gmip,Slc7a5,Cyth1,Pprc1,Prepl,Bivm,Slc34a1,Slc25a39,Ap3s2,Tha1,Ifi30,Hmgb2,Scarb2,Mfi2,Bicd1…
GO:0015986	6,13,8,7,9,10	ATP synthesis coupled proton transport	35	0.0024	1	0.0024	0.373623	D	Atp5c1
GO:0045088	6,7,5	regulation of innate immune response	35	0.0024	1	0.0024	0.373623	D	Nfkbia
GO:0009913	5,8,7,9,10,6	epidermal cell differentiation	35	0.0024	1	0.0024	0.373623	D	Pphln1
GO:0043410	9,10,8,7	positive regulation of MAPKKK cascade	35	0.0024	1	0.0024	0.373623	D	P2rx7
GO:0048565	5,6	gut development	35	0.0024	1	0.0024	0.373623	D	Shh
GO:0021536	4,5,7,8,9	diencephalon development	35	0.0024	1	0.0024	0.373623	D	Ghrh
GO:0015985	5,6,8,7,9	energy coupled proton transport, down electrochemical gradient	35	0.0024	1	0.0024	0.373623	D	Atp5c1
GO:0007190	12,13,8,11,14	activation of adenylate cyclase activity	36	0.0025	1	0.0024	0.373155	D	Ghrh
GO:0060443	6,7,8,5	mammary gland morphogenesis	36	0.0025	1	0.0024	0.373155	D	Etv5
GO:0010721	7,5,6	negative regulation of cell development	36	0.0025	1	0.0024	0.373155	D	Nrp1
GO:0042490	8,9,6	mechanoreceptor differentiation	36	0.0025	1	0.0024	0.373155	D	Dfna5
GO:0030100	5,6,7,4	regulation of endocytosis	36	0.0025	1	0.0024	0.373155	D	Rab5b
GO:0022037	5,4,7,8,9	metencephalon development	36	0.0025	1	0.0024	0.373155	D	Rpgrip1l
GO:0048002	4	antigen processing and presentation of peptide antigen	37	0.0025	1	0.0024	0.3724	D	Ifi30
GO:0051349	6	positive regulation of lyase activity	37	0.0025	1	0.0024	0.3724	D	Ghrh
GO:0030258	5,6	lipid modification	37	0.0025	1	0.0024	0.3724	D	Phyh
GO:0031281	10,11,6,9,12	positive regulation of cyclase activity	37	0.0025	1	0.0024	0.3724	D	Ghrh
GO:0018209	9,8	peptidyl-serine modification	37	0.0025	1	0.0024	0.3724	D	Brsk1
GO:0006639	6,5,7	acylglycerol metabolic process	37	0.0025	1	0.0024	0.3724	D	Apob48r
GO:0009306	6,4,5,7	protein secretion	37	0.0025	1	0.0024	0.3724	D	P2rx7
GO:0045762	11,12,7,10,13	positive regulation of adenylate cyclase activity	37	0.0025	1	0.0024	0.3724	D	Ghrh
GO:0046486	5,6	glycerolipid metabolic process	38	0.0026	1	0.0024	0.371375	D	Apob48r
GO:0007059	3	chromosome segregation	38	0.0026	1	0.0024	0.371375	D	Nusap1
GO:0034220	4,5,6	ion transmembrane transport	38	0.0026	1	0.0024	0.371375	D	Atp5c1
GO:0001756	6,7	somitogenesis	38	0.0026	1	0.0024	0.371375	D	Abi1
GO:0006638	5,6	neutral lipid metabolic process	39	0.0027	1	0.0024	0.370095	D	Apob48r
GO:0051146	6,8,9,7	striated muscle cell differentiation	39	0.0027	1	0.0024	0.370095	D	Shh
GO:0050868	9,8,7,6	negative regulation of T cell activation	39	0.0027	1	0.0024	0.370095	D	Shh
GO:0002708	8,9,6,7	positive regulation of lymphocyte mediated immunity	39	0.0027	1	0.0024	0.370095	D	P2rx7
GO:0046328	9,8,7,10,6	regulation of JNK cascade	39	0.0027	1	0.0024	0.370095	D	Cbs
GO:0009064	6,7	glutamine family amino acid metabolic process	39	0.0027	1	0.0024	0.370095	D	Gls2
GO:0002705	7,8,5,6	positive regulation of leukocyte mediated immunity	39	0.0027	1	0.0024	0.370095	D	P2rx7
GO:0050900	6,3,7,5	leukocyte migration	39	0.0027	1	0.0024	0.370095	D	Aimp1
GO:0070302	7,6,8,5	regulation of stress-activated protein kinase signaling pathway	40	0.0027	1	0.0024	0.368576	D	Cbs
GO:0045785	4,5,6	positive regulation of cell adhesion	40	0.0027	1	0.0024	0.368576	D	Cyth3
GO:0001570	5,7,8,9,6	vasculogenesis	41	0.0028	1	0.0024	0.366833	D	Shh
GO:0000187	13,9,10,8,12	activation of MAPK activity	41	0.0028	1	0.0024	0.366833	D	P2rx7
GO:0051235	4,3	maintenance of location	42	0.0029	1	0.0024	0.364881	D	P2rx7
GO:0007249	8,7	I-kappaB kinase/NF-kappaB cascade	42	0.0029	1	0.0024	0.364881	D	Ikbkb
GO:0033077	8,10,11,9,7	T cell differentiation in the thymus	42	0.0029	1	0.0024	0.364881	D	Dnaja3
GO:0030073	8,6,7,9	insulin secretion	43	0.0029	1	0.0024	0.362732	D	Sirt4
GO:0042475	7,8,6	odontogenesis of dentine-containing tooth	43	0.0029	1	0.0024	0.362732	D	Shh
GO:0016358	5,10,7,11,8,4	dendrite development	43	0.0029	1	0.0024	0.362732	D	Nrp1
GO:0043524	9,8,7,6	negative regulation of neuron apoptosis	43	0.0029	1	0.0024	0.362732	D	Cln3
GO:0006096	9,10,5	glycolysis	44	0.003	1	0.0024	0.3604	D	Aldoc
GO:0006767	5	water-soluble vitamin metabolic process	44	0.003	1	0.0024	0.3604	D	Rpia
GO:0002699	6,7,4,5	positive regulation of immune effector process	45	0.0031	1	0.0024	0.357898	D	P2rx7
GO:0032946	8,6,7	positive regulation of mononuclear cell proliferation	45	0.0031	1	0.0024	0.357898	D	Dnaja3
GO:0050671	9,8,7,6	positive regulation of lymphocyte proliferation	45	0.0031	1	0.0024	0.357898	D	Dnaja3
GO:0031349	6,7,4,5	positive regulation of defense response	46	0.0031	1	0.0024	0.355237	D	Nfkbia
GO:0008360	6,7,4,5,8	regulation of cell shape	46	0.0031	1	0.0024	0.355237	D	Cdc42ep1
GO:0032844	4,5,3	regulation of homeostatic process	46	0.0031	1	0.0024	0.355237	D	P2rx7
GO:0042476	6,7,5	odontogenesis	47	0.0032	1	0.0024	0.352428	D	Shh
GO:0051051	5,6,4,3	negative regulation of transport	47	0.0032	1	0.0024	0.352428	D	Sirt4
GO:0006909	6,5,7	phagocytosis	47	0.0032	1	0.0024	0.352428	D	P2rx7
GO:0070668	8,6,7	positive regulation of mast cell proliferation	47	0.0032	1	0.0024	0.352428	D	Dnaja3
GO:0051250	8,7,6,5	negative regulation of lymphocyte activation	47	0.0032	1	0.0024	0.352428	D	Shh
GO:0050866	6,4,5	negative regulation of cell activation	47	0.0032	1	0.0024	0.352428	D	Shh
GO:0007631	4	feeding behavior	47	0.0032	1	0.0024	0.352428	D	Th
GO:0002695	7,6,5,4	negative regulation of leukocyte activation	47	0.0032	1	0.0024	0.352428	D	Shh
GO:0070665	7,5,6	positive regulation of leukocyte proliferation	47	0.0032	1	0.0024	0.352428	D	Dnaja3
GO:0001843	7,6,9,8,10,12,11,13	neural tube closure	48	0.0033	1	0.0024	0.349482	D	Fzd3
GO:0048593	7,8,9,6	camera-type eye morphogenesis	48	0.0033	1	0.0024	0.349482	D	Th
GO:0060606	5,7,6	tube closure	48	0.0033	1	0.0024	0.349482	D	Fzd3
GO:0009063	6,7	cellular amino acid catabolic process	49	0.0033	1	0.0024	0.34641	D	Bcat2
GO:0043406	12,9,11	positive regulation of MAP kinase activity	49	0.0033	1	0.0024	0.34641	D	P2rx7
GO:0050808	4	synapse organization	50	0.0034	1	0.0024	0.343221	D	Chrna1
GO:0002757	8,7,6,4	immune response-activating signal transduction	51	0.0035	1	0.0024	0.339925	D	Nfkbia
GO:0001934	9,10,11,8,7	positive regulation of protein amino acid phosphorylation	51	0.0035	1	0.0024	0.339925	D	P2rx7
GO:0008217	4,6	regulation of blood pressure	51	0.0035	1	0.0024	0.339925	D	Gch1
GO:0014020	6,5,8,7,9,11,10,12	primary neural tube formation	51	0.0035	1	0.0024	0.339925	D	Fzd3
GO:0030183	7,9,10,8,6	B cell differentiation	52	0.0035	1	0.0024	0.336531	D	Dclre1c
GO:0001894	6,4	tissue homeostasis	52	0.0035	1	0.0024	0.336531	D	P2rx7
GO:0006119	5,7	oxidative phosphorylation	53	0.0036	1	0.0024	0.333046	D	Atp5c1
GO:0042327	9,7,8	positive regulation of phosphorylation	53	0.0036	1	0.0024	0.333046	D	P2rx7
GO:0009582	4	detection of abiotic stimulus	53	0.0036	1	0.0024	0.333046	D	Fech
GO:0010562	7,5,6	positive regulation of phosphorus metabolic process	53	0.0036	1	0.0024	0.333046	D	P2rx7
GO:0045937	8,6,7	positive regulation of phosphate metabolic process	53	0.0036	1	0.0024	0.333046	D	P2rx7
GO:0016570	8,9	histone modification	53	0.0036	1	0.0024	0.333046	D	Suv420h2
GO:0030218	7,6,8,9	erythrocyte differentiation	54	0.0037	1	0.0024	0.329479	D	Fech
GO:0045333	6	cellular respiration	54	0.0037	1	0.0024	0.329479	D	Idh1
GO:0007254	9,8,7,6	JNK cascade	54	0.0037	1	0.0024	0.329479	D	Cbs
GO:0006821	7,8	chloride transport	55	0.0038	1	0.0024	0.325838	D	Clca6
GO:0048871	5,3	multicellular organismal homeostasis	55	0.0038	1	0.0024	0.325838	D	P2rx7
GO:0007286	6,7,8,5	spermatid development	55	0.0038	1	0.0024	0.325838	D	Tssk6
GO:0002764	6,5	immune response-regulating signal transduction	55	0.0038	1	0.0024	0.325838	D	Nfkbia
GO:0009581	4	detection of external stimulus	56	0.0038	1	0.0024	0.322131	D	Fech
GO:0016569	7	covalent chromatin modification	57	0.0039	1	0.0024	0.318363	D	Suv420h2
GO:0019221	7,6	cytokine-mediated signaling pathway	57	0.0039	1	0.0024	0.318363	D	Il11ra1
GO:0007219	7,6	Notch signaling pathway	57	0.0039	1	0.0024	0.318363	D	Nfkbia
GO:0002573	6,8,9,7	myeloid leukocyte differentiation	57	0.0039	1	0.0024	0.318363	D	Tob2
GO:0031401	8,9,6,7	positive regulation of protein modification process	57	0.0039	1	0.0024	0.318363	D	P2rx7
GO:0007498	6,7,5	mesoderm development	58	0.004	1	0.0024	0.314542	D	Foxh1
GO:0060627	5,6,4	regulation of vesicle-mediated transport	58	0.004	1	0.0024	0.314542	D	Rab5b
GO:0031098	7,6,5	stress-activated protein kinase signaling pathway	58	0.004	1	0.0024	0.314542	D	Cbs
GO:0010740	8,9,7,6	positive regulation of protein kinase cascade	58	0.004	1	0.0024	0.314542	D	P2rx7
GO:0034101	6	erythrocyte homeostasis	58	0.004	1	0.0024	0.314542	D	Fech
GO:0009953	6,5	dorsal/ventral pattern formation	59	0.004	1	0.0024	0.310673	D	Shh
GO:0001841	5,7,8,10,9,11,6	neural tube formation	59	0.004	1	0.0024	0.310673	D	Fzd3
GO:0048515	5,7,6	spermatid differentiation	59	0.004	1	0.0024	0.310673	D	Tssk6
GO:0048704	6,7,8,5	embryonic skeletal system morphogenesis	59	0.004	1	0.0024	0.310673	D	Rdh10
GO:0043473	2	pigmentation	61	0.0042	1	0.0024	0.302819	D	Cno
GO:0019882	3	antigen processing and presentation	62	0.0042	1	0.0024	0.298843	D	Ifi30
GO:0001838	4,6,7,9,8,10,5	embryonic epithelial tube formation	62	0.0042	1	0.0024	0.298843	D	Fzd3
GO:0009615	4,5	response to virus	63	0.0043	1	0.0024	0.294843	D	Fv1
GO:0045444	5	fat cell differentiation	64	0.0044	1	0.0024	0.290822	D	Rarres2
GO:0007156	5	homophilic cell adhesion	64	0.0044	1	0.0024	0.290822	D	Pcdh1
GO:0042472	7,5,8,9,6,4	inner ear morphogenesis	66	0.0045	1	0.0024	0.282737	D	Fzd3
GO:0008643	4,5	carbohydrate transport	66	0.0045	1	0.0024	0.282737	D	Slc35a4
GO:0034637	5,6	cellular carbohydrate biosynthetic process	67	0.0046	1	0.0024	0.278682	D	Car5a
GO:0022411	3	cellular component disassembly	70	0.0048	2	0.0047	0.2752	D	Capg,Evl
GO:0051402	6	neuron apoptosis	70	0.0048	2	0.0047	0.2752	D	Kcnip3,Cln3
GO:0043405	11,8,10	regulation of MAP kinase activity	70	0.0048	2	0.0047	0.2752	D	P2rx7,Cbs
GO:0050804	7,8,6	regulation of synaptic transmission	68	0.0046	1	0.0024	0.274623	D	Stxbp1
GO:0043434	5	response to peptide hormone stimulus	72	0.0049	2	0.0047	0.274621	D	Gsk3a,Wdtc1
GO:0009190	9	cyclic nucleotide biosynthetic process	72	0.0049	2	0.0047	0.274621	D	Gnai2,Ghrh
GO:0040014	5,4	regulation of multicellular organism growth	72	0.0049	2	0.0047	0.274621	D	Spnb4,Ghrh
GO:0032944	7,6	regulation of mononuclear cell proliferation	72	0.0049	2	0.0047	0.274621	D	Dnaja3,Shh
GO:0050670	8,7,6	regulation of lymphocyte proliferation	72	0.0049	2	0.0047	0.274621	D	Dnaja3,Shh
GO:0006790	4	sulfur metabolic process	72	0.0049	2	0.0047	0.274621	D	Idh1,Cbs
GO:0070666	7,6	regulation of mast cell proliferation	72	0.0049	2	0.0047	0.274621	D	Dnaja3,Shh
GO:0070662	5	mast cell proliferation	72	0.0049	2	0.0047	0.274621	D	Dnaja3,Shh
GO:0043408	8,9,7	regulation of MAPKKK cascade	73	0.005	2	0.0047	0.274169	D	P2rx7,Cbs
GO:0006754	12	ATP biosynthetic process	73	0.005	2	0.0047	0.274169	D	Atp5c1,Atp5j2
GO:0016052	4,5	carbohydrate catabolic process	74	0.005	2	0.0047	0.273613	D	Rpia,Aldoc
GO:0006766	4	vitamin metabolic process	74	0.005	2	0.0047	0.273613	D	Rpia,Rdh10
GO:0070663	6,5	regulation of leukocyte proliferation	74	0.005	2	0.0047	0.273613	D	Dnaja3,Shh
GO:0007218	8,7	neuropeptide signaling pathway	75	0.0051	2	0.0047	0.272957	D	Lphn1,Nmur1
GO:0015698	6,7	inorganic anion transport	75	0.0051	2	0.0047	0.272957	D	Slc34a1,Clca6
GO:0048592	6,7,8,5	eye morphogenesis	77	0.0053	2	0.0047	0.271356	D	Fscn2,Th
GO:0043086	5	negative regulation of catalytic activity	77	0.0053	2	0.0047	0.271356	D	Cln3,Gnai2
GO:0048706	6,7	embryonic skeletal system development	78	0.0053	2	0.0047	0.270418	D	Shh,Rdh10
GO:0002697	6,4,5	regulation of immune effector process	82	0.0056	2	0.0047	0.265829	D	P2rx7,Ppp3cb
GO:0009201	10	ribonucleoside triphosphate biosynthetic process	82	0.0056	2	0.0047	0.265829	D	Atp5c1,Atp5j2
GO:0009206	11	purine ribonucleoside triphosphate biosynthetic process	82	0.0056	2	0.0047	0.265829	D	Atp5c1,Atp5j2
GO:0009145	10	purine nucleoside triphosphate biosynthetic process	83	0.0057	2	0.0047	0.264488	D	Atp5c1,Atp5j2
GO:0009142	9	nucleoside triphosphate biosynthetic process	84	0.0057	2	0.0047	0.263076	D	Atp5c1,Atp5j2
GO:0009187	8	cyclic nucleotide metabolic process	84	0.0057	2	0.0047	0.263076	D	Gnai2,Ghrh
GO:0051969	6,7,5	regulation of transmission of nerve impulse	71	0.0048	1	0.0024	0.262459	D	Stxbp1
GO:0060341	5,4	regulation of cellular localization	85	0.0058	2	0.0047	0.261596	D	P2rx7,Shh
GO:0048839	4,7,8	inner ear development	86	0.0059	2	0.0047	0.260051	D	Fzd3,Dfna5
GO:0006310	7,6	DNA recombination	86	0.0059	2	0.0047	0.260051	D	Dclre1c,Kin
GO:0007179	9,8	transforming growth factor beta receptor signaling pathway	72	0.0049	1	0.0024	0.25842	D	Foxh1
GO:0051251	8,7,6,5	positive regulation of lymphocyte activation	88	0.006	2	0.0047	0.256778	D	Cd83,Dnaja3
GO:0007519	8,7,9	skeletal muscle tissue development	89	0.0061	2	0.0047	0.255055	D	Chrna1,Shh
GO:0009416	5	response to light stimulus	89	0.0061	2	0.0047	0.255055	D	Fech,Brsk1
GO:0051270	5,4	regulation of cell motion	89	0.0061	2	0.0047	0.255055	D	Nrp1,Shh
GO:0048469	5,6,4	cell maturation	73	0.005	1	0.0024	0.254393	D	Sox8
GO:0060538	6,7	skeletal muscle organ development	90	0.0061	2	0.0047	0.253279	D	Chrna1,Shh
GO:0030534	3,4	adult behavior	91	0.0062	2	0.0047	0.251451	D	Tbce,Spnb4
GO:0030334	6,5,7,4	regulation of cell migration	74	0.005	1	0.0024	0.250382	D	Shh
GO:0002696	7,6,5,4	positive regulation of leukocyte activation	93	0.0063	2	0.0047	0.247654	D	Cd83,Dnaja3
GO:0031644	6,5	regulation of neurological system process	75	0.0051	1	0.0024	0.246388	D	Stxbp1
GO:0045860	11,8,10	positive regulation of protein kinase activity	94	0.0064	2	0.0047	0.24569	D	P2rx7,Npm1
GO:0032504	3	multicellular organism reproduction	95	0.0065	2	0.0047	0.243685	D	Trpc2,Il11ra1
GO:0007281	5,6,4	germ cell development	95	0.0065	2	0.0047	0.243685	D	Tssk6,Fancc
GO:0048609	4,3	reproductive process in a multicellular organism	95	0.0065	2	0.0047	0.243685	D	Trpc2,Il11ra1
GO:0050867	6,4,5	positive regulation of cell activation	95	0.0065	2	0.0047	0.243685	D	Cd83,Dnaja3
GO:0042471	6,7,8,5	ear morphogenesis	76	0.0052	1	0.0024	0.242415	D	Fzd3
GO:0018108	10,8,9	peptidyl-tyrosine phosphorylation	77	0.0053	1	0.0024	0.238463	D	Abi1
GO:0030879	6,7	mammary gland development	77	0.0053	1	0.0024	0.238463	D	Etv5
GO:0018212	9,8	peptidyl-tyrosine modification	77	0.0053	1	0.0024	0.238463	D	Abi1
GO:0021700	3	developmental maturation	98	0.0067	2	0.0047	0.237449	D	Sox8,Stxbp1
GO:0006869	4,5	lipid transport	98	0.0067	2	0.0047	0.237449	D	P2rx7,Apob48r
GO:0006935	4,6,5	chemotaxis	105	0.0072	3	0.0071	0.228038	D	Lsp1,Nrp2,Ccr4
GO:0042330	3,5,4	taxis	105	0.0072	3	0.0071	0.228038	D	Lsp1,Nrp2,Ccr4
GO:0035264	3	multicellular organism growth	105	0.0072	3	0.0071	0.228038	D	Wdtc1,Spnb4,Ghrh
GO:0046651	6,5	lymphocyte proliferation	107	0.0073	3	0.0071	0.22765	D	P2rx7,Dnaja3,Shh
GO:0032943	5	mononuclear cell proliferation	107	0.0073	3	0.0071	0.22765	D	P2rx7,Dnaja3,Shh
GO:0070661	4	leukocyte proliferation	109	0.0074	3	0.0071	0.227018	D	P2rx7,Dnaja3,Shh
GO:0001932	8,9,10,7	regulation of protein amino acid phosphorylation	109	0.0074	3	0.0071	0.227018	D	P2rx7,Cbs,Fech
GO:0031347	6,5	regulation of defense response	80	0.0055	1	0.0024	0.226763	D	Nfkbia
GO:0016051	4,5	carbohydrate biosynthetic process	80	0.0055	1	0.0024	0.226763	D	Car5a
GO:0051606	3	detection of stimulus	80	0.0055	1	0.0024	0.226763	D	Fech
GO:0006470	9,7,8	protein amino acid dephosphorylation	103	0.007	2	0.0047	0.226457	D	Rngtt,Ppp3cb
GO:0060249	5	anatomical structure homeostasis	114	0.0078	3	0.0071	0.224444	D	P2rx7,Dclre1c,Xrn1
GO:0001890	5,6	placenta development	81	0.0055	1	0.0024	0.22292	D	Il11ra1
GO:0051216	6,7,5	cartilage development	81	0.0055	1	0.0024	0.22292	D	Sox9
GO:0030155	4,5	regulation of cell adhesion	81	0.0055	1	0.0024	0.22292	D	Cyth3
GO:0008015	5	blood circulation	119	0.0081	3	0.0071	0.220586	D	Th,Gnai2,Gch1
GO:0003013	4	circulatory system process	119	0.0081	3	0.0071	0.220586	D	Th,Gnai2,Gch1
GO:0019932	7,6	second-messenger-mediated signaling	106	0.0072	2	0.0047	0.219592	D	Gnai2,Ghrh
GO:0042692	5	muscle cell differentiation	82	0.0056	1	0.0024	0.219109	D	Shh
GO:0009719	3	response to endogenous stimulus	121	0.0083	3	0.0071	0.218722	D	Hmgb2,Gsk3a,Wdtc1
GO:0048705	6,7,5	skeletal system morphogenesis	123	0.0084	3	0.0071	0.216692	D	P2rx7,Sox9,Rdh10
GO:0030099	5,7,8,6	myeloid cell differentiation	127	0.0087	3	0.0071	0.212174	D	Nfkbia,Fech,Tob2
GO:0016311	6	dephosphorylation	127	0.0087	3	0.0071	0.212174	D	Rngtt,Mtmr7,Ppp3cb
GO:0031399	7,8,6	regulation of protein modification process	129	0.0088	3	0.0071	0.209708	D	P2rx7,Cbs,Fech
GO:0006816	7,8	calcium ion transport	129	0.0088	3	0.0071	0.209708	D	P2rx7,Trpc2,Itpr1
GO:0032101	5,4	regulation of response to external stimulus	85	0.0058	1	0.0024	0.207876	D	Cln3
GO:0051249	7,6,5	regulation of lymphocyte activation	132	0.009	3	0.0071	0.205777	D	Cd83,Dnaja3,Shh
GO:0006633	7,6,8,5	fatty acid biosynthetic process	86	0.0059	1	0.0024	0.204202	D	Wdtc1
GO:0010627	7,8,6	regulation of protein kinase cascade	113	0.0077	2	0.0047	0.203108	D	P2rx7,Cbs
GO:0001817	5,4	regulation of cytokine production	114	0.0078	2	0.0047	0.200723	D	P2rx7,Cd83
GO:0009968	7,6,5	negative regulation of signal transduction	138	0.0094	4	0.0094	0.199197	D	P2rx7,Nfkbia,Dkk1,Ddit4
GO:0045859	10,7,9	regulation of protein kinase activity	141	0.0096	4	0.0094	0.198937	D	P2rx7,Bccip,Cbs,Npm1
GO:0045165	5,4	cell fate commitment	144	0.0098	4	0.0094	0.198307	D	Sox8,Sox9,Shh,Nkx2-2
GO:0040012	4,3	regulation of locomotion	88	0.006	1	0.0024	0.196969	D	Shh
GO:0002694	6,5,4	regulation of leukocyte activation	140	0.0096	3	0.0071	0.19417	D	Cd83,Dnaja3,Shh
GO:0002253	7,3,5,6	activation of immune response	89	0.0061	1	0.0024	0.19341	D	Nfkbia
GO:0050865	5,4	regulation of cell activation	142	0.0097	3	0.0071	0.191062	D	Cd83,Dnaja3,Shh
GO:0030900	4,6,7,8	forebrain development	158	0.0108	4	0.0094	0.191032	D	Dkk1,Shh,Rpgrip1l,Ghrh
GO:0002250	4	adaptive immune response	120	0.0082	2	0.0047	0.18639	D	P2rx7,Ppp3cb
GO:0002460	5	adaptive immune response based on somatic recombination of immune receptors built from immunoglobulin superfamily domains	120	0.0082	2	0.0047	0.18639	D	P2rx7,Ppp3cb
GO:0009952	6,5	anterior/posterior pattern formation	147	0.01	3	0.0071	0.183024	D	Foxh1,Abi1,Shh
GO:0016053	5	organic acid biosynthetic process	93	0.0063	1	0.0024	0.179582	D	Wdtc1
GO:0046394	6	carboxylic acid biosynthetic process	93	0.0063	1	0.0024	0.179582	D	Wdtc1
GO:0042110	6,5	T cell activation	178	0.0121	5	0.0118	0.178569	D	P2rx7,Cd83,Dnaja3,Shh,Ppp3cb
GO:0022603	5,4	regulation of anatomical structure morphogenesis	180	0.0123	5	0.0118	0.178147	D	Cdc42ep1,Nrp1,Shh,Metrn,Etv5
GO:0048732	5,6	gland development	182	0.0124	5	0.0118	0.177612	D	Nrp1,Sox9,Shh,Etv5,Ghrh
GO:0002449	5,6	lymphocyte mediated immunity	124	0.0085	2	0.0047	0.176899	D	P2rx7,Ppp3cb
GO:0009967	7,6,5	positive regulation of signal transduction	124	0.0085	2	0.0047	0.176899	D	P2rx7,Skp2
GO:0003012	4	muscle system process	94	0.0064	1	0.0024	0.17623	D	Tbce
GO:0007178	8,7	transmembrane receptor protein serine/threonine kinase signaling pathway	95	0.0065	1	0.0024	0.17292	D	Foxh1
GO:0044057	5,4	regulation of system process	154	0.0105	3	0.0071	0.171314	D	Stxbp1,Th,Gnai2
GO:0015980	5	energy derivation by oxidation of organic compounds	96	0.0065	1	0.0024	0.169653	D	Idh1
GO:0018193	8,7	peptidyl-amino acid modification	155	0.0106	3	0.0071	0.169613	D	Nmt1,Abi1,Brsk1
GO:0009628	3	response to abiotic stimulus	200	0.0136	5	0.0118	0.168331	D	P2rx7,Mbd4,Dclre1c,Fech,Brsk1
GO:0030198	4	extracellular matrix organization	97	0.0066	1	0.0024	0.166429	D	Serpinh1
GO:0012502	8,6,7	induction of programmed cell death	157	0.0107	3	0.0071	0.166197	D	P2rx7,Mbd4,Ppp3cb
GO:0006917	9,7,8	induction of apoptosis	157	0.0107	3	0.0071	0.166197	D	P2rx7,Mbd4,Ppp3cb
GO:0050778	6,4,5	positive regulation of immune response	129	0.0088	2	0.0047	0.165218	D	P2rx7,Nfkbia
GO:0009165	8	nucleotide biosynthetic process	207	0.0141	5	0.0118	0.162921	D	Atp5c1,Gnai2,Atp5j2,Ampd3,Ghrh
GO:0000122	10,9,11,8,7	negative regulation of transcription from RNA polymerase II promoter	208	0.0142	5	0.0118	0.162082	D	Foxh1,Zfpm1,Kcnip3,Wdtc1,Timeless
GO:0044093	4	positive regulation of molecular function	226	0.0154	6	0.0141	0.159909	D	P2rx7,Shh,Npm1,Vav2,Ikbkb,Ghrh
GO:0006814	7,8	sodium ion transport	132	0.009	2	0.0047	0.158346	D	Slc34a1,Slc4a8
GO:0042325	8,7	regulation of phosphorylation	231	0.0158	6	0.0141	0.157596	D	P2rx7,Bccip,Cbs,Fech,Npm1,Vav2
GO:0016568	6	chromatin modification	215	0.0147	5	0.0118	0.155818	D	Suv420h2,L3mbtl2,Smyd3,Smarcal1,H2afy2
GO:0051174	6,5	regulation of phosphorus metabolic process	237	0.0162	6	0.0141	0.15427	D	P2rx7,Bccip,Cbs,Fech,Npm1,Vav2
GO:0019220	7,6	regulation of phosphate metabolic process	237	0.0162	6	0.0141	0.15427	D	P2rx7,Bccip,Cbs,Fech,Npm1,Vav2
GO:0002684	5,3,4	positive regulation of immune system process	192	0.0131	4	0.0094	0.153851	D	P2rx7,Cd83,Nfkbia,Dnaja3
GO:0046903	4,5	secretion	248	0.0169	7	0.0165	0.152006	D	P2rx7,Syn3,Stxbp1,Exoc4,Stx4a,Sirt4,Ghrh
GO:0043085	5	positive regulation of catalytic activity	194	0.0132	4	0.0094	0.151213	D	P2rx7,Npm1,Vav2,Ghrh
GO:0006091	4	generation of precursor metabolites and energy	261	0.0178	7	0.0165	0.148866	D	Ndufa13,Idh1,Ndufs2,Ndufb5,Aldoc,Atp5c1,Txn2
GO:0046649	5,4	lymphocyte activation	264	0.018	7	0.0165	0.147759	D	P2rx7,Dclre1c,Cd83,Dnaja3,Shh,Ppp3cb,Il11ra1
GO:0010647	6,4,5	positive regulation of cell communication	137	0.0093	2	0.0047	0.147178	D	P2rx7,Skp2
GO:0002443	4,5	leukocyte mediated immunity	137	0.0093	2	0.0047	0.147178	D	P2rx7,Ppp3cb
GO:0032787	6	monocarboxylic acid metabolic process	248	0.0169	6	0.0141	0.146839	D	Idh1,Phyh,Wdtc1,Car5a,Acsf3,Gch1
GO:0019236	4	response to pheromone	105	0.0072	1	0.0024	0.142219	D	Trpc2
GO:0016055	7,6	Wnt receptor signaling pathway	140	0.0096	2	0.0047	0.140673	D	Fzd3,Dkk1
GO:0048583	4,3	regulation of response to stimulus	282	0.0192	7	0.0165	0.138616	D	P2rx7,Nfkbia,Cbs,Fech,Cln3,Npm1,Ppp3cb
GO:0001775	3	cell activation	308	0.021	8	0.0188	0.135462	D	P2rx7,Dclre1c,Cd83,Dnaja3,Shh,Ppp3cb,Evl,Il11ra1
GO:0002682	4,3	regulation of immune system process	287	0.0196	7	0.0165	0.135437	D	P2rx7,Cd83,Nfkbia,Dnaja3,Shh,Ppp3cb,Tob2
GO:0048729	6,5,7,4	tissue morphogenesis	311	0.0212	9	0.0212	0.135139	D	Nrp1,Fzd3,Sox9,Shh,Timeless,Ptcd2,Rdh10,Etv5,Pphln1
GO:0048870	4,5,3	cell motility	313	0.0214	9	0.0212	0.135085	D	Fmnl1,Nrp1,Nrp2,Ccr4,Katna1,Aimp1,Shh,Vav2,Bcar1
GO:0045321	4,3	leukocyte activation	290	0.0198	7	0.0165	0.133421	D	P2rx7,Dclre1c,Cd83,Dnaja3,Shh,Ppp3cb,Il11ra1
GO:0001816	3	cytokine production	144	0.0098	2	0.0047	0.13225	D	P2rx7,Cd83
GO:0050776	5,4	regulation of immune response	177	0.0121	3	0.0071	0.132165	D	P2rx7,Nfkbia,Ppp3cb
GO:0014706	7,8,6	striated muscle tissue development	145	0.0099	2	0.0047	0.130192	D	Chrna1,Shh
GO:0043062	3	extracellular structure organization	145	0.0099	2	0.0047	0.130192	D	Chrna1,Serpinh1
GO:0040007	2	growth	339	0.0231	9	0.0212	0.129969	D	Emp1,Wdtc1,Sox9,Shh,Tbce,Npm1,Rdh10,Spnb4,Ghrh
GO:0051704	2	multi-organism process	323	0.022	8	0.0188	0.127851	D	P2rx7,Trpc2,Nfkbia,Mst1r,Th,Ceacam9,Il11ra1,Fv1
GO:0003002	5,4	regionalization	212	0.0145	4	0.0094	0.127012	D	Foxh1,Abi1,Shh,Rpgrip1l
GO:0045893	9,8,10,7,6	positive regulation of transcription, DNA-dependent	361	0.0246	10	0.0235	0.12698	D	Hmgb2,Foxh1,Sox8,Snw1,Npas4,Sox9,Ablim2,Shh,Nkx2-2,Tef
GO:0051254	8,7,6,5	positive regulation of RNA metabolic process	362	0.0247	10	0.0235	0.126797	D	Hmgb2,Foxh1,Sox8,Snw1,Npas4,Sox9,Ablim2,Shh,Nkx2-2,Tef
GO:0042742	5,6	defense response to bacterium	111	0.0076	1	0.0024	0.125903	D	P2rx7
GO:0000165	8,7	MAPKKK cascade	148	0.0101	2	0.0047	0.124135	D	P2rx7,Cbs
GO:0001525	4,6,7,8,9,5	angiogenesis	148	0.0101	2	0.0047	0.124135	D	Nrp1,Shh
GO:0007610	3	behavior	384	0.0262	11	0.0259	0.12262	D	Lsp1,Trpc2,Cln6,Kcnip3,Nrp2,Ccr4,Vdac3,Cln3,Th,Tbce,Spnb4
GO:0032879	4,3	regulation of localization	307	0.0209	7	0.0165	0.120807	D	P2rx7,Nrp1,Rab5b,Gapvd1,Sirt4,Shh,Ghrh
GO:0007169	8,7	transmembrane receptor protein tyrosine kinase signaling pathway	184	0.0126	3	0.0071	0.120784	D	Nrp1,Gsk3a,Bcar1
GO:0040011	2	locomotion	400	0.0273	11	0.0259	0.120641	D	Lsp1,Cln6,Fmnl1,Nrp1,Nrp2,Ccr4,Katna1,Aimp1,Shh,Vav2,Bcar1
GO:0044262	4,5	cellular carbohydrate metabolic process	308	0.021	7	0.0165	0.120016	D	Cln6,Idh1,Rpia,Aldoc,Wdtc1,Car5a,Acly
GO:0007389	4,3	pattern specification process	280	0.0191	6	0.0141	0.119019	D	Foxh1,Nrp1,Fto,Abi1,Shh,Rpgrip1l
GO:0042113	6,5	B cell activation	114	0.0078	1	0.0024	0.118326	D	Dclre1c
GO:0065009	3	regulation of molecular function	421	0.0287	12	0.0282	0.117489	D	P2rx7,Bccip,Nfkbia,Cbs,Dnaja3,Cln3,Shh,Gnai2,Npm1,Vav2,Ikbkb,Ghrh
GO:0006631	5,7,6	fatty acid metabolic process	188	0.0128	3	0.0071	0.114493	D	Phyh,Wdtc1,Acsf3
GO:0010557	7,5,6	positive regulation of macromolecule biosynthetic process	448	0.0306	12	0.0282	0.112887	D	Hmgb2,Foxh1,Sox8,Gtf2f1,Snw1,Npas4,Sox9,Ablim2,Shh,Nkx2-2,Tef,Etv5
GO:0060537	6,7,5	muscle tissue development	154	0.0105	2	0.0047	0.112571	D	Chrna1,Shh
GO:0016337	4	cell-cell adhesion	154	0.0105	2	0.0047	0.112571	D	Pcdh1,Sox9
GO:0009617	4,5	response to bacterium	154	0.0105	2	0.0047	0.112571	D	P2rx7,Nfkbia
GO:0051674	3	localization of cell	403	0.0275	10	0.0235	0.112048	D	Fmnl1,Nrp1,Nrp2,Ccr4,Katna1,Aimp1,Shh,Vav2,Evl,Bcar1
GO:0006928	3,4	cell motion	403	0.0275	10	0.0235	0.112048	D	Fmnl1,Nrp1,Nrp2,Ccr4,Katna1,Aimp1,Shh,Vav2,Evl,Bcar1
GO:0051094	5,3,4	positive regulation of developmental process	377	0.0257	9	0.0212	0.111346	D	P2rx7,Mbd4,Jund,Cd83,Shh,Nkx2-2,Metrn,Ppp3cb,Tob2
GO:0010941	5,4	regulation of cell death	485	0.0331	14	0.0329	0.109353	D	P2rx7,Traf5,Mbd4,Kcnip3,Bag3,Ddit3,Dad1,Apbb3,Tmbim6,Sox9,Cln3,Skp2,Ppp3cb,Eef1a2
GO:0042127	5,4	regulation of cell proliferation	442	0.0302	11	0.0259	0.106177	D	Traf5,Ifi30,Nfkbia,Dnaja3,Sox9,Shh,Mdm4,Npm1,Sparc,Ghrh,Il11ra1
GO:0010604	6,4,5	positive regulation of macromolecule metabolic process	529	0.0361	15	0.0353	0.105383	D	P2rx7,Hmgb2,Cln6,Foxh1,Sox8,Gtf2f1,Snw1,Npas4,Sox9,Ablim2,Shh,Nkx2-2,Arpc2,Tef,Etv5
GO:0022414	3,2	reproductive process	543	0.037	15	0.0353	0.103772	D	Srd5a1,Hmgb2,Trpc2,Zpbp,Tssk6,Sox9,Th,Shh,Herc2,Ceacam9,Rdh10,Spnb4,Il11ra1,Fancc,Cldn11
GO:0048584	5,3,4	positive regulation of response to stimulus	159	0.0108	2	0.0047	0.103512	D	P2rx7,Nfkbia
GO:0000003	2	reproduction	546	0.0372	15	0.0353	0.103285	D	Srd5a1,Hmgb2,Trpc2,Zpbp,Tssk6,Sox9,Th,Shh,Herc2,Ceacam9,Rdh10,Spnb4,Il11ra1,Fancc,Cldn11
GO:0019953	3	sexual reproduction	360	0.0246	8	0.0188	0.102917	D	Hmgb2,Trpc2,Zpbp,Tssk6,Herc2,Spnb4,Fancc,Cldn11
GO:0050790	4	regulation of catalytic activity	360	0.0246	8	0.0188	0.102917	D	P2rx7,Bccip,Cbs,Cln3,Gnai2,Npm1,Vav2,Ghrh
GO:0015672	6,7	monovalent inorganic cation transport	297	0.0203	6	0.0141	0.102825	D	Slc34a1,Kcnip3,Atp5c1,Atp5j2,Slc36a1,Slc4a8
GO:0006357	9,8,10,7	regulation of transcription from RNA polymerase II promoter	552	0.0377	15	0.0353	0.10217	D	Hmgb2,Foxh1,Zfpm1,Sox8,Kcnip3,Tcea2,Snw1,Npas4,Wdtc1,Sox9,Ablim2,Shh,Nkx2-2,Tef,Timeless
GO:0045087	4,5	innate immune response	122	0.0083	1	0.0024	0.0999362	D	Nfkbia
GO:0009607	3	response to biotic stimulus	270	0.0184	5	0.0118	0.0966527	D	P2rx7,Nfkbia,Ddit3,Ccdc47,Fv1
GO:0055114	3	oxidation reduction	635	0.0433	18	0.0424	0.0965506	D	Srd5a1,Coq6,Ndufa13,Vat1l,Blvrb,Plod3,Idh1,Hsd17b7,Ndufs2,Phyh,Ndufb5,Pxdn,Th,Hnrpll,Txn2,Hsd17b14,Rdh10,Aldh2
GO:0007283	6,5	spermatogenesis	238	0.0162	4	0.0094	0.0937418	D	Hmgb2,Tssk6,Herc2,Cldn11
GO:0048232	5,4	male gamete generation	238	0.0162	4	0.0094	0.0937418	D	Hmgb2,Tssk6,Herc2,Cldn11
GO:0009611	4	response to wounding	341	0.0233	7	0.0165	0.0927793	D	P2rx7,Dtnbp1,Ccr4,Anxa5,Shh,F7,Evl
GO:0006812	5,6	cation transport	499	0.034	12	0.0282	0.0926312	D	P2rx7,Slc34a1,Mfi2,Trpc2,Slc30a1,Kcnip3,Itpr1,Atp5c1,Atp5j2,Sfxn2,Slc36a1,Slc4a8
GO:0051239	4,3	regulation of multicellular organismal process	666	0.0454	18	0.0424	0.0923397	D	P2rx7,Jund,Cd83,Nrp1,Smurf1,Nfkbia,Stxbp1,Anxa5,Sox9,Th,Shh,Nkx2-2,Gnai2,Metrn,Spnb4,Tob2,Etv5,Ghrh
GO:0008283	3	cell proliferation	622	0.0424	16	0.0376	0.0901754	D	P2rx7,Traf5,Gng2,Ifi30,Nfkbia,Dnaja3,Sox9,Shh,Mdm4,Gnai2,Npm1,Sparc,Ghrh,Il11ra1,Purb,Appl2
GO:0008285	6,4,5	negative regulation of cell proliferation	173	0.0118	2	0.0047	0.0809879	D	Ifi30,Shh
GO:0043065	8,6,7	positive regulation of apoptosis	213	0.0145	3	0.0071	0.0795547	D	P2rx7,Mbd4,Ppp3cb
GO:0048598	5,4	embryonic morphogenesis	358	0.0244	7	0.0165	0.0790251	D	Fzd3,Fto,Dkk1,Th,Shh,Rpgrip1l,Rdh10
GO:0002252	3,4	immune effector process	175	0.0119	2	0.0047	0.0781072	D	P2rx7,Ppp3cb
GO:0043068	7,5,6	positive regulation of programmed cell death	215	0.0147	3	0.0071	0.0771166	D	P2rx7,Mbd4,Ppp3cb
GO:0007420	5,6,7	brain development	253	0.0173	4	0.0094	0.0768524	D	Dkk1,Shh,Rpgrip1l,Ghrh
GO:0030001	6,7	metal ion transport	431	0.0294	9	0.0212	0.0759654	D	P2rx7,Slc34a1,Mfi2,Trpc2,Slc30a1,Kcnip3,Itpr1,Sfxn2,Slc4a8
GO:0010942	6,4,5	positive regulation of cell death	216	0.0147	3	0.0071	0.0759179	D	P2rx7,Mbd4,Ppp3cb
GO:0042221	3	response to chemical stimulus	695	0.0474	17	0.04	0.0752013	D	P2rx7,Lsp1,Hmgb2,Trpc2,Idh1,Cd83,Nrp2,Gsk3a,Itpr1,Nfkbia,Ddit3,Slc22a18,Ccr4,Pxdn,Anxa5,Wdtc1,Ppp3cb
GO:0009888	5,6,4	tissue development	637	0.0435	15	0.0353	0.0726855	D	P2rx7,Foxh1,Nrp1,Fzd3,Nrp2,Chrna1,Sox9,Shh,Timeless,Ptcd2,Rdh10,Etv5,Pphln1,Il11ra1,Cst6
GO:0005975	4	carbohydrate metabolic process	402	0.0274	8	0.0188	0.0722456	D	Cln6,Idh1,Rpia,Aldoc,Wdtc1,AI464131,Car5a,Acly
GO:0048522	5,3,4	positive regulation of cellular process	1069	0.0729	29	0.0682	0.0721579	D	P2rx7,Traf5,Hmgb2,Cln6,Mbd4,Foxh1,Jund,Cd83,Sox8,Nusap1,Gtf2f1,Snw1,Npas4,Dnaja3,Cyth3,Sox9,Ablim2,Shh,Nkx2-2,Mdm4,Skp2,Arpc2,Tef,Metrn,Npm1,Ppp3cb,Etv5,Ghrh,Il11ra1
GO:0051707	3,4	response to other organism	220	0.015	3	0.0071	0.0712594	D	P2rx7,Nfkbia,Fv1
GO:0043412	5	biopolymer modification	1238	0.0845	34	0.08	0.0681582	D	P2rx7,Suv420h2,Wnk1,Rngtt,Dpm2,Ube4b,Mbd4,Gtpbp3,Aurkb,Nmt1,Gsk3a,Smurf1,Mst1r,Pigv,Cbs,Tssk6,Ube2s,Abi1,Sirt4,Ttll5,Sik1,Fech,Rpusd1,Ube2q1,Araf,Skp2,Gspt1,Cdc42bpg,Herc2,Ppp3cb,Ikbkb,Brsk1,Prkcz,Qtrt1
GO:0043687	8,7	post-translational protein modification	1006	0.0686	26	0.0612	0.0670027	D	P2rx7,Suv420h2,Wnk1,Rngtt,Ube4b,Aurkb,Gsk3a,Smurf1,Mst1r,Cbs,Tssk6,Ube2s,Abi1,Sirt4,Sik1,Fech,Ube2q1,Araf,Skp2,Gspt1,Cdc42bpg,Herc2,Ppp3cb,Ikbkb,Brsk1,Prkcz
GO:0007243	7,6	protein kinase cascade	263	0.0179	4	0.0094	0.0667642	D	P2rx7,Cbs,Sik1,Ikbkb
GO:0048518	4,2,3	positive regulation of biological process	1212	0.0827	32	0.0753	0.0630699	D	P2rx7,Traf5,Hmgb2,Cln6,Mbd4,Foxh1,Jund,Cd83,Sox8,Nusap1,Gtf2f1,Nfkbia,Snw1,Npas4,Dnaja3,Cyth3,Sox9,Ablim2,Shh,Nkx2-2,Mdm4,Skp2,Arpc2,Tef,Metrn,Npm1,Ppp3cb,Spnb4,Tob2,Etv5,Ghrh,Il11ra1
GO:0048869	3	cellular developmental process	1611	0.1099	45	0.1059	0.0613956	D	P2rx7,Srd5a1,Ctf1,Slc7a5,Cdc42ep1,Dclre1c,Jund,Cd83,Sox8,Nrp1,Nrp2,Nfkbia,Chrna1,Ccr4,Katna1,Eif2c2,Stxbp1,Tssk6,Fscn2,Dnaja3,Sik1,Sox9,Nphp3,Fech,Th,Shh,Nkx2-2,Myt1,Tbce,Metrn,Unc45a,Ptcd2,Ppp3cb,Brsk1,Rdh10,Spnb4,Tob2,Evl,Pmp22,Pphln1,Dfna5,Il11ra1,Purb,Fancc,Rarres2
GO:0030154	4	cell differentiation	1535	0.1047	42	0.0988	0.0604393	D	Srd5a1,Ctf1,Slc7a5,Dclre1c,Jund,Cd83,Sox8,Nrp1,Nrp2,Nfkbia,Chrna1,Ccr4,Katna1,Eif2c2,Stxbp1,Tssk6,Fscn2,Dnaja3,Sik1,Sox9,Nphp3,Fech,Th,Shh,Nkx2-2,Myt1,Tbce,Metrn,Unc45a,Ptcd2,Ppp3cb,Brsk1,Rdh10,Spnb4,Tob2,Evl,Pphln1,Dfna5,Il11ra1,Purb,Fancc,Rarres2
GO:0007276	4,3	gamete generation	309	0.0211	5	0.0118	0.0599541	D	Hmgb2,Tssk6,Herc2,Fancc,Cldn11
GO:0009605	3	response to external stimulus	565	0.0385	12	0.0282	0.0589531	D	P2rx7,Lsp1,Dtnbp1,Nrp2,Ccr4,Anxa5,Fech,Cln3,Shh,F7,Evl,Ghrh
GO:0048731	4	system development	1989	0.1357	57	0.1341	0.0572696	D	P2rx7,Ctf1,Ache,Slc7a5,Hmgb2,Foxh1,Dtnbp1,Dclre1c,Zfpm1,Jund,Cd83,Sox8,Nrp1,Utrn,Fzd3,Nrp2,Smurf1,Nfkbia,Chrna1,Ccr4,Katna1,Wdr5,Stxbp1,Fscn2,Dnaja3,Hexim1,Dkk1,Sox9,Nphp3,Fech,Th,Shh,Nkx2-2,Myt1,Tbce,Klf11,Metrn,Rpgrip1l,Unc45a,Prph2,Timeless,Ptcd2,Ppp3cb,Brsk1,Rdh10,Spnb4,Tob2,Acp2,Evl,Pmp22,Etv5,Pphln1,Ghrh,Dfna5,Il11ra1,Cst6,Cldn11
GO:0006468	9,7,8	protein amino acid phosphorylation	674	0.046	15	0.0353	0.0569855	D	P2rx7,Wnk1,Aurkb,Gsk3a,Mst1r,Cbs,Tssk6,Abi1,Sik1,Fech,Araf,Cdc42bpg,Ikbkb,Brsk1,Prkcz
GO:0051252	7,6,5	regulation of RNA metabolic process	1782	0.1216	49	0.1153	0.056528	D	Suv420h2,L3mbtl2,Med24,Pprc1,Hmgb2,Foxh1,Zfpm1,Jund,Sox8,Hinfp,Kcnip3,Tcea2,Gtf2f1,Ddit3,Snw1,Ssbp2,Eif2c2,Arid3b,Sap30l,Npas4,Klf3,Wdtc1,Sirt4,Sox12,Hexim1,Sox9,Ablim2,Shh,Nkx2-2,Zscan20,Myt1,Klf11,Tef,Sp2,Bdp1,Npm1,Zfp354c,Btf3,Leo1,Timeless,Ptcd2,Hr,E2f2,Mcm6,Zfp524,Etv5,Purb,Ascc1,Fiz1
GO:0016310	6	phosphorylation	816	0.0557	19	0.0447	0.0553483	D	P2rx7,Wnk1,Bccip,Aurkb,Gsk3a,Mst1r,Atp5c1,Cbs,Tssk6,Abi1,Sik1,Fech,Araf,Cdc42bpg,Npm1,Vav2,Ikbkb,Brsk1,Prkcz
GO:0019219	6,5	regulation of nucleobase, nucleoside, nucleotide and nucleic acid metabolic process	1948	0.1329	54	0.1271	0.0551211	D	Suv420h2,L3mbtl2,Med24,Pprc1,Hmgb2,Foxh1,Zfpm1,Jund,Sox8,Hinfp,Kcnip3,Tcea2,Gtf2f1,Nfkbia,Ddit3,Snw1,Ssbp2,Eif2c2,Arid3b,Sap30l,Npas4,Klf3,Wdtc1,Dnaja3,Sirt4,Sox12,Hexim1,Sox9,Ablim2,Shh,Nkx2-2,Zscan20,Myt1,Klf11,Tef,Gnai2,Sp2,Bdp1,Npm1,Zfp354c,Btf3,Leo1,Timeless,Ptcd2,Hr,Ikbkb,E2f2,Mcm6,Zfp524,Etv5,Ghrh,Purb,Ascc1,Fiz1
GO:0031323	5,4	regulation of cellular metabolic process	2363	0.1612	68	0.16	0.0533711	D	P2rx7,Suv420h2,L3mbtl2,Ache,Med24,Bccip,Eif4e3,Pprc1,Hmgb2,Cln6,Foxh1,Capg,Zfpm1,Jund,Sox8,Hinfp,Kcnip3,Tcea2,Gtf2f1,Nfkbia,Ddit3,Snw1,Ssbp2,Eif2c2,Arid3b,Sap30l,Npas4,Cbs,Klf3,Wdtc1,Dnaja3,Sirt4,Sox12,Hexim1,Sox9,Fech,Ablim2,Cln3,Shh,Nkx2-2,Zscan20,Myt1,Arpc2,Klf11,Tef,Gnai2,Sp2,Bdp1,Npm1,Zfp354c,Btf3,Leo1,Timeless,Ptcd2,Vav2,Hr,Ikbkb,E2f2,Mcm6,Evl,Tnrc6b,Zfp524,Etv5,Ghrh,Purb,Ascc1,Actr3b,Fiz1
GO:0009889	5,4	regulation of biosynthetic process	2062	0.1407	57	0.1341	0.0531614	D	Suv420h2,L3mbtl2,Med24,Eif4e3,Pprc1,Hmgb2,Foxh1,Zfpm1,Jund,Sox8,Hinfp,Kcnip3,Tcea2,Gtf2f1,Nfkbia,Ddit3,Snw1,Ssbp2,Eif2c2,Arid3b,Sap30l,Npas4,Klf3,Wdtc1,Dnaja3,Sirt4,Sox12,Hexim1,Sox9,Fech,Ablim2,Shh,Nkx2-2,Zscan20,Myt1,Klf11,Tef,Gnai2,Sp2,Bdp1,Npm1,Zfp354c,Btf3,Leo1,Timeless,Hr,Ikbkb,Gchfr,E2f2,Mcm6,Tnrc6b,Zfp524,Etv5,Ghrh,Purb,Ascc1,Fiz1
GO:0006351	8,6,7	transcription, DNA-dependent	1781	0.1215	48	0.1129	0.0530956	D	Suv420h2,L3mbtl2,Med24,Pprc1,Hmgb2,Phrf1,Foxh1,Zfpm1,Jund,Sox8,Hinfp,Kcnip3,Tcea2,Gtf2f1,Ddit3,Snw1,Ssbp2,Eif2c2,Arid3b,Sap30l,Npas4,Klf3,Wdtc1,Sirt4,Sox12,Hexim1,Sox9,Ablim2,Shh,Nkx2-2,Zscan20,Myt1,Klf11,Tef,Sp2,Bdp1,Zfp354c,Btf3,Leo1,Timeless,Hr,E2f2,Mcm6,Zfp524,Etv5,Purb,Ascc1,Fiz1
GO:0006464	7,6	protein modification process	1195	0.0815	30	0.0706	0.0530278	D	P2rx7,Suv420h2,Wnk1,Rngtt,Dpm2,Ube4b,Aurkb,Nmt1,Gsk3a,Smurf1,Mst1r,Pigv,Cbs,Tssk6,Ube2s,Abi1,Sirt4,Ttll5,Sik1,Fech,Ube2q1,Araf,Skp2,Gspt1,Cdc42bpg,Herc2,Ppp3cb,Ikbkb,Brsk1,Prkcz
GO:0045449	7,8,6	regulation of transcription	1847	0.126	50	0.1176	0.0527913	D	Suv420h2,L3mbtl2,Med24,Pprc1,Hmgb2,Foxh1,Zfpm1,Jund,Sox8,Hinfp,Kcnip3,Tcea2,Gtf2f1,Nfkbia,Ddit3,Snw1,Ssbp2,Eif2c2,Arid3b,Sap30l,Npas4,Klf3,Wdtc1,Dnaja3,Sirt4,Sox12,Hexim1,Sox9,Ablim2,Shh,Nkx2-2,Zscan20,Myt1,Klf11,Tef,Sp2,Bdp1,Zfp354c,Btf3,Leo1,Timeless,Hr,Ikbkb,E2f2,Mcm6,Zfp524,Etv5,Purb,Ascc1,Fiz1
GO:0040008	4,3	regulation of growth	196	0.0134	2	0.0047	0.052588	D	Spnb4,Ghrh
GO:0032774	5,7,6	RNA biosynthetic process	1785	0.1218	48	0.1129	0.0525814	D	Suv420h2,L3mbtl2,Med24,Pprc1,Hmgb2,Phrf1,Foxh1,Zfpm1,Jund,Sox8,Hinfp,Kcnip3,Tcea2,Gtf2f1,Ddit3,Snw1,Ssbp2,Eif2c2,Arid3b,Sap30l,Npas4,Klf3,Wdtc1,Sirt4,Sox12,Hexim1,Sox9,Ablim2,Shh,Nkx2-2,Zscan20,Myt1,Klf11,Tef,Sp2,Bdp1,Zfp354c,Btf3,Leo1,Timeless,Hr,E2f2,Mcm6,Zfp524,Etv5,Purb,Ascc1,Fiz1
GO:0006813	7,8	potassium ion transport	151	0.0103	1	0.0024	0.0523802	D	Kcnip3
GO:0002376	2	immune system process	794	0.0542	18	0.0424	0.0509922	D	P2rx7,Ifi30,Dclre1c,Cd83,Nfkbia,Ccr4,Sit1,Aimp1,Dnaja3,Fech,Shh,Klf11,Gbp3,Ppp3cb,Ikbkb,Tob2,Il11ra1,Fancc
GO:0006355	8,7,9,6	regulation of transcription, DNA-dependent	1766	0.1205	47	0.1106	0.0507852	D	Suv420h2,L3mbtl2,Med24,Pprc1,Hmgb2,Foxh1,Zfpm1,Jund,Sox8,Hinfp,Kcnip3,Tcea2,Gtf2f1,Ddit3,Snw1,Ssbp2,Eif2c2,Arid3b,Sap30l,Npas4,Klf3,Wdtc1,Sirt4,Sox12,Hexim1,Sox9,Ablim2,Shh,Nkx2-2,Zscan20,Myt1,Klf11,Tef,Sp2,Bdp1,Zfp354c,Btf3,Leo1,Timeless,Hr,E2f2,Mcm6,Zfp524,Etv5,Purb,Ascc1,Fiz1
GO:0031326	6,5	regulation of cellular biosynthetic process	2058	0.1404	56	0.1318	0.0504981	D	Suv420h2,L3mbtl2,Med24,Eif4e3,Pprc1,Hmgb2,Foxh1,Zfpm1,Jund,Sox8,Hinfp,Kcnip3,Tcea2,Gtf2f1,Nfkbia,Ddit3,Snw1,Ssbp2,Eif2c2,Arid3b,Sap30l,Npas4,Klf3,Wdtc1,Dnaja3,Sirt4,Sox12,Hexim1,Sox9,Fech,Ablim2,Shh,Nkx2-2,Zscan20,Myt1,Klf11,Tef,Gnai2,Sp2,Bdp1,Npm1,Zfp354c,Btf3,Leo1,Timeless,Hr,Ikbkb,E2f2,Mcm6,Tnrc6b,Zfp524,Etv5,Ghrh,Purb,Ascc1,Fiz1
GO:0007167	7,6	enzyme linked receptor protein signaling pathway	283	0.0193	4	0.0094	0.0494993	D	Foxh1,Nrp1,Gsk3a,Bcar1
GO:0006793	4	phosphorus metabolic process	938	0.064	22	0.0518	0.0492729	D	P2rx7,Wnk1,Bccip,Rngtt,Aurkb,Gsk3a,Mst1r,Atp5c1,Cbs,Tssk6,Abi1,Sik1,Mtmr7,Fech,Araf,Cdc42bpg,Npm1,Vav2,Ppp3cb,Ikbkb,Brsk1,Prkcz
GO:0006796	5	phosphate metabolic process	938	0.064	22	0.0518	0.0492729	D	P2rx7,Wnk1,Bccip,Rngtt,Aurkb,Gsk3a,Mst1r,Atp5c1,Cbs,Tssk6,Abi1,Sik1,Mtmr7,Fech,Araf,Cdc42bpg,Npm1,Vav2,Ppp3cb,Ikbkb,Brsk1,Prkcz
GO:0010556	6,5	regulation of macromolecule biosynthetic process	1979	0.135	53	0.1247	0.0483966	D	Suv420h2,L3mbtl2,Med24,Eif4e3,Pprc1,Hmgb2,Foxh1,Zfpm1,Jund,Sox8,Hinfp,Kcnip3,Tcea2,Gtf2f1,Nfkbia,Ddit3,Snw1,Ssbp2,Eif2c2,Arid3b,Sap30l,Npas4,Klf3,Wdtc1,Dnaja3,Sirt4,Sox12,Hexim1,Sox9,Fech,Ablim2,Shh,Nkx2-2,Zscan20,Myt1,Klf11,Tef,Sp2,Bdp1,Zfp354c,Btf3,Leo1,Timeless,Hr,Ikbkb,E2f2,Mcm6,Tnrc6b,Zfp524,Etv5,Purb,Ascc1,Fiz1
GO:0007417	5,6	central nervous system development	327	0.0223	5	0.0118	0.0466866	D	Dkk1,Shh,Nkx2-2,Rpgrip1l,Ghrh
GO:0048514	6,7,8,5	blood vessel morphogenesis	206	0.0141	2	0.0047	0.0431781	D	Nrp1,Shh
GO:0048646	3,5,4	anatomical structure formation involved in morphogenesis	354	0.0241	5	0.0118	0.0311462	D	Nrp1,Fzd3,Shh,Rdh10,Pmp22
GO:0048513	4,5	organ development	1641	0.1119	39	0.0918	0.026272	D	P2rx7,Ache,Hmgb2,Foxh1,Dtnbp1,Dclre1c,Zfpm1,Cd83,Nrp1,Utrn,Fzd3,Nrp2,Nfkbia,Chrna1,Fscn2,Dnaja3,Hexim1,Dkk1,Sox9,Nphp3,Fech,Th,Shh,Nkx2-2,Klf11,Rpgrip1l,Unc45a,Prph2,Timeless,Ptcd2,Ppp3cb,Rdh10,Tob2,Etv5,Pphln1,Ghrh,Dfna5,Il11ra1,Cst6
GO:0006954	5	inflammatory response	233	0.0159	2	0.0047	0.0247662	D	P2rx7,Ccr4
GO:0001568	6,7	blood vessel development	250	0.0171	2	0.0047	0.0171913	D	Nrp1,Shh
GO:0001944	5,6	vasculature development	255	0.0174	2	0.0047	0.015411	D	Nrp1,Shh
GO:0006952	4	defense response	446	0.0304	6	0.0141	0.0142212	D	P2rx7,Lsp1,Nfkbia,Ccr4,Vdac3,Rarres2
GO:0050896	2	response to stimulus	2216	0.1512	52	0.1224	0.0133716	D	P2rx7,Ahsa1,Lsp1,Bccip,Hmgb2,Trpc2,Cln6,Idh1,Mbd4,Cnga3,Dtnbp1,Dclre1c,Cd83,Kcnip3,Nrp2,Gsk3a,Itpr1,Nfkbia,Ddit3,Slc22a18,Ccr4,Pxdn,Sit1,Cbs,Vdac3,Anxa5,Wdtc1,Xab2,Hspa8,Fech,Cln3,Th,Shh,F7,Serpinh1,Tbce,Kin,Smug1,Ccdc47,Gbp3,Npm1,Prph2,Timeless,Ppp3cb,Brsk1,Spnb4,Evl,Ghrh,Crb2,Fancc,Rarres2,Fv1
GO:0022610	2	biological adhesion	582	0.0397	9	0.0212	0.0128139	D	Pcdh1,Scarb2,Nrp1,Nrp2,Cyth3,Sox9,Prph2,Bcar1,Cldn11
GO:0007155	3	cell adhesion	582	0.0397	9	0.0212	0.0128139	D	Pcdh1,Scarb2,Nrp1,Nrp2,Cyth3,Sox9,Prph2,Bcar1,Cldn11
GO:0006955	3	immune response	474	0.0323	6	0.0141	0.0088765	D	P2rx7,Dclre1c,Nfkbia,Sit1,Gbp3,Ppp3cb
GO:0009653	4,3	anatomical structure morphogenesis	1186	0.0809	23	0.0541	0.0081173	D	P2rx7,Cdc42ep1,Nrp1,Fzd3,Fto,Stxbp1,Fscn2,Dkk1,Sox9,Th,Shh,Tbce,Metrn,Rpgrip1l,Timeless,Ptcd2,Brsk1,Rdh10,Spnb4,Evl,Pmp22,Etv5,Pphln1
GO:0065007	2	biological regulation	6588	0.4494	170	0.4	0.0045382	D	Gpbar1,P2rx7,Suv420h2,Lsp1,Srd5a1,Homer3,Lphn1,Traf5,Rangap1,L3mbtl2,Ache,Gng2,Med24,Wnk1,Bccip,Eif4e3,Syn3,Gmip,Cyth1,Pprc1,Ifi30,Hmgb2,Mfi2,Trpc2,Arhgef15,Cln6,Rab18,Oprl1,Cdc42ep1,Phrf1,Mbd4,Foxh1,Dtnbp1,Dclre1c,Capg,Zfpm1,Jund,Xrn1,Cd83,Sox8,Rtkn,Arf2,Emp1,Hinfp,Nrp1,Slc30a1,Nusap1,Fzd3,Rab5b,Caly,Sh2d3c,Kcnip3,Tcea2,Asb8,Gsk3a,Fzr1,Smurf1,Gtf2f1,Itpr1,Bag3,Nfkbia,Chrna1,Ddit3,Snw1,Ccr4,Dad1,…
GO:0009887	5,6,4	organ morphogenesis	785	0.0536	12	0.0282	0.0043101	D	P2rx7,Nrp1,Fzd3,Fscn2,Sox9,Th,Shh,Timeless,Ptcd2,Rdh10,Etv5,Pphln1
GO:0050789	3,2	regulation of biological process	6253	0.4266	150	0.3529	0.000294	D	Gpbar1,P2rx7,Suv420h2,Lsp1,Homer3,Lphn1,Traf5,Rangap1,L3mbtl2,Ache,Gng2,Med24,Wnk1,Bccip,Eif4e3,Gmip,Cyth1,Pprc1,Ifi30,Hmgb2,Arhgef15,Cln6,Rab18,Oprl1,Cdc42ep1,Phrf1,Mbd4,Foxh1,Capg,Zfpm1,Jund,Cd83,Sox8,Rtkn,Arf2,Hinfp,Nrp1,Nusap1,Fzd3,Rab5b,Caly,Sh2d3c,Kcnip3,Tcea2,Asb8,Gsk3a,Fzr1,Smurf1,Gtf2f1,Bag3,Nfkbia,Ddit3,Snw1,Ccr4,Dad1,Apbb3,Hrh1,Arl3,Ssbp2,Eif2c2,Arid3b,Sap30l,Npas4,Cbs,Stxbp1,Klf3,Anxa…
GO:0007154	3	cell communication	3785	0.2582	82	0.1929	0.0002815	D	Gpbar1,P2rx7,Lsp1,Homer3,Lphn1,Traf5,Rangap1,Ache,Gng2,Syn3,Gmip,Cyth1,Arhgef15,Rab18,Oprl1,Cdc42ep1,Phrf1,Mbd4,Foxh1,Dlgap5,Rtkn,Arf2,Nrp1,Fzd3,Rab5b,Caly,Sh2d3c,Asb8,Gsk3a,Nfkbia,Chrna1,Ddit3,Ccr4,Hrh1,Arl3,Sv2c,Npas4,Cbs,Stxbp1,Vdac3,Cnih4,Gapvd1,Pde2a,Stx4a,Fbxo8,Dnaja3,Sirt4,Cyth3,Sik1,Dkk1,Arhgef1,Cln3,Th,Shh,Nkx2-2,Asb2,Araf,Nmur1,Skp2,Aplnr,Gnai2,Cdc42bpg,Ccdc47,Npm1,Ddit4,Rpgrip1l,Rab11a…
GO:0050794	4,3	regulation of cellular process	6001	0.4094	141	0.3318	0.0001569	D	Gpbar1,P2rx7,Suv420h2,Lsp1,Homer3,Lphn1,Traf5,Rangap1,L3mbtl2,Ache,Gng2,Med24,Wnk1,Bccip,Eif4e3,Gmip,Cyth1,Pprc1,Ifi30,Hmgb2,Arhgef15,Cln6,Rab18,Oprl1,Cdc42ep1,Phrf1,Mbd4,Foxh1,Capg,Zfpm1,Jund,Cd83,Sox8,Rtkn,Arf2,Hinfp,Nrp1,Nusap1,Fzd3,Rab5b,Caly,Sh2d3c,Kcnip3,Tcea2,Asb8,Gsk3a,Fzr1,Gtf2f1,Bag3,Nfkbia,Ddit3,Snw1,Ccr4,Dad1,Apbb3,Hrh1,Arl3,Ssbp2,Eif2c2,Arid3b,Sap30l,Npas4,Cbs,Stxbp1,Klf3,Wdtc1,Cnih4…
GO:0032501	2	multicellular organismal process	4300	0.2933	92	0.2165	6.41255e-05	D	P2rx7,Mtap1a,Ctf1,Ache,Syn3,Slc7a5,Slc34a1,Hmgb2,Trpc2,Cln6,Cnga3,Foxh1,Dtnbp1,Dclre1c,Zfpm1,Jund,Cd83,Sox8,Phc2,Nrp1,Slc30a1,Utrn,Fzd3,Nmt1,Kcnip3,Nrp2,Smurf1,Itpr1,Tpp1,Nfkbia,Chrna1,Ccr4,Dad1,Katna1,Eif2c2,Fto,Arid3b,Sv2c,Wdr5,Stxbp1,Vdac3,Tssk6,Anxa5,Fscn2,Wdtc1,Xab2,Abi1,Stx4a,Dnaja3,Sik1,Hexim1,Dkk1,Sox9,Nphp3,Fech,Cln3,Th,Shh,F7,Nkx2-2,Serpinh1,4930506M07Rik,Myt1,Tbce,Klf11,Gnai2,Metrn,Ccd…
GO:0007165	5,4	signal transduction	3499	0.2387	70	0.1647	4.15891e-05	D	Gpbar1,P2rx7,Lsp1,Homer3,Lphn1,Traf5,Rangap1,Ache,Gng2,Gmip,Cyth1,Arhgef15,Rab18,Oprl1,Cdc42ep1,Phrf1,Mbd4,Foxh1,Rtkn,Arf2,Nrp1,Fzd3,Rab5b,Caly,Sh2d3c,Asb8,Gsk3a,Nfkbia,Ddit3,Ccr4,Hrh1,Arl3,Npas4,Cbs,Cnih4,Gapvd1,Pde2a,Fbxo8,Dnaja3,Cyth3,Sik1,Dkk1,Arhgef1,Cln3,Shh,Nkx2-2,Asb2,Araf,Nmur1,Skp2,Aplnr,Gnai2,Cdc42bpg,Ccdc47,Npm1,Ddit4,Rpgrip1l,Rab11a,Gnb5,Vav2,Gng8,Ikbkb,Sparc,Brsk1,Prkcz,Ghrh,Il11ra1…
GO:0050877	4	neurological system process	1741	0.1188	23	0.0541	2.06822e-06	D	P2rx7,Mtap1a,Ache,Syn3,Cln6,Cnga3,Dtnbp1,Kcnip3,Tpp1,Chrna1,Sv2c,Stxbp1,Vdac3,Stx4a,Cln3,Th,Prph2,Gch1,Rdh10,Spnb4,Pmp22,Dfna5,Cldn11
GO:0003008	3	system process	1900	0.1296	25	0.0588	6.15408e-07	D	P2rx7,Mtap1a,Ache,Syn3,Cln6,Cnga3,Dtnbp1,Kcnip3,Tpp1,Chrna1,Sv2c,Stxbp1,Vdac3,Stx4a,Cln3,Th,Tbce,Gnai2,Prph2,Gch1,Rdh10,Spnb4,Pmp22,Dfna5,Cldn11
GO:0050890	5	cognition	1539	0.105	13	0.0306	3.66298e-09	D	P2rx7,Mtap1a,Cln6,Cnga3,Dtnbp1,Kcnip3,Vdac3,Cln3,Th,Prph2,Rdh10,Spnb4,Dfna5
GO:0007600	6	sensory perception	1469	0.1002	11	0.0259	1.29753e-09	D	P2rx7,Mtap1a,Cln6,Cnga3,Dtnbp1,Kcnip3,Th,Prph2,Rdh10,Spnb4,Dfna5
GO:0007186	7,6	G-protein coupled receptor protein signaling pathway	1776	0.1212	16	0.0376	6.70389e-10	D	Gpbar1,Homer3,Lphn1,Gng2,Oprl1,Fzd3,Caly,Ccr4,Hrh1,Nmur1,Aplnr,Gnai2,Gnb5,Gng8,Ghrh,Bcar1
GO:0007166	6,5	cell surface receptor linked signal transduction	2452	0.1673	26	0.0612	1.84195e-11	D	Gpbar1,Homer3,Lphn1,Gng2,Oprl1,Foxh1,Nrp1,Fzd3,Caly,Gsk3a,Nfkbia,Ccr4,Hrh1,Dkk1,Cln3,Shh,Nkx2-2,Nmur1,Aplnr,Gnai2,Rpgrip1l,Gnb5,Gng8,Ghrh,Il11ra1,Bcar1

## Sheet: GO - CHART 100 kb
GO_ID	LEVEL(S)	TERM	NB_IN_REF	FREQ_IN_REF	NB_IN_SET	FREQ_IN_SET	P_VALUE	ENRICHMENT/DEPLETION	GENES_IN_SET
GO:0032502	2	developmental process	2915	0.1989	202	0.2704	2.69103e-07	E	Tcap,Ctf1,G6pdx,Rere,Ripply2,Hmgb2,Nnat,Lefty2,Cdc42ep1,Lep,Foxh1,Dclre1c,Zfpm1,Ebf3,Jund,Spred2,Zfp36l1,Cd83,Tbpl1,Zmiz1,Mkl2,Nrp1,Slc30a1,Utrn,Ahctf1,Nmt1,Camk1d,Kcnip3,Nrp2,Pick1,Apc,Cbfa2t3,Klf10,Nfkb1,Cbfb,Smurf1,2510003E04Rik,Rasgrp1,Dazl,Itpr1,Nfkbia,Nr4a3,Ccr4,Fmn2,Katna1,Wipf3,Eif2c2,Ezh2,Pdlim3,Ebf4,Arid3b,Odf1,Hmx1,Wdr5,Pitx1,Fat1,Wdtc1,Slit1,Fasl,Xab2,Kras,Krt8,Arap3,Sox1,Gfra2,Socs3,…
GO:0006996	3	organelle organization	1002	0.0684	84	0.1124	1.64033e-06	E	Suv420h2,Tcap,Cbx7,Capzb,L3mbtl2,Rere,Aurkb,Dclre1c,Capg,Tspyl4,Oip5,Fmnl1,Rab5b,Mad1l1,Apc,Chd9,Fzr1,Fmn2,Katna1,Capza2,Ezh2,Pdlim3,Nefh,Fat1,Clec2i,Kras,Cdc6,Cln3,Hook2,Shh,Pex26,Dst,Npm1,Daam1,Timeless,Ptcd2,Myh9,H2afz,Vps18,Hist1h4j,Myst4,Tacc2,H2afy2,Mtap1b,P2rx7,Cno,Lsp1,Diap1,Rbl2,Hist1h2ah,Cstad,Nek2,Prmt7,Cln6,Kif11,Dtnbp1,Xrn1,Smyd3,Gpx4,Tpp1,Smarcd1,Ablim1,Katnb1,Stxbp1,Tssk6,Uso1,Coro…
GO:0007275	3	multicellular organismal development	2476	0.1689	172	0.2303	2.10974e-06	E	Tcap,Ctf1,G6pdx,Rere,Ripply2,Hmgb2,Nnat,Lefty2,Lep,Foxh1,Dclre1c,Zfpm1,Ebf3,Jund,Spred2,Zfp36l1,Cd83,Zmiz1,Mkl2,Nrp1,Slc30a1,Utrn,Ahctf1,Nmt1,Nrp2,Pick1,Apc,Cbfa2t3,Klf10,Nfkb1,Cbfb,Smurf1,2510003E04Rik,Dazl,Itpr1,Nfkbia,Nr4a3,Ccr4,Fmn2,Katna1,Wipf3,Eif2c2,Ezh2,Pdlim3,Ebf4,Arid3b,Odf1,Hmx1,Wdr5,Pitx1,Wdtc1,Slit1,Fasl,Xab2,Kras,Krt8,Sox1,Gfra2,Socs3,Sik1,Hhat,Hexim1,Trp53bp2,Sox9,Nfatc1,B4galt1,Fe…
GO:0009058	3	biosynthetic process	3382	0.2307	219	0.2932	9.06001e-06	E	Scgb1a1,Suv420h2,Cbx7,Ppcdc,Alox5ap,Rybp,Papolb,Cyb5r3,L3mbtl2,G6pdx,Zfp455,Eif4e3,Il22,Rere,Tcea3,Hmgb2,Agpat4,Dpm2,Lep,Phrf1,Foxh1,Zfpm1,Ebf3,Jund,Zfp36l1,Tbpl1,Zmiz1,Hinfp,Gins2,Mkl2,Gm853,Ahctf1,Nmt1,Accsl,Kcnip3,Tcea2,Cbfa2t3,Chd9,Klf10,Nfkb1,Cbfb,Zfp157,Rpl7,Dazl,Nfkbia,Eef1g,Snw1,Nr4a3,Pigv,Cdipt,Ssbp2,Eif2c2,Ezh2,Ebf4,Arid3b,Sap30l,Zfp759,Npas4,Aimp1,Hmx1,Pitx1,Klf3,Ppp1r15b,Wdtc1,Clec2i,…
GO:0007010	4	cytoskeleton organization	305	0.0208	34	0.0455	9.08417e-06	E	Tcap,Capzb,Capg,Fmnl1,Apc,Fmn2,Katna1,Capza2,Pdlim3,Nefh,Fat1,Clec2i,Kras,Hook2,Shh,Dst,Npm1,Daam1,Myh9,Tacc2,Mtap1b,Lsp1,Diap1,Kif11,Ablim1,Coro1c,Ablim2,Tbce,Arpc2,Nuf2,Prkcz,Evl,Tln2,Actr3b
GO:0016043	2	cellular component organization	1801	0.1229	129	0.1727	1.05693e-05	E	Rab4a,Suv420h2,Tcap,Cbx7,Tuba1a,Capzb,L3mbtl2,Rere,Cdc42ep1,Eps15l1,Aurkb,Dclre1c,Capg,Tspyl4,Tbpl1,Zmiz1,Oip5,Fmnl1,Baiap2,Nrp1,Caly,Rab5b,Mad1l1,Pick1,Apc,Chd9,Fzr1,Fmn2,Katna1,Capza2,Ezh2,Pdlim3,Nefh,Fat1,Slit1,Clec2i,Kras,Krt8,Arap3,Cdc6,Sox9,Nfatc1,B4galt1,Fech,Cln3,Hook2,Wnt7b,Shh,Ttc8,Pex26,Dst,Npm1,Cadm1,Daam1,Timeless,Ptcd2,Klf7,Myh9,Vav2,Lrp11,H2afz,Tgfbi,Pmp22,Vps18,Hist1h4j,Myst4,Tacc…
GO:0044249	4	cellular biosynthetic process	3325	0.2268	212	0.2838	3.27073e-05	E	Scgb1a1,Suv420h2,Cbx7,Ppcdc,Alox5ap,Rybp,Papolb,Cyb5r3,L3mbtl2,G6pdx,Zfp455,Eif4e3,Il22,Rere,Tcea3,Hmgb2,Agpat4,Dpm2,Lep,Phrf1,Foxh1,Zfpm1,Ebf3,Jund,Zfp36l1,Tbpl1,Zmiz1,Hinfp,Gins2,Mkl2,Gm853,Ahctf1,Nmt1,Kcnip3,Tcea2,Cbfa2t3,Chd9,Klf10,Nfkb1,Cbfb,Zfp157,Rpl7,Dazl,Nfkbia,Eef1g,Snw1,Nr4a3,Pigv,Cdipt,Ssbp2,Eif2c2,Ezh2,Ebf4,Arid3b,Sap30l,Zfp759,Npas4,Aimp1,Hmx1,Pitx1,Klf3,Ppp1r15b,Wdtc1,Clec2i,Isx,Xa…
GO:0034960	5	cellular biopolymer metabolic process	4682	0.3194	285	0.3815	3.47849e-05	E	Scgb1a1,Suv420h2,Cbx7,Capzb,Rybp,Papolb,L3mbtl2,Zfp455,Bccip,Rngtt,Eif4e3,Ttll11,Il22,Rere,Tcea3,Hmgb2,Dpm2,Phrf1,Fbxo2,Ube4b,Prpf18,Foxh1,Aurkb,4931440F15Rik,Dclre1c,Capg,Zfpm1,Ebf3,Jund,Zfp36l1,Tbpl1,Zmiz1,Ppp4r2,Hinfp,Mamdc2,Gins2,Mkl2,Ahctf1,Nmt1,Camk1d,Kcnip3,Tcea2,Apc,Sgk1,Cbfa2t3,Chd9,Klf10,Nfkb1,Fzr1,Cbfb,Smurf1,Zfp157,Rpl7,Dazl,Nfkbia,Eef1g,Snw1,Nr4a3,Mst1r,Pigv,Ssbp2,Eif2c2,Capza2,Ndufs…
GO:0044237	3	cellular metabolic process	6119	0.4174	360	0.4819	3.84425e-05	E	Scgb1a1,Suv420h2,Cbx7,Ppcdc,Alox5ap,Capzb,Rybp,Papolb,Cyb5r3,L3mbtl2,G6pdx,Blvrb,Zfp455,Bccip,Rngtt,Eif4e3,Ttll11,Il22,Rere,Tcea3,Hmgb2,Agpat4,Ppa2,Dpm2,Lep,Phrf1,Fbxo2,Ube4b,Prpf18,Foxh1,Aurkb,4931440F15Rik,Dclre1c,Capg,Zfpm1,Ebf3,Jund,Spred2,Zfp36l1,Tbpl1,Enpp7,Zmiz1,Ppp4r2,Hinfp,Mamdc2,Gins2,Mkl2,Rpia,Gm853,Ahctf1,Nmt1,Galm,Camk1d,Kcnip3,Tcea2,Apc,Sgk1,Cbfa2t3,Nt5c3,Chd9,Klf10,Nfkb1,Fzr1,Cbfb,…
GO:0032868	6	response to insulin stimulus	52	0.0035	11	0.0147	4.08054e-05	E	Lep,Sgk1,Wdtc1,Socs3,Akt3,Grb10,Gsk3a,Irs2,Ptpn1,Acvr1c,Ghrhr
GO:0044238	3	primary metabolic process	6264	0.4273	365	0.4886	7.50619e-05	E	Scgb1a1,Suv420h2,Cbx7,Alox5ap,Capzb,Rybp,Papolb,Cyb5r3,L3mbtl2,G6pdx,Zfp455,Bccip,Rngtt,Eif4e3,Ttll11,Il22,Rere,Tcea3,Ifi30,Hmgb2,Cpvl,Agpat4,Dpm2,Lep,Phrf1,Fbxo2,Ube4b,Prpf18,Foxh1,Aurkb,4931440F15Rik,Dclre1c,Capg,Zfpm1,Ebf3,Jund,Zfp36l1,Tbpl1,Enpp7,Zmiz1,Ppp4r2,Hinfp,Mamdc2,Gins2,Mkl2,Rpia,Gm853,Ahctf1,Nmt1,Galm,Camk1d,Kcnip3,Tcea2,Apc,Sgk1,Cbfa2t3,Nt5c3,Chd9,Klf10,Nfkb1,Fzr1,Cbfb,Gls2,Smurf1,Z…
GO:0000226	5,4	microtubule cytoskeleton organization	87	0.0059	14	0.0187	8.94508e-05	E	Apc,Fmn2,Katna1,Nefh,Hook2,Dst,Npm1,Myh9,Tacc2,Mtap1b,Kif11,Tbce,Nuf2,Prkcz
GO:0044260	4	cellular macromolecule metabolic process	4788	0.3266	287	0.3842	9.51102e-05	E	Scgb1a1,Suv420h2,Cbx7,Capzb,Rybp,Papolb,L3mbtl2,Zfp455,Bccip,Rngtt,Eif4e3,Ttll11,Il22,Rere,Tcea3,Hmgb2,Dpm2,Phrf1,Fbxo2,Ube4b,Prpf18,Foxh1,Aurkb,4931440F15Rik,Dclre1c,Capg,Zfpm1,Ebf3,Jund,Zfp36l1,Tbpl1,Zmiz1,Ppp4r2,Hinfp,Mamdc2,Gins2,Mkl2,Rpia,Ahctf1,Nmt1,Camk1d,Kcnip3,Tcea2,Apc,Sgk1,Cbfa2t3,Chd9,Klf10,Nfkb1,Fzr1,Cbfb,Smurf1,Zfp157,Rpl7,Dazl,Nfkbia,Eef1g,Snw1,Nr4a3,Mst1r,Pigv,Ssbp2,Eif2c2,Capza2,…
GO:0051258	7,6	protein polymerization	78	0.0053	13	0.0174	0.0001095	E	Tuba1a,Capzb,Capg,Apc,Capza2,Clec2i,Diap1,Tuba1b,Tubb2b,Arpc2,Tubb3,Evl,Actr3b
GO:0006366	9,7,8	transcription from RNA polymerase II promoter	586	0.04	50	0.0669	0.0001115	E	Scgb1a1,Rybp,Il22,Tcea3,Hmgb2,Phrf1,Foxh1,Zfpm1,Tbpl1,Zmiz1,Mkl2,Kcnip3,Tcea2,Nfkb1,Cbfb,Snw1,Nr4a3,Npas4,Hmx1,Wdtc1,Trim27,Sox9,Shh,Nkx2-2,E2f6,Tef,Timeless,Rxra,Tbx2,Nrbf2,Ncor2,Nfix,Med24,Fubp3,Foxo3,Mafb,Mitf,Sox8,Irf1,Myf5,Vsx2,Ddit3,Ablim1,Sdpr,Eid1,Ablim2,Cnbp,Irf2bp2,Gtf2a1,Epc1
GO:0080090	5,4	regulation of primary metabolic process	2278	0.1554	150	0.2008	0.0001165	E	Scgb1a1,Suv420h2,Cbx7,Capzb,Rybp,L3mbtl2,Eif4e3,Il22,Rere,Tcea3,Hmgb2,Lep,Fbxo2,Foxh1,Capg,Zfpm1,Ebf3,Jund,Zfp36l1,Tbpl1,Zmiz1,Hinfp,Mkl2,Ahctf1,Kcnip3,Tcea2,Apc,Cbfa2t3,Chd9,Klf10,Nfkb1,Cbfb,Dazl,Nfkbia,Snw1,Nr4a3,Ssbp2,Eif2c2,Capza2,Ndufs4,Ezh2,Ebf4,Arid3b,Sap30l,Npas4,Hmx1,Pitx1,Klf3,Ppp1r15b,Wdtc1,Clec2i,Isx,Sox1,Trim27,Sirt4,Sox12,Socs3,Hexim1,Sox9,Nfatc1,Dedd2,Fech,Cln3,Shh,Nkx2-2,Zfp687,E2…
GO:0019222	4,3	regulation of metabolic process	2493	0.1701	162	0.2169	0.0001177	E	Scgb1a1,Suv420h2,Cbx7,Capzb,Rybp,L3mbtl2,Bccip,Eif4e3,Il22,Rere,Tcea3,Ifi30,Hmgb2,Lep,Fbxo2,Foxh1,Capg,Zfpm1,Ebf3,Jund,Spred2,Zfp36l1,Tbpl1,Zmiz1,Hinfp,Mkl2,Ahctf1,Kcnip3,Tcea2,Apc,Cbfa2t3,Chd9,Klf10,Nfkb1,Cbfb,Dazl,Nfkbia,Snw1,Nr4a3,Ssbp2,Eif2c2,Capza2,Ndufs4,Ezh2,Ebf4,Arid3b,Sap30l,Npas4,Hmx1,Pitx1,Klf3,Ppp1r15b,Wdtc1,Clec2i,Isx,Sox1,Trim27,Sirt4,Sox12,Socs3,Hexim1,Sox9,Nfatc1,Dedd2,Fech,Cln3,S…
GO:0045670	8,7,10,11,9,6	regulation of osteoclast differentiation	17	0.0012	6	0.008	0.0001201	E	Apc,Klf10,Cartpt,Mitf,Pik3r1,Tob2
GO:0006461	5,4	protein complex assembly	178	0.0121	21	0.0281	0.0001837	E	Tuba1a,Capzb,Capg,Pick1,Apc,Capza2,Clec2i,Npm1,P2rx7,Diap1,Ache,Ipo4,Tuba1b,Olfm1,Tbce,Tubb2b,Arpc2,Tubb3,Kcnma1,Evl,Actr3b
GO:0070271	3	protein complex biogenesis	178	0.0121	21	0.0281	0.0001837	E	Tuba1a,Capzb,Capg,Pick1,Apc,Capza2,Clec2i,Npm1,P2rx7,Diap1,Ache,Ipo4,Tuba1b,Olfm1,Tbce,Tubb2b,Arpc2,Tubb3,Kcnma1,Evl,Actr3b
GO:0010467	4	gene expression	2959	0.2019	186	0.249	0.0001992	E	Scgb1a1,Suv420h2,Cbx7,Rybp,Papolb,L3mbtl2,Zfp455,Rngtt,Eif4e3,Il22,Rere,Tcea3,Ifi30,Hmgb2,Phrf1,Prpf18,Foxh1,Zfpm1,Ebf3,Jund,Zfp36l1,Tbpl1,Zmiz1,Ppp4r2,Hinfp,Mkl2,Ahctf1,Kcnip3,Tcea2,Cbfa2t3,Chd9,Klf10,Nfkb1,Cbfb,Zfp157,Rpl7,Dazl,Nfkbia,Eef1g,Snw1,Nr4a3,Ssbp2,Eif2c2,Ezh2,Ebf4,Arid3b,Sap30l,Zfp759,Npas4,Aimp1,Hmx1,Pitx1,Larp7,Klf3,Ppp1r15b,Wdtc1,Isx,Xab2,Sox1,Trim27,Cyld,Sirt4,Sox12,Ttll5,Hexim1,S…
GO:0031323	5,4	regulation of cellular metabolic process	2363	0.1612	153	0.2048	0.0002052	E	Scgb1a1,Suv420h2,Cbx7,Capzb,Rybp,L3mbtl2,Bccip,Eif4e3,Il22,Rere,Tcea3,Hmgb2,Lep,Fbxo2,Foxh1,Capg,Zfpm1,Ebf3,Jund,Spred2,Zfp36l1,Tbpl1,Zmiz1,Hinfp,Mkl2,Ahctf1,Kcnip3,Tcea2,Apc,Cbfa2t3,Chd9,Klf10,Nfkb1,Cbfb,Dazl,Nfkbia,Snw1,Nr4a3,Ssbp2,Eif2c2,Capza2,Ndufs4,Ezh2,Ebf4,Arid3b,Sap30l,Npas4,Hmx1,Pitx1,Klf3,Ppp1r15b,Wdtc1,Clec2i,Isx,Sox1,Trim27,Sirt4,Sox12,Socs3,Hexim1,Sox9,Nfatc1,Dedd2,Fech,Cln3,Shh,Nkx…
GO:0032869	5,6,7	cellular response to insulin stimulus	43	0.0029	9	0.012	0.0002148	E	Sgk1,Wdtc1,Socs3,Akt3,Grb10,Gsk3a,Irs2,Ptpn1,Ghrhr
GO:0008152	2	metabolic process	7146	0.4875	405	0.5422	0.0002703	E	Scgb1a1,Suv420h2,Cbx7,Ppcdc,Alox5ap,Capzb,Rybp,Papolb,Cyb5r3,L3mbtl2,G6pdx,Blvrb,Zfp455,Bccip,Rngtt,Eif4e3,Ttll11,Il22,Rere,Tcea3,Ifi30,Hmgb2,Cpvl,Agpat4,Ppa2,Dpm2,Lep,Phrf1,Fbxo2,Ube4b,Hmgcl,Prpf18,Foxh1,Aurkb,4931440F15Rik,Dclre1c,Capg,Zfpm1,Ebf3,Jund,Spred2,Zfp36l1,Tbpl1,Enpp7,Zmiz1,Ppp4r2,Hinfp,Mamdc2,Gins2,Mkl2,Rpia,Gm853,Ahctf1,Nmt1,Accsl,Galm,Camk1d,Kcnip3,Tcea2,Pick1,Apc,Sgk1,Cbfa2t3,Nt5c…
GO:0009719	3	response to endogenous stimulus	121	0.0083	16	0.0214	0.0002874	E	Trh,Hmgb2,Lep,Sgk1,Wdtc1,Socs3,Akt3,Slc18a2,Grb10,Gsk3a,Drd5,Irs2,Ptpn1,Acvr1c,Adora2a,Ghrhr
GO:0007267	4	cell-cell signaling	353	0.0241	33	0.0442	0.0002986	E	Syn3,Nnat,Lep,Dlgap5,Pick1,Sv2c,Vdac3,Kras,Stx4a,Sirt4,Cln3,Wnt7b,Shh,Th,Cartpt,Scn1a,Pmp22,P2rx7,Ache,Wnt3,Snap25,Chrna1,Drd5,Wnt10a,Stxbp1,Cd9,Acvr1c,Adora2a,Kcnma1,Ghrh,Ghrhr,Cldn11,Wnt2
GO:0032870	4,5	cellular response to hormone stimulus	55	0.0038	10	0.0134	0.0003184	E	Trh,Sgk1,Wdtc1,Socs3,Akt3,Grb10,Gsk3a,Irs2,Ptpn1,Ghrhr
GO:0048856	3	anatomical structure development	2121	0.1447	138	0.1847	0.0003271	E	Tcap,Ctf1,G6pdx,Ripply2,Hmgb2,Cdc42ep1,Lep,Foxh1,Dclre1c,Zfpm1,Jund,Zfp36l1,Cd83,Tbpl1,Zmiz1,Mkl2,Nrp1,Utrn,Nrp2,Apc,Cbfa2t3,Klf10,Nfkb1,Cbfb,Smurf1,2510003E04Rik,Nfkbia,Nr4a3,Ccr4,Katna1,Ezh2,Pdlim3,Wdr5,Pitx1,Fat1,Slit1,Fasl,Xab2,Kras,Krt8,Arap3,Sox1,Gfra2,Socs3,Hexim1,Trp53bp2,Sox9,Nfatc1,B4galt1,Fech,Wnt7b,Shh,Th,Nkx2-2,Flnb,Ankrd17,Klf11,Dst,Cartpt,Cadm1,Prph2,Timeless,Ptcd2,Klf7,Rxra,Myh9,P…
GO:0010646	5,4	regulation of cell communication	585	0.0399	48	0.0643	0.0003348	E	Ralgds,Cyth1,Il22,Arhgef15,Nnat,Lep,Spred2,Apc,Rasgrp1,Nfkbia,Rgs4,Kras,Rasa2,Arap3,Sirt4,Iqsec1,Socs3,Cln3,Rgs2,Npm1,Agap1,Vav2,Arhgef7,Iqgap1,P2rx7,Ache,Asap3,Garnl3,Grb10,Arhgef3,Drd5,Aplp2,Rasa3,Cbs,Stxbp1,Ada,Gapvd1,Fbxo8,Cyth3,Dkk1,Arhgef1,Acvr1c,Skp2,Adora2a,Dkk4,Ddit4,Ghrh,Ghrhr
GO:0065003	4	macromolecular complex assembly	327	0.0223	31	0.0415	0.0003488	E	Tuba1a,Capzb,Capg,Tspyl4,Tbpl1,Pick1,Apc,Capza2,Clec2i,Fech,Npm1,H2afz,Hist1h4j,Myst4,H2afy2,P2rx7,Diap1,Ache,Hist1h2ah,Ipo4,Tuba1b,Olfm1,Tbce,Tubb2b,Arpc2,Tubb3,Kcnma1,Evl,H3f3b,Gtf2a1,Actr3b
GO:0007017	3	microtubule-based process	174	0.0119	20	0.0268	0.0003509	E	Tuba1a,Apc,Dnahc17,Fmn2,Katna1,Kif2c,Nefh,Hook2,Dst,Npm1,Myh9,Tacc2,Mtap1b,Kif11,Tuba1b,Tbce,Tubb2b,Tubb3,Nuf2,Prkcz
GO:0048519	4,2,3	negative regulation of biological process	1118	0.0763	80	0.1071	0.0004062	E	Scgb1a1,Capzb,Rybp,Ifi30,Lep,Foxh1,Capg,Zfpm1,Cd83,Nrp1,Kcnip3,Apc,Nfkb1,Smurf1,Nfkbia,Snw1,Rgs4,Eif2c2,Capza2,Ezh2,Hmx1,Wdtc1,Kras,Arap3,Trim27,Xcl1,Sirt4,Socs3,Tmbim6,Sox9,B4galt1,Cln3,Shh,Nkx2-2,Klf11,Rgs2,Npm1,Cartpt,Timeless,Ppp3cb,Gchfr,Tbx2,Eef1a2,Tnrc6b,Purb,Xrcc4,Ncor2,P2rx7,Vegfa,Asph,Mitf,Grb10,Lhx4,Vsx2,Bag3,Dad1,Apbb3,Hlx,Drd5,Tnrc6a,Stxbp1,Ada,Anxa5,Eid1,Cd9,Dkk1,Nphp3,Acvr1c,Dnajb6…
GO:0007242	6,5	intracellular signaling cascade	967	0.066	71	0.095	0.0004134	E	Rab4a,Ralgds,Plekhm1,Trh,Gmip,Cyth1,Il22,Arhgef15,Rab18,Cdc42ep1,Phrf1,Spred2,Bcar3,Arf2,Baiap2,Rab5b,Pick1,Apc,Rasgrp1,Depdc1b,Ppp1r15b,Cnih4,Kras,Rasa2,Arap3,Iqsec1,Socs3,Sik1,Nfatc1,Asb2,Araf,Npm1,Cartpt,Agap1,Rab11a,Vav2,Arhgef7,Iqgap1,Tshr,Rsu1,P2rx7,Rab39b,Asap3,Wsb1,Garnl3,Sh2d3c,Mif,Asb8,Ddit3,Arhgef3,Drd5,Rasa3,Cbs,Ada,Gapvd1,Rab31,Fbxo8,Cyth3,Scg2,Arhgef1,Skp2,Gnai2,Cdc42bpg,Adora2a,Opr…
GO:0045637	6,5,8,9,7,4	regulation of myeloid cell differentiation	47	0.0032	9	0.012	0.0004219	E	Lep,Apc,Klf10,Nfkbia,Cartpt,Foxo3,Mitf,Pik3r1,Tob2
GO:0009116	6	nucleoside metabolic process	21	0.0014	6	0.008	0.0004278	E	Tbpl1,Umps,Qtrt1,Mtap,Ada,Cda
GO:0009987	2	cellular process	11167	0.7618	602	0.8059	0.0004594	E	Rab4a,Scgb1a1,Suv420h2,Tcap,Lphn1,Cbx7,Cdc123,Tuba1a,Ppcdc,Alox5ap,Rangap1,Capzb,Rybp,Papolb,Ctf1,Pcdh1,Cyb5r3,L3mbtl2,G6pdx,Ralgds,Blvrb,Plekhm1,Gng2,Zfp455,Bccip,Rngtt,Trh,Eif4e3,Gmip,Syn3,Cyth1,Ttll11,Il22,Rere,Tcea3,Ap3s2,Ifi30,Hmgb2,Mfi2,Agpat4,Arhgef15,Rab18,Oprl1,Ppa2,Nnat,Lefty2,Dpm2,Cdc42ep1,Lep,Eps15l1,Phrf1,Fbxo2,Ube4b,Tomm20,Prpf18,Foxh1,Aurkb,4931440F15Rik,Dclre1c,Capg,Zfpm1,Ebf3,Dlg…
GO:0051246	6,5	regulation of protein metabolic process	349	0.0238	32	0.0428	0.0004891	E	Capzb,Eif4e3,Il22,Fbxo2,Capg,Zfp36l1,Apc,Dazl,Eif2c2,Capza2,Ndufs4,Ppp1r15b,Clec2i,Socs3,Fech,Cln3,Shh,Prkar1a,Tnrc6b,P2rx7,Ache,Cln6,Atg10,Tnrc6a,Cbs,Ube2s,Ube2q1,Arpc2,Psmd3,Evl,Actr3b,Ghrhr
GO:0048869	3	cellular developmental process	1611	0.1099	108	0.1446	0.0004891	E	Tcap,Ctf1,G6pdx,Cdc42ep1,Lep,Dclre1c,Jund,Zfp36l1,Cd83,Tbpl1,Zmiz1,Mkl2,Nrp1,Nrp2,Apc,Cbfa2t3,Klf10,Cbfb,2510003E04Rik,Rasgrp1,Dazl,Nfkbia,Ccr4,Katna1,Wipf3,Eif2c2,Ezh2,Odf1,Pitx1,Fat1,Slit1,Fasl,Kras,Krt8,Arap3,Sox1,Socs3,Sik1,Sox9,Nfatc1,B4galt1,Fech,Wnt7b,Shh,Th,Ttc8,Nkx2-2,Rgs2,Tle3,Dst,Cartpt,Cadm1,Ptcd2,Klf7,Rxra,Myh9,Ppp3cb,Tbx2,Kcne1,Pmp22,Il11ra1,Purb,Tacc2,Fancc,Xrcc4,Rarres2,Mtap1b,Tsh…
GO:0060255	5,4	regulation of macromolecule metabolic process	2289	0.1561	146	0.1954	0.0004909	E	Scgb1a1,Suv420h2,Cbx7,Capzb,Rybp,L3mbtl2,Eif4e3,Il22,Rere,Tcea3,Ifi30,Hmgb2,Fbxo2,Foxh1,Capg,Zfpm1,Ebf3,Jund,Zfp36l1,Tbpl1,Zmiz1,Hinfp,Mkl2,Ahctf1,Kcnip3,Tcea2,Apc,Cbfa2t3,Chd9,Klf10,Nfkb1,Cbfb,Dazl,Nfkbia,Snw1,Nr4a3,Ssbp2,Eif2c2,Capza2,Ndufs4,Ezh2,Ebf4,Arid3b,Sap30l,Npas4,Hmx1,Pitx1,Klf3,Ppp1r15b,Wdtc1,Clec2i,Isx,Sox1,Trim27,Sirt4,Sox12,Socs3,Hexim1,Sox9,Nfatc1,Dedd2,Fech,Cln3,Shh,Nkx2-2,Zfp687,…
GO:0043283	4	biopolymer metabolic process	5146	0.351	299	0.4003	0.0005027	E	Scgb1a1,Suv420h2,Cbx7,Capzb,Rybp,Papolb,L3mbtl2,Zfp455,Bccip,Rngtt,Eif4e3,Ttll11,Il22,Rere,Tcea3,Ifi30,Hmgb2,Cpvl,Dpm2,Phrf1,Fbxo2,Ube4b,Prpf18,Foxh1,Aurkb,4931440F15Rik,Dclre1c,Capg,Zfpm1,Ebf3,Jund,Zfp36l1,Tbpl1,Zmiz1,Ppp4r2,Hinfp,Mamdc2,Gins2,Mkl2,Ahctf1,Nmt1,Camk1d,Kcnip3,Tcea2,Apc,Sgk1,Cbfa2t3,Chd9,Klf10,Nfkb1,Fzr1,Cbfb,Smurf1,Zfp157,Rpl7,Dazl,Nfkbia,Eef1g,Snw1,Nr4a3,Mst1r,Pigv,Ssbp2,Eif2c2,C…
GO:0032268	6,7,5	regulation of cellular protein metabolic process	291	0.0199	28	0.0375	0.0005055	E	Capzb,Eif4e3,Il22,Fbxo2,Capg,Zfp36l1,Apc,Dazl,Eif2c2,Capza2,Ndufs4,Ppp1r15b,Clec2i,Socs3,Fech,Cln3,Shh,Prkar1a,Tnrc6b,P2rx7,Ache,Cln6,Atg10,Tnrc6a,Cbs,Arpc2,Evl,Actr3b
GO:0016070	6,5	RNA metabolic process	2221	0.1515	142	0.1901	0.0005253	E	Scgb1a1,Suv420h2,Cbx7,Rybp,Papolb,L3mbtl2,Rngtt,Il22,Rere,Tcea3,Hmgb2,Phrf1,Prpf18,Foxh1,Zfpm1,Ebf3,Jund,Zfp36l1,Tbpl1,Zmiz1,Ppp4r2,Hinfp,Mkl2,Kcnip3,Tcea2,Cbfa2t3,Chd9,Klf10,Nfkb1,Cbfb,Snw1,Nr4a3,Ssbp2,Eif2c2,Ezh2,Ebf4,Arid3b,Sap30l,Dcps,Npas4,Hmx1,Pitx1,Larp7,Klf3,Wdtc1,Isx,Xab2,Sox1,Trim27,Sirt4,Sox12,Hexim1,Sox9,Nfatc1,Dedd2,Shh,Nkx2-2,1500002O20Rik,Zfp687,E2f6,Klf11,Kin,Tef,Tle3,Hnrnph1,Npm1…
GO:0065008	3	regulation of biological quality	1045	0.0713	75	0.1004	0.0005375	E	Capzb,G6pdx,Syn3,Ifi30,Mfi2,Nnat,Lefty2,Cdc42ep1,Lep,Dclre1c,Capg,Slc30a1,Pick1,Apc,Itpr1,Capza2,Wdtc1,Clec2i,Arap3,Stx4a,Xcl1,Sirt4,Ctrc,Fech,Fh1,Cln3,Shh,Th,F7,Nhlrc2,Lipc,Npm1,Cartpt,Myh9,Ppp3cb,Gch1,Efhc1,Scn1a,Glrx5,Pmp22,Fancc,Cyp11a1,P2rx7,Vegfa,Ache,Cln6,Foxo3,F2r,Dtnbp1,Snap25,Xrn1,Emp1,Chrna1,Ddit3,Drd5,Pomc,Tnrc6a,Aplp2,Ada,Anxa5,Nxn,Cd9,Acvr1c,4930506M07Rik,Arpc2,Txn2,Adora2a,Kcnma1,N…
GO:0006357	9,8,10,7	regulation of transcription from RNA polymerase II promoter	552	0.0377	45	0.0602	0.0005483	E	Scgb1a1,Rybp,Il22,Tcea3,Hmgb2,Foxh1,Zfpm1,Zmiz1,Mkl2,Kcnip3,Tcea2,Nfkb1,Cbfb,Snw1,Nr4a3,Npas4,Hmx1,Wdtc1,Trim27,Sox9,Shh,Nkx2-2,E2f6,Tef,Timeless,Rxra,Tbx2,Nrbf2,Ncor2,Nfix,Fubp3,Foxo3,Mafb,Mitf,Sox8,Irf1,Myf5,Vsx2,Ablim1,Sdpr,Eid1,Ablim2,Cnbp,Irf2bp2,Epc1
GO:0030316	7,9,10,8	osteoclast differentiation	22	0.0015	6	0.008	0.0005585	E	Apc,Klf10,Cartpt,Mitf,Pik3r1,Tob2
GO:0043623	6,5	cellular protein complex assembly	129	0.0088	16	0.0214	0.0005666	E	Tuba1a,Capzb,Capg,Pick1,Apc,Capza2,Clec2i,Diap1,Ipo4,Tuba1b,Tbce,Tubb2b,Arpc2,Tubb3,Evl,Actr3b
GO:0051056	7,8,6	regulation of small GTPase mediated signal transduction	183	0.0125	20	0.0268	0.0006414	E	Ralgds,Cyth1,Arhgef15,Rasgrp1,Kras,Rasa2,Arap3,Iqsec1,Agap1,Vav2,Arhgef7,Iqgap1,Asap3,Garnl3,Arhgef3,Rasa3,Gapvd1,Fbxo8,Cyth3,Arhgef1
GO:0046849	4	bone remodeling	61	0.0042	10	0.0134	0.0007194	E	Slc34a1,Jund,Apc,Smurf1,Sox9,Wnt7b,Cartpt,P2rx7,Mitf,Tob2
GO:0043434	5	response to peptide hormone stimulus	72	0.0049	11	0.0147	0.0007255	E	Lep,Sgk1,Wdtc1,Socs3,Akt3,Grb10,Gsk3a,Irs2,Ptpn1,Acvr1c,Ghrhr
GO:0048731	4	system development	1989	0.1357	128	0.1714	0.0007279	E	Tcap,Ctf1,G6pdx,Ripply2,Hmgb2,Lep,Foxh1,Dclre1c,Zfpm1,Jund,Zfp36l1,Cd83,Zmiz1,Mkl2,Nrp1,Utrn,Nrp2,Apc,Cbfa2t3,Klf10,Nfkb1,Cbfb,Smurf1,2510003E04Rik,Nfkbia,Nr4a3,Ccr4,Katna1,Ezh2,Pdlim3,Wdr5,Pitx1,Slit1,Fasl,Kras,Krt8,Sox1,Gfra2,Socs3,Hexim1,Trp53bp2,Sox9,Nfatc1,B4galt1,Fech,Wnt7b,Shh,Th,Nkx2-2,Flnb,Ankrd17,Klf11,Dst,Cartpt,Cadm1,Prph2,Timeless,Ptcd2,Klf7,Rxra,Myh9,Ppp3cb,Prkar1a,Tbx2,Foxi1,Kcne1,…
GO:0022607	3	cellular component assembly	467	0.0319	39	0.0522	0.0007624	E	Tcap,Tuba1a,Capzb,Capg,Tspyl4,Tbpl1,Baiap2,Pick1,Apc,Capza2,Nefh,Clec2i,Fech,Npm1,Vav2,H2afz,Pmp22,Hist1h4j,Myst4,H2afy2,P2rx7,Diap1,Ache,Hist1h2ah,Ipo4,Tuba1b,Cd9,Olfm1,Coro1c,Tbce,Tubb2b,Arpc2,Tubb3,Vcl,Kcnma1,Evl,H3f3b,Gtf2a1,Actr3b
GO:0006139	4	nucleobase, nucleoside, nucleotide and nucleic acid metabolic process	3112	0.2123	189	0.253	0.0008164	E	Scgb1a1,Suv420h2,Cbx7,Rybp,Papolb,L3mbtl2,G6pdx,Zfp455,Bccip,Rngtt,Il22,Rere,Tcea3,Hmgb2,Phrf1,Prpf18,Foxh1,Dclre1c,Zfpm1,Ebf3,Jund,Zfp36l1,Tbpl1,Zmiz1,Ppp4r2,Hinfp,Gins2,Mkl2,Rpia,Ahctf1,Kcnip3,Tcea2,Cbfa2t3,Nt5c3,Chd9,Klf10,Nfkb1,Cbfb,Zfp157,Nfkbia,Snw1,Nr4a3,Ssbp2,Eif2c2,Ezh2,Ebf4,Arid3b,Sap30l,Dcps,Zfp759,Npas4,Hmx1,Pitx1,Larp7,Lonp1,Klf3,Wdtc1,Isx,Xab2,Sox1,Trim27,Sirt4,Sox12,Ttll5,Cdc6,Hexi…
GO:0030154	4	cell differentiation	1535	0.1047	102	0.1365	0.0008533	E	Tcap,Ctf1,G6pdx,Lep,Dclre1c,Jund,Zfp36l1,Cd83,Tbpl1,Zmiz1,Mkl2,Nrp1,Nrp2,Apc,Cbfa2t3,Klf10,Cbfb,2510003E04Rik,Rasgrp1,Dazl,Nfkbia,Ccr4,Katna1,Wipf3,Eif2c2,Ezh2,Odf1,Pitx1,Slit1,Fasl,Kras,Krt8,Sox1,Socs3,Sik1,Sox9,Nfatc1,B4galt1,Fech,Wnt7b,Shh,Th,Ttc8,Nkx2-2,Rgs2,Tle3,Dst,Cartpt,Cadm1,Ptcd2,Klf7,Rxra,Myh9,Ppp3cb,Tbx2,Kcne1,Il11ra1,Purb,Tacc2,Fancc,Xrcc4,Rarres2,Mtap1b,Tshr,Mreg,Vegfa,Slc7a5,Prmt7,…
GO:0051241	5,3,4	negative regulation of multicellular organismal process	85	0.0058	12	0.0161	0.0008566	E	Scgb1a1,Cd83,Nfkb1,Smurf1,Sox9,Cartpt,P2rx7,Drd5,Stxbp1,Ada,Anxa5,Kcnma1
GO:0043170	3	macromolecule metabolic process	5310	0.3622	305	0.4083	0.0008689	E	Scgb1a1,Suv420h2,Cbx7,Capzb,Rybp,Papolb,L3mbtl2,Zfp455,Bccip,Rngtt,Eif4e3,Ttll11,Il22,Rere,Tcea3,Ifi30,Hmgb2,Cpvl,Dpm2,Phrf1,Fbxo2,Ube4b,Prpf18,Foxh1,Aurkb,4931440F15Rik,Dclre1c,Capg,Zfpm1,Ebf3,Jund,Zfp36l1,Tbpl1,Zmiz1,Ppp4r2,Hinfp,Mamdc2,Gins2,Mkl2,Rpia,Ahctf1,Nmt1,Camk1d,Kcnip3,Tcea2,Pick1,Apc,Sgk1,Cbfa2t3,Chd9,Klf10,Nfkb1,Fzr1,Cbfb,Smurf1,Zfp157,Rpl7,Dazl,Nfkbia,Eef1g,Snw1,Nr4a3,Mst1r,Pigv,Ssb…
GO:0045935	7,5,6	positive regulation of nucleobase, nucleoside, nucleotide and nucleic acid metabolic process	424	0.0289	36	0.0482	0.0008744	E	Il22,Hmgb2,Foxh1,Ebf3,Zmiz1,Mkl2,Nfkb1,Cbfb,Snw1,Nr4a3,Npas4,Sox9,Shh,Nkx2-2,Tef,Klf7,Rxra,Foxi1,Nfix,Fubp3,Foxo3,Mafb,Mitf,Sox8,Irf1,Myf5,Vsx2,Gtf2f1,Ablim1,Sdpr,Ablim2,Cnbp,Adora2a,Etv5,Ghrh,Epc1
GO:0002791	7,6	regulation of peptide secretion	24	0.0016	6	0.008	0.0009081	E	Nnat,Lep,Sirt4,Acvr1c,Ghrh,Ghrhr
GO:0007264	7,6	small GTPase mediated signal transduction	381	0.026	33	0.0442	0.0009924	E	Rab4a,Ralgds,Cyth1,Arhgef15,Rab18,Cdc42ep1,Bcar3,Arf2,Baiap2,Rab5b,Rasgrp1,Kras,Rasa2,Arap3,Iqsec1,Agap1,Rab11a,Vav2,Arhgef7,Iqgap1,Rsu1,Rab39b,Asap3,Garnl3,Sh2d3c,Arhgef3,Rasa3,Gapvd1,Rab31,Fbxo8,Cyth3,Arhgef1,Arl4a
GO:0034961	6	cellular biopolymer biosynthetic process	2575	0.1757	159	0.2129	0.0010229	E	Scgb1a1,Suv420h2,Cbx7,Rybp,Papolb,L3mbtl2,Zfp455,Eif4e3,Il22,Rere,Tcea3,Hmgb2,Phrf1,Foxh1,Zfpm1,Ebf3,Jund,Zfp36l1,Tbpl1,Zmiz1,Hinfp,Gins2,Mkl2,Ahctf1,Kcnip3,Tcea2,Cbfa2t3,Chd9,Klf10,Nfkb1,Cbfb,Zfp157,Rpl7,Dazl,Nfkbia,Eef1g,Snw1,Nr4a3,Ssbp2,Eif2c2,Ezh2,Ebf4,Arid3b,Sap30l,Zfp759,Npas4,Aimp1,Hmx1,Pitx1,Klf3,Ppp1r15b,Wdtc1,Isx,Xab2,Sox1,Trim27,Cyld,Sirt4,Sox12,Ttll5,Cdc6,Hexim1,Sox9,Nfatc1,Dedd2,Fech…
GO:0043284	5	biopolymer biosynthetic process	2576	0.1757	159	0.2129	0.0010371	E	Scgb1a1,Suv420h2,Cbx7,Rybp,Papolb,L3mbtl2,Zfp455,Eif4e3,Il22,Rere,Tcea3,Hmgb2,Phrf1,Foxh1,Zfpm1,Ebf3,Jund,Zfp36l1,Tbpl1,Zmiz1,Hinfp,Gins2,Mkl2,Ahctf1,Kcnip3,Tcea2,Cbfa2t3,Chd9,Klf10,Nfkb1,Cbfb,Zfp157,Rpl7,Dazl,Nfkbia,Eef1g,Snw1,Nr4a3,Ssbp2,Eif2c2,Ezh2,Ebf4,Arid3b,Sap30l,Zfp759,Npas4,Aimp1,Hmx1,Pitx1,Klf3,Ppp1r15b,Wdtc1,Isx,Xab2,Sox1,Trim27,Cyld,Sirt4,Sox12,Ttll5,Cdc6,Hexim1,Sox9,Nfatc1,Dedd2,Fech…
GO:0044085	2	cellular component biogenesis	574	0.0392	45	0.0602	0.0011124	E	Tcap,Tuba1a,Capzb,Capg,Tspyl4,Tbpl1,Baiap2,Pick1,Apc,Capza2,Nefh,Clec2i,Fech,Npm1,Cadm1,Vav2,H2afz,Pmp22,Hist1h4j,Myst4,H2afy2,P2rx7,Diap1,Ache,Hist1h2ah,Ipo4,Tuba1b,Rrs1,Utp23,Cd9,Olfm1,Coro1c,Gnl3l,Tbce,Tubb2b,Arpc2,Tubb3,Vcl,2410016O06Rik,Kcnma1,Evl,H3f3b,Gtf2a1,Actr3b,Naf1
GO:0019725	5,3	cellular homeostasis	293	0.02	27	0.0361	0.001113	E	Mfi2,Slc30a1,Apc,Itpr1,Wdtc1,Xcl1,Ctrc,Cln3,Nhlrc2,Npm1,Cartpt,Efhc1,Scn1a,Glrx5,Pmp22,P2rx7,Cln6,Chrna1,Ddit3,Aplp2,Nxn,Cd9,4930506M07Rik,Txn2,Adora2a,Kcnma1,Cldn11
GO:0032012	9,10,8	regulation of ARF protein signal transduction	34	0.0023	7	0.0094	0.0011518	E	Cyth1,Arap3,Iqsec1,Agap1,Asap3,Fbxo8,Cyth3
GO:0032011	9,8	ARF protein signal transduction	34	0.0023	7	0.0094	0.0011518	E	Cyth1,Arap3,Iqsec1,Agap1,Asap3,Fbxo8,Cyth3
GO:0009059	4	macromolecule biosynthetic process	2768	0.1888	169	0.2262	0.001152	E	Scgb1a1,Suv420h2,Cbx7,Rybp,Papolb,L3mbtl2,Zfp455,Eif4e3,Il22,Rere,Tcea3,Hmgb2,Dpm2,Phrf1,Foxh1,Zfpm1,Ebf3,Jund,Zfp36l1,Tbpl1,Zmiz1,Hinfp,Gins2,Mkl2,Ahctf1,Nmt1,Kcnip3,Tcea2,Cbfa2t3,Chd9,Klf10,Nfkb1,Cbfb,Zfp157,Rpl7,Dazl,Nfkbia,Eef1g,Snw1,Nr4a3,Pigv,Ssbp2,Eif2c2,Ezh2,Ebf4,Arid3b,Sap30l,Zfp759,Npas4,Aimp1,Hmx1,Pitx1,Klf3,Ppp1r15b,Wdtc1,Clec2i,Isx,Xab2,Sox1,Trim27,Cyld,Sirt4,Sox12,Ttll5,Hhat,Cdc6,He…
GO:0045944	10,9,11,8,7	positive regulation of transcription from RNA polymerase II promoter	324	0.0221	29	0.0388	0.0011642	E	Il22,Hmgb2,Foxh1,Zmiz1,Mkl2,Nfkb1,Cbfb,Snw1,Nr4a3,Npas4,Sox9,Shh,Nkx2-2,Tef,Rxra,Nfix,Fubp3,Foxo3,Mafb,Mitf,Sox8,Irf1,Myf5,Vsx2,Ablim1,Sdpr,Ablim2,Cnbp,Epc1
GO:0032108	8,6,7	negative regulation of response to nutrient levels	5	0.0003	3	0.004	0.0011878	E	Lep,Cln3,Cartpt
GO:0032105	7,5,6	negative regulation of response to extracellular stimulus	5	0.0003	3	0.004	0.0011878	E	Lep,Cln3,Cartpt
GO:0045941	8,9,6,7	positive regulation of transcription	404	0.0276	34	0.0455	0.0013186	E	Il22,Hmgb2,Foxh1,Ebf3,Zmiz1,Mkl2,Nfkb1,Cbfb,Snw1,Nr4a3,Npas4,Sox9,Shh,Nkx2-2,Tef,Klf7,Rxra,Foxi1,Nfix,Fubp3,Foxo3,Mafb,Mitf,Sox8,Irf1,Myf5,Vsx2,Gtf2f1,Ablim1,Sdpr,Ablim2,Cnbp,Etv5,Epc1
GO:0009725	4	response to hormone stimulus	103	0.007	13	0.0174	0.0014592	E	Trh,Hmgb2,Lep,Sgk1,Wdtc1,Socs3,Akt3,Grb10,Gsk3a,Irs2,Ptpn1,Acvr1c,Ghrhr
GO:0034103	5,4	regulation of tissue remodeling	56	0.0038	9	0.012	0.0014712	E	Jund,Apc,Smurf1,Sox9,B4galt1,Wnt7b,Cartpt,P2rx7,Tob2
GO:0045893	9,8,10,7,6	positive regulation of transcription, DNA-dependent	361	0.0246	31	0.0415	0.0015083	E	Il22,Hmgb2,Foxh1,Zmiz1,Mkl2,Nfkb1,Cbfb,Snw1,Nr4a3,Npas4,Sox9,Shh,Nkx2-2,Tef,Klf7,Rxra,Foxi1,Nfix,Fubp3,Foxo3,Mafb,Mitf,Sox8,Irf1,Myf5,Vsx2,Ablim1,Sdpr,Ablim2,Cnbp,Epc1
GO:0051254	8,7,6,5	positive regulation of RNA metabolic process	362	0.0247	31	0.0415	0.001567	E	Il22,Hmgb2,Foxh1,Zmiz1,Mkl2,Nfkb1,Cbfb,Snw1,Nr4a3,Npas4,Sox9,Shh,Nkx2-2,Tef,Klf7,Rxra,Foxi1,Nfix,Fubp3,Foxo3,Mafb,Mitf,Sox8,Irf1,Myf5,Vsx2,Ablim1,Sdpr,Ablim2,Cnbp,Epc1
GO:0031325	6,4,5	positive regulation of cellular metabolic process	537	0.0366	42	0.0562	0.0015823	E	Il22,Hmgb2,Foxh1,Ebf3,Zmiz1,Mkl2,Apc,Nfkb1,Cbfb,Snw1,Nr4a3,Npas4,Sox9,Shh,Nkx2-2,Tef,Npm1,Klf7,Rxra,Foxi1,Nfix,P2rx7,Cln6,Fubp3,Foxo3,Mafb,Mitf,Sox8,Irf1,Myf5,Vsx2,Gtf2f1,Atg10,Ablim1,Sdpr,Ablim2,Cnbp,Arpc2,Adora2a,Etv5,Ghrh,Epc1
GO:0043933	3	macromolecular complex subunit organization	364	0.0248	31	0.0415	0.0016899	E	Tuba1a,Capzb,Capg,Tspyl4,Tbpl1,Pick1,Apc,Capza2,Clec2i,Fech,Npm1,H2afz,Hist1h4j,Myst4,H2afy2,P2rx7,Diap1,Ache,Hist1h2ah,Ipo4,Tuba1b,Olfm1,Tbce,Tubb2b,Arpc2,Tubb3,Kcnma1,Evl,H3f3b,Gtf2a1,Actr3b
GO:0034645	5	cellular macromolecule biosynthetic process	2761	0.1883	167	0.2236	0.001691	E	Scgb1a1,Suv420h2,Cbx7,Rybp,Papolb,L3mbtl2,Zfp455,Eif4e3,Il22,Rere,Tcea3,Hmgb2,Dpm2,Phrf1,Foxh1,Zfpm1,Ebf3,Jund,Zfp36l1,Tbpl1,Zmiz1,Hinfp,Gins2,Mkl2,Ahctf1,Nmt1,Kcnip3,Tcea2,Cbfa2t3,Chd9,Klf10,Nfkb1,Cbfb,Zfp157,Rpl7,Dazl,Nfkbia,Eef1g,Snw1,Nr4a3,Pigv,Ssbp2,Eif2c2,Ezh2,Ebf4,Arid3b,Sap30l,Zfp759,Npas4,Aimp1,Hmx1,Pitx1,Klf3,Ppp1r15b,Wdtc1,Clec2i,Isx,Xab2,Sox1,Trim27,Cyld,Sirt4,Sox12,Ttll5,Hhat,Cdc6,He…
GO:0010628	7,5,6	positive regulation of gene expression	413	0.0282	34	0.0455	0.0018145	E	Il22,Hmgb2,Foxh1,Ebf3,Zmiz1,Mkl2,Nfkb1,Cbfb,Snw1,Nr4a3,Npas4,Sox9,Shh,Nkx2-2,Tef,Klf7,Rxra,Foxi1,Nfix,Fubp3,Foxo3,Mafb,Mitf,Sox8,Irf1,Myf5,Vsx2,Gtf2f1,Ablim1,Sdpr,Ablim2,Cnbp,Etv5,Epc1
GO:0034622	5,4	cellular macromolecular complex assembly	276	0.0188	25	0.0335	0.0019684	E	Tuba1a,Capzb,Capg,Tspyl4,Tbpl1,Pick1,Apc,Capza2,Clec2i,H2afz,Hist1h4j,Myst4,H2afy2,Diap1,Hist1h2ah,Ipo4,Tuba1b,Tbce,Tubb2b,Arpc2,Tubb3,Evl,H3f3b,Gtf2a1,Actr3b
GO:0010579	12,13,11,8,10,14	positive regulation of adenylate cyclase activity by G-protein signaling pathway	28	0.0019	6	0.008	0.0020647	E	Tshr,Drd5,Adora2a,Oprd1,Ghrh,Ghrhr
GO:0010578	11,12,10,7,9,13	regulation of adenylate cyclase activity involved in G-protein signaling	28	0.0019	6	0.008	0.0020647	E	Tshr,Drd5,Adora2a,Oprd1,Ghrh,Ghrhr
GO:0007189	13,14,10,12,11,9,15	activation of adenylate cyclase activity by G-protein signaling pathway	28	0.0019	6	0.008	0.0020647	E	Tshr,Drd5,Adora2a,Oprd1,Ghrh,Ghrhr
GO:0032271	8,7,6,5	regulation of protein polymerization	48	0.0033	8	0.0107	0.0020827	E	Capzb,Capg,Apc,Capza2,Clec2i,Arpc2,Evl,Actr3b
GO:0043254	6,5,4	regulation of protein complex assembly	48	0.0033	8	0.0107	0.0020827	E	Capzb,Capg,Apc,Capza2,Clec2i,Arpc2,Evl,Actr3b
GO:0031328	7,5,6	positive regulation of cellular biosynthetic process	466	0.0318	37	0.0495	0.0021442	E	Il22,Hmgb2,Foxh1,Ebf3,Zmiz1,Mkl2,Nfkb1,Cbfb,Snw1,Nr4a3,Npas4,Sox9,Shh,Nkx2-2,Tef,Npm1,Klf7,Rxra,Foxi1,Nfix,Fubp3,Foxo3,Mafb,Mitf,Sox8,Irf1,Myf5,Vsx2,Gtf2f1,Ablim1,Sdpr,Ablim2,Cnbp,Adora2a,Etv5,Ghrh,Epc1
GO:0009889	5,4	regulation of biosynthetic process	2062	0.1407	128	0.1714	0.0021813	E	Scgb1a1,Suv420h2,Cbx7,Rybp,L3mbtl2,Eif4e3,Il22,Rere,Tcea3,Hmgb2,Lep,Foxh1,Zfpm1,Ebf3,Jund,Zfp36l1,Tbpl1,Zmiz1,Hinfp,Mkl2,Ahctf1,Kcnip3,Tcea2,Cbfa2t3,Chd9,Klf10,Nfkb1,Cbfb,Dazl,Nfkbia,Snw1,Nr4a3,Ssbp2,Eif2c2,Ezh2,Ebf4,Arid3b,Sap30l,Npas4,Hmx1,Pitx1,Klf3,Ppp1r15b,Wdtc1,Clec2i,Isx,Sox1,Trim27,Sirt4,Sox12,Hexim1,Sox9,Nfatc1,Dedd2,Fech,Shh,Nkx2-2,Zfp687,E2f6,Klf11,Tef,Tle3,Npm1,Timeless,Klf7,Rxra,Zfp1…
GO:0048523	5,3,4	negative regulation of cellular process	1007	0.0687	69	0.0924	0.0022321	E	Scgb1a1,Capzb,Rybp,Ifi30,Foxh1,Capg,Zfpm1,Nrp1,Kcnip3,Apc,Nfkb1,Nfkbia,Snw1,Rgs4,Capza2,Ezh2,Hmx1,Wdtc1,Kras,Arap3,Trim27,Sirt4,Socs3,Tmbim6,Sox9,B4galt1,Cln3,Shh,Nkx2-2,Klf11,Rgs2,Npm1,Cartpt,Timeless,Tbx2,Eef1a2,Purb,Xrcc4,Ncor2,P2rx7,Vegfa,Asph,Mitf,Grb10,Lhx4,Vsx2,Bag3,Dad1,Apbb3,Hlx,Drd5,Stxbp1,Ada,Eid1,Cd9,Dkk1,Nphp3,Acvr1c,Dnajb6,Skp2,Notch3,Adora2a,Dkk4,Pik3r1,Ddit4,Irf2bp2,Tob2,Evl,Epc1
GO:0051153	7,6,9,8,10	regulation of striated muscle cell differentiation	6	0.0004	3	0.004	0.002255	E	Ezh2,Shh,Epc1
GO:0009891	6,4,5	positive regulation of biosynthetic process	468	0.0319	37	0.0495	0.002282	E	Il22,Hmgb2,Foxh1,Ebf3,Zmiz1,Mkl2,Nfkb1,Cbfb,Snw1,Nr4a3,Npas4,Sox9,Shh,Nkx2-2,Tef,Npm1,Klf7,Rxra,Foxi1,Nfix,Fubp3,Foxo3,Mafb,Mitf,Sox8,Irf1,Myf5,Vsx2,Gtf2f1,Ablim1,Sdpr,Ablim2,Cnbp,Adora2a,Etv5,Ghrh,Epc1
GO:0044267	6,5	cellular protein metabolic process	2121	0.1447	131	0.1754	0.0023044	E	Suv420h2,Capzb,Rngtt,Eif4e3,Ttll11,Il22,Dpm2,Fbxo2,Ube4b,Aurkb,4931440F15Rik,Capg,Zfp36l1,Mamdc2,Nmt1,Camk1d,Apc,Sgk1,Fzr1,Smurf1,Rpl7,Dazl,Eef1g,Mst1r,Pigv,Eif2c2,Capza2,Ndufs4,Ezh2,Tor3a,Aimp1,Ppp1r15b,Clec2i,Cyld,Sirt4,Socs3,Ttll5,Sik1,Hhat,Ppap2a,B4galt1,Fech,Cln3,Eif2b5,Shh,Asb2,Akt3,Araf,Rpl7l1,Fbxl16,Pja2,Cartpt,Fbxo16,Ppp3cb,Prkar1a,Lars2,D8Ertd82e,Map1lc3a,Eef1a2,Tnrc6b,Ppil4,Myst4,P2rx7…
GO:0009966	6,5	regulation of signal transduction	501	0.0342	39	0.0522	0.0023194	E	Ralgds,Cyth1,Il22,Arhgef15,Spred2,Apc,Rasgrp1,Nfkbia,Rgs4,Kras,Rasa2,Arap3,Iqsec1,Socs3,Rgs2,Npm1,Agap1,Vav2,Arhgef7,Iqgap1,P2rx7,Ache,Asap3,Garnl3,Grb10,Arhgef3,Aplp2,Rasa3,Cbs,Ada,Gapvd1,Fbxo8,Cyth3,Dkk1,Arhgef1,Skp2,Dkk4,Ddit4,Ghrhr
GO:0016071	7,6	mRNA metabolic process	280	0.0191	25	0.0335	0.0023336	E	Scgb1a1,Papolb,Rngtt,Phrf1,Prpf18,Zfp36l1,Ppp4r2,Snw1,Dcps,Xab2,1500002O20Rik,Kin,Hnrnph1,Npm1,Skiv2l2,Ptcd2,Zfp36l2,1110037F02Rik,Isy1,Lsm4,Bat1a,Hnrpll,Tsen54,Smg7,Cwc22
GO:0002761	7,6,9,10,8,5	regulation of myeloid leukocyte differentiation	29	0.002	6	0.008	0.0024715	E	Apc,Klf10,Cartpt,Mitf,Pik3r1,Tob2
GO:0010468	6,5	regulation of gene expression	2019	0.1377	125	0.1673	0.0025633	E	Scgb1a1,Suv420h2,Cbx7,Rybp,L3mbtl2,Eif4e3,Il22,Rere,Tcea3,Ifi30,Hmgb2,Foxh1,Zfpm1,Ebf3,Jund,Zfp36l1,Tbpl1,Zmiz1,Hinfp,Mkl2,Ahctf1,Kcnip3,Tcea2,Cbfa2t3,Chd9,Klf10,Nfkb1,Cbfb,Dazl,Nfkbia,Snw1,Nr4a3,Ssbp2,Eif2c2,Ezh2,Ebf4,Arid3b,Sap30l,Npas4,Hmx1,Pitx1,Klf3,Ppp1r15b,Wdtc1,Isx,Sox1,Trim27,Sirt4,Sox12,Hexim1,Sox9,Nfatc1,Dedd2,Fech,Cln3,Shh,Nkx2-2,Zfp687,E2f6,Klf11,Tef,Tle3,Npm1,Timeless,Ptcd2,Klf7,Rxr…
GO:0060516	7,8,9,10,6	primary prostatic bud elongation	2	0.0001	2	0.0027	0.0025935	E	Sox9,Shh
GO:0051295	7,5,4,6	establishment of meiotic spindle localization	2	0.0001	2	0.0027	0.0025935	E	Fmn2,Myh9
GO:0032096	9,7,8	negative regulation of response to food	2	0.0001	2	0.0027	0.0025935	E	Lep,Cartpt
GO:0032099	10,5,8,9,7	negative regulation of appetite	2	0.0001	2	0.0027	0.0025935	E	Lep,Cartpt
GO:0002521	5,7,8,6	leukocyte differentiation	179	0.0122	18	0.0241	0.0025972	E	Dclre1c,Cd83,Apc,Cbfa2t3,Klf10,Cbfb,Shh,Cartpt,Ppp3cb,Il11ra1,Xrcc4,Tshr,Mitf,Irf1,Hlx,Ada,Pik3r1,Tob2
GO:0031326	6,5	regulation of cellular biosynthetic process	2058	0.1404	127	0.17	0.0026447	E	Scgb1a1,Suv420h2,Cbx7,Rybp,L3mbtl2,Eif4e3,Il22,Rere,Tcea3,Hmgb2,Lep,Foxh1,Zfpm1,Ebf3,Jund,Zfp36l1,Tbpl1,Zmiz1,Hinfp,Mkl2,Ahctf1,Kcnip3,Tcea2,Cbfa2t3,Chd9,Klf10,Nfkb1,Cbfb,Dazl,Nfkbia,Snw1,Nr4a3,Ssbp2,Eif2c2,Ezh2,Ebf4,Arid3b,Sap30l,Npas4,Hmx1,Pitx1,Klf3,Ppp1r15b,Wdtc1,Clec2i,Isx,Sox1,Trim27,Sirt4,Sox12,Hexim1,Sox9,Nfatc1,Dedd2,Fech,Shh,Nkx2-2,Zfp687,E2f6,Klf11,Tef,Tle3,Npm1,Timeless,Klf7,Rxra,Zfp1…
GO:0030041	8,7,6,5	actin filament polymerization	50	0.0034	8	0.0107	0.002671	E	Capzb,Capg,Capza2,Clec2i,Diap1,Arpc2,Evl,Actr3b
GO:0048522	5,3,4	positive regulation of cellular process	1069	0.0729	72	0.0964	0.0026877	E	Il22,Hmgb2,Nnat,Lep,Foxh1,Ebf3,Jund,Cd83,Zmiz1,Mkl2,Apc,Klf10,Nfkb1,Cbfb,Dazl,Snw1,Nr4a3,Npas4,Fasl,Kras,Socs3,Naif1,Sox9,B4galt1,Wnt7b,Shh,Nkx2-2,Mdm4,Tef,Npm1,Cadm1,Klf7,Rxra,Ppp3cb,Efhc1,Foxi1,Il11ra1,Xrcc4,Nfix,P2rx7,Traf5,Vegfa,Cln6,Fubp3,Foxo3,Mafb,Mitf,Sox8,Irf1,Myf5,Vsx2,Gtf2f1,Atg10,Ablim1,Hlx,Fbln2,Ada,Sdpr,Cyth3,Irs2,Ablim2,Cnbp,Acvr1c,Skp2,Arpc2,Adora2a,Pik3r1,Etv5,Ghrh,Ghrhr,Epc1,Il1…
GO:0051179	2	localization	2671	0.1822	160	0.2142	0.0027347	E	Rab4a,Syn3,Chmp6,Slc34a1,Slc25a39,Ap3s2,Mfi2,Rbp7,Rab18,Nnat,Lep,Eps15l1,Slc7a15,Tomm20,Arf2,Kcnc4,Fmnl1,Nrp1,Slc30a1,Kcnh6,Caly,Rab5b,Kcnip3,Nrp2,Pick1,Apc,Kcns2,Sgk1,Syngr1,Itpr1,Nfkbia,Ccr4,Fmn2,Katna1,Ndufs4,Slc32a1,Sv2c,Aimp1,Scn3b,Slc30a5,Ndufb4,Vdac3,Slit1,Atg4a,Cog7,Arap3,Tmed9,Sox1,Stx4a,Xcl1,Sirt4,Sec24c,Ergic1,Nfatc1,Golim4,B4galt1,Cln3,Hook2,Shh,Akt3,Podxl,Pex26,Abcc3,Lipc,Dst,Npm1,Ag…
GO:0007049	3	cell cycle	640	0.0437	47	0.0629	0.0027686	E	Cdc123,Bccip,Aurkb,Dlgap5,Oip5,Mad1l1,Apc,Fzr1,Dazl,Fmn2,Katna1,Mtus1,Sik1,Cdc6,Trp53bp2,Nfatc1,E2f6,Rgs2,Dst,Npm1,Timeless,Myh9,Pmp22,Cgref1,Tacc2,Sept5,Sesn2,Rbl2,Nek2,Kif11,Xrn1,Sept8,Ddit3,Katnb1,Chtf18,Eid1,Siah2,Hspa8,Skp2,Herc2,Nuf2,Cdc16,Thap1,Brsk1,E2f2,Mcm6,Appl2
GO:0046850	6,5	regulation of bone remodeling	51	0.0035	8	0.0107	0.0030077	E	Jund,Apc,Smurf1,Sox9,Wnt7b,Cartpt,P2rx7,Tob2
GO:0009893	5,3,4	positive regulation of metabolic process	560	0.0382	42	0.0562	0.0030371	E	Il22,Hmgb2,Foxh1,Ebf3,Zmiz1,Mkl2,Apc,Nfkb1,Cbfb,Snw1,Nr4a3,Npas4,Sox9,Shh,Nkx2-2,Tef,Npm1,Klf7,Rxra,Foxi1,Nfix,P2rx7,Cln6,Fubp3,Foxo3,Mafb,Mitf,Sox8,Irf1,Myf5,Vsx2,Gtf2f1,Atg10,Ablim1,Sdpr,Ablim2,Cnbp,Arpc2,Adora2a,Etv5,Ghrh,Epc1
GO:0030099	5,7,8,6	myeloid cell differentiation	127	0.0087	14	0.0187	0.003241	E	G6pdx,Lep,Apc,Cbfa2t3,Klf10,Cbfb,Nfkbia,Fech,Cartpt,Vegfa,Foxo3,Mitf,Pik3r1,Tob2
GO:0051252	7,6,5	regulation of RNA metabolic process	1782	0.1216	111	0.1486	0.0033153	E	Scgb1a1,Suv420h2,Cbx7,Rybp,L3mbtl2,Il22,Rere,Tcea3,Hmgb2,Foxh1,Zfpm1,Ebf3,Jund,Zfp36l1,Tbpl1,Zmiz1,Hinfp,Mkl2,Kcnip3,Tcea2,Cbfa2t3,Chd9,Klf10,Nfkb1,Cbfb,Snw1,Nr4a3,Ssbp2,Eif2c2,Ezh2,Ebf4,Arid3b,Sap30l,Npas4,Hmx1,Pitx1,Klf3,Wdtc1,Isx,Sox1,Trim27,Sirt4,Sox12,Hexim1,Sox9,Nfatc1,Dedd2,Shh,Nkx2-2,Zfp687,E2f6,Klf11,Tef,Tle3,Npm1,Timeless,Ptcd2,Klf7,Rxra,Zfp184,Tbx2,Zfp36l2,Foxi1,Zfp524,Nrbf2,Myst4,Purb…
GO:0030097	6,7,5	hemopoiesis	289	0.0197	25	0.0335	0.0033533	E	G6pdx,Lep,Dclre1c,Cd83,Apc,Cbfa2t3,Klf10,Cbfb,Nfkbia,Fech,Shh,Klf11,Cartpt,Ppp3cb,Il11ra1,Xrcc4,Tshr,Vegfa,Foxo3,Mitf,Irf1,Hlx,Ada,Pik3r1,Tob2
GO:0019219	6,5	regulation of nucleobase, nucleoside, nucleotide and nucleic acid metabolic process	1948	0.1329	120	0.1606	0.0033687	E	Scgb1a1,Suv420h2,Cbx7,Rybp,L3mbtl2,Il22,Rere,Tcea3,Hmgb2,Foxh1,Zfpm1,Ebf3,Jund,Zfp36l1,Tbpl1,Zmiz1,Hinfp,Mkl2,Ahctf1,Kcnip3,Tcea2,Cbfa2t3,Chd9,Klf10,Nfkb1,Cbfb,Nfkbia,Snw1,Nr4a3,Ssbp2,Eif2c2,Ezh2,Ebf4,Arid3b,Sap30l,Npas4,Hmx1,Pitx1,Klf3,Wdtc1,Isx,Sox1,Trim27,Sirt4,Sox12,Hexim1,Sox9,Nfatc1,Dedd2,Shh,Nkx2-2,Zfp687,E2f6,Klf11,Tef,Tle3,Npm1,Timeless,Ptcd2,Klf7,Rxra,Zfp184,Tbx2,Zfp36l2,Foxi1,Zfp524,Nr…
GO:0046883	6,7,5,8	regulation of hormone secretion	31	0.0021	6	0.008	0.0034526	E	Nnat,Lep,Sirt4,Acvr1c,Ghrh,Ghrhr
GO:0032228	8,9,7	regulation of synaptic transmission, GABAergic	7	0.0005	3	0.004	0.0037458	E	Kras,Stxbp1,Adora2a
GO:0031122	6,5	cytoplasmic microtubule organization	7	0.0005	3	0.004	0.0037458	E	Katna1,Dst,Tacc2
GO:0048518	4,2,3	positive regulation of biological process	1212	0.0827	79	0.1058	0.003755	E	Il22,Hmgb2,Nnat,Lep,Foxh1,Ebf3,Jund,Cd83,Zmiz1,Mkl2,Apc,Sgk1,Klf10,Nfkb1,Cbfb,Dazl,Nfkbia,Snw1,Nr4a3,Npas4,Clec2i,Fasl,Kras,Socs3,Naif1,Sox9,B4galt1,Wnt7b,Shh,Nkx2-2,Akt3,Mdm4,Tef,Npm1,Cadm1,Klf7,Rxra,Ppp3cb,Efhc1,Foxi1,Il11ra1,Xrcc4,Tshr,Nfix,P2rx7,Traf5,Vegfa,Cln6,Fubp3,Foxo3,F2r,Mafb,Mitf,Sox8,Irf1,Myf5,Vsx2,Gtf2f1,Atg10,Ablim1,Hlx,Fbln2,Ada,Sdpr,Cyth3,Irs2,Ablim2,Cnbp,Acvr1c,Skp2,Arpc2,Adora2…
GO:0006511	10,8,9	ubiquitin-dependent protein catabolic process	116	0.0079	13	0.0174	0.0038272	E	Fbxo2,Ube4b,Cyld,Shh,Edem3,Usp45,Usp36,Fbxo8,Siah2,Skp2,Uspl1,Psma6,Usp5
GO:0048771	3	tissue remodeling	90	0.0061	11	0.0147	0.0039306	E	Slc34a1,Jund,Apc,Smurf1,Sox9,B4galt1,Wnt7b,Cartpt,P2rx7,Mitf,Tob2
GO:0046851	7,5,6	negative regulation of bone remodeling	14	0.001	4	0.0054	0.0039806	E	Smurf1,Sox9,Cartpt,P2rx7
GO:0019226	5	transmission of nerve impulse	233	0.0159	21	0.0281	0.0041564	E	Syn3,Pick1,Sv2c,Vdac3,Kras,Stx4a,Cln3,Th,Cartpt,Scn1a,Pmp22,P2rx7,Ache,Snap25,Chrna1,Drd5,Stxbp1,Cd9,Adora2a,Kcnma1,Cldn11
GO:0051493	6,5	regulation of cytoskeleton organization	78	0.0053	10	0.0134	0.0041588	E	Capzb,Capg,Apc,Capza2,Clec2i,Dst,Npm1,Arpc2,Evl,Actr3b
GO:0014706	7,8,6	striated muscle tissue development	145	0.0099	15	0.0201	0.0041698	E	Tcap,Mkl2,Ezh2,Pdlim3,Pitx1,Kras,Shh,Flnb,Rxra,Myh9,Tbx2,Myf5,Chrna1,Hlx,Epc1
GO:0022402	4,3	cell cycle process	377	0.0257	30	0.0402	0.0045529	E	Cdc123,Aurkb,Oip5,Mad1l1,Apc,Fzr1,Dazl,Fmn2,Katna1,Cdc6,Nfatc1,E2f6,Dst,Npm1,Timeless,Myh9,Pmp22,Cgref1,Tacc2,Sesn2,Nek2,Kif11,Xrn1,Ddit3,Katnb1,Skp2,Herc2,Nuf2,Cdc16,Brsk1
GO:0008154	5,7,6,4	actin polymerization or depolymerization	55	0.0038	8	0.0107	0.0046726	E	Capzb,Capg,Capza2,Clec2i,Diap1,Arpc2,Evl,Actr3b
GO:0006412	7,5,6	translation	362	0.0247	29	0.0388	0.0047224	E	Eif4e3,Zfp36l1,Rpl7,Dazl,Eef1g,Eif2c2,Aimp1,Ppp1r15b,Cyld,Fech,Eif2b5,Rpl7l1,Lars2,Eef1a2,Tnrc6b,Mrps6,Nars2,Rpl29,Uba52,Tnrc6a,Rps21,Mrps18a,Rpl35a,Mrpl47,Abtb1,Rpl37a,Gspt1,Yars,Mrpl33
GO:0030833	9,8,7,10,6	regulation of actin filament polymerization	44	0.003	7	0.0094	0.0048809	E	Capzb,Capg,Capza2,Clec2i,Arpc2,Evl,Actr3b
GO:0048534	5,6,4	hemopoietic or lymphoid organ development	315	0.0215	26	0.0348	0.0048892	E	G6pdx,Lep,Dclre1c,Cd83,Apc,Cbfa2t3,Klf10,Nfkb1,Cbfb,Nfkbia,Fech,Shh,Klf11,Cartpt,Ppp3cb,Il11ra1,Xrcc4,Tshr,Vegfa,Foxo3,Mitf,Irf1,Hlx,Ada,Pik3r1,Tob2
GO:0010604	6,4,5	positive regulation of macromolecule metabolic process	529	0.0361	39	0.0522	0.0049869	E	Il22,Hmgb2,Foxh1,Ebf3,Zmiz1,Mkl2,Apc,Nfkb1,Cbfb,Snw1,Nr4a3,Npas4,Sox9,Shh,Nkx2-2,Tef,Klf7,Rxra,Foxi1,Nfix,P2rx7,Cln6,Fubp3,Foxo3,Mafb,Mitf,Sox8,Irf1,Myf5,Vsx2,Gtf2f1,Atg10,Ablim1,Sdpr,Ablim2,Cnbp,Arpc2,Etv5,Epc1
GO:0034104	6,4,5	negative regulation of tissue remodeling	15	0.001	4	0.0054	0.0051527	E	Smurf1,Sox9,Cartpt,P2rx7
GO:0010557	7,5,6	positive regulation of macromolecule biosynthetic process	448	0.0306	34	0.0455	0.0053347	E	Il22,Hmgb2,Foxh1,Ebf3,Zmiz1,Mkl2,Nfkb1,Cbfb,Snw1,Nr4a3,Npas4,Sox9,Shh,Nkx2-2,Tef,Klf7,Rxra,Foxi1,Nfix,Fubp3,Foxo3,Mafb,Mitf,Sox8,Irf1,Myf5,Vsx2,Gtf2f1,Ablim1,Sdpr,Ablim2,Cnbp,Etv5,Epc1
GO:0007517	5,6	muscle organ development	194	0.0132	18	0.0241	0.0054644	E	Tcap,Mkl2,Utrn,Ezh2,Pdlim3,Pitx1,Kras,Shh,Flnb,Ptcd2,Rxra,Myh9,Tbx2,Dtnbp1,Myf5,Chrna1,Hlx,Epc1
GO:0016477	5,6,4	cell migration	271	0.0185	23	0.0308	0.0055148	E	Fmnl1,Nrp1,Nrp2,Apc,Ccr4,Katna1,Aimp1,Arap3,Sox1,B4galt1,Shh,Podxl,Vav2,Vegfa,Selplg,Flt1,Cckar,Ada,Il17b,Irs2,Pik3r1,Vcl,Bcar1
GO:0055082	6,4	cellular chemical homeostasis	225	0.0153	20	0.0268	0.0056302	E	Mfi2,Slc30a1,Itpr1,Wdtc1,Xcl1,Ctrc,Cln3,Cartpt,Efhc1,Scn1a,Pmp22,P2rx7,Cln6,Chrna1,Aplp2,Cd9,4930506M07Rik,Adora2a,Kcnma1,Cldn11
GO:0000288	10,9	nuclear-transcribed mRNA catabolic process, deadenylation-dependent decay	8	0.0005	3	0.004	0.005689	E	Zfp36l1,Dcps,Zfp36l2
GO:0006884	6,4	cell volume homeostasis	8	0.0005	3	0.004	0.005689	E	Npm1,P2rx7,Kcnma1
GO:0032094	6	response to food	8	0.0005	3	0.004	0.005689	E	Lep,Cartpt,Ghrh
GO:0048585	5,3,4	negative regulation of response to stimulus	57	0.0039	8	0.0107	0.0057159	E	Lep,Socs3,Cln3,Cartpt,Ppp3cb,Grb10,Ada,Adora2a
GO:0042692	5	muscle cell differentiation	82	0.0056	10	0.0134	0.0057456	E	Tcap,Mkl2,Ezh2,Pitx1,Kras,Shh,Rxra,Myh9,Tbx2,Epc1
GO:0030278	5,7,6,8,4	regulation of ossification	46	0.0031	7	0.0094	0.0061445	E	Jund,Apc,Smurf1,Sox9,Wnt7b,P2rx7,Tob2
GO:0007188	9,10,8	G-protein signaling, coupled to cAMP nucleotide second messenger	46	0.0031	7	0.0094	0.0061445	E	Tshr,Drd5,Gnai2,Adora2a,Oprd1,Ghrh,Ghrhr
GO:0000956	9,8	nuclear-transcribed mRNA catabolic process	25	0.0017	5	0.0067	0.0063718	E	Zfp36l1,Dcps,1500002O20Rik,Zfp36l2,Smg7
GO:0048468	4,5	cell development	765	0.0522	52	0.0696	0.0065083	E	Tcap,Ctf1,G6pdx,Lep,Jund,Tbpl1,Nrp1,Nrp2,Apc,Cbfb,Dazl,Ccr4,Katna1,Pitx1,Slit1,Fasl,Krt8,Sox1,Sox9,Nfatc1,B4galt1,Shh,Th,Nkx2-2,Dst,Ptcd2,Klf7,Myh9,Kcne1,Tacc2,Fancc,Xrcc4,Mtap1b,Vegfa,Foxo3,Sox8,Cckar,Lhx4,Vsx2,Chrna1,Ablim1,Stxbp1,Tssk6,Fscn2,Tbce,Notch3,Kcnma1,Brsk1,Evl,Dfna5,Ghrhr,Fndc3a
GO:0007040	5	lysosome organization	16	0.0011	4	0.0054	0.0065217	E	Cln3,Cln6,Tpp1,Acp2
GO:0007618	3,4	mating	16	0.0011	4	0.0054	0.0065217	E	Th,Drd5,Aplp2,Ada
GO:0006351	8,6,7	transcription, DNA-dependent	1781	0.1215	108	0.1446	0.0065767	E	Scgb1a1,Suv420h2,Cbx7,Rybp,L3mbtl2,Il22,Rere,Tcea3,Hmgb2,Phrf1,Foxh1,Zfpm1,Ebf3,Jund,Tbpl1,Zmiz1,Hinfp,Mkl2,Kcnip3,Tcea2,Cbfa2t3,Chd9,Klf10,Nfkb1,Cbfb,Snw1,Nr4a3,Ssbp2,Eif2c2,Ezh2,Ebf4,Arid3b,Sap30l,Npas4,Hmx1,Pitx1,Klf3,Wdtc1,Isx,Sox1,Trim27,Sirt4,Sox12,Hexim1,Sox9,Nfatc1,Dedd2,Shh,Nkx2-2,Zfp687,E2f6,Klf11,Tef,Tle3,Timeless,Klf7,Rxra,Zfp184,Tbx2,Foxi1,Zfp524,Nrbf2,Myst4,Purb,Ascc1,Ncor2,Nfix,Med…
GO:0034621	4,3	cellular macromolecular complex subunit organization	308	0.021	25	0.0335	0.0066159	E	Tuba1a,Capzb,Capg,Tspyl4,Tbpl1,Pick1,Apc,Capza2,Clec2i,H2afz,Hist1h4j,Myst4,H2afy2,Diap1,Hist1h2ah,Ipo4,Tuba1b,Tbce,Tubb2b,Arpc2,Tubb3,Evl,H3f3b,Gtf2a1,Actr3b
GO:0060537	6,7,5	muscle tissue development	154	0.0105	15	0.0201	0.0067568	E	Tcap,Mkl2,Ezh2,Pdlim3,Pitx1,Kras,Shh,Flnb,Rxra,Myh9,Tbx2,Myf5,Chrna1,Hlx,Epc1
GO:0006355	8,7,9,6	regulation of transcription, DNA-dependent	1766	0.1205	107	0.1432	0.0068522	E	Scgb1a1,Suv420h2,Cbx7,Rybp,L3mbtl2,Il22,Rere,Tcea3,Hmgb2,Foxh1,Zfpm1,Ebf3,Jund,Tbpl1,Zmiz1,Hinfp,Mkl2,Kcnip3,Tcea2,Cbfa2t3,Chd9,Klf10,Nfkb1,Cbfb,Snw1,Nr4a3,Ssbp2,Eif2c2,Ezh2,Ebf4,Arid3b,Sap30l,Npas4,Hmx1,Pitx1,Klf3,Wdtc1,Isx,Sox1,Trim27,Sirt4,Sox12,Hexim1,Sox9,Nfatc1,Dedd2,Shh,Nkx2-2,Zfp687,E2f6,Klf11,Tef,Tle3,Timeless,Klf7,Rxra,Zfp184,Tbx2,Foxi1,Zfp524,Nrbf2,Myst4,Purb,Ascc1,Ncor2,Nfix,Med24,Rbl…
GO:0032774	5,7,6	RNA biosynthetic process	1785	0.1218	108	0.1446	0.0068881	E	Scgb1a1,Suv420h2,Cbx7,Rybp,L3mbtl2,Il22,Rere,Tcea3,Hmgb2,Phrf1,Foxh1,Zfpm1,Ebf3,Jund,Tbpl1,Zmiz1,Hinfp,Mkl2,Kcnip3,Tcea2,Cbfa2t3,Chd9,Klf10,Nfkb1,Cbfb,Snw1,Nr4a3,Ssbp2,Eif2c2,Ezh2,Ebf4,Arid3b,Sap30l,Npas4,Hmx1,Pitx1,Klf3,Wdtc1,Isx,Sox1,Trim27,Sirt4,Sox12,Hexim1,Sox9,Nfatc1,Dedd2,Shh,Nkx2-2,Zfp687,E2f6,Klf11,Tef,Tle3,Timeless,Klf7,Rxra,Zfp184,Tbx2,Foxi1,Zfp524,Nrbf2,Myst4,Purb,Ascc1,Ncor2,Nfix,Med…
GO:0007190	12,13,8,11,14	activation of adenylate cyclase activity	36	0.0025	6	0.008	0.0070428	E	Tshr,Drd5,Adora2a,Oprd1,Ghrh,Ghrhr
GO:0048513	4,5	organ development	1641	0.1119	100	0.1339	0.0072334	E	Tcap,G6pdx,Hmgb2,Lep,Foxh1,Dclre1c,Zfpm1,Zfp36l1,Cd83,Zmiz1,Mkl2,Nrp1,Utrn,Nrp2,Apc,Cbfa2t3,Klf10,Nfkb1,Cbfb,Nfkbia,Nr4a3,Ezh2,Pdlim3,Pitx1,Fasl,Kras,Krt8,Sox1,Socs3,Hexim1,Trp53bp2,Sox9,Nfatc1,B4galt1,Fech,Wnt7b,Shh,Th,Nkx2-2,Flnb,Ankrd17,Klf11,Cartpt,Prph2,Timeless,Ptcd2,Rxra,Myh9,Ppp3cb,Prkar1a,Tbx2,Foxi1,Kcne1,Il11ra1,Tacc2,Xrcc4,Angpt4,Tshr,Ncor2,P2rx7,Mreg,Vegfa,Ache,Foxo3,Wnt3,Dtnbp1,Mafb,…
GO:0006350	7,5	transcription	2108	0.1438	125	0.1673	0.0073539	E	Scgb1a1,Suv420h2,Cbx7,Rybp,Papolb,L3mbtl2,Zfp455,Il22,Rere,Tcea3,Hmgb2,Phrf1,Foxh1,Zfpm1,Ebf3,Jund,Tbpl1,Zmiz1,Hinfp,Mkl2,Ahctf1,Kcnip3,Tcea2,Cbfa2t3,Chd9,Klf10,Nfkb1,Cbfb,Zfp157,Nfkbia,Snw1,Nr4a3,Ssbp2,Eif2c2,Ezh2,Ebf4,Arid3b,Sap30l,Zfp759,Npas4,Hmx1,Pitx1,Klf3,Wdtc1,Isx,Xab2,Sox1,Trim27,Sirt4,Sox12,Ttll5,Hexim1,Sox9,Nfatc1,Dedd2,Zfp84,Shh,Nkx2-2,Zfp687,E2f6,Klf11,Tef,Tle3,Timeless,Klf7,Rxra,Zfp…
GO:0032288	5,14,10,6,12,7,9	myelin assembly	3	0.0002	2	0.0027	0.0073849	E	Pmp22,Cd9
GO:0051293	6,5,4	establishment of spindle localization	3	0.0002	2	0.0027	0.0073849	E	Fmn2,Myh9
GO:0009120	7	deoxyribonucleoside metabolic process	3	0.0002	2	0.0027	0.0073849	E	Tbpl1,Ada
GO:0051313	8,7,4,6	attachment of spindle microtubules to chromosome	3	0.0002	2	0.0027	0.0073849	E	Apc,Nuf2
GO:0007132	10,8,7,9,6	meiotic metaphase I	3	0.0002	2	0.0027	0.0073849	E	Fmn2,Myh9
GO:0008608	9,8,5,7	attachment of spindle microtubules to kinetochore	3	0.0002	2	0.0027	0.0073849	E	Apc,Nuf2
GO:0051653	5	spindle localization	3	0.0002	2	0.0027	0.0073849	E	Fmn2,Myh9
GO:0008064	9,8,7,6,5	regulation of actin polymerization or depolymerization	48	0.0033	7	0.0094	0.0076181	E	Capzb,Capg,Capza2,Clec2i,Arpc2,Evl,Actr3b
GO:0008104	4	protein localization	756	0.0516	51	0.0683	0.0076447	E	Rab4a,Chmp6,Ap3s2,Rab18,Nnat,Tomm20,Arf2,Rab5b,Pick1,Apc,Sgk1,Syngr1,Nfkbia,Katna1,Atg4a,Cog7,Stx4a,Sec24c,Hook2,Shh,Pex26,Npm1,Agap1,Erbb2ip,Rab11a,Vps18,Snx25,Nup93,Stam2,P2rx7,Rab39b,Akap7,Ipo4,Ap3m2,Ap1m1,Nup54,Atg10,Cadm3,Tnrc6a,Stxbp1,Uso1,Gapvd1,Grip1,Exoc4,Rab31,Traf3ip2,Tnpo3,Nuf2,Ap4e1,Snx10,Tln2
GO:0044248	4	cellular catabolic process	828	0.0565	55	0.0736	0.0078096	E	Fbxo2,Ube4b,4931440F15Rik,Zfp36l1,Enpp7,Rpia,Fzr1,Smurf1,Pxdn,Dcps,Lonp1,Atg4a,Cyld,Socs3,Fh1,Cln3,Shh,Asb2,1500002O20Rik,Fbxl16,Pja2,Bcat1,Fbxo16,Map1lc3a,Zfp36l2,Edem3,Ache,Usp45,Cln6,Rnf34,Idh1,Fbxo46,Usp36,Wsb1,Wipi1,Asb8,Ido2,Phyh,Atg10,Aldoc,Dera,Ada,Oxct1,Ube2s,Fbxo8,Siah2,Ube2q1,Skp2,Uspl1,Smg7,Psma6,Herc2,Cdc16,Enc1,Usp5
GO:0030029	3	actin filament-based process	187	0.0128	17	0.0228	0.0078224	E	Tcap,Capzb,Capg,Fmnl1,Fmn2,Capza2,Pdlim3,Fat1,Clec2i,Kras,Daam1,Myh9,Diap1,Coro1c,Arpc2,Evl,Actr3b
GO:0031281	10,11,6,9,12	positive regulation of cyclase activity	37	0.0025	6	0.008	0.00798	E	Tshr,Drd5,Adora2a,Oprd1,Ghrh,Ghrhr
GO:0045762	11,12,7,10,13	positive regulation of adenylate cyclase activity	37	0.0025	6	0.008	0.00798	E	Tshr,Drd5,Adora2a,Oprd1,Ghrh,Ghrhr
GO:0051349	6	positive regulation of lyase activity	37	0.0025	6	0.008	0.00798	E	Tshr,Drd5,Adora2a,Oprd1,Ghrh,Ghrhr
GO:0032507	6,5,4	maintenance of protein location in cell	17	0.0012	4	0.0054	0.0080956	E	Apc,Tnrc6a,Nuf2,Tln2
GO:0045671	9,8,7,10,11,12	negative regulation of osteoclast differentiation	9	0.0006	3	0.004	0.0081001	E	Cartpt,Pik3r1,Tob2
GO:0002793	7,8,6,5	positive regulation of peptide secretion	9	0.0006	3	0.004	0.0081001	E	Nnat,Ghrh,Ghrhr
GO:0032107	7,6	regulation of response to nutrient levels	9	0.0006	3	0.004	0.0081001	E	Lep,Cln3,Cartpt
GO:0034654	5	nucleobase, nucleoside, nucleotide and nucleic acid biosynthetic process	9	0.0006	3	0.004	0.0081001	E	Umps,Qtrt1,Ada
GO:0051932	7,8	synaptic transmission, GABAergic	9	0.0006	3	0.004	0.0081001	E	Kras,Stxbp1,Adora2a
GO:0032104	6,5	regulation of response to extracellular stimulus	9	0.0006	3	0.004	0.0081001	E	Lep,Cln3,Cartpt
GO:0034404	6	nucleobase, nucleoside and nucleotide biosynthetic process	9	0.0006	3	0.004	0.0081001	E	Umps,Qtrt1,Ada
GO:0042592	4	homeostatic process	568	0.0387	40	0.0535	0.0083071	E	G6pdx,Mfi2,Dclre1c,Slc30a1,Apc,Itpr1,Wdtc1,Xcl1,Ctrc,Fech,Fh1,Cln3,Nhlrc2,Lipc,Npm1,Cartpt,Ppp3cb,Efhc1,Scn1a,Glrx5,Pmp22,Fancc,P2rx7,Vegfa,Cln6,Foxo3,F2r,Xrn1,Chrna1,Ddit3,Aplp2,Ada,Nxn,Cd9,4930506M07Rik,Txn2,Adora2a,Kcnma1,Ghrhr,Cldn11
GO:0045761	10,11,6,9,12	regulation of adenylate cyclase activity	49	0.0033	7	0.0094	0.0084376	E	Tshr,Drd5,Gnai2,Adora2a,Oprd1,Ghrh,Ghrhr
GO:0030832	8,7,5,6	regulation of actin filament length	49	0.0033	7	0.0094	0.0084376	E	Capzb,Capg,Capza2,Clec2i,Arpc2,Evl,Actr3b
GO:0007187	8,9,7	G-protein signaling, coupled to cyclic nucleotide second messenger	49	0.0033	7	0.0094	0.0084376	E	Tshr,Drd5,Gnai2,Adora2a,Oprd1,Ghrh,Ghrhr
GO:0030036	5,4	actin cytoskeleton organization	174	0.0119	16	0.0214	0.0086027	E	Tcap,Capzb,Capg,Fmnl1,Fmn2,Capza2,Pdlim3,Fat1,Clec2i,Kras,Daam1,Diap1,Coro1c,Arpc2,Evl,Actr3b
GO:0002520	5,3	immune system development	334	0.0228	26	0.0348	0.0089466	E	G6pdx,Lep,Dclre1c,Cd83,Apc,Cbfa2t3,Klf10,Nfkb1,Cbfb,Nfkbia,Fech,Shh,Klf11,Cartpt,Ppp3cb,Il11ra1,Xrcc4,Tshr,Vegfa,Foxo3,Mitf,Irf1,Hlx,Ada,Pik3r1,Tob2
GO:0010556	6,5	regulation of macromolecule biosynthetic process	1979	0.135	117	0.1566	0.0090993	E	Scgb1a1,Suv420h2,Cbx7,Rybp,L3mbtl2,Eif4e3,Il22,Rere,Tcea3,Hmgb2,Foxh1,Zfpm1,Ebf3,Jund,Zfp36l1,Tbpl1,Zmiz1,Hinfp,Mkl2,Ahctf1,Kcnip3,Tcea2,Cbfa2t3,Chd9,Klf10,Nfkb1,Cbfb,Dazl,Nfkbia,Snw1,Nr4a3,Ssbp2,Eif2c2,Ezh2,Ebf4,Arid3b,Sap30l,Npas4,Hmx1,Pitx1,Klf3,Ppp1r15b,Wdtc1,Clec2i,Isx,Sox1,Trim27,Sirt4,Sox12,Hexim1,Sox9,Nfatc1,Dedd2,Fech,Shh,Nkx2-2,Zfp687,E2f6,Klf11,Tef,Tle3,Timeless,Klf7,Rxra,Zfp184,Tbx2,F…
GO:0045595	5,4	regulation of cell differentiation	335	0.0229	26	0.0348	0.0092112	E	Lep,Jund,Cd83,Nrp1,Apc,Klf10,Nfkbia,Ezh2,Socs3,Sik1,Sox9,B4galt1,Wnt7b,Shh,Nkx2-2,Cartpt,Xrcc4,Foxo3,Mitf,Hlx,Ada,Nphp3,Notch3,Pik3r1,Tob2,Epc1
GO:0007015	6,5	actin filament organization	89	0.0061	10	0.0134	0.0094974	E	Capzb,Capg,Capza2,Pdlim3,Fat1,Clec2i,Diap1,Arpc2,Evl,Actr3b
GO:0007033	4	vacuole organization	18	0.0012	4	0.0054	0.0098805	E	Cln3,Cln6,Tpp1,Acp2
GO:0010648	6,4,5	negative regulation of cell communication	147	0.01	14	0.0187	0.0098941	E	Apc,Nfkbia,Rgs4,Arap3,Socs3,Cln3,Rgs2,P2rx7,Grb10,Drd5,Stxbp1,Dkk1,Dkk4,Ddit4
GO:0050900	6,3,7,5	leukocyte migration	39	0.0027	6	0.008	0.0100928	E	Aimp1,B4galt1,Podxl,Selplg,Ada,Il17b
GO:0051146	6,8,9,7	striated muscle cell differentiation	39	0.0027	6	0.008	0.0100928	E	Tcap,Ezh2,Kras,Shh,Rxra,Epc1
GO:0051339	5	regulation of lyase activity	51	0.0035	7	0.0094	0.0102492	E	Tshr,Drd5,Gnai2,Adora2a,Oprd1,Ghrh,Ghrhr
GO:0031279	9,10,5,8,11	regulation of cyclase activity	51	0.0035	7	0.0094	0.0102492	E	Tshr,Drd5,Gnai2,Adora2a,Oprd1,Ghrh,Ghrhr
GO:0051239	4,3	regulation of multicellular organismal process	666	0.0454	45	0.0602	0.0102514	E	Scgb1a1,G6pdx,Lep,Jund,Cd83,Nrp1,Apc,Klf10,Nfkb1,Smurf1,Nfkbia,Ezh2,Clec2i,Kras,Sox9,B4galt1,Wnt7b,Shh,Th,Nkx2-2,Cartpt,Rxra,Xrcc4,Tshr,P2rx7,Foxo3,F2r,Mitf,Irf1,Hlx,Drd5,Stxbp1,Ada,Anxa5,Acvr1c,Notch3,Gnai2,Adora2a,Pik3r1,Kcnma1,Tob2,Etv5,Ghrh,Ghrhr,Epc1
GO:0010605	6,4,5	negative regulation of macromolecule metabolic process	457	0.0312	33	0.0442	0.0102618	E	Scgb1a1,Capzb,Rybp,Foxh1,Capg,Zfpm1,Kcnip3,Apc,Nfkb1,Snw1,Eif2c2,Capza2,Hmx1,Wdtc1,Trim27,Sirt4,Sox9,Cln3,Shh,Klf11,Npm1,Timeless,Tbx2,Tnrc6b,Purb,Ncor2,Tnrc6a,Eid1,Dnajb6,Skp2,Irf2bp2,Evl,Epc1
GO:0033036	3	macromolecule localization	791	0.054	52	0.0696	0.0103315	E	Rab4a,Chmp6,Ap3s2,Rab18,Nnat,Tomm20,Arf2,Rab5b,Pick1,Apc,Sgk1,Syngr1,Nfkbia,Katna1,Atg4a,Cog7,Stx4a,Sec24c,Hook2,Shh,Pex26,Npm1,Agap1,Erbb2ip,Rab11a,Vps18,Snx25,Nup93,Stam2,P2rx7,Rab39b,Akap7,Ipo4,Ap3m2,Ap1m1,Nup54,Atg10,Cadm3,Tnrc6a,Stxbp1,Uso1,Gapvd1,Grip1,Exoc4,Rab31,Traf3ip2,Acvr1c,Tnpo3,Nuf2,Ap4e1,Snx10,Tln2
GO:0007268	5,6	synaptic transmission	194	0.0132	17	0.0228	0.0104563	E	Syn3,Pick1,Sv2c,Vdac3,Kras,Stx4a,Cln3,Th,Cartpt,P2rx7,Ache,Snap25,Chrna1,Drd5,Stxbp1,Adora2a,Kcnma1
GO:0010926	2	anatomical structure formation	775	0.0529	51	0.0683	0.0106626	E	Tcap,Tuba1a,Capzb,Capg,Tspyl4,Tbpl1,Baiap2,Nrp1,Pick1,Apc,Nr4a3,Capza2,Nefh,Clec2i,B4galt1,Fech,Shh,Npm1,Myh9,Vav2,Prkar1a,Tbx2,H2afz,Pmp22,Hist1h4j,Myst4,H2afy2,P2rx7,Vegfa,Diap1,Ache,Hist1h2ah,Wnt3,Ipo4,Tuba1b,Flt1,Ada,Cd9,Olfm1,Coro1c,Scg2,Tbce,Tubb2b,Arpc2,Tubb3,Vcl,Kcnma1,Evl,H3f3b,Gtf2a1,Actr3b
GO:0002376	2	immune system process	794	0.0542	52	0.0696	0.0108527	E	Scgb1a1,G6pdx,Il22,Ifi30,Lep,Dclre1c,Cd83,Apc,Cbfa2t3,Ccr7,Klf10,Nfkb1,Cbfb,Nfkbia,Ccr4,Aimp1,Clec2i,Fasl,Xcl1,B4galt1,Fech,Shh,Podxl,Klf11,Cartpt,Cadm1,Myh9,Ppp3cb,Il11ra1,Fancc,Xrcc4,Tshr,P2rx7,Mr1,Vegfa,Selplg,Foxo3,Mitf,Irf1,Tlr5,Mif,Hlx,Sit1,Ada,Il17b,Traf3ip2,Adora2a,Gbp3,Pik3r1,Aire,Tob2,Il12b
GO:0045449	7,8,6	regulation of transcription	1847	0.126	109	0.1459	0.010903	E	Scgb1a1,Suv420h2,Cbx7,Rybp,L3mbtl2,Il22,Rere,Tcea3,Hmgb2,Foxh1,Zfpm1,Ebf3,Jund,Tbpl1,Zmiz1,Hinfp,Mkl2,Ahctf1,Kcnip3,Tcea2,Cbfa2t3,Chd9,Klf10,Nfkb1,Cbfb,Nfkbia,Snw1,Nr4a3,Ssbp2,Eif2c2,Ezh2,Ebf4,Arid3b,Sap30l,Npas4,Hmx1,Pitx1,Klf3,Wdtc1,Isx,Sox1,Trim27,Sirt4,Sox12,Hexim1,Sox9,Nfatc1,Dedd2,Shh,Nkx2-2,Zfp687,E2f6,Klf11,Tef,Tle3,Timeless,Klf7,Rxra,Zfp184,Tbx2,Foxi1,Zfp524,Nrbf2,Myst4,Purb,Ascc1,Ncor2,…
GO:0007617	4,5	mating behavior	10	0.0007	3	0.004	0.0109839	E	Th,Drd5,Aplp2
GO:0002762	8,7,6,9,10,11	negative regulation of myeloid leukocyte differentiation	10	0.0007	3	0.004	0.0109839	E	Cartpt,Pik3r1,Tob2
GO:0007507	5,6	heart development	211	0.0144	18	0.0241	0.0110024	E	Tcap,Foxh1,Zfpm1,Zmiz1,Mkl2,Nrp1,Nrp2,Pdlim3,Hexim1,Trp53bp2,Sox9,Nfatc1,Shh,Th,Ptcd2,Rxra,Ppp3cb,Tbx2
GO:0009892	5,3,4	negative regulation of metabolic process	478	0.0326	34	0.0455	0.0111873	E	Scgb1a1,Capzb,Rybp,Foxh1,Capg,Zfpm1,Kcnip3,Apc,Nfkb1,Snw1,Eif2c2,Capza2,Hmx1,Wdtc1,Trim27,Sirt4,Sox9,Cln3,Shh,Klf11,Npm1,Timeless,Gchfr,Tbx2,Tnrc6b,Purb,Ncor2,Tnrc6a,Eid1,Dnajb6,Skp2,Irf2bp2,Evl,Epc1
GO:0032535	4	regulation of cellular component size	52	0.0035	7	0.0094	0.0112435	E	Capzb,Capg,Capza2,Clec2i,Arpc2,Evl,Actr3b
GO:0019933	9,8	cAMP-mediated signaling	52	0.0035	7	0.0094	0.0112435	E	Tshr,Drd5,Gnai2,Adora2a,Oprd1,Ghrh,Ghrhr
GO:0030098	6,8,9,7,5	lymphocyte differentiation	135	0.0092	13	0.0174	0.011369	E	Dclre1c,Cd83,Apc,Cbfb,Shh,Ppp3cb,Il11ra1,Xrcc4,Tshr,Irf1,Hlx,Ada,Pik3r1
GO:0045597	6,5,4	positive regulation of cell differentiation	150	0.0102	14	0.0187	0.0113869	E	Lep,Jund,Cd83,Apc,Klf10,Socs3,Wnt7b,Shh,Nkx2-2,Xrcc4,Foxo3,Hlx,Ada,Epc1
GO:0006914	5	autophagy	29	0.002	5	0.0067	0.0115656	E	Atg4a,Cln3,Map1lc3a,Wipi1,Atg10
GO:0006325	5	establishment or maintenance of chromatin architecture	310	0.0211	24	0.0321	0.0116345	E	Suv420h2,Cbx7,L3mbtl2,Rere,Tspyl4,Chd9,Ezh2,H2afz,Hist1h4j,Myst4,H2afy2,Rbl2,Hist1h2ah,Prmt7,Smyd3,Gpx4,Smarcd1,Tssk6,Jmjd1c,Smarcal1,2410016O06Rik,H3f3b,Arid1a,Epc1
GO:0055086	5	nucleobase, nucleoside and nucleotide metabolic process	278	0.019	22	0.0295	0.0119835	E	G6pdx,Tbpl1,Rpia,Nt5c3,Lonp1,Umps,Atp5j2,Atp8a1,Qtrt1,Tshr,Mtap,Drd5,Dera,Ada,Gnai2,Adora2a,Oprd1,Qprt,Ampd3,Cda,Ghrh,Ghrhr
GO:0051276	4	chromosome organization	382	0.0261	28	0.0375	0.0131637	E	Suv420h2,Cbx7,L3mbtl2,Rere,Dclre1c,Tspyl4,Apc,Chd9,Ezh2,H2afz,Hist1h4j,Myst4,H2afy2,Rbl2,Hist1h2ah,Nek2,Prmt7,Xrn1,Smyd3,Gpx4,Smarcd1,Tssk6,Jmjd1c,Smarcal1,2410016O06Rik,H3f3b,Arid1a,Epc1
GO:0008286	9,8,6,7	insulin receptor signaling pathway	30	0.002	5	0.0067	0.0131748	E	Socs3,Grb10,Gsk3a,Irs2,Ptpn1
GO:0048878	5	chemical homeostasis	315	0.0215	24	0.0321	0.0133876	E	Mfi2,Slc30a1,Itpr1,Wdtc1,Xcl1,Ctrc,Fech,Cln3,Lipc,Cartpt,Efhc1,Scn1a,Pmp22,P2rx7,Cln6,Foxo3,Chrna1,Aplp2,Cd9,4930506M07Rik,Adora2a,Kcnma1,Ghrhr,Cldn11
GO:0030817	9,10,8,11	regulation of cAMP biosynthetic process	54	0.0037	7	0.0094	0.013414	E	Tshr,Drd5,Gnai2,Adora2a,Oprd1,Ghrh,Ghrhr
GO:0051253	8,7,6,5	negative regulation of RNA metabolic process	266	0.0181	21	0.0281	0.0137179	E	Scgb1a1,Rybp,Foxh1,Zfpm1,Kcnip3,Nfkb1,Hmx1,Wdtc1,Trim27,Sirt4,Sox9,Klf11,Npm1,Timeless,Tbx2,Purb,Ncor2,Eid1,Dnajb6,Irf2bp2,Epc1
GO:0007610	3	behavior	384	0.0262	28	0.0375	0.0138149	E	Trh,Lep,Kcnip3,Nrp2,Ccr7,Nr4a3,Ccr4,Vdac3,Kras,Xcl1,Cln3,Th,Cartpt,Hmgcr,Scn1a,Slc18a2,Tshr,Crhr1,Lsp1,Cln6,Drd5,Aplp2,Il17b,Epm2a,Tbce,Adora2a,Oprd1,Kcnma1
GO:0051235	4,3	maintenance of location	42	0.0029	6	0.008	0.013883	E	Apc,Xcl1,P2rx7,Tnrc6a,Nuf2,Tln2
GO:0060124	7,8,9,10,6,5,11	positive regulation of growth hormone secretion	4	0.0003	2	0.0027	0.0140191	E	Ghrh,Ghrhr
GO:0034453	7,6,5	microtubule anchoring	4	0.0003	2	0.0027	0.0140191	E	Apc,Nuf2
GO:0042455	8	ribonucleoside biosynthetic process	4	0.0003	2	0.0027	0.0140191	E	Qtrt1,Ada
GO:0032095	8,7	regulation of response to food	4	0.0003	2	0.0027	0.0140191	E	Lep,Cartpt
GO:0009163	7	nucleoside biosynthetic process	4	0.0003	2	0.0027	0.0140191	E	Qtrt1,Ada
GO:0032713	7,5,6	negative regulation of interleukin-4 production	4	0.0003	2	0.0027	0.0140191	E	Scgb1a1,Cd83
GO:0042451	8	purine nucleoside biosynthetic process	4	0.0003	2	0.0027	0.0140191	E	Qtrt1,Ada
GO:0051155	8,7,6,10,9,11	positive regulation of striated muscle cell differentiation	4	0.0003	2	0.0027	0.0140191	E	Shh,Epc1
GO:0046129	9	purine ribonucleoside biosynthetic process	4	0.0003	2	0.0027	0.0140191	E	Qtrt1,Ada
GO:0060737	6,7,8,9,5	prostate gland morphogenetic growth	4	0.0003	2	0.0027	0.0140191	E	Sox9,Shh
GO:0045779	6,8,9,7,4,5	negative regulation of bone resorption	4	0.0003	2	0.0027	0.0140191	E	Cartpt,P2rx7
GO:0015816	7,8,9	glycine transport	4	0.0003	2	0.0027	0.0140191	E	Slc32a1,Slc36a1
GO:0006651	7,8,9	diacylglycerol biosynthetic process	4	0.0003	2	0.0027	0.0140191	E	Ppap2a,Mogat2
GO:0051651	5,4,3	maintenance of location in cell	20	0.0014	4	0.0054	0.0140965	E	Apc,Tnrc6a,Nuf2,Tln2
GO:0045638	7,6,5,8,9,10	negative regulation of myeloid cell differentiation	20	0.0014	4	0.0054	0.0140965	E	Nfkbia,Cartpt,Pik3r1,Tob2
GO:0051693	10,11,9,8,12,7,6	actin filament capping	20	0.0014	4	0.0054	0.0140965	E	Capzb,Capg,Capza2,Evl
GO:0007223	8,7	Wnt receptor signaling pathway, calcium modulating pathway	20	0.0014	4	0.0054	0.0140965	E	Wnt7b,Wnt3,Wnt10a,Wnt2
GO:0006873	7,5	cellular ion homeostasis	218	0.0149	18	0.0241	0.0141217	E	Mfi2,Slc30a1,Itpr1,Xcl1,Ctrc,Cln3,Efhc1,Scn1a,Pmp22,P2rx7,Cln6,Chrna1,Aplp2,Cd9,4930506M07Rik,Adora2a,Kcnma1,Cldn11
GO:0051234	2,3	establishment of localization	2276	0.1553	130	0.174	0.0141961	E	Rab4a,Syn3,Chmp6,Slc34a1,Slc25a39,Ap3s2,Mfi2,Rbp7,Rab18,Nnat,Lep,Eps15l1,Slc7a15,Tomm20,Arf2,Kcnc4,Slc30a1,Kcnh6,Caly,Rab5b,Kcnip3,Pick1,Kcns2,Sgk1,Syngr1,Itpr1,Nfkbia,Fmn2,Ndufs4,Slc32a1,Sv2c,Scn3b,Slc30a5,Ndufb4,Vdac3,Slit1,Atg4a,Cog7,Tmed9,Stx4a,Xcl1,Sirt4,Sec24c,Ergic1,Nfatc1,Golim4,B4galt1,Cln3,Hook2,Shh,Akt3,Pex26,Abcc3,Lipc,Dst,Npm1,Agap1,Slc45a1,Erbb2ip,Rab11a,Slc3a2,Myh9,Atp5j2,Lrp11,Atp…
GO:0009119	7	ribonucleoside metabolic process	11	0.0008	3	0.004	0.0143359	E	Qtrt1,Ada,Cda
GO:0043488	9,8,7	regulation of mRNA stability	11	0.0008	3	0.004	0.0143359	E	Scgb1a1,Zfp36l1,Zfp36l2
GO:0046887	6,7,8,5,4,9	positive regulation of hormone secretion	11	0.0008	3	0.004	0.0143359	E	Nnat,Ghrh,Ghrhr
GO:0046636	10,9,8,7	negative regulation of alpha-beta T cell activation	11	0.0008	3	0.004	0.0143359	E	Shh,Hlx,Adora2a
GO:0006928	3,4	cell motion	403	0.0275	29	0.0388	0.014416	E	Fmnl1,Nrp1,Nrp2,Apc,Ccr4,Katna1,Aimp1,Slit1,Arap3,Sox1,B4galt1,Shh,Podxl,Klf7,Myh9,Vav2,Vegfa,Selplg,Flt1,Cckar,Lhx4,Ablim1,Ada,Il17b,Irs2,Pik3r1,Vcl,Evl,Bcar1
GO:0051674	3	localization of cell	403	0.0275	29	0.0388	0.014416	E	Fmnl1,Nrp1,Nrp2,Apc,Ccr4,Katna1,Aimp1,Slit1,Arap3,Sox1,B4galt1,Shh,Podxl,Klf7,Myh9,Vav2,Vegfa,Selplg,Flt1,Cckar,Lhx4,Ablim1,Ada,Il17b,Irs2,Pik3r1,Vcl,Evl,Bcar1
GO:0019935	8,7	cyclic-nucleotide-mediated signaling	55	0.0038	7	0.0094	0.0145914	E	Tshr,Drd5,Gnai2,Adora2a,Oprd1,Ghrh,Ghrhr
GO:0032956	7,6,5	regulation of actin cytoskeleton organization	55	0.0038	7	0.0094	0.0145914	E	Capzb,Capg,Capza2,Clec2i,Arpc2,Evl,Actr3b
GO:0001701	6,7	in utero embryonic development	252	0.0172	20	0.0268	0.014788	E	Zmiz1,Mkl2,Slc30a1,Nmt1,Wdtc1,Xab2,Krt8,Socs3,Wnt7b,Myh9,Xrcc4,Ncor2,Sox8,Dad1,Ada,Acvr1c,Dnajb6,Btf3,N4bp2l2,Wnt2
GO:0006402	8,7	mRNA catabolic process	31	0.0021	5	0.0067	0.0149117	E	Zfp36l1,Dcps,1500002O20Rik,Zfp36l2,Smg7
GO:0007568	3	aging	43	0.0029	6	0.008	0.0153164	E	Zmiz1,Tbx2,Xrn1,Mif,Kl,Ghrhr
GO:0006396	7,6,5	RNA processing	389	0.0265	28	0.0375	0.0155307	E	Papolb,Rngtt,Phrf1,Prpf18,Ppp4r2,Snw1,Larp7,Xab2,Kin,Hnrnph1,Npm1,Skiv2l2,Ptcd2,1110037F02Rik,Rg9mtd1,Qtrt1,Isy1,Gtpbp3,Xrn1,Nsun2,Utp23,Lsm4,Bat1a,Hnrpll,Tsen54,Cwc22,Naf1,Tyw3
GO:0030814	9,10,8	regulation of cAMP metabolic process	56	0.0038	7	0.0094	0.0158309	E	Tshr,Drd5,Gnai2,Adora2a,Oprd1,Ghrh,Ghrhr
GO:0032970	5,4	regulation of actin filament-based process	56	0.0038	7	0.0094	0.0158309	E	Capzb,Capg,Capza2,Clec2i,Arpc2,Evl,Actr3b
GO:0033043	5,4	regulation of organelle organization	112	0.0076	11	0.0147	0.0158357	E	Capzb,Capg,Apc,Capza2,Clec2i,Dst,Npm1,Arpc2,Herc2,Evl,Actr3b
GO:0010629	7,5,6	negative regulation of gene expression	339	0.0231	25	0.0335	0.0161015	E	Scgb1a1,Rybp,Foxh1,Zfpm1,Kcnip3,Nfkb1,Snw1,Eif2c2,Hmx1,Wdtc1,Trim27,Sirt4,Sox9,Klf11,Timeless,Tbx2,Tnrc6b,Purb,Ncor2,Tnrc6a,Eid1,Dnajb6,Skp2,Irf2bp2,Epc1
GO:0000278	4	mitotic cell cycle	255	0.0174	20	0.0268	0.0161918	E	Cdc123,Aurkb,Oip5,Mad1l1,Apc,Fzr1,Katna1,Sik1,Cdc6,Nfatc1,E2f6,Timeless,Nek2,Kif11,Katnb1,Skp2,Herc2,Nuf2,Cdc16,Brsk1
GO:0030835	8,7,9,11,10,6,5	negative regulation of actin filament depolymerization	21	0.0014	4	0.0054	0.0165296	E	Capzb,Capg,Capza2,Evl
GO:0050796	7,8,9,6,10	regulation of insulin secretion	21	0.0014	4	0.0054	0.0165296	E	Nnat,Lep,Sirt4,Acvr1c
GO:0008283	3	cell proliferation	622	0.0424	41	0.0549	0.0165375	E	Scgb1a1,Gng2,Ifi30,Zmiz1,Apc,Ifltd1,Nfkbia,Clec2i,Kras,Sox9,B4galt1,Shh,Mdm4,Npm1,Rxra,Prkar1a,Il11ra1,Purb,Tacc2,Xrcc4,Ncor2,P2rx7,Traf5,Vegfa,Asph,Rpl29,Mitf,Mif,Vsx2,Hlx,Ada,Irs2,Cd9,Cnbp,Acvr1c,Gnai2,Sparc,Ghrh,Ghrhr,Appl2,Il12b
GO:0006915	5	apoptosis	731	0.0499	47	0.0629	0.016618	E	Rybp,Rtkn,Camk1d,Kcnip3,Apc,Sgk1,Nfkb1,Fasl,Kras,Krt8,Tmbim6,Naif1,Trp53bp2,Sox9,Dedd2,B4galt1,Cln3,Klf11,Cadm1,Ppp3cb,Eef1a2,Efhc1,Purb,Xrcc4,P2rx7,Lsp1,Traf5,Vegfa,Rnf34,Foxo3,Mitf,Lhx4,Bag3,Ddit3,Dad1,Apbb3,Pdcl3,Ada,Siah2,Traf3ip2,Acvr1c,Skp2,Adora2a,Pik3r1,Ddit4,Wdr92,E2f2
GO:0044087	4,3	regulation of cellular component biogenesis	70	0.0048	8	0.0107	0.0166192	E	Capzb,Capg,Apc,Capza2,Clec2i,Arpc2,Evl,Actr3b
GO:0034962	6	cellular biopolymer catabolic process	551	0.0376	37	0.0495	0.0167495	E	Fbxo2,Ube4b,4931440F15Rik,Zfp36l1,Fzr1,Smurf1,Dcps,Cyld,Socs3,Shh,Asb2,1500002O20Rik,Fbxl16,Pja2,Fbxo16,Map1lc3a,Zfp36l2,Edem3,Usp45,Rnf34,Fbxo46,Usp36,Wsb1,Asb8,Atg10,Ube2s,Fbxo8,Siah2,Ube2q1,Skp2,Uspl1,Smg7,Psma6,Herc2,Cdc16,Enc1,Usp5
GO:0032102	6,4,5	negative regulation of response to external stimulus	32	0.0022	5	0.0067	0.0167767	E	Lep,Cln3,Cartpt,Ada,Adora2a
GO:0043242	6,7,4,5	negative regulation of protein complex disassembly	32	0.0022	5	0.0067	0.0167767	E	Capzb,Capg,Apc,Capza2,Evl
GO:0006401	7,6	RNA catabolic process	32	0.0022	5	0.0067	0.0167767	E	Zfp36l1,Dcps,1500002O20Rik,Zfp36l2,Smg7
GO:0051259	6,5	protein oligomerization	44	0.003	6	0.008	0.0168356	E	Pick1,Npm1,P2rx7,Ache,Olfm1,Kcnma1
GO:0022403	5,4	cell cycle phase	324	0.0221	24	0.0321	0.0169526	E	Cdc123,Aurkb,Oip5,Mad1l1,Apc,Fzr1,Dazl,Fmn2,Katna1,Cdc6,Nfatc1,E2f6,Timeless,Myh9,Tacc2,Nek2,Kif11,Xrn1,Katnb1,Skp2,Herc2,Nuf2,Cdc16,Brsk1
GO:0032879	4,3	regulation of localization	307	0.0209	23	0.0308	0.016958	E	Rab4a,Nnat,Lep,Nrp1,Rab5b,Apc,Sgk1,Arap3,Xcl1,Sirt4,B4galt1,Shh,Akt3,P2rx7,Grb10,Ada,Gapvd1,Irs2,Acvr1c,Pik3r1,Vcl,Ghrh,Ghrhr
GO:0006810	3,4	transport	2263	0.1544	128	0.1714	0.017102	E	Rab4a,Syn3,Chmp6,Slc34a1,Slc25a39,Ap3s2,Mfi2,Rbp7,Rab18,Nnat,Lep,Eps15l1,Slc7a15,Tomm20,Arf2,Kcnc4,Slc30a1,Kcnh6,Caly,Rab5b,Kcnip3,Pick1,Kcns2,Sgk1,Syngr1,Itpr1,Nfkbia,Ndufs4,Slc32a1,Sv2c,Scn3b,Slc30a5,Ndufb4,Vdac3,Atg4a,Cog7,Tmed9,Stx4a,Xcl1,Sirt4,Sec24c,Ergic1,Nfatc1,Golim4,B4galt1,Cln3,Hook2,Shh,Akt3,Pex26,Abcc3,Lipc,Dst,Npm1,Agap1,Slc45a1,Erbb2ip,Rab11a,Slc3a2,Myh9,Atp5j2,Lrp11,Atp8a1,Cnnm3,S…
GO:0002573	6,8,9,7	myeloid leukocyte differentiation	57	0.0039	7	0.0094	0.0171327	E	Apc,Cbfa2t3,Klf10,Cartpt,Mitf,Pik3r1,Tob2
GO:0019538	5,4	protein metabolic process	2592	0.1768	145	0.1941	0.0172237	E	Suv420h2,Capzb,Rngtt,Eif4e3,Ttll11,Il22,Ifi30,Cpvl,Dpm2,Fbxo2,Ube4b,Aurkb,4931440F15Rik,Capg,Zfp36l1,Mamdc2,Nmt1,Camk1d,Apc,Sgk1,Fzr1,Smurf1,Rpl7,Dazl,Eef1g,Mst1r,Pigv,Eif2c2,Capza2,Ndufs4,Ezh2,Tor3a,Aimp1,Lonp1,Ppp1r15b,Clec2i,Cyld,Sirt4,Socs3,Ttll5,Sik1,Hhat,Ctrc,Ppap2a,Dpp7,B4galt1,Fech,Cln3,Eif2b5,Shh,F7,Asb2,Akt3,Araf,Rpl7l1,Fbxl16,Pja2,Cartpt,Fbxo16,Ppp3cb,Prkar1a,Lars2,D8Ertd82e,Map1lc3a,E…
GO:0044265	5	cellular macromolecule catabolic process	608	0.0415	40	0.0535	0.0176702	E	Fbxo2,Ube4b,4931440F15Rik,Zfp36l1,Rpia,Fzr1,Smurf1,Dcps,Cyld,Socs3,Shh,Asb2,1500002O20Rik,Fbxl16,Pja2,Fbxo16,Map1lc3a,Zfp36l2,Edem3,Usp45,Cln6,Rnf34,Fbxo46,Usp36,Wsb1,Asb8,Atg10,Aldoc,Ube2s,Fbxo8,Siah2,Ube2q1,Skp2,Uspl1,Smg7,Psma6,Herc2,Cdc16,Enc1,Usp5
GO:0046942	5,6	carboxylic acid transport	71	0.0048	8	0.0107	0.0177809	E	Slc7a15,Slc32a1,Cln3,Abcc3,Slc3a2,Slc36a1,P2rx7,Slc7a5
GO:0008203	6,7,8	cholesterol metabolic process	71	0.0048	8	0.0107	0.0177809	E	Cyb5r3,Lep,Fech,Lipc,Hmgcr,Cyp11a1,Cln6,Hsd17b7
GO:0051085	10,9	chaperone mediated protein folding requiring cofactor	12	0.0008	3	0.004	0.0181436	E	Tor3a,Tor1b,Hspa8
GO:0001508	9,7	regulation of action potential	45	0.0031	6	0.008	0.0184408	E	Cln3,Scn1a,Pmp22,Cd9,Kcnma1,Cldn11
GO:0006865	5,6,7	amino acid transport	58	0.004	7	0.0094	0.0184969	E	Slc7a15,Slc32a1,Cln3,Slc3a2,Slc36a1,P2rx7,Slc7a5
GO:0030808	7,8,6,9	regulation of nucleotide biosynthetic process	58	0.004	7	0.0094	0.0184969	E	Tshr,Drd5,Gnai2,Adora2a,Oprd1,Ghrh,Ghrhr
GO:0030802	8,9,7,10	regulation of cyclic nucleotide biosynthetic process	58	0.004	7	0.0094	0.0184969	E	Tshr,Drd5,Gnai2,Adora2a,Oprd1,Ghrh,Ghrhr
[truncated: 2,370 more rows]

## Sheet: GO - CHART 1Mb
GO_ID	LEVEL(S)	TERM	NB_IN_REF	FREQ_IN_REF	NB_IN_SET	FREQ_IN_SET	P_VALUE	ENRICHMENT/DEPLETION	GENES_IN_SET
[truncated: 3,349 more rows]
