# Supplementary material for: The long non-coding RNA Dali is an epigenetic regulator of neural differentiation
Source: eLife journal article supplement (doi:10.7554/elife.04530), 2014-11-21
Supplement: supp [file elife-04530-supp-v1.zip › elife_poa_e04530_Supplementary_File_7.xlsx]

## Sheet: DALI in vitro mass spec
sp|O88477|IF2B1_MOUSE	Insulin-like growth factor 2 mRNA-binding protein 1 OS=Mus musculus GN=Igf2bp1 PE=1 SV=1	Igf2bp1
sp|P09405|NUCL_MOUSE	Nucleolin OS=Mus musculus GN=Ncl PE=1 SV=2	Ncl
sp|Q04750|TOP1_MOUSE	DNA topoisomerase 1 OS=Mus musculus GN=Top1 PE=1 SV=2	Top1
sp|Q7TNV0|DEK_MOUSE	Protein DEK OS=Mus musculus GN=Dek PE=1 SV=1	Dek
sp|Q920B9|SP16H_MOUSE	FACT complex subunit SPT16 OS=Mus musculus GN=Supt16h PE=1 SV=2	Supt16h
tr|Q3UJB0|Q3UJB0_MOUSE	Protein Sf3b2 OS=Mus musculus GN=Sf3b2 PE=2 SV=1	Sf3b2
sp|P25976-2|UBF1_MOUSE	Isoform UBF2 of Nucleolar transcription factor 1 OS=Mus musculus GN=Ubtf	Ubtf
sp|Q8BK67|RCC2_MOUSE	Protein RCC2 OS=Mus musculus GN=Rcc2 PE=2 SV=1	Rcc2
sp|Q8VIJ6|SFPQ_MOUSE	Splicing factor, proline- and glutamine-rich OS=Mus musculus GN=Sfpq PE=1 SV=1	Sfpq
sp|Q99K48|NONO_MOUSE	Non-POU domain-containing octamer-binding protein OS=Mus musculus GN=Nono PE=1 SV=3	Nono
sp|Q91VM5|RMXL1_MOUSE	RNA binding motif protein, X-linked-like-1 OS=Mus musculus GN=Rbmxl1 PE=1 SV=1	Rbmxl1
tr|E9Q0F0|E9Q0F0_MOUSE	Protein Krt78 OS=Mus musculus GN=Krt78 PE=4 SV=1	Krt78
tr|Q921K2|Q921K2_MOUSE	Poly (ADP-ribose) polymerase family, member 1 OS=Mus musculus GN=Parp1 PE=2 SV=1	Parp1
sp|P63038|CH60_MOUSE	60 kDa heat shock protein, mitochondrial OS=Mus musculus GN=Hspd1 PE=1 SV=1	Hspd1
sp|P80314|TCPB_MOUSE	T-complex protein 1 subunit beta OS=Mus musculus GN=Cct2 PE=1 SV=4	Cct2
sp|Q3URS2|ZSC4F_MOUSE	Zinc finger and SCAN domain containing protein 4F OS=Mus musculus GN=Zscan4f PE=2 SV=2	Zscan4f
sp|P13864-2|DNMT1_MOUSE	Isoform 2 of DNA (cytosine-5)-methyltransferase 1 OS=Mus musculus GN=Dnmt1	Dnmt1
sp|P17182|ENOA_MOUSE	Alpha-enolase OS=Mus musculus GN=Eno1 PE=1 SV=3	Eno1
sp|P80315|TCPD_MOUSE	T-complex protein 1 subunit delta OS=Mus musculus GN=Cct4 PE=1 SV=3	Cct4
sp|P97496-2|SMRC1_MOUSE	Isoform 2 of SWI/SNF complex subunit SMARCC1 OS=Mus musculus GN=Smarcc1	Smarcc1
sp|Q60520-1|SIN3A_MOUSE	Isoform 2 of Paired amphipathic helix protein Sin3a OS=Mus musculus GN=Sin3a	Sin3a
sp|Q8K4Z5|SF3A1_MOUSE	Splicing factor 3A subunit 1 OS=Mus musculus GN=Sf3a1 PE=1 SV=1	Sf3a1
sp|Q8VHR5-2|P66B_MOUSE	Isoform 2 of Transcriptional repressor p66-beta OS=Mus musculus GN=Gatad2b	Gatad2b
sp|Q9Z2N8|ACL6A_MOUSE	Actin-like protein 6A OS=Mus musculus GN=Actl6a PE=1 SV=2	Actl6a
sp|O54879|HMGB3_MOUSE	High mobility group protein B3 OS=Mus musculus GN=Hmgb3 PE=2 SV=3	Hmgb3
sp|O54941|SMCE1_MOUSE	SWI/SNF-related matrix-associated actin-dependent regulator of chromatin subfamily E member 1 OS=Mus musculus GN=Smarce1 PE=1 SV=1	Smarce1
sp|P14733|LMNB1_MOUSE	Lamin-B1 OS=Mus musculus GN=Lmnb1 PE=1 SV=3	Lmnb1
sp|Q61937|NPM_MOUSE	Nucleophosmin OS=Mus musculus GN=Npm1 PE=1 SV=1	Npm1
sp|Q6P542|ABCF1_MOUSE	ATP-binding cassette sub-family F member 1 OS=Mus musculus GN=Abcf1 PE=1 SV=1	Npm1
sp|Q8CHY6|P66A_MOUSE	Transcriptional repressor p66 alpha OS=Mus musculus GN=Gatad2a PE=1 SV=2	Gatad2a
sp|P68040|GBLP_MOUSE	Guanine nucleotide-binding protein subunit beta-2-like 1 OS=Mus musculus GN=Gnb2l1 PE=1 SV=3	Gnb2l1
sp|Q7SIG6|ASAP2_MOUSE	Arf-GAP with SH3 domain, ANK repeat and PH domain-containing protein 2 OS=Mus musculus GN= PE=1 SV=3	Asap2
tr|E9PVX6|E9PVX6_MOUSE	Protein Mki67 OS=Mus musculus GN=Mki67 PE=4 SV=1	Mki67
sp|P80317|TCPZ_MOUSE	T-complex protein 1 subunit zeta OS=Mus musculus GN=Cct6a PE=1 SV=3	Cct6a
sp|Q3U9G9|LBR_MOUSE	Lamin-B receptor OS=Mus musculus GN=Lbr PE=1 SV=2	Lbr
sp|Q3TKT4-2|SMCA4_MOUSE	Isoform 2 of Transcription activator BRG1 OS=Mus musculus GN=Smarca4	Smarca4
sp|Q60972|RBBP4_MOUSE	Histone-binding protein RBBP4 OS=Mus musculus GN=Rbbp4 PE=1 SV=5	Rbbp4
sp|Q8C1B7-2|SEP11_MOUSE	Isoform 2 of Septin-11 OS=Mus musculus GN=Sept11	Setp11
sp|P11031|TCP4_MOUSE	Activated RNA polymerase II transcriptional coactivator p15 OS=Mus musculus GN=Sub1 PE=1 SV=3	Sub1
sp|P27773|PDIA3_MOUSE	Protein disulfide-isomerase A3 OS=Mus musculus GN=Pdia3 PE=1 SV=2	Pdia3
sp|P0CG49|UBB_MOUSE	Polyubiquitin-B OS=Mus musculus GN=Ubb PE=1 SV=1	Ubb
sp|Q3TB82|PKHF1_MOUSE	Pleckstrin homology domain-containing family F member 1 OS=Mus musculus GN=Plekhf1 PE=2 SV=1	Plekhf1
tr|F6QFD1|F6QFD1_MOUSE	cAMP-specific 3',5'-cyclic phosphodiesterase 4D (Fragment) OS=Mus musculus GN=Pde4d PE=3 SV=1	Pde4d
sp|P80316|TCPE_MOUSE	T-complex protein 1 subunit epsilon OS=Mus musculus GN=Cct5 PE=1 SV=1	Cct5
sp|P19324|SERPH_MOUSE	Serpin H1 OS=Mus musculus GN=Serpinh1 PE=1 SV=3	Serpinh1
sp|P63158|HMGB1_MOUSE	High mobility group protein B1 OS=Mus musculus GN=Hmgb1 PE=1 SV=2	Hmgb1
sp|Q9ERK4|XPO2_MOUSE	Exportin-2 OS=Mus musculus GN=Cse1l PE=2 SV=1	Cse1l
sp|Q99JF8-2|PSIP1_MOUSE	Isoform 2 of PC4 and SFRS1-interacting protein OS=Mus musculus GN=Psip1	Psip1
sp|Q9JK30-2|ORC3_MOUSE	Isoform 2 of Origin recognition complex subunit 3 OS=Mus musculus GN=Orc3	Orc3
sp|Q9CWS4|INT11_MOUSE	Integrator complex subunit 11 OS=Mus musculus GN=Cpsf3l PE=2 SV=1	Cpsf3l
