# Supplementary figures and images for: The long non-coding RNA Dali is an epigenetic regulator of neural differentiation
Source: eLife journal article supplement (doi:10.7554/elife.04530), 2014-11-21

Figure 1 - figure supplement 1

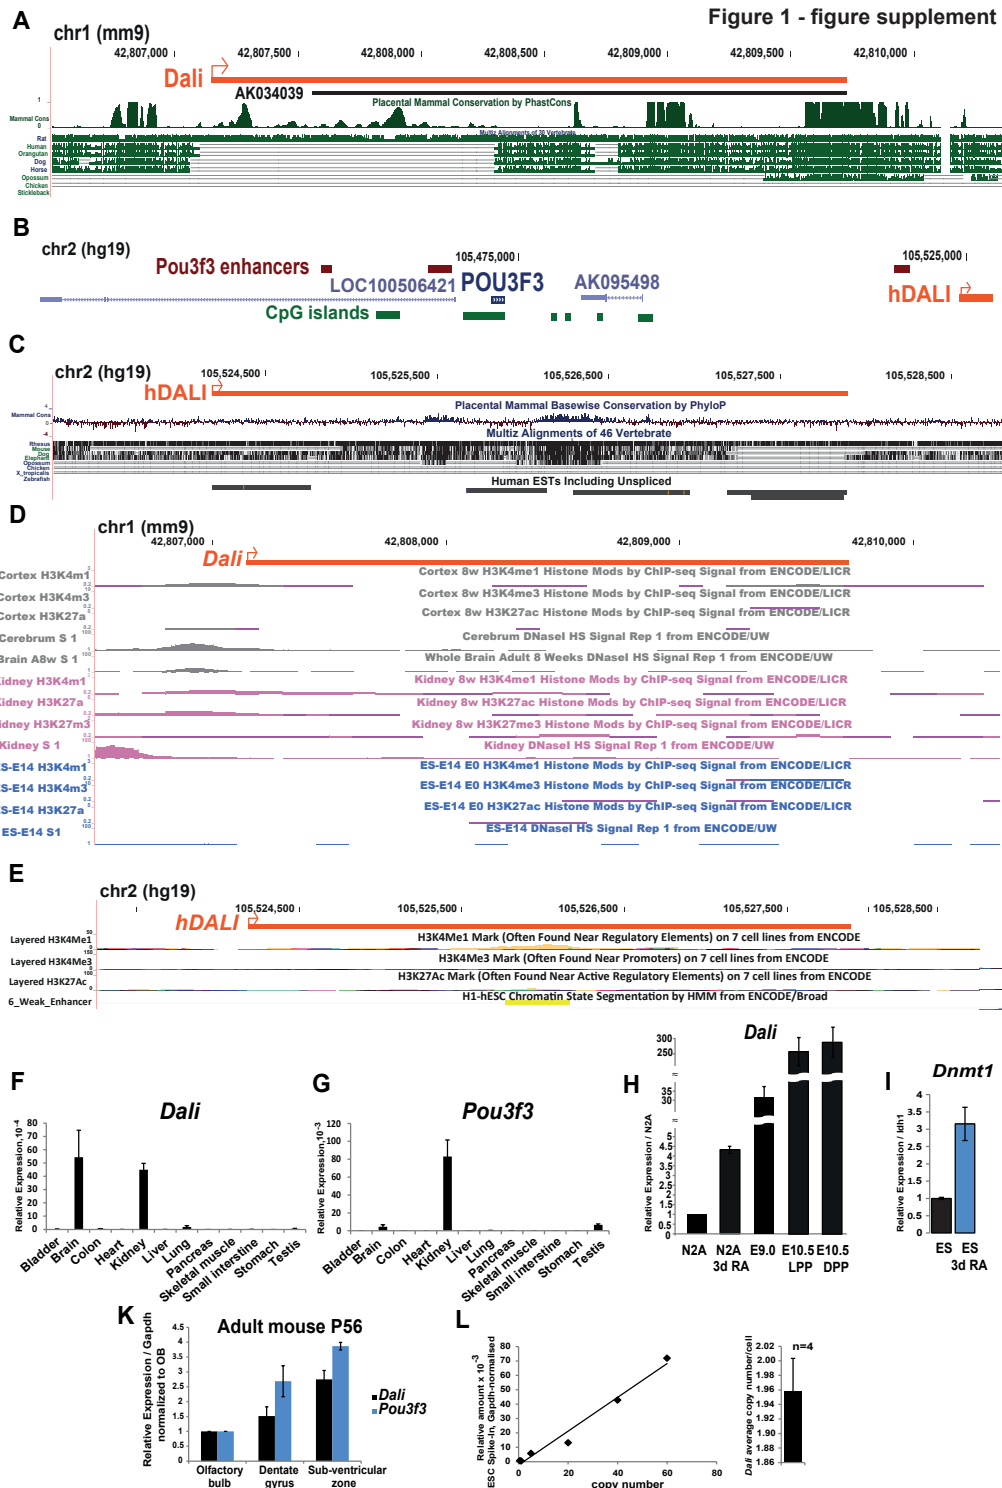

Supplement: supp [file elife-04530-supp-v1.zip › elife_poa_e04530_Figure_1_figure_supplement_1.pdf]

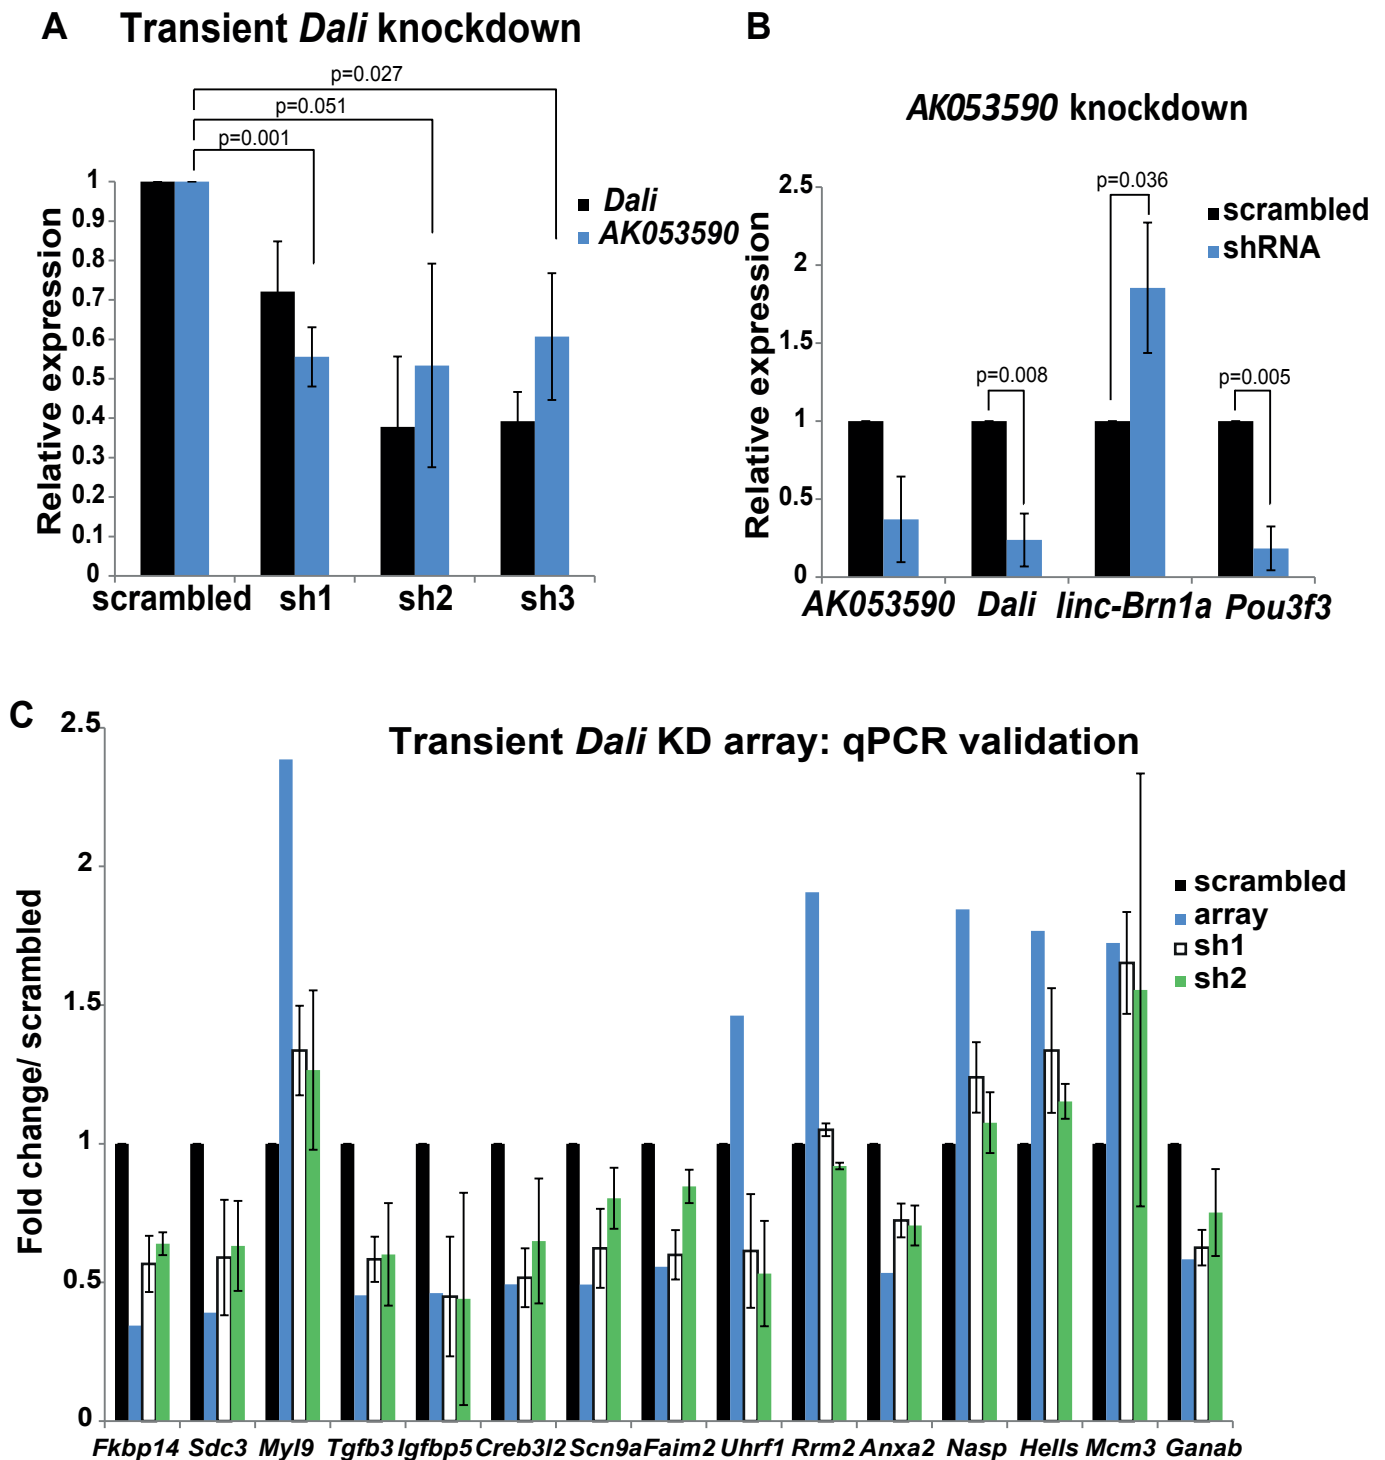

Supplement: supp [file elife-04530-supp-v1.zip › elife_poa_e04530_Figure_2_figure_supplement_1.pdf]

Figure 5 - figure supplement 1

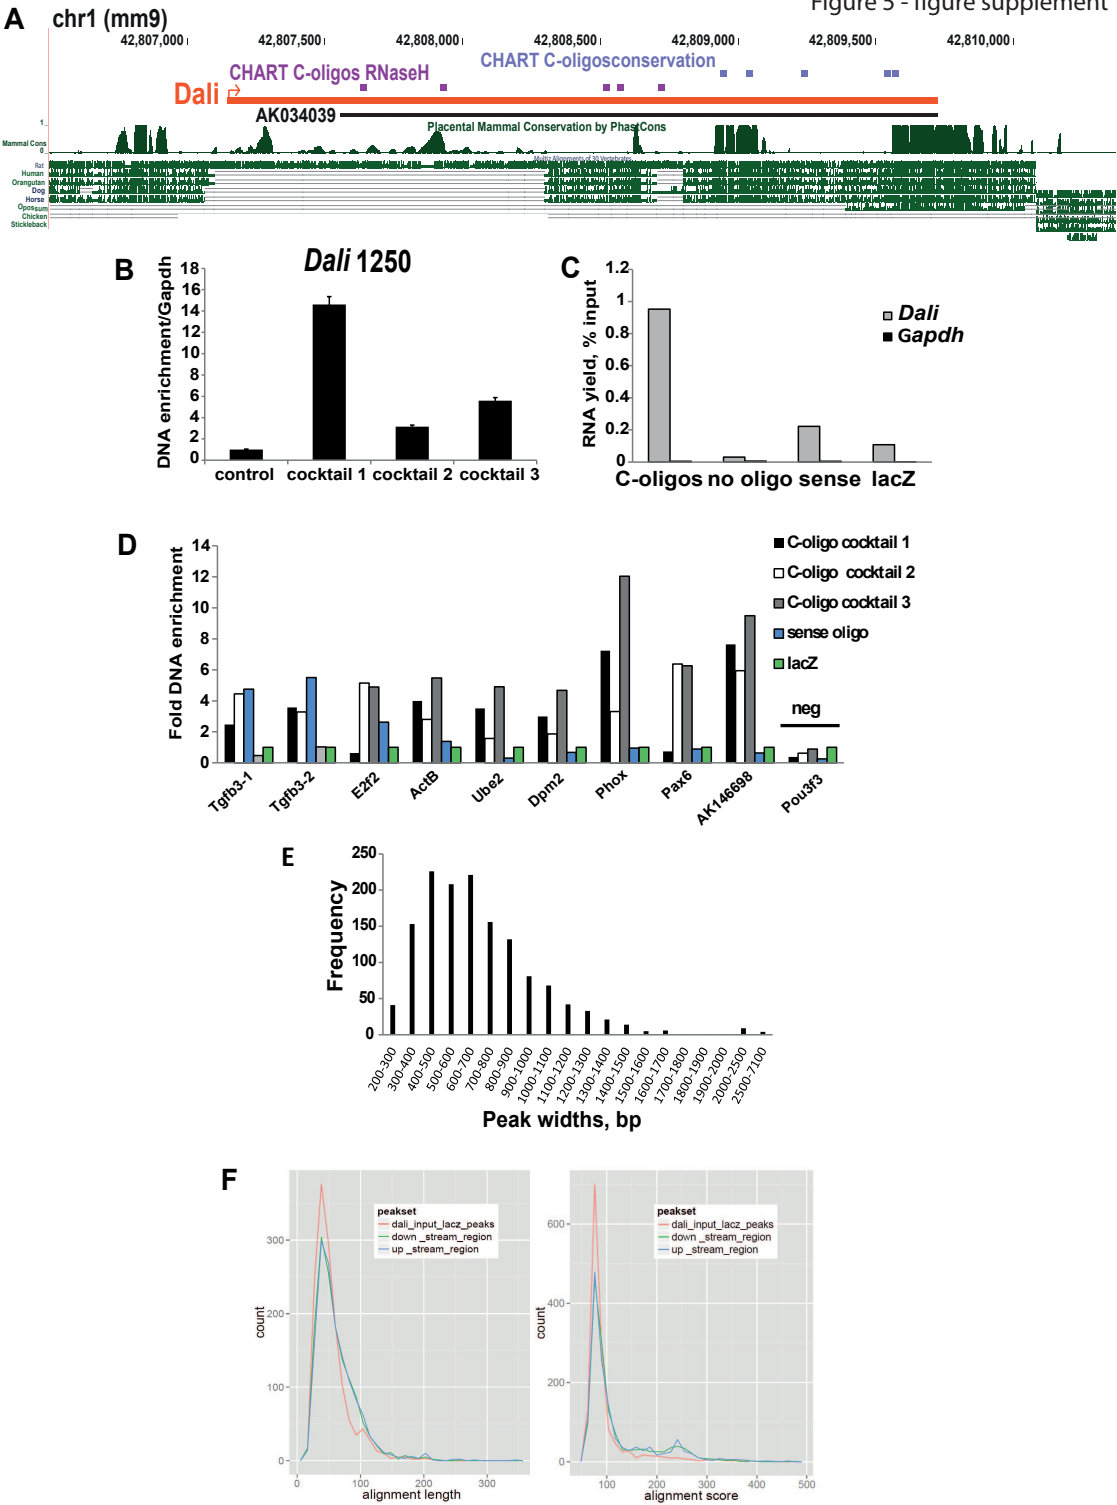

Supplement: supp [file elife-04530-supp-v1.zip › elife_poa_e04530_Figure_5_figure_supplement_1.pdf]

Figure 7 - figure supplement 1

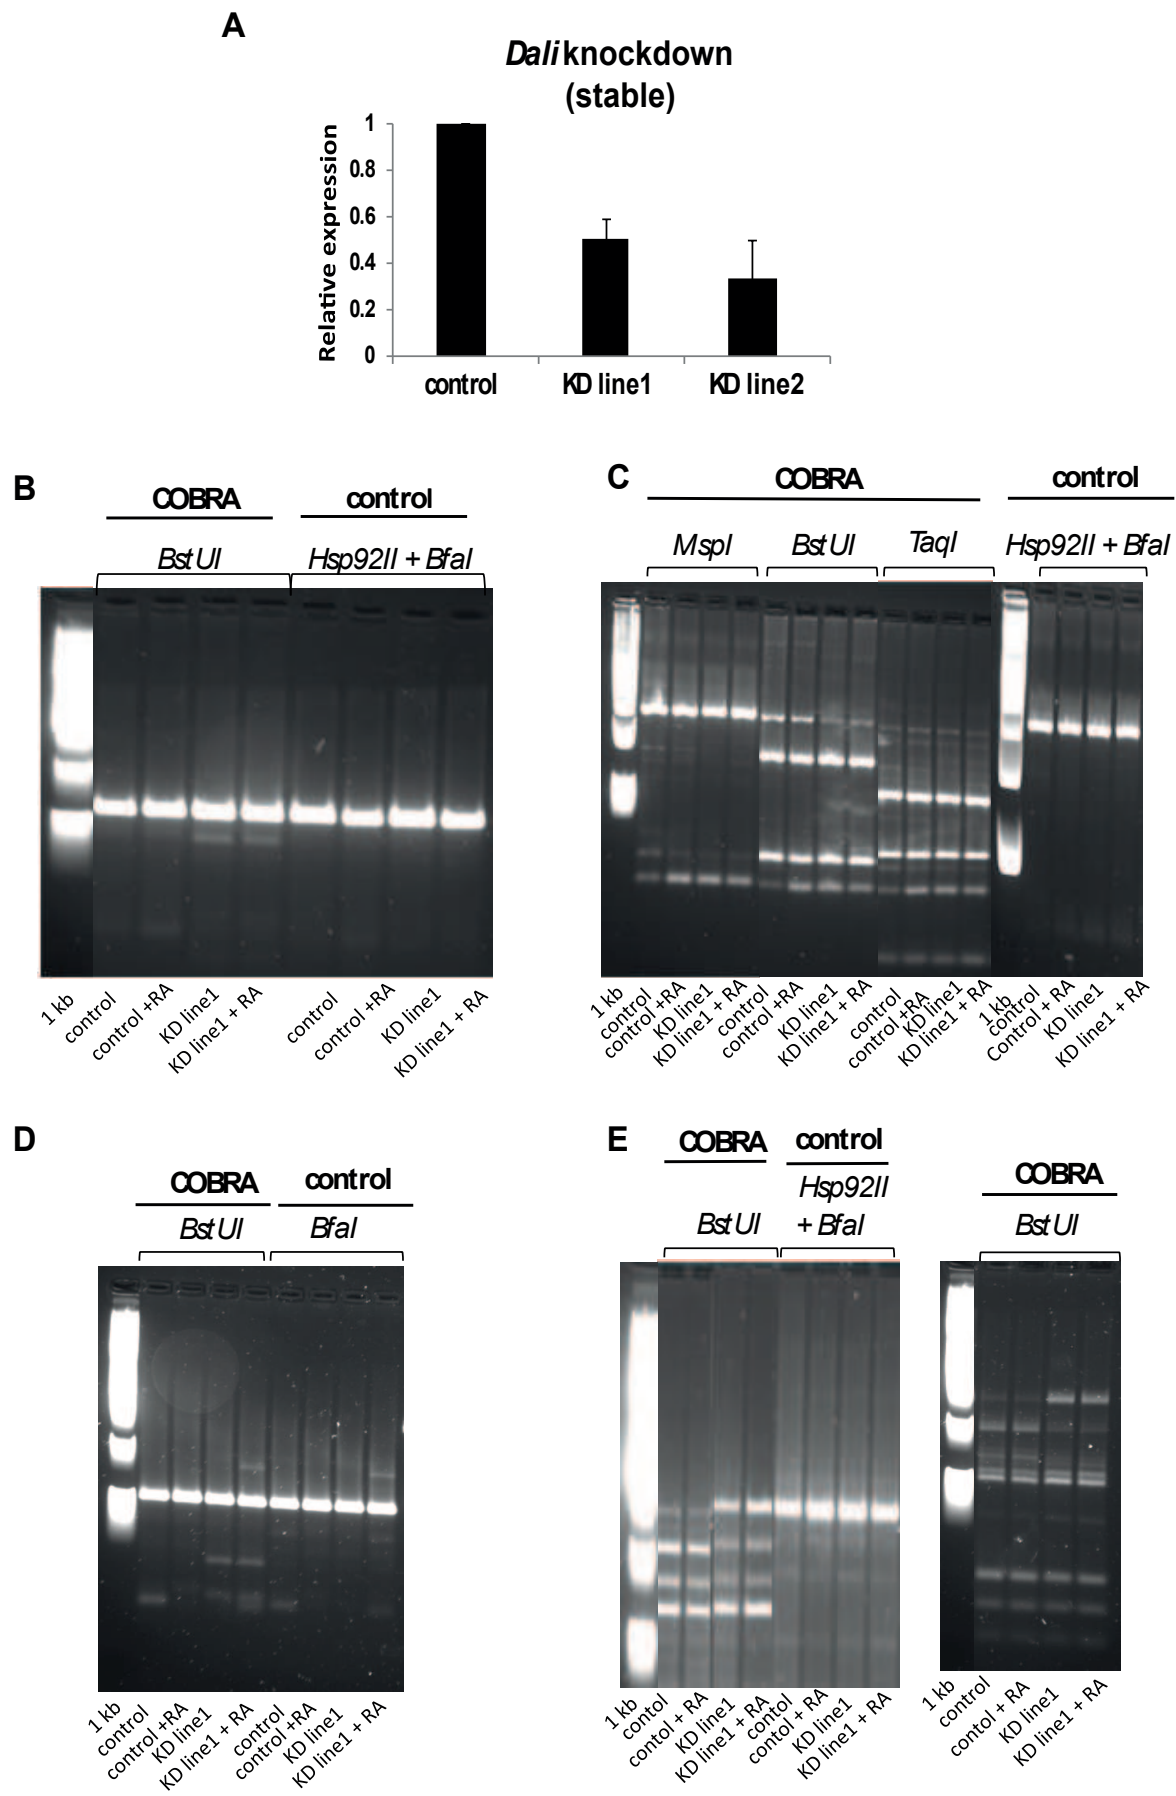

Supplement: supp [file elife-04530-supp-v1.zip › elife_poa_e04530_Figure_7_figure_supplement_1.pdf]

**A**

region 1 region 2 region 3 bait

Pou3f3

AK053590 AK011913

linc-Brn1a linc-Brn1b

Dali

BglII

chr1 (mm9)

42,740,000 | 42,750,000 | 42,760,000 | 42,770,000 | 42,780,000 | 42,790,000 | 42,800,000 | 42,810,000 |

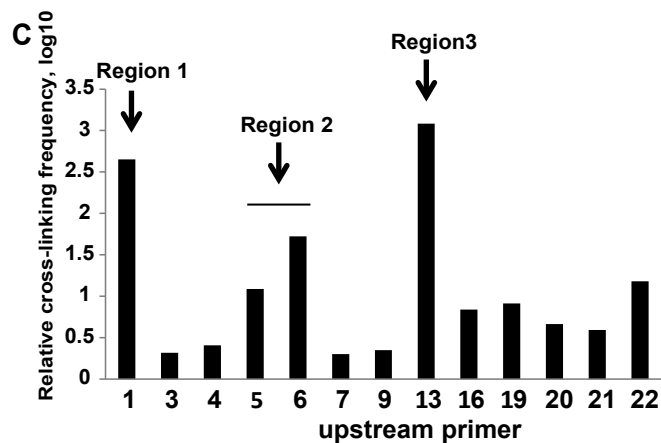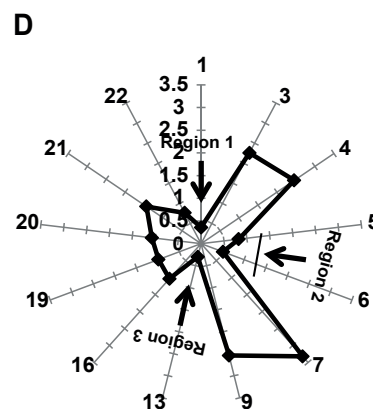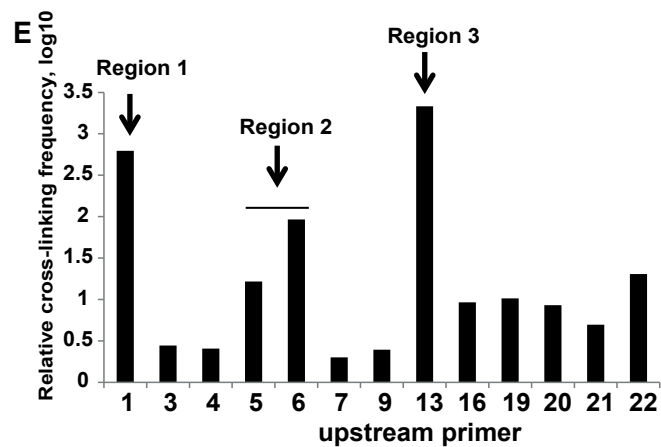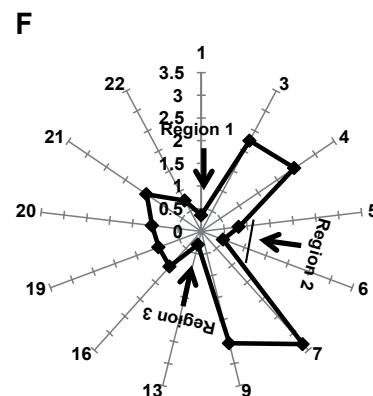

Supplement: supp [file elife-04530-supp-v1.zip › elife_poa_e04530_Figure_1_figure_supplement_2.pdf]

Figure 4 - figure supplement 1

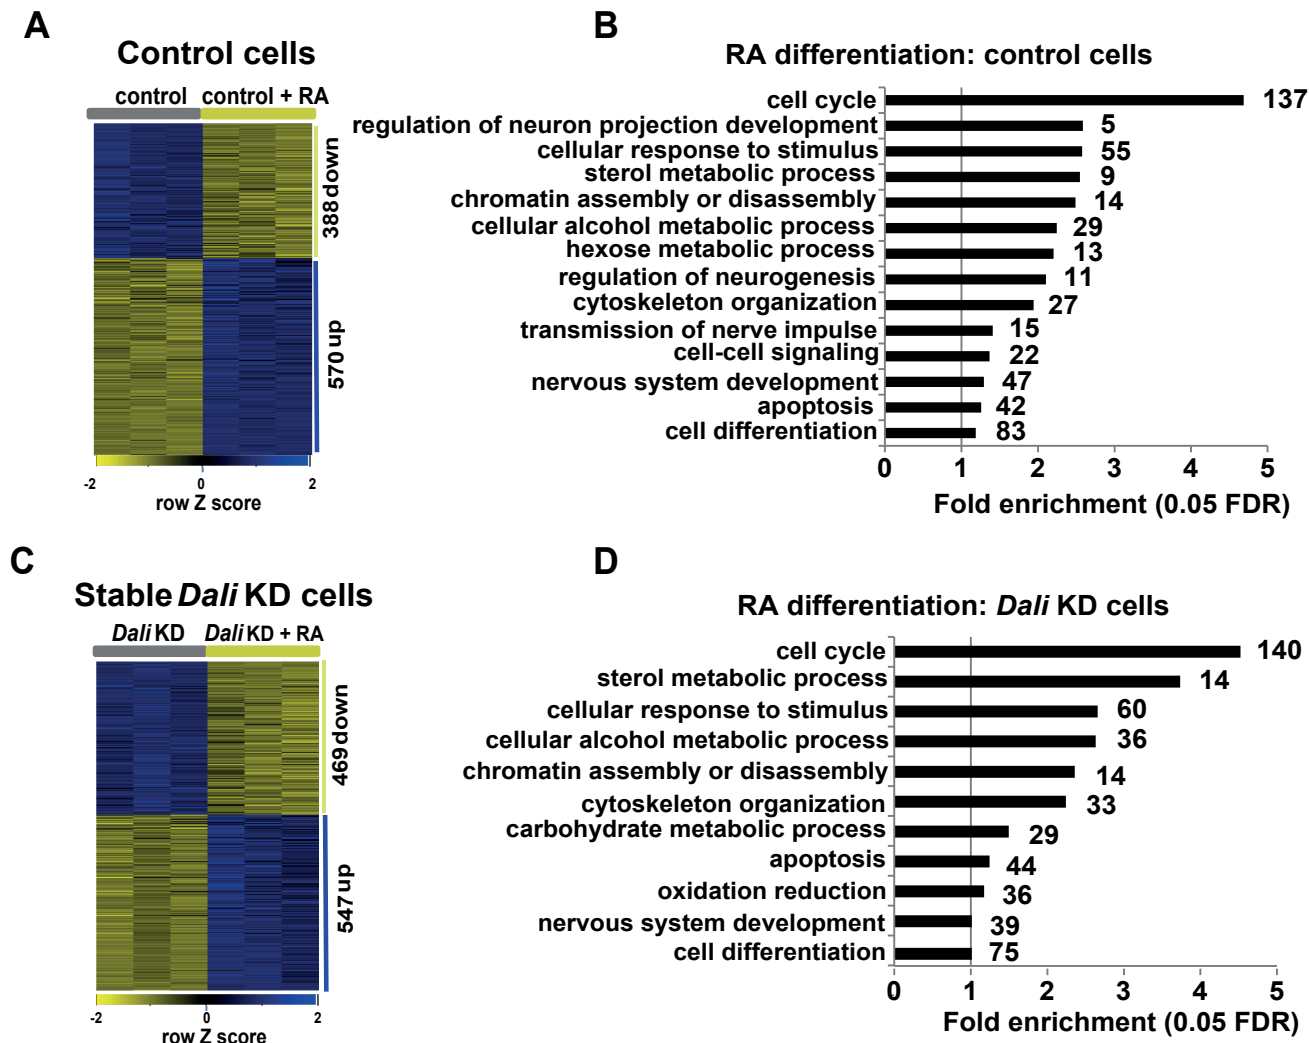

Supplement: supp [file elife-04530-supp-v1.zip › elife_poa_e04530_Figure_4_figure_supplement_1.pdf]
